# Supplementary material for: Single-cell transcriptomes identify human islet cell signatures and reveal cell-type–specific expression changes in type 2 diabetes
Source: Genome Res. 2017 Feb;27(2):208–22. doi: 10.1101/gr.212720.116 (PMC5287227; doi:10.1101/gr.212720.116)
Supplement: Supplemental Material [file supp_gr.212720.116_Supplemental_Table_S1.xlsx]

## Sheet: Patient_Islet_Metadata
Supplemental_Table_S1: Metadata for each of the 5 non-diabetic and 3 Type 2 diabetic patient islet samples.
Table containing relevant biomedical information regarding the 8 cadaveric human islet donors. Information in the table includes for each islet: sample identifiers, UNOS.ID, bulk sample type, biomaterial provider of the islet, patient number, as well as the gender, disease status, BMI, race, age of the donor, microfluidic chip single cell preparation, batch, medication information, and HbA1c leve…
Patient Number	UNOS.ID	Biomaterials Provider	Sex	Status	BMI	Race	Age	Single Cell Preparation	On Diabetes Medication?	Bulk islet RNA-seq sample ID	Type (see Fig.1A)	Sequencing Batch	HbA1c
P1	ACCG268	Prodo Labs	M	ND	32.95	AA	22	C1, C2, C3	No	baseline-03182015_S2	Baseline	1	5.4
P1	ACCG268	Prodo Labs	M	ND	32.95	AA	22	C1, C2, C3	No	Single-cell-bulk-03182015_S4	Dissociated	1	5.4
P1	ACCG268	Prodo Labs	M	ND	32.95	AA	22	C1, C2, C3	No	Untreated-Ctrl-03182015_S3	Intact	1	5.4
P2	ACEK420A	IIDP	F	ND	22	W	53	C5	No	baseline-05202015-Islet-15_S1	Baseline	2	NA
P2	ACEK420A	IIDP	F	ND	22	W	53	C5	No	Single-cell-bulk-05202015_S3	Dissociated	2	NA
P2	ACEK420A	IIDP	F	ND	22	W	53	C5	No	Untreated-Ctrl-05202015_S2	Intact	2	NA
P3	ACEL337	Prodo Labs	M	ND	23	W	29	C6, C7	No	baseline-05222015-Islet-16_S6	Baseline	2	5.1
P3	ACEL337	Prodo Labs	M	ND	23	W	29	C6, C7	No	Single-cell-bulk-05222015_S8	Dissociated	2	5.1
P3	ACEL337	Prodo Labs	M	ND	23	W	29	C6, C7	No	Untreated-Ctrl-05222015_S7	Intact	2	5.1
P4	ACHY057	Prodo Labs	M	ND	55	AA	30	C8	No	baseline-09032015_S2	Baseline	3	5.2
P4	ACHY057	Prodo Labs	M	ND	55	AA	30	C8	No	Single-cell-bulk-c1-09032015_S5	Dissociated	3	5.2
P4	ACHY057	Prodo Labs	M	ND	55	AA	30	C8	No	undissociated-c1-ctrl-09032015_S3	Intact	3	5.2
P5	ACIB065	Prodo Labs	F	ND	26.6	W	56	C9	No	baseline-09102015_S7	Baseline	3	NA
P5	ACIB065	Prodo Labs	F	ND	26.6	W	56	C9	No	Single-cell-bulk-c1-09102015_S10	Dissociated	3	NA
P5	ACIB065	Prodo Labs	F	ND	26.6	W	56	C9	No	undissociated-c1-ctrl-09102015_S8	Intact	3	NA
P6	ACCR015A	Prodo Labs	M	T2D	35.8	H	51	C4	Yes	baseline-03272015_S8	Baseline	1	NA
P6	ACCR015A	Prodo Labs	M	T2D	35.8	H	51	C4	Yes	Single-cell-bulk-03272015_S10	Dissociated	1	NA
P6	ACCR015A	Prodo Labs	M	T2D	35.8	H	51	C4	Yes	Untreated-Ctrl-03272015_S9	Intact	1	NA
P7	ACIW009	Prodo Labs	F	T2D	29.8	W	55	C10, C11	No	baseline-10012015_S12	Baseline	3	7.4
P7	ACIW009	Prodo Labs	F	T2D	29.8	W	55	C10, C11	No	Single-cell-bulk-c1-10012015_S15	Dissociated	3	7.4
P7	ACIW009	Prodo Labs	F	T2D	29.8	W	55	C10, C11	No	undissociated-c1-ctrl-10012015_S13	Intact	3	7.4
P8	ACJV399	Prodo Labs	F	T2D	43	H	42	C12, C13	No	baseline-10292015_S17	Baseline	3	6.5
P8	ACJV399	Prodo Labs	F	T2D	43	H	42	C12, C13	No	Single-cell-bulk-c1-10292015_S20	Dissociated	3	6.5
P8	ACJV399	Prodo Labs	F	T2D	43	H	42	C12, C13	No	undissociated-c1-ctrl-10292015_S18	Intact	3	6.5
