# Supplementary material for: Single-cell transcriptomes identify human islet cell signatures and reveal cell-type–specific expression changes in type 2 diabetes
Source: Genome Res. 2017 Feb;27(2):208–22. doi: 10.1101/gr.212720.116 (PMC5287227; doi:10.1101/gr.212720.116)
Supplement: Supplemental Material [file supp_gr.212720.116_Supplemental_Table_S2.xlsx]

## Sheet: Bulk_stats_and_IDs
Supplemental_Table_S2: Sequencing depth, read alignment, and mitochondrial fraction statistics of single cell and bulk sample transcriptomes.
Table containing unique single cell identifiers, total number of reads, percentage of reads that aligned to the human transcriptome GRCh37, Ensembl v70, and mitochondrial fraction for each single cell and bulk sample transcriptome. Single cell samples that were re-sequenced are highlighted and labeled as a “repeat sample”.
sampleid	number_of_reads	percentage_aligned	mitochondrial_fraction
baseline-03182015_S2	37709341	0.96656	0.0345059
baseline-03272015_S8	40438699	0.96523	0.0248237
Single-cell-bulk-03182015_S4	41067486	0.934327	0.0284391
Single-cell-bulk-03272015_S10	43188017	0.917513	0.0350863
Untreated-Ctrl-03182015_S3	40802007	0.962127	0.0296942
Untreated-Ctrl-03272015_S9	39392942	0.962517	0.0238753
baseline-09032015_S2	8861279	0.957928	0.0350256
baseline-09102015_S7	23603777	0.958136	0.0568146
baseline-10012015_S12	23335682	0.969302	0.0313475
baseline-10292015_S17	24634766	0.968412	0.0302039
Single-cell-bulk-c1-09032015_S5	23567927	0.95708	0.0564301
Single-cell-bulk-c1-09102015_S10	24581933	0.960059	0.0750734
Single-cell-bulk-c1-10012015_S15	21646076	0.954655	0.0441644
Single-cell-bulk-c1-10292015_S20	24003759	0.959026	0.0460705
undissociated-c1-ctrl-09032015_S3	23861583	0.96147	0.0358911
undissociated-c1-ctrl-09102015_S8	22326790	0.963684	0.0597891
undissociated-c1-ctrl-10012015_S13	26094586	0.968407	0.0389398
undissociated-c1-ctrl-10292015_S18	24048976	0.968579	0.0365634
baseline-05202015-Islet-15_S1	48429657	0.969119	0.0154049
baseline-05222015-Islet-16_S6	51373768	0.966515	0.0872775
Single-cell-bulk-05202015_S3	49380023	0.972283	0.0266239
Single-cell-bulk-05222015_S8	50188075	0.962878	0.0763816
Untreated-Ctrl-05202015_S2	55990762	0.969829	0.0195476
Untreated-Ctrl-05222015_S7	52262415	0.960977	0.0673121

## Sheet: Single_cell_stats_and_IDs
sampleid	number_of_reads	percentage_aligned	mitochondrial_fraction	repeat sample?
10th_C10_S104	2101306	0.863268	0.341999	NO
10th_C11_S96	2064511	0.917633	0.108047	NO
10th_C12_S89	2492488	0.889342	0.131465	NO
10th_C13_S61	2573380	0.872786	0.0918172	NO
10th_C14_S53	2437564	0.887805	0.148491	NO
10th_C15_S45	1704631	0.930319	0.913047	NO
10th_C16_S105	2053355	0.851304	0.108779	NO
10th_C17_S97	2064275	0.94167	0.179039	NO
10th_C19_S62	2782217	0.906705	0.0565326	NO
10th_C1_S59	2427806	0.868411	0.0828097	NO
10th_C20_S54	2556407	0.86072	0.113531	NO
10th_C21_S46	2662286	0.905004	0.166522	NO
10th_C22_S106	2339742	0.912423	0.10097	NO
10th_C23_S98	2126124	0.868297	0.201753	NO
10th_C24_S90	2111870	0.870336	0.291553	NO
10th_C25_S47	1936816	0.913639	0.0749542	NO
10th_C26_S55	2458329	0.900749	0.0498406	NO
10th_C27_S63	2726560	0.915318	0.0813178	NO
10th_C28_S91	2667261	0.8865	0.171848	NO
10th_C29_S99	1929974	0.890971	0.603685	NO
10th_C2_S51	1196851	0.934102	0.932776	NO
10th_C30_S107	2650150	0.889344	0.0876002	NO
10th_C31_S48	1988752	0.870318	0.0432841	NO
10th_C32_S56	2659331	0.93259	0.117158	NO
10th_C33_S64	2364859	0.927661	0.154739	NO
10th_C34_S92	2838069	0.907335	0.0198459	NO
10th_C35_S100	964166	0.92688	0.831554	NO
10th_C36_S108	1783797	0.913811	0.0778825	NO
10th_C37_S49	2395194	0.896427	0.173633	NO
10th_C38_S57	1213824	0.912683	0.565639	NO
10th_C39_S65	2691008	0.936137	0.190505	NO
10th_C3_S43	1575378	0.9382	0.85374	NO
10th_C40_S93	2730588	0.873401	0.0974362	NO
10th_C41_S101	2219330	0.894642	0.129111	NO
10th_C42_S109	3059791	0.952542	0.0350366	NO
10th_C43_S50	2084471	0.891657	0.115406	NO
10th_C44_S58	1346439	0.931189	0.748242	NO
10th_C45_S66	2141289	0.887601	0.0854056	NO
10th_C46_S94	2632900	0.886535	0.0509826	NO
10th_C47_S102	1310566	0.942922	0.914098	NO
10th_C4_S103	2304000	0.883598	0.0682885	NO
10th_C50_S73	2317939	0.929386	0.05741	NO
10th_C51_S80	1898862	0.90611	0.0260463	NO
10th_C52_S110	2494250	0.885328	0.0345368	NO
10th_C53_S118	2213252	0.92031	0.130802	NO
10th_C54_S124	2766639	0.858252	0.388189	NO
10th_C55_S67	2436180	0.885687	0.0834471	NO
10th_C56_S74	2644149	0.873891	0.0716574	NO
10th_C57_S81	2427791	0.881083	0.0312362	NO
10th_C58_S111	2102134	0.864349	0.184284	NO
10th_C5_S95	1755144	0.887913	0.064837	NO
10th_C60_S125	2713399	0.856558	0.0593871	NO
10th_C61_S68	2089984	0.901594	0.0477823	NO
10th_C63_S82	1822843	0.900277	0.115993	NO
10th_C64_S112	2554236	0.91321	0.149251	NO
10th_C66_S126	2271630	0.937319	0.0999559	NO
10th_C67_S69	2816966	0.948745	0.0184707	NO
10th_C68_S75	2116344	0.89095	0.527625	NO
10th_C69_S83	1431483	0.919071	0.381686	NO
10th_C6_S88	2197846	0.879416	0.0624259	NO
10th_C70_S113	1226260	0.91938	0.739495	NO
10th_C71_S119	2589759	0.933542	0.148969	NO
10th_C72_S127	1072093	0.948086	0.959253	NO
10th_C73_S84	2432089	0.905899	0.0537819	NO
10th_C74_S76	2516049	0.877544	0.0535848	NO
10th_C76_S128	2723005	0.873386	0.137747	NO
10th_C77_S120	2251292	0.926209	0.0528121	NO
10th_C78_S114	2299552	0.89217	0.217249	NO
10th_C79_S85	2290679	0.868469	0.0880828	NO
10th_C7_S60	2737163	0.880704	0.0576788	NO
10th_C80_S77	2617487	0.949708	0.21632	NO
10th_C81_S70	2317853	0.893735	0.0502368	NO
10th_C82_S129	1617638	0.927775	0.680718	NO
10th_C83_S121	2245634	0.922061	0.0571972	NO
10th_C84_S115	2715510	0.891599	0.111819	NO
10th_C85_S86	2387314	0.876796	0.153338	NO
10th_C86_S78	2325365	0.949943	0.0905186	NO
10th_C87_S71	2409181	0.931879	0.0347714	NO
10th_C88_S130	2737752	0.885524	0.0561687	NO
10th_C89_S122	1951627	0.864842	0.0842904	NO
10th_C8_S52	2201728	0.870873	0.184717	NO
10th_C90_S116	2713141	0.868331	0.0549174	NO
10th_C91_S87	2263796	0.882932	0.0788236	NO
10th_C92_S79	1059737	0.911447	0.856477	NO
10th_C93_S72	894093	0.893748	0.648796	NO
10th_C94_S131	2461802	0.891707	0.0655694	NO
10th_C95_S123	2550827	0.912809	0.0378109	NO
10th_C96_S117	2029745	0.888371	0.0205529	NO
10th_C9_S44	1189253	0.924144	0.817749	NO
11th-C10_S63	1780600	0.895237	0.176965	NO
11th-C11_S55	2313496	0.869181	0.0932972	NO
11th-C12_S47	2506826	0.885876	0.0341985	NO
11th-C13_S17	2135047	0.888793	0.111892	NO
11th-C14_S10	1879208	0.880233	0.0956396	NO
11th-C15_S3	1882811	0.87941	0.102749	NO
11th-C16_S64	2325575	0.868915	0.196948	NO
11th-C17_S56	2244319	0.885202	0.193953	NO
11th-C18_S48	2260526	0.879054	0.0423452	NO
11th-C19_S18	2245100	0.944111	0.177029	NO
11th-C20_S11	2346787	0.934691	0.0429273	NO
11th-C21_S4	2395682	0.898776	0.181133	NO
11th-C22_S65	2678206	0.917444	0.104169	NO
11th-C23_S57	2420689	0.859874	0.212885	NO
11th-C24_S49	2625887	0.885437	0.0842492	NO
11th-C25_S5	2727011	0.868109	0.131691	NO
11th-C26_S12	1945581	0.899403	0.162673	NO
11th-C27_S19	2251490	0.920378	0.148507	NO
11th-C28_S50	1264463	0.916627	0.72209	NO
11th-C29_S58	2491548	0.89429	0.0292458	NO
11th-C2_S8	2376751	0.928914	0.0346027	NO
11th-C30_S66	1982952	0.886376	0.287635	NO
11th-C32_S13	2388286	0.893059	0.0870942	NO
11th-C33_S20	1699597	0.914629	0.511218	NO
11th-C34_S51	1367953	0.903361	0.650048	NO
11th-C35_S59	2725532	0.917108	0.0911527	NO
11th-C36_S67	2967929	0.871491	0.239661	NO
11th-C37_S6	2568213	0.90296	0.0688623	NO
11th-C38_S14	1633699	0.929695	0.899647	NO
11th-C39_S21	2376116	0.844013	0.112899	NO
11th-C3_S1	2535893	0.899322	0.0360803	NO
11th-C40_S52	2477854	0.884184	0.0393394	NO
11th-C41_S60	2677983	0.883311	0.103535	NO
11th-C42_S68	1307820	0.912925	0.778218	NO
11th-C43_S7	2337705	0.890208	0.311988	NO
11th-C44_S15	1918628	0.874188	0.0753962	NO
11th-C45_S22	1501994	0.949437	0.91185	NO
11th-C46_S53	1952054	0.871681	0.0602094	NO
11th-C47_S61	1180454	0.892939	0.589076	NO
11th-C48_S69	1420963	0.951679	0.778144	NO
11th-C49_S23	2478772	0.87983	0.0917043	NO
11th-C4_S62	2250752	0.914264	0.19397	NO
11th-C50_S31	1281402	0.949388	0.95388	NO
11th-C51_S39	2226626	0.882519	0.0968898	NO
11th-C52_S70	2554161	0.865121	0.0792339	NO
11th-C53_S78	3007718	0.873149	0.104417	NO
11th-C54_S86	2982508	0.879124	0.165133	NO
11th-C55_S24	1846879	0.881373	0.247253	NO
11th-C56_S32	1208647	0.915683	0.10048	NO
11th-C57_S40	2319543	0.911857	0.0238138	NO
11th-C58_S71	2868407	0.868149	0.0517558	NO
11th-C59_S79	2735589	0.869394	0.020446	NO
11th-C5_S54	2567144	0.882812	0.0289253	NO
11th-C60_S87	3046074	0.85824	0.0394246	NO
11th-C61_S25	2486696	0.872085	0.0472785	NO
11th-C62_S33	2131780	0.870426	0.281885	NO
11th-C63_S41	2138212	0.871823	0.116158	NO
11th-C64_S72	2825535	0.909965	0.0595466	NO
11th-C65_S80	2560965	0.860786	0.0885705	NO
11th-C66_S88	2864673	0.872922	0.102516	NO
11th-C67_S26	2096634	0.898234	0.0382856	NO
11th-C68_S34	2240507	0.904271	0.145163	NO
11th-C69_S42	2383015	0.877184	0.0522382	NO
11th-C6_S46	1021586	0.918368	0.610103	NO
11th-C70_S73	2771224	0.911972	0.104803	NO
11th-C71_S81	2459587	0.881931	0.0575582	NO
11th-C72_S89	3120997	0.915216	0.101651	NO
11th-C74_S35	2427455	0.87525	0.0540917	NO
11th-C75_S27	1140003	0.925931	0.893158	NO
11th-C76_S90	2962112	0.912523	0.171798	NO
11th-C77_S82	2281863	0.898461	0.0433564	NO
11th-C78_S74	2760056	0.895589	0.0782909	NO
11th-C79_S43	2256706	0.870541	0.052066	NO
11th-C7_S16	2558140	0.905528	0.0706728	NO
11th-C80_S36	2338153	0.874097	0.0590968	NO
11th-C81_S28	2370477	0.881499	0.0854983	NO
11th-C82_S91	2670469	0.897283	0.0914926	NO
11th-C83_S83	2575064	0.870441	0.340133	NO
11th-C84_S75	2842116	0.876377	0.0892228	NO
11th-C85_S44	2439766	0.868147	0.0582689	NO
11th-C86_S37	2397946	0.892435	0.0926107	NO
11th-C87_S29	2485265	0.879646	0.0701059	NO
11th-C88_S92	3275129	0.904356	0.0879786	NO
11th-C89_S84	2858906	0.899034	0.110594	NO
11th-C8_S9	1026927	0.909094	0.889909	NO
11th-C90_S76	2907217	0.87456	0.0516585	NO
11th-C91_S45	1980132	0.898949	0.0625964	NO
11th-C92_S38	1895612	0.886338	0.0312856	NO
11th-C93_S30	2137851	0.906968	0.0397223	NO
11th-C94_S93	2723791	0.895185	0.0569525	NO
11th-C95_S85	2297231	0.869297	0.053501	NO
11th-C96_S77	2825077	0.877141	0.0906757	NO
11th-C9_S2	2767944	0.883265	0.0615948	NO
12th-61_S204	2656573	0.894089	0.0863697	NO
12th-C10_S155	2236902	0.918956	0.066923	NO
12th-C11_S147	2438394	0.879977	0.0592675	NO
12th-C12_S139	2901252	0.878561	0.0840653	NO
12th-C13_S197	2768311	0.877869	0.120772	NO
12th-C14_S190	2528053	0.880233	0.123767	NO
12th-C15_S183	2175189	0.932528	0.125633	NO
12th-C16_S156	3328158	0.88435	0.0423801	NO
12th-C17_S148	2914063	0.897821	0.0536548	NO
12th-C18_S140	2071748	0.951025	0.974481	NO
12th-C19_S198	2773706	0.874933	0.0771574	NO
12th-C1_S195	1659661	0.8963	0.108473	NO
12th-C20_S191	1973542	0.865317	0.151103	NO
12th-C21_S184	2002965	0.909958	0.175384	NO
12th-C23_S149	2494415	0.904405	0.0986103	NO
12th-C24_S141	2732385	0.876721	0.108872	NO
12th-C25_S185	2313695	0.863755	0.113409	NO
12th-C26_S192	2365816	0.87271	0.126027	NO
12th-C27_S199	2361415	0.951551	0.974202	NO
12th-C28_S142	2843886	0.866371	0.0652837	NO
12th-C29_S150	2910850	0.878024	0.0867982	NO
12th-C30_S157	3003616	0.873727	0.130396	NO
12th-C31_S186	2698629	0.889282	0.0623912	NO
12th-C32_S193	1800495	0.904868	0.120857	NO
12th-C33_S200	2369046	0.884438	0.103889	NO
12th-C34_S143	2724832	0.875642	0.0444789	NO
12th-C35_S151	2545959	0.922995	0.15088	NO
12th-C36_S158	2869181	0.927287	0.0348949	NO
12th-C37_S187	1717431	0.845367	0.0419249	NO
12th-C38_S194	1975311	0.891841	0.00751243	NO
12th-C39_S201	2327264	0.908122	0.043158	NO
12th-C3_S181	1960108	0.936504	0.149607	NO
12th-C40_S144	1726905	0.865421	0.318374	NO
12th-C41_S152	2380312	0.927495	0.22089	NO
12th-C42_S159	2805594	0.888175	0.119807	NO
12th-C43_S188	1754634	0.936672	0.934305	NO
12th-C45_S202	2766727	0.922892	0.194999	NO
12th-C46_S145	3058986	0.883242	0.0615093	NO
12th-C47_S153	2402161	0.921543	0.129366	NO
12th-C48_S160	2404915	0.878528	0.13401	NO
12th-C4_S154	1767423	0.894584	0.162106	NO
12th-C50_S210	2752662	0.911375	0.0812375	NO
12th-C51_S217	2280280	0.878999	0.0627291	NO
12th-C52_S161	2696429	0.883277	0.0623318	NO
12th-C53_S168	2713794	0.909625	0.059816	NO
12th-C54_S175	2112691	0.948944	0.90446	NO
12th-C55_S203	2768312	0.894906	0.0831774	NO
12th-C56_S211	2648697	0.899839	0.0929933	NO
12th-C57_S218	2134077	0.908361	0.0054883	NO
12th-C58_S162	3061406	0.859558	0.0412702	NO
12th-C59_S169	3092161	0.881743	0.0872764	NO
12th-C5_S146	2016286	0.872457	0.0835497	NO
12th-C60_S176	3109849	0.871307	0.109418	NO
12th-C62_S212	3083248	0.870916	0.0975356	NO
12th-C63_S219	2504005	0.877491	0.0598062	NO
12th-C64_S163	3387871	0.873813	0.0877286	NO
12th-C65_S170	3601391	0.90061	0.093935	NO
12th-C67_S205	1673013	0.882996	0.105949	NO
12th-C68_S213	2852465	0.885814	0.0272044	NO
12th-C69_S135	2268392	0.867412	0.0335553	NO
12th-C6_S138	1243423	0.924465	0.917786	NO
12th-C71_S171	2790875	0.926607	0.0504916	NO
12th-C74_S214	2933346	0.87216	0.0790499	NO
12th-C75_S206	2795689	0.920389	0.0288757	NO
12th-C76_S177	3284811	0.892799	0.0979289	NO
12th-C77_S172	3198274	0.880378	0.0840218	NO
12th-C78_S164	3353502	0.871639	0.0770797	NO
12th-C79_S136	2313419	0.955995	0.016717	NO
12th-C7_S196	2717202	0.903073	0.106105	NO
12th-C80_S215	2827982	0.883416	0.0476841	NO
12th-C81_S207	2774961	0.882376	0.026205	NO
12th-C82_S178	2774871	0.881217	0.0536945	NO
12th-C83_S173	2774437	0.881173	0.0309635	NO
12th-C84_S165	2920090	0.871439	0.105881	NO
12th-C85_S137	2433333	0.876458	0.0699918	NO
12th-C86_S216	2550230	0.873833	0.0545255	NO
12th-C87_S208	2357419	0.879483	0.0587862	NO
12th-C88_S179	2590722	0.921656	0.0369176	NO
12th-C8_S189	2380481	0.902501	0.0879584	NO
12th-C90_S166	3035777	0.89164	0.0943309	NO
12th-C93_S209	2324194	0.916136	0.0987968	NO
12th-C94_S180	2714975	0.878639	0.0320009	NO
12th-C95_S174	3167044	0.865354	0.0440923	NO
12th-C96_S167	3107926	0.875348	0.0918573	NO
12th-C9_S182	938388	0.926977	0.868808	NO
13th_61_S157	2179094	0.865604	0.0804743	NO
13th_C10_S192	1725866	0.955518	0.971233	NO
13th_C11_S185	1920618	0.867718	0.083144	NO
13th_C12_S178	2056972	0.864182	0.064457	NO
13th_C13_S149	2079647	0.87724	0.0484311	NO
13th_C14_S141	1749537	0.881204	0.0711024	NO
13th_C15_S134	2108184	0.877765	0.11718	NO
13th_C16_S193	2124064	0.861887	0.155222	NO
13th_C17_S186	1919990	0.869105	0.105261	NO
13th_C18_S179	2151347	0.888926	0.0405196	NO
13th_C19_S150	1624532	0.927527	0.212605	NO
13th_C1_S147	1599332	0.919957	0.104887	NO
13th_C20_S142	1521851	0.885765	0.0815486	NO
13th_C21_S135	1378319	0.874369	0.0478079	NO
13th_C22_S194	2024865	0.855969	0.0632221	NO
13th_C23_S187	2011482	0.857274	0.0382119	NO
13th_C24_S180	1533488	0.944658	0.831802	NO
13th_C25_S136	2318615	0.889124	0.0702821	NO
13th_C26_S143	1769338	0.876886	0.0682896	NO
13th_C27_S151	2095419	0.921069	0.0321385	NO
13th_C29_S188	1702903	0.903524	0.10276	NO
13th_C30_S195	2517928	0.881995	0.0513401	NO
13th_C31_S137	1768724	0.874851	0.0440855	NO
13th_C32_S144	851629	0.930163	0.751957	NO
13th_C33_S152	2424099	0.878594	0.068255	NO
13th_C34_S181	2346588	0.886369	0.0935789	NO
13th_C35_S189	1612274	0.875166	0.0966494	NO
13th_C36_S196	2478789	0.889086	0.0251229	NO
13th_C37_S138	1740866	0.848707	0.0468397	NO
13th_C38_S145	2031216	0.915022	0.058864	NO
13th_C39_S153	1948730	0.845072	0.0812537	NO
13th_C3_S132	1336772	0.891528	0.049437	NO
13th_C40_S182	1853445	0.876879	0.0538539	NO
13th_C41_S190	1397958	0.866447	0.0557467	NO
13th_C42_S197	1814102	0.903492	0.0428957	NO
13th_C43_S139	1992624	0.913745	0.151335	NO
13th_C44_S146	1612067	0.900675	0.0684918	NO
13th_C45_S154	1735824	0.883312	0.0578781	NO
13th_C46_S183	1536784	0.876055	0.135688	NO
13th_C49_S155	1626486	0.87649	0.0515945	NO
13th_C4_S191	1480674	0.902601	0.10361	NO
13th_C50_S163	1519609	0.875397	0.0683875	NO
13th_C51_S170	1236311	0.867461	0.0816321	NO
13th_C52_S198	1653323	0.889123	0.317754	NO
13th_C53_S205	1330193	0.886648	0.119657	NO
13th_C54_S212	2069949	0.901577	0.00387321	NO
13th_C55_S156	2292876	0.866167	0.0224668	NO
13th_C57_S171	1284480	0.910472	0.0666452	NO
13th_C58_S199	2369724	0.865167	0.0770019	NO
13th_C59_S206	1902453	0.887695	0.0658394	NO
13th_C5_S184	1206135	0.876488	0.076369	NO
13th_C60_S213	2076934	0.852386	0.0645194	NO
13th_C62_S164	1931071	0.865207	0.0490589	NO
13th_C63_S172	1902018	0.866515	0.133962	NO
13th_C64_S200	2030874	0.881379	0.0947137	NO
13th_C65_S207	1967558	0.868425	0.081902	NO
13th_C66_S214	2425849	0.87506	0.0662266	NO
13th_C67_S158	1829933	0.861127	0.0922257	NO
13th_C68_S165	1551515	0.873681	0.118222	NO
13th_C69_S173	1628886	0.86998	0.0418222	NO
13th_C6_S177	1445707	0.89157	0.0243037	NO
13th_C70_S201	1803013	0.865857	0.107868	NO
13th_C71_S208	1760185	0.872451	0.0922081	NO
13th_C72_S215	1997603	0.877681	0.0692191	NO
13th_C74_S166	2102098	0.917833	0.147163	NO
13th_C75_S159	2172864	0.893218	0.0904873	NO
13th_C76_S216	2620926	0.866436	0.0591341	NO
13th_C77_S209	2127754	0.922312	0.0374261	NO
13th_C78_S202	2643213	0.874225	0.0709055	NO
13th_C79_S174	2442221	0.873098	0.0422809	NO
13th_C7_S148	2150264	0.894554	0.0623477	NO
13th_C80_S167	1831147	0.875144	0.0930019	NO
13th_C81_S160	1768782	0.883889	0.102159	NO
13th_C82_S217	2423569	0.88186	0.0680239	NO
13th_C83_S210	1862403	0.910908	0.0443992	NO
13th_C85_S175	1309153	0.894917	0.105103	NO
13th_C86_S168	1543143	0.896741	0.0558954	NO
13th_C87_S161	1854388	0.899387	0.0451544	NO
13th_C88_S218	1939819	0.885413	0.0646916	NO
13th_C89_S211	1324047	0.890583	0.0888765	NO
13th_C8_S140	1855665	0.894476	0.0625631	NO
13th_C90_S203	2130402	0.885325	0.0612341	NO
13th_C91_S176	1400727	0.870139	0.0710788	NO
13th_C92_S169	1340218	0.907736	0.0901609	NO
13th_C93_S162	1383446	0.899518	0.0112546	NO
13th_C94_S219	1815521	0.869831	0.0906957	NO
13th_C96_S204	1802636	0.864345	0.0893651	NO
13th_C9_S133	1812530	0.889184	0.081391	NO
1st-61_S27	4498487	0.892552	0.0995191	NO
1st-C10_S66	4535328	0.916105	0.0831947	NO
1st-C11_S58	4844752	0.879885	0.177928	NO
1st-C13_S19	4685428	0.929298	0.299886	NO
1st-C15_S3	3822246	0.909229	0.0970403	NO
1st-C16_S67	4687175	0.892303	0.0600513	NO
1st-C17_S59	4963812	0.912778	0.119196	NO
1st-C18_S51	5207840	0.920943	0.0401758	NO
1st-C19_S20	3943200	0.89487	0.0589647	NO
1st-C1_S17	3670578	0.887426	0.0515862	NO
1st-C20_S12	3346613	0.923081	0.0683536	NO
1st-C21_S4	3726043	0.882901	0.0237022	NO
1st-C22_S68	3667818	0.895549	0.168205	NO
1st-C24_S52	3058081	0.891334	0.0188359	NO
1st-C26_S13	4025451	0.886661	0.0975901	NO
1st-C28_S53	3681079	0.907726	0.0464351	NO
1st-C29_S61	3998611	0.888665	0.0736158	NO
1st-C2_S9	2704221	0.887683	0.0458106	NO
1st-C31_S6	4176334	0.871624	0.0895924	NO
1st-C32_S14	3776761	0.906755	0.110325	NO
1st-C34_S54	3855011	0.889737	0.0742288	NO
1st-C36_S70	3662473	0.904329	0.0971983	NO
1st-C37_S7	3638485	0.906054	0.101982	NO
1st-C39_S23	4512393	0.924317	0.12213	NO
1st-C3_S1	2712440	0.893771	0.0294722	NO
1st-C40_S55	4502850	0.888942	0.0600764	NO
1st-C41_S63	3880206	0.890621	0.0455951	NO
1st-C42_S71	3848661	0.905126	0.0224912	NO
1st-C43_S8	2962720	0.883194	0.0834571	NO
1st-C45_S24	3878070	0.894948	0.0946203	NO
1st-C46_S56	4055807	0.898232	0.115546	NO
1st-C48_S72	3709945	0.918683	0.103742	NO
1st-C49_S25	1861751	0.895258	0.0290141	NO
1st-C4_S65	3685615	0.895372	0.0361124	NO
1st-C50_S33	3751070	0.880775	0.0430677	NO
1st-C51_S41	3033587	0.907432	0.02491	NO
1st-C53_S74	3577614	0.887815	0.0378546	NO
1st-C54_S75	3219425	0.884856	0.0456091	NO
1st-C55_S26	4110452	0.916302	0.0196136	NO
1st-C56_S34	5076541	0.884436	0.0327418	NO
1st-C57_S42	4630906	0.887792	0.0323056	NO
1st-C58_S76	3626263	0.887507	0.139518	NO
1st-C59_S77	4571185	0.901388	0.0211237	NO
1st-C5_S57	3121210	0.907951	0.034281	NO
1st-C60_S78	4760366	0.893076	0.0493202	NO
1st-C62_S35	4897936	0.923005	0.110939	NO
1st-C64_S79	4622500	0.867418	0.0699166	NO
1st-C65_S80	4844050	0.887615	0.0524458	NO
1st-C66_S81	5644260	0.899491	0.0489805	NO
1st-C68_S36	4026498	0.875479	0.0300532	NO
1st-C69_S44	3303669	0.866902	0.0880302	NO
1st-C70_S82	3283765	0.888566	0.0596539	NO
1st-C71_S83	3645381	0.873476	0.0486622	NO
1st-C73_S45	4149270	0.884334	0.0316326	NO
1st-C74_S37	3072735	0.893295	0.0456331	NO
1st-C75_S29	3856443	0.881832	0.0581473	NO
1st-C76_S87	4799727	0.895125	0.0730823	NO
1st-C77_S86	4081058	0.898658	0.0388058	NO
1st-C78_S85	3425617	0.873959	0.0416661	NO
1st-C79_S46	3707373	0.909922	0.139345	NO
1st-C80_S38	3856945	0.871768	0.0458454	NO
1st-C81_S30	3849959	0.876077	0.0576217	NO
1st-C83_S89	3883486	0.884976	0.0527738	NO
1st-C88_S93	4996738	0.893798	0.0768438	NO
1st-C89_S92	4094559	0.866285	0.0396883	NO
1st-C8_S10	3866640	0.904377	0.139833	NO
1st-C90_S91	3730227	0.885283	0.10487	NO
1st-C91_S48	3821683	0.896372	0.0431024	NO
1st-C94_S96	2927877	0.883742	0.0880153	NO
1st-C95_S95	4558797	0.898679	0.0468169	NO
1st-C96_S94	3197833	0.917902	0.188016	NO
2nd-61_S28	5164695	0.94202	0.0417125	NO
2nd-C10_S21	4683575	0.899921	0.0486613	NO
2nd-C11_S20	4618001	0.886517	0.0434757	NO
2nd-C12_S19	4320824	0.905223	0.0658379	NO
2nd-C13_S27	4728728	0.878251	0.0662168	NO
2nd-C14_S26	4417384	0.956127	0.194661	NO
2nd-C15_S25	4664205	0.881108	0.120743	NO
2nd-C16_S33	5297231	0.888645	0.0398878	NO
2nd-C17_S32	3237028	0.879494	0.207222	NO
2nd-C18_S31	3831141	0.88995	0.109445	NO
2nd-C19_S39	3826079	0.923583	0.193497	NO
2nd-C1_S3	4263091	0.904906	0.167133	NO
2nd-C20_S38	3588594	0.892906	0.0437331	NO
2nd-C21_S37	2938015	0.898746	0.104613	NO
2nd-C24_S43	3519449	0.892664	0.0958225	NO
2nd-C25_S49	4022118	0.859269	0.22695	NO
2nd-C26_S50	4112750	0.887883	0.0368118	NO
2nd-C27_S51	5301658	0.928149	0.135049	NO
2nd-C28_S55	3784481	0.898734	0.0694232	NO
2nd-C29_S56	3408971	0.880756	0.0925605	NO
2nd-C2_S2	4554404	0.930361	0.0172115	NO
2nd-C31_S61	3166893	0.86451	0.0459744	NO
2nd-C32_S62	4594510	0.903428	0.168503	NO
2nd-C33_S63	4586475	0.905848	0.0771541	NO
2nd-C36_S69	3515064	0.898812	0.0438432	NO
2nd-C37_S73	3949386	0.944321	0.234317	NO
2nd-C38_S74	3495648	0.896889	0.167594	NO
2nd-C39_S75	4465292	0.887218	0.0477005	NO
2nd-C3_S1	3147708	0.898266	0.00641452	NO
2nd-C42_S81	4220693	0.893434	0.0428452	NO
2nd-C47_S92	4092304	0.87728	0.0538094	NO
2nd-C49_S4	2899696	0.919117	0.0737437	NO
2nd-C4_S9	3983134	0.901744	0.130835	NO
2nd-C51_S6	3231885	0.919835	0.141215	NO
2nd-C52_S10	4579870	0.918345	0.0701497	NO
2nd-C53_S11	4241136	0.886279	0.0233897	NO
2nd-C54_S12	3484049	0.874877	0.103464	NO
2nd-C55_S16	4340055	0.921899	0.0229557	NO
2nd-C56_S17	1982598	0.910311	0.074627	NO
2nd-C57_S18	3571891	0.870512	0.127752	NO
2nd-C58_S22	4563120	0.898329	0.0237466	NO
2nd-C5_S8	4053092	0.917797	0.140499	NO
2nd-C60_S24	4950870	0.879942	0.232889	NO
2nd-C62_S29	4427575	0.88445	0.16001	NO
2nd-C63_S30	4007807	0.893305	0.0892644	NO
2nd-C64_S34	4231372	0.878597	0.118556	NO
2nd-C66_S36	3605484	0.871061	0.0581026	NO
2nd-C67_S40	3335231	0.891046	0.0385968	NO
2nd-C68_S41	2345007	0.884397	0.0304614	NO
2nd-C69_S42	1902861	0.885051	0.0337764	NO
2nd-C6_S7	3236245	0.88281	0.0793284	NO
2nd-C70_S46	2993345	0.885239	0.084352	NO
2nd-C71_S47	3128908	0.875865	0.0664874	NO
2nd-C72_S48	3042669	0.868402	0.14117	NO
2nd-C74_S53	3686991	0.873632	0.0801067	NO
2nd-C75_S52	4345674	0.882687	0.0362703	NO
2nd-C76_S60	4519477	0.875816	0.279659	NO
2nd-C77_S59	4653926	0.898212	0.0336638	NO
2nd-C79_S66	3741382	0.888513	0.0707762	NO
2nd-C7_S15	4759923	0.928816	0.150379	NO
2nd-C80_S65	5083596	0.88038	0.064948	NO
2nd-C81_S64	3440576	0.874475	0.267245	NO
2nd-C82_S72	5088741	0.896411	0.0478785	NO
2nd-C83_S71	4272681	0.911013	0.145793	NO
2nd-C86_S77	4090878	0.923564	0.136474	NO
2nd-C87_S76	2531785	0.885071	0.0919568	NO
2nd-C88_S84	3842843	0.894948	0.192929	NO
2nd-C89_S83	4073740	0.892531	0.048811	NO
2nd-C8_S14	4492570	0.903341	0.0296441	NO
2nd-C90_S82	4294067	0.899129	0.0302163	NO
2nd-C92_S89	4136268	0.880494	0.0383441	NO
2nd-C93_S88	4150431	0.900098	0.101711	NO
2nd-C94_S96	2818927	0.899758	0.181902	NO
2nd-C95_S95	4451201	0.902796	0.100481	NO
3rd-C10_S37	3027724	0.886055	0.0644327	NO
3rd-C11_S58	5441379	0.901791	0.141777	NO
3rd-C12_S68	4654048	0.893474	0.061096	NO
3rd-C13_S43	4365723	0.897093	0.0844103	NO
3rd-C14_S21	4036673	0.894371	0.130182	NO
3rd-C16_S49	3901059	0.908291	0.0376332	NO
3rd-C17_S70	3166213	0.882471	0.0403709	NO
3rd-C18_S80	2369134	0.883999	0.0378357	NO
3rd-C19_S47	3010772	0.863051	0.0834937	NO
3rd-C1_S39	3457040	0.885609	0.275529	NO
3rd-C20_S22	4006718	0.841566	0.100124	NO
3rd-C21_S11	3377626	0.886569	0.111334	NO
3rd-C23_S94	2976490	0.896822	0.110657	NO
3rd-C25_S15	3179157	0.899012	0.0934091	NO
3rd-C26_S28	3152659	0.885118	0.146555	NO
3rd-C27_S49	2902010	0.873179	0.0427099	NO
3rd-C2_S16	3458546	0.888158	0.0380112	NO
3rd-C31_S55	2782758	0.895302	0.898859	NO
3rd-C32_S31	2737378	0.904753	0.0733224	NO
3rd-C33_S50	4672227	0.896743	0.129628	NO
3rd-C34_S45	2451796	0.902063	0.0920828	NO
3rd-C35_S23	4894746	0.91841	0.100318	NO
3rd-C36_S2	4912492	0.902792	0.130283	NO
3rd-C37_S67	1704964	0.893198	0.446281	NO
3rd-C3_S2	3680734	0.917074	0.00855307	NO
3rd-C40_S57	3939604	0.905044	0.171674	NO
3rd-C42_S74	3362676	0.898176	0.20911	NO
3rd-C44_S32	4100233	0.9133	0.0453249	NO
3rd-C46_S93	2487271	0.874046	0.15396	NO
3rd-C47_S35	3661381	0.872177	0.084682	NO
3rd-C49_S60	3089285	0.891388	0.026999	NO
3rd-C4_S25	5442479	0.908169	0.0997917	NO
3rd-C51_S87	4122734	0.93518	0.00591004	NO
3rd-C52_S86	3859756	0.922174	0.0877447	NO
3rd-C53_S67	4573300	0.887208	0.0595024	NO
3rd-C54_S93	4451648	0.915858	0.119625	NO
3rd-C55_S62	4285080	0.88612	0.0541745	NO
3rd-C56_S90	4675640	0.923616	0.171295	NO
3rd-C57_S5	4526965	0.88297	0.0515042	NO
3rd-C58_S3	5275399	0.89833	0.177397	NO
3rd-C59_S91	4752320	0.904376	0.161987	NO
3rd-C5_S68	2580553	0.881675	0.782741	NO
3rd-C60_S10	4577159	0.937692	0.0847887	NO
3rd-C61_S64	4432909	0.913485	0.0154154	NO
3rd-C63_S54	3695000	0.903383	0.0228654	NO
3rd-C65_S20	4137661	0.911981	0.108247	NO
3rd-C67_S69	3273839	0.885044	0.0481894	NO
3rd-C68_S13	2393702	0.865615	0.0628793	NO
3rd-C69_S78	2511020	0.891393	0.0357029	NO
3rd-C6_S44	2717318	0.896632	0.0368573	NO
3rd-C71_S80	4268429	0.900789	0.132187	NO
3rd-C73_S90	3026582	0.896683	0.11642	NO
3rd-C75_S73	2283903	0.937771	0.00830871	NO
3rd-C76_S22	3122232	0.87703	0.0736945	NO
3rd-C77_S92	3476892	0.90536	0.026689	NO
3rd-C78_S27	4249769	0.878461	0.0878972	NO
3rd-C79_S67	4134004	0.884008	0.0568282	NO
3rd-C7_S40	2555856	0.897381	0.0270146	NO
3rd-C82_S11	3912107	0.860585	0.101355	NO
3rd-C84_S75	5639817	0.886209	0.137398	NO
3rd-C85_S79	5249805	0.90041	0.0334689	NO
3rd-C85_S83	2438378	0.880016	0.030615	NO
3rd-C86_S85	1868264	0.856608	0.0942251	NO
3rd-C87_S88	1971858	0.856098	0.21599	NO
3rd-C88_S24	5931638	0.888469	0.143079	NO
3rd-C89_S21	5012115	0.90686	0.0699208	NO
3rd-C8_S18	3985617	0.892887	0.0610415	NO
3rd-C90_S16	4896571	0.893366	0.0273682	NO
3rd-C91_S91	4451509	0.883591	0.0324309	NO
3rd-C92_S86	3957101	0.903543	0.146553	NO
3rd-C93_S84	3362550	0.893875	0.0367471	NO
3rd-C94_S48	4446811	0.908467	0.00522478	NO
3rd-C95_S81	3193133	0.88941	0.036153	NO
3rd-C96_S79	2343526	0.890327	0.106582	NO
3rd-C9_S5	3748150	0.89439	0.0212929	NO
4th-61_S28	4395734	0.876706	0.0892102	NO
4th-C12_S19	3660514	0.878238	0.0414584	NO
4th-C14_S26	3131169	0.893325	0.108846	NO
4th-C16_S33	3566613	0.878057	0.199675	NO
4th-C17_S32	4895763	0.887752	0.217487	NO
4th-C18_S31	3214620	0.888424	0.0327255	NO
4th-C19_S39	2966199	0.886915	0.0896102	NO
4th-C20_S38	2609933	0.890183	0.0682833	NO
4th-C22_S45	2624661	0.902316	0.153043	NO
4th-C23_S44	2299550	0.881591	0.0784492	NO
4th-C24_S43	3474097	0.884352	0.0647324	NO
4th-C26_S50	3222423	0.885171	0.102124	NO
4th-C27_S51	2993760	0.89554	0.16425	NO
4th-C28_S55	3285446	0.867326	0.101301	NO
4th-C29_S56	3008754	0.871488	0.0388132	NO
4th-C30_S57	474915	0.896071	0.086452	NO
4th-C31_S61	3667927	0.899635	0.0599793	NO
4th-C32_S62	3541998	0.876249	0.133419	NO
4th-C33_S63	3197893	0.882245	0.124824	NO
4th-C35_S68	3059705	0.914299	0.159474	NO
4th-C36_S69	3258671	0.893006	0.0313276	NO
4th-C37_S73	4889508	0.907183	0.126235	NO
4th-C3_S1	3241422	0.905987	0.0249859	NO
4th-C40_S79	3527022	0.889848	0.095316	NO
4th-C43_S85	2663928	0.854449	0.28602	NO
4th-C45_S87	4474452	0.932091	0.125172	NO
4th-C49_S4	2517513	0.866947	0.103065	NO
4th-C4_S9	3881140	0.887815	0.0455291	NO
4th-C50_S5	3676494	0.901736	0.0336923	NO
4th-C51_S6	3647795	0.899468	0.0407873	NO
4th-C54_S12	2136457	0.886271	0.0209938	NO
4th-C56_S17	4962377	0.911475	0.0523571	NO
4th-C57_S18	4847189	0.915361	0.0109399	NO
4th-C59_S23	3850823	0.865934	0.0553592	NO
4th-C5_S8	3590586	0.868251	0.0836797	NO
4th-C62_S29	4950319	0.88014	0.0557289	NO
4th-C63_S30	4531684	0.891209	0.00702915	NO
4th-C64_S34	3904457	0.878947	0.0400028	NO
4th-C65_S35	4678093	0.882831	0.0337971	NO
4th-C66_S36	4747836	0.876758	0.0709731	NO
4th-C67_S40	3648976	0.901866	0.090561	NO
4th-C68_S41	1737062	0.904442	0.0296248	NO
4th-C69_S42	2838504	0.895476	0.00483934	NO
4th-C6_S7	2382548	0.88378	0.050829	NO
4th-C70_S46	3447584	0.881976	0.0086751	NO
4th-C71_S47	689870	0.879769	0.0694102	NO
4th-C73_S54	4544083	0.893923	0.0586733	NO
4th-C74_S53	3650821	0.935274	0.178636	NO
4th-C75_S52	3858126	0.889681	0.0616735	NO
4th-C76_S60	4147751	0.871949	0.0671405	NO
4th-C77_S59	4003926	0.899052	0.0662245	NO
4th-C78_S58	3544596	0.883163	0.0162635	NO
4th-C79_S66	3472901	0.882879	0.0456012	NO
4th-C7_S15	3220778	0.885847	0.115126	NO
4th-C80_S65	3191381	0.880445	0.0451883	NO
4th-C81_S64	3950085	0.888877	0.0851618	NO
4th-C82_S72	5066352	0.86749	0.029854	NO
4th-C83_S71	3878543	0.893666	0.0270299	NO
4th-C84_S70	3676605	0.88258	0.0788992	NO
4th-C85_S78	4786726	0.869611	0.0221407	NO
4th-C86_S77	3237845	0.883081	0.0542194	NO
4th-C87_S76	2763156	0.867109	0.0896044	NO
4th-C88_S84	3752375	0.886034	0.0510961	NO
4th-C89_S83	3421041	0.868405	0.0957641	NO
4th-C8_S14	3058372	0.885082	0.208133	NO
4th-C90_S82	2609270	0.889241	0.0811739	NO
4th-C91_S90	3908806	0.872592	0.0817352	NO
4th-C92_S89	3268041	0.87301	0.0424677	NO
4th-C93_S88	4534002	0.910772	0.0707512	NO
4th-C94_S96	4429477	0.914079	0.0306207	NO
4th-C95_S95	3181469	0.876605	0.053762	NO
4th-C96_S94	3321964	0.887877	0.0431664	NO
4th-C9_S13	3945479	0.906446	0.0642164	NO
5th-61_S99	4600581	0.88824	0.112592	NO
5th-C10_S92	3587521	0.938351	0.037876	NO
5th-C11_S91	3560592	0.928034	0.0107222	NO
5th-C12_S90	2411587	0.865561	0.367702	NO
5th-C13_S98	4965684	0.895814	0.0759272	NO
5th-C14_S97	4174029	0.944849	0.164957	NO
5th-C16_S98	3366837	0.899387	0.0845232	NO
5th-C17_S97	3231163	0.905207	0.0868301	NO
5th-C18_S96	2252958	0.917576	0.0129842	NO
5th-C19_S104	3920665	0.908843	0.0519023	NO
5th-C1_S88	5701909	0.86906	0.0851563	NO
5th-C20_S103	4077566	0.880409	0.124503	NO
5th-C21_S102	4335658	0.863235	0.0485385	NO
5th-C22_S102	2846465	0.849909	0.106705	NO
5th-C25_S108	4183423	0.930148	0.167907	NO
5th-C26_S109	5585209	0.91607	0.0332488	NO
5th-C29_S104	3350193	0.856019	0.183971	NO
5th-C2_S87	5175378	0.880246	0.0940392	NO
5th-C30_S105	3570451	0.894911	0.0361111	NO
5th-C31_S112	3432151	0.91847	0.0882628	NO
5th-C32_S113	5010204	0.95441	0.105013	NO
5th-C33_S114	4488912	0.925362	0.182967	NO
5th-C34_S108	3862996	0.872265	0.063759	NO
5th-C35_S109	3092665	0.87802	0.0934033	NO
5th-C39_S118	4087238	0.887292	0.105561	NO
5th-C40_S112	2554171	0.894445	0.0356226	NO
5th-C41_S113	1873866	0.848528	0.254996	NO
5th-C42_S114	3487363	0.934954	0.0413712	NO
5th-C43_S121	3580755	0.903186	0.210941	NO
5th-C44_S122	3811063	0.900511	0.088428	NO
5th-C45_S123	4457001	0.92844	0.131401	NO
5th-C47_S118	2002869	0.872164	0.0470985	NO
5th-C49_S89	4912164	0.872044	0.189752	NO
5th-C4_S86	988359	0.833184	0.0625814	NO
5th-C50_S90	4510561	0.884781	0.0606194	NO
5th-C51_S91	4228867	0.87339	0.0107178	NO
5th-C52_S87	3874929	0.949562	0.0156373	NO
5th-C53_S88	3306273	0.925789	0.0433381	NO
5th-C54_S89	4411144	0.903951	0.0417935	NO
5th-C55_S94	4403236	0.913497	0.0898369	NO
5th-C56_S95	4080336	0.924379	0.0386075	NO
5th-C57_S96	4031911	0.870892	0.0829408	NO
5th-C58_S93	3712359	0.917551	0.125237	NO
5th-C59_S94	3893918	0.874247	0.0264819	NO
5th-C5_S85	4291566	0.868211	0.0987586	NO
5th-C60_S95	2950201	0.883351	0.574823	NO
5th-C62_S100	4616914	0.917904	0.112169	NO
5th-C63_S101	5146410	0.926564	0.0493423	NO
5th-C64_S99	3813571	0.866624	0.143053	NO
5th-C65_S100	3414869	0.911774	0.0454458	NO
5th-C66_S101	3730768	0.869126	0.0597431	NO
5th-C67_S105	5126831	0.938802	0.0199224	NO
5th-C68_S106	4458012	0.870324	0.0423362	NO
5th-C69_S107	4571127	0.857659	0.0702407	NO
5th-C6_S84	3599530	0.883544	0.00484624	NO
5th-C70_S103	3873383	0.912999	0.0669828	NO
5th-C73_S111	4465819	0.929513	0.0492625	NO
5th-C74_S110	3969926	0.860276	0.0584868	NO
5th-C77_S107	3042931	0.879496	0.0503251	NO
5th-C78_S106	4199787	0.862412	0.0754334	NO
5th-C79_S117	5214238	0.878007	0.0953939	NO
5th-C7_S93	5360696	0.881381	0.0584367	NO
5th-C80_S116	4720119	0.908576	0.237841	NO
5th-C81_S115	5561746	0.926502	0.036598	NO
5th-C83_S111	2150371	0.880585	0.0276809	NO
5th-C84_S110	4611437	0.881067	0.0756804	NO
5th-C86_S120	3660821	0.906048	0.0426863	NO
5th-C87_S119	3228310	0.897862	0.053968	NO
5th-C88_S117	3957310	0.947596	0.0779766	NO
5th-C89_S116	3991425	0.947343	0.0165475	NO
5th-C90_S115	3997106	0.900001	0.089098	NO
5th-C92_S124	4173838	0.878776	0.0432304	NO
5th-C94_S121	3397533	0.889983	0.0272813	NO
5th-C95_S120	3507613	0.884518	0.0768198	NO
5th-C96_S119	3109839	0.879955	0.0649559	NO
5th-C9_S92	4750136	0.863728	0.0684168	NO
6th-61_S24	3702033	0.904152	0.120841	NO
6th-C11_S19	3774361	0.872637	0.0702726	NO
6th-C12_S18	4183924	0.872803	0.117243	NO
6th-C14_S23	2682043	0.928323	0.961543	NO
6th-C15_S22	3417521	0.960387	0.157656	NO
6th-C16_S29	4014936	0.861169	0.125307	NO
6th-C17_S28	2573809	0.9508	0.993052	NO
6th-C18_S27	3630224	0.888634	0.0993648	NO
6th-C19_S35	3781166	0.886734	0.239034	NO
6th-C1_S3	3962606	0.929242	0.212154	NO
6th-C20_S34	3665488	0.880542	0.229411	NO
6th-C21_S33	3583670	0.864369	0.131057	NO
6th-C22_S39	3688875	0.886419	0.193339	NO
6th-C23_S38	3708587	0.876864	0.174937	NO
6th-C24_S37	4125209	0.876352	0.100323	NO
6th-C25_S43	4468157	0.912882	0.227935	NO
6th-C26_S44	2643866	0.940975	0.967033	NO
6th-C27_S45	2948170	0.953313	0.920958	NO
6th-C28_S49	4201787	0.915929	0.113167	NO
6th-C29_S50	4174228	0.874531	0.225637	NO
6th-C2_S2	3955337	0.908023	0.14396	NO
6th-C30_S51	4563956	0.887275	0.205525	NO
6th-C32_S56	3969579	0.875417	0.100843	NO
6th-C33_S57	3118768	0.868494	0.557228	NO
6th-C34_S61	2755574	0.899499	0.210295	NO
6th-C35_S62	3663448	0.915212	0.148822	NO
6th-C36_S63	3960247	0.867973	0.128697	NO
6th-C39_S69	1321970	0.942203	0.949957	NO
6th-C3_S1	3277791	0.902321	0.133536	NO
6th-C40_S73	2970166	0.880492	0.159068	NO
6th-C41_S74	2662349	0.889228	0.265195	NO
6th-C42_S75	2783490	0.880486	0.182642	NO
6th-C44_S80	1844558	0.87228	0.756931	NO
6th-C45_S81	2472434	0.868499	0.204223	NO
6th-C46_S85	1805380	0.947839	0.970308	NO
6th-C49_S4	3252424	0.938539	0.0209862	NO
6th-C4_S9	4446282	0.881178	0.0574642	NO
6th-C50_S5	3620737	0.88347	0.087333	NO
6th-C51_S6	3895110	0.89235	0.124024	NO
6th-C53_S10	2898114	0.886877	0.526355	NO
6th-C54_S11	5052776	0.873469	0.132741	NO
6th-C55_S15	3744705	0.908994	0.0802811	NO
6th-C56_S16	3557083	0.868364	0.132336	NO
6th-C57_S17	3581586	0.945356	0.218655	NO
6th-C58_S20	4273426	0.929921	0.275632	NO
6th-C59_S21	4096230	0.873226	0.0943402	NO
6th-C5_S8	3720058	0.872859	0.0862503	NO
6th-C62_S25	3286714	0.911432	0.106799	NO
6th-C63_S26	4292670	0.871778	0.0966474	NO
6th-C64_S30	3737765	0.943579	0.204124	NO
6th-C65_S31	4023809	0.862539	0.052447	NO
6th-C66_S32	3641364	0.866932	0.127168	NO
6th-C67_S36	3258051	0.884352	0.133932	NO
6th-C6_S7	4473988	0.885838	0.05167	NO
6th-C70_S40	4229883	0.856631	0.0824633	NO
6th-C71_S41	3898704	0.862254	0.102297	NO
6th-C72_S42	3750899	0.903847	0.181379	NO
6th-C73_S48	3835186	0.880946	0.108802	NO
6th-C74_S47	3618683	0.942424	0.252829	NO
6th-C75_S46	3738827	0.89853	0.101583	NO
6th-C76_S54	3856332	0.862667	0.0958984	NO
6th-C77_S53	4824127	0.884121	0.121847	NO
6th-C78_S52	4048234	0.879412	0.0573537	NO
6th-C79_S60	3794510	0.858113	0.138276	NO
6th-C7_S14	3407172	0.863454	0.0951916	NO
6th-C80_S59	3506895	0.874921	0.126156	NO
6th-C81_S58	3591134	0.903345	0.0791593	NO
6th-C82_S66	3014225	0.934118	0.181302	NO
6th-C83_S65	3242573	0.873903	0.0445149	NO
6th-C84_S64	3913965	0.934778	0.150969	NO
6th-C85_S72	3721204	0.855218	0.123392	NO
6th-C86_S71	3050309	0.938185	0.20919	NO
6th-C87_S70	3853079	0.875992	0.177962	NO
6th-C88_S78	3883288	0.906479	0.162081	NO
6th-C89_S77	4093643	0.919482	0.150373	NO
6th-C8_S13	2386327	0.908853	0.076179	NO
6th-C90_S76	3667173	0.927518	0.235283	NO
6th-C91_S84	2558627	0.862333	0.0628502	NO
6th-C93_S82	3070635	0.858426	0.0787903	NO
6th-C96_S86	2350355	0.893301	0.144034	NO
6th-C9_S12	2099274	0.885057	0.0551965	NO
7th-C10_S19	4829011	0.908072	0.132645	NO
7th-C11_S18	4250295	0.881067	0.0744579	NO
7th-C12_S17	3841159	0.907722	0.199486	NO
7th-C13_S25	4372080	0.895256	0.156898	NO
7th-C14_S24	4115595	0.877177	0.0929827	NO
7th-C15_S23	3473550	0.868418	0.147793	NO
7th-C16_S30	2784222	0.956705	0.950957	NO
7th-C17_S29	4686289	0.869957	0.0200893	NO
7th-C18_S28	4232538	0.892538	0.116665	NO
7th-C19_S36	3446581	0.946228	0.165338	NO
7th-C1_S3	3319449	0.951533	0.165386	NO
7th-C20_S35	3625457	0.934922	0.168802	NO
7th-C21_S34	3413003	0.941719	0.299923	NO
7th-C23_S41	4144009	0.886298	0.190817	NO
7th-C24_S40	4043214	0.854551	0.148762	NO
7th-C25_S43	4924635	0.899223	0.16591	NO
7th-C26_S44	3350991	0.957622	0.940552	NO
7th-C27_S45	2962068	0.947327	0.883612	NO
7th-C28_S48	5106896	0.925565	0.146365	NO
7th-C29_S49	4287024	0.918969	0.112872	NO
7th-C2_S2	3057302	0.899158	0.201448	NO
7th-C30_S50	3608415	0.958334	0.949403	NO
7th-C31_S53	2825224	0.879888	0.13439	NO
7th-C32_S54	4159850	0.883305	0.155309	NO
7th-C33_S55	3596629	0.870559	0.232496	NO
7th-C34_S59	4562855	0.879056	0.0729949	NO
7th-C35_S60	4288255	0.887723	0.101185	NO
7th-C36_S61	4765010	0.888616	0.0889346	NO
7th-C37_S65	4372326	0.883852	0.141678	NO
7th-C38_S66	3949834	0.874713	0.0683929	NO
7th-C3_S1	2772110	0.906492	0.0836973	NO
7th-C40_S70	2939562	0.887462	0.225651	NO
7th-C41_S71	2299441	0.897817	0.130316	NO
7th-C42_S72	3530038	0.955718	0.982246	NO
7th-C44_S76	2532175	0.870652	0.188196	NO
7th-C45_S77	4205119	0.877281	0.144913	NO
7th-C46_S80	3106031	0.88113	0.0884736	NO
7th-C47_S81	1902516	0.937418	0.722345	NO
7th-C49_S4	3046721	0.892913	0.0939078	NO
7th-C4_S8	3435327	0.904143	0.0746301	NO
7th-C50_S5	4096729	0.891731	0.249614	NO
7th-C51_S6	3718945	0.888748	0.0935054	NO
7th-C52_S9	3936454	0.922284	0.16401	NO
7th-C53_S10	4099383	0.883163	0.14093	NO
7th-C54_S11	3466546	0.910272	0.216781	NO
7th-C55_S14	3288449	0.956844	0.995131	NO
7th-C56_S15	3558199	0.875241	0.577891	NO
7th-C57_S16	3793614	0.904249	0.158943	NO
7th-C58_S20	5001198	0.871056	0.11962	NO
7th-C59_S21	4811103	0.875745	0.144692	NO
7th-C5_S7	2731710	0.882265	0.781708	NO
7th-C60_S22	4742309	0.941353	0.142149	NO
7th-C61_S26	4779150	0.894617	0.070264	NO
7th-C62_S27	4656731	0.875119	0.174368	NO
7th-C64_S31	5194741	0.885592	0.18757	NO
7th-C65_S32	4466028	0.954348	0.174578	NO
7th-C66_S33	3428045	0.865654	0.134688	NO
7th-C67_S37	3700616	0.919113	0.0306493	NO
7th-C68_S38	4305019	0.870166	0.410902	NO
7th-C69_S39	3769347	0.876707	0.0677648	NO
7th-C72_S42	2635965	0.863168	0.0889795	NO
7th-C73_S47	4101190	0.903092	0.143005	NO
7th-C75_S46	5307666	0.888668	0.103354	NO
7th-C76_S52	5594217	0.95082	0.0818746	NO
7th-C77_S51	5232110	0.885812	0.181268	NO
7th-C79_S58	4244574	0.891565	0.0691354	NO
7th-C80_S57	4521054	0.915786	0.0911064	NO
7th-C81_S56	3301124	0.91948	0.421907	NO
7th-C82_S64	4105518	0.848555	0.0492863	NO
7th-C83_S63	4554606	0.887796	0.05561	NO
7th-C84_S62	4763227	0.868957	0.108808	NO
7th-C85_S69	2234787	0.907635	0.0558762	NO
7th-C86_S68	4518777	0.885995	0.103382	NO
7th-C87_S67	4296526	0.889503	0.0847245	NO
7th-C88_S75	4107179	0.860149	0.382019	NO
7th-C89_S74	3339175	0.901923	0.209807	NO
7th-C8_S13	4804348	0.897269	0.134532	NO
7th-C90_S73	3452435	0.879997	0.132646	NO
7th-C91_S79	2526299	0.881654	0.156298	NO
7th-C92_S78	2815030	0.882907	0.0996872	NO
7th-C94_S83	3769739	0.935817	0.255323	NO
7th-C96_S82	4538070	0.872852	0.118354	NO
7th-C9_S12	4280871	0.881238	0.103106	NO
8th-C10_S100	2814106	0.897037	0.108599	NO
8th-C11_S99	2619646	0.880721	0.0418826	NO
8th-C13_S106	2735063	0.878793	0.0975168	NO
8th-C14_S105	2541028	0.886444	0.0513329	NO
8th-C15_S104	2992578	0.870681	0.0692738	NO
8th-C16_S111	2475003	0.883155	0.026342	NO
8th-C18_S110	1794356	0.943647	0.472513	NO
8th-C20_S116	2878587	0.88024	0.0470951	NO
8th-C21_S115	2519415	0.897519	0.0458023	NO
8th-C22_S122	2837451	0.889808	0.152662	NO
8th-C23_S121	2689884	0.929907	0.0843187	NO
8th-C24_S120	3132458	0.89299	0.166461	NO
8th-C25_S125	1666144	0.955012	0.96884	NO
8th-C26_S126	1240523	0.853198	0.0520636	NO
8th-C27_S127	2902517	0.922939	0.101623	NO
8th-C28_S131	3278085	0.924702	0.0785423	NO
8th-C29_S132	1989112	0.887777	0.326491	NO
8th-C2_S85	2880124	0.88188	0.0232094	NO
8th-C30_S133	3235926	0.888048	0.057218	NO
8th-C31_S136	2943997	0.930857	0.0939395	NO
8th-C33_S137	1578316	0.948025	0.974065	NO
8th-C34_S141	3104088	0.878389	0.100892	NO
8th-C35_S142	2607847	0.906321	0.0715438	NO
8th-C37_S146	3073860	0.912276	0.0916525	NO
8th-C38_S147	1579751	0.9338	0.168765	NO
8th-C3_S84	3501376	0.892304	0.0625772	NO
8th-C42_S151	2922086	0.890241	0.0771419	NO
8th-C44_S155	2642643	0.894273	0.103395	NO
8th-C46_S159	112421	0.90124	0.134866	NO
8th-C47_S160	1983121	0.927025	0.194301	NO
8th-C49_S86	3049799	0.885849	0.14668	NO
8th-C4_S90	2361708	0.887146	0.012884	NO
8th-C51_S87	2731635	0.882213	0.112545	NO
8th-C52_S91	2666978	0.877485	0.0931951	NO
8th-C54_S92	3226179	0.891064	0.110235	NO
8th-C55_S96	2598525	0.879232	0.0816632	NO
8th-C56_S97	2802624	0.872691	0.0522866	NO
8th-C57_S98	2518336	0.891956	0.0397334	NO
8th-C58_S101	2638247	0.874625	0.0720262	NO
8th-C59_S102	2866822	0.871221	0.0536144	NO
8th-C5_S89	2427496	0.876467	0.128685	NO
8th-C60_S103	3087252	0.914896	0.165932	NO
8th-C61_S107	2544152	0.874342	0.0795372	NO
8th-C62_S108	2794338	0.886942	0.114625	NO
8th-C63_S109	2379293	0.883681	0.0458362	NO
8th-C64_S112	3076337	0.881396	0.0471425	NO
8th-C65_S113	2575320	0.88642	0.106756	NO
8th-C66_S114	2182372	0.872947	0.14184	NO
8th-C67_S117	3096574	0.904969	0.050241	NO
8th-C68_S118	3203123	0.876516	0.0558725	NO
8th-C69_S119	1869878	0.903059	0.276799	NO
8th-C6_S88	2834014	0.868125	0.178346	NO
8th-C70_S123	3068622	0.935663	0.247647	NO
8th-C72_S124	2801501	0.873464	0.137264	NO
8th-C73_S130	2865837	0.877787	0.0915058	NO
8th-C74_S129	3352453	0.894682	0.0581232	NO
8th-C75_S128	1569139	0.917634	0.132791	NO
8th-C76_S135	2468089	0.894788	0.096265	NO
8th-C78_S134	2898751	0.906588	0.0468428	NO
8th-C79_S140	2758857	0.914806	0.100962	NO
8th-C7_S95	2431442	0.878075	0.081323	NO
8th-C80_S139	3336418	0.906695	0.0596256	NO
8th-C81_S138	3342191	0.884863	0.0840926	NO
8th-C82_S145	2748565	0.883013	0.0785801	NO
8th-C83_S144	2958857	0.884759	0.0726046	NO
8th-C84_S143	3000437	0.924902	0.123761	NO
8th-C85_S150	2779496	0.88686	0.043706	NO
8th-C86_S149	2911730	0.895932	0.0873921	NO
8th-C87_S148	3010310	0.89761	0.143932	NO
8th-C88_S154	2440596	0.881624	0.106283	NO
8th-C89_S153	2142823	0.913765	0.0325524	NO
8th-C8_S94	2207497	0.893387	0.132297	NO
8th-C90_S152	2885227	0.921171	0.0522258	NO
8th-C91_S158	2251868	0.90497	0.0635726	NO
8th-C92_S157	2463569	0.860285	0.0653177	NO
8th-C93_S156	2927211	0.919207	0.0333722	NO
8th-C94_S162	2305108	0.921369	0.0407761	NO
8th-C95_S161	2227335	0.886997	0.0380751	NO
8th-C9_S93	3093373	0.885938	0.0911165	NO
9th-C10_S107	1469407	0.882024	0.171417	REPEAT
9th-C10_S18	2787430	0.892327	0.179338	NO
9th-C11_S102	1640381	0.885778	0.189711	REPEAT
9th-C11_S17	2701265	0.896028	0.200209	NO
9th_C13_S16	1616882	0.924941	0.233309	REPEAT
9th-C13_S24	2445349	0.936457	0.245876	NO
9th_C14_S11	1234105	0.903348	0.101802	REPEAT
9th-C14_S23	2160125	0.921118	0.107573	NO
9th-C15_S22	2778941	0.877802	0.116597	NO
9th_C15_S3	1680415	0.855029	0.10526	REPEAT
9th-C16_S108	1430164	0.871587	0.265726	REPEAT
9th-C16_S30	2105317	0.900053	0.298842	NO
9th-C17_S103	1614131	0.875722	0.0465445	REPEAT
9th-C17_S29	2260761	0.898469	0.0512948	NO
9th-C18_S28	1814060	0.889688	0.109399	NO
9th-C18_S95	1603729	0.871307	0.0917074	REPEAT
9th_C19_S17	2126885	0.87567	0.113469	REPEAT
9th-C19_S36	2839657	0.888444	0.11703	NO
9th_C1_S15	1742550	0.890355	0.136004	REPEAT
9th-C1_S3	2509846	0.909488	0.145259	NO
9th_C20_S12	1282042	0.895502	0.0521925	REPEAT
9th-C20_S35	2208751	0.90479	0.0576746	NO
9th-C21_S34	2933112	0.901883	0.119605	NO
9th_C21_S4	1809729	0.889741	0.113539	REPEAT
9th-C22_S109	1616145	0.92167	0.14472	REPEAT
9th-C22_S41	3094728	0.931663	0.138786	NO
9th-C24_S40	3004556	0.898689	0.0901274	NO
9th-C24_S96	1955462	0.881372	0.0866687	REPEAT
9th-C25_S45	2777309	0.930234	0.284085	NO
9th_C25_S5	1673598	0.920078	0.272652	REPEAT
9th_C26_S13	1365357	0.951843	0.963987	REPEAT
9th-C26_S46	1698177	0.951827	0.959438	NO
9th-C28_S50	2462047	0.877798	0.178842	NO
9th-C28_S97	1519381	0.863469	0.166573	REPEAT
9th-C29_S104	1594047	0.878053	0.117528	REPEAT
9th-C29_S51	2461056	0.886794	0.122917	NO
9th-C2_S2	2530857	0.92323	0.0628268	NO
9th_C2_S9	1281830	0.902199	0.0616009	REPEAT
9th-C30_S110	1694900	0.880964	0.145537	REPEAT
9th-C30_S52	3065561	0.894047	0.151862	NO
9th-C31_S54	1729524	0.943067	0.83301	NO
9th_C31_S6	1482308	0.932873	0.822177	REPEAT
9th-C34_S58	1576821	0.945355	0.944256	NO
9th-C34_S98	1027158	0.939541	0.936159	REPEAT
9th-C36_S111	1808002	0.877413	0.0967944	REPEAT
9th-C36_S59	3177653	0.890543	0.0995997	NO
9th-C37_S63	1867296	0.946432	0.920543	NO
9th_C37_S7	1605584	0.944216	0.920331	REPEAT
9th_C38_S14	1661436	0.879899	0.165763	REPEAT
9th-C38_S64	2517717	0.894978	0.17724	NO
9th_C39_S18	1559076	0.909589	0.761515	REPEAT
9th-C39_S65	1952602	0.921567	0.78896	NO
9th_C3_S1	2068702	0.867413	0.0909859	REPEAT
9th-C3_S1	2848674	0.892586	0.100409	NO
9th-C40_S69	2199914	0.881526	0.504404	NO
9th-C40_S99	1530362	0.855867	0.448909	REPEAT
9th-C41_S105	1743146	0.87549	0.158981	REPEAT
9th-C41_S70	2684882	0.891477	0.170085	NO
9th-C43_S74	2048025	0.947321	0.954753	NO
9th_C43_S8	1270625	0.94308	0.951366	REPEAT
9th_C45_S19	1923248	0.892942	0.0719672	REPEAT
9th-C45_S75	2784551	0.906545	0.0747969	NO
9th-C46_S100	1365949	0.885662	0.208035	REPEAT
9th-C46_S79	2610735	0.903596	0.218548	NO
9th-C48_S112	982909	0.940148	0.895767	REPEAT
9th-C48_S80	1681394	0.945589	0.909136	NO
9th_C49_S20	1694957	0.91696	0.0183268	REPEAT
9th-C49_S4	2744919	0.930764	0.0191905	NO
9th-C4_S106	1354418	0.944173	0.0401403	REPEAT
9th-C4_S9	2803822	0.954778	0.0396904	NO
9th_C50_S28	1594557	0.880185	0.152776	REPEAT
9th-C50_S5	2361747	0.893458	0.161204	NO
9th_C51_S35	1800415	0.913596	0.0984	REPEAT
9th-C51_S6	2450510	0.923985	0.0994683	NO
9th-C52_S10	2555702	0.904939	0.0239816	NO
9th-C52_S113	1430774	0.891145	0.0216612	REPEAT
9th-C53_S11	2708762	0.887093	0.0528473	NO
9th-C53_S120	1794961	0.866088	0.0481511	REPEAT
9th-C54_S12	2383150	0.960985	0.986248	NO
9th-C54_S128	1765863	0.957946	0.98202	REPEAT
9th-C55_S15	2659780	0.892095	0.10245	NO
9th_C55_S21	1745230	0.880238	0.0992461	REPEAT
9th-C57_S16	2828526	0.890789	0.0599281	NO
9th_C57_S36	1950363	0.881785	0.0588956	REPEAT
9th-C58_S114	1718973	0.87922	0.0666732	REPEAT
9th-C58_S19	2854481	0.890387	0.0709716	NO
9th-C59_S121	1675830	0.887956	0.0919146	REPEAT
9th-C59_S20	2730967	0.906854	0.0994882	NO
9th-C5_S101	1563236	0.88108	0.0405153	REPEAT
9th-C5_S8	2481006	0.894854	0.0455595	NO
9th-C60_S129	1874337	0.868508	0.0263542	REPEAT
9th-C60_S21	3291945	0.89123	0.0284981	NO
9th_C61_S22	1538790	0.886407	0.0594736	REPEAT
9th-C61_S25	2370518	0.902593	0.0660926	NO
9th-C62_S26	2887719	0.884366	0.0508375	NO
9th_C62_S29	1883967	0.869455	0.0481399	REPEAT
9th-C63_S27	2817180	0.881535	0.0651359	NO
9th_C63_S37	1898866	0.863542	0.0613248	REPEAT
9th-C64_S115	1650627	0.877966	0.141617	REPEAT
9th-C64_S31	2475669	0.904649	0.151701	NO
9th-C65_S122	1492413	0.876119	0.188183	REPEAT
9th-C65_S32	2147789	0.904041	0.210283	NO
9th-C66_S130	1456056	0.874111	0.120217	REPEAT
9th-C66_S33	1962793	0.899417	0.1384	NO
9th_C67_S23	2342602	0.871874	0.0288066	REPEAT
9th-C67_S37	3241502	0.890558	0.0305653	NO
9th_C68_S30	2141053	0.879969	0.0464505	REPEAT
9th-C68_S38	3113223	0.898227	0.0482368	NO
9th_C69_S38	2228127	0.91107	0.0985691	REPEAT
9th-C69_S39	3055340	0.924634	0.102788	NO
9th-C6_S7	2736973	0.909043	0.121442	NO
9th-C6_S94	1513847	0.890972	0.111175	REPEAT
9th-C70_S116	2248280	0.874036	0.151439	REPEAT
9th-C70_S42	3260500	0.894303	0.159786	NO
9th-C71_S123	1906889	0.887674	0.0595948	REPEAT
9th-C71_S43	2471541	0.90139	0.0640392	NO
9th-C72_S131	1787624	0.896067	0.0913317	REPEAT
9th-C72_S44	3165577	0.911777	0.0990522	NO
9th_C73_S39	1277832	0.900648	0.333682	REPEAT
9th-C73_S49	1956120	0.911431	0.356796	NO
9th_C74_S31	2134449	0.876117	0.0574392	REPEAT
9th-C74_S48	3002189	0.891473	0.0603893	NO
9th_C75_S24	2105516	0.925264	0.0248106	REPEAT
9th-C75_S47	2766262	0.932709	0.0247838	NO
9th-C77_S124	1818707	0.866251	0.0769988	REPEAT
9th-C77_S53	2890963	0.882935	0.0826552	NO
9th_C79_S40	1238658	0.903843	0.0395037	REPEAT
9th-C79_S57	1670813	0.920815	0.0437074	NO
9th_C80_S32	1959958	0.884346	0.061131	REPEAT
9th-C80_S56	2898383	0.904049	0.0651837	NO
9th_C81_S25	2137193	0.881623	0.113828	REPEAT
9th-C81_S55	2590089	0.900016	0.121186	NO
9th-C82_S132	1708742	0.872418	0.105863	REPEAT
9th-C82_S62	2910289	0.890895	0.106283	NO
9th-C83_S125	2041788	0.878134	0.0367653	REPEAT
9th-C83_S61	3225381	0.89513	0.0392529	NO
9th-C84_S117	1701875	0.8663	0.0432293	REPEAT
9th-C84_S60	2805501	0.88234	0.0463434	NO
9th_C85_S41	1733732	0.88868	0.0219654	REPEAT
9th-C85_S68	2521624	0.899674	0.0227508	NO
9th_C86_S33	1929784	0.872395	0.119881	REPEAT
9th-C86_S67	2990161	0.885769	0.123211	NO
9th_C87_S26	2213882	0.914615	0.0198339	REPEAT
9th-C87_S66	3131406	0.921099	0.0199549	NO
9th-C88_S133	1866854	0.943651	0.170924	REPEAT
9th-C88_S73	3163094	0.949445	0.182074	NO
9th-C89_S126	1944499	0.865362	0.157102	REPEAT
9th-C89_S72	3077315	0.893556	0.173955	NO
9th_C8_S10	1712885	0.876141	0.156495	REPEAT
9th-C8_S14	2469575	0.900005	0.171155	NO
9th-C90_S118	1664804	0.890889	0.0122728	REPEAT
9th-C90_S71	2862542	0.907076	0.012956	NO
9th_C91_S42	1579990	0.898342	0.150574	REPEAT
9th-C91_S78	2170510	0.909483	0.15801	NO
9th_C92_S34	1659714	0.898091	0.0204571	REPEAT
9th-C92_S77	2557834	0.909035	0.0218668	NO
9th_C93_S27	1841896	0.908652	0.0247135	REPEAT
9th-C93_S76	2679940	0.92026	0.025255	NO
9th-C94_S134	1837675	0.931359	0.184962	REPEAT
9th-C94_S83	2975764	0.93648	0.187866	NO
9th-C95_S127	1868031	0.882999	0.0490332	REPEAT
9th-C95_S82	2956894	0.894917	0.0513917	NO
9th-C96_S119	1494826	0.88161	0.0419265	REPEAT
9th-C96_S81	2455900	0.893073	0.0445142	NO
9th-C9_S13	3031078	0.912166	0.108684	NO
9th_C9_S2	2153099	0.895528	0.102379	REPEAT
