# Supplementary material for: Single-cell transcriptomes identify human islet cell signatures and reveal cell-type–specific expression changes in type 2 diabetes
Source: Genome Res. 2017 Feb;27(2):208–22. doi: 10.1101/gr.212720.116 (PMC5287227; doi:10.1101/gr.212720.116)
Supplement: Supplemental Material [file supp_gr.212720.116_Supplemental_Table_S3.xlsx]

## Sheet: Supplemental_Table_S3
Supplemental_Table_S3: Approximate log2CPM expression thresholds for each marker gene used to assign cell-type identity to each single cell transcriptome sample.
Table containing the marker genes used to classify each of the pancreatic cell types. The approximated log2CPM expression cut-offs were determined using the Gaussian Mixture Model (GMM) approach as shown in Figure 2B. More details about the cell type classification process are provided in the Methods section. CPM = counts per million.
Marker Gene	Cell Type	Approximated Log2CPM Cutoff
PRSS1	Acinar	6.64
GCG	Alpha	14.41
INS	Beta	12.2
SST	Delta	9.62
KRT19	Ductal	4.32
PPY	PP/Gamma	7.56
COL1A1	Stellate	5.91
