# Supplementary material for: Single-cell transcriptomes identify human islet cell signatures and reveal cell-type–specific expression changes in type 2 diabetes
Source: Genome Res. 2017 Feb;27(2):208–22. doi: 10.1101/gr.212720.116 (PMC5287227; doi:10.1101/gr.212720.116)
Supplement: Supplemental Material [file supp_gr.212720.116_Supplemental_Table_S4.xlsx]

## Sheet: NonT2D.genes.selected
Supplemental_Table_S4: Highly expressed genes used for unsupervised hierarchical clustering and t-SNE analysis of single cell sample transcriptomes.
Table containing the respective genes used for unsupervised analyses of non-diabetic, Type 2 diabetic, and combined single cell transcriptome profiles. Each genet set is portrayed on a separate sheet. In each spreadsheet, the corresponding gene annotations are provided as well as the log2(CPM) expression of the gene in each single cell sample. For the expression data, rows represent genes and col…
	Description	Chromosome.Name	Gene.Start..bp.	Gene.End..bp.	Associated.Gene.Name	Gene.Biotype	3rd-C33_S50	1st-C80_S38	3rd-C32_S31	1st-C51_S41	3rd-C7_S40	1st-C59_S77	3rd-C27_S49	1st-C56_S34	1st-C15_S3	1st-C68_S36	1st-C39_S23	1st-C57_S42	1st-C21_S4	1st-C11_S58	1st-C62_S35	3rd-C56_S90	3rd-C67_S69	1st-C69_S44	1st-C42_S71	1st-C20_S12	3rd-C49_S60	1st-C34_S54	3rd-C26_S28	1st-C18_S51	1st-C78_S85	1st-C64_S79	3rd-C21_S11	3rd-C3_S2	1st-61_S27	1st-C58_S76	1st-C50_S33	3rd-C1_S39	1st-C75_S29	1st-C79_S46	3rd-C25_S15	3rd-C9_S5	1st-C8_S10	3rd-C44_S32	1st-C90_S91	1st-C71_S83	3rd-C87_S88	1st-C53_S74	1st-C19_S20
ENSG00000235097	long intergenic non-protein coding RNA 330 [Source:HGNC Symbol;Acc:42047]	13	45373639	45383766	LINC00330	lincRNA	0	0.69678	1.13829	0	1.04167	0.580624	0.870269	0.763909	0	1.06625	0	1.6655	1.33074	0	1.20315	0.44384	0.731368	0	0.284799	0	0.56959	0.736738	1.30314	0	0	2.28349	1.05859	0.486482	1.02361	0.836108	2.49731	1.9523	0.162749	2.10083	0	0	0	0.868022	0	0.817081	0	0.610462	0
ENSG00000155307	SAM domain, SH3 domain and nuclear localization signals 1 [Source:HGNC Symbol;Acc:10528]	21	15857549	15955723	SAMSN1	protein_coding	0	0	0	0	0	0	0	0	0	0	0	0	0	0	0	0	0	0	0	0	0	0	0	0	0	0	0	0	0	0	0	0	0	0	0	0	0	0	0	0	0	0	0
ENSG00000140416	tropomyosin 1 (alpha) [Source:HGNC Symbol;Acc:12010]	15	63334831	63364114	TPM1	protein_coding	4.69012	7.88017	3.15833	1.30335	6.45821	0.0922969	4.62514	7.8852	3.75057	6.59478	2.30476	4.39975	4.5357	5.03969	8.01148	6.33344	5.39317	7.69109	9.72424	5.39485	4.02647	6.17472	3.81256	6.02988	5.51084	7.6348	4.35566	3.85122	4.63236	6.08746	4.49373	4.84144	4.81436	1.63085	6.97178	2.43232	2.05422	5.63619	4.74545	5.93996	4.28405	3.49726	2.69587
ENSG00000101166	slowmo homolog 2 (Drosophila) [Source:HGNC Symbol;Acc:15892]	20	57608200	57617964	SLMO2	protein_coding	9.4464	8.68868	8.21252	10.1628	9.08821	8.10996	8.71895	9.16857	7.36798	7.8874	9.68196	8.14893	4.94492	8.56684	9.10119	8.5224	8.64999	8.08248	8.9224	9.78749	8.87334	0	9.11063	8.70245	7.84786	8.16013	1.54151	7.23299	9.24808	6.74031	9.13896	1.29896	8.88044	9.57885	9.44951	9.10547	8.48784	9.13492	9.14375	8.57928	3.1116	9.3797	8.93414
ENSG00000124205	endothelin 3 [Source:HGNC Symbol;Acc:3178]	20	57875482	57901047	EDN3	protein_coding	0	0	9.32262	4.36024	0.736204	0.794161	6.2896	0	4.88985	0.999327	0	5.46599	3.82097	0	0	0	0	0	0	9.89087	0	0	3.9438	0	0	0	0	5.39049	0.557475	1.14887	0	5.41362	0	0	0	8.08437	8.62784	0	0	0	0	0	3.30386
ENSG00000175387	SMAD family member 2 [Source:HGNC Symbol;Acc:6768]	18	45357922	45457515	SMAD2	protein_coding	7.51177	7.20136	6.2804	0	0	5.75743	9.02975	1.98409	2.90097	8.14731	6.91424	5.16962	8.24453	2.84353	0.766636	4.35594	8.09804	2.85546	3.64628	0	5.4525	6.83461	8.58491	8.6157	6.62829	3.2617	0.766128	0	6.62727	3.87195	8.1732	2.40234	8.06395	0	8.30755	3.93883	0	0	0.667922	8.85938	0	4.89577	3.89787
ENSG00000074410	carbonic anhydrase XII [Source:HGNC Symbol;Acc:1371]	15	63613577	63674360	CA12	protein_coding	2.1751	0.962416	0	0	0	0	1.26378	0	0	1.29493	2.91901	0.493187	0	0	0	0	2.8289	0	0.901406	0	0	0	0	0	1.50912	0	0	0	1.35155	0	1.56964	1.15972	0	0	1.65052	0	0	0	0	0	0	0.600669	1.33506
ENSG00000260257		20	31444848	31446557	RP5-1085F17.3	lincRNA	8.83057	8.76882	8.40942	0.611701	7.81189	7.93694	7.79647	6.52278	8.35422	7.02003	8.11754	7.78593	9.37051	9.0918	6.80112	7.80353	9.29799	8.41233	1.915	8.31528	9.03555	7.59829	10.237	6.20097	9.6954	8.59702	9.04381	6.72368	8.78001	8.72535	7.42159	0	9.34817	7.56237	8.77414	7.78296	7.1858	5.28133	3.08565	9.61989	7.85693	6.74237	7.00996
ENSG00000132950	zinc finger, MYM-type 5 [Source:HGNC Symbol;Acc:13029]	13	20397622	20437776	ZMYM5	protein_coding	6.71955	4.59812	7.35264	0.641309	2.68246	3.38761	4.01354	5.47787	3.43297	5.70852	2.78593	4.11592	7.13686	4.25692	3.61864	3.38523	9.12547	5.3269	3.49928	4.58998	8.24051	3.73407	4.88986	0	7.77622	7.87736	4.67129	5.56182	3.84523	7.35083	4.30753	5.80781	7.4695	4.06584	3.27645	4.91904	3.59191	1.91946	4.19133	2.8771	6.4736	0	4.44758
ENSG00000168612	zinc finger, SWIM-type containing 1 [Source:HGNC Symbol;Acc:16155]	20	44509866	44513905	ZSWIM1	protein_coding	3.59383	2.18858	0.629674	0	3.76023	2.81586	4.24074	5.01802	1.71325	3.65239	5.23674	2.1702	3.64108	2.29559	4.73965	2.42671	3.05338	3.76555	2.41531	1.03062	2.05895	4.8099	3.5077	2.43934	2.46914	3.04847	3.35834	6.22824	2.11598	3.15396	3.68851	0	4.56652	0.679209	2.54653	1.90147	1.49148	2.73423	2.78405	4.10282	6.12275	2.01497	2.33896
ENSG00000187446	calcineurin-like EF-hand protein 1 [Source:HGNC Symbol;Acc:17433]	15	41523037	41574043	CHP1	protein_coding	8.34168	9.27854	9.85125	9.0989	9.62777	7.05696	8.79399	8.13025	5.69645	8.61027	10.8575	6.59028	8.44247	9.55985	7.65488	9.63712	10.1217	6.52542	10.5313	9.77688	10.2778	9.36328	10.5918	5.64473	9.42678	9.14396	9.59511	10.1874	9.30845	8.5592	7.96065	6.59893	5.64208	9.36581	9.36237	11.0205	6.51785	10.5873	8.53684	9.0437	7.51018	9.61534	9.22968
ENSG00000156253	RWD domain containing 2B [Source:HGNC Symbol;Acc:1302]	21	30376705	30391699	RWDD2B	protein_coding	9.25733	5.84073	8.49996	0	8.7291	6.17248	5.55587	1.27009	0	6.8402	1.32167	0.272442	2.73928	2.97702	7.64778	2.45068	3.37486	4.41452	2.91497	1.07912	3.7931	4.7821	6.5282	0.638429	6.18949	4.54405	4.34575	7.25449	9.24131	8.43805	6.88081	5.4658	3.66451	3.9657	6.1377	0	2.35247	1.37372	7.64184	3.35848	7.35206	1.51817	2.35749
ENSG00000101665	SMAD family member 7 [Source:HGNC Symbol;Acc:6773]	18	46446223	46477081	SMAD7	protein_coding	7.12278	0	0	0	0	0	0	0	0	0	0	0	2.01101	0	0.95549	0	0	0	0	3.85817	0	7.94403	0	0	0	0	0	0	0.557475	4.69804	0	0	4.08086	5.57621	1.13657	0	4.33364	8.76364	8.4711	1.71863	0	0	0
ENSG00000128739	small nuclear ribonucleoprotein polypeptide N [Source:HGNC Symbol;Acc:11164]	15	25068794	25223870	SNRPN	protein_coding	9.30328	9.19878	9.26144	7.99374	9.41852	6.13402	6.55274	8.53224	3.89357	8.7637	8.48117	8.4475	8.08647	9.04992	8.44635	9.22369	8.15089	7.45954	4.66342	8.78532	8.864	4.0268	5.82653	6.21587	7.79091	8.06392	6.91587	8.33613	7.89211	9.23472	8.13995	3.65996	6.25976	7.30916	8.62232	9.463	7.40895	8.95234	8.51595	7.50016	4.83371	8.21978	8.3352
ENSG00000260032	long intergenic non-protein coding RNA 657 [Source:HGNC Symbol;Acc:44311]	20	34633544	34638882	LINC00657	lincRNA	10.0552	9.35003	7.296	9.05016	10.3648	8.39732	10.0287	10.3203	8.55327	8.83674	8.39135	9.33668	2.82508	7.7958	8.65051	9.96332	7.87633	10.57	8.22671	10.577	8.09399	11.0639	9.59026	9.77562	7.81618	9.14458	6.23469	8.03056	10.0926	9.156	8.4203	7.32514	10.4556	6.91065	9.74348	10.6312	6.61963	8.85453	7.53579	5.6666	6.88905	7.48979	4.09964
ENSG00000141446	establishment of sister chromatid cohesion N-acetyltransferase 1 [Source:HGNC Symbol;Acc:24645]	18	19109242	19180845	ESCO1	protein_coding	4.67363	7.05772	0	1.36971	0	0.350809	5.67688	9.02906	2.14425	7.16904	5.71243	5.56246	7.22888	8.52584	0	1.92147	0	6.0973	0.577547	6.74353	0	4.33043	8.06948	4.78242	6.96741	1.93655	7.34671	6.28222	0	4.69804	2.44244	3.2568	5.07604	3.89855	7.16019	1.8663	0	1.63459	5.06104	1.44277	3.14937	0	6.07244
ENSG00000121741	zinc finger, MYM-type 2 [Source:HGNC Symbol;Acc:12989]	13	20532810	20665968	ZMYM2	protein_coding	9.08623	5.81223	7.39089	7.99434	5.97541	8.00257	4.14725	0.475076	8.7275	3.58373	3.735	6.45628	0	7.68677	3.61716	5.18196	3.94306	7.83026	6.55273	5.18525	6.92307	0	0	0	3.29605	0.646696	5.5891	6.38051	5.76291	5.46656	5.39333	8.94387	8.30654	9.39621	3.88593	5.14558	0	5.04422	4.26696	0	3.72568	6.3034	7.87959
ENSG00000103657	HECT and RLD domain containing E3 ubiquitin protein ligase family member 1 [Source:HGNC Symbol;Acc:4867]	15	63900817	64126141	HERC1	protein_coding	5.94973	8.9605	6.16988	7.74017	2.11401	0.371422	8.34092	0.747246	7.02309	3.76217	7.78226	6.36043	0	2.40959	0	0	7.02711	0	1.59939	1.51719	3.16037	6.95941	8.96456	0	6.34039	5.91803	7.16282	1.1804	6.04344	8.37176	6.16932	4.60693	8.91367	8.73927	5.82858	2.38048	5.19255	1.42438	8.78872	4.20224	4.6701	6.35073	4.36594
ENSG00000124253	phosphoenolpyruvate carboxykinase 1 (soluble) [Source:HGNC Symbol;Acc:8724]	20	56136136	56141513	PCK1	protein_coding	0	0	0	0	0	0	0	0	0	0	0	0	0	0	0	0	0	0	0	0	0	0	0	0	0	0	0	0	0	0	0	0	0	0	0	0	7.57658	0	0	0	0	0	0
ENSG00000156261	chaperonin containing TCP1, subunit 8 (theta) [Source:HGNC Symbol;Acc:1623]	21	30428126	30446118	CCT8	protein_coding	8.9162	5.65651	0.737545	8.87139	9.31023	8.84944	8.09846	6.7737	3.91744	6.8673	7.93314	2.74539	6.20428	8.2694	8.60791	9.27989	7.14507	7.94239	10.1405	10.4315	5.89471	9.85706	7.75082	0	8.35223	4.6622	6.13818	9.3523	10.5693	8.59861	7.56616	1.97123	9.14193	7.58356	5.32026	2.06183	6.66684	9.48607	9.33213	3.34553	6.94596	3.50187	9.49169
ENSG00000198034	ribosomal protein S4, X-linked [Source:HGNC Symbol;Acc:10424]	X	71475529	71497150	RPS4X	protein_coding	8.79201	6.39847	7.56368	6.49573	7.61036	8.42547	7.2045	8.3873	7.70895	6.82521	10.3276	4.78088	8.32067	8.80823	7.8738	9.55539	4.79705	7.45735	9.67081	6.60549	8.47577	8.79971	7.00294	8.4622	8.13011	8.04127	7.59999	7.55786	7.5674	7.50609	8.61021	8.80238	8.1245	10.025	9.14346	10.0288	9.07263	7.25725	8.55931	8.16539	9.72252	9.41723	6.95795
ENSG00000044574	heat shock 70kDa protein 5 (glucose-regulated protein, 78kDa) [Source:HGNC Symbol;Acc:5238]	9	127997132	128003609	HSPA5	protein_coding	7.56788	6.85018	9.63324	7.13895	7.81577	0.470288	7.66041	5.90308	5.3673	8.38249	7.25778	8.5044	2.33222	7.87344	9.73119	9.81979	6.51675	5.51037	9.54663	8.74978	8.76569	8.8249	2.20075	9.24335	3.4345	6.47231	7.58452	5.22905	8.16889	9.69674	8.44339	3.24351	8.09609	8.79477	11.2679	3.61603	1.20575	9.14677	9.24974	7.75162	7.39409	9.50393	0
ENSG00000214265	SNRPN upstream reading frame [Source:HGNC Symbol;Acc:11171]	15	25200181	25245423	SNURF	protein_coding	8.98815	5.80379	8.35876	8.46313	9.05658	6.89879	6.7922	7.94032	5.88528	8.45801	8.06453	7.42654	7.34158	9.58381	6.95903	9.47045	7.99793	7.09469	4.87982	9.8999	8.76827	6.24643	5.76906	5.84921	7.58563	8.58549	6.7747	7.73641	8.41855	7.50319	7.89081	3.69047	6.60448	7.36023	8.78857	9.52809	6.34289	5.49383	8.51277	6.52781	1.54144	8.73062	7.45676
ENSG00000092439	transient receptor potential cation channel, subfamily M, member 7 [Source:HGNC Symbol;Acc:17994]	15	50844670	50979012	TRPM7	protein_coding	9.00342	8.74294	3.19978	0	2.80572	0.692978	1.92391	7.8435	0.363427	3.93985	5.02484	8.08649	3.39593	4.00819	3.48907	1.2874	8.21141	2.78546	3.04042	1.21842	5.55675	1.62091	0	0.505546	4.33905	6.99905	3.4562	7.49233	5.24468	1.49882	5.85018	3.38738	3.25933	6.35285	8.70207	6.39792	3.35455	4.8254	9.85104	3.20025	5.3529	2.99488	1.90023
ENSG00000265681	ribosomal protein L17 [Source:HGNC Symbol;Acc:10307]	18	47014851	47018906	RPL17	protein_coding	7.79901	7.23164	6.80104	4.37757	8.11528	7.70344	7.33465	7.87785	5.25305	7.23606	8.59027	6.23537	4.75153	5.96212	7.41866	7.16758	8.8834	7.44141	7.69125	6.81942	7.77457	8.54753	3.28941	7.77222	7.85855	7.08071	6.47328	6.742	8.29692	7.34301	7.3133	7.99248	6.77118	9.12451	8.13683	7.29987	7.26694	8.74268	7.95183	7.62397	10.5582	8.0524	7.75159
ENSG00000107249	GLIS family zinc finger 3 [Source:HGNC Symbol;Acc:28510]	9	3824127	4348392	GLIS3	protein_coding	4.46063	5.19548	0	5.38061	6.94842	0	3.16375	0	0	0	6.47601	0	0	6.13041	0	7.48049	0	0	5.48053	0	4.99678	1.67126	0	0	0	6.81998	0.711054	3.63198	2.73558	6.69865	0	0	6.65941	2.31478	7.19601	0	0	0	7.2565	0	5.64148	0	0.552999
ENSG00000145321	group-specific component (vitamin D binding protein) [Source:HGNC Symbol;Acc:4187]	4	72607410	72669758	GC	protein_coding	0	9.64196	3.06017	9.7678	8.03702	8.20992	9.30277	8.3255	10.4627	9.33628	0	10.0351	9.63394	0	8.98833	0	8.75413	0	0	8.99797	8.81207	0	0.781936	9.33329	9.78457	0	9.86858	9.18556	0	3.90691	9.93606	1.29896	9.05408	0	1.99872	3.32139	7.58315	5.86433	0	10.5358	0	8.46433	9.84379
ENSG00000124209	RAB22A, member RAS oncogene family [Source:HGNC Symbol;Acc:9764]	20	56884752	56942563	RAB22A	protein_coding	8.77984	7.19616	6.39878	9.5774	1.7006	8.34442	6.11467	8.77199	7.85859	4.94893	9.61387	4.52328	4.48062	5.79483	3.68546	7.44135	5.70983	1.12913	8.47598	0	8.64165	2.56331	5.60133	6.46821	7.89636	8.29915	5.74408	4.57362	9.03335	7.75582	7.16194	6.39609	9.55205	3.8645	8.62985	5.46936	0.521576	3.13077	9.88646	0.710013	3.55041	8.28353	7.55972
ENSG00000166794	peptidylprolyl isomerase B (cyclophilin B) [Source:HGNC Symbol;Acc:9255]	15	64448011	64455404	PPIB	protein_coding	8.41781	9.09836	9.51003	9.17953	8.37737	8.73296	9.47662	7.48586	7.18012	10.1075	7.25775	8.62277	8.48483	8.26905	9.46164	8.68358	9.3228	8.6471	8.72699	7.65576	8.84522	10.1853	7.7964	8.67665	8.37341	8.6153	8.14929	7.0636	8.89178	8.23143	9.62043	6.96812	7.75103	8.46811	9.55191	7.33335	8.26701	8.62387	6.4008	9.63474	3.78288	9.16775	9.51401
ENSG00000104643	myotubularin related protein 9 [Source:HGNC Symbol;Acc:14596]	8	11141925	11185646	MTMR9	protein_coding	2.91661	3.20401	4.89993	0.789706	5.11446	3.33977	3.87715	1.66905	8.11838	5.9827	0	8.77901	7.70982	4.55139	1.7898	2.03994	2.6023	2.9349	4.60985	3.0113	3.25892	4.6708	7.2738	3.06829	7.9515	4.04016	3.51366	0	9.04945	6.34648	2.9434	4.38741	2.36491	6.11251	3.27467	3.71992	1.30826	0	3.25181	3.66117	4.57151	0	3.15746
ENSG00000120251	glutamate receptor, ionotropic, AMPA 2 [Source:HGNC Symbol;Acc:4572]	4	158125334	158287227	GRIA2	protein_coding	2.30478	3.50437	0	4.53472	0	2.61788	0	0.475076	6.67113	7.30244	1.06118	7.24209	0	4.78447	0	7.14451	0	5.60461	0	0	7.00086	0	4.93059	2.07236	2.2573	6.40439	7.05375	0	0	0.685898	0	4.42272	6.00272	4.74628	8.18515	7.17404	0	0	0	6.86676	0	3.74352	1.92706
ENSG00000130703	oxysterol binding protein-like 2 [Source:HGNC Symbol;Acc:15761]	20	60813580	60871268	OSBPL2	protein_coding	3.54	4.23035	5.46674	1.59825	3.44099	7.70547	4.50887	7.30917	1.06962	4.52791	8.44402	7.88405	3.95199	4.91797	1.48715	3.20085	4.25058	4.84004	5.61539	2.30553	3.81601	4.28061	8.74307	3.24676	4.38893	4.98253	4.97053	2.50304	5.65832	4.41938	4.28801	6.29895	4.87265	4.68628	4.00164	7.39457	2.87602	1.81803	4.49991	4.11479	6.24176	3.44349	3.6461
ENSG00000124222	syntaxin 16 [Source:HGNC Symbol;Acc:11431]	20	57226328	57254582	STX16	protein_coding	4.81791	5.82633	7.2275	7.76532	5.92144	3.5681	5.96916	2.37965	0.535016	4.94074	1.30907	6.59667	6.6287	5.45051	4.66773	9.2241	8.7574	6.47126	2.32028	1.92353	7.27222	2.93913	4.3958	0	6.64764	7.41896	4.75194	7.30076	7.5949	3.92205	3.76875	4.45141	7.15935	7.55887	5.21153	1.61535	7.66133	6.41627	2.28864	4.51067	5.20828	4.3411	6.12813
ENSG00000144659	solute carrier family 25, member 38 [Source:HGNC Symbol;Acc:26054]	3	39424839	39438842	SLC25A38	protein_coding	4.46063	0	0	0	1.22131	2.52893	0	0	0	0	0	0	0	0	0	8.37679	4.00311	0	0	0	0	0	0.781936	0	6.89287	0	0	0	0.958569	1.14887	3.03701	0	0	8.06791	0	7.44771	0	10.7246	0	0	2.02054	8.08536	0
ENSG00000168028	ribosomal protein SA [Source:HGNC Symbol;Acc:6502]	3	39448180	39454033	RPSA	protein_coding	7.33876	8.90758	8.53204	8.80316	8.73865	7.48198	7.75639	7.38178	8.74327	6.37909	8.49965	7.69664	9.26392	0	9.17287	9.13036	6.77415	9.41157	9.10041	9.35177	9.06772	4.91655	5.76449	7.02381	7.58956	5.90256	4.79462	7.53794	7.18186	4.22129	8.8485	9.25871	9.03524	8.99141	9.39467	9.63064	9.80268	7.37773	8.71492	6.73874	10.6062	7.28242	6.03469
ENSG00000249614		4	104882773	104958080	RP11-703G6.1	lincRNA	7.33724	7.55561	6.37217	6.39087	6.84745	7.93755	7.64247	6.46942	5.4326	7.50114	5.90603	7.28446	7.06538	8.79126	5.83433	6.52974	7.73134	7.85397	7.55511	7.23428	7.56864	7.27866	7.74517	6.32787	7.37893	7.98586	8.16045	7.02269	6.03444	7.23132	7.35343	9.12039	8.14116	7.10064	7.94323	7.89083	6.81191	7.47673	8.20346	7.82021	9.54114	9.18915	7.84805
ENSG00000100014	sperm antigen with calponin homology and coiled-coil domains 1-like [Source:HGNC Symbol;Acc:29022]	22	24666786	24813708	SPECC1L	protein_coding	5.00127	2.4852	5.49327	0.611701	3.36751	8.97471	6.24016	7.66267	2.61611	0	4.48352	6.42932	9.00047	8.46642	0.392954	7.2977	0	0.876649	4.51248	4.48651	0	5.52455	0.781936	0	2.9622	8.27596	1.827	0	0	6.55661	0	0	9.14851	0	6.48695	0	0	0	0	2.07697	0	5.6252	2.22394
ENSG00000154319	family with sequence similarity 167, member A [Source:HGNC Symbol;Acc:15549]	8	11278972	11332224	FAM167A	protein_coding	6.69299	5.05285	2.8086	2.5242	7.77728	7.38284	5.17116	2.60167	0.51357	7.73675	0	0	0	0.614652	7.26768	0	0	2.94277	0	7.69526	6.12062	0	0	0	7.2139	5.45891	0	0	0	2.39532	0	0	7.16725	0	6.69319	2.234	8.472	10.3566	0	0	0	0	7.39432
ENSG00000096968	Janus kinase 2 [Source:HGNC Symbol;Acc:6192]	9	4985033	5128183	JAK2	protein_coding	0	1.44608	0	5.70658	0	0	7.14082	0	0	6.73338	0	1.39517	0	0	0	0	7.64182	5.83337	5.04329	0	0	0	6.29828	2.50154	0	0	0	0	0	2.21792	2.58257	0	2.31632	0	0	1.3716	0	0	3.1134	0	0	0	0
ENSG00000103671	thyroid hormone receptor interactor 4 [Source:HGNC Symbol;Acc:12310]	15	64679947	64747502	TRIP4	protein_coding	4.21337	4.96688	6.38916	0	0	0.458775	0.913595	4.50655	0	0.464298	2.0088	2.56935	2.87361	5.99698	3.61716	1.06948	0	0	3.10567	0	2.90334	1.90174	4.10327	0	4.30863	2.61317	0	0	5.42038	2.57259	4.84689	0.973751	1.10346	7.27189	4.10323	4.96181	0	0	7.51931	1.50524	2.24183	0	1.19784
ENSG00000151552	quinoid dihydropteridine reductase [Source:HGNC Symbol;Acc:9752]	4	17461884	17513857	QDPR	protein_coding	0	6.4657	8.88307	7.58615	5.2076	5.89138	7.441	7.0448	7.23508	7.9788	0	6.67345	6.28125	5.59323	8.10792	0	9.31817	8.67897	0	7.43685	6.72641	0	5.95773	6.26797	8.40682	7.0833	8.30812	6.68276	5.02695	5.59928	8.02811	3.74571	4.42436	0	5.38376	9.86559	1.45528	8.59168	0	0	0	10.1931	0
ENSG00000129055	anaphase promoting complex subunit 13 [Source:HGNC Symbol;Acc:24540]	3	134196548	134205558	ANAPC13	protein_coding	4.10447	6.87901	7.14596	7.28282	6.54758	7.79173	7.15692	7.78761	7.57626	7.26545	8.60872	0	0	0	2.31955	8.00425	5.5869	8.67012	3.87808	8.01903	7.06747	7.59042	4.89615	6.27342	7.27974	7.65259	6.92354	7.68167	2.62961	8.19524	5.82542	1.67391	3.62914	8.11521	7.33101	5.53949	7.85147	6.23066	0	0	0	8.53633	8.41287
ENSG00000169155	zinc finger and BTB domain containing 43 [Source:HGNC Symbol;Acc:17908]	9	129567285	129600489	ZBTB43	protein_coding	3.57699	3.48894	2.52392	1.37559	2.87937	1.69059	2.69368	4.42193	3.0387	3.90082	8.81054	7.56354	4.7423	2.25282	6.28149	2.57798	7.2945	3.48118	4.22323	1.817	2.49895	7.31113	8.0976	2.34979	7.96193	2.97773	3.73685	0.468989	9.62009	4.56932	8.41567	2.98336	8.20455	5.39147	2.43903	6.25199	3.80514	7.18412	4.15364	4.27703	3.19825	5.77149	5.63432
ENSG00000163728	tetratricopeptide repeat domain 14 [Source:HGNC Symbol;Acc:24697]	3	180319918	180335616	TTC14	protein_coding	8.12633	1.17569	7.28375	1.63795	4.14116	7.14167	4.52742	0.39176	8.54144	2.1266	5.16878	4.9627	0	1.99852	0	3.41233	3.49013	7.90327	1.8616	7.60843	3.71178	0.0617052	1.87543	1.87329	1.17652	2.33292	2.60786	1.77883	5.68185	3.23641	0	4.06182	3.89649	3.83667	7.30604	0.61277	3.66407	0.506906	1.95355	8.31392	2.0151	0	1.65694
ENSG00000087448	kelch-like family member 42 [Source:HGNC Symbol;Acc:29252]	12	27932953	27955973	KLHL42	protein_coding	8.70386	8.57159	0.737545	5.4653	0.724626	6.0683	6.98642	0	8.37547	1.58407	7.79644	0	0	0	0	7.09595	2.09369	0	0	0	6.01958	0.438348	0	0	7.11368	1.7059	6.11211	3.0292	0	4.02003	6.8318	0	6.21175	1.61456	5.99832	4.12143	0	0	5.50181	0	4.02563	2.25082	6.62976
ENSG00000169100	solute carrier family 25 (mitochondrial carrier; adenine nucleotide translocator), member 6 [Source:HGNC Symbol;Acc:10992]	X	1505045	1511617	SLC25A6	protein_coding	8.25834	7.16564	8.79478	6.23757	8.3424	8.65822	7.09114	6.03008	3.37945	6.12796	6.99335	7.26138	8.08069	6.99948	8.34446	9.3754	7.95472	6.60217	10.3697	5.81774	7.79139	8.16054	1.65915	5.47324	7.35941	8.13713	8.10948	8.22004	9.44155	7.97256	8.92195	0	5.62456	8.38125	8.38459	9.30332	9.90233	10.1129	9.05231	6.4225	3.72568	8.74347	4.15516
ENSG00000099246	RAB18, member RAS oncogene family [Source:HGNC Symbol;Acc:14244]	10	27793197	27831143	RAB18	protein_coding	7.89417	2.98161	8.32187	6.19661	7.42157	3.58629	7.92027	5.36363	8.52135	3.16873	7.41069	8.48223	2.18134	5.85393	4.21198	5.97631	6.14859	0	8.50743	4.15064	7.44126	8.65669	2.75606	5.19198	7.60799	9.05242	6.58365	5.25352	7.03568	5.99314	8.20117	0	7.27181	9.19442	7.68498	9.22893	8.21507	10.1244	8.09906	1.44277	3.54853	0	5.51868
ENSG00000261087		8	102179033	102181857	KB-1460A1.5	lincRNA	6.08737	0	0	0	0	0	0	0	0	1.32112	0	0	4.47343	0	0	0	0	0	1.01083	0	6.93128	1.68113	0	0.457365	0	0	0	0	0.958569	0	0.636405	1.57129	0.64953	0	0	0	0	0	0	8.68948	0	0.600669	1.26387
ENSG00000213639	protein phosphatase 1, catalytic subunit, beta isozyme [Source:HGNC Symbol;Acc:9282]	2	28974506	29025806	PPP1CB	protein_coding	12.0062	10.486	10.3869	11.1381	11.179	10.9015	10.8777	10.2788	10.2852	10.144	10.4744	10.6382	11.0871	10.7636	10.524	12.4192	11.8297	11.4837	10.0384	10.7497	11.608	11.5034	11.2801	9.92748	10.2441	11.2973	11.7137	10.8173	12.161	10.2134	11.2822	5.48592	10.7919	10.6928	12.0451	11.4021	11.3662	10.0656	10.9585	10.9047	9.36602	11.2367	10.4661
ENSG00000079459	farnesyl-diphosphate farnesyltransferase 1 [Source:HGNC Symbol;Acc:3629]	8	11653082	11696818	FDFT1	protein_coding	6.97996	0	0.737545	2.6509	5.01311	1.50344	7.71145	6.03008	0	7.34934	9.13923	6.65607	0	3.72436	9.17259	0	6.72756	8.77297	7.85371	7.51971	9.02255	8.59485	0	6.74648	6.7733	5.58325	4.46081	9.02532	8.36737	6.4701	7.37219	7.14445	7.34932	9.65641	7.89675	3.66018	4.09713	0	8.42489	8.28557	5.64148	5.47181	2.91454
ENSG00000154265	ATP-binding cassette, sub-family A (ABC1), member 5 [Source:HGNC Symbol;Acc:35]	17	67240452	67323385	ABCA5	protein_coding	9.11386	8.75932	3.97098	7.63295	5.48999	0	7.7705	5.59063	5.72074	8.62956	6.12557	8.13685	4.92106	9.79714	7.15494	8.55743	7.85641	9.13196	5.95197	7.67568	6.74461	0	5.18	4.20835	7.94025	9.97042	5.40616	8.10531	8.3699	7.19851	6.9292	5.5306	8.54707	7.87508	8.59821	7.36212	7.12858	5.00692	6.54486	7.27692	5.40171	0	8.2729
ENSG00000082153	basic leucine zipper and W2 domains 1 [Source:HGNC Symbol;Acc:18380]	2	201675317	201688569	BZW1	protein_coding	3.57858	7.29274	7.04947	8.94845	5.47538	7.71971	5.576	5.33687	2.61611	7.98504	9.24808	7.57691	8.18476	9.20479	9.15863	0	8.29897	8.52048	9.9702	9.12142	8.25408	9.36569	8.60546	9.37029	7.8542	9.03542	8.53317	5.34626	9.1897	8.83034	3.38972	0	4.76965	8.11097	7.09212	6.5229	0	0.506906	5.43937	7.93947	1.33838	3.95044	9.05372
ENSG00000196954	caspase 4, apoptosis-related cysteine peptidase [Source:HGNC Symbol;Acc:1505]	11	104813593	104840163	CASP4	protein_coding	0	0	0	0	0	0	1.37424	0	0	1.80639	1.66597	0	0	1.04431	0	0	0	0	6.62869	0	0	0	0	0.906346	0	0	0	0	5.22188	0	0	0	1.0958	0	0	0	0	0	3.67533	4.57969	0	0	0
ENSG00000108298	ribosomal protein L19 [Source:HGNC Symbol;Acc:10312]	17	37356536	37360980	RPL19	protein_coding	9.77727	8.81743	8.82269	7.19716	9.21969	8.04328	8.89666	9.64176	6.85821	9.26544	8.69951	8.93441	7.67636	9.93661	8.95231	9.03353	8.75194	8.24238	10.55	9.44512	8.80775	9.06692	9.53531	8.00493	8.23044	8.63216	9.44804	9.44521	9.29975	9.47406	8.77082	8.03178	8.99902	10.5141	9.89946	9.40705	9.02518	10.078	9.80415	9.12649	8.72423	9.55012	9.06195
ENSG00000135486	heterogeneous nuclear ribonucleoprotein A1 [Source:HGNC Symbol;Acc:5031]	12	54673977	54680872	HNRNPA1	protein_coding	8.68329	8.89312	9.48833	8.27907	6.56797	8.44734	6.67794	7.19135	6.16537	7.64504	10.1169	8.17763	6.62612	5.82542	8.42341	10.6424	0	9.08753	9.88133	9.13683	8.22769	8.98468	6.88425	5.44099	8.47591	10.1719	8.50091	6.08137	10.3349	6.14009	6.59144	9.56591	9.09623	6.74356	7.85501	9.90846	8.45389	9.00402	4.17496	7.97409	8.73519	7.43707	8.69289
ENSG00000081760	acetoacetyl-CoA synthetase [Source:HGNC Symbol;Acc:21298]	12	125549925	125627873	AACS	protein_coding	4.24036	6.11628	3.56041	4.12464	4.96502	4.20689	7.11354	8.38424	2.80272	5.35078	3.69198	7.69958	8.00666	5.6765	2.9658	6.29299	4.33711	6.23194	5.01956	4.91231	8.09562	4.80906	5.63951	6.24016	5.21782	6.07828	5.54372	3.9679	7.42877	5.84823	5.59495	6.63859	5.33494	2.66828	9.0567	3.43799	3.53396	5.01051	5.7965	5.19694	5.59934	4.62695	5.11857
ENSG00000132424	PNN-interacting serine/arginine-rich protein [Source:HGNC Symbol;Acc:21222]	6	99845927	99873207	PNISR	protein_coding	8.44575	8.23131	4.3937	8.48582	6.00562	2.43414	7.80162	9.1558	8.35798	7.93235	8.30104	7.11212	8.177	7.80793	5.69262	5.59063	6.03813	9.009	9.00311	6.88095	8.07293	8.26415	4.07276	6.59379	7.03829	8.63265	8.70817	5.75823	8.59736	7.92276	8.4456	8.69462	8.56881	7.84597	8.24907	8.55332	9.06678	7.07551	8.26011	5.87906	10.9153	9.08252	7.44934
ENSG00000155324	GRAM domain containing 3 [Source:HGNC Symbol;Acc:24911]	5	125695824	125832186	GRAMD3	protein_coding	5.25625	6.33824	0	10.629	8.82359	0	7.92027	5.73506	8.53638	7.59112	1.51691	0	0	3.07667	4.16265	0	0	4.33726	0	0	3.37939	0	1.2075	5.85372	3.55	2.73461	9.27205	0	6.63783	7.55753	1.41324	5.11236	4.12855	8.71373	1.13657	4.03092	7.81287	8.40362	8.24101	6.3635	5.17631	0	1.93237
ENSG00000108424	karyopherin (importin) beta 1 [Source:HGNC Symbol;Acc:6400]	17	45726842	45762871	KPNB1	protein_coding	6.94444	5.57186	2.32309	5.95926	0.736204	1.83562	5.14997	8.73558	6.36925	3.3911	9.98959	8.05454	5.07037	8.00282	8.12974	9.41721	8.71123	9.77599	4.14964	2.81815	5.29193	7.52347	2.20075	6.62394	7.31105	4.84365	1.18523	0.508055	8.05756	7.59961	7.24981	6.83741	4.2966	5.8114	7.9961	3.71934	0.521576	0	4.9555	0	7.57407	4.25359	7.46468
ENSG00000112308	chromosome 6 open reading frame 62 [Source:HGNC Symbol;Acc:20998]	6	24705089	24721064	C6orf62	protein_coding	10.1805	10.6579	12.1175	10.7158	10.5187	8.96998	9.68868	8.46699	9.62945	9.68992	10.3165	10.1375	8.94516	7.91541	9.09008	9.68607	10.9149	10.8294	10.6301	10.9211	9.19134	11.2819	11.9393	8.04528	9.73636	10.5563	5.89734	8.81671	9.82335	9.78424	9.79196	6.88561	8.80519	10.4014	10.8778	11.0962	7.67643	10.1485	10.7109	10.7791	8.62253	10.556	6.38862
ENSG00000131236	CAP, adenylate cyclase-associated protein 1 (yeast) [Source:HGNC Symbol;Acc:20040]	1	40505905	40538321	CAP1	protein_coding	8.57726	6.04358	5.31127	6.35391	9.26248	5.34482	4.89053	8.37209	6.10821	6.26546	9.31359	5.25123	2.33367	3.98853	8.14987	4.58821	4.79705	1.81078	9.32299	2.61387	4.99678	8.91848	9.01549	6.99414	8.13011	0.646696	6.34451	2.95496	8.21997	6.67306	7.51896	1.67391	5.7054	0	3.69886	5.53899	7.42395	10.2242	5.83123	3.34553	7.6419	8.24858	6.92505
ENSG00000249736		5	66928094	66942617	RP11-83M16.5	lincRNA	5.96983	4.90317	2.78504	0	4.3416	5.21924	6.96479	5.18662	3.70919	5.75704	4.22813	5.26582	6.68545	4.79307	3.71052	2.837	6.52681	6.61933	5.78539	5.39565	5.3935	5.92513	6.66694	4.81937	6.05948	6.47571	6.59263	2.45275	6.41121	6.28068	5.95666	7.13421	6.85422	4.9866	4.45977	3.75823	4.15999	4.25604	6.32368	6.33082	5.74586	0	6.09371
ENSG00000145423	secreted frizzled-related protein 2 [Source:HGNC Symbol;Acc:10777]	4	154701744	154710272	SFRP2	protein_coding	0	0	0	0	0	0	0	0	0	0	0	0	0	0	0	0	0	0	11.0209	0	0	6.64982	0	0	0	0	0	0	0	0	0	0	0	0	0	0	0	0	0	0	0	0	0
ENSG00000104112	secretogranin III [Source:HGNC Symbol;Acc:13707]	15	51973550	52013223	SCG3	protein_coding	7.46784	9.24816	8.11865	9.09125	9.5379	8.73876	9.2973	7.71181	7.98454	7.99866	8.14549	8.78514	9.22287	9.48056	8.88512	9.31548	7.20382	7.36524	0	9.58287	7.83198	0	7.9695	8.52436	9.51442	9.78769	8.9184	10.2475	8.8905	10.2106	8.73372	5.59892	7.50647	8.67407	9.6218	10.0754	7.92312	7.9768	9.7433	8.34014	9.59919	8.70648	9.6891
ENSG00000131504	diaphanous-related formin 1 [Source:HGNC Symbol;Acc:2876]	5	140894583	140998622	DIAPH1	protein_coding	5.90963	0	0	6.73623	8.27578	7.51319	4.72667	0	5.84399	2.8062	0	7.39663	7.82837	4.78447	0	8.39079	0.725676	7.55037	5.63585	7.34067	5.46046	1.39983	7.79822	7.12641	8.05347	6.97071	0	1.42681	7.80198	7.42153	0	0	4.42436	0	6.80566	5.10178	3.51759	0	7.1288	2.62183	6.92796	9.28852	6.76076
ENSG00000071054	mitogen-activated protein kinase kinase kinase kinase 4 [Source:HGNC Symbol;Acc:6866]	2	102313312	102511149	MAP4K4	protein_coding	8.15376	4.36444	6.00443	8.97856	4.1946	5.04142	2.56953	2.45239	0	0	5.63041	0	4.13815	0.734643	8.27908	4.52189	7.89954	1.75469	9.25036	0	6.66588	5.08622	10.5113	5.58283	7.43905	8.06778	2.35114	2.26406	8.84894	8.40183	3.61795	2.71951	1.43615	0	5.74786	5.10289	0	9.19936	9.35046	6.61183	0	0	6.35798
ENSG00000117450	peroxiredoxin 1 [Source:HGNC Symbol;Acc:9352]	1	45976708	45988719	PRDX1	protein_coding	8.29501	0	7.48525	4.90897	3.54258	6.89261	4.89053	6.43959	3.91744	4.88134	9.83626	7.35414	2.51671	8.2137	7.28227	9.22546	7.24792	3.3501	8.73357	7.75866	4.99678	7.34108	1.28621	7.52599	2.62905	5.23889	6.58365	7.70229	5.31029	8.26293	5.80453	1.67391	7.20109	9.11326	8.26602	1.64005	1.66794	0.506906	4.47186	0	4.15506	0	0
ENSG00000198888	mitochondrially encoded NADH dehydrogenase 1 [Source:HGNC Symbol;Acc:7455]	MT	3307	4262	MT-ND1	protein_coding	11.4099	10.8232	11.6823	9.85222	10.1197	10.2101	10.2578	10.5741	11.7396	10.4392	11.9173	10.4947	9.48239	12.6503	12.2245	12.2423	11.1891	11.8866	10.0606	12.0908	10.5038	11.6033	12.6748	10.5543	10.9004	11.7214	11.9508	4.31889	11.6217	12.3911	11.1671	12.9006	12.7726	12.4229	13.5	10.0085	12.6267	10.2189	11.6231	10.7595	12.9077	9.62537	11.5897
ENSG00000143971	Ewing tumor-associated antigen 1 [Source:HGNC Symbol;Acc:24648]	2	67624451	67637677	ETAA1	protein_coding	0	0	1.58593	0	0	0	3.02953	0	0	0.999327	9.0806	0	5.38935	0	1.35918	0	0.725676	0	2.18674	0	0	0	3.15604	0	0	0	0	3.68029	0	1.49882	0	0	0	0	6.54366	0	0	0	0	0	0	0	0
ENSG00000198763	mitochondrially encoded NADH dehydrogenase 2 [Source:HGNC Symbol;Acc:7456]	MT	4470	5511	MT-ND2	protein_coding	13.0754	12.069	12.524	11.5691	11.3148	11.1869	11.6812	11.4275	12.439	11.2287	14.3268	11.3832	11.0386	13.4749	13.2762	13.9362	12.3629	12.7878	10.8586	12.109	10.5643	12.4237	12.8392	11.9148	11.5762	12.129	13.2305	10.1286	12.156	13.2951	12.1506	14.1647	12.4057	12.9576	13.5402	11.225	13.2698	11.8193	13.1028	11.6393	14.071	11.0272	11.7544
ENSG00000198804	mitochondrially encoded cytochrome c oxidase I [Source:HGNC Symbol;Acc:7419]	MT	5904	7445	MT-CO1	protein_coding	15.739	13.5873	13.778	11.0445	10.5638	12.2902	14.024	12.9961	14.8246	12.828	14.4529	12.8697	12.7062	15.757	14.3927	15.9427	13.9371	14.725	12.0037	12.4345	12.7561	14.2375	15.8262	13.3182	13.5461	14.4349	15.166	10.9519	15.1758	15.6029	13.3981	16.6063	13.9265	15.374	13.7874	11.9742	14.871	12.2349	15.4277	13.9346	13.6781	11.8455	14.001
ENSG00000198712	mitochondrially encoded cytochrome c oxidase II [Source:HGNC Symbol;Acc:7421]	MT	7586	8269	MT-CO2	protein_coding	13.6869	12.5011	13.464	12.1541	12.6598	11.8308	12.1595	12.0507	13.8168	12.1841	13.4992	12.1045	11.8879	14.1137	14.022	13.599	12.411	12.6571	12.0127	13.4869	12.2764	13.2183	13.9824	12.6955	12.4536	13.0075	13.3889	10.7751	13.217	14.0374	12.6684	14.9243	12.5771	14.0653	13.5446	12.0424	14.3438	13.5812	13.3635	12.5425	15.0903	12.7532	12.8811
ENSG00000228253	mitochondrially encoded ATP synthase 8 [Source:HGNC Symbol;Acc:7415]	MT	8366	8572	MT-ATP8	protein_coding	6.4971	5.96609	5.51448	6.15445	5.86438	4.47819	5.35077	4.4376	6.88977	4.90559	6.93476	5.08795	4.74203	7.78037	7.22605	6.81132	5.50621	6.51253	5.19091	6.33298	4.09902	6.40214	7.27575	5.57377	5.89735	6.41399	6.71192	2.60064	5.73762	6.74031	6.12416	8.963	6.31242	6.892	6.46755	4.80678	6.93676	6.41278	6.51842	5.16758	8.81026	5.45493	6.32935
ENSG00000054654	spectrin repeat containing, nuclear envelope 2 [Source:HGNC Symbol;Acc:17084]	14	64319683	64693165	SYNE2	protein_coding	7.74196	8.162	4.28183	1.96897	5.69357	3.91907	5.21419	5.14445	3.66999	7.52512	9.67091	4.71658	4.75827	9.11472	3.74697	9.11811	5.59297	8.35546	5.75927	7.46795	6.5943	6.10132	5.6368	3.01102	5.4944	10.5848	5.54805	3.00133	8.79976	8.63518	6.87531	9.54735	9.69513	10.1841	7.59349	3.5801	1.41579	6.44855	8.8097	4.31655	7.92702	1.23451	4.74138
ENSG00000198899	mitochondrially encoded ATP synthase 6 [Source:HGNC Symbol;Acc:7414]	MT	8527	9207	MT-ATP6	protein_coding	11.8401	11.3377	11.2925	11.0728	10.8126	10.1171	10.5374	10.5508	12.1233	10.5334	12.3854	10.5156	10.1379	13.1703	12.8928	12.1325	10.4128	12.0396	10.6682	12.0613	9.5737	11.5672	12.6833	11.2556	10.9149	12.0809	12.1392	7.73481	11.4027	12.3023	11.4332	14.0256	11.723	12.7683	11.6575	9.92147	12.3643	11.4887	11.8327	10.9098	13.6621	10.6044	12.0011
ENSG00000198938	mitochondrially encoded cytochrome c oxidase III [Source:HGNC Symbol;Acc:7422]	MT	9207	9990	MT-CO3	protein_coding	12.8485	11.7749	12.5332	10.6661	9.80285	10.5447	11.3969	11.2967	12.5795	11.1445	13.4775	11.3902	11.3618	14.1179	13.2178	13.89	11.1584	13.1427	10.9595	13.1137	10.7669	12.6363	13.2206	11.7796	11.4961	12.5113	13.1144	9.333	12.2403	12.9201	11.6131	14.4692	12.4595	13.489	12.9701	10.7057	13.2196	12.2443	12.5371	12.0824	14.253	11.6116	12.5254
ENSG00000212907	mitochondrially encoded NADH dehydrogenase 4L [Source:HGNC Symbol;Acc:7460]	MT	10470	10766	MT-ND4L	protein_coding	10.3581	8.81559	9.7888	8.89238	8.81508	7.48391	8.49531	8.46896	9.93182	8.47844	10.1356	8.67293	7.44503	10.2967	10.3334	10.5936	9.03146	9.36417	7.65083	10.0278	8.76602	9.60922	10.7425	8.6215	9.07456	8.92728	10.1072	5.63067	9.67257	10.6999	8.72996	11.2669	9.0118	10.8036	9.93434	7.05851	11.0261	7.53448	9.80253	8.40008	11.3501	10.2127	9.2629
ENSG00000198886	mitochondrially encoded NADH dehydrogenase 4 [Source:HGNC Symbol;Acc:7459]	MT	10760	12137	MT-ND4	protein_coding	14.3662	12.7654	13.8162	12.564	12.5774	11.644	12.4947	12.1756	14.1551	12.1066	14.3621	12.3865	11.0919	14.7617	14.1708	14.6362	12.8746	13.8575	11.7768	13.7436	12.1726	13.7353	14.3381	12.3617	12.7614	13.3466	14.0376	10.5022	14.2048	14.31	12.8583	15.1737	12.5342	14.513	14.0215	11.1884	14.989	12.1494	13.8721	12.6542	15.7395	13.141	12.8416
ENSG00000198786	mitochondrially encoded NADH dehydrogenase 5 [Source:HGNC Symbol;Acc:7461]	MT	12337	14148	MT-ND5	protein_coding	12.6741	11.3078	11.7554	10.6609	10.3677	10.0117	11.1363	11.2032	12.0497	10.9813	13.0908	10.9049	10.7666	12.6978	11.9353	13.0422	11.2122	11.8022	8.17632	11.6836	10.4171	11.4098	12.9188	10.6826	11.2186	10.9351	12.4176	8.02107	12.0246	12.4231	10.5992	13.5679	11.1346	12.2394	12.3347	10.7193	12.7933	11.3256	11.4452	11.1168	13.0624	11.3346	11.496
ENSG00000198695	mitochondrially encoded NADH dehydrogenase 6 [Source:HGNC Symbol;Acc:7462]	MT	14149	14673	MT-ND6	protein_coding	10.5221	9.08971	9.34055	6.95464	8.14276	8.04529	8.75396	9.45174	9.63328	8.5005	11.3189	8.9114	8.30001	10.9941	10.0063	10.9192	9.43586	9.67644	6.08735	8.69825	7.08186	8.95546	10.0741	8.1833	8.80259	9.26097	10.6083	6.91749	10.2625	9.99086	8.43639	11.446	8.26714	10.259	10.0995	7.82633	10.8986	9.0109	9.8233	8.33247	9.96246	8.71539	9.29115
ENSG00000198727	mitochondrially encoded cytochrome b [Source:HGNC Symbol;Acc:7427]	MT	14747	15887	MT-CYB	protein_coding	13.0744	12.2734	13.3979	11.034	12.1117	10.668	11.9197	11.9485	13.2183	11.7215	13.691	11.9351	11.1143	14.4231	13.9668	14.1301	12.1661	13.3256	11.8089	13.3909	11.5625	13.218	13.3757	12.0853	11.9208	12.9474	13.5153	9.87559	13.6063	13.9641	11.5931	14.556	12.5061	13.9969	13.0371	11.294	13.773	12.9198	13.1359	12.6508	15.3813	12.6282	12.7496
ENSG00000002586	CD99 molecule [Source:HGNC Symbol;Acc:7082]	X	2609220	2659350	CD99	protein_coding	9.30974	9.36342	10.0858	11.1153	10.1601	10.0705	9.35807	8.79198	9.20402	9.32845	8.75741	9.28762	9.29424	9.73375	8.95413	9.83174	9.18355	7.20279	6.12979	9.64795	9.83616	6.20259	9.39898	9.90265	8.89715	9.96959	9.66855	10.4481	8.5956	9.20065	9.25347	9.14708	8.42346	9.35849	9.46549	10.4205	9.80805	9.26796	9.76494	9.26725	8.96832	10.0634	9.43926
ENSG00000096384	heat shock protein 90kDa alpha (cytosolic), class B member 1 [Source:HGNC Symbol;Acc:5258]	6	44214824	44221620	HSP90AB1	protein_coding	11.8904	9.81399	10.8474	10.8707	10.7189	10.3876	10.1712	11.0056	9.92232	11.0154	12.1385	10.8606	10.6169	11.4125	11.0354	11.8187	10.4609	12.9319	10.1732	11.4627	10.6303	9.8098	10.4602	11.5717	10.0164	11.6746	9.85376	10.7112	12.1881	12.2508	10.3585	7.57089	9.76566	12.0401	11.9687	11.338	9.67526	9.74722	11.7967	10.696	11.1837	11.3844	10.3402
ENSG00000117448	aldo-keto reductase family 1, member A1 (aldehyde reductase) [Source:HGNC Symbol;Acc:380]	1	46016215	46035721	AKR1A1	protein_coding	1.80567	6.6648	9.07737	8.27319	5.15869	4.43552	7.21637	1.63322	7.27107	7.06777	0.99455	0.411552	1.93491	3.16476	8.15724	7.77522	4.84115	2.89004	7.402	1.8246	1.79672	5.20378	7.154	7.67744	5.79464	8.83012	0.377834	9.07525	6.21329	7.91187	8.43251	10.4729	3.7687	8.82296	5.78863	6.18347	8.23977	7.11548	9.17904	0.653344	9.84853	5.6196	6.01138
ENSG00000163618	Ca++-dependent secretion activator [Source:HGNC Symbol;Acc:1426]	3	62384022	62861054	CADPS	protein_coding	9.66951	9.53782	8.24144	3.59565	8.20261	8.69629	7.78672	6.81426	0	7.96306	6.07081	6.72121	4.79496	7.67778	8.47844	9.64908	5.95422	9.0113	0.2421	8.68199	5.68654	0.722481	4.00649	8.05163	8.30831	6.43988	7.19692	3.24947	7.08363	8.81997	8.31525	9.30011	5.53168	7.50266	8.03937	9.33863	6.59065	6.98927	6.77247	7.59498	8.17265	4.55017	7.12272
ENSG00000167037	small G protein signaling modulator 1 [Source:HGNC Symbol;Acc:29410]	22	25202236	25323545	SGSM1	protein_coding	6.05058	4.1063	3.89277	3.42953	3.13472	1.99687	4.39556	5.23269	4.20885	3.35845	3.92484	5.1517	6.18408	6.11578	6.74862	3.25955	4.77414	5.9523	4.30477	2.43414	4.45267	4.75726	4.73751	6.96952	5.00754	3.72674	4.58623	5.41139	4.01437	4.22364	4.70965	8.12292	4.56374	3.75141	9.40247	4.5061	4.06333	1.12074	7.48572	5.33334	7.11443	8.31735	2.89564
ENSG00000137040	RAN binding protein 6 [Source:HGNC Symbol;Acc:9851]	9	6011043	6015618	RANBP6	protein_coding	8.34444	7.59256	0	0	0	3.29408	4.2714	0	0	7.08613	4.57406	0	0	0	0	9.49689	0	0	8.0215	0	8.5054	0	0	6.53153	8.52259	0	0	0	4.3462	1.14887	7.7068	0	7.56396	0	8.46753	0.61277	8.4434	0	0	0	0	0	0.552999
ENSG00000109445	zinc finger protein 330 [Source:HGNC Symbol;Acc:15462]	4	142142041	142155851	ZNF330	protein_coding	4.8808	3.08297	0	4.36024	4.71699	2.78084	3.02953	5.53104	0	2.45833	4.71999	3.76914	0	0	6.40778	1.81621	0	8.77297	1.01083	0	8.31145	1.39983	2.59361	0	0	0	0	0	6.56783	7.0759	0	0	3.06911	2.69288	4.05151	0.61277	0	0	0	0.653344	0	1.35008	0
ENSG00000128731	HECT and RLD domain containing E3 ubiquitin protein ligase 2 [Source:HGNC Symbol;Acc:4868]	15	28356186	28567298	HERC2	protein_coding	3.09503	5.08863	3.50127	0	2.29323	4.54957	4.69243	7.32645	6.65347	2.89994	2.09082	1.21694	2.01642	7.81052	1.57163	8.18909	0	4.69577	3.98368	1.42764	8.86975	1.83704	3.21424	1.05944	5.98422	7.69278	5.32618	6.20201	3.05833	6.50465	4.12749	6.17247	2.79899	2.50612	7.05528	2.48645	0.910544	2.26479	2.60993	5.97007	8.32979	8.80268	2.63642
ENSG00000173575	chromodomain helicase DNA binding protein 2 [Source:HGNC Symbol;Acc:1917]	15	93426526	93571237	CHD2	protein_coding	5.12988	7.3895	5.25187	6.80597	5.33204	8.86058	6.1145	5.68617	5.85149	6.94317	8.18766	5.49405	6.96004	8.7317	6.45648	4.82663	8.43164	8.25724	8.69997	5.18396	8.39326	6.89736	8.23936	6.15073	8.18684	9.17768	6.6757	6.89008	8.23143	6.52882	6.55158	4.18567	8.21651	7.33021	8.29174	10.7735	4.35375	2.94292	7.09017	5.27478	8.47761	7.34613	6.34444
ENSG00000184432	coatomer protein complex, subunit beta 2 (beta prime) [Source:HGNC Symbol;Acc:2232]	3	139074442	139108574	COPB2	protein_coding	8.62267	7.37778	6.9595	9.46859	6.72249	5.11202	5.87699	5.63998	1.31497	9.31046	9.92697	7.62687	9.3582	3.14929	9.57867	3.01405	6.48035	5.23124	8.98957	3.69764	6.4283	8.71909	8.21518	9.17837	7.50939	8.71835	7.68814	7.73738	9.15601	7.57181	7.25023	10.1647	9.46697	5.0739	8.46396	9.14739	2.86485	7.83586	4.90706	3.91344	8.20664	7.42311	5.16044
ENSG00000131238	palmitoyl-protein thioesterase 1 [Source:HGNC Symbol;Acc:9325]	1	40538379	40563375	PPT1	protein_coding	8.7863	7.71997	9.26901	8.24843	0	8.31175	9.35982	5.43025	9.30695	8.60043	8.93125	7.69786	7.64029	9.70098	9.29557	8.04615	8.20852	3.75932	4.57526	3.07884	6.97025	8.5535	8.903	8.40291	5.92754	8.62026	8.03085	8.67964	5.88308	9.58032	9.05723	7.06509	7.58974	9.12935	5.81082	4.57018	7.91273	10.4276	8.07721	8.37042	2.48183	9.88891	8.99485
ENSG00000087460	GNAS complex locus [Source:HGNC Symbol;Acc:4392]	20	57414773	57486247	GNAS	protein_coding	11.6738	11.6934	11.7084	11.6803	11.8316	11.2626	10.509	10.8235	10.9349	10.9134	11.8548	10.3195	11.6486	12.3555	11.6893	12.2247	11.0558	9.24398	7.96401	12.4824	10.9477	7.12663	9.91553	10.8477	10.9181	12.5632	11.045	11.651	10.4532	11.4436	11.2329	10.8356	10.964	11.7008	12.1909	11.4492	11.7762	10.5786	11.3756	9.0095	11.7535	13.2956	12.1241
ENSG00000108821	collagen, type I, alpha 1 [Source:HGNC Symbol;Acc:2197]	17	48260650	48278993	COL1A1	protein_coding	3.12213	2.28363	0.14636	0	2.39717	0	2.53428	1.84537	0	2.8756	3.86513	0	1.25643	2.23176	1.59574	2.45447	1.38297	0	12.876	0	2.23205	12.1196	2.60559	1.48596	2.29669	1.67812	1.1359	0	0.24362	0	2.53782	1.89963	2.20863	1.14565	3.56866	3.20451	0.903844	2.03955	2.93051	0	3.88493	0.982606	0.986213
ENSG00000112339	HBS1-like (S. cerevisiae) [Source:HGNC Symbol;Acc:4834]	6	135281516	135424194	HBS1L	protein_coding	7.16402	4.87914	7.46904	6.75073	5.88728	7.19865	6.06612	6.13932	0.795298	5.01015	2.20855	7.16806	3.097	0	6.06177	2.63765	5.85474	9.01627	7.11951	0.803173	7.00389	9.17586	5.17886	7.46178	5.9424	8.67393	0	9.07814	7.19064	2.10406	8.04184	7.06044	2.19077	6.01356	1.76433	0	3.98256	0	3.27217	2.58924	1.97639	3.78357	1.59136
ENSG00000159388	BTG family, member 2 [Source:HGNC Symbol;Acc:1131]	1	203274619	203278730	BTG2	protein_coding	6.27037	9.67175	9.22142	9.23977	9.34313	9.33348	6.68521	9.50149	8.87274	7.11241	8.43541	7.75885	6.9154	0.614652	8.20448	10.1379	4.65455	7.72016	0	7.76485	8.84197	8.30708	0	9.39954	7.87909	8.79576	9.79393	8.69294	0	10.6786	6.90271	8.10631	6.54106	3.45131	8.79596	11.215	5.21523	12.5609	6.55501	8.63855	7.90373	0	7.04217
ENSG00000132780	nuclear autoantigenic sperm protein (histone-binding) [Source:HGNC Symbol;Acc:7644]	1	46049518	46084566	NASP	protein_coding	3.58544	4.24179	6.20606	2.29192	4.28458	3.41617	5.7716	3.6922	7.23811	4.00907	2.76301	5.00304	3.80802	6.75988	2.86897	2.81354	4.48383	9.35244	7.50572	8.34308	4.16161	5.77131	4.9702	1.57615	5.03164	9.98573	4.52368	6.18344	3.87151	5.01208	5.20341	6.80904	9.02307	2.85821	3.82928	3.8442	9.7857	6.16455	8.49329	4.45034	8.94644	2.42046	6.49474
ENSG00000122176	fibromodulin [Source:HGNC Symbol;Acc:3774]	1	203309756	203320617	FMOD	protein_coding	0	0	0	0	0	0	0	0	0	0	0	0	0	0	0	0	0	0	9.61307	0	0	10.3972	0	0	0	0	0	0	0	0	0	0	0	0	0	0	0	0	0	0	0	0	0
ENSG00000096696	desmoplakin [Source:HGNC Symbol;Acc:3052]	6	7541808	7586950	DSP	protein_coding	8.48683	9.87797	8.5675	5.76378	7.93474	8.79206	9.80972	9.77309	9.73451	6.71291	8.4989	9.16802	10.6173	10.4617	8.29786	10.411	7.59868	9.66538	0.592192	10.5937	10.4931	3.07345	9.14953	8.88961	8.66153	9.38086	8.15211	8.32442	9.81158	10.3368	8.74868	6.60576	7.26649	9.08251	10.3265	6.84932	7.62194	7.21286	9.51507	9.16587	7.0824	8.64269	5.51868
ENSG00000263731		17	79836301	79838982	RP11-498C9.15	lincRNA	0.883707	2.95512	3.4876	2.15494	0	7.06128	1.40058	0.479118	1.44301	1.58887	1.2921	8.06987	2.70393	2.15984	0.808501	1.89936	2.27997	3.77351	1.37499	0	1.50021	1.60286	3.32816	0.199914	1.31451	1.62355	0	1.39243	1.52473	0.468305	0.877525	1.03673	1.25551	0	1.60577	2.57624	0	2.40326	0	0.759667	1.72609	0	4.50689
ENSG00000010818	human immunodeficiency virus type I enhancer binding protein 2 [Source:HGNC Symbol;Acc:4921]	6	143072604	143266338	HIVEP2	protein_coding	2.91995	0	6.76741	2.38529	2.11401	0	1.37424	8.09595	0	5.28409	8.25385	1.78463	0	0	0	0	3.34362	0	5.92811	4.25986	0	0	0	6.91969	6.02848	7.84231	0	4.74147	0	1.14887	1.41324	3.17518	3.33607	8.92919	3.32039	0	2.73591	0	4.12812	0	0	4.08823	5.31368
ENSG00000215066	chromosome 9 open reading frame 38 [Source:HGNC Symbol;Acc:23398]	9	6467618	6470375	C9orf38	protein_coding	9.36032	2.28193	8.42575	0	1.07852	7.92532	2.21116	1.8089	1.40391	2.9134	1.93965	2.23533	1.77163	3.03146	1.03037	0	8.61804	3.40351	7.62613	1.51954	6.73972	1.56607	4.42701	0.665189	1.18854	3.46158	2.92466	2.22941	2.47785	0.860496	2.47013	4.58866	2.26433	2.97951	0	1.20939	0	0.851286	1.82519	3.71566	1.77202	0	2.57101
ENSG00000267834		9	131766781	131767277	RP11-167N5.5	lincRNA	5.96701	7.19571	5.29664	4.14114	5.10361	5.43522	6.83146	6.76876	5.1346	6.60881	4.25903	6.36621	5.55908	7.78111	4.14361	5.41077	6.48173	7.79734	6.50039	4.44363	7.12141	6.53911	7.35764	4.61717	6.48279	7.70933	6.77244	4.85651	6.46604	6.98587	6.46585	8.25945	6.63468	5.02145	6.51663	6.47349	4.85015	5.39928	7.19788	6.50069	7.68283	5.40129	6.13111
ENSG00000184743	atlastin GTPase 3 [Source:HGNC Symbol;Acc:24526]	11	63391559	63439393	ATL3	protein_coding	7.86447	1.54887	9.283	7.6758	3.10042	4.49261	5.92087	7.6686	2.07713	7.20831	7.48517	5.48777	3.86415	5.18433	0.777217	6.26048	7.82677	5.04466	7.7681	1.73664	1.10867	6.02834	8.95022	3.96569	7.45799	6.00025	7.41173	0.455729	8.11227	3.97327	6.90625	3.16464	1.64468	4.66694	9.05981	10.6325	4.4163	0	7.51169	8.42024	3.7373	1.47326	7.90747
ENSG00000013441	CDC-like kinase 1 [Source:HGNC Symbol;Acc:2068]	2	201717732	201729422	CLK1	protein_coding	8.12892	7.50395	8.59265	7.72225	6.53728	7.02047	4.37799	5.44117	4.56448	4.04313	0	7.03621	8.50446	5.18665	0	6.89666	5.01687	11.0716	0	8.25059	4.35745	7.42148	4.50953	5.57377	3.69744	8.6598	8.09618	4.86447	9.29542	10.1867	8.0158	8.73227	3.40585	1.80097	5.29736	4.15439	2.42095	0.506906	6.26844	6.58867	10.4697	0.600669	0
ENSG00000168032	ectonucleoside triphosphate diphosphohydrolase 3 [Source:HGNC Symbol;Acc:3365]	3	40428647	40470110	ENTPD3	protein_coding	5.49698	0	0	0	0	0	0.5711	0	0	0	9.24378	0	0	7.01929	0	0	0	10.0785	0	0	0	0	0	0	0	9.0119	0	0	0	7.1387	0	6.54094	0	1.57901	6.58873	0.61277	0.226328	0	0	0	0	1.36172	0
ENSG00000232386		15	101389766	101402376	RP11-66B24.2	lincRNA	6.04073	5.77727	4.87291	4.12595	4.43914	3.85244	5.91822	5.0284	4.74578	5.22809	3.90475	5.38697	5.17109	6.99876	4.1727	4.13712	5.66537	6.71486	6.51616	3.59577	5.42838	5.69335	6.34077	2.28139	4.77762	6.72244	6.77059	3.47981	5.84618	6.58835	4.84132	6.26866	5.61053	3.89228	5.67171	4.20328	4.03716	4.78785	6.4156	5.69654	6.49894	4.17534	5.3875
ENSG00000058668	ATPase, Ca++ transporting, plasma membrane 4 [Source:HGNC Symbol;Acc:817]	1	203595689	203713209	ATP2B4	protein_coding	6.67455	6.79187	0	3.31861	4.75305	6.26634	7.59746	6.35276	0	0	0	3.85291	1.00735	7.26662	4.16239	0.44384	8.47021	0	4.9035	5.89878	7.06022	5.93276	8.97489	4.23092	6.64292	4.4169	3.21428	8.22616	4.00846	0	8.12585	4.73113	0	6.53805	4.29116	7.02373	2.99428	7.64178	3.46065	0	2.48183	7.89191	4.15516
ENSG00000084731	kinesin family member 3C [Source:HGNC Symbol;Acc:6321]	2	26149471	26205618	KIF3C	protein_coding	0	5.28329	0.737545	0	7.17802	0	1.37424	0	0	0	0	2.83051	0	6.65626	0	0	0	0	0	4.90044	3.38033	0	0	0	0	0	0	5.44742	0	1.78023	0	4.80836	5.76696	6.30405	0	3.15993	6.25447	0	0	0	0	0.600669	0
ENSG00000197958	ribosomal protein L12 [Source:HGNC Symbol;Acc:10302]	9	130209953	130213684	RPL12	protein_coding	9.0763	7.5515	9.34732	8.35598	9.16125	8.84289	7.89318	7.05033	7.50418	7.17827	7.25894	6.96763	8.31549	8.86641	7.27286	8.8471	6.59464	5.13015	8.92757	8.27675	5.78499	8.3716	8.1367	7.13238	6.69859	8.62384	7.26554	8.90211	9.32716	8.29614	7.4671	9.60301	7.50908	9.59003	8.42668	6.73248	8.33585	7.9893	8.3371	6.04982	8.68822	8.01726	7.23054
ENSG00000171564	fibrinogen beta chain [Source:HGNC Symbol;Acc:3662]	4	155484108	155492238	FGB	protein_coding	0	0	0	0	0	0	0	0	0	0	0	0	0	0	0	0	0	0	0	0	0	0	0	5.99226	0	0	0	0	0	0	0	0	0	0	0	0	0	3.52669	0	0	0	0	0
ENSG00000164733	cathepsin B [Source:HGNC Symbol;Acc:2527]	8	11700033	11726957	CTSB	protein_coding	9.89025	9.09006	9.74181	9.9876	10.1568	10.4327	10.3205	9.48927	8.55955	10.1448	7.03726	8.10149	8.61414	6.6312	7.50365	9.21088	9.41273	8.63274	11.4606	9.93946	9.50057	10.2807	5.4088	9.78698	10.628	6.27865	8.43037	6.42223	8.33254	10.1103	9.69084	6.56417	4.7411	4.98728	7.7334	8.55348	11.1711	8.23793	7.07626	4.99899	5.73761	8.25711	8.67625
ENSG00000136319	tetratricopeptide repeat domain 5 [Source:HGNC Symbol;Acc:19274]	14	20724717	20774153	TTC5	protein_coding	2.5402	0.686509	2.10545	0	1.59963	2.10421	6.75217	1.90066	3.0357	8.91249	0	1.24946	0.30141	1.3571	0	5.90872	7.29714	1.50984	2.27259	0	3.08121	0.999716	0	0.36897	5.37811	2.16477	1.21325	3.41048	9.6002	2.39532	3.01936	0	7.36319	0	1.98786	10.1342	0	1.68457	1.76148	1.25817	0	0	4.08104
ENSG00000261542		8	64128539	64130592	RP11-16E18.3	lincRNA	0	0	0	0	0	0	3.28655	1.35612	0	0	0	0	0	0	6.14602	0	0	0	0	0	0	2.09673	0	0	0	0	0	0	0	0	0	3.3914	0	0	0	8.53079	0	0	0	0	0	0	0
ENSG00000132466	ankyrin repeat domain 17 [Source:HGNC Symbol;Acc:23575]	4	73939093	74124515	ANKRD17	protein_coding	6.28664	4.40062	3.06017	6.73623	4.75305	6.6715	6.21425	8.58486	0.891542	7.19342	0.786113	6.76279	8.91851	3.8359	0.95549	5.80099	5.30622	2.77668	5.34297	8.71433	5.19516	0	6.11575	7.40717	7.2442	6.76102	3.1117	5.01068	5.45693	8.17451	7.53199	7.04129	6.10161	4.201	9.1782	8.05596	1.45528	1.63459	5.15939	1.10139	1.33838	7.78449	7.5889
ENSG00000112379	KIAA1244 [Source:HGNC Symbol;Acc:21213]	6	138483058	138665800	KIAA1244	protein_coding	4.92347	10.0111	7.882	8.99608	10.5665	8.31227	8.56478	9.12485	7.85731	10.0914	9.27197	9.40519	8.89116	8.62596	10.4075	7.42366	10.0643	9.12085	2.49151	10.657	10.2215	8.35557	8.27068	8.69737	9.61133	0.776213	10.1096	7.38679	5.5476	5.44797	8.39697	9.05344	6.0233	7.82047	7.90961	8.45996	10.8596	4.19036	5.63427	4.28469	5.80819	11.0495	6.00583
ENSG00000167601	AXL receptor tyrosine kinase [Source:HGNC Symbol;Acc:905]	19	41725108	41767671	AXL	protein_coding	1.94016	2.24915	1.05733	0	0	0.555623	2.59827	1.23944	2.46677	2.84383	1.67582	3.07756	2.85962	3.28913	0.731703	1.25293	2.83552	4.49108	8.67681	0	2.47647	10.2668	1.92274	0	1.85406	3.88754	0	2.41557	0.815102	2.11424	3.59695	3.90117	0.929158	0	1.00059	1.31135	0.530303	0	2.82897	3.94597	3.48495	0	2.52257
ENSG00000151929	BCL2-associated athanogene 3 [Source:HGNC Symbol;Acc:939]	10	121410882	121437331	BAG3	protein_coding	0	0	0	2.38529	0	0	0	0	0	0	3.32988	0	0	0	0	0	0	0	4.10778	0	0	0	0	0	6.43799	6.52447	0	0	0	8.16536	0	0	6.23829	3.16198	6.58927	1.8663	0	0	0	0	1.33838	0	3.76687
ENSG00000113369	arrestin domain containing 3 [Source:HGNC Symbol;Acc:29263]	5	90664541	90679176	ARRDC3	protein_coding	8.15354	5.81223	8.35165	6.62485	8.40608	0	6.61664	0	2.14425	5.49054	9.44986	6.14346	6.74923	7.89105	0	10.066	9.0828	8.26609	0	10.2739	9.37493	11.9397	9.60894	0	0	9.71867	7.86731	7.94155	8.22225	8.86434	7.71824	4.91697	6.99786	7.38343	8.97328	3.98344	0	9.8189	10.0421	0	8.04403	9.95721	8.45484
ENSG00000152578	glutamate receptor, ionotropic, AMPA 4 [Source:HGNC Symbol;Acc:4574]	11	105480721	105852819	GRIA4	protein_coding	5.86697	0	0	0	0	0	0	0	0	0	0	0	0	5.12912	0	0	0	0	0	0	0	0	0	0	0	0	0	0	0	0	0	0	6.68355	0	0	0	0	0	0	0	7.74829	0	0
ENSG00000171503	electron-transferring-flavoprotein dehydrogenase [Source:HGNC Symbol;Acc:3483]	4	159593277	159630775	ETFDH	protein_coding	8.79736	1.30552	7.12183	0.611701	2.59931	7.9048	7.01698	4.28231	8.46494	4.93816	1.82191	5.20448	0	0	8.49342	5.39616	3.03279	1.11806	2.28316	0.551476	5.70841	1.54732	6.98101	0.401165	3.09261	5.73879	5.31491	0.49515	0.775896	8.70127	5.84893	3.49128	5.13116	3.45196	6.19287	5.64791	3.26849	0.088345	1.05483	0.653344	10.6449	4.90251	0
ENSG00000114374	ubiquitin specific peptidase 9, Y-linked [Source:HGNC Symbol;Acc:12633]	Y	14813160	14972764	USP9Y	protein_coding	5.59028	8.14264	6.14506	4.53472	4.02796	4.31459	4.07753	0	0.773811	8.01589	1.5583	4.31663	1.15863	0	4.13695	1.9392	1.06012	6.77128	3.77435	1.14134	3.28403	0.638915	3.77893	4.78303	3.18947	6.12158	4.26344	2.49658	8.39882	3.42482	5.73234	6.64839	3.29737	4.68545	0.878926	4.12624	3.90079	5.84343	3.72371	5.79434	5.40692	0.677212	7.49843
ENSG00000029363	BCL2-associated transcription factor 1 [Source:HGNC Symbol;Acc:16863]	6	136578001	136610989	BCLAF1	protein_coding	9.78967	8.68465	7.22061	6.31616	5.63234	7.7652	7.03093	7.84991	0	8.85664	8.79789	7.70633	6.90328	10.8367	7.9024	5.91734	6.40379	6.63895	6.68671	8.85733	7.46342	8.37036	10.2684	7.87126	7.7329	7.0281	6.72935	8.69882	7.55659	8.72186	8.81589	4.64953	9.5506	8.69498	9.10943	10.4161	9.38794	9.67397	8.92003	6.4321	6.4364	6.67551	7.57836
ENSG00000058673	zinc finger CCCH-type containing 11A [Source:HGNC Symbol;Acc:29093]	1	203764782	203823252	ZC3H11A	protein_coding	7.24858	8.23682	5.10294	0.611701	2.80572	1.97683	7.49612	9.75609	8.07436	8.50503	9.8358	8.17358	4.3715	9.05867	8.35143	9.36806	8.6988	8.31993	8.3027	10.8052	7.45238	9.86339	0	8.09687	7.8551	9.51962	5.17132	5.64291	8.02736	6.78877	8.91321	6.7483	8.40905	4.4509	8.69526	4.77924	3.72188	6.76029	7.25093	7.95017	9.93569	10.0605	9.40256
ENSG00000198729	protein phosphatase 1, regulatory (inhibitor) subunit 14C [Source:HGNC Symbol;Acc:14952]	6	150464212	150571493	PPP1R14C	protein_coding	4.72231	0	0	0	8.68577	0	0	0	0	0	0	0.493187	0	0	0	0	1.5661	0	0	0	7.09611	0	0	0	7.25614	0	0	0	8.72668	4.88797	4.38958	0	7.73159	0	0	0	0	7.53775	0	0.653344	0	0	0
ENSG00000049618	AT rich interactive domain 1B (SWI1-like) [Source:HGNC Symbol;Acc:18040]	6	157099063	157531913	ARID1B	protein_coding	1.46023	0	3.70178	4.20367	9.09876	5.33173	6.13475	5.00896	7.28735	7.6991	6.28819	6.1682	4.94492	5.03876	0	8.45883	7.86047	2.58896	5.3961	0.551476	4.09902	9.02366	5.41709	1.60408	5.73615	8.57176	0	0	7.50133	3.84714	6.72508	3.05356	3.756	0.581988	8.20873	5.18808	6.08896	10.1309	8.14779	0.653344	0	7.17041	5.17132
ENSG00000052795	folliculin interacting protein 2 [Source:HGNC Symbol;Acc:29280]	4	159690290	159829201	FNIP2	protein_coding	6.10584	8.5473	3.97098	2.5242	5.57305	2.70166	2.0651	0	8.18861	6.32959	3.04338	1.78463	2.81993	0	0	0	6.0237	5.9934	8.02712	8.57157	8.0657	0	8.29441	3.75825	4.90628	6.0698	5.71691	7.86264	5.59004	4.12391	6.29688	7.66733	5.79678	0	5.68202	7.44333	6.88454	6.78187	8.92178	7.86765	6.90974	6.76042	0
ENSG00000109083	intraflagellar transport 20 homolog (Chlamydomonas) [Source:HGNC Symbol;Acc:30989]	17	26655352	26662515	IFT20	protein_coding	6.23801	6.04647	7.81479	4.7832	5.88776	5.77765	6.33171	7.44159	4.83709	7.53514	5.79202	5.6324	5.72105	6.46349	4.7696	4.10909	6.86238	7.16067	6.11825	5.09635	6.7658	6.2107	9.1418	5.37596	6.5565	6.93994	6.35577	4.23179	7.12019	9.10478	6.20911	7.62217	8.59007	5.26555	5.73265	4.65474	3.59139	3.49256	6.53234	5.66725	9.44487	4.57944	7.16888
ENSG00000198242	ribosomal protein L23a [Source:HGNC Symbol;Acc:10317]	17	27046411	27051377	RPL23A	protein_coding	9.48329	8.46428	8.84382	9.15868	10.1212	7.89436	8.71094	8.14763	7.39569	8.77491	9.17689	8.90484	9.0735	8.19028	8.57753	8.75274	7.38524	8.16884	9.92478	9.66209	8.75943	9.45571	8.38295	9.63517	8.37407	8.91852	9.40585	9.09072	9.37571	8.8634	8.78395	9.46614	9.14682	9.90379	10.0607	9.89933	9.31905	10.4031	9.13672	8.31441	8.48181	9.12603	8.46271
ENSG00000099968	BCL2-like 13 (apoptosis facilitator) [Source:HGNC Symbol;Acc:17164]	22	18111621	18213388	BCL2L13	protein_coding	7.59744	1.21552	3.97098	5.51995	2.50093	7.34017	5.66267	7.197	4.51137	4.30542	6.54401	3.76958	6.13328	7.10116	0.112901	7.01389	5.52415	6.03612	8.43907	5.84546	7.71958	1.69336	2.83091	6.4182	6.9224	2.90878	5.40616	1.42681	0	6.45015	1.64574	3.41727	5.72135	8.24285	8.22734	3.18534	2.29857	4.51677	8.38479	2.59609	2.48183	1.34422	0
ENSG00000138801	3'-phosphoadenosine 5'-phosphosulfate synthase 1 [Source:HGNC Symbol;Acc:8603]	4	108511433	108641608	PAPSS1	protein_coding	1.85889	3.26654	0	0	3.05722	0	6.27484	0	8.41873	3.75364	9.75211	5.55622	6.06972	0	5.41412	0	0	0	6.77627	9.21921	9.71905	0	5.02924	0	5.88202	0	2.88166	0	3.24647	4.88797	0	0	5.33046	0	4.53442	3.46658	0	4.014	0	7.47107	0	3.12867	5.57632
ENSG00000120805	ADP-ribosylation factor-like 1 [Source:HGNC Symbol;Acc:692]	12	101786898	101801598	ARL1	protein_coding	8.52343	7.48597	8.52892	9.60223	7.6587	4.75806	7.51194	1.77478	6.43489	8.49779	0.666104	7.89642	6.65837	5.88018	8.59862	9.85942	9.51291	2.12194	0	6.38212	7.97115	8.72773	5.06068	8.96995	1.18054	7.28076	8.38435	5.55497	9.2751	7.19516	5.62492	2.92906	5.4098	6.93365	7.08494	10.1953	0	6.98256	9.131	3.66899	5.99267	2.49768	6.32145
ENSG00000120279	myc target 1 [Source:HGNC Symbol;Acc:23172]	6	153019030	153045702	MYCT1	protein_coding	0	0	0	0	0	0	0	0	0	0	0	0	0	0	0	0	0	0	0	0	0	0	0	0	0	0	0	0	0	0	0	0	0	0	0	0	0	0	0	0	0	0	0
ENSG00000198561	catenin (cadherin-associated protein), delta 1 [Source:HGNC Symbol;Acc:2515]	11	57520715	57587018	CTNND1	protein_coding	8.30503	6.14937	8.47853	5.80525	5.86438	8.5437	3.93836	2.40324	3.87603	0	8.01015	9.35414	4.50586	8.37935	8.3263	2.50662	5.68182	6.40277	7.22601	0	0	3.43871	0.781936	0.36897	6.49957	8.82304	1.54151	1.98365	4.41161	6.96078	0	2.92073	8.65456	3.63563	8.37941	3.07188	2.82727	0.506906	2.92045	9.18871	7.90841	5.02244	7.43383
ENSG00000180730	shisa family member 2 [Source:HGNC Symbol;Acc:20366]	13	26618735	26625169	SHISA2	protein_coding	0	0	0	0	0	1.04572	0	0	0	0	0	0	0	0.614652	0	0	0	0	0	0	0	0	0	0	0	0.646696	0	0	0	2.21981	0	0	0	0	0	0	0	0	0	0	0	0	0
ENSG00000155849	engulfment and cell motility 1 [Source:HGNC Symbol;Acc:16286]	7	36893961	37488852	ELMO1	protein_coding	6.33283	4.21569	1.39779	1.03992	2.05514	1.39687	3.85984	2.24014	1.34685	3.62754	10.7122	3.12753	5.48226	8.07772	2.90197	7.70316	3.54933	2.12747	2.63868	8.70792	3.84802	3.53703	3.45094	5.99424	3.31078	8.79072	2.6799	1.49322	8.89892	9.69554	2.68687	3.40141	7.95764	10.3428	5.60151	8.53902	5.46069	9.55751	10.1385	4.03285	3.67478	2.21436	3.30044
ENSG00000197535	myosin VA (heavy chain 12, myoxin) [Source:HGNC Symbol;Acc:7602]	15	52599480	52821247	MYO5A	protein_coding	4.89339	3.27856	2.52392	0	2.36956	7.96436	3.49651	2.4431	1.4588	7.82861	8.9757	4.90381	1.08153	3.2686	0.980886	5.00392	4.39876	3.91216	10.3836	4.62171	0	3.49151	5.10297	8.94418	5.25234	2.68218	4.09567	7.31069	7.97144	7.25163	5.67885	3.45619	3.80613	3.86006	4.94302	3.95369	6.83587	10.8435	6.80451	0.456624	6.9806	1.35008	6.67518
ENSG00000106565	transmembrane protein 176B [Source:HGNC Symbol;Acc:29596]	7	150488373	150498448	TMEM176B	protein_coding	6.70515	9.825	10.0317	10.7035	7.56035	9.75165	9.25844	10.157	5.49315	9.74181	0	9.68623	9.20569	7.76988	9.3478	3.09839	10.6637	8.68777	8.45406	10.7756	9.16792	0	7.74115	10.8077	10.3447	0	10.0701	9.55291	7.64084	7.13333	9.40747	4.88167	6.14863	0	4.95254	8.62662	9.5196	10.6461	9.3839	8.95393	3.72568	8.77952	9.21721
ENSG00000264112		17	56066400	56072211	RP11-159D12.2	lincRNA	1.25055	0.111679	2.44655	0	0	0.794161	0.882781	0.25229	0	3.98014	0	0	0.754412	1.61401	1.85368	7.55915	0	5.9156	0	0	0.820889	0	2.12187	0	1.64903	0	1.21325	0	3.22262	2.55626	3.34476	0	0	6.27222	3.91603	0.647302	0	5.46868	1.6603	0	0	0.620188	1.07526
ENSG00000142188	transmembrane protein 50B [Source:HGNC Symbol;Acc:1280]	21	34804792	34852318	TMEM50B	protein_coding	3.22029	5.38603	2.11659	7.13668	6.78949	4.78385	6.7922	0.561487	0.547731	5.3083	9.15632	3.85495	4.73109	2.39218	4.21198	0	8.36143	4.00974	2.92946	0	5.47012	5.90673	7.839	2.26048	0	0.702916	3.84569	4.59821	7.39537	7.03752	0.636405	4.17638	1.0958	7.3714	7.73568	5.45568	0	0	5.69571	4.50886	1.43127	0.648982	1.73797
ENSG00000112081	serine/arginine-rich splicing factor 3 [Source:HGNC Symbol;Acc:10785]	6	36562145	36573377	SRSF3	protein_coding	9.17743	7.60113	9.77678	6.51252	5.51121	7.81778	9.02924	9.12691	8.73475	7.39954	8.83955	8.1154	6.80894	9.45567	6.18379	8.56556	9.4028	10.9354	7.86384	4.48651	9.77104	7.75633	7.96535	6.86664	9.6496	7.98118	7.66935	8.07852	9.35587	9.53013	8.39896	8.94173	9.58091	8.43403	9.74178	7.34344	3.90079	7.22914	9.35046	8.98525	7.80856	7.95632	9.4499
ENSG00000260804		2	217081768	217084915	RP11-566E18.3	lincRNA	0	0	0	0	5.81405	0	0	0	0	0	0	0	0	0	0	2.67881	0	0	0	0	0	0	0	0	0	0	0	0	0	1.14887	0	0	0	2.99218	0	10.6445	0	0	0	5.56674	0	0	0
ENSG00000189377	chemokine (C-X-C motif) ligand 17 [Source:HGNC Symbol;Acc:19232]	19	42932440	42947200	CXCL17	protein_coding	0	0	0	0	0	0	0	0	0	0	0	0	0	0	0	0	0	0	0	0	0	0	0	0	0	0	0	0	0	0	0	0	0	0	0	0	0	0	0	0	0	0	0
ENSG00000236008		2	8699963	8723922	AC011747.4	lincRNA	6.32071	7.59234	6.12699	5.55667	5.47797	4.1919	7.11329	7.43132	4.48985	6.81104	3.53133	6.45031	6.58504	7.65187	5.68526	5.1019	7.42425	6.93075	6.49578	5.23425	7.44093	7.18807	7.39253	4.42112	7.30393	7.29117	7.77772	4.48393	7.45809	6.42615	6.97672	7.27433	7.10758	3.99162	5.70026	6.29404	5.42135	5.63887	7.26254	7.00661	7.72597	5.37442	6.07083
ENSG00000125352	ring finger protein 113A [Source:HGNC Symbol;Acc:12974]	X	119004497	119005791	RNF113A	protein_coding	5.46959	0	0	0	1.22131	1.07366	0	0	0	5.04941	7.23812	0	2.71285	0	0	5.93061	0	8.2516	0	4.81664	0	0	0	1.99325	0	3.61397	7.24157	0	0.557475	0	0	0	5.89766	0	6.10013	0	0	0	6.52922	0	2.83081	7.58611	0
ENSG00000124762	cyclin-dependent kinase inhibitor 1A (p21, Cip1) [Source:HGNC Symbol;Acc:1784]	6	36644305	36655116	CDKN1A	protein_coding	5.11756	0	0	0.611701	0	0	4.85127	0	0	0	4.5295	0	0	2.98285	0	0	0	0.876649	8.52535	0	0	0	0	2.9454	0	8.67519	0	0	6.88239	6.19841	3.72224	0	5.33046	8.38769	7.66506	1.64005	7.88907	0	6.56402	0	2.02054	0	4.99235
ENSG00000136854	syntaxin binding protein 1 [Source:HGNC Symbol;Acc:11444]	9	130374544	130457460	STXBP1	protein_coding	8.44575	6.64214	4.56617	4.16172	5.35569	9.07728	8.38625	6.73197	8.82048	7.60969	6.87369	7.55822	7.07524	6.2956	2.86029	3.37375	9.54593	9.60004	0	8.75065	10.0886	1.39983	1.28621	9.64772	3.9536	8.51936	0	7.93161	3.01353	4.55594	8.79083	4.26727	8.74741	3.07958	8.92073	3.24292	1.66794	10.2761	8.79174	2.32472	4.27383	8.81138	7.71934
ENSG00000172197	membrane bound O-acyltransferase domain containing 1 [Source:HGNC Symbol;Acc:21579]	6	20100935	20212670	MBOAT1	protein_coding	2.65598	1.8335	2.24603	0	0.7534	0	2.41873	2.19539	1.28996	1.8002	1.29423	1.58352	2.56676	0	0	0	1.88229	2.33536	2.03777	1.23564	2.36791	2.05941	3.20976	1.02059	1.88884	2.17746	3.24271	0	2.03195	3.52434	0	2.22441	1.90778	0.955433	2.23561	1.9157	0.777583	2.35184	2.14624	3.89189	3.54097	0	0
ENSG00000005486	rhomboid domain containing 2 [Source:HGNC Symbol;Acc:23082]	7	75471920	75518244	RHBDD2	protein_coding	4.59739	6.18708	6.38801	7.32144	8.42855	5.08887	5.74272	6.31085	8.11709	7.19342	9.62022	7.18666	3.82097	7.97568	5.99132	6.7595	7.96984	5.60461	1.33492	7.9636	0.741889	0.628758	0	0.662535	6.58727	8.46959	7.6466	8.6405	9.84007	8.01392	6.82017	4.26727	0	3.79905	7.97443	9.14915	8.54615	0.506906	8.88811	7.44285	7.0824	8.70114	8.43939
ENSG00000159131	phosphoribosylglycinamide formyltransferase, phosphoribosylglycinamide synthetase, phosphoribosylaminoimidazole synthetase [Source:HGNC Symbol;Acc:4163]	21	34876238	34915797	GART	protein_coding	3.77318	7.65562	0	2.6509	1.58369	2.22806	4.44386	1.40581	2.79385	7.93049	0	1.61457	7.3008	3.99094	0.446968	0	7.11157	4.59006	2.45991	0	7.36417	2.87398	4.02383	6.09412	2.05339	2.51381	1.78762	0.533523	7.96693	4.82461	2.46724	2.50799	4.09581	4.77929	1.63668	3.78948	0	0.494026	1.12272	1.72614	0	3.12952	8.49649
ENSG00000236824	brain cytoplasmic RNA 1 [Source:HGNC Symbol;Acc:1022]	2	47558199	47571656	BCYRN1	lincRNA	6.13471	6.72899	4.65598	3.8172	4.77357	6.32425	6.46912	6.3218	5.95913	6.25926	4.53108	5.61858	6.19207	7.2753	5.29975	6.27182	6.79272	7.43305	7.10288	5.38009	6.91207	6.23256	6.72412	5.44996	6.66799	7.53327	7.68037	4.84511	6.03972	6.86277	6.27897	7.19069	6.52796	4.86714	6.26165	7.45782	4.88437	7.14539	6.86894	6.64036	7.67519	6.69965	6.98251
ENSG00000198586	tousled-like kinase 1 [Source:HGNC Symbol;Acc:11841]	2	171847333	172087824	TLK1	protein_coding	10.3672	9.26706	1.87552	7.78231	3.69868	9.81885	9.60519	9.75432	7.17659	8.81244	10.0115	8.82588	8.58067	10.4492	9.87255	10.9613	10.2248	8.60345	9.78891	7.61872	10.3361	8.3415	10.3366	8.41897	9.56822	8.13696	9.54359	10.2716	10.3897	9.13812	9.24295	3.17518	9.76378	9.90545	9.62071	4.36318	1.45528	10.5157	10.1619	9.5556	2.48183	8.83115	8.41196
ENSG00000161016	ribosomal protein L8 [Source:HGNC Symbol;Acc:10368]	8	146015150	146017972	RPL8	protein_coding	9.27549	8.67251	9.48593	9.64187	8.84881	7.61933	8.23815	9.1558	7.56978	8.56471	10.4277	8.18777	8.96882	8.50911	8.48093	10.1127	7.77264	10.1724	9.68155	9.19076	8.86712	8.00971	8.39651	9.40016	7.78329	8.70873	9.21906	7.82285	9.88467	9.11297	9.33871	9.01484	7.31367	10.209	8.33458	9.84913	8.77135	10.4293	9.12865	8.90477	5.45296	8.88886	8.3698
ENSG00000153201	RAN binding protein 2 [Source:HGNC Symbol;Acc:9848]	2	109335937	109402267	RANBP2	protein_coding	6.8179	8.88147	2.32309	0.758524	7.1876	7.96519	4.75799	8.97019	6.65897	4.37758	10.0939	7.64476	6.98643	8.56297	2.74778	8.8204	7.6396	6.72311	7.16874	5.7007	8.12837	9.02159	9.04774	0	6.61202	8.29193	6.27785	9.24975	9.54729	9.31401	8.22157	6.5833	8.92703	7.18848	10.1088	1.04151	4.15436	0.881272	8.98514	7.6204	6.92434	1.38187	6.25567
ENSG00000158615	protein phosphatase 1, regulatory subunit 15B [Source:HGNC Symbol;Acc:14951]	1	204372515	204380919	PPP1R15B	protein_coding	1.70464	7.81072	1.01031	4.12726	0.965009	1.90088	6.8382	0.599117	1.92949	4.61783	3.33455	5.67157	0	3.61853	7.76417	8.82763	2.1025	1.60412	9.78995	5.68094	7.57033	2.6323	2.53213	0.594552	1.78715	5.56475	3.43171	4.83512	7.75977	5.85508	3.74628	2.51722	7.4701	0	8.77539	1.53858	0.525946	0	6.21833	1.21255	6.25251	8.49398	0.934258
ENSG00000034693	peroxisomal biogenesis factor 3 [Source:HGNC Symbol;Acc:8858]	6	143771944	143811147	PEX3	protein_coding	7.06262	0	0	0	0	0	0	0	0	4.42498	0	7.76967	0	8.58292	0	3.80404	8.02881	0	4.19031	0	7.06747	3.8186	0	5.05956	3.38576	1.93655	0	0	7.57098	6.65574	3.89349	0	0.64953	3.5154	0	2.52675	0	8.15357	0	0	0	1.8408	0
ENSG00000102007	proteolipid protein 2 (colonic epithelium-enriched) [Source:HGNC Symbol;Acc:9087]	X	49028273	49031588	PLP2	protein_coding	7.40958	7.29802	8.96434	5.03049	3.36751	6.09101	6.62679	4.05308	0	7.4865	5.72236	7.29172	6.87251	5.89314	5.56486	5.90872	6.03813	3.46379	6.78957	7.2465	6.48787	0	5.97433	3.98759	7.53634	7.55552	4.65569	6.70628	6.97185	4.91733	7.24613	5.59892	4.1747	8.04094	7.6262	7.32451	7.50228	7.49799	7.60954	4.43437	2.47391	1.61621	8.69979
ENSG00000171634	bromodomain PHD finger transcription factor [Source:HGNC Symbol;Acc:3581]	17	65821640	65980494	BPTF	protein_coding	4.56226	8.47993	7.77623	7.79159	7.82724	5.98556	5.36422	9.60451	6.35658	7.34225	9.6945	4.69268	8.07411	3.72436	8.72675	6.74018	7.62146	10.5387	5.2786	8.66223	7.09121	6.74105	6.0557	2.59357	6.01982	4.72525	7.96451	2.67881	8.95972	7.54831	7.49256	9.12164	3.69397	7.00118	8.79222	10.2381	8.12566	9.27314	6.39263	8.40723	9.98875	8.04925	8.24651
ENSG00000124574	ATP-binding cassette, sub-family C (CFTR/MRP), member 10 [Source:HGNC Symbol;Acc:52]	6	43395104	43418168	ABCC10	protein_coding	6.45746	6.7965	4.59673	4.57171	4.86968	5.05979	6.41698	6.28417	5.14841	5.7609	5.35471	5.75014	5.75139	7.13906	3.59192	4.61983	6.97251	6.94267	6.3092	4.0829	7.12294	6.19777	7.08741	4.36448	6.55737	7.15283	6.84841	4.27364	6.27426	6.77408	6.37133	8.12183	6.71004	4.87864	6.04986	8.70995	5.20095	5.89925	6.8618	6.61664	7.52415	5.43043	5.98831
ENSG00000122026	ribosomal protein L21 [Source:HGNC Symbol;Acc:10313]	13	27825446	27830828	RPL21	protein_coding	9.77392	8.97303	9.20226	9.03293	9.72601	8.45918	9.46274	8.119	8.57713	8.48042	9.67449	8.83078	9.37269	9.16466	9.53123	8.89768	8.84798	9.61707	10.1261	9.18562	9.34513	9.28252	8.91713	8.97098	9.39198	8.9429	8.4929	8.39173	10.0262	9.56557	9.16039	9.51167	9.78307	10.1626	10.3758	9.44227	9.9105	10.4795	9.30981	9.41147	9.82058	9.28591	9.20242
ENSG00000139289	pleckstrin homology-like domain, family A, member 1 [Source:HGNC Symbol;Acc:8933]	12	76419227	76427712	PHLDA1	protein_coding	0.537065	1.28864	0.869868	0	0	0.454918	2.21858	1.75491	0	6.32582	2.12117	3.15419	7.15195	2.16156	1.89556	0	3.96678	1.21996	10.6713	0	0.900992	9.83559	1.14786	2.80266	5.18646	1.55022	2.33484	1.46922	1.16081	2.14831	1.38289	1.35358	1.37103	0.591535	0.682828	1.4932	4.01129	0.900922	3.36414	0.653344	0	7.31544	3.91137
ENSG00000128989	cAMP-regulated phosphoprotein, 19kDa [Source:HGNC Symbol;Acc:16967]	15	52839242	52862080	ARPP19	protein_coding	7.90721	7.51596	3.16586	7.48988	3.8179	5.89343	6.739	4.7568	7.13462	6.22152	7.23988	7.83753	5.9195	8.87832	5.91978	4.6249	3.93384	7.24595	6.74439	8.50114	6.90335	6.75622	4.92308	3.23965	6.71928	8.44975	5.07292	6.2595	5.97974	5.61496	7.11338	4.45718	6.94364	8.34072	7.75004	3.86268	4.94519	8.07689	7.20025	5.79895	6.18227	7.78945	8.19135
ENSG00000084754	hydroxyacyl-CoA dehydrogenase/3-ketoacyl-CoA thiolase/enoyl-CoA hydratase (trifunctional protein), alpha subunit [Source:HGNC Symbol;Acc:4801]	2	26413504	26467594	HADHA	protein_coding	6.28664	9.2825	4.3937	8.85669	6.68462	6.51239	6.9681	8.72441	0.51357	6.56091	0	4.73745	7.90118	4.81202	4.37323	4.91542	5.99442	8.46011	3.60476	6.40608	6.17574	8.5514	8.4861	6.03136	7.74998	6.977	3.78098	0	7.80198	8.75273	6.22385	4.60693	2.31632	6.72585	7.99152	5.65004	0	0	6.95484	7.72652	7.89449	3.43456	0
ENSG00000213121	Uncharacterized protein; cDNA FLJ59044, highly similar to LINE-1 reverse transcriptase homolog [Source:UniProtKB/TrEMBL;Acc:B7Z5F2]	6	153552455	153668623	AL590867.1	protein_coding	7.41994	7.83595	6.23601	5.25975	4.89959	5.60682	7.10614	6.94088	6.27218	6.81897	3.868	6.77342	7.13562	8.24851	5.29089	4.46208	7.81952	8.06299	6.93746	5.74984	6.96568	6.52771	6.87544	5.55645	7.40185	8.21589	7.54175	5.03484	6.74481	6.80841	7.35943	8.36732	6.61916	6.51996	5.47989	7.53431	4.86811	8.07993	6.11157	7.1605	7.76887	5.44282	7.33741
ENSG00000062598	engulfment and cell motility 2 [Source:HGNC Symbol;Acc:17233]	20	44994688	45061704	ELMO2	protein_coding	0	5.36606	0	4.32266	0	0	0	4.01878	0	0	9.67686	0	7.40689	9.17593	0	0	6.56187	1.41803	8.27181	2.99707	1.22942	0	0	0	2.59485	9.72832	3.56425	0	4.00846	5.84823	0	5.25713	5.98987	3.79905	9.18267	0.61277	0	0	4.31042	0	0	0	0
ENSG00000219073	chymotrypsin-like elastase family, member 3B [Source:HGNC Symbol;Acc:15945]	1	22303514	22325135	CELA3B	protein_coding	0	0	0	0	0	0	0	0	0	0	0	0.837194	1.04668	0.841145	0	0	0	0	0	1.21553	0	0	0.435654	0	0	0	0	0	0	0.416609	0	0	0	0	1.12076	0	1.14738	0	0	0	2.49753	2.20308	0
ENSG00000136631	vacuolar protein sorting 45 homolog (S. cerevisiae) [Source:HGNC Symbol;Acc:14579]	1	150039369	150117505	VPS45	protein_coding	3.90806	0	0	5.64701	0	0	2.71657	4.38471	0	7.53394	0	3.43045	0	4.57538	3.65351	9.24615	0	6.29935	8.52336	7.80445	2.94928	2.91739	6.72843	4.35937	1.53131	5.36303	7.49692	0	0	3.42482	0	0	8.96987	0	3.23113	5.7385	0	0.506906	5.91808	2.97705	4.27952	0	0
ENSG00000085719	copine III [Source:HGNC Symbol;Acc:2316]	8	87497059	87573726	CPNE3	protein_coding	9.58692	10.0037	7.85319	8.01215	7.37604	4.73836	8.01211	7.34391	6.86352	8.68165	8.28269	7.38613	9.06039	5.25487	8.05964	4.69238	9.3387	5.70051	5.15025	8.38123	6.91505	6.85436	8.47152	9.83659	9.92865	7.9419	8.86815	8.16594	8.64913	5.29823	8.40606	0.790987	7.61088	7.26724	7.61742	10.0192	8.57774	6.88311	8.72304	9.50304	7.41518	8.36162	8.39404
ENSG00000227051	chromosome 14 open reading frame 132 [Source:HGNC Symbol;Acc:20346]	14	96505661	96560417	C14orf132	protein_coding	7.18831	5.108	3.97711	5.52078	5.12386	7.09196	1.99767	0.887667	0	5.35835	3.51771	5.11976	9.30598	8.99899	2.36673	9.93806	5.04571	5.65455	1.20119	9.21129	2.25661	5.01245	0.757586	4.77045	5.62688	7.75613	7.86888	5.4334	4.83859	4.82461	5.57058	6.27453	4.78758	7.74499	4.86625	9.1798	1.93604	2.96332	8.70701	0.653344	8.53213	8.74349	0
ENSG00000142789	chymotrypsin-like elastase family, member 3A [Source:HGNC Symbol;Acc:15944]	1	22328149	22339032	CELA3A	protein_coding	0	0	0	0	0	0	0	0	0	0	0	0	0	0.841145	0	0	0	0	0	0	0	0	0.435654	0	0	0	0	0	0	0	0	0	0	0	0	0	0	0	0	0	0	0	2.82227
ENSG00000152700	SAR1 homolog B (S. cerevisiae) [Source:HGNC Symbol;Acc:10535]	5	133936834	133984961	SAR1B	protein_coding	8.63893	9.73587	8.14239	7.5219	5.5887	8.61296	9.45869	7.61832	5.33694	8.69944	9.66673	8.15476	8.24749	9.19078	7.93991	9.34201	10.4415	9.84177	6.68457	6.73246	8.18136	8.07829	4.90761	9.32826	8.30871	9.5672	8.18134	5.24696	8.45954	6.95187	9.32739	8.48403	9.37959	4.49385	10.2965	7.18756	6.02411	9.55181	10.1777	6.58333	6.09398	6.79834	9.46514
ENSG00000138796	hydroxyacyl-CoA dehydrogenase [Source:HGNC Symbol;Acc:4799]	4	108910870	108956331	HADH	protein_coding	7.74019	0	0	0	0	0	0	0	0	0	9.80506	0	0	8.34911	0	10.2394	0	7.96187	0	0	0	3.97712	0	0	0	8.85335	0	5.60587	10.8074	9.45579	3.72224	9.0688	7.31367	9.19075	10.6297	4.24736	0	0.881272	8.14779	0	9.34243	0	0.552999
ENSG00000198625	Mdm4 p53 binding protein homolog (mouse) [Source:HGNC Symbol;Acc:6974]	1	204485511	204542871	MDM4	protein_coding	6.98739	6.45714	6.6764	4.83055	6.38826	5.23845	7.88678	7.14567	4.59849	8.13665	3.9051	6.66681	6.98919	6.37568	5.13741	7.97013	9.40975	7.5827	7.50479	8.27271	8.81724	8.93225	7.40941	6.16855	8.02381	7.8717	8.23026	8.06226	8.41468	5.33503	7.38008	5.84677	6.04695	7.8488	5.74786	6.45542	5.04544	4.2362	5.7133	6.79504	8.4381	3.97718	6.10677
ENSG00000197771	minichromosome maintenance complex binding protein [Source:HGNC Symbol;Acc:25782]	10	121588972	121652068	MCMBP	protein_coding	1.59599	2.32394	0	0.611701	4.08	0	4.96597	1.74319	0	2.17048	6.16979	0	0.589865	2.21205	0	3.42303	0.725676	3.00118	3.54328	0	1.23355	6.86115	0	0	0.705012	6.61258	0	7.16247	5.34419	2.01126	0.671984	1.73215	1.95085	0	5.63059	4.28701	0	0	1.79369	4.13845	1.25767	0	2.09421
ENSG00000145425	ribosomal protein S3A [Source:HGNC Symbol;Acc:10421]	4	152020725	152025804	RPS3A	protein_coding	9.64252	8.7611	9.32712	9.01369	8.97824	8.92518	8.21731	9.34407	9.07039	8.23091	9.96723	9.64275	9.60054	8.83361	7.83674	9.40652	7.56496	8.22636	10.3883	10.6191	9.08461	8.57018	8.03428	9.36046	9.22801	8.92056	8.95569	9.00457	10.2691	10.4783	9.74979	10.7495	9.35466	10.1391	9.90131	9.96671	9.72818	9.72603	10.1657	9.19719	8.66531	8.45324	9.36455
ENSG00000135144	deltex homolog 1 (Drosophila) [Source:HGNC Symbol;Acc:3060]	12	113494514	113535833	DTX1	protein_coding	0	0	0	0	0	0	0	0	0	0	0	0	0	0	0	0	0	0	6.43918	0	0	0	0	0	0	0	0	0	0	0	0	0	0	0	0	0	0	0	0	0	0	0	0
ENSG00000159140	SON DNA binding protein [Source:HGNC Symbol;Acc:11183]	21	34914924	34949812	SON	protein_coding	9.55167	9.4006	6.48707	5.70658	8.32099	7.10047	6.99094	7.09254	6.74769	8.09693	7.22148	7.90922	6.55715	9.75087	6.15035	8.14595	7.14314	8.40138	7.91482	5.86357	7.22852	7.18672	8.67049	7.12062	6.82329	7.41237	5.32182	9.10519	8.54993	8.19892	8.84377	9.93921	10.4791	8.71334	8.11909	9.53913	6.89006	9.8852	8.95936	9.01216	6.85991	4.95198	5.29492
ENSG00000163913	intraflagellar transport 122 homolog (Chlamydomonas) [Source:HGNC Symbol;Acc:13556]	3	129158968	129239198	IFT122	protein_coding	3.22029	3.87376	0	0.871098	0	0.477912	6.31406	0	0.487408	6.95495	0	4.62066	0.589865	4.72776	7.16756	8.7433	0	0	1.01808	2.95091	4.13204	0	2.20075	1.60408	6.52041	1.03303	2.0718	0	0	1.49882	5.67353	0	6.57587	0	1.13657	0.864136	8.44701	3.02804	9.74924	3.57087	0	0	0.562157
ENSG00000225339		6	34247456	34254545	RP11-513I15.6	lincRNA	10.3018	9.06552	9.8041	8.46229	9.20794	4.78827	6.91312	8.22171	8.44584	6.59962	8.8697	5.42538	8.15377	7.86272	8.86902	10.0933	8.75179	9.66225	8.08376	9.66342	8.25811	3.64112	2.22981	7.57217	8.71668	6.51022	7.07755	10.4653	9.50912	5.40923	5.92304	5.32204	3.1918	10.2644	7.17343	8.67305	1.95561	0	5.50761	3.28747	6.2689	9.12138	9.42235
ENSG00000176871	WD repeat and SOCS box containing 2 [Source:HGNC Symbol;Acc:19222]	12	118470712	118500235	WSB2	protein_coding	8.31823	4.09567	7.55567	9.04361	9.77049	5.6942	5.88556	8.25697	6.10821	6.64252	7.78338	6.88408	5.0142	2.06596	5.70419	6.45636	6.81835	9.11872	5.04329	5.78156	7.39048	6.29582	7.24925	7.91752	6.07035	7.52124	7.34134	7.50285	5.44323	6.18676	8.35923	5.76311	6.9256	9.56613	6.95271	6.81644	6.80277	5.88504	6.74129	3.26185	5.5503	5.8787	6.21606
ENSG00000066136	nuclear transcription factor Y, gamma [Source:HGNC Symbol;Acc:7806]	1	41157320	41237275	NFYC	protein_coding	1.34807	0	0	2.87513	7.63946	0	3.12478	1.08622	0.621758	0.530655	0.449781	0.407125	0	8.2197	0	0	5.58789	2.28179	7.49715	0	4.10861	5.25441	0.781936	0	2.19314	0	6.83953	2.8252	1.8324	3.20818	0.636405	8.44263	6.54247	0.76186	4.64222	1.67394	0	0.423319	1.63864	2.14954	0	0.519836	0
ENSG00000050030	KIAA2022 [Source:HGNC Symbol;Acc:29433]	X	73952684	74145282	KIAA2022	protein_coding	6.68687	0	7.22705	0	0	0	0	0	0	1.99899	1.96262	0	0	0	0	9.75082	0	0	0	0	0	0	0	0	0	3.06221	0	0	0	0	0.636405	0	0	0.995536	0	0	0	0	0.667922	0	2.02054	0	0
ENSG00000079246	X-ray repair complementing defective repair in Chinese hamster cells 5 (double-strand-break rejoining) [Source:HGNC Symbol;Acc:12833]	2	216972187	217071026	XRCC5	protein_coding	8.87104	6.99408	7.50128	6.72186	8.61158	5.38339	8.24195	9.43963	4.56448	8.13052	9.57366	8.47729	7.85694	6.74467	7.05997	9.07073	8.57036	4.99711	8.37245	6.46048	8.30226	9.60214	8.90949	7.65258	8.83281	9.1845	8.30231	9.37081	8.99822	7.34798	8.65455	8.52195	8.7282	8.76587	9.51123	11.2159	4.02177	9.45092	3.46065	9.58172	7.32177	9.91539	8.52055
ENSG00000163660	cyclin L1 [Source:HGNC Symbol;Acc:20569]	3	156864297	156878549	CCNL1	protein_coding	5.13565	7.19989	6.76962	0.611701	4.52174	1.83562	3.02953	8.96182	5.25548	2.32085	0	6.98792	0	6.07465	6.5687	3.56152	7.94709	8.69652	8.21872	4.36139	4.96608	8.03397	2.75606	7.75539	7.94329	4.87179	5.31676	7.37183	2.25506	1.49882	8.47287	0	0	0.581988	6.88095	5.05662	7.15086	5.11603	0	8.50389	10.788	6.15447	5.88079
ENSG00000180957	phosphatidylinositol transfer protein, beta [Source:HGNC Symbol;Acc:9002]	22	28247657	28316122	PITPNB	protein_coding	6.00124	0	0	1.03992	0	0	0	5.79698	0	0	0	0	0	6.17351	5.39278	8.18833	5.62562	4.8791	5.56028	0	5.29737	2.56465	0	0	6.30633	5.64977	8.17136	8.83441	7.24737	5.40571	5.94099	0	1.0958	9.27184	5.231	0	7.48485	10.2324	5.25147	6.63696	1.33838	0	6.36249
ENSG00000153147	SWI/SNF related, matrix associated, actin dependent regulator of chromatin, subfamily a, member 5 [Source:HGNC Symbol;Acc:11101]	4	144434616	144478639	SMARCA5	protein_coding	7.96597	3.01483	1.87552	8.71158	4.95235	4.83947	7.38617	0.475076	6.41334	4.85469	8.51341	6.43388	8.95127	6.73758	4.77076	4.95097	5.54732	7.35054	8.26333	5.75693	6.75363	6.09142	7.70704	5.38544	5.62356	5.67937	5.58948	5.63067	5.86136	9.0514	6.19138	1.29896	8.45185	9.82748	6.14114	9.72486	3.14395	4.54306	8.78457	9.06457	5.77111	5.9038	6.7442
ENSG00000133789	SWAP switching B-cell complex 70kDa subunit [Source:HGNC Symbol;Acc:17070]	11	9685624	9774538	SWAP70	protein_coding	1.14881	3.52541	2.3403	0	2.08488	2.59001	3.46253	3.20065	2.48892	3.06577	8.43387	3.15552	6.96074	2.06413	0.600823	4.08785	5.76446	3.68061	6.25059	0.636029	7.19951	7.90504	9.27928	2.68206	2.93868	4.27449	3.24077	1.82253	2.8343	3.87793	3.15575	3.76985	2.86804	5.30326	2.6229	0	1.46896	0	2.30421	2.65501	2.75442	2.85566	4.24249
ENSG00000260539		16	74481325	74483790	RP11-252A24.7	lincRNA	9.92055	8.2671	7.97252	0.776425	6.61008	0.5484	8.90008	9.10748	2.67718	8.78015	5.30283	4.48099	1.23801	8.42376	5.37841	8.83945	1.77616	2.06542	8.88748	2.17923	4.21638	9.29284	8.40844	0	8.28355	7.79048	8.35518	1.98979	8.15809	7.12712	5.72101	5.54376	7.97385	6.13258	9.54718	2.12445	6.34737	3.84846	8.59989	9.44487	3.20065	8.41738	5.75266
ENSG00000152520	PAN3 poly(A) specific ribonuclease subunit homolog (S. cerevisiae) [Source:HGNC Symbol;Acc:29991]	13	28712643	28869475	PAN3	protein_coding	0.907477	6.37868	0	4.16172	8.28196	2.61788	6.58109	7.35082	0	0	7.92885	6.00383	6.44075	4.54287	7.95976	6.87025	7.85641	4.55918	6.59121	0	0	4.29071	8.66549	0	7.79562	8.59727	0.711054	0	7.30875	3.15593	6.22385	0	7.87828	8.25318	2.92452	7.55715	0	0	6.68453	7.95017	2.02054	8.88098	5.39601
ENSG00000140450	arrestin domain containing 4 [Source:HGNC Symbol;Acc:28087]	15	98462784	98517068	ARRDC4	protein_coding	0	9.00668	0	0	5.48999	0	5.10595	5.3219	0	0	0	9.25335	0.589865	0	0	0	0	0	0	0	7.11722	0	6.13064	6.05051	0	0	0	0.508055	0	3.34064	7.58294	5.68335	0	0	0	0	0	0	0	0	0	0	0
ENSG00000231500	ribosomal protein S18 [Source:HGNC Symbol;Acc:10401]	6	33239787	33244287	RPS18	protein_coding	9.78273	8.98832	8.98156	8.17916	10.2431	8.40872	8.11951	9.40377	8.377	9.05017	8.9838	9.05739	8.84593	7.09434	8.21055	8.93752	7.82202	9.52495	10.3626	9.62941	9.42556	8.59473	9.33392	8.30528	8.84486	9.28994	8.52992	7.20069	9.50377	8.77885	9.28461	9.45542	8.14203	9.79055	9.99833	9.82709	8.8374	8.40682	9.36135	9.05055	9.11075	8.06603	9.52875
ENSG00000112419	phosphatase and actin regulator 2 [Source:HGNC Symbol;Acc:20956]	6	143857982	144152322	PHACTR2	protein_coding	9.51613	8.7337	0.737545	0	6.75745	9.16193	2.55788	7.92174	0	7.7105	8.49524	7.20523	2.81165	1.87024	9.07343	7.43929	9.69633	5.32419	9.41606	5.27038	8.49496	8.58057	9.24033	0.410685	6.73703	7.82453	8.96905	1.66437	6.98319	3.86413	7.38574	4.72118	7.57424	8.63867	6.82234	0	9.04703	6.20619	7.80414	2.63253	3.11415	2.89225	5.90349
ENSG00000109466	kelch-like family member 2 [Source:HGNC Symbol;Acc:6353]	4	166128770	166244308	KLHL2	protein_coding	2.74254	3.50437	3.62582	0.481345	0	0	0	2.77608	4.71299	0	1.06118	0	0	0.614652	2.97904	0	0	0	0	0	2.33176	0	3.26802	0	0	6.7908	0	1.98365	7.68118	5.82115	5.73114	0	0	0	0	0.61277	0	3.93678	0	0	0	0	3.08306
ENSG00000133812	SET binding factor 2 [Source:HGNC Symbol;Acc:2135]	11	9800214	10315754	SBF2	protein_coding	8.25312	5.97548	3.82713	2.09558	4.45016	2.61183	4.72145	5.00948	3.92802	5.88437	6.86407	5.98474	3.3869	7.33661	4.42797	3.558	5.99914	5.30815	5.19391	4.19166	6.70611	4.13482	7.18743	2.49857	7.2008	7.7614	5.41953	4.27426	7.90964	5.14161	5.09735	6.27982	6.14062	4.59104	4.14488	3.79939	1.3679	6.70856	5.19043	5.2524	5.92241	2.38809	5.13093
ENSG00000140443	insulin-like growth factor 1 receptor [Source:HGNC Symbol;Acc:5465]	15	99192200	99507759	IGF1R	protein_coding	9.2183	8.24777	0.737545	4.43258	1.22131	0	7.4993	1.56069	7.72653	6.80602	1.49111	8.25667	4.14311	9.08854	4.70301	9.79067	0	0	7.49313	2.24022	3.55555	5.25338	7.36029	7.68154	8.86045	9.4836	7.72688	0.508055	7.33005	2.69562	5.35475	0	6.31242	6.87378	6.13991	4.24736	0.521576	0.506906	9.6544	7.78764	4.75422	0	5.84607
ENSG00000189180	zinc finger protein 33A [Source:HGNC Symbol;Acc:13096]	10	38299578	38354016	ZNF33A	protein_coding	7.81225	5.33557	3.54811	8.34531	8.39454	0	8.2165	6.7207	0	6.17818	0.453602	0	0.447501	0.779978	1.34858	7.06524	9.07568	1.81078	0.592192	5.52761	7.44344	0	8.15163	1.85714	5.36758	5.26628	8.3805	6.45314	7.59743	7.38444	4.74319	5.61986	7.68431	2.35317	5.51112	3.41884	0	6.09508	2.69765	1.05044	5.59889	1.52336	0
ENSG00000147789	zinc finger protein 7 [Source:HGNC Symbol;Acc:13139]	8	146052849	146072894	ZNF7	protein_coding	3.2917	4.82164	0.749047	1.38437	1.73275	1.38881	3.11022	2.98237	1.38514	3.43973	2.84385	2.78943	2.65386	5.92641	4.10581	2.02853	7.36456	4.5129	3.89983	2.7186	2.96676	2.83806	1.609	1.31061	6.01322	2.47764	3.59272	2.80181	0	3.42564	2.51	7.19264	4.55714	1.69204	2.36039	0.0888243	3.80199	3.94705	6.78992	2.52177	4.03373	2.41488	2.30799
ENSG00000102898	nuclear transport factor 2 [Source:HGNC Symbol;Acc:13722]	16	67880635	67906470	NUTF2	protein_coding	6.78178	7.7891	5.63562	7.90816	6.48462	6.78628	8.26827	0	0	5.58365	0	4.73745	5.18418	0	7.27354	2.97162	0.725676	0	6.40503	4.96638	0	7.0153	9.59021	6.72676	6.62461	0	7.17953	5.30063	7.73966	1.49882	4.63467	1.29896	6.20532	4.94554	4.86625	10.8068	0	0.881272	0	4.04141	0	7.01203	6.69723
ENSG00000102755	fms-related tyrosine kinase 1 [Source:HGNC Symbol;Acc:3763]	13	28874489	29069265	FLT1	protein_coding	3.03309	2.72736	0	1.98253	0	0.49304	1.89332	3.78532	0	2.75588	0	1.54776	0.85453	0	0	1.06948	1.50428	2.35671	0.829061	1.15045	2.64257	2.63103	2.80292	0	2.69512	1.69334	3.07181	1.40168	2.09224	3.04965	2.16947	0.809139	2.10945	0	3.06545	0.984776	0	0	0	3.09972	3.09878	0	2.1208
ENSG00000174501	ankyrin repeat domain 36C [Source:HGNC Symbol;Acc:32946]	2	96514587	96657541	ANKRD36C	protein_coding	7.95402	9.06294	6.19546	4.48421	4.45192	5.58172	7.01645	9.13373	3.48514	4.12884	3.69521	6.28831	5.4772	8.05418	0	0.782777	4.18105	0	4.92463	7.51174	5.26064	5.6327	0	3.85208	6.01828	7.60334	4.46122	1.08888	6.33377	7.1195	5.68679	10.837	7.21054	6.64012	6.69361	1.14525	0	6.28767	7.72244	5.90729	6.81537	7.45663	7.40875
ENSG00000117984	cathepsin D [Source:HGNC Symbol;Acc:2529]	11	1773982	1785222	CTSD	protein_coding	2.02331	2.87259	0.737545	4.74819	5.96006	0	4.83406	0	0	0	2.20855	3.05934	0	0	0.701468	0	0	3.46379	8.70452	0	4.65564	5.19003	0	0	0	4.69407	0.711054	2.60064	3.55688	3.90749	5.53807	6.51652	1.43615	0	4.10273	0	8.9811	6.75962	1.12272	0	7.91291	0	5.56212
ENSG00000132128	leucine rich repeat containing 41 [Source:HGNC Symbol;Acc:16917]	1	46726868	46769280	LRRC41	protein_coding	4.7942	6.93152	2.57652	1.63795	2.26553	0.69625	4.29031	0.43402	6.93645	1.82278	7.34984	1.72718	3.35947	8.06947	1.46605	3.76214	4.55054	2.87861	9.25642	5.293	4.49286	0	3.44046	4.95649	2.98649	3.87536	0.995462	0.829217	5.60717	2.32169	8.55083	0.98444	7.30373	3.25578	1.98131	3.03324	3.70944	6.24763	2.03457	4.08247	0	8.68772	2.76591
ENSG00000143401	acidic (leucine-rich) nuclear phosphoprotein 32 family, member E [Source:HGNC Symbol;Acc:16673]	1	150190717	150208504	ANP32E	protein_coding	9.77604	9.259	9.08979	8.18702	4.47931	7.11518	6.65133	8.51736	9.03793	5.53784	9.66468	8.80631	7.41545	7.67931	8.69768	9.47953	7.27861	8.24238	8.9224	0	8.37126	5.44646	8.27779	7.24201	8.65704	7.70437	7.93647	8.31871	9.14848	9.27766	8.18477	0	8.44245	8.1981	5.98473	6.84932	0.521576	9.6394	10.0951	8.04708	2.02054	7.68663	8.806
ENSG00000092148	HECT domain containing E3 ubiquitin protein ligase 1 [Source:HGNC Symbol;Acc:20157]	14	31569318	31677010	HECTD1	protein_coding	9.49876	6.11711	7.93277	3.50193	5.26243	6.97489	6.17314	5.48153	7.51012	1.58407	0	7.10791	7.19447	7.84609	4.08093	6.82806	6.67029	4.9397	4.57526	3.67047	8.11181	8.63584	6.57359	7.21962	5.25472	8.9384	8.69457	4.12624	9.16689	9.54666	3.78219	0	6.53938	7.56085	8.46403	6.1091	0.799409	5.44378	7.38402	5.58407	4.6701	4.74529	0
ENSG00000173369	complement component 1, q subcomponent, B chain [Source:HGNC Symbol;Acc:1242]	1	22979255	22988031	C1QB	protein_coding	0	0	0	0	0	0	0	0	0	0	0	0	0	0	0	0	0	0	0	0	0	0	0	0	0	0	0	0	0	0	0	0	0	0	0	0	0	0	0	0	0	0	0
ENSG00000138029	hydroxyacyl-CoA dehydrogenase/3-ketoacyl-CoA thiolase/enoyl-CoA hydratase (trifunctional protein), beta subunit [Source:HGNC Symbol;Acc:4803]	2	26466038	26513336	HADHB	protein_coding	3.77595	5.26183	0	0	5.2076	6.64529	8.41345	7.16337	8.31795	7.94117	5.00675	7.4879	5.90923	5.19336	7.18319	5.53567	3.43365	4.99711	8.82889	8.38324	9.00943	0	8.33033	7.33088	7.76251	6.81998	6.08502	7.85739	3.17293	8.21645	8.28048	0	5.26796	5.8114	8.53901	3.46658	0	7.12856	0	0.653344	2.48183	7.36374	6.08321
ENSG00000176834	V-set and immunoglobulin domain containing 10 [Source:HGNC Symbol;Acc:26078]	12	118501398	118573831	VSIG10	protein_coding	0.528331	0.655252	0	3.39301	1.88614	1.59567	7.04387	0	7.09596	0.584514	0.422748	2.83134	2.04848	0.17989	5.31549	0	0	9.87524	6.38808	0	1.85955	0	5.10418	0	5.08939	0	0	4.43859	0	2.22169	6.24467	1.83022	1.23823	1.5742	0	1.87673	0	4.15704	8.46758	0	10.9303	0	8.84802
ENSG00000131016	A kinase (PRKA) anchor protein 12 [Source:HGNC Symbol;Acc:370]	6	151561134	151679692	AKAP12	protein_coding	0.588385	0	10.0089	3.53122	2.80572	0.451049	5.86836	5.89724	0	5.62891	5.81243	3.9367	8.06445	0	0.964777	0.59255	7.14979	8.22289	8.70328	3.73747	0	10.5937	0	9.08884	0	2.17022	0.75528	0	0	2.43321	0	6.56495	5.55647	1.59571	6.6489	0	0.721528	9.20363	1.40201	0.49231	4.76318	0	0.458073
ENSG00000075420	fibronectin type III domain containing 3B [Source:HGNC Symbol;Acc:24670]	3	171757418	172119455	FNDC3B	protein_coding	9.03433	4.64429	4.38543	8.78177	5.21046	3.15773	7.21837	4.19408	8.07365	6.10343	8.00467	4.6077	5.9051	4.50084	3.43162	0.207761	5.93585	7.60344	7.72887	9.67905	5.33149	9.25795	5.65875	3.21587	7.75857	5.04243	6.26858	4.83704	8.65837	5.68389	7.8925	5.16352	4.93861	5.99221	7.27277	5.52646	4.14017	8.82133	7.98631	4.15895	11.081	6.11439	5.13649
ENSG00000052802	methylsterol monooxygenase 1 [Source:HGNC Symbol;Acc:10545]	4	166248775	166264312	MSMO1	protein_coding	5.98816	5.2119	8.84794	1.05467	2.04586	3.04613	7.19935	4.37335	5.56996	7.70778	5.13498	7.42366	5.08225	7.56506	3.90185	3.53038	4.41477	9.38508	10.1505	3.74099	6.85883	8.71982	2.99352	4.66635	6.10206	10.3381	8.94115	8.17865	9.09807	10.7177	3.40188	4.55409	8.99517	7.317	4.63388	3.5439	2.22522	0.792888	9.0704	6.8191	5.32841	8.53818	8.1053
ENSG00000144619	contactin 4 [Source:HGNC Symbol;Acc:2174]	3	2140497	3099645	CNTN4	protein_coding	1.50988	8.86202	8.73186	2.38529	4.10701	4.90986	6.40497	8.71302	1.90499	7.05557	3.2925	1.14166	2.82096	2.59605	9.19232	2.20232	5.3254	2.19225	1.6162	3.29955	7.62235	0	1.32402	8.05005	1.82356	5.75005	7.16769	7.55138	2.9725	2.03717	1.37057	0	6.14863	2.29592	3.43194	2.77671	6.66064	0	4.81198	2.66155	5.74009	9.11531	6.34601
ENSG00000142937	ribosomal protein S8 [Source:HGNC Symbol;Acc:10441]	1	45240923	45244451	RPS8	protein_coding	8.68094	8.17789	7.87386	6.61711	9.22535	7.72071	7.33116	6.67804	7.71281	8.50843	8.46529	8.16541	7.18448	7.32514	7.93783	7.91448	3.59842	6.7098	8.82566	8.51761	8.22331	8.60909	7.74115	8.24419	7.0724	8.55668	7.22324	7.30022	7.75449	7.81536	7.87298	9.6009	7.46147	8.84283	9.19895	9.36945	9.44043	8.55821	7.98299	8.30921	9.20345	8.20127	8.21511
ENSG00000170921	tetratricopeptide repeat, ankyrin repeat and coiled-coil containing 2 [Source:HGNC Symbol;Acc:30212]	17	61086917	61505060	TANC2	protein_coding	2.02331	3.35431	0	0	8.23491	6.51818	5.27181	0	0.51357	5.01573	0	5.1555	1.59475	4.03602	3.65351	2.59528	4.53761	4.50708	0	0	0	1.89963	6.72843	0	7.55579	1.7059	7.07435	3.90017	5.12809	4.1966	0	7.41295	0	5.92194	8.7744	5.83528	0.521576	1.17824	1.70528	1.44277	4.58076	0	4.5783
ENSG00000187231	SEC14 and spectrin domains 1 [Source:HGNC Symbol;Acc:18379]	2	179966419	180129517	SESTD1	protein_coding	4.10447	9.06824	1.58593	7.51712	5.88077	0	4.54179	0	9.49309	0	6.55594	8.23146	0	0.614652	1.52531	0	0	4.8791	0	3.07884	3.78397	8.73461	0	6.17211	0	5.00481	0	0	3.6772	2.01561	2.44244	0	0	0	2.37713	0	8.01343	0	7.32167	0	0	0	0
ENSG00000174437	ATPase, Ca++ transporting, cardiac muscle, slow twitch 2 [Source:HGNC Symbol;Acc:812]	12	110718561	110788898	ATP2A2	protein_coding	8.55231	0	2.93986	0.611701	0	6.16667	0.792826	6.05856	0	2.61594	7.1302	2.34355	5.97442	1.87024	5.3041	3.37375	2.11344	2.63435	4.48822	0.551476	4.5189	1.41764	3.71634	6.84486	5.66644	6.38157	2.6377	0.537724	3.00508	4.74104	5.80196	2.8509	4.00011	3.07958	4.91263	4.07371	1.19755	6.29372	1.45255	2.53609	3.01941	5.47181	7.17402
ENSG00000055211	glycoprotein integral membrane 1 [Source:HGNC Symbol;Acc:21074]	6	149887430	149912884	GINM1	protein_coding	4.26357	4.17907	8.65963	1.95135	3.95861	3.31498	6.59161	1.79599	1.68284	5.22789	2.75916	5.8703	6.37045	4.82424	3.62084	1.49892	6.82344	4.85095	6.69068	1.62783	4.21742	3.52407	4.17052	1.91626	4.49635	5.97388	5.29258	4.38713	4.46003	4.11279	4.98161	8.01534	3.58333	4.08328	2.75685	3.01635	5.85062	4.85718	4.65361	3.78024	5.40744	4.04465	5.04841
ENSG00000061918	guanylate cyclase 1, soluble, beta 3 [Source:HGNC Symbol;Acc:4687]	4	156680144	156728743	GUCY1B3	protein_coding	4.30953	5.07762	0	2.23156	0.736204	5.86437	0	2.50587	0	2.58384	9.41277	1.78463	0	5.9685	2.42844	8.69283	9.60887	2.58896	5.90386	0.551476	4.20801	7.34108	1.65915	2.9454	2.43592	8.26465	3.1117	6.38781	4.674	3.65138	4.35091	0	3.16369	0	5.231	0.61277	6.91089	6.0772	5.75463	4.57969	0	0	0
ENSG00000109472	carboxypeptidase E [Source:HGNC Symbol;Acc:2303]	4	166282346	166419472	CPE	protein_coding	10.7567	11.3917	12.3325	11.7908	11.4851	10.4813	11.862	10.6637	10.1891	11.7947	11.4639	11.3769	10.3771	11.5027	11.3929	10.5832	10.6747	11.316	4.97509	12.2941	10.8263	0	9.59826	10.5923	11.3577	9.85355	10.9223	10.8631	7.09642	10.7036	10.5552	10.6474	8.83804	11.3978	10.0184	11.7037	11.2672	11.602	11.9702	10.1021	11.0538	12.8102	10.4216
ENSG00000145833	DEAD (Asp-Glu-Ala-Asp) box polypeptide 46 [Source:HGNC Symbol;Acc:18681]	5	134094469	134190823	DDX46	protein_coding	5.3082	5.61176	4.19829	5.99637	0	3.56139	7.18134	2.90411	8.40289	4.41522	4.73969	4.30656	5.85952	8.75797	2.66046	5.27991	8.39104	7.53745	5.84559	0	4.67855	1.50074	4.3131	0	7.62848	5.85119	6.10825	1.8766	6.62961	3.01856	6.96959	2.43388	3.90035	6.22	6.3346	1.64005	1.66794	1.35009	0	1.96501	7.63281	10.8608	6.33487
ENSG00000205542	thymosin beta 4, X-linked [Source:HGNC Symbol;Acc:11881]	X	12993227	12995346	TMSB4X	protein_coding	6.96976	6.58756	8.31096	8.60283	8.6252	7.46755	6.04035	6.68691	3.89315	6.97096	9.12295	6.19252	8.80961	8.01561	1.91365	8.69622	6.61662	7.64375	10.8467	11.7413	7.10318	10.16	7.14112	6.7079	6.80617	8.61444	1.54151	2.26279	6.87005	7.87594	7.72063	8.44689	8.32154	7.18282	7.99529	11.7673	7.15884	6.99037	4.89597	7.88174	2.48183	7.23795	6.28172
ENSG00000075239	acetyl-CoA acetyltransferase 1 [Source:HGNC Symbol;Acc:93]	11	107992243	108018503	ACAT1	protein_coding	8.11552	6.73336	8.90733	7.60583	7.99622	7.6341	6.21193	0.479118	1.81142	6.59352	7.53383	3.88152	5.03791	8.86354	0.95549	4.27584	3.54206	2.45897	5.91434	4.71212	9.06007	0.628758	5.90847	5.75597	7.01275	9.30574	0.588065	6.17673	9.66532	9.1647	4.29821	0.657094	8.25483	6.44237	9.41177	5.3656	1.23273	0.485375	10.8495	7.61687	4.83371	1.67105	5.87782
ENSG00000147526	transforming, acidic coiled-coil containing protein 1 [Source:HGNC Symbol;Acc:11522]	8	38585704	38710546	TACC1	protein_coding	8.26247	6.79187	6.8718	9.78431	7.44381	5.74109	3.86143	0.475076	0	7.39954	7.42292	0.493187	9.23984	6.97532	5.72714	0	11.2514	0	8.79796	1.51719	7.00086	4.93058	7.82135	8.56711	8.36882	2.96106	9.33174	4.35177	0	3.71963	6.64741	0	1.71133	9.02036	0	6.8625	7.30582	0	5.41966	0.653344	0	8.10714	7.20633
ENSG00000142949	protein tyrosine phosphatase, receptor type, F [Source:HGNC Symbol;Acc:9670]	1	43990858	44089343	PTPRF	protein_coding	7.73548	4.61514	1.68806	5.99673	1.19637	6.20987	5.46023	5.95262	6.48099	5.35377	4.51266	3.98057	4.20684	6.62686	6.06583	1.3335	6.90029	3.00118	3.85499	6.46984	4.78864	3.46035	6.91063	6.89454	6.08983	7.17869	7.01456	6.55316	7.20279	6.54302	7.5354	6.39196	7.35495	6.25374	7.95121	3.24373	1.44377	2.66313	8.53391	6.32248	5.86113	4.88573	2.97235
ENSG00000123700	potassium inwardly-rectifying channel, subfamily J, member 2 [Source:HGNC Symbol;Acc:6263]	17	68164814	68176189	KCNJ2	protein_coding	0	0	0	5.96012	0	0	2.71657	0	0	0	0	5.23571	0	0	0	0	6.26353	0	0	5.78156	0	0	9.49991	5.72451	0	0	0	0	2.391	2.01561	0	0	4.85121	0	0	0	5.66248	0	0	0	0	0	3.16048
ENSG00000089220	phosphatidylethanolamine binding protein 1 [Source:HGNC Symbol;Acc:8630]	12	118573663	118583389	PEBP1	protein_coding	9.07104	5.55432	9.61431	7.08941	9.63774	5.19386	7.94378	7.88841	7.20195	6.22749	9.18664	7.50094	7.16937	7.30104	6.22059	9.85606	6.78351	6.93352	8.56455	9.11888	9.29689	6.21325	4.8247	9.54452	7.13201	8.61403	5.51064	9.82412	8.30849	8.60493	7.49699	8.82113	7.19551	9.00928	8.95598	7.52435	6.97722	9.05038	8.51356	7.52142	9.0538	6.24566	3.4953
ENSG00000130338	tubby like protein 4 [Source:HGNC Symbol;Acc:15530]	6	158733692	158932860	TULP4	protein_coding	5.57618	5.1873	6.80827	3.93942	2.75824	4.44843	5.90102	8.1176	8.30584	5.91992	8.33694	2.89121	8.69969	2.96136	6.02798	7.84634	9.14042	3.84576	7.9763	5.25797	9.20869	3.9529	8.25612	6.07729	4.54857	5.1939	5.3082	1.79997	3.25005	6.40931	0.783068	3.45138	8.70587	4.73582	4.09971	3.00498	1.91453	9.30485	8.46897	3.51775	4.28405	5.97778	5.14642
ENSG00000114573	ATPase, H+ transporting, lysosomal 70kDa, V1 subunit A [Source:HGNC Symbol;Acc:851]	3	113465866	113530903	ATP6V1A	protein_coding	8.46417	8.40603	3.31648	9.22123	5.25163	9.1397	4.74392	6.11542	8.51085	8.0906	9.40041	6.14836	0.651471	6.76031	0	6.61333	7.91393	9.6721	9.92831	0	3.44053	9.34904	9.60731	9.47926	8.63001	9.48615	6.59158	9.53055	9.00143	9.06686	9.19371	2.39034	1.96563	7.94241	7.25929	3.3561	5.56045	5.98566	7.48761	1.29905	8.12178	2.98644	6.39136
ENSG00000115211	eukaryotic translation initiation factor 2B, subunit 4 delta, 67kDa [Source:HGNC Symbol;Acc:3260]	2	27587219	27593353	EIF2B4	protein_coding	0	0.655252	0	0	1.91699	0	1.37424	0	0	0	0	1.78463	6.4657	8.26442	5.338	0	4.65118	3.09169	1.8228	0	2.17304	3.64049	4.45046	5.22608	7.09259	7.34656	0	0	0	4.88797	0.636405	0	0	0.291144	7.58627	5.91336	0	1.98075	1.13824	0	5.17631	0	0.750189
ENSG00000168234	tetratricopeptide repeat domain 39C [Source:HGNC Symbol;Acc:26595]	18	21572737	21715574	TTC39C	protein_coding	9.409	3.229	1.27983	1.94345	7.93725	2.7041	3.59295	2.69412	1.41089	7.13617	9.02017	2.79283	5.47981	3.6567	5.56467	7.64871	3.19501	2.62851	8.6685	2.84738	3.18937	2.55261	2.90067	7.60191	7.61171	7.11989	3.52567	7.26189	9.67772	7.06453	7.65868	3.2645	6.97665	6.73893	8.15835	0.791011	8.45446	3.55332	8.62158	1.86873	3.08845	2.26639	7.10951
ENSG00000112249	activating signal cointegrator 1 complex subunit 3 [Source:HGNC Symbol;Acc:18697]	6	100956070	101329248	ASCC3	protein_coding	4.59739	3.35025	5.18463	3.59565	3.4577	4.97562	2.53031	1.11768	0	3.16873	6.63167	0.493187	1.00735	5.17227	2.342	0	8.84716	8.85861	6.04362	7.26845	7.80447	6.49243	2.75606	5.50136	4.01112	4.56213	6.65834	0	2.62961	3.05388	7.44285	1.29896	6.31242	6.03559	7.10474	6.62017	4.56359	7.11109	0	0	0	6.85356	0
ENSG00000112977	death-associated protein [Source:HGNC Symbol;Acc:2672]	5	10679342	10761384	DAP	protein_coding	0	6.51188	5.44987	7.03235	6.60791	8.19373	4.2714	9.18799	8.30045	6.99302	5.29992	8.5083	8.546	0	6.70482	5.61203	0	7.44356	0	7.68223	1.59316	2.09673	0	4.31781	6.54895	0	0	0	5.02695	4.3983	3.30323	0	3.16369	5.54584	6.25759	6.36625	6.5171	6.83071	0	2.48091	2.48183	2.0351	1.73797
ENSG00000079277	MAP kinase interacting serine/threonine kinase 1 [Source:HGNC Symbol;Acc:7110]	1	47023090	47082515	MKNK1	protein_coding	4.49606	3.40217	1.87814	3.82797	6.09728	4.82703	5.32321	5.87479	1.78303	3.17513	5.99933	3.83983	3.8541	6.71784	2.25856	2.10058	5.64441	5.4084	4.03684	3.58573	4.86152	4.60529	3.96655	0.811311	4.43337	4.62498	3.84569	2.6334	4.011	3.9261	4.65736	5.56238	4.15181	2.8592	4.79298	7.32903	2.93636	3.66288	5.22831	4.06579	4.78174	3.10722	2.65259
ENSG00000114200	butyrylcholinesterase [Source:HGNC Symbol;Acc:983]	3	165490692	165555260	BCHE	protein_coding	4.62326	0	0	0	0	0	0	0	0	0	0	0	0	0	0	0	0	0.876649	0	0	0	0	0	0	0	0	0	0	0	0	0	0	2.31632	0	0	2.87781	0	0	0	0	0	0	0
ENSG00000074696	protein tyrosine phosphatase-like A domain containing 1 [Source:HGNC Symbol;Acc:24175]	15	65822756	65870687	PTPLAD1	protein_coding	9.2048	9.09789	7.9863	7.77158	8.3172	8.04328	8.58029	7.01239	7.39026	6.06293	9.13087	9.28838	8.78443	8.50074	7.96556	9.8777	7.22048	7.76366	6.30883	6.05848	8.5081	4.30633	9.23125	8.8263	8.128	9.84697	9.0606	8.6707	9.4773	5.54784	5.95885	8.22155	6.48042	10.4226	9.5889	9.09294	2.73591	8.71229	9.42279	2.90385	7.06604	4.57476	8.41433
ENSG00000133805	adenosine monophosphate deaminase 3 [Source:HGNC Symbol;Acc:470]	11	10329860	10529126	AMPD3	protein_coding	0.907477	0.655252	0	0	0.736204	0.451049	0	4.58553	0	2.8062	0	0	0.589865	0	0	0	0	3.46379	0	1.26108	0	1.57668	0	0	1.17652	4.33557	0	0	0	2.01561	0.636405	0	0	5.48311	0	0	0	8.13301	5.87531	0	0	3.43456	0
ENSG00000166887	vacuolar protein sorting 39 homolog (S. cerevisiae) [Source:HGNC Symbol;Acc:20593]	15	42450899	42500514	VPS39	protein_coding	3.07792	1.72228	0	3.53122	0	0	0	1.14592	0	0	5.89035	6.78429	0.409601	0	0.392954	4.60965	0	5.83358	4.30588	0	0	0	0	0	1.17652	9.37473	0.711054	0	0	2.69562	2.0796	4.36918	0	0	1.48433	5.12385	0	4.014	8.70687	0	0	0	8.94101
ENSG00000062485	citrate synthase [Source:HGNC Symbol;Acc:2422]	12	56665483	56694176	CS	protein_coding	3.74472	3.61884	7.75882	4.52912	7.91887	6.91063	6.14241	7.89066	1.05188	5.02062	1.16037	5.43656	8.54662	1.081	4.67393	5.27415	6.01586	4.14816	5.48429	3.02126	1.22942	7.35631	6.07522	2.23033	7.97438	3.86139	4.6917	6.32842	8.44657	4.69296	7.71455	3.44753	7.09143	4.40291	7.67926	7.38057	7.53304	7.38879	6.20699	7.03751	4.79213	6.31177	6.45872
ENSG00000069869	neural precursor cell expressed, developmentally down-regulated 4, E3 ubiquitin protein ligase [Source:HGNC Symbol;Acc:7727]	15	56119120	56285944	NEDD4	protein_coding	7.7025	7.87177	6.24834	5.03073	5.86008	5.6685	7.7724	7.83281	6.93504	7.9267	3.63885	6.8778	7.19193	8.52412	7.43387	6.6343	7.96653	7.52263	6.49707	7.73467	7.23214	7.02544	7.63613	5.93445	7.07584	8.77602	8.34012	5.16106	4.81364	7.58024	7.53315	8.52006	7.16136	6.58271	7.497	7.93189	7.76469	7.83679	7.70263	8.4012	8.04252	7.4562	7.53588
ENSG00000132591	Era-like 12S mitochondrial rRNA chaperone 1 [Source:HGNC Symbol;Acc:3424]	17	27181956	27188085	ERAL1	protein_coding	8.09467	7.57961	0	1.03992	8.76845	3.29408	0	0	0	4.90559	0	0	0	0	0	7.04177	1.5661	0	0	0	7.33713	5.49968	8.77142	8.08298	0	0	0	8.45561	0	2.39532	1.07649	8.25855	0	0	3.13599	2.6535	6.16973	8.16063	8.61429	0	0	0	0
ENSG00000106991	endoglin [Source:HGNC Symbol;Acc:3349]	9	130577291	130617035	ENG	protein_coding	0	0	0	0	0	0	0	0	0	0	0	0	0	0	0	0	0	0	6.33419	0	0	0	0	0	0	0	0	0	0	0	0	0	0	0	0	0	0	0	0	0	0	0	0
ENSG00000182481	karyopherin alpha 2 (RAG cohort 1, importin alpha 1) [Source:HGNC Symbol;Acc:6395]	17	66031635	66042958	KPNA2	protein_coding	5.83855	0	5.13069	6.86598	0	0	7.33116	8.59617	0	5.4413	8.8766	5.10206	1.81784	0	5.9035	6.70584	0	9.22117	0	7.72731	5.82798	5.7398	0	0	7.09864	0	6.33315	7.76878	3.6772	2.82518	4.18491	0	7.99221	0	0	0	0	0	0	2.14954	0	0	3.4953
ENSG00000159792	protein serine kinase H1 [Source:HGNC Symbol;Acc:9529]	16	67927175	67963581	PSKH1	protein_coding	0	2.91169	0	1.03992	0	0	0	0	0	0.584514	0	0.86005	0	0	0	0	1.22249	0	7.20259	1.2778	0	0	0	0	0	0	0	0	0	0.685898	2.14074	0	0.64953	0	0	0	0	0	0	0	0	2.08161	0
ENSG00000108848	LUC7-like 3 (S. cerevisiae) [Source:HGNC Symbol;Acc:24309]	17	48796905	48833574	LUC7L3	protein_coding	5.00403	8.72049	4.89217	9.34661	8.51774	6.65057	6.60489	6.15377	1.6498	7.68166	6.3914	7.55509	8.02022	8.08978	5.65726	8.20604	6.20081	6.44491	6.25011	5.57163	7.089	6.29582	8.2911	6.00541	8.63205	9.89528	5.60807	8.5459	6.456	8.50212	7.82792	8.0948	7.36931	8.88134	7.78751	6.8625	5.3133	7.40429	8.79747	7.89915	11.9469	4.7998	5.20898
ENSG00000124813	runt-related transcription factor 2 [Source:HGNC Symbol;Acc:10472]	6	45295894	45632086	RUNX2	protein_coding	0	0	0	0	0	0	0	0	0	4.80606	0	0	0	0	0	0	0	0	6.89176	0	0	0	0	0	0	0	0	0	0	0	0	0	0	0	0	0	0	0	0	0	0	0	0
ENSG00000117222	retinoblastoma binding protein 5 [Source:HGNC Symbol;Acc:9888]	1	205055270	205091143	RBBP5	protein_coding	8.22193	6.10812	3.70399	8.5729	3.15966	3.95843	8.14826	8.065	3.37112	5.14681	7.93702	3.85169	6.16155	3.53637	2.63959	3.34795	7.06422	2.85879	4.69062	0.924919	3.51285	4.30394	8.26445	0.543542	8.00783	6.5413	7.88464	7.75987	5.9123	8.36679	7.40002	3.82887	7.50931	0	4.55037	4.30913	2.03441	5.15303	8.02778	3.77179	8.45372	1.8408	6.76931
ENSG00000147862	nuclear factor I/B [Source:HGNC Symbol;Acc:7785]	9	14081842	14398982	NFIB	protein_coding	0	0	0	0	0	0	0	0	0	0	0	0	0	0	0	0	0	0	6.28809	0	0	8.38928	1.95522	0	0	0	0	0.508055	0	0	0	0	0	0	0.677432	1.04151	0	0	0	0	0	0	0
ENSG00000261098		11	107182858	107186997	RP11-819C21.1	lincRNA	1.11129	1.84278	0	1.1297	0	4.11209	5.76189	2.56696	1.16624	2.10833	0	0.766372	0	3.07667	0.679075	1.05204	1.36477	2.36844	1.81242	2.87236	2.53789	1.33258	3.7499	2.24549	1.46699	2.91852	2.20133	1.77883	1.13935	1.15283	0	3.2029	2.3392	0.859917	0.186294	0.572266	2.74156	1.54585	3.1645	1.33225	1.42307	2.28485	2.46881
ENSG00000152942	RAD17 homolog (S. pombe) [Source:HGNC Symbol;Acc:9807]	5	68665120	68710628	RAD17	protein_coding	1.67922	5.718	4.89087	0	6.91698	5.2164	3.02953	0.487169	0	2.6993	7.50288	7.14987	1.59475	4.25371	8.05115	0	1.35005	1.76538	0.592192	4.54581	0.815388	0	0	5.28118	0	0	5.007	0	6.26579	7.87344	7.63683	1.29896	2.61304	0	6.50611	6.43906	0	0	3.28181	5.67842	6.46189	0	0.602663
ENSG00000189403	high mobility group box 1 [Source:HGNC Symbol;Acc:4983]	13	31032884	31191734	HMGB1	protein_coding	9.60095	7.64517	7.26165	7.58226	8.75176	9.97316	7.57769	9.00681	7.55161	6.61183	4.73714	8.92094	8.25516	8.1881	6.26238	8.71821	8.44912	8.46616	8.45322	8.26991	9.01407	9.57835	8.59114	9.44091	9.41913	9.53556	8.42951	6.50804	8.91154	9.04806	8.73969	8.3548	7.56227	8.88134	9.08892	8.59221	6.53963	7.39998	10.579	8.99021	5.91183	8.67385	9.87445
ENSG00000245532	nuclear paraspeckle assembly transcript 1 (non-protein coding) [Source:HGNC Symbol;Acc:30815]	11	65190245	65213011	NEAT1	lincRNA	3.01445	8.78638	9.90036	11.2869	11.3694	9.54489	8.69134	8.87684	7.76646	10.4952	1.03846	8.52779	10.0906	13.053	8.38361	1.65559	7.99638	9.85374	11.8289	10.3466	8.53303	9.94483	10.1378	8.6126	11.0042	12.4278	3.03529	7.60348	1.86825	11.872	2.41421	9.90954	11.6063	0.601019	8.58183	3.83994	9.55912	8.89108	4.23258	9.87423	9.31537	10.7763	9.52015
ENSG00000091831	estrogen receptor 1 [Source:HGNC Symbol;Acc:3467]	6	151977826	152450754	ESR1	protein_coding	0	0	0	0	0	0	0	0	0	0	0.44595	0	0	0	0	8.852	0	0	0	0	0	0	0	0	0	0	0	0	0	0	0	8.47831	0	0	7.07298	0	0	0	9.60617	0	4.02563	0	0
ENSG00000251562	metastasis associated lung adenocarcinoma transcript 1 (non-protein coding) [Source:HGNC Symbol;Acc:29665]	11	65265233	65273940	MALAT1	lincRNA	13.9448	14.7653	13.2343	14.7762	14.1058	14.2391	14.6757	14.4683	14.0134	15.0363	13.9144	14.4144	14.9515	15.0689	14.2981	12.7877	15.197	14.3046	12.4331	14.4695	14.2754	13.0435	12.9903	14.4624	14.8127	14.9126	13.9546	12.432	14.78	13.8854	15.4058	14.3668	14.4018	14.4609	13.7358	13.985	14.7167	14.6012	14.7939	14.7802	14.8635	15.343	14.4452
ENSG00000155893	acid phosphatase-like 2 [Source:HGNC Symbol;Acc:26303]	3	140947568	141013748	ACPL2	protein_coding	0	1.10419	2.52392	0	0	0.458775	0	0.831864	0	0	0	2.74539	0	0	0	0	0	0	0	0	0	0	1.03589	0	0	0	0	0	0	1.15283	1.68608	0	3.756	0	0	0	0	0.454681	7.06679	0.653344	0	0	0
ENSG00000166840	glycine-N-acyltransferase-like 1 [Source:HGNC Symbol;Acc:30519]	11	58672871	58811000	GLYATL1	protein_coding	0	0	0	0	0	0	0	0	0	0	0	0	0	0	0	0	0	0	0	0	0	0	0	0	0	0	0	0	0	0	0	1.29896	0	0	0	0	0	0	0	0	0	0	0
ENSG00000159658	EF-hand calcium binding domain 14 [Source:HGNC Symbol;Acc:29051]	1	47124366	47184824	EFCAB14	protein_coding	8.35219	6.25381	4.14432	7.48346	5.46846	0.794161	3.69403	7.96696	2.27745	5.69912	6.32776	2.65493	4.47343	5.79993	0	3.21491	0	0.876649	0.592192	1.26108	7.73332	2.69205	5.09145	0	8.26921	8.03506	8.83231	6.47938	2.9267	4.97431	4.04655	4.09302	7.20666	6.65648	5.59526	2.6535	3.21333	6.78187	3.67533	0.653344	6.38455	5.43784	6.06319
ENSG00000092820	ezrin [Source:HGNC Symbol;Acc:12691]	6	159186773	159240444	EZR	protein_coding	9.30475	7.96205	7.30217	8.49218	10.2645	7.59215	8.41345	6.75819	7.78084	6.38237	7.77274	8.14686	8.52043	7.64147	8.50599	8.48807	10.3083	8.65822	1.01083	6.51291	9.41385	5.88021	9.00613	8.15997	9.39482	7.66475	8.90315	7.61489	7.99436	7.0824	8.94363	5.25713	7.11506	8.49093	6.13991	9.12627	9.25788	7.81781	3.91942	8.88743	8.17189	6.01166	9.37778
ENSG00000182022	carbohydrate (N-acetylgalactosamine 4-sulfate 6-O) sulfotransferase 15 [Source:HGNC Symbol;Acc:18137]	10	125767184	125853206	CHST15	protein_coding	0	0	0	0	0	0	0	0	0	0	0	0	0	0	0	0	0	0	8.57803	0	0	7.99434	0	0	0	0	0	0	0	0	0	0	0	0	0	0	0	0	0	0	0	0	0
ENSG00000001167	nuclear transcription factor Y, alpha [Source:HGNC Symbol;Acc:7804]	6	41040684	41067715	NFYA	protein_coding	0	0	0	0	0	3.58629	1.76063	0	0	5.28409	0	0	0	0	0	0	0	1.41803	1.33492	0	0	3.20061	0	0	7.74989	0	0	3.9404	0	2.69562	0	7.00893	0.64953	0	7.61301	0.61277	0	5.09841	0	0	0	0	0
ENSG00000132965	arachidonate 5-lipoxygenase-activating protein [Source:HGNC Symbol;Acc:436]	13	31309645	31338556	ALOX5AP	protein_coding	0	0	0	0	0	0	0	0	4.59032	0	0	0	0	0	0	0	0	0	0	0	0	0	0	0	0	0	0	0	0	0	0	0	0	0	0	0	0	0	0	0	0	0	0
ENSG00000124766	SRY (sex determining region Y)-box 4 [Source:HGNC Symbol;Acc:11200]	6	21593972	21598847	SOX4	protein_coding	8.61642	0	0	0	0	0	0	0	0	0	9.84254	3.25679	0	1.04431	0	0	5.68182	2.58896	10.8309	0	0	11.1212	7.84411	6.28963	0	0	0	0	9.29	6.84332	0	4.37274	0	6.76593	9.30527	3.59849	0	0	7.60081	0	2.02054	0	0
ENSG00000144959	neutral cholesterol ester hydrolase 1 [Source:HGNC Symbol;Acc:29260]	3	172348039	172429008	NCEH1	protein_coding	5.64509	0	0	7.63679	1.58369	0	3.16375	0	0	0	0	0	0	0	1.93271	5.53567	0	0	0	0	0	0	5.97433	1.96876	7.73717	1.09164	0	0	0	0	0	1.67391	0	0	0	0	0	8.36361	2.18037	0	0	0	0
ENSG00000115966	activating transcription factor 2 [Source:HGNC Symbol;Acc:784]	2	175936978	176033110	ATF2	protein_coding	8.46375	1.72228	6.76077	5.14257	2.32041	4.59235	2.31637	8.0877	7.02853	6.4333	6.47013	5.42552	7.49436	6.36233	0	0	8.75413	1.81078	8.44568	0	0	6.27561	0	0.36897	7.25614	8.64697	4.92134	4.54677	0	4.12391	5.7007	0	4.96064	0	6.64217	6.6735	0	0	8.24899	6.75643	3.88344	2.8474	3.00126
ENSG00000152990	G protein-coupled receptor 125 [Source:HGNC Symbol;Acc:13839]	4	22346694	22517677	GPR125	protein_coding	0.211183	1.65276	2.42161	0.824538	1.38839	1.75633	3.2771	3.35159	0.908072	2.23467	0	2.80213	3.08503	3.0277	1.17542	1.47295	6.79034	4.39459	2.43169	2.11711	8.68611	2.02109	3.70524	1.79428	3.58224	2.59438	3.37261	0	1.79563	3.11192	2.8698	3.38839	1.14856	3.33819	1.18301	3.72455	0	0	3.77982	0	4.35582	1.56676	4.16647
ENSG00000144369	family with sequence similarity 171, member B [Source:HGNC Symbol;Acc:29412]	2	187558698	187630685	FAM171B	protein_coding	8.83414	8.1548	7.69957	7.24315	5.51121	6.62933	7.09954	8.22566	6.65286	6.91753	7.93527	5.46599	6.96291	7.71622	8.5196	9.84649	6.68613	6.68657	7.97569	3.76243	1.59316	0	9.06485	0	6.83034	9.64619	0	6.16828	8.77563	7.53479	6.76974	7.3817	8.30135	7.86146	9.31208	4.50442	2.99428	2.49339	8.02599	0	4.02563	0	3.76687
ENSG00000196693	zinc finger protein 33B [Source:HGNC Symbol;Acc:13097]	10	43084555	43133992	ZNF33B	protein_coding	2.37831	3.03014	8.19439	0	6.9695	0	3.52173	4.45566	6.44207	4.79312	9.47031	3.56321	2.63639	2.68096	5.99061	1.46544	2.97159	6.15464	2.58355	1.29979	2.69744	2.10041	4.18714	0.466522	3.01264	5.78673	2.42487	1.38078	3.25719	3.47228	5.85764	2.54094	2.86916	5.63668	7.13088	3.98006	3.368	8.23652	7.05732	0	4.24852	1.86963	2.0428
ENSG00000177156	transaldolase 1 [Source:HGNC Symbol;Acc:11559]	11	747329	765024	TALDO1	protein_coding	7.78828	0	5.81734	6.72237	8.59407	3.05953	4.89053	4.4114	0.344118	6.46538	4.08213	7.63121	0	0	7.6278	6.71161	5.91849	0.876649	2.91885	7.82237	7.34908	0	6.98765	0.906346	7.75983	1.96191	8.24672	3.83339	0.557475	2.72514	2.70906	2.23564	1.1851	3.74661	0	8.93975	8.00611	9.19315	7.84546	1.43973	3.38505	1.0235	7.78998
ENSG00000165733	BMS1 ribosome biogenesis factor [Source:HGNC Symbol;Acc:23505]	10	43278249	43330385	BMS1	protein_coding	3.95485	2.66987	0	1.88483	2.29714	8.11641	6.94758	1.13571	0	2.47268	1.93419	1.1759	2.01822	6.86546	4.45788	1.84253	7.50756	0	1.7808	4.91365	3.12412	0.649001	5.41076	0	5.47532	5.93092	1.63324	0.340212	1.59625	5.94634	2.46435	5.3112	0	5.4479	0	10.5367	0	0	5.969	6.30649	0	7.33172	0.593759
ENSG00000120694	heat shock 105kDa/110kDa protein 1 [Source:HGNC Symbol;Acc:16969]	13	31710762	31736525	HSPH1	protein_coding	6.55871	3.26654	0	0.611701	5.59308	0	1.76063	6.6163	6.62188	3.16873	0	5.1555	0	2.53124	8.16568	0	5.7181	11.2166	4.92776	4.62905	7.52264	8.89384	6.56265	0.906346	0	10.4906	2.26963	5.39049	7.78973	10.3934	6.00467	0	7.27181	3.84966	3.94326	5.22937	0	0	9.9575	8.20104	2.02054	6.95912	3.90823
ENSG00000111481	coatomer protein complex, subunit zeta 1 [Source:HGNC Symbol;Acc:2243]	12	54694986	54745633	COPZ1	protein_coding	6.01107	6.09302	8.96627	9.23599	8.01862	7.65655	7.25801	6.86824	7.93751	8.13565	7.54826	8.10903	7.98614	0	7.99206	6.61852	3.24759	0	7.08212	7.25091	8.17042	0	4.71041	8.46848	7.52157	4.21202	8.22763	8.5524	7.9021	7.6573	7.85581	5.85699	6.75365	6.32209	7.66506	7.6513	7.81008	10.6916	0	7.56571	5.40171	6.78089	7.28189
ENSG00000089063	transmembrane protein 230 [Source:HGNC Symbol;Acc:15876]	20	5080486	5093749	TMEM230	protein_coding	8.60024	7.50851	8.72596	1.03992	5.25867	7.22897	5.16989	4.99138	7.52359	5.91754	7.04571	7.44805	0	10.176	8.40434	9.25383	6.80896	0	8.45615	4.87778	6.80658	0	5.46487	5.0469	8.42545	1.09164	7.23549	10.2518	7.7555	7.76619	6.18039	1.97123	8.2101	8.87525	9.18267	5.10178	0.521576	7.843	5.03537	0	2.02054	9.28136	8.63685
ENSG00000115234	sorting nexin 17 [Source:HGNC Symbol;Acc:14979]	2	27593389	27599995	SNX17	protein_coding	1.46023	4.18957	7.80234	0	3.62274	0	8.08584	0	3.37945	5.20814	7.12647	0.493187	4.59901	10.0602	0	6.17639	0	0	8.20638	5.45397	0	5.31406	0	0	2.59485	0	6.64003	0	6.48668	0	6.98078	0	0	0	0	0	0	8.86352	4.98262	0	0	0	0
ENSG00000065154	ornithine aminotransferase [Source:HGNC Symbol;Acc:8091]	10	126085872	126107545	OAT	protein_coding	5.67012	8.3428	6.43328	5.36221	0	8.4499	7.06564	8.20101	5.75542	8.77509	8.99818	6.1682	7.51043	9.22925	8.48975	5.60137	7.178	8.93207	9.41815	9.84267	6.66081	9.79544	4.78383	3.4474	8.73805	8.17855	5.36215	0	0	8.53089	8.43408	3.3914	8.95176	6.69158	0.677432	3.46658	0.903844	10.7667	8.47349	7.44759	6.38455	2.62391	0
ENSG00000070413	DiGeorge syndrome critical region gene 2 [Source:HGNC Symbol;Acc:2845]	22	19023795	19109967	DGCR2	protein_coding	0	2.32891	0	0	0	0	0	0	0	6.21784	0	6.57204	0	7.63759	0	0	3.43365	2.94277	0	0.949474	0	0	0	0	0	1.09164	0	0	0	2.01561	0	0	0	3.07958	2.53464	0.61277	0	10.5513	1.12272	0	0	3.43456	0
ENSG00000007306	carcinoembryonic antigen-related cell adhesion molecule 7 [Source:HGNC Symbol;Acc:1819]	19	42177235	42210895	CEACAM7	protein_coding	0	0	0	0	0	0	0	0	0	0	0	0	0	0	0	0	0	0	0	0	0	0	0	0	0	0	0	0	0	0	0	0	0	0	0	0	0	0	0	0	0	0	0
ENSG00000005893	lysosomal-associated membrane protein 2 [Source:HGNC Symbol;Acc:6501]	X	119561682	119603220	LAMP2	protein_coding	8.83252	9.88154	8.27952	9.23406	4.27121	8.27366	5.9146	7.7023	4.55007	8.89848	9.28231	6.55219	3.07382	5.23425	8.27758	6.49985	8.34995	7.31583	9.17148	5.68015	9.34368	9.64127	8.22915	9.77814	7.92855	10.0287	8.78618	6.92583	9.32736	9.2482	8.64285	6.49752	9.2629	4.84935	8.7357	1.75308	6.15807	4.94577	9.86051	2.65632	2.13543	6.4136	8.65529
ENSG00000166881	transmembrane protein 194A [Source:HGNC Symbol;Acc:29001]	12	57449426	57481846	TMEM194A	protein_coding	1.21017	0	0	0	0	0	0	0	0	0	0	5.12212	0	0	0	0	0	0	0	0	0	5.25338	0	0	0	0	0	0	0	2.21792	0	0	0	0	1.48433	0	0	10.5778	0	0	0	0	0
ENSG00000105388	carcinoembryonic antigen-related cell adhesion molecule 5 [Source:HGNC Symbol;Acc:1817]	19	42212504	42233718	CEACAM5	protein_coding	0.528331	0.655252	0	0	0	0	2.02897	0.793425	1.43846	0	0.461214	1.59134	0.609102	0	0.962461	0	1.72573	1.4842	0	0	1.21696	2.04229	0	0	0	0.959411	0	0	0	0	1.90265	1.5854	0	0	0.698896	0.984776	0	1.9869	0.667922	3.07542	0.261505	0	0.571257
ENSG00000107798	lipase A, lysosomal acid, cholesterol esterase [Source:HGNC Symbol;Acc:6617]	10	90973326	91174314	LIPA	protein_coding	5.95106	7.82612	4.03111	0	0	0	5.65426	0	4.73632	6.65688	2.51317	5.64114	7.86634	0	0.95549	1.29589	7.10453	0.876649	0	2.99707	6.56161	0	2.33023	0	0	6.00775	0	0	0	1.14887	2.82761	6.09135	5.98987	0	1.48433	6.83782	0	0	0	8.27494	4.38355	7.53821	8.05961
ENSG00000254986	dipeptidyl-peptidase 3 [Source:HGNC Symbol;Acc:3008]	11	66247484	66277130	DPP3	protein_coding	8.51473	4.61886	0	0	0	0	0	4.38471	0	3.08628	4.97387	0	0	0	0	0	0	0	4.06468	5.4843	0	0	7.23499	5.31326	2.05339	0	0	0	0	2.01561	3.94633	0	2.14141	0	0	0	6.12541	0	5.58804	0	0	5.9038	0
ENSG00000128590	DnaJ (Hsp40) homolog, subfamily B, member 9 [Source:HGNC Symbol;Acc:6968]	7	108210012	108215294	DNAJB9	protein_coding	7.46784	7.94195	0	6.06625	6.66582	0	6.03317	0.475076	0	7.21783	8.11942	5.22002	0	8.73454	0	0	0	7.17802	6.87314	0	7.69638	7.54473	0	0	0	7.05289	9.41622	0	9.26477	10.3232	6.07754	5.76311	7.66443	6.83663	8.90999	5.22937	0	3.57845	4.74988	0	8.90071	8.32492	0
ENSG00000156650	K(lysine) acetyltransferase 6B [Source:HGNC Symbol;Acc:17582]	10	76585340	76792380	KAT6B	protein_coding	2.91995	3.35025	1.93716	0	7.11712	0	6.86298	1.30011	6.55128	5.18852	7.8449	3.83531	2.74582	4.21173	3.2878	3.09839	0.126331	7.49501	6.1083	1.51719	3.04523	0.688656	2.725	3.66189	2.1711	4.8704	2.68277	0.482129	2.7589	8.77585	4.84495	3.71395	7.16095	5.65016	7.87982	6.77458	2.2702	0	4.90309	6.34339	7.84489	8.4388	2.82227
ENSG00000132589	flotillin 2 [Source:HGNC Symbol;Acc:3758]	17	27206353	27224697	FLOT2	protein_coding	0	1.44608	0	0	6.73958	3.3982	2.53031	4.51346	0	0	9.57777	0	1.00735	0	3.65351	0	7.86857	0	0	9.17341	6.17534	0	0	8.90985	3.8937	0	0	0	0.557475	2.01561	6.51374	0	0	1.57901	6.82104	7.00602	4.50945	0	0	0	0	0.600669	3.23395
ENSG00000126088	uroporphyrinogen decarboxylase [Source:HGNC Symbol;Acc:12591]	1	45477819	45481247	UROD	protein_coding	7.686	3.57567	8.5132	6.64782	0	8.17919	6.151	0	0	1.32112	0	7.00175	0	0	0	9.39483	1.20624	7.10979	0	6.81686	6.96249	7.47113	5.31649	8.73439	4.26863	0	4.18579	0	8.46881	7.71695	3.38207	7.25638	7.79576	0	9.26086	6.98809	0	0	7.67335	0	4.48552	0	0
ENSG00000198791	CCR4-NOT transcription complex, subunit 7 [Source:HGNC Symbol;Acc:14101]	8	17086737	17104387	CNOT7	protein_coding	6.27037	9.24406	6.12382	6.60933	9.74836	6.21023	6.151	6.25301	6.17803	7.44161	6.8422	7.26138	0	6.7375	3.14192	8.22653	3.51839	0.876649	7.65429	4.15064	7.61954	4.67697	7.3348	2.57394	6.83034	0.646696	5.97244	4.71852	6.54614	9.33317	8.49964	6.29292	6.8205	8.96262	8.8419	6.93286	0	1.17824	9.63955	6.14491	4.98065	5.4885	0.552999
ENSG00000100823	APEX nuclease (multifunctional DNA repair enzyme) 1 [Source:HGNC Symbol;Acc:587]	14	20923350	20925927	APEX1	protein_coding	5.00403	4.61886	7.5939	8.44705	0	3.44757	7.04839	2.29276	1.43846	0.584514	7.22057	5.91892	0	4.40498	5.70998	0	0	3.66738	8.46653	0	3.78397	7.51056	0	6.1486	3.55	5.44023	5.00957	0	8.80788	8.35432	7.65218	0.790987	0	6.44237	3.88593	0.61277	0	8.03353	7.49648	7.1075	0	0.600669	0
ENSG00000073910	furry homolog (Drosophila) [Source:HGNC Symbol;Acc:20367]	13	32605437	32870794	FRY	protein_coding	0	0	4.79147	0	5.94455	4.97562	4.14725	0	4.42786	5.30247	3.10542	0	3.71397	0.614652	2.51	0	4.86335	5.3326	5.63585	0	7.52791	0	2.41051	0	0.705012	4.81495	0	4.7863	2.9267	0	6.90938	0	7.17862	0	3.9984	0.61277	7.05015	0	0	2.32472	4.90905	0	0
ENSG00000090060	poly(A) polymerase alpha [Source:HGNC Symbol;Acc:14981]	14	96967770	97033448	PAPOLA	protein_coding	9.90633	8.88996	8.55311	7.04608	8.48393	8.72997	8.06861	2.68627	8.36371	9.89316	6.0435	8.80238	5.80203	2.40959	9.96628	5.03135	7.46762	5.56183	8.04384	9.21695	9.19624	7.76635	10.0345	9.78807	8.20805	8.62781	7.94477	9.17523	6.91366	5.96685	7.56708	2.30123	8.37767	5.90158	8.28563	10.216	8.18797	8.97244	8.81174	9.54917	7.32122	9.44754	8.54529
ENSG00000064989	calcitonin receptor-like [Source:HGNC Symbol;Acc:16709]	2	188207856	188313187	CALCRL	protein_coding	0	0	1.49321	0	0.889246	0.778811	2.57533	2.9623	0	0.921563	0	0.501517	1.88449	1.37198	0.737132	0.585641	2.15638	0	0.552803	1.7705	1.7193	0.792399	2.72028	0.365711	0	0	0.64794	0	0.933847	1.14491	2.2046	3.30343	0.942026	1.66064	1.34152	0.855723	0.635163	2.56185	1.12272	0.76454	0.58925	1.01983	0.372165
ENSG00000150995	inositol 1,4,5-trisphosphate receptor, type 1 [Source:HGNC Symbol;Acc:6180]	3	4535032	4889524	ITPR1	protein_coding	0	1.10419	1.22322	1.36971	5.97541	0	7.85727	2.77608	0	0.999327	0	1.15228	7.79923	0	6.09407	0	3.34362	0.876649	0	0	6.34005	5.56772	0	7.39972	1.53131	0	1.18523	0	1.52945	1.78023	6.35667	0	0	1.31657	0	3.07188	4.58992	1.17824	0	7.02106	3.72568	0	0
ENSG00000115524	splicing factor 3b, subunit 1, 155kDa [Source:HGNC Symbol;Acc:10768]	2	198254508	198299815	SF3B1	protein_coding	8.56397	8.61444	8.98349	8.18702	8.80653	8.15896	7.64987	10.5817	8.19283	8.52809	5.43891	9.13807	6.67985	9.22414	6.17756	5.46683	9.52688	7.95703	7.58371	6.45284	9.00943	9.88066	6.28503	9.49177	7.77916	10.0526	9.28389	8.06721	8.21768	9.72535	8.42712	6.04424	6.31242	1.57901	9.41572	4.03092	6.87387	9.82561	7.6981	8.52648	7.46596	9.34231	7.24238
ENSG00000170915	progestin and adipoQ receptor family member VIII [Source:HGNC Symbol;Acc:15708]	6	52226219	52272575	PAQR8	protein_coding	4.73802	0	0	0	3.0767	0.797211	0	0	0	2.50097	0	0	0.589865	0.654146	0.0876202	2.97162	0	0	2.83205	0	0	1.09502	1.27339	0	3.5562	0.646696	7.1279	0.883044	0	0.685898	0	2.87981	0	0	0	0	0	0.881272	6.54595	0.699874	0	0	0
ENSG00000177311	zinc finger and BTB domain containing 38 [Source:HGNC Symbol;Acc:26636]	3	141043055	141168634	ZBTB38	protein_coding	8.31328	4.33268	7.07533	7.48346	6.11013	4.27439	1.175	0.479118	0	3.90804	8.76075	2.22279	4.55876	0	2.07135	1.48599	8.87517	7.44363	9.37744	8.07739	1.25403	7.18721	4.85478	1.96445	6.95141	2.60649	0	0	8.05093	5.94591	3.59562	7.07582	6.71513	0.581988	8.24989	7.17414	9.36894	3.62842	4.98664	0	5.51841	9.86766	4.62138
ENSG00000219626	family with sequence similarity 228, member B [Source:HGNC Symbol;Acc:24736]	2	24299396	24392509	FAM228B	protein_coding	7.31475	8.21716	6.97642	4.96639	6.47655	5.96909	7.4102	7.62235	6.07373	7.89717	5.42706	7.57376	6.83515	7.09204	6.6257	7.19234	6.87094	8.30261	6.64955	4.61788	8.56263	6.61953	7.64191	5.72951	7.48818	7.87145	7.62246	5.0639	7.06962	6.46782	6.83699	8.28298	7.30046	7.68553	7.87758	8.15927	1.66596	7.75199	6.74952	8.04286	7.24272	6.37544	7.03885
ENSG00000141232	transducer of ERBB2, 1 [Source:HGNC Symbol;Acc:11979]	17	48939584	48945339	TOB1	protein_coding	9.73438	0	7.11344	4.85734	3.4577	8.16266	9.11253	8.12848	5.69716	6.32959	7.64802	8.67437	8.71853	0	7.51491	8.90392	8.59251	8.51059	9.44151	8.43656	6.94685	5.29412	8.78089	6.82274	1.17652	8.7529	7.40773	7.45054	10.2675	11.6358	8.212	0	8.44716	8.84126	11.3063	9.94054	0	1.17824	11.4506	0	7.0158	2.20631	4.52075
ENSG00000099204	actin binding LIM protein 1 [Source:HGNC Symbol;Acc:78]	10	116190872	116444762	ABLIM1	protein_coding	5.70686	8.57148	7.89828	4.11851	9.98441	1.07115	6.79272	8.84188	7.67916	8.38883	0	6.65607	6.5614	6.04013	8.12581	8.80514	4.36529	3.56917	0	6.11771	7.75144	0	4.49717	0.36897	8.19048	5.17256	7.7822	7.01017	6.44042	6.49952	4.69768	0	8.48657	5.48311	8.28832	3.53404	1.20575	0	1.12272	7.84267	6.3031	0.600669	6.28682
ENSG00000165195	phosphatidylinositol glycan anchor biosynthesis, class A [Source:HGNC Symbol;Acc:8957]	X	15337573	15353676	PIGA	protein_coding	0	0	0	0	0	0	0	0	0	4.61342	0	3.68021	0	3.53901	0	0	0	0	0	0	0	0	0	0	0	1.09164	1.827	0	0	0	5.07522	4.02993	0.64953	0	2.80589	0	2.01744	0	0	0	0	0	0
ENSG00000096093	EF-hand domain (C-terminal) containing 1 [Source:HGNC Symbol;Acc:16406]	6	52285106	52387892	EFHC1	protein_coding	6.42541	5.50129	3.46075	4.53472	4.85614	0.734943	5.28837	2.04262	8.40431	7.29787	2.51409	6.3231	2.33367	4.25251	2.342	5.64356	1.20624	4.65804	0.597041	6.40608	3.1451	4.91211	7.09775	4.11656	4.6411	9.16764	8.15217	3.10406	8.57448	3.65138	1.07649	5.95891	8.00184	1.80097	1.13657	3.15993	5.72321	3.29757	3.80253	0.653344	10.9562	0.600669	7.50975
ENSG00000112096	superoxide dismutase 2, mitochondrial [Source:HGNC Symbol;Acc:11180]	6	160090089	160183561	SOD2	protein_coding	6.11115	1.66327	7.3015	3.06916	0	0.454918	3.62681	5.7768	0	5.81272	1.36289	0.493187	0	6.58621	5.89472	0	5.47007	0.876649	11.3222	2.45144	7.86039	5.35488	0	1.45869	4.27004	1.96818	4.30402	0	0	6.7485	5.80496	1.34116	1.44521	3.79751	5.87499	2.77113	0	2.25972	7.86104	0	5.84702	0	6.45004
ENSG00000106261	zinc finger with KRAB and SCAN domains 1 [Source:HGNC Symbol;Acc:13101]	7	99613204	99639312	ZKSCAN1	protein_coding	8.7366	8.99832	8.55675	5.16822	9.01778	6.85495	9.02252	8.5583	6.93921	9.30805	9.19559	8.23523	8.47937	9.18646	7.77971	7.82649	7.5941	9.53151	6.41853	6.59448	8.903	6.85395	6.98117	8.78939	7.42795	9.85971	9.34584	9.44269	8.11138	9.67361	6.66147	8.22091	6.10293	8.69476	9.27438	6.87667	8.25589	7.64778	9.75856	9.83668	6.63829	7.80955	6.61099
ENSG00000186409	coiled-coil domain containing 30 [Source:HGNC Symbol;Acc:26103]	1	42929001	43120335	CCDC30	protein_coding	6.99677	6.24192	2.19016	3.33077	4.2537	3.30751	4.55308	4.57707	3.42208	4.96909	4.65386	4.82739	4.17412	4.73411	4.12974	3.40499	4.62352	5.16755	4.82585	4.08131	4.29557	3.99503	3.43183	1.12645	4.50038	5.03673	4.12018	2.30283	4.39973	3.87913	5.08326	4.99404	3.68187	3.39926	6.43474	3.82116	3.24217	8.4259	5.61689	5.92099	4.56314	3.10549	3.9843
ENSG00000184009	actin, gamma 1 [Source:HGNC Symbol;Acc:144]	17	79476997	79490873	ACTG1	protein_coding	10.3994	8.17216	9.60198	7.97932	7.84981	10.922	11.3498	10.5561	10.4826	8.41017	10.086	10.265	12.3534	7.55442	2.342	3.21491	13.2824	11.6599	10.9334	11.734	10.7373	10.658	6.99572	11.4965	12.0558	10.3835	10.1795	9.81153	11.0355	11.7534	10.2404	9.00462	10.2794	10.3601	10.18	11.2873	7.24499	11.0027	10.2847	8.72896	9.55379	8.35253	10.0893
ENSG00000085224	alpha thalassemia/mental retardation syndrome X-linked [Source:HGNC Symbol;Acc:886]	X	76760356	77041702	ATRX	protein_coding	9.23831	8.18931	7.00519	6.21724	3.05722	6.41025	8.2608	7.71717	6.36177	8.82362	8.75741	6.50241	7.41971	9.92641	7.68478	8.80165	6.92991	7.95703	8.46031	8.21033	7.71034	7.70815	7.01189	6.78511	7.99052	10.4786	9.5011	9.61092	8.51605	6.08656	9.05873	8.16988	8.56665	9.3737	9.7678	6.24062	8.77995	8.59954	8.89527	9.45675	6.58162	6.1649	8.22415
ENSG00000196628	transcription factor 4 [Source:HGNC Symbol;Acc:11634]	18	52889562	53332018	TCF4	protein_coding	8.11632	5.81326	7.47051	0	0.736204	0.439382	0	0	0	6.3206	6.45829	1.68392	0	5.20546	1.80926	0	1.33518	0.876649	5.24983	6.59858	0	8.29207	5.0321	0	5.36912	5.99501	0	6.76346	5.00592	2.01561	0	1.29896	3.13409	7.08916	8.02367	4.72253	2.42095	0	6.74921	0	7.44079	9.63152	0
ENSG00000101290	CDP-diacylglycerol synthase (phosphatidate cytidylyltransferase) 2 [Source:HGNC Symbol;Acc:1801]	20	5107432	5178533	CDS2	protein_coding	8.88496	6.35749	8.62223	9.42297	8.50529	6.20887	7.66693	8.78944	6.94127	9.30804	8.22869	8.36625	6.21629	8.98879	7.21104	9.55774	5.09704	8.2111	5.38913	4.9858	7.48983	7.98221	9.50405	7.46152	8.84088	8.68646	5.30006	8.7563	7.54822	7.61689	5.98371	6.11648	8.43427	8.47671	8.26191	3.5634	7.31741	2.87086	6.09911	7.82295	5.60343	7.98474	6.31274
ENSG00000240303	acyl-CoA dehydrogenase family, member 11 [Source:HGNC Symbol;Acc:30211]	3	132276982	132379567	ACAD11	protein_coding	0.523944	0	0	0	5.72605	0	0	0	0	1.80639	0	0	0.589865	3.48801	0	0.782777	0	0	0	0.551476	0	0	0.781936	8.34332	0	6.65974	0	0	1.52945	1.14887	1.07649	0	1.43615	0	0	3.07188	0	0	0	0.653344	0	7.27993	0.552999
ENSG00000146457	Wilms tumor 1 associated protein [Source:HGNC Symbol;Acc:16846]	6	160146617	160177351	WTAP	protein_coding	7.54428	7.37997	9.13844	9.20534	7.75076	7.44493	7.3096	5.84299	2.89019	6.99302	9.05725	4.86399	4.62877	6.33411	7.42083	8.44846	7.88062	8.99725	8.18727	7.36532	6.866	7.95042	7.94444	7.43902	6.661	8.09597	6.73798	5.01068	6.43256	7.67889	6.92262	5.64133	7.30332	4.65533	6.02512	1.3716	1.45528	7.9151	5.00923	6.1448	9.80126	5.29333	7.80319
ENSG00000079689	secretagogin, EF-hand calcium binding protein [Source:HGNC Symbol;Acc:16941]	6	25652464	25702011	SCGN	protein_coding	11.3536	9.50142	10.1718	10.9363	10.8073	10.1589	8.49849	10.3075	7.73525	10.2754	9.87851	10.1637	10.2277	10.915	11.4364	11.1696	8.87153	10.8524	0	9.43739	11.1171	0	8.14842	10.8893	10.0614	10.9442	6.32171	10.0408	11.6789	10.8101	10.4029	7.91441	8.27245	11.2307	11.7166	8.25402	6.87921	10.6623	10.8664	10.912	10.5761	10.2413	10.0059
ENSG00000229807	X inactive specific transcript (non-protein coding) [Source:HGNC Symbol;Acc:12810]	X	73040486	73072588	XIST	lincRNA	0	0	0	0	0	0	0	0	0	0	0	0.493187	0	0	0	0	0	0	0	0	0	0	0	0	0	0	0	0	0	0	0	0	0	0	0	0	0	0	0	0	0	0	0
ENSG00000135631	RAB11 family interacting protein 5 (class I) [Source:HGNC Symbol;Acc:24845]	2	73300510	73383849	RAB11FIP5	protein_coding	0.907477	3.26654	0	0	2.50093	0	0	3.13748	0	0	0	2.22279	0	0.614652	0	0	2.47916	0	1.8228	0	0	0	0	0	1.17652	0	0.711054	0	5.20353	0	0	2.6116	0	0	6.4077	5.52298	0	0	0	0	4.38355	0	0
ENSG00000214548	maternally expressed 3 (non-protein coding) [Source:HGNC Symbol;Acc:14575]	14	101245747	101327368	MEG3	lincRNA	8.14329	2.21204	1.53035	2.0704	4.04842	3.8572	7.47839	2.53139	1.19076	1.324	2.47327	1.72185	1.84852	8.82045	1.87969	8.41253	8.33857	3.9001	3.74297	1.1012	2.04961	5.94586	3.1123	3.0951	3.50106	7.63098	6.80288	2.94708	8.39422	8.51201	2.40668	5.55254	8.55597	4.1352	7.4339	4.18786	1.81448	4.7201	8.82223	1.98811	9.65983	0.848357	1.9707
ENSG00000173114	leucine rich repeat neuronal 3 [Source:HGNC Symbol;Acc:17200]	7	110731062	110765510	LRRN3	protein_coding	0	0	0	0	0	0	7.02212	0	0	0	4.11266	0	0	0	0	6.53132	0	0	0	0	0	0	0	0	0	10.8992	0	0	3.44698	3.71963	0	0	3.49003	0	0	8.75055	0	0	0	0	0	0	0
ENSG00000150093	integrin, beta 1 (fibronectin receptor, beta polypeptide, antigen CD29 includes MDF2, MSK12) [Source:HGNC Symbol;Acc:6153]	10	33189247	33294720	ITGB1	protein_coding	6.22734	9.65847	9.65751	8.51734	8.42855	6.36792	7.63261	8.46964	10.0296	8.5798	9.59197	9.17207	7.28603	8.8103	9.85689	4.98271	9.39473	6.51253	11.584	9.05727	9.40155	11.9932	9.9546	9.65556	9.74565	8.91381	9.96909	9.90701	5.60507	5.67686	8.03117	4.56304	5.5032	8.85692	8.03831	7.14196	7.82123	9.26068	0	8.96933	4.48552	9.6021	8.183
ENSG00000110321	eukaryotic translation initiation factor 4 gamma, 2 [Source:HGNC Symbol;Acc:3297]	11	10818597	10830657	EIF4G2	protein_coding	9.47242	9.83321	10.4667	8.97191	8.83415	9.37235	9.83384	7.55908	7.98697	8.75351	9.53473	5.76525	9.56057	8.79962	4.98558	10.3798	5.10171	9.30437	9.56845	7.43685	9.10941	8.99769	9.43242	7.13541	9.45089	8.67718	10.1556	5.36115	9.51408	8.77895	8.336	10.5815	8.69096	8.03549	7.45445	4.53767	9.17943	9.6688	6.79575	9.09963	8.04403	8.8393	8.97891
ENSG00000086548	carcinoembryonic antigen-related cell adhesion molecule 6 (non-specific cross reacting antigen) [Source:HGNC Symbol;Acc:1818]	19	42254885	42276113	CEACAM6	protein_coding	0	0	0	0	0	0	0	0	0	0	0	0	0	0	0	0	0	0	0	0	0	0	0	0	0	0	0	0	0	0	0	0	0	0	0	0	0	0	0	0	0	0	0
ENSG00000137700	solute carrier family 37 (glucose-6-phosphate transporter), member 4 [Source:HGNC Symbol;Acc:4061]	11	118894824	118901616	SLC37A4	protein_coding	6.86884	7.50851	4.14432	8.18178	1.22131	4.20574	7.27294	0	5.06592	3.32072	0	5.59323	0	1.37494	0	0	5.91849	0	0	5.52862	5.01039	0	0	4.73584	4.1197	0	9.00859	0	8.53635	0.685898	6.65537	8.79765	0	0	7.014	2.06183	4.20327	0	0	2.48091	1.33838	7.74336	0.552999
ENSG00000159200	regulator of calcineurin 1 [Source:HGNC Symbol;Acc:3040]	21	35885440	35987441	RCAN1	protein_coding	8.17118	1.76439	0	0	1.58369	0	2.83237	0.902792	1.06373	0.0703253	1.23996	1.23204	0	1.24193	0.436993	0.995815	3.88489	2.36844	5.45003	0.569693	0	1.64378	1.79696	0.508504	2.84941	1.43424	0.839862	0	3.28329	1.57448	1.11762	10.0929	0.64953	2.04459	0	0	3.00215	0	0	1.3743	2.02054	0	0.828176
ENSG00000120437	acetyl-CoA acetyltransferase 2 [Source:HGNC Symbol;Acc:94]	6	160181360	160200144	ACAT2	protein_coding	0	0	4.92866	0	0	0	5.30589	5.02633	0	4.58367	1.06118	0	3.04409	4.48382	0	5.39985	7.02472	3.35718	6.89176	0	7.843	9.85359	0	0	0	6.47946	7.67386	9.20049	8.27678	3.44915	6.24562	0	0	6.21238	7.77513	2.42948	0	0	8.62698	2.32472	0	0	3.74843
ENSG00000125772	glycerophosphocholine phosphodiesterase GDE1 homolog (S. cerevisiae) [Source:HGNC Symbol;Acc:26957]	20	5525085	5591672	GPCPD1	protein_coding	0	0.655252	0	0	5.63234	0	1.76063	3.00357	0	0.584514	0	0.493187	4.89681	0	0	0	3.7463	9.71358	0	0	2.67331	0	1.28621	0	5.45453	8.5082	0	0	0.557475	2.94406	4.92533	0	4.46207	7.12041	0	0	0	0	4.02754	1.10139	0	0	0
ENSG00000244754	NEDD4 binding protein 2-like 2 [Source:HGNC Symbol;Acc:26916]	13	33006554	33112970	N4BP2L2	protein_coding	6.74727	8.28845	3.37612	5.87687	7.94908	8.55434	9.62181	7.65231	7.11304	8.27318	5.70974	7.43305	8.38789	9.91754	7.41149	7.39227	7.1834	7.6256	8.13605	8.14982	8.1977	9.25789	8.99864	7.2704	8.62172	9.85612	6.33771	7.39828	6.94658	9.19168	8.22841	8.20904	8.75254	8.2113	7.87923	7.6846	3.41176	6.75017	8.74267	7.00255	9.08231	5.49116	7.39019
ENSG00000110723	exophilin 5 [Source:HGNC Symbol;Acc:30578]	11	108376158	108464465	EXPH5	protein_coding	9.75983	3.86695	2.70757	2.80927	3.35724	3.26463	4.78741	3.69568	3.35373	4.51157	9.35739	3.74742	3.97024	7.54497	3.59453	8.15634	4.36758	5.21736	3.51538	3.07486	4.41815	3.84955	4.6107	2.91618	3.18647	8.54322	4.5847	2.56095	8.94545	9.95711	4.33038	6.01293	6.05227	8.25996	4.40573	5.12056	3.21537	3.07852	8.06	4.44541	6.66809	3.81884	3.7323
ENSG00000148346	lipocalin 2 [Source:HGNC Symbol;Acc:6526]	9	130911350	130915734	LCN2	protein_coding	0	0	0	0	0	0	0	0	0	0	0	0	0	0	0	0	0	0	0	0	0	0	0	0	0	0	0	0	0	0	0	0	0	0	0	0	0	0	0	0	0	0	0
ENSG00000225470	JPX transcript, XIST activator (non-protein coding) [Source:HGNC Symbol;Acc:37191]	X	73164159	73290243	JPX	lincRNA	6.50553	5.42863	3.31938	4.83216	5.07739	7.4356	6.09211	5.33659	3.46349	7.37713	7.84281	5.19424	6.21952	6.59852	3.68967	3.28376	5.44258	7.44411	6.74487	7.21443	6.61087	6.65053	7.72255	2.58869	5.28325	8.34624	5.68903	4.48746	5.5188	5.98401	6.08275	6.39371	7.68802	4.20955	6.75156	4.13887	4.2519	5.23256	4.65664	5.03749	7.46008	4.86874	4.89355
ENSG00000132341	RAN, member RAS oncogene family [Source:HGNC Symbol;Acc:9846]	12	131356424	131362223	RAN	protein_coding	9.10471	7.52662	9.35533	7.30708	8.48862	8.17187	6.94031	4.43656	6.96082	8.27478	8.57212	8.64088	6.13339	4.47557	7.45438	8.06179	8.86952	7.73156	8.61211	8.21033	8.17379	6.56913	7.91033	8.18619	8.15902	6.27339	8.53069	8.44815	9.13644	8.47769	8.45702	8.32905	7.82862	8.64034	8.73639	8.49949	8.47377	9.1754	5.33801	6.85252	1.33838	8.03512	9.69643
ENSG00000043093	DCN1, defective in cullin neddylation 1, domain containing 1 [Source:HGNC Symbol;Acc:18184]	3	182655862	182703741	DCUN1D1	protein_coding	5.13977	3.90122	6.05018	1.18771	2.17484	8.322	7.38775	6.11663	2.45557	3.3514	8.29106	7.38672	8.67686	4.77415	6.2172	7.11482	7.2572	6.17998	7.11032	1.74267	4.5802	6.42754	2.6343	2.89316	7.8609	2.68725	5.19435	1.88652	7.00221	2.12031	6.48402	3.87268	4.93566	6.0633	1.79704	7.00786	4.10956	7.19635	5.78576	8.41294	2.1304	0	5.66877
ENSG00000134982	adenomatous polyposis coli [Source:HGNC Symbol;Acc:583]	5	112043195	112181936	APC	protein_coding	4.9742	7.85864	3.97098	6.43539	5.59308	8.29836	6.69987	9.3571	9.50555	2.58384	6.67323	5.32642	6.66556	3.5716	7.1358	8.59004	7.40501	5.36223	3.72037	3.90376	8.12597	0	4.01294	7.45827	6.96013	5.44023	0	7.5416	3.3832	5.18209	8.39764	1.70655	5.55647	9.02587	5.92906	2.52675	6.061	7.91905	2.78405	6.06088	0	7.36771	7.92743
ENSG00000120438	t-complex 1 [Source:HGNC Symbol;Acc:11655]	6	160199530	160210781	TCP1	protein_coding	9.82074	8.89961	3.04392	0	4.43559	4.73836	1.60697	3.75272	0	0	0	3.31703	8.99997	7.05102	7.47738	6.31711	0	7.76488	0.592192	2.99707	0	9.13452	1.65915	8.30129	4.99448	4.29749	8.24288	4.53762	6.48372	7.51428	6.54791	0	4.73279	8.32824	4.61248	10.0285	7.81566	0	1.80345	4.39564	3.1116	0	9.17513
ENSG00000151012	solute carrier family 7 (anionic amino acid transporter light chain, xc- system), member 11 [Source:HGNC Symbol;Acc:11059]	4	139085251	139163503	SLC7A11	protein_coding	3.38112	3.71671	1.62078	1.09802	1.171	1.12069	2.06784	2.16936	3.37707	3.30403	1.60199	3.00544	2.90994	3.22008	0.440326	1.97004	1.78986	3.90896	4.72425	1.19514	4.10523	2.24706	3.54642	1.73489	3.51623	3.12248	1.75804	2.5537	2.83716	3.45637	2.7285	4.3393	3.52324	0.162543	0	3.40449	2.13082	0.676104	1.71825	0.277318	3.85018	6.59887	2.97579
ENSG00000251637		11	67653948	67673821	RP11-119D9.1	lincRNA	2.60705	5.32257	1.85171	0.655888	3.73665	2.05664	6.93722	2.05215	3.91867	2.94369	2.77222	2.36654	3.12316	4.52966	1.83101	1.48228	2.25253	8.54487	1.72209	3.97298	4.79039	2.64117	4.89126	2.00168	3.55078	5.43421	4.93462	4.75213	2.94714	3.67082	5.54065	6.89095	4.13976	3.4663	6.86739	5.60887	6.33014	3.78202	1.56591	2.66286	6.37368	2.61177	3.08068
ENSG00000073536	notchless homolog 1 (Drosophila) [Source:HGNC Symbol;Acc:19889]	17	33455772	33469334	NLE1	protein_coding	0.64604	0.824038	0	1.20102	0	0	0.857647	0	0.51357	0	0	0	0	0.629589	0	0	0	1.43151	0	0	0	0	1.66898	0	0	0	0	0	0	0.749961	0	0	0	0	0	1.09253	1.9344	0	1.26028	0.885777	0	0	0
ENSG00000134827	transcobalamin I (vitamin B12 binding protein, R binder family) [Source:HGNC Symbol;Acc:11652]	11	59620273	59634048	TCN1	protein_coding	0	0	0	0	0	0	0	0	0	0	0	0	0	0	0	0	0	0	0	0	0	0	0	0	0	0	0	0	0	0	0	0	0	0	0	0	0	0	0	0	0	0	0
ENSG00000083642	PDS5, regulator of cohesion maintenance, homolog B (S. cerevisiae) [Source:HGNC Symbol;Acc:20418]	13	33160564	33352157	PDS5B	protein_coding	5.06191	7.79284	5.47173	6.54551	0	9.41563	4.81092	7.61468	5.90703	8.47642	5.48631	7.4413	6.76941	2.8825	7.81082	1.2874	9.00967	6.90361	6.52119	6.89795	6.91505	9.58171	6.13064	8.86005	7.53143	9.31193	3.21428	3.10406	5.08824	4.17342	9.31756	7.29043	7.5509	3.74661	2.67663	1.04151	1.20575	0	0	8.68747	10.0669	9.97952	7.94395
ENSG00000103769	RAB11A, member RAS oncogene family [Source:HGNC Symbol;Acc:9760]	15	66018392	66184329	RAB11A	protein_coding	8.92833	9.49324	8.91535	6.60213	8.52292	9.23755	9.49884	7.3247	8.73967	7.66325	7.68432	9.29372	8.05943	8.98144	10.0308	8.94425	6.59931	8.80041	8.89629	9.44055	8.74833	7.5945	5.58196	8.20346	8.52348	8.3235	9.61752	9.23188	9.94314	8.53665	6.56609	5.98126	8.05257	9.7877	8.83454	6.64357	9.25499	10.2371	8.65454	8.15623	8.27146	9.51527	8.68924
ENSG00000185722	ankyrin repeat and FYVE domain containing 1 [Source:HGNC Symbol;Acc:20763]	17	4067201	4167274	ANKFY1	protein_coding	0	0	4.4119	2.05948	1.78664	0	0.844913	0	0.560336	6.89112	6.76257	5.38852	1.2256	0.687837	6.16503	0	5.85017	0.233375	5.3772	2.57156	1.57699	1.85458	3.06719	0.699251	2.43592	5.01595	1.85268	5.05055	0	4.68547	5.71843	0	1.71633	2.99847	3.76395	10.3962	0	0	5.51041	2.55027	2.02054	0.986372	0
ENSG00000093183	SEC22 vesicle trafficking protein homolog C (S. cerevisiae) [Source:HGNC Symbol;Acc:16828]	3	42589461	42642572	SEC22C	protein_coding	7.83625	5.09544	3.50382	0.611701	0	7.74318	6.93111	1.73814	2.64401	5.67718	0	1.90255	3.96884	3.17583	1.43798	0	8.99151	3.36188	2.45324	4.25986	5.16087	8.00938	2.98568	0.657213	0.888082	8.08868	6.78923	7.21437	2.70981	3.0153	3.69964	3.79056	5.68162	1.53763	7.3555	1.35975	4.87155	3.80914	4.80501	3.73751	9.09305	6.82098	7.05774
ENSG00000139644	transmembrane BAX inhibitor motif containing 6 [Source:HGNC Symbol;Acc:11723]	12	50101508	50158717	TMBIM6	protein_coding	9.12634	9.48531	10.2513	11.3908	8.94347	10.823	9.58589	9.97554	7.94253	10.3628	9.2386	9.90377	10.4751	9.7543	8.55485	9.98831	10.9021	8.90212	10.5593	9.66542	9.58022	9.12876	9.5589	11.5689	10.5252	10.1463	11.0189	9.86583	9.17815	9.5134	10.2776	8.93098	10.2502	11.4283	9.65865	8.64199	9.39168	8.98596	9.96687	8.99823	7.13041	10.1681	10.0844
ENSG00000148672	glutamate dehydrogenase 1 [Source:HGNC Symbol;Acc:4335]	10	88810243	88854623	GLUD1	protein_coding	6.20336	7.43373	0.737545	7.49195	1.58369	0.451049	6.44269	4.8227	5.81163	4.58367	3.81143	2.91089	0	4.96706	4.68556	0.44384	0	6.77734	6.56825	6.01759	0.741889	6.06812	7.77945	5.44021	8.18737	9.16615	7.56645	0.883044	7.47861	6.24547	0	6.61654	7.77719	6.07865	0	2.77001	8.35597	1.81803	6.68453	0	7.17688	1.61621	4.36594
ENSG00000129116	palladin, cytoskeletal associated protein [Source:HGNC Symbol;Acc:17068]	4	169418217	169849608	PALLD	protein_coding	5.69606	7.31453	5.53705	8.11768	8.84781	1.07115	4.89091	8.27423	6.29263	8.0541	6.45829	7.41759	9.43032	5.72946	4.88217	8.90066	10.1487	1.90397	8.14503	5.61353	7.08186	6.00816	9.58132	9.48943	10.109	3.14479	9.06812	7.75113	1.82281	7.26237	8.82114	6.73926	5.1576	3.63563	4.07221	1.3716	6.94698	0	2.69372	5.6839	7.78875	7.16538	7.40119
ENSG00000172954	lysocardiolipin acyltransferase 1 [Source:HGNC Symbol;Acc:26756]	2	30670092	30867091	LCLAT1	protein_coding	5.63381	9.5185	8.2758	9.59447	6.60347	9.50682	9.20762	9.55807	8.4972	8.18841	8.72922	8.37307	7.55606	9.01852	7.20033	4.31579	10.0108	7.94748	8.26123	9.29617	9.52384	7.86342	9.66214	9.00164	9.3595	6.60027	9.43436	3.61667	8.56661	5.92236	9.14407	7.16346	6.95665	6.59077	9.33791	7.85183	5.43579	6.97553	8.16713	7.98029	6.81459	9.74873	8.07656
ENSG00000169239	carbonic anhydrase VB, mitochondrial [Source:HGNC Symbol;Acc:1378]	X	15706953	15805747	CA5B	protein_coding	5.32074	7.53223	4.58635	4.69153	6.36316	3.37542	5.52726	4.95157	4.18395	5.3506	3.74634	5.32349	5.4092	6.18293	3.49869	4.50414	5.68915	6.47262	6.50483	4.85196	5.89992	5.48709	7.1543	4.1633	5.88372	6.41819	6.00013	3.24241	5.73928	6.26524	5.31632	6.08034	6.1492	4.13357	5.37504	3.34487	7.9829	3.19519	5.51933	6.14421	7.09052	3.24953	4.91292
ENSG00000003989	solute carrier family 7 (cationic amino acid transporter, y+ system), member 2 [Source:HGNC Symbol;Acc:11060]	8	17354597	17428082	SLC7A2	protein_coding	8.32092	7.64322	9.65668	9.16875	9.1075	7.33772	9.1146	8.6153	8.66048	7.85041	8.83954	6.44957	8.28841	7.32514	7.05997	4.10517	8.67094	7.77075	0	6.69249	9.57387	0.628758	10.0272	9.93222	7.57499	9.00239	10.4445	7.29247	0	7.87867	9.45497	6.25203	8.25993	8.14591	9.12345	7.95497	7.19441	0.881272	0	10.2506	4.90905	9.49366	7.48363
ENSG00000105372	ribosomal protein S19 [Source:HGNC Symbol;Acc:10402]	19	42363988	42376994	RPS19	protein_coding	8.19096	7.42893	8.44298	7.12259	9.33721	8.35919	7.77549	5.8963	7.57626	7.62656	9.5206	8.47066	7.89378	6.39766	7.56586	7.95065	6.34699	8.73477	10.0389	9.16994	8.3945	7.67402	8.70338	8.32639	7.66281	7.71493	6.13844	7.77087	8.22261	7.36032	8.60623	8.71748	8.54696	8.2509	9.32293	9.14892	8.64611	9.38976	7.27521	7.92984	4.58168	7.42133	8.02755
ENSG00000145730	peptidylglycine alpha-amidating monooxygenase [Source:HGNC Symbol;Acc:8596]	5	102089685	102366809	PAM	protein_coding	9.89427	10.6678	10.6975	10.9175	9.66284	7.40487	10.2962	5.1894	8.11931	11.3084	9.09405	10.4539	10.4914	7.34413	9.81404	8.88535	10.9873	7.70289	2.60297	10.2337	9.38947	0	0.781936	8.75692	10.8078	11.3899	9.56437	7.25708	10.0619	9.54901	9.7188	4.21149	9.74286	8.98543	7.73977	7.76447	9.10722	11.0064	10.462	2.62183	6.71356	11.7572	11.0121
ENSG00000115461	insulin-like growth factor binding protein 5 [Source:HGNC Symbol;Acc:5474]	2	217536828	217560248	IGFBP5	protein_coding	3.86536	0	2.93986	1.03992	0	0	0	0	5.49315	4.39104	8.6247	0.493187	0.589865	4.63828	0	6.94386	0	0	7.20134	3.60573	0	12.4674	0	0	3.8937	0	0	1.1804	0	5.61729	3.38207	0	0	0	7.28185	2.06183	0	0	7.31101	1.44277	4.98065	0	4.49109
ENSG00000185917	SET domain containing 4 [Source:HGNC Symbol;Acc:1258]	21	37406839	37451687	SETD4	protein_coding	3.22367	2.9679	0	6.57362	2.75398	0	3.46148	4.1674	1.48768	3.96314	2.03581	3.50588	2.74037	4.01389	2.77179	1.16063	6.66426	4.98915	2.56016	4.44178	2.09799	3.02683	3.27232	0.460424	2.40708	3.89578	3.83414	2.44158	2.39618	2.48275	1.98981	4.40791	3.1266	2.84928	2.14664	2.41094	0.530303	1.78845	2.67788	3.14807	3.33347	0	3.53654
ENSG00000161638	integrin, alpha 5 (fibronectin receptor, alpha polypeptide) [Source:HGNC Symbol;Acc:6141]	12	54789045	54813244	ITGA5	protein_coding	0	0	0	0	0	0	0	0	0	0	0	0	0	0	0	0	0	0	9.39767	0	0	9.30853	0	0	0	0	0	0	0	0	0	0	0	0	0	0	0	0	0	0	0	0	0
ENSG00000114999	tubulin tyrosine ligase [Source:HGNC Symbol;Acc:21586]	2	113239731	113299316	TTL	protein_coding	0	7.44329	0	0	1.58369	0	0	0	5.59876	7.06475	4.30997	8.12386	0	0	1.52531	5.97631	0	0	6.28809	0	0	6.89465	0	0	0	2.13536	0	0	0	2.21792	4.95142	0	5.24651	7.51074	7.19601	0	0	5.23369	2.90238	0	4.27383	0	7.06248
ENSG00000084090	StAR-related lipid transfer (START) domain containing 7 [Source:HGNC Symbol;Acc:18063]	2	96850597	96874563	STARD7	protein_coding	6.1348	6.21158	6.92553	4.44942	8.78241	0.824378	6.07415	8.54147	0.959733	6.38307	7.46286	7.03069	0.932961	2.55621	6.65764	2.08841	6.46068	5.48204	4.32135	7.59456	6.60241	9.38641	4.93433	7.86586	6.27204	0.752192	1.17713	2.28545	8.92893	4.26534	6.65267	9.58622	6.51348	9.06776	6.94915	0.777712	5.57989	8.17077	4.83299	0.821764	1.8597	0.620188	5.90045
ENSG00000137710	radixin [Source:HGNC Symbol;Acc:9944]	11	110045605	110167447	RDX	protein_coding	8.66859	3.57567	7.39662	6.30657	4.34396	6.16667	2.0651	6.65589	8.50106	6.07549	0.44595	5.59323	0	1.04431	3.2878	6.914	8.97448	8.53356	7.17118	7.00118	6.97025	8.16054	1.11469	6.35273	8.3298	5.30229	0	2.49658	8.03517	7.25905	6.76239	5.96212	8.57095	8.65819	7.682	3.53404	1.45528	0	7.16937	0	2.83081	4.32966	8.40601
ENSG00000213719	chloride intracellular channel 1 [Source:HGNC Symbol;Acc:2062]	6	31698358	31707540	CLIC1	protein_coding	9.12973	4.43936	3.37054	8.91781	7.12437	5.68043	5.78499	8.30073	5.59876	6.1072	7.73399	8.03441	7.49436	8.14767	4.59502	8.56693	7.4378	6.96282	8.39438	7.48263	0	5.66412	8.03428	8.94355	7.58927	8.97021	7.3335	5.71425	5.85984	6.24547	7.67975	8.18081	5.76696	9.40576	8.18812	8.4058	9.14373	8.88936	8.98685	4.83263	0	10.1952	6.72935
ENSG00000134109	ER degradation enhancer, mannosidase alpha-like 1 [Source:HGNC Symbol;Acc:18967]	3	5229331	5261642	EDEM1	protein_coding	8.92142	7.64322	7.74066	8.40271	0	0	8.164	6.20043	6.09924	8.04851	0	8.3425	9.02166	9.14783	7.976	8.33877	7.63234	8.3971	7.92537	0	0	9.34049	7.72652	8.19482	6.57779	7.15947	0	7.97824	9.06962	3.25124	8.80342	0	0	9.21749	8.11828	1.3716	9.2809	3.93678	9.31622	3.17302	0	0	9.00012
ENSG00000169895	synapse associated protein 1 [Source:HGNC Symbol;Acc:16273]	X	16737755	16783459	SYAP1	protein_coding	8.34249	7.7028	7.6805	6.54274	8.7579	7.05922	7.20512	6.6321	7.08341	6.89959	5.63704	5.66231	5.31514	8.66707	5.12814	5.22872	7.36066	8.84406	7.79637	8.20554	8.04183	6.51423	7.32571	4.77752	6.96006	8.18044	7.84098	6.74308	8.78253	8.20661	6.31377	6.58242	7.03092	7.0115	6.85892	8.76691	6.01014	5.3238	8.27899	7.67144	7.44409	5.31446	5.94718
ENSG00000109606	DEAH (Asp-Glu-Ala-His) box helicase 15 [Source:HGNC Symbol;Acc:2738]	4	24519064	24586173	DHX15	protein_coding	9.04718	4.88785	2.81271	0	0	6.55243	8.07706	9.93305	0.51357	8.12794	0.476317	8.03259	0.589865	3.03707	4.75161	0.73674	8.31107	1.50984	6.30994	0	1.21696	0.245762	3.57805	2.77159	6.6839	8.78413	0.948615	3.10406	3.09543	2.03717	4.67625	0.766423	3.68634	5.14106	5.06839	6.09811	3.28341	2.22116	6.67434	0	1.42307	1.37039	3.94195
ENSG00000196533	chromosome 1 open reading frame 186 [Source:HGNC Symbol;Acc:25341]	1	206238872	206288647	C1orf186	protein_coding	3.42589	2.3744	0	1.36971	2.30494	0.619056	3.87009	1.20325	1.80261	1.78145	0.44595	3.23385	1.36509	1.8786	0	1.41371	1.30877	3.98024	1.8836	1.06955	2.82338	1.12424	1.40071	0.36897	2.71741	2.90224	1.66836	0	1.45446	2.95769	0.994556	2.1575	2.3505	0	2.6562	1.45194	0	3.76782	0	2.346	1.07084	0	1.27227
ENSG00000170242	ubiquitin specific peptidase 47 [Source:HGNC Symbol;Acc:20076]	11	11862970	11980870	USP47	protein_coding	8.478	6.36867	6.50923	5.76378	8.52297	0.451049	6.50725	8.52043	7.05196	6.91753	8.56524	8.12597	0	8.06995	0.392954	0	1.85388	5.44763	5.3609	4.51617	4.73063	7.2035	6.54052	6.35273	5.61153	5.5488	0.711054	7.34586	8.46111	7.29863	5.37417	1.67391	8.98452	0.995536	7.36812	2.52675	0.521576	9.76058	7.59643	0	2.83081	9.25964	0.552999
ENSG00000089199	chromogranin B (secretogranin 1) [Source:HGNC Symbol;Acc:1930]	20	5892076	5906007	CHGB	protein_coding	10.0626	12.6094	13.9238	13.0461	13.0942	12.0926	14.0009	12.7343	12.0676	14.0983	10.5192	12.9333	12.5697	9.15592	12.7548	10.2926	11.9683	11.3463	2.83923	12.7318	12.5603	1.81257	8.14197	12.503	12.43	11.0562	12.7962	12.6242	9.92397	11.4886	11.9405	13.164	10.4112	11.0719	9.56929	12.8401	12.5661	13.2022	12.7558	10.8926	9.99503	14.446	11.9894
ENSG00000129422	microtubule associated tumor suppressor 1 [Source:HGNC Symbol;Acc:29789]	8	17501304	17658426	MTUS1	protein_coding	8.48919	8.22101	9.55385	8.99449	0.899581	3.34708	4.21066	3.07208	0	6.80357	0	6.21644	9.562	0	0	0	6.9803	5.65335	7.88335	6.35497	0	1.46408	1.28621	6.84108	8.86395	5.03	0	0.853014	0	1.78534	7.53346	7.71905	7.27812	3.45131	0.725284	4.2697	8.63004	0	6.2324	4.94367	4.58076	7.36808	8.6965
ENSG00000162374	ELAV like neuron-specific RNA binding protein 4 [Source:HGNC Symbol;Acc:3315]	1	50513686	50669458	ELAVL4	protein_coding	5.11756	0	6.29298	0	0	0	5.07221	2.1731	0	0	4.87049	0	2.9196	9.05723	6.6109	5.92592	0	5.67712	0	0	0	0	0	4.955	7.08591	8.45571	1.827	0	0	1.14887	5.41223	7.29715	4.56963	6.73933	6.61596	1.04151	0	0	0	3.42462	6.9813	0	0
ENSG00000131018	spectrin repeat containing, nuclear envelope 1 [Source:HGNC Symbol;Acc:17089]	6	152442819	152958936	SYNE1	protein_coding	4.25035	6.7024	5.46674	1.37559	1.34367	1.31198	6.80592	7.69564	3.2686	7.73834	6.30024	3.16144	3.94254	9.55777	6.82753	7.76422	6.56775	5.88613	7.64999	7.02639	6.81901	8.60174	9.87507	2.70028	2.13637	6.85677	4.47534	1.57112	3.41417	8.82698	3.80583	3.39941	4.03706	2.19777	8.60635	8.06603	6.24331	2.08321	3.1183	2.40336	7.48959	6.09773	2.75796
ENSG00000186815	two pore segment channel 1 [Source:HGNC Symbol;Acc:18182]	12	113658855	113736390	TPCN1	protein_coding	0.907477	7.22783	2.11659	0	0	4.3015	7.14893	4.93731	6.68918	5.62804	0	4.07848	0	0	6.85674	0	0	0	2.82587	0.551476	3.0697	2.56465	0	7.86766	3.29605	0	0	0	1.52945	0.685898	1.41324	7.79616	5.59092	5.75941	0	0	5.57292	0.881272	0	2.62183	0	0	0
ENSG00000186575	neurofibromin 2 (merlin) [Source:HGNC Symbol;Acc:7773]	22	29999545	30094587	NF2	protein_coding	7.675	4.43975	3.71796	2.66057	1.40662	7.44542	5.50897	4.25958	2.88686	5.76713	8.88769	3.95615	7.15896	6.41501	0.994552	8.79084	7.20408	6.49325	7.80153	2.71554	5.86822	8.40938	4.61706	7.96472	6.44217	5.94583	4.67776	3.01345	4.85161	4.17925	8.31357	5.05963	8.5117	3.70214	3.48387	11.3949	1.52024	2.72323	5.49014	6.0497	6.14411	2.45076	3.37768
ENSG00000232931	long intergenic non-protein coding RNA 342 [Source:HGNC Symbol;Acc:42470]	2	96472866	96481963	LINC00342	lincRNA	4.25367	3.568	1.58593	0	1.96206	3.15655	1.8204	4.61085	2.51937	6.06293	0.44595	1.3862	3.29411	5.85657	3.23073	1.83526	5.01162	4.45853	0	0.574212	3.94442	3.70536	2.01036	3.22038	4.04621	2.87581	1.39895	0	0	2.39365	1.07649	2.33294	3.28143	0.591535	3.23113	0	4.33364	0	2.51356	4.60504	5.68628	0	2.7196
ENSG00000124422	ubiquitin specific peptidase 22 [Source:HGNC Symbol;Acc:12621]	17	20902910	20947073	USP22	protein_coding	7.70226	5.15857	5.16785	7.73586	8.14971	6.11825	7.98771	7.05541	5.98643	7.49524	7.90022	6.89039	6.14754	8.66929	5.74097	4.15532	7.72739	8.78184	8.50769	3.24392	6.83124	8.68501	8.46543	6.32168	7.02983	8.70625	5.39003	7.17601	8.4066	7.3623	8.29413	5.28442	7.57884	1.93637	7.81986	5.23445	4.29287	6.59735	8.44394	8.70483	6.32857	4.00715	5.97198
ENSG00000064607	SURP and G patch domain containing 2 [Source:HGNC Symbol;Acc:18641]	19	19101697	19144832	SUGP2	protein_coding	5.00186	0	0	6.32389	1.74139	5.64573	1.25418	4.91063	0	4.11684	0	0	6.56633	5.69289	1.19133	1.78337	3.20323	3.03983	5.48984	0.96332	7.28677	1.74364	5.80812	5.08134	2.22849	3.71373	1.08483	3.09767	2.59173	2.26253	4.21494	7.34472	6.86278	2.95383	5.11404	2.06366	6.17843	7.42016	0	1.55671	7.67713	3.85944	0.75419
ENSG00000114857	natural killer-tumor recognition sequence [Source:HGNC Symbol;Acc:7833]	3	42642106	42690227	NKTR	protein_coding	7.78068	6.96384	7.18744	6.97912	9.32378	6.97784	8.46354	3.04711	8.24758	9.00222	3.63885	6.90959	4.70395	8.1723	1.76609	0	8.19725	2.21321	4.54891	4.60165	8.37591	7.98009	8.22253	6.77467	9.04164	9.9041	9.45521	0.849638	7.13324	5.38043	9.50007	9.3392	8.43097	7.41675	7.8171	5.91538	1.45528	5.71045	8.86887	9.05806	7.6419	1.37039	9.34832
ENSG00000166526	zinc finger protein 3 [Source:HGNC Symbol;Acc:13089]	7	99661656	99680171	ZNF3	protein_coding	1.52093	0	2.29785	0	6.52074	0	7.60797	2.80776	0	4.35557	0.786113	0.570448	0.77585	9.41368	0	2.49836	9.88103	5.55979	1.06783	1.29979	0	4.52849	1.67224	0.549299	4.37586	6.89292	3.03641	2.27416	4.74424	3.97774	0.773741	3.9814	2.63434	5.17618	6.35217	4.38855	0	2.6094	1.41482	8.38429	5.4922	1.54905	2.24399
ENSG00000071282	LIM and cysteine-rich domains 1 [Source:HGNC Symbol;Acc:6633]	3	8543393	8609805	LMCD1	protein_coding	2.1709	0	7.41929	3.65733	0	0.451049	0	5.02633	0	6.44988	0	1.94593	0	0	7.7987	0	9.44536	8.98778	8.06042	0	0	0	7.05936	9.58614	1.17652	0	0	0	0	2.94406	0	0	0	0	0	0	4.69068	0	4.35261	3.88239	0	4.9277	4.71288
ENSG00000172915	neurobeachin [Source:HGNC Symbol;Acc:7648]	13	35516424	36247159	NBEA	protein_coding	8.67633	6.79859	0	0	5.42441	6.21023	7.04839	8.21054	6.42774	8.51434	0	7.41052	6.4068	10.4998	3.14192	9.35411	8.31006	2.77668	3.81393	5.80578	9.3168	0	5.51112	0	8.54382	9.1887	5.38432	7.05666	0	5.44656	6.25801	4.60693	7.30332	7.38772	8.69735	7.92387	3.62335	7.57645	6.87024	0	7.98432	7.71527	8.03669
ENSG00000151023	enkurin, TRPC channel interacting protein [Source:HGNC Symbol;Acc:28388]	10	25270908	25305089	ENKUR	protein_coding	0	0	0	0	0	0	0	0	0	0	0	0	0	0	0	0	0	0	0	0	0	0	0	0	0	0	0	0	0	0	0	0	0	0	0	0	0	0	0	0	0	0	0
ENSG00000231925	TAP binding protein (tapasin) [Source:HGNC Symbol;Acc:11566]	6	33267471	33282164	TAPBP	protein_coding	5.71639	8.94987	8.77665	8.15784	8.36518	6.59944	9.17808	7.3196	4.038	8.72843	2.55468	7.11386	5.68396	5.6871	8.88157	7.79943	8.72861	6.49244	10.7067	6.96308	7.56992	8.92261	8.31796	3.82889	10.0635	7.3723	9.75709	2.10328	10.4383	10.2449	9.85245	6.84586	10.0508	9.68515	8.12804	4.84154	6.8759	3.80262	8.88772	4.42863	5.22252	6.88529	9.22715
ENSG00000100580	transmembrane emp24 protein transport domain containing 8 [Source:HGNC Symbol;Acc:18633]	14	77801364	77843452	TMED8	protein_coding	2.0571	9.55963	9.05401	3.53122	5.69004	1.67907	7.26557	3.66451	9.50077	0.970195	0	7.44069	0.589865	7.11627	5.07124	10.9799	0.952152	7.25798	4.48102	8.21262	3.37004	0	8.35314	4.9685	5.30181	7.87486	4.65569	2.06885	0	4.70648	5.66961	7.32475	7.68519	6.45689	0	9.98425	2.29857	3.81562	7.63133	0	2.60656	8.76624	4.94193
ENSG00000165805	chromosome 12 open reading frame 50 [Source:HGNC Symbol;Acc:26665]	12	88373816	88427814	C12orf50	protein_coding	6.60656	5.27195	5.17	0	3.84689	1.12555	5.52602	6.69454	5.04103	4.98488	3.07349	5.42374	4.54977	6.38387	3.45529	4.09182	6.80635	6.18198	5.45671	1.17148	3.81876	3.38239	6.76363	2.56615	5.60911	7.05191	4.83124	1.24606	4.53884	4.1469	5.84002	5.40519	4.32635	5.82916	5.19675	6.37556	5.96659	0	5.87646	3.43	3.76352	3.8109	4.74565
ENSG00000136653	Ras association (RalGDS/AF-6) domain family member 5 [Source:HGNC Symbol;Acc:17609]	1	206680879	206762616	RASSF5	protein_coding	3.98986	0.655252	0	6.47018	1.22131	0	2.88152	5.59063	1.19076	6.29329	9.22207	0.86005	5.05861	5.15085	8.66355	0	0	0	0	5.79372	0	1.0652	0	0.906346	4.52704	1.7059	0	7.47812	8.43579	1.49882	0	1.67391	2.14141	0.995536	0	4.39981	0	0	0	0.653344	8.9771	0	0
ENSG00000144381	heat shock 60kDa protein 1 (chaperonin) [Source:HGNC Symbol;Acc:5261]	2	198351305	198381461	HSPD1	protein_coding	9.25908	6.8215	6.41082	8.43609	5.59308	7.07254	7.26549	6.40681	7.42294	8.46626	9.98647	7.01545	7.75238	9.0149	5.70133	9.34754	7.33227	10.4732	7.2929	6.25597	9.51471	8.5345	9.73365	4.76706	7.45577	9.57181	6.01569	8.98142	7.65778	10.0714	8.74309	0	8.6507	8.12493	8.75852	9.07323	6.11648	1.42438	9.28525	5.65139	4.98065	9.75564	7.11204
ENSG00000143951	WD repeat containing planar cell polarity effector [Source:HGNC Symbol;Acc:28027]	2	63348518	64054977	WDPCP	protein_coding	7.41921	7.63365	6.81239	6.13279	4.88796	6.70518	7.45665	7.411	7.32639	6.72352	4.10144	6.74525	6.89736	7.72621	5.8773	5.99101	8.25593	8.25251	6.26818	6.44946	7.26215	7.08771	7.31127	4.96042	8.53475	8.03385	7.25047	5.27633	6.77172	7.54051	6.94889	7.99558	8.10476	5.7606	6.38171	6.81447	4.63765	7.15833	7.14209	8.19239	8.8007	6.37454	6.75609
ENSG00000072736	nuclear factor of activated T-cells, cytoplasmic, calcineurin-dependent 3 [Source:HGNC Symbol;Acc:7777]	16	68118654	68263162	NFATC3	protein_coding	0	6.83813	1.58593	0	0.270701	0.451049	0.844913	0	0	2.97702	0.44595	0	0	0	0.573766	0	0	0	8.73765	0	3.85942	9.12757	0	0	3.33621	0	0	0	4.41161	0	2.01774	0	6.07861	0	4.90716	2.234	0	0.549028	0	0	0	0	0
ENSG00000160695	vacuolar protein sorting 11 homolog (S. cerevisiae) [Source:HGNC Symbol;Acc:14583]	11	118938403	118952688	VPS11	protein_coding	8.22123	2.54611	0	0.611701	0	4.85034	5.89235	2.50982	5.8456	2.32517	9.8557	2.6171	8.892	5.99806	1.83355	2.22251	1.47065	3.19673	3.05723	0	6.35376	2.58186	3.78947	0.569272	2.20305	8.51039	2.28102	0.32084	7.27078	9.3406	4.56879	1.07724	7.83046	1.88877	5.67662	6.77904	4.00895	1.3309	3.06854	2.17721	1.33838	3.45372	0.482396
ENSG00000168542	collagen, type III, alpha 1 [Source:HGNC Symbol;Acc:2201]	2	189839046	189877472	COL3A1	protein_coding	0	0	0	0	0	0	0	0	0	0	0	0	0	0	0	0	0	0	12.5567	0	0	12.0172	0	0	0	0	0	0	0	0	0	0	0	0	0	0	0	0	0	0	0	0	0
ENSG00000143486	eukaryotic translation initiation factor 2D [Source:HGNC Symbol;Acc:6583]	1	206744620	206785904	EIF2D	protein_coding	7.16556	2.32063	0	0	0	1.85331	0.844913	3.8728	0	3.09389	2.97856	0	0	0	0	0.782777	0.97632	2.37775	3.30182	5.64057	0.741889	0	0	0	7.51164	0	0	0	1.70878	3.71963	7.04881	3.17518	0	0	0	0.61277	0	0	0	6.44002	0	0	1.6025
ENSG00000179222	melanoma antigen family D, 1 [Source:HGNC Symbol;Acc:6813]	X	51546103	51645453	MAGED1	protein_coding	6.24635	8.9302	6.96252	6.00256	9.35222	8.1256	8.06698	8.8519	2.0341	8.95189	1.60543	8.83485	7.04703	8.61802	8.16235	7.12309	8.53913	4.15088	3.39664	9.45042	6.2759	8.27161	7.89785	3.83745	6.67307	4.1458	4.98453	9.56429	6.13644	10.0399	5.71402	7.39772	6.35924	5.49254	7.63453	5.72687	2.63837	8.97602	8.18683	7.07434	4.14761	8.6087	8.24008
ENSG00000117410	ATPase, H+ transporting, lysosomal 21kDa, V0 subunit b [Source:HGNC Symbol;Acc:861]	1	44440159	44443967	ATP6V0B	protein_coding	6.36538	8.75545	8.36922	10.0314	8.20593	9.10061	8.54843	8.64372	8.57085	8.6799	6.53918	9.20833	6.69399	8.03824	8.50226	9.61493	9.52688	3.22667	8.62515	9.7062	7.26958	0.628758	9.5996	8.19051	8.13658	8.96695	8.10281	7.90391	6.87661	8.29124	9.88537	7.52587	8.72044	8.74095	8.68059	9.56052	8.77709	9.84556	7.00199	7.07722	7.91291	9.52431	8.57811
ENSG00000100314	calcium binding protein 7 [Source:HGNC Symbol;Acc:20834]	22	30116073	30127828	CABP7	protein_coding	6.58527	0	0	0	0	0	0	0	0	0	8.23335	0	0	4.81963	0	4.54434	0	7.06545	1.84946	0	0	0	0	0	0	1.19504	0	0	0	4.3983	0	8.69208	0	4.48331	7.03294	0.61277	1.13599	1.37606	7.0794	0	8.42757	0	0
ENSG00000184254	aldehyde dehydrogenase 1 family, member A3 [Source:HGNC Symbol;Acc:409]	15	101417919	101456831	ALDH1A3	protein_coding	0	0	0	0	0	0	0	0	0	0	0	0	0	0	0	0	0	0	3.8274	0	0	0	0	0	0	0	0	0	0	0	0	0	0	0	0	0	0	0	0	0	0	0	0
ENSG00000147872	perilipin 2 [Source:HGNC Symbol;Acc:248]	9	19108373	19149288	PLIN2	protein_coding	6.22574	2.80418	0	0.611701	8.2602	0.794161	7.83304	1.72288	1.13568	3.02119	0	5.94062	5.67058	2.57691	0	1.4484	8.92798	2.8149	12.3064	9.95714	5.46946	10.4402	4.45046	4.21289	6.95779	1.50494	0	7.80316	1.73559	1.65198	7.79703	4.57369	0	0	2.07046	2.85688	0.160392	8.57107	2.55462	7.74204	0	0	3.5278
ENSG00000135624	chaperonin containing TCP1, subunit 7 (eta) [Source:HGNC Symbol;Acc:1622]	2	73460548	73480149	CCT7	protein_coding	2.91995	0	2.50369	7.02066	7.16469	0	4.0114	2.40324	5.59876	6.84416	6.53355	6.92641	7.0089	6.04013	0.95549	0	0	2.11916	6.18115	6.27344	7.91309	0	6.67864	4.70393	5.20629	9.28209	7.09467	0	9.14488	7.77022	7.73711	5.68335	6.91191	0	6.52501	2.06183	9.19453	8.1364	6.36198	7.24459	5.40171	8.61635	4.8824
ENSG00000254647	insulin [Source:HGNC Symbol;Acc:6081]	11	2181009	2182571	INS	protein_coding	14.6071	0	1.58593	0	0	0.451049	0	0	9.2962	1.32112	14.3758	0	0	15.0091	0	13.837	0	0	0	0	0	1.39983	3.26802	1.73615	0	13.9496	0	1.1804	15.1346	14.0717	0	0.790987	8.03975	14.6773	14.5625	8.04733	5.93315	0.506906	15.5229	0.653344	15.7188	0.600669	3.23395
ENSG00000085831	tetratricopeptide repeat domain 39A [Source:HGNC Symbol;Acc:18657]	1	51752930	51810788	TTC39A	protein_coding	6.69683	5.50038	5.74899	3.24016	0.960081	6.21736	1.76063	0	5.709	3.58373	0	3.68021	4.47441	1.04431	0	0	3.51839	8.09577	1.11929	0	2.65032	0	8.22326	0	0.710578	5.72882	5.17362	7.08833	4.56323	1.14887	2.82873	6.97584	3.87261	2.45212	1.43082	9.61891	7.368	1.42438	0	5.49526	5.88484	7.5342	5.14623
ENSG00000122376	family with sequence similarity 35, member A [Source:HGNC Symbol;Acc:28773]	10	88853918	88951225	FAM35A	protein_coding	5.72764	7.14955	0.936779	0	0	2.54988	4.32968	7.23354	0	6.59858	0	0	6.65663	0	0	0	0	0	1.01083	0	2.81788	0	6.92914	0	5.07759	5.70227	0	0	8.5093	4.67554	0	0	0	0.581988	1.76433	0	1.85325	0.881272	0	0	0	0	5.32969
ENSG00000173933	RNA binding motif protein 4 [Source:HGNC Symbol;Acc:9901]	11	66384097	66434153	RBM4	protein_coding	5.87528	6.73764	8.29533	6.6779	2.857	1.07115	7.06461	8.41781	6.17743	6.29155	8.07369	7.79178	4.8483	8.5567	6.86327	0	8.13182	3.49622	1.01083	0	6.48787	4.22312	0	7.79968	0	9.19971	0.972228	5.4225	4.84949	5.12812	8.81593	0	7.10246	7.54266	7.56752	1.9497	0	0	0.667922	1.71863	3.80356	8.1562	6.95795
ENSG00000108946	protein kinase, cAMP-dependent, regulatory, type I, alpha [Source:HGNC Symbol;Acc:9388]	17	66507921	66547460	PRKAR1A	protein_coding	9.73991	9.08058	5.0008	5.70658	9.08468	5.93712	8.50482	7.92336	8.82302	7.99301	6.67323	8.46736	6.74923	8.72552	8.83951	8.58869	5.03107	8.14347	8.68204	9.63618	9.83979	6.95941	8.62136	7.99508	9.37488	8.93021	8.48781	9.3754	6.41871	7.95717	8.70334	7.77707	8.19338	9.83734	9.72553	10.3285	6.34227	7.17132	8.44209	3.07836	6.33076	5.5534	4.71288
ENSG00000198408	meningioma expressed antigen 5 (hyaluronidase) [Source:HGNC Symbol;Acc:7056]	10	103544200	103578696	MGEA5	protein_coding	8.25214	8.57583	8.67269	6.49573	5.61285	3.3982	8.30141	7.64029	0	7.54169	7.18868	7.6103	6.56909	8.48792	2.92118	6.53132	5.54712	2.11639	5.02091	4.78337	8.59345	0	7.90601	0	5.25472	9.73121	6.42157	5.06627	7.49757	7.87493	4.04655	6.19565	6.53222	3.07958	4.64222	3.3168	2.73591	0	4.71764	0	10.2319	0	4.29905
ENSG00000137145	DENN/MADD domain containing 4C [Source:HGNC Symbol;Acc:26079]	9	19230433	19374139	DENND4C	protein_coding	7.90894	3.26482	0	0	2.32041	0	6.24501	6.86824	0	3.49127	0	3.68021	4.74203	6.28591	0	4.58864	6.59151	0	8.09031	0	2.12493	3.88891	4.24686	7.57314	4.61759	7.2373	5.76096	0	1.64493	8.77763	3.21983	2.81542	7.60069	0	4.60717	0.647302	8.23815	5.09841	1.12272	0	3.1116	0	3.1438
ENSG00000125675	glutamate receptor, ionotropic, AMPA 3 [Source:HGNC Symbol;Acc:4573]	X	122318006	122624766	GRIA3	protein_coding	4.02908	7.61389	6.46632	7.83664	6.56797	5.89138	8.5967	6.01276	1.6498	7.18849	0	6.65607	7.98901	0	4.1874	0.782777	7.19741	4.50708	0	4.85475	5.19516	0	6.0855	7.05231	8.67494	7.31616	5.33963	4.57259	0	5.40571	8.34832	0.790987	4.42436	0	0	7.31974	5.79286	0	0	3.34553	4.02563	8.9107	5.03408
ENSG00000103994	zinc finger protein 106 [Source:HGNC Symbol;Acc:12886]	15	42705021	42783321	ZNF106	protein_coding	5.84735	4.14947	8.73398	7.46254	1.96206	8.96426	6.41671	2.29046	6.94588	2.07622	4.28231	4.86176	0.613872	3.57675	6.69208	2.03107	7.58617	5.09706	5.59235	4.29894	6.63029	4.25566	6.84353	0	1.28869	1.5164	2.34934	7.78885	4.11402	2.1874	1.71316	3.9082	1.41169	6.17497	3.94326	6.4446	4.45262	8.52899	6.47525	3.80705	9.22642	5.30883	7.62109
ENSG00000095777	myosin IIIA [Source:HGNC Symbol;Acc:7601]	10	26223196	26501456	MYO3A	protein_coding	5.27269	7.14235	0	1.86406	5.12743	5.40854	6.46886	0	0	6.02104	0	4.78088	0	4.86557	0	0	6.5817	3.09169	0	7.42517	8.09793	0	6.72843	2.16902	4.90628	5.58325	2.88166	6.82384	6.73686	5.61729	1.91543	7.94038	4.93405	4.201	6.64217	2.52675	0	0	3.80253	5.40062	7.6529	5.33084	6.81563
ENSG00000132388	ubiquitin-conjugating enzyme E2G 1 [Source:HGNC Symbol;Acc:12482]	17	4172554	4269923	UBE2G1	protein_coding	0.523944	8.87115	2.11659	8.38003	3.62974	1.07115	0.819105	1.75157	6.68319	7.39428	0	1.23204	0	2.73836	6.69278	0	0	0	7.80916	0	5.7019	8.11653	8.60546	7.65675	2.59485	9.92506	8.25162	8.49008	0.557475	2.03503	1.91543	0.98444	7.74737	1.32518	8.02841	9.21173	0	0	8.45792	4.0534	1.19162	9.04512	7.29885
ENSG00000205403	complement factor I [Source:HGNC Symbol;Acc:5394]	4	110661852	110723335	CFI	protein_coding	5.44442	3.22546	3.96483	8.1844	8.13936	1.72944	2.16581	1.94809	0	7.87103	9.63131	5.18084	4.22683	8.6178	1.17542	9.19009	4.3268	6.53391	2.22169	0.290991	2.6379	3.53771	2.77741	2.61088	6.57997	6.53648	2.71532	1.68913	0	8.68081	5.0365	0.268401	3.84604	3.3389	7.70576	2.536	1.6319	0	1.78139	1.81807	2.78994	1.46519	1.87105
ENSG00000153827	thyroid hormone receptor interactor 12 [Source:HGNC Symbol;Acc:12306]	2	230628554	230787955	TRIP12	protein_coding	6.10584	1.81241	0	5.88476	2.49583	1.29265	8.43525	3.09794	2.89019	2.29171	5.57668	2.45605	0.420532	0	0.433653	4.19303	0.882245	5.74212	3.4091	8.89171	7.11729	5.81592	3.37193	0	5.45245	6.29433	0.711054	2.26279	3.89548	2.69562	8.72256	0	4.98675	3.97439	2.2003	0	2.42095	0.625821	7.24243	2.21152	3.54853	0	0.552999
ENSG00000162892	interleukin 24 [Source:HGNC Symbol;Acc:11346]	1	207070788	207077484	IL24	protein_coding	0	0	0	0	0	0	0	0	0	0	0	0	0	0	0	0	0	0	0	0	0	0	0	0	0	0	0	0	0	0	0	0	0	0	0	0	0	0	0	0	0	0	0
ENSG00000102144	phosphoglycerate kinase 1 [Source:HGNC Symbol;Acc:8896]	X	77320685	77384793	PGK1	protein_coding	8.32878	6.65249	5.28508	4.07488	4.49046	7.52655	7.85395	7.04019	5.87102	6.75482	6.37304	9.45787	4.54197	8.82512	9.71379	10.4135	9.30841	3.24714	8.76456	9.49605	4.13093	11.5535	2.07829	9.10018	7.9158	4.80564	5.68636	7.14623	9.38572	4.73742	7.38927	6.64566	7.93961	7.94369	9.04576	11.2559	4.98918	9.34457	6.16226	9.63011	3.92032	0	8.57412
ENSG00000144320	KIAA1715 [Source:HGNC Symbol;Acc:21610]	2	176788620	176867567	KIAA1715	protein_coding	7.78796	1.44608	4.34715	5.66229	5.7619	0.411785	4.38735	2.42645	3.31892	5.6066	7.21706	0.856807	0	9.65452	1.14714	6.84908	5.7894	1.91361	9.76321	7.56667	1.02057	4.55957	9.31317	9.76764	7.00513	6.117	1.54151	5.39063	5.07174	2.89296	7.58085	4.53468	2.06112	4.09424	7.33819	3.08993	0	7.90596	0	6.65536	8.39819	7.5804	8.04171
ENSG00000104760	fibrinogen-like 1 [Source:HGNC Symbol;Acc:3695]	8	17721889	17767874	FGL1	protein_coding	0	0	0	8.5215	0	6.26634	0	6.38678	0	0	0	0	0	2.23827	0	0	0	0	0	6.22936	0	0	0	5.99885	0	0	0	0	0	2.55327	0	0	0	0	0	0	0	0	0	0	0	0	7.81222
ENSG00000113552	glucosamine-6-phosphate deaminase 1 [Source:HGNC Symbol;Acc:4417]	5	141371314	141392606	GNPDA1	protein_coding	7.54428	7.47627	7.34425	8.79969	4.47931	4.3281	5.80568	6.9249	1.99749	3.24672	3.61218	0	0	0	0	6.11773	0	6.60217	0	8.21938	7.49064	1.0652	0	0	5.27834	0	5.42767	8.4253	0	5.93691	7.37219	0	0.64953	7.83659	2.2003	0	0	2.38128	0	0.653344	2.48183	0	0
ENSG00000151553	family with sequence similarity 160, member B1 [Source:HGNC Symbol;Acc:29320]	10	116581503	116659591	FAM160B1	protein_coding	5.99134	0	0	4.46744	6.17471	0	0	0	0	0	9.33399	0	0	1.87024	0	0	0	0	4.99818	0	1.22942	2.27012	2.59361	0	0	0	0	3.47653	4.47418	3.25124	4.42725	7.17123	0	3.38423	5.40432	1.3716	0	0	0	0	0	2.62391	0
ENSG00000128923	family with sequence similarity 63, member B [Source:HGNC Symbol;Acc:26954]	15	59063391	59154099	FAM63B	protein_coding	3.88559	4.96874	4.25334	3.73891	1.90678	3.13441	7.3682	4.99685	6.37995	4.83841	6.36463	4.40532	3.17975	6.3091	4.95081	2.11144	4.21242	4.39917	4.05898	2.95178	7.63158	8.4917	4.04473	2.36783	5.72691	4.19919	5.26249	2.39023	4.01521	6.58981	6.08168	5.98009	5.2504	2.05498	6.58252	4.35537	2.97443	2.62327	3.19079	4.62091	6.11926	2.51864	3.78946
ENSG00000182670	tetratricopeptide repeat domain 3 [Source:HGNC Symbol;Acc:12393]	21	38445526	38575413	TTC3	protein_coding	10.4585	10.3802	9.65957	8.37163	9.41173	7.08234	10.5956	8.26853	10.0521	9.17957	9.78024	9.2902	10.0528	11.1876	8.31048	9.73933	10.7492	10.7376	7.74459	7.25034	8.69463	9.74551	4.97879	9.65166	10.4117	9.68727	6.34451	10.564	10.6609	8.73431	9.99713	7.9477	8.4337	10.2247	11.0322	10.0399	8.61877	10.6224	11.6173	10.7624	10.6827	10.9348	8.48918
ENSG00000147403	ribosomal protein L10 [Source:HGNC Symbol;Acc:10298]	X	153618315	153637504	RPL10	protein_coding	8.76274	9.32551	8.41341	9.0601	9.26354	8.91652	8.62801	8.1544	8.80862	8.77456	9.26649	8.15514	9.01186	8.52199	4.81956	8.60892	6.17494	7.73002	10.7654	9.24815	8.25191	9.87098	8.45358	9.13649	8.49896	8.93217	8.97573	6.22637	10.08	8.8278	9.04386	7.99095	6.95222	10.2299	9.89237	9.97071	8.89909	7.66662	7.64315	9.18864	9.0476	6.22609	7.96065
ENSG00000177511	ST8 alpha-N-acetyl-neuraminide alpha-2,8-sialyltransferase 3 [Source:HGNC Symbol;Acc:14269]	18	55018044	55038962	ST8SIA3	protein_coding	7.54766	8.30659	3.06017	0	2.93694	3.44757	7.52447	5.07721	8.33906	7.76685	9.20712	2.34355	0	7.11455	0	8.34197	9.81974	5.30235	0	3.54948	0	0	5.39259	3.66189	8.82882	0	7.04682	6.7121	6.97185	7.16427	6.35667	5.33749	4.85121	7.71561	6.4077	9.92413	7.72354	0	3.38136	0.653344	7.97558	9.62115	7.52447
ENSG00000129538	ribonuclease, RNase A family, 1 (pancreatic) [Source:HGNC Symbol;Acc:10044]	14	21269387	21271437	RNASE1	protein_coding	0	0	6.48793	0	1.58369	0	0	0	0	0	0	0	0	0	0	0	0	0	0	0	0	0	0	0	0	0	0	0	0	0	0	0	0	0	0	0	0	0	0	0	0	0	0
ENSG00000119547	one cut homeobox 2 [Source:HGNC Symbol;Acc:8139]	18	55102917	55158529	ONECUT2	protein_coding	8.65611	0	0	0	0	0	0	0	0	2.6993	0	6.75737	0	0	0	5.64356	0	6.92362	0	0	0	0	0	0	0	0	3.96818	0	0	0	1.07649	0	1.71133	0	0	0	0.521576	0	3.01175	0	0	0	3.08306
ENSG00000137154	ribosomal protein S6 [Source:HGNC Symbol;Acc:10429]	9	19375713	19380252	RPS6	protein_coding	10.1673	9.29641	9.665	8.8795	10.3575	9.59272	8.78293	8.9753	7.72362	8.77344	10.0003	9.21923	9.54016	7.64909	8.88033	10.2199	7.8726	9.55104	10.2837	9.58549	8.65668	9.08154	8.89865	9.81248	9.19268	9.64924	8.10281	9.04505	10.6418	9.9796	9.43546	7.88271	9.97899	10.9485	10.8643	9.92648	9.68826	10.7841	10.147	6.91549	10.7755	9.21646	9.09314
ENSG00000129625	receptor accessory protein 5 [Source:HGNC Symbol;Acc:30077]	5	112212084	112258236	REEP5	protein_coding	6.8436	8.92543	6.77841	10.0227	8.4589	7.49569	6.99536	4.84245	7.39022	6.09913	9.71963	8.31226	0	7.60647	6.02639	4.19303	8.34723	8.3971	8.51137	5.25727	1.59316	8.80501	8.28779	8.9177	7.98335	6.44241	9.45077	8.60026	8.18532	7.90822	8.64259	8.78815	8.50701	6.6422	8.95946	5.47229	0.521576	6.54224	7.88578	9.11312	7.49069	4.71724	8.51687
ENSG00000078674	pericentriolar material 1 [Source:HGNC Symbol;Acc:8727]	8	17780349	17885478	PCM1	protein_coding	6.83886	6.84037	9.6495	6.51252	4.13023	7.17653	4.44016	7.10506	6.67113	7.61661	6.99745	5.78766	8.21089	8.80994	7.78047	0.44384	3.66015	7.0556	7.0068	5.69604	8.43694	3.73111	5.54642	6.4712	7.1075	7.10005	7.96617	7.45193	8.97063	9.34471	8.68541	9.47508	9.05504	8.2082	7.91596	3.32901	6.74507	8.86213	9.34904	6.26443	5.98817	7.57384	8.11043
ENSG00000198677	tetratricopeptide repeat domain 37 [Source:HGNC Symbol;Acc:23639]	5	94799599	94890711	TTC37	protein_coding	8.90438	8.43675	3.06017	4.599	7.84985	9.16291	7.66693	5.04349	7.23917	7.92347	0.786113	8.08541	4.84704	5.29446	8.14349	9.79009	8.47816	5.89548	6.22096	6.88095	6.67986	8.12993	5.31649	2.50154	8.18112	7.01554	2.44864	7.18776	6.61024	5.10763	6.57375	3.3914	8.03036	10.6372	7.56359	6.96994	6.98716	6.18964	4.35261	8.0123	6.4107	4.87789	4.2644
ENSG00000162896	polymeric immunoglobulin receptor [Source:HGNC Symbol;Acc:8968]	1	207101863	207119811	PIGR	protein_coding	1.12294	3.0573	2.27814	0.990935	0.764751	1.42869	2.25031	3.15274	1.80084	1.99899	0.275105	3.22508	3.8919	1.41572	0	3.15608	1.9375	1.92953	2.30703	0.653215	2.14041	0.792399	1.60559	0.416997	1.72525	4.57211	0	0	1.94626	0	2.34662	0	2.25405	0	1.57418	4.05684	0	3.99241	3.35337	2.44493	0.806574	1.62348	0
ENSG00000174444	ribosomal protein L4 [Source:HGNC Symbol;Acc:10353]	15	66790355	66816870	RPL4	protein_coding	9.79906	8.66042	8.65563	8.29018	9.56005	9.47616	7.96834	8.38269	5.00671	9.31643	10.3744	8.74752	7.94513	9.75219	8.3742	9.74873	9.3839	9.21296	9.99136	9.88187	8.38165	9.3906	7.30098	8.66142	8.14599	9.45097	8.69995	9.09121	10.2878	10.0499	9.45463	8.31618	6.86616	11.2972	10.1223	8.10819	5.98783	9.8525	9.57994	9.52423	10.2668	9.69054	8.7251
ENSG00000166922	secretogranin V (7B2 protein) [Source:HGNC Symbol;Acc:10816]	15	32933877	32989299	SCG5	protein_coding	10.034	11.8506	10.9383	11.21	10.9017	11.4195	11.5013	11.2596	11.0675	11.3374	7.34471	11.3018	11.1433	10.7134	11.5554	11.3542	10.5085	10.1703	8.22852	12.0631	11.4777	6.20259	10.3205	11.3491	11.7	11.9891	11.9972	11.2285	11.8409	11.0687	10.9048	9.27332	10.7859	12.2037	11.2015	10.941	10.6736	11.5166	11.593	12.1753	10.2501	10.382	11.1969
ENSG00000173905	golgi integral membrane protein 4 [Source:HGNC Symbol;Acc:15448]	3	167726465	167813763	GOLIM4	protein_coding	6.04016	3.70849	6.83854	5.61628	3.36751	6.62397	7.5369	3.07208	5.17239	3.75364	5.92516	6.06659	3.47276	2.06596	4.35127	4.30242	5.99442	4.27756	7.58752	3.22967	6.01958	6.83378	4.89615	6.295	4.40361	3.92024	7.76962	5.82582	4.44324	4.51811	3.94633	0	3.49003	0	5.38376	7.76798	4.69068	0.506906	5.39968	3.26185	0	5.58479	6.28682
ENSG00000198380	glutamine--fructose-6-phosphate transaminase 1 [Source:HGNC Symbol;Acc:4241]	2	69546905	69614382	GFPT1	protein_coding	6.45911	4.6393	4.56373	5.67696	8.66805	5.56303	7.6582	8.61987	4.56604	4.50174	0.954663	5.7687	5.99308	4.31929	5.87091	3.02111	7.92573	4.21008	1.09551	3.29614	7.93688	7.29702	5.27849	8.34614	8.15966	8.89184	5.98772	8.7628	7.18696	5.22169	7.59441	5.7027	7.09209	3.16038	7.54732	8.07673	6.27392	9.89784	9.48352	6.44591	7.0824	5.12314	8.73115
ENSG00000152939	MARVEL domain containing 2 [Source:HGNC Symbol;Acc:26401]	5	68710939	68740157	MARVELD2	protein_coding	7.28485	7.68405	5.01129	2.90392	6.97532	9.66683	5.62779	7.90613	2.47012	7.93686	3.23372	5.88629	2.78968	9.50536	4.83673	3.09231	8.23392	5.63235	3.62745	1.42264	8.66979	3.47743	3.99222	9.55478	8.16458	4.22648	6.42404	2.20452	6.46604	7.26978	7.86439	3.37728	9.09909	3.30738	7.71636	2.13144	3.59503	7.8064	4.22215	4.49976	5.76504	9.15415	5.68038
ENSG00000171928	trans-golgi network vesicle protein 23 homolog B (S. cerevisiae) [Source:HGNC Symbol;Acc:20399]	17	18684308	18710027	TVP23B	protein_coding	9.48371	6.72664	8.72368	0	4.47931	5.74109	7.34246	5.30648	0	7.76147	2.22093	8.28271	4.34305	8.39079	8.4797	8.35736	7.20139	1.83803	7.87371	8.72329	8.66191	8.44462	9.2421	7.79771	3.52178	8.8134	1.20928	5.82679	7.66021	8.46383	7.98888	2.99265	7.03681	7.176	6.66892	7.37386	6.32482	1.05503	9.84574	5.82877	6.19527	8.9959	8.25079
ENSG00000144028	small nuclear ribonucleoprotein 200kDa (U5) [Source:HGNC Symbol;Acc:30859]	2	96940074	96971297	SNRNP200	protein_coding	6.71691	5.92464	4.54406	4.20036	4.84382	4.49942	9.11739	4.33372	7.99457	5.59278	10.7632	4.82178	3.9378	5.20525	6.75486	4.83194	6.90156	9.70551	6.77974	3.02787	7.12204	6.9668	5.78666	4.31718	3.95302	7.5507	4.18225	2.49765	4.33815	8.87891	6.22865	9.83081	6.29037	5.27651	8.05522	4.57883	0.917214	6.69608	7.53391	3.92708	5.28041	8.61215	7.51267
ENSG00000197822	occludin [Source:HGNC Symbol;Acc:8104]	5	68788119	68853931	OCLN	protein_coding	7.43101	7.22139	4.3594	1.6404	1.26991	6.12205	6.43129	4.54393	6.36566	4.90342	4.45997	7.12186	3.49361	7.5071	6.11865	5.68274	9.49218	8.66094	3.32465	4.78386	7.50849	3.25363	1.70762	8.87	7.46145	6.26747	6.8585	7.22678	3.06729	4.01352	2.6819	4.75278	3.32219	2.49853	6.20582	3.75314	5.04639	2.62917	8.16601	2.25371	3.83171	3.73067	7.45034
ENSG00000109572	chloride channel, voltage-sensitive 3 [Source:HGNC Symbol;Acc:2021]	4	170533784	170644824	CLCN3	protein_coding	5.32311	5.00199	8.61738	6.52911	7.36443	4.52494	7.94383	0	0	6.60074	9.97414	4.75933	7.38534	8.35381	6.38094	4.16433	4.45402	2.11916	5.72161	0	1.22942	6.5774	0	7.33349	7.08591	6.46106	6.53503	7.17938	9.62165	6.80457	3.59562	0	7.69247	8.25318	7.53591	3.32139	6.09871	7.09785	8.5089	0.653344	7.97558	0	0
ENSG00000122641	inhibin, beta A [Source:HGNC Symbol;Acc:6066]	7	41724712	41742706	INHBA	protein_coding	0	7.97858	0	0	0	3.62971	0	9.42334	0	5.44163	0	0	8.0146	0	0	0.44384	6.99789	0	10.3191	6.21134	0	10.4528	7.79822	9.10114	9.83023	6.41399	6.82161	0.883044	0	0	9.69584	0	7.61925	6.62777	0	0	0	0	0	4.50886	0	0	9.28899
ENSG00000133104	spastic paraplegia 20 (Troyer syndrome) [Source:HGNC Symbol;Acc:18514]	13	36875775	36944317	SPG20	protein_coding	6.74692	0	5.10294	0	7.61527	5.76075	2.53031	3.66673	3.91744	4.88134	9.34769	5.67606	0	1.64374	6.0741	0	0	0	7.20134	5.79372	4.25956	8.53874	0	6.09425	2.2573	5.66593	5.09271	0.508055	10.2708	4.97431	5.92791	0	4.21943	0	0	0.61277	0	0	7.50118	0	6.83444	1.0235	6.42657
ENSG00000107518	attractin-like 1 [Source:HGNC Symbol;Acc:29063]	10	116853124	117708503	ATRNL1	protein_coding	5.42749	0	4.82582	0	6.9792	6.46523	0	0	2.39939	0.999327	4.11266	0	0	0	0	1.95671	0	0	0	0	6.38717	0	0	5.78676	2.05339	4.65897	3.78031	0	0	2.39532	0	0	3.98049	8.73255	4.05151	0	0	3.10064	1.23884	0	5.5503	0	3.4953
ENSG00000203880	protein-L-isoaspartate (D-aspartate) O-methyltransferase domain containing 2 [Source:HGNC Symbol;Acc:15882]	20	62887094	62926855	PCMTD2	protein_coding	6.61824	6.12901	2.37968	0	8.35419	0	2.72702	7.12821	6.07208	6.90556	0	7.29213	7.02577	7.1322	0.213715	0.785795	8.39935	0.407169	0	2.71962	8.78853	7.70438	6.81394	7.76895	6.10787	7.74738	7.69583	2.12996	1.61858	7.30103	7.72582	9.52719	6.4013	5.36631	8.29199	3.07188	7.57658	0	7.96151	3.70366	9.70677	0	6.9361
ENSG00000172236	tryptase alpha/beta 1 [Source:HGNC Symbol;Acc:12019]	16	1290697	1292555	TPSAB1	protein_coding	0	0	0	0	0	0	1.2052	2.82454	0.517885	1.22574	0	0	0	2.18365	0	0	1.28188	0	0.159284	0	0	1.69092	1.08564	0	0.817616	1.23025	0	0.944459	0	0	0	0	0.628457	0	0	0	0	0	0	1.27876	1.1224	0.400735	1.31623
ENSG00000123836	6-phosphofructo-2-kinase/fructose-2,6-biphosphatase 2 [Source:HGNC Symbol;Acc:8873]	1	207222801	207254369	PFKFB2	protein_coding	10.4133	7.74338	4.03111	5.88476	1.22131	0	0	2.77608	0	6.46628	10.3466	0.493187	7.83158	11.0147	0	11.373	8.19892	8.43941	7.68325	0	3.0697	7.92794	3.03463	8.40664	0	11.704	9.01216	6.56549	9.43567	9.85807	5.88795	0	7.99221	11.1697	10.0449	4.12143	0	0	9.83451	0	10.2465	6.78089	7.29053
ENSG00000177565	transducin (beta)-like 1 X-linked receptor 1 [Source:HGNC Symbol;Acc:29529]	3	176737143	176915261	TBL1XR1	protein_coding	10.5388	0	9.26276	1.9375	9.82089	9.49189	6.70769	7.99743	9.20611	7.87214	9.97149	8.01381	7.65855	9.02376	7.19864	7.8596	0	9.33993	10.22	2.62915	8.06932	9.58377	8.71078	5.83911	7.92843	9.97932	7.26882	9.1203	9.66791	9.09381	8.72441	2.3392	9.69847	7.12041	10.8869	9.36184	4.45319	10.0113	10.6385	7.01468	6.38455	4.47074	8.30947
ENSG00000099250	neuropilin 1 [Source:HGNC Symbol;Acc:8004]	10	33466420	33625190	NRP1	protein_coding	0.523944	4.74793	6.65964	6.8725	8.76739	0	6.11831	0	0.891542	7.33624	9.17312	7.58287	5.70087	5.60902	0	0	1.85388	0	8.60836	1.04046	5.08516	9.44255	5.18	8.58255	5.83502	0	0	0	0.557475	4.31251	8.38707	1.29896	7.78092	5.84919	7.32385	0.61277	0	7.22914	0	2.32472	0	2.49768	6.56112
ENSG00000170145	salt-inducible kinase 2 [Source:HGNC Symbol;Acc:21680]	11	111473115	111601577	SIK2	protein_coding	6.62427	7.48394	6.94528	6.31022	4.28557	9.20111	7.00165	2.19416	3.33062	1.83293	2.5003	6.73783	9.249	3.68855	8.42544	2.78969	4.17009	5.8285	7.17513	3.64331	6.77779	3.13933	4.24138	7.29355	3.78248	3.65406	7.58265	5.37384	9.30289	3.24292	3.01639	3.87771	3.98827	3.65397	3.18435	2.83672	1.3234	0.629752	2.40227	2.66155	5.25638	0.620188	3.37768
ENSG00000188352	focadhesin [Source:HGNC Symbol;Acc:23377]	9	20658308	20995954	FOCAD	protein_coding	5.97134	1.44608	0	5.67039	0	1.07115	5.406	0	4.59032	6.17888	0.44595	8.88409	7.20438	2.53124	0.704243	10.3417	3.51839	3.66548	0	0	5.52508	2.91739	2.41051	0	0	1.09164	0	0	2.3582	0	0	0	2.47229	0	8.24272	0.61277	0	0	6.11378	0	0	0	0.552999
ENSG00000228696	ADP-ribosylation factor-like 17B [Source:HGNC Symbol;Acc:32387]	17	44352150	44439130	ARL17B	protein_coding	1.53189	4.96582	0.648222	0.231752	5.59049	0.706021	3.38658	9.15777	2.15121	2.74302	0.666104	2.61422	2.27013	1.88692	2.13443	1.9392	5.33711	2.49579	5.11835	1.01741	4.06291	2.18949	2.48841	5.36966	0	2.3199	2.01609	0	8.9683	2.80396	1.91118	1.99785	2.18537	0.727635	0.682828	0.953579	0	0	2.38611	1.56511	5.16221	1.60155	1.55053
ENSG00000181061	HIG1 hypoxia inducible domain family, member 1A [Source:HGNC Symbol;Acc:29527]	3	42798669	42846023	HIGD1A	protein_coding	6.74692	7.21672	6.23025	8.67849	7.64436	9.40708	6.81329	5.79698	5.6488	8.16608	6.58889	7.79372	8.52439	2.65807	7.5895	5.1962	7.38963	5.83337	7.42233	9.76064	6.00455	6.53554	5.78025	8.61722	7.5461	6.76102	7.91378	6.93751	4.16839	4.8274	8.75979	0	8.28566	0	7.07298	10.6103	7.77895	0	2.94382	5.86495	4.02563	4.46704	7.43773
ENSG00000169429	interleukin 8 [Source:HGNC Symbol;Acc:6025]	4	74606223	74609433	IL8	protein_coding	0	0	0	0	0	0	0	0	0	0	0	0	0	0	0	0	0	0	0	0	0	6.33539	0	2.83189	0	0	0	0	0	0	0	0	0	0	0	0	0	0	0	0	0	0	0
ENSG00000138207	retinol binding protein 4, plasma [Source:HGNC Symbol;Acc:9922]	10	95351444	95361501	RBP4	protein_coding	0	0	0.737545	0	0	0	0	0	0	0	8.4756	0	0	5.75806	0	0	0	9.72503	0	0	0	0	0	0	0	8.3621	0	0	6.00465	10.0089	0	9.98253	0	9.11907	0	2.06183	0	0.506906	0	0	0	0	2.37967
ENSG00000120699	exosome component 8 [Source:HGNC Symbol;Acc:17035]	13	37572953	37583750	EXOSC8	protein_coding	1.96787	5.84564	2.70757	1.55223	7.90002	1.45983	5.86166	4.84734	5.13109	6.61478	4.408	6.81004	2.1603	4.95254	1.15528	2.1978	7.04207	2.21321	5.51744	7.56496	5.69723	3.18856	3.53123	3.5214	6.95332	6.27518	4.91526	1.13398	3.6999	5.39114	6.37413	5.0719	2.14698	6.7654	7.84071	3.73433	1.45528	0	7.32887	4.74721	7.52702	1.19601	7.9709
ENSG00000136485	DDB1 and CUL4 associated factor 7 [Source:HGNC Symbol;Acc:30915]	17	61627822	61671639	DCAF7	protein_coding	8.4686	4.72898	0	8.54547	6.492	9.13304	6.84651	1.75157	3.20246	4.69191	8.94177	7.2789	3.03612	8.63993	6.66945	6.51601	7.82639	8.49272	2.52115	2.12791	3.06623	6.14507	2.056	7.57854	5.56658	5.95203	3.76552	2.6196	8.89551	3.95073	6.3695	3.60474	9.40453	9.66301	9.72815	3.94132	6.50151	5.35693	5.91245	7.68664	3.73067	6.12841	0
ENSG00000125827	thioredoxin-related transmembrane protein 4 [Source:HGNC Symbol;Acc:25237]	20	7957995	8000476	TMX4	protein_coding	8.42862	8.79094	8.34799	7.2816	9.23891	5.73513	5.72719	7.04548	1.78482	7.81874	9.35035	6.90214	7.55753	5.46377	5.17115	4.16433	8.5712	8.95159	4.00025	7.84486	8.80935	0.854733	8.58645	7.99381	5.32126	8.50755	3.67128	7.0666	8.09702	5.20584	6.08133	3.59953	8.12374	7.82794	6.25295	4.86138	7.95286	4.28655	8.8155	0.735054	6.17984	9.61868	8.37376
ENSG00000125676	THO complex 2 [Source:HGNC Symbol;Acc:19073]	X	122734412	122866906	THOC2	protein_coding	7.91785	5.4067	2.18805	0	6.93318	5.98849	6.17552	8.84198	6.26	9.00592	7.67573	7.603	7.57174	8.64012	2.18	1.05704	5.92503	4.22112	1.83517	3.8111	8.00356	10.1157	7.81385	6.36854	8.93735	9.35523	6.44602	0.883044	7.26849	5.20131	8.39519	6.90464	6.50908	9.09042	7.76523	2.53863	5.86071	1.42438	8.52174	2.05725	9.44506	5.13273	8.4796
ENSG00000172795	decapping mRNA 2 [Source:HGNC Symbol;Acc:24452]	5	112312399	112356667	DCP2	protein_coding	5.42779	0.481996	8.06667	2.0704	0	0.211417	1.59181	6.1615	0.51357	1.58407	2.41175	4.20947	0.771588	0	0	0	0	4.3065	7.58862	6.48319	9.16424	0	0	0	3.76587	8.73572	0.688421	0	8.12938	5.08245	2.77482	1.31175	0.858522	8.43951	2.35364	0	0	0.171591	1.56016	0.658589	2.83081	0	0
ENSG00000106588	proteasome (prosome, macropain) subunit, alpha type, 2 [Source:HGNC Symbol;Acc:9531]	7	42956460	42971822	PSMA2	protein_coding	3.35234	7.47436	9.01319	8.16725	8.85919	5.98606	5.64786	3.46497	8.09382	6.96745	8.4674	3.76006	4.41928	1.94778	2.66403	6.55428	8.4919	3.07604	8.10501	7.2152	5.28821	5.03978	6.82689	7.77503	8.52333	7.10266	6.25721	3.9404	6.04066	5.76832	7.02585	2.49683	8.34383	6.39213	6.96148	5.70142	5.8659	5.26673	9.33409	7.43881	3.51613	3.57246	7.25585
ENSG00000117859	oxysterol binding protein-like 9 [Source:HGNC Symbol;Acc:16386]	1	52042851	52254889	OSBPL9	protein_coding	1.46023	7.54894	6.34128	0	7.43274	0	6.79272	9.1715	5.30594	5.12798	4.30997	0	3.33513	0	0.141846	0	0	3.22667	5.97543	1.51719	7.06689	0	0	6.32153	1.53131	6.7229	5.73427	0	0	6.62937	7.45202	0	0.64953	0.955433	5.87115	4.36318	1.45528	0	8.43474	1.10139	0	2.62028	1.92706
ENSG00000053900	anaphase promoting complex subunit 4 [Source:HGNC Symbol;Acc:19990]	4	25378835	25420120	ANAPC4	protein_coding	0	0	0	3.65733	8.37169	0	3.60243	3.70907	0	0	0	0	0	1.8555	0	0	0	8.64322	2.18513	0	6.30367	1.12424	5.29021	0.906346	0	0	5.5891	0.883044	0	1.24092	0	0	4.56963	4.99134	0	0	0	5.6988	0.411121	2.86808	3.72568	0	0
ENSG00000014641	malate dehydrogenase 1, NAD (soluble) [Source:HGNC Symbol;Acc:6970]	2	63815743	63834331	MDH1	protein_coding	8.73977	5.24005	6.15117	9.53912	9.00746	9.15271	8.10369	9.28642	0	8.06894	5.61983	8.52809	5.99959	9.35277	7.50748	5.96803	8.23066	8.43244	9.15094	3.29955	7.17321	5.5278	8.73046	7.55535	4.99105	9.00663	3.84569	9.10704	9.57958	9.07653	9.14062	4.74377	7.21121	8.88327	6.72664	1.8663	0	2.43169	5.657	7.41707	2.88555	8.19551	8.26853
ENSG00000104763	N-acylsphingosine amidohydrolase (acid ceramidase) 1 [Source:HGNC Symbol;Acc:735]	8	17913934	17942494	ASAH1	protein_coding	9.63061	8.30659	8.64169	8.86976	6.4953	6.89706	7.00245	6.6334	6.0159	7.69215	7.58954	8.72805	8.17448	0.683072	7.56108	6.19069	9.59553	8.36818	10.7731	7.46373	8.90808	8.26415	0	9.29499	7.42436	8.07191	8.29647	5.69086	9.74097	5.76993	6.66328	6.59784	7.43715	7.66706	9.90398	7.64369	5.43448	7.8377	5.20616	4.35583	6.4364	3.95044	6.75453
ENSG00000198604	bromodomain adjacent to zinc finger domain, 1A [Source:HGNC Symbol;Acc:960]	14	35221937	35344853	BAZ1A	protein_coding	3.57858	7.02625	1.58593	7.71501	0	1.83562	7.26549	0	0	5.06478	3.735	3.9701	6.01443	0	0	0	0	0	8.86545	0.949474	0.741889	7.76722	0	5.40542	7.07247	1.09164	6.34451	0	5.60409	7.46692	0	0	0	0	1.48433	0	3.90079	0	0	0	0	0	1.52031
ENSG00000198682	3'-phosphoadenosine 5'-phosphosulfate synthase 2 [Source:HGNC Symbol;Acc:8604]	10	89419370	89507462	PAPSS2	protein_coding	7.18488	9.11984	8.25726	4.88339	9.30568	9.46207	8.43685	8.58778	6.35425	9.24658	7.89373	7.6244	5.83458	8.0324	8.50102	9.32928	7.20382	6.55164	6.59878	8.20123	5.16844	6.79882	6.85935	4.37971	9.07091	7.23724	9.9358	8.6602	9.71286	6.35681	3.83863	0	7.75836	7.37482	8.03502	7.66265	6.46114	0	7.14088	6.80158	6.12496	2.0351	5.94783
ENSG00000163131	cathepsin S [Source:HGNC Symbol;Acc:2545]	1	150702672	150738433	CTSS	protein_coding	3.32675	3.91887	2.82227	1.59573	1.60911	0.278437	3.41378	2.59703	2.53115	3.44834	0.711487	3.22445	2.75016	4.51499	1.08249	2.72435	2.41871	2.8387	3.17784	2.32309	2.9568	0.643967	2.5535	0	3.18147	4.42793	4.3863	2.48466	4.3144	3.95527	3.60091	1.94685	3.6984	2.43896	3.04673	4.19247	3.42469	0.929904	2.3796	4.0389	3.68682	2.07278	6.93544
ENSG00000163739	chemokine (C-X-C motif) ligand 1 (melanoma growth stimulating activity, alpha) [Source:HGNC Symbol;Acc:4602]	4	74735110	74736959	CXCL1	protein_coding	0	0	0	0	0	0	0	0	0	0	0	0	0	0	0	0	0	0	4.41288	0	0	0	0	0	0	0	0	0	0	0	0	0	0	0	0	0	0	0	0	0	0	0	0
ENSG00000086848	ALG9, alpha-1,2-mannosyltransferase [Source:HGNC Symbol;Acc:15672]	11	111652919	111742305	ALG9	protein_coding	1.93686	1.63951	1.20245	0	2.07123	0	1.79745	0.466958	5.27154	7.45608	2.71049	0	7.49071	8.79688	0	6.87911	1.16056	0	0	0.959871	5.65165	1.39983	5.53415	0	1.8338	2.6396	1.62433	0.508055	0	4.12744	6.35686	0.803114	5.2914	0.581988	2.92906	1.0378	0	0.540701	7.39395	1.10139	1.33838	0	4.85821
ENSG00000081041	chemokine (C-X-C motif) ligand 2 [Source:HGNC Symbol;Acc:4603]	4	74962752	74965010	CXCL2	protein_coding	0	0	0	0	0	0	0	0	0	0	0	0	0	0	0	0	0	0	0.592192	0	0	0	0	0	0	0	0	0	0	0	0	0	0	0	0	0	0	0	0	0	0	0	0
ENSG00000082213	chromosome 5 open reading frame 22 [Source:HGNC Symbol;Acc:25639]	5	31532373	31555165	C5orf22	protein_coding	7.11738	0	3.37054	5.66214	0	0	3.81648	7.59185	0	0.951684	0	7.05843	7.64758	0	5.23646	8.62073	1.21845	1.38146	1.33492	0	0	2.09673	0	2.22135	5.69795	8.50595	0	6.48619	0.685699	2.56815	1.05355	1.3075	5.6411	0.557841	7.65067	0.61277	3.35639	1.04034	0	0	0	0	0
ENSG00000101255	tribbles pseudokinase 3 [Source:HGNC Symbol;Acc:16228]	20	361261	378203	TRIB3	protein_coding	0	0	0	0	0	4.54776	6.94963	0	8.65283	0	0	2.37789	0.921465	0	0.351074	4.8082	8.3042	0	4.48004	8.7334	0	0	0	0	2.86821	7.55617	0	7.26909	3.6772	8.26895	7.33799	0	0	0.995536	0	0	0	0	0	0	0	5.43784	0
ENSG00000143387	cathepsin K [Source:HGNC Symbol;Acc:2536]	1	150768684	150780799	CTSK	protein_coding	0	0	0	0	0	0	0.844913	0	0	0	0	0	0	0	0	0	0	0	10.5525	0	0	0	0	0	0	7.07121	0	0	0	0	0	0	0	0	8.33726	0	0	0	0	0	0	0	0
ENSG00000112701	SUMO1/sentrin specific peptidase 6 [Source:HGNC Symbol;Acc:20944]	6	76311225	76427997	SENP6	protein_coding	5.5582	8.10364	10.0775	2.37651	5.12661	2.37412	6.91778	8.38841	3.33795	7.57068	6.86922	1.98358	8.00706	9.59021	7.25998	7.49209	2.28772	8.78001	4.11033	5.96479	3.23851	4.0503	4.61113	1.96338	5.82206	3.92455	7.49967	2.63536	5.7565	5.71882	4.52395	3.82961	7.40798	6.44237	6.07663	2.72684	3.58355	4.54852	7.50624	7.02589	6.84656	5.45493	4.85239
ENSG00000101333	phospholipase C, beta 4 [Source:HGNC Symbol;Acc:9059]	20	9049410	9461889	PLCB4	protein_coding	8.27067	8.80636	7.74963	1.03992	0	8.50049	7.18884	0	6.51126	0	5.59841	3.68021	0	9.10533	4.43718	0.782777	0	0.876649	0	4.48651	5.89471	0	4.67021	1.60408	4.31504	8.23245	2.44864	2.8742	9.00883	8.23405	0	2.77443	2.96789	5.36631	8.92429	0.61277	7.28179	0	6.66792	7.77637	9.24038	3.04087	6.8685
ENSG00000229117	ribosomal protein L41 [Source:HGNC Symbol;Acc:10354]	12	56510370	56511727	RPL41	protein_coding	10.0304	9.85218	9.72462	9.74934	10.0397	9.3914	9.26202	9.21664	9.63472	9.53049	10.2656	9.23102	9.86728	9.18912	9.91481	9.63352	8.9594	9.39137	10.2834	9.94022	9.46132	9.82701	9.99701	9.72079	9.1469	9.27421	8.86224	9.65162	10.2539	10.3716	9.94237	10.6843	9.1597	11.1499	10.2036	9.98269	9.51165	11.118	9.69185	9.74068	9.9107	9.57823	9.89223
ENSG00000144063	mal, T-cell differentiation protein-like [Source:HGNC Symbol;Acc:6818]	2	110841447	110874143	MALL	protein_coding	0.528331	2.57563	0	0	0.741959	0.41576	3.39752	0.99883	0.0544763	2.24535	0	1.39741	1.75013	3.13715	1.36621	0	1.45697	4.70412	1.2358	0.296471	2.76178	3.29837	2.36086	0	3.29975	2.80402	1.7167	0	2.71189	3.17745	2.61557	5.06531	2.89476	1.89649	1.97692	0	0.530303	0	2.55606	2.17904	2.51693	0.653725	2.76492
ENSG00000198839	zinc finger protein 277 [Source:HGNC Symbol;Acc:13070]	7	111846643	111983151	ZNF277	protein_coding	3.13728	7.26319	1.22322	0	8.46435	0	1.57649	0	5.10229	1.11697	6.11807	0.695528	0	3.06298	0	0.613082	3.22759	9.2959	5.55406	0	0.770602	0.673913	1.68843	0	0	1.79559	3.86411	7.82015	7.86592	2.19509	2.87635	1.13594	0.740725	0.533284	7.09705	3.01824	0.369383	8.78997	2.04284	6.81419	4.02563	5.36812	0.615916
ENSG00000197279	zinc finger protein 165 [Source:HGNC Symbol;Acc:12953]	6	28048753	28057341	ZNF165	protein_coding	1.46023	6.86484	0	0	0	0	0	0	0	6.05396	0	6.93605	0	2.06596	8.20142	0	7.1845	6.06722	0	6.73094	0	0	6.1007	4.25314	0	7.61146	6.65834	0	5.00592	1.14887	2.82761	0	6.35313	10.0792	6.25759	0	0	0	6.13907	0	0	6.07934	0
ENSG00000046604	desmoglein 2 [Source:HGNC Symbol;Acc:3049]	18	29078006	29128971	DSG2	protein_coding	7.75369	3.35188	1.63014	5.61783	4.84148	2.81285	6.30144	8.90559	6.60201	7.50404	2.56531	6.07647	4.58875	4.30385	8.50491	0.470339	2.76652	6.30409	9.25725	0.546886	4.68271	3.48449	8.16247	7.89914	7.16526	0	4.25769	1.80521	1.80149	4.30941	6.82885	3.89905	4.21987	1.00271	0.0921017	4.51915	2.70058	1.57264	3.3838	1.82974	5.33716	8.15005	2.34825
ENSG00000174695	transmembrane protein 167A [Source:HGNC Symbol;Acc:28330]	5	82348665	82373682	TMEM167A	protein_coding	8.90702	4.35595	7.90231	6.38158	8.38325	3.12229	5.97957	5.39057	9.58189	6.76685	6.95175	4.80211	6.76941	5.08465	2.73019	0	8.93841	7.92175	6.71486	2.91038	7.51205	7.91128	0	8.16144	7.61936	9.31449	3.56425	5.2851	3.96555	7.05624	6.50495	0	6.6675	8.01346	5.18421	8.03865	0	10.5974	6.01321	3.34553	5.50245	8.20885	6.39488
ENSG00000069122	G protein-coupled receptor 116 [Source:HGNC Symbol;Acc:19030]	6	46820249	46922680	GPR116	protein_coding	0	0	0	0	0	0	0	0	0	0	0	0	0	0	0	0	0	0	3.0189	0	0	0	0	0	0	0	0	0	0	0	0	0	0	0	0	0	0	0	0	0	0	0	0
ENSG00000075292	zinc finger protein 638 [Source:HGNC Symbol;Acc:17894]	2	71503691	71662199	ZNF638	protein_coding	8.60349	8.00142	9.02103	1.86406	8.27267	3.3982	5.10595	3.20004	8.36174	8.05123	6.99335	8.53391	4.3715	7.06962	7.44145	7.36545	7.19741	10.5533	8.27418	9.02143	7.04561	5.89353	10.2566	5.14522	8.44384	9.21503	8.14887	7.08385	8.6843	7.11444	4.14025	8.76896	8.46816	6.54574	5.61304	9.54732	6.23791	0	8.6864	7.07722	7.04948	4.17327	0.951785
ENSG00000205133	triple QxxK/R motif containing [Source:HGNC Symbol;Acc:27828]	8	93895758	94029901	TRIQK	protein_coding	6.13444	2.51162	8.13587	7.79609	0	3.02221	7.92557	2.99584	1.4498	1.4612	8.48387	7.91573	2.1749	8.55152	2.15588	9.27143	3.4553	2.95215	4.2454	0.682807	8.06222	3.41082	3.43279	0.381935	6.44625	1.33423	4.04535	1.86829	2.6772	2.38862	7.95344	5.32703	4.63151	8.15096	8.13067	2.73374	0.903844	10.8912	1.03838	2.39081	3.38927	2.24769	3.45038
ENSG00000118271	transthyretin [Source:HGNC Symbol;Acc:12405]	18	29171689	29178974	TTR	protein_coding	11.3374	15.4994	15.789	15.8633	15.6467	13.9635	15.6357	15.4754	14.8775	15.6547	10.9585	15.734	15.2276	12.562	14.89	12.2368	14.3985	9.8215	1.59939	15.4971	15.6577	1.0652	14.5309	15.949	15.4599	10.086	15.6866	15.2132	12.4746	12.4014	14.5951	11.0935	14.5443	12.5692	11.9523	15.0158	15.1531	12.1795	12.7182	15.5841	11.8499	15.523	15.0534
ENSG00000131828	pyruvate dehydrogenase (lipoamide) alpha 1 [Source:HGNC Symbol;Acc:8806]	X	19362011	19379823	PDHA1	protein_coding	8.22706	7.9303	0	3.65249	2.96551	7.37648	7.53399	0	0	5.11077	9.16462	0	6.70102	1.75236	0.771936	0	6.70433	0	8.76131	5.08986	6.42062	0	0	0	8.13981	0	7.13446	6.858	0	6.89589	6.76239	0	8.0918	5.27669	5.95577	1.01909	7.95385	0	8.44696	8.95012	0	0	3.23395
ENSG00000133110	periostin, osteoblast specific factor [Source:HGNC Symbol;Acc:16953]	13	38136720	38172981	POSTN	protein_coding	0	0	0	0	0	0	0	0	0	0	0	0	0	0	0	0	0	0	11.6728	0	0	0	0	0	0	0	0	0	0	0	0	0	0	0	0	0	0	0	0	0	0	0	0
ENSG00000261452		2	25380063	25382006	RP11-509E16.1	lincRNA	5.52675	0	0	0	0	0	0	0	0	0	0	0	0	7.55849	1.35918	7.0179	0	7.81427	6.78957	0	1.22942	0	1.28621	5.28118	0	0	0	0	0	0	0	0	3.87261	5.63509	0	0	0	6.79833	6.37227	0.653344	10.7692	4.87789	0
ENSG00000124882	epiregulin [Source:HGNC Symbol;Acc:3443]	4	75230860	75254468	EREG	protein_coding	1.19093	1.93243	0.901136	0	1.95464	0.447171	1.3062	0	0.911356	1.75821	0.930191	0.542463	0	3.28048	0.392954	1.55128	2.20013	2.63629	1.18518	0	0.853466	0.74146	2.21647	1.51568	2.17715	2.72353	3.47863	0.330558	1.57127	0.314385	2.06438	1.85954	0.996497	1.14889	2.30198	1.52273	0.329937	0	1.53986	0.840345	1.19162	0	2.37318
ENSG00000197694	spectrin, alpha, non-erythrocytic 1 [Source:HGNC Symbol;Acc:11273]	9	131314866	131395941	SPTAN1	protein_coding	5.4114	4.59022	5.28681	1.09089	3.80008	3.67436	3.97608	4.67789	0.629754	7.43903	0	1.79822	3.82355	0	6.62662	1.4522	7.8697	3.06022	4.27028	4.68235	1.00131	2.97866	4.75683	1.45869	6.60007	7.48052	6.16801	8.49487	2.37009	6.04832	4.19062	2.7433	6.87009	0	9.19748	6.78584	8.4948	0	7.41556	1.41825	7.0824	3.28818	1.89842
ENSG00000109046	WD repeat and SOCS box containing 1 [Source:HGNC Symbol;Acc:19221]	17	25621102	25640657	WSB1	protein_coding	8.51903	7.29496	8.62159	6.91674	8.10715	9.02898	8.35856	9.93495	5.24022	7.3298	9.24026	5.37158	4.63963	6.71178	4.62846	8.41384	10.5293	9.7101	3.95186	5.28337	9.46801	8.25347	6.04709	8.3138	10.3508	10.4651	8.21803	6.44673	9.36947	10.0063	9.46489	8.98952	7.97764	6.07334	6.61975	5.68148	7.41271	7.69688	10.3532	8.21818	9.23772	5.86943	7.86385
ENSG00000176597	UDP-GlcNAc:betaGal beta-1,3-N-acetylglucosaminyltransferase 5 [Source:HGNC Symbol;Acc:15684]	3	182971032	183016292	B3GNT5	protein_coding	3.75972	2.58672	0.737545	0	5.08222	5.65963	0.961569	5.07053	0	0.57487	1.06118	3.29683	0.701621	2.93254	1.33968	0	7.1022	3.25979	0	0	0.741889	0	3.33126	0	7.41943	3.00237	1.1233	5.79324	7.46065	5.30424	0.620884	3.21316	1.93378	2.97131	6.16423	1.64005	0.45438	0	3.37564	0	7.68604	0	1.52031
ENSG00000177830	chitinase domain containing 1 [Source:HGNC Symbol;Acc:28474]	11	867357	915058	CHID1	protein_coding	3.528	6.38057	6.72481	0	5.31959	7.97111	7.74278	8.53767	5.70983	6.97279	0	5.94473	2.35376	8.8401	3.47736	2.87929	3.52986	6.7715	2.19636	0.551476	6.61345	5.45672	2.07337	8.77022	4.85976	1.16988	5.91221	9.29346	3.98716	4.1138	8.22264	5.11084	5.1342	7.81456	0.688203	1.37749	7.91502	6.08393	6.00728	4.04241	2.44989	5.02244	8.68351
ENSG00000127951	fibrinogen-like 2 [Source:HGNC Symbol;Acc:3696]	7	76822688	76829143	FGL2	protein_coding	0.74359	0.737145	0	0.940223	0	0	1.74701	3.5224	0	1.18828	0	0	0	0	0	0	0.407992	0	0	0	0	0.87206	0.781936	1.72729	1.18854	0	0	0.883044	1.08905	0	0.636405	1.42594	0.740725	0	1.99872	0.759789	0	0.613965	0	2.32472	1.97077	0	1.13171
ENSG00000109846	crystallin, alpha B [Source:HGNC Symbol;Acc:2389]	11	111779289	111794446	CRYAB	protein_coding	0	0	0	0	0	0	0	0	0	0	0	0	0	0	0	0	0	0	2.92561	0	0	0	0	0	0	0	0	0	0	0	0	0	0	0	0	0	0	0	0	0	0	0	0
ENSG00000165507	chromosome 10 open reading frame 10 [Source:HGNC Symbol;Acc:23355]	10	45466429	45474258	C10orf10	protein_coding	6.80457	7.49938	8.75744	9.25107	6.04979	5.55088	8.5361	10.7864	6.94588	7.27013	6.32776	0	0	0	6.81322	1.48599	0	0	0	4.45623	10.578	0	1.95522	7.44627	2.73799	1.43121	6.25107	9.45912	0.958569	7.40608	7.93965	7.44353	0.64953	0	3.13599	9.64877	0	0	8.77632	0	0	6.60072	5.63174
ENSG00000144647	protein O-linked mannose N-acetylglucosaminyltransferase 2 (beta 1,4-) [Source:HGNC Symbol;Acc:25902]	3	43120724	43147568	POMGNT2	protein_coding	8.19077	4.09567	0	0	0	9.78384	0	0	0	0	0	6.65022	0	0	6.06062	0	0	0	0	0	0	0	0	0	8.04661	0	0	5.67902	0	1.49882	5.39333	0	0	0	0	0	0	0	0.667922	0	0	0.600669	3.71649
ENSG00000140299	BCL2/adenovirus E1B 19kDa interacting protein 2 [Source:HGNC Symbol;Acc:1083]	15	59951345	59981733	BNIP2	protein_coding	3.16149	2.87259	0.731759	2.56468	0	0.454918	7.09198	0.495174	6.27258	0.555386	1.48552	7.1006	1.69493	0.649268	6.56393	0.462817	1.25447	0	7.33188	0.578716	6.05678	6.47623	0	0	0	1.43725	0.75528	0.516594	0	4.48556	3.68292	2.94146	3.34094	0	0.682828	3.06095	0.803014	0.498332	8.04139	0.504012	5.04886	2.46297	0
ENSG00000215012	chromosome 22 open reading frame 29 [Source:HGNC Symbol;Acc:26112]	22	19833661	19842419	C22orf29	protein_coding	0	2.05325	0.720117	0	0.741959	1.59217	1.70535	7.21142	1.55431	0	0	0.709978	1.01097	0.614652	0.403237	0	1.88995	0	1.75717	0	1.74267	6.07058	0	0	2.48871	1.08396	0	1.55048	7.61152	1.97151	2.35133	0	2.7656	0.596284	0	0.817245	1.2193	0	0.689151	0.826431	1.33838	0	3.39764
ENSG00000185658	bromodomain and WD repeat domain containing 1 [Source:HGNC Symbol;Acc:12760]	21	40556102	40693485	BRWD1	protein_coding	6.73511	8.19563	0	6.04264	8.08139	8.24708	4.34615	8.15574	2.00827	4.75919	1.44195	3.01129	1.98547	3.74337	1.15933	5.46683	2.43799	6.52503	7.92537	1.51719	7.8583	6.75008	0.781936	6.06942	7.87588	2.24442	7.69858	2.76913	5.41273	5.24596	5.81878	3.78674	4.62985	5.70231	7.46428	9.56859	0.900482	7.62033	3.45292	2.80798	7.31389	0	5.02934
ENSG00000143437	aryl hydrocarbon receptor nuclear translocator [Source:HGNC Symbol;Acc:700]	1	150782181	150849244	ARNT	protein_coding	3.39259	3.17308	2.03437	4.56722	3.36751	8.55883	4.15436	5.21522	0.564513	4.72635	8.13809	1.92285	1.04668	3.97006	1.35918	5.21031	4.78718	7.14209	7.43775	7.105	7.33755	3.38465	5.69867	2.07236	5.30962	2.55743	5.23054	6.90799	4.46774	6.43937	5.17202	4.4786	4.2247	4.68795	4.15219	2.94874	3.52416	3.19187	6.60648	3.99033	8.78618	0.580881	4.12265
ENSG00000006282	spermatogenesis associated 20 [Source:HGNC Symbol;Acc:26125]	17	48620419	48633213	SPATA20	protein_coding	2.91995	0	3.70178	6.2774	0	0	0.844913	0	0	0	0	6.33771	0	0	0	7.81876	7.3146	0	0	0.551476	0	0	0	0	0	0	0	0	0	0	0	0	0	2.69288	0	2.234	1.45528	0	0	0	0	4.7998	0
ENSG00000267680	zinc finger protein 224 [Source:HGNC Symbol;Acc:13017]	19	44598492	44612479	ZNF224	protein_coding	0	0.856465	0.731759	0	0	1.37049	5.29335	0.475076	0	2.46618	0.786113	2.29166	3.10634	4.15263	0	0	0	3.09169	4.54515	3.22967	0	2.73648	1.33228	1.86293	4.32233	2.0824	0.711054	0.508055	2.31919	7.38522	1.80759	2.4494	2.48847	3.07958	1.48433	0	0	0.506906	3.38136	0.669022	2.61018	0	1.52031
ENSG00000149925	aldolase A, fructose-bisphosphate [Source:HGNC Symbol;Acc:414]	16	30064411	30081778	ALDOA	protein_coding	9.99897	9.06955	9.1107	10.6092	8.91356	8.33118	8.85291	8.61919	7.65311	9.59425	11.3177	9.47645	6.78092	11.0894	9.4866	11.2601	9.94681	9.09242	11.6487	11.0378	8.28074	11.2195	8.66403	10.211	8.11382	9.93739	7.78637	9.02803	9.48196	9.15298	9.7931	8.31552	5.12153	10.1155	10.5853	10.8554	9.30769	5.62417	9.69259	8.81663	6.8014	9.93077	9.07393
ENSG00000185339	transcobalamin II [Source:HGNC Symbol;Acc:11653]	22	31002825	31023265	TCN2	protein_coding	0	0	3.77393	0	0	0	0.844913	0	0	7.31608	0	0	8.38312	8.42466	0	0	0	0	0	0	0	0	0	0	0	0	0	4.22724	0	0.685898	0	6.35858	0	0	0	0	0	0	0	0	2.02054	0	0
ENSG00000139641	extended synaptotagmin-like protein 1 [Source:HGNC Symbol;Acc:29534]	12	56512034	56538455	ESYT1	protein_coding	9.08623	7.7239	4.2493	9.28077	2.93694	8.22061	4.21066	5.87575	6.77617	5.42495	1.2921	4.99882	6.58436	0	0	4.24876	0	2.11916	3.18912	3.85817	7.01593	0	1.65915	8.44454	7.03829	7.50319	2.75125	0	3.6772	9.63104	1.68608	0	0.64953	9.54374	9.09527	0	0.903844	0	2.35656	7.11943	1.33838	0.600669	5.39601
ENSG00000163466	actin related protein 2/3 complex, subunit 2, 34kDa [Source:HGNC Symbol;Acc:705]	2	219081817	219119079	ARPC2	protein_coding	8.39305	8.27202	7.43846	5.22717	8.79878	5.06834	8.32796	7.63701	7.41573	8.02153	8.35808	6.57	7.73285	5.78346	8.11127	7.12204	7.77501	7.97636	10.7773	7.36544	8.17989	10.5344	8.80731	8.26285	8.75813	7.11101	7.37544	5.43114	7.09159	7.52452	8.39139	5.07815	6.91782	9.71133	8.1394	8.8439	9.2993	9.29915	8.74843	8.41613	3.34654	9.98602	8.37067
ENSG00000213699	solute carrier family 35, member F6 [Source:HGNC Symbol;Acc:26055]	2	26987152	27004099	SLC35F6	protein_coding	5.08089	5.44985	2.68679	5.54399	3.50754	1.28398	7.41916	4.1564	8.31576	4.41556	1.6937	5.11806	3.48843	8.02776	3.67701	4.2452	6.30145	7.10586	6.58946	6.54944	8.29924	6.44483	3.55174	6.11344	4.34353	5.9348	5.39986	1.48018	4.88998	5.70441	6.00292	7.29473	4.02148	7.76312	9.57617	7.93268	0.647249	0	4.92422	4.80983	5.00832	2.54313	3.93976
ENSG00000101266	casein kinase 2, alpha 1 polypeptide [Source:HGNC Symbol;Acc:2457]	20	459116	524465	CSNK2A1	protein_coding	9.4644	4.68484	0	3.88064	6.55781	3.93681	6.37511	10.0796	8.69661	7.75688	4.88824	5.12212	2.9196	0	0	8.05984	9.91757	0	5.63585	8.72231	6.07818	3.11224	7.31539	5.61724	9.3332	4.37818	0	7.52517	0	8.28843	7.48364	0	7.72385	3.69219	7.20776	5.52298	6.46114	0.506906	0	5.43922	6.46164	0	0.552999
ENSG00000120708	transforming growth factor, beta-induced, 68kDa [Source:HGNC Symbol;Acc:11771]	5	135364584	135399507	TGFBI	protein_coding	6.15099	0	0	0	0	0	0	0	0	0	0	0.493187	0	0	0	0	0	0	6.23074	0	0	10.9248	0	0	0	0	0	0	0	0	0	0	0	0	0	0	0	0	0	0	0	0	0
ENSG00000169116	prostate androgen-regulated mucin-like protein 1 [Source:HGNC Symbol;Acc:24536]	4	75858305	75975325	PARM1	protein_coding	8.46017	8.30397	6.8301	10.1299	8.40891	4.27439	9.99334	7.32999	6.16949	7.33851	9.13087	9.32477	6.96874	7.38597	7.09012	7.54313	8.41877	0	1.59939	6.35776	8.15689	0	4.24686	9.68956	9.17706	6.52447	4.76112	8.01166	8.51976	8.17755	9.2163	0	8.34489	5.93372	8.13989	9.91467	6.86311	9.09327	6.13907	5.49526	5.99267	11.1191	7.1314
ENSG00000162992	neuronal differentiation 1 [Source:HGNC Symbol;Acc:7762]	2	182537815	182545603	NEUROD1	protein_coding	9.85721	8.98557	7.14779	9.4307	7.47654	8.22238	7.98969	8.1642	4.39891	5.22751	9.76856	5.98539	4.10126	6.2724	5.65726	8.65065	8.87153	5.25639	0	7.58413	10.2359	0	9.35822	0	5.57652	6.433	7.76117	5.94518	0.557475	9.53842	6.70221	5.85699	8.49208	7.64931	8.78555	9.98416	8.16779	2.69443	7.21708	3.88239	7.84738	0.600669	5.1525
ENSG00000173198	cysteinyl leukotriene receptor 1 [Source:HGNC Symbol;Acc:17451]	X	77526961	77583048	CYSLTR1	protein_coding	7.51722	7.17726	6.52395	4.32228	5.81712	4.90014	7.45161	6.3078	6.00739	6.96785	3.77601	6.59983	5.73767	7.11494	5.04985	6.01757	7.33057	7.2616	6.96175	4.41904	7.41166	6.8417	6.98969	2.89881	6.91232	7.5466	7.68475	5.21534	6.66946	6.398	7.56552	7.96963	7.05722	6.52596	6.47388	6.75174	5.63581	6.27667	7.58227	6.5419	7.93623	5.83016	6.2223
ENSG00000117335	CD46 molecule, complement regulatory protein [Source:HGNC Symbol;Acc:6953]	1	207925402	207968858	CD46	protein_coding	9.17224	8.33031	10.8112	7.67315	6.82898	8.95701	9.43358	9.13715	6.67717	9.30272	9.52629	8.21705	8.10752	9.25316	8.41893	7.6357	8.54828	5.9934	6.89195	8.73182	9.55619	2.91739	6.73829	10.1099	9.76638	8.48838	9.7021	7.24513	8.71218	8.74942	9.29821	4.37477	8.49824	6.84594	8.52234	6.11407	9.76898	9.95974	8.55018	6.62043	7.92403	10.2203	9.06573
ENSG00000138449	solute carrier family 40 (iron-regulated transporter), member 1 [Source:HGNC Symbol;Acc:10909]	2	190425305	190448484	SLC40A1	protein_coding	7.57442	8.41505	10.5948	0	2.93694	0	2.0651	5.12636	0	7.27479	0	5.51824	0	3.16476	4.21198	5.27884	0	0	4.7212	6.55638	4.49286	0	5.70266	0	0	0	6.12507	4.57259	0	1.14887	4.75805	0	4.42436	0	0.677432	3.15993	0	1.81803	1.46798	0	0	10.5304	0
ENSG00000079332	SAR1 homolog A (S. cerevisiae) [Source:HGNC Symbol;Acc:10534]	10	71907045	71930279	SAR1A	protein_coding	9.50496	7.85506	10.0019	8.95819	9.86486	8.3959	8.51113	8.85044	5.22281	8.47439	9.61889	7.82776	7.59201	8.71826	6.17131	10.0036	10.6856	8.82974	10.2552	7.44458	7.6146	9.64214	10.161	7.08675	7.99409	9.3042	10.2086	9.20219	8.86737	8.57991	7.80306	8.46047	8.70676	7.30853	9.16471	10.678	8.04945	8.6503	8.83144	9.04122	11.1837	8.82623	8.4625
ENSG00000175535	pancreatic lipase [Source:HGNC Symbol;Acc:9155]	10	118305443	118327367	PNLIP	protein_coding	0	0	0.737545	0	0	0	0	0	0	0	0	0	0	0	0	0	0	0	0	0	0	0	0	0	0	0	0	0	0	0	0	0	0	0	0	0	0	0	0	0	0	0	0
ENSG00000163743	ring finger and CHY zinc finger domain containing 1, E3 ubiquitin protein ligase [Source:HGNC Symbol;Acc:17479]	4	76404247	76439974	RCHY1	protein_coding	6.73511	2.98581	0	0	0	7.55321	2.53031	0.835021	0	4.04313	9.04147	6.15175	5.99171	0	0	6.40822	4.00311	2.86708	6.63607	0	0	0	8.88115	0	6.40618	5.08055	3.39985	0	0	1.14887	4.35091	0	5.03759	7.75268	5.54059	7.20542	8.23398	0	3.01175	0	0	0	1.26387
ENSG00000164292	Rho-related BTB domain containing 3 [Source:HGNC Symbol;Acc:18757]	5	95049226	95160087	RHOBTB3	protein_coding	7.85602	5.37448	8.53954	4.95538	8.42722	6.73988	5.30531	7.80419	6.46809	1.33832	10.7724	6.55832	5.86303	6.99624	5.63598	9.67065	3.16799	2.72653	9.13583	8.12362	8.51633	4.1672	8.34505	5.31516	7.01169	8.96264	2.40071	4.76428	1.67081	8.41114	5.36895	6.52752	5.27582	8.51512	8.54485	9.31295	5.07985	8.98267	6.54786	5.78328	7.63192	6.41291	2.43431
ENSG00000168724	DnaJ (Hsp40) homolog, subfamily C, member 21 [Source:HGNC Symbol;Acc:27030]	5	34929698	34959069	DNAJC21	protein_coding	3.68064	5.35089	4.14759	7.32273	7.75076	2.43707	1.66245	7.42213	7.19059	3.80611	0.449781	4.82158	2.34231	8.26145	0.392954	0.44384	2.26827	1.56388	6.94895	4.91988	4.16539	1.17398	5.07522	7.40707	2.73116	2.58761	9.16479	6.68868	3.30135	2.682	4.22738	1.52078	7.95417	0.661189	8.03308	2.38779	0	3.57845	1.65761	2.19897	2.77067	2.64073	4.31301
ENSG00000184939	ZFP90 zinc finger protein [Source:HGNC Symbol;Acc:23329]	16	68563993	68609975	ZFP90	protein_coding	0	5.8701	2.32309	0	0	6.01116	0	0.831864	0	1.99899	1.2921	0	0	0	0	7.49497	0	0	0	10.5581	0	0	1.28621	0.36897	0	4.97917	0	0	4.84949	6.55661	0	0	0	0	0	0	0	0	0	0	0	0	0.552999
ENSG00000169213	RAB3B, member RAS oncogene family [Source:HGNC Symbol;Acc:9778]	1	52373628	52456436	RAB3B	protein_coding	8.42425	8.27113	8.80342	10.4079	9.38566	7.99835	8.90569	8.68044	10.4454	9.65315	8.03581	9.50437	6.75545	9.08494	9.85438	9.28623	7.65404	5.11909	2.86861	10.4982	9.65452	3.24783	7.30466	9.80734	9.50298	9.3988	9.57371	9.66398	9.94934	8.03741	8.98895	6.62435	7.61984	6.6773	9.10818	11.3246	7.98536	7.5747	8.24227	9.42676	9.85359	7.31005	9.2076
ENSG00000241553	actin related protein 2/3 complex, subunit 4, 20kDa [Source:HGNC Symbol;Acc:707]	3	9834179	9849410	ARPC4	protein_coding	7.36429	6.23191	7.16802	7.17097	8.36879	7.83875	6.69633	7.41816	5.36431	7.04306	7.08473	5.96671	6.59193	5.79993	5.7028	7.44514	8.05741	6.82067	7.91327	4.18798	8.28058	4.47917	8.78795	6.84486	6.96741	7.5255	6.09849	7.60241	5.10811	7.7981	4.04655	3.28734	7.57261	5.87385	8.3319	9.85738	7.75588	7.12421	7.89651	5.12084	6.89128	9.26328	6.71016
ENSG00000117602	RCAN family member 3 [Source:HGNC Symbol;Acc:3042]	1	24829387	24867530	RCAN3	protein_coding	2.42729	1.95399	8.32187	1.86406	6.27734	7.10367	2.71657	7.291	0	4.45815	0	0	0	2.8825	5.71858	6.89229	0	5.03439	0	3.22967	4.09902	0	0	0	0	0	3.31005	3.47653	3.6772	0.685898	6.07754	6.78841	2.14141	0	5.79534	0	0	1.17824	3.74033	6.19326	6.79526	0	5.27939
ENSG00000124198	ADP-ribosylation factor guanine nucleotide-exchange factor 2 (brefeldin A-inhibited) [Source:HGNC Symbol;Acc:15853]	20	47538427	47653230	ARFGEF2	protein_coding	5.38277	1.10419	9.86821	3.39301	5.51121	8.02916	4.0114	0	0	7.51041	7.44107	3.48398	1.33074	0	0	3.72765	5.32986	6.01221	2.01622	3.22967	4.25956	2.80912	4.8247	7.20829	0	0.646696	0	4.54677	4.24216	4.76417	6.60695	0	6.39273	1.31657	8.09317	0.61277	0	1.42438	8.21794	1.44277	5.34857	7.54621	0
ENSG00000096060	FK506 binding protein 5 [Source:HGNC Symbol;Acc:3721]	6	35541362	35696360	FKBP5	protein_coding	1.35055	2.20307	2.63967	1.20433	3.7581	5.71199	3.04909	1.151	2.10894	3.03796	8.75257	4.76712	7.61014	1.32381	6.1993	5.6033	3.33803	2.6651	2.13433	2.13404	4.38742	2.56465	3.99222	3.31763	6.66234	5.44136	3.48767	0	3.4007	6.63097	3.39505	4.94289	2.71652	1.09621	1.22799	7.87309	0	0.280612	5.46825	1.24429	2.47391	2.48043	7.60474
ENSG00000187021	pancreatic lipase-related protein 1 [Source:HGNC Symbol;Acc:9156]	10	118349897	118368687	PNLIPRP1	protein_coding	0.523944	0	0	0	0.659226	0	0	0	0	0	0.426641	0.827287	0	1.65108	0	0	0.0187389	1.14012	0.592192	0	0	0	0.829437	0	0.727149	0.0716282	0	0	1.46928	0	0	0	0.459761	0	0	0.799808	0	0	1.10703	0.658589	0	0	0
ENSG00000171862	phosphatase and tensin homolog [Source:HGNC Symbol;Acc:9588]	10	89622870	89731687	PTEN	protein_coding	11.1788	10.3503	11.0678	7.40921	9.01026	9.3178	10.1154	9.23543	8.4295	9.35401	9.4969	7.57064	9.06175	5.10705	6.88758	10.6648	9.88503	6.31459	10.215	9.7521	9.93162	10.3872	8.76189	6.49325	8.26034	10.3538	9.96184	9.63869	10.6225	9.35747	8.66247	6.89856	9.96187	10.0318	10.6104	9.95753	6.64189	10.5485	10.54	9.59567	8.98582	8.14974	8.23089
ENSG00000091527	CDV3 homolog (mouse) [Source:HGNC Symbol;Acc:26928]	3	133292574	133309105	CDV3	protein_coding	9.04137	4.68484	9.81576	0	4.56296	8.55078	0	0.475076	8.84081	4.12801	8.15285	5.84924	8.12574	1.04431	0	8.58328	9.67728	8.30856	8.483	5.94312	9.17465	9.01303	8.68327	9.12919	8.82882	7.74677	9.09515	8.821	9.25701	6.74031	7.00589	0	5.20263	10.3914	8.71185	2.38779	0	0	8.83516	0	9.91299	8.82294	3.95244
ENSG00000119335	SET nuclear oncogene [Source:HGNC Symbol;Acc:10760]	9	131445703	131458679	SET	protein_coding	10.3833	8.01431	9.23586	7.91133	10.0274	8.81744	8.95943	8.22001	7.61453	7.77015	9.66145	8.02349	9.34891	6.36233	9.95359	10.489	7.54919	5.30235	9.68975	7.04253	8.58841	9.22276	10.1862	8.05796	7.2016	7.75813	9.28978	10.3812	7.96609	8.0207	8.4037	7.0572	7.91952	9.05042	8.25188	9.5945	3.34283	9.36603	10.1205	6.49759	9.98657	10.0731	8.5424
ENSG00000116044	nuclear factor, erythroid 2-like 2 [Source:HGNC Symbol;Acc:7782]	2	178092323	178257425	NFE2L2	protein_coding	6.81583	3.57567	0	0	4.24612	1.07115	6.58109	0	0	4.92944	3.10542	5.49235	0	7.15275	0.95549	9.45856	3.81491	0	8.68509	8.12147	0	5.72498	0	7.42441	3.69744	4.0242	8.61413	1.69102	9.90042	7.92276	6.43762	2.77443	8.66492	4.51501	5.71532	8.20052	0	6.70245	6.15107	5.38211	6.43665	8.07434	5.36364
ENSG00000132475	H3 histone, family 3B (H3.3B) [Source:HGNC Symbol;Acc:4765]	17	73772515	73781974	H3F3B	protein_coding	9.9875	10.4048	11.0004	11.339	10.0756	8.86045	8.6728	10.5475	10.1173	8.32059	9.92912	11.1501	9.47304	8.04374	10.0421	11.389	9.36733	10.4916	9.42649	11.7548	10.1156	9.84386	10.7942	10.6548	9.70184	9.51387	10.4801	10.4799	10.4721	10.034	9.92279	9.32352	8.95672	10.8265	10.3517	10.5066	9.28882	11.4825	8.42699	10.2611	10.123	10.7772	9.21268
ENSG00000197701	zinc finger protein 595 [Source:HGNC Symbol;Acc:27196]	4	53179	88099	ZNF595	protein_coding	3.3956	1.8335	1.51021	2.17701	0	2.28783	0.996531	0.587931	0	2.16245	0	0.282145	0	0.908014	0	0.485266	1.20214	3.72325	2.02164	0.551476	0	0.708081	2.56758	1.92514	0.705012	2.50521	3.2744	0.512331	0.557475	1.22598	1.1028	2.68388	4.70412	3.14344	0.806623	0	0	0.224534	0	2.89499	0	2.87508	2.23829
ENSG00000038427	versican [Source:HGNC Symbol;Acc:2464]	5	82767284	82878122	VCAN	protein_coding	0	0	0	0	0	0	0	0	0	0	0	0	0	5.01525	0	0	0	0	6.32509	0	0	7.02743	0	0	0	0	0	0	0	0	0	0	0	0	0	0	0	0	0	0	0	0	0.552999
ENSG00000039068	cadherin 1, type 1, E-cadherin (epithelial) [Source:HGNC Symbol;Acc:1748]	16	68771128	68869451	CDH1	protein_coding	7.17556	9.24331	5.91631	8.48887	2.5295	1.99554	8.43509	8.78817	8.25271	8.48251	1.21766	8.3298	9.09835	7.67377	8.34707	6.19666	9.26267	5.22673	1.54019	6.60639	6.24388	2.60924	0.817707	8.72943	9.302	7.99295	9.3101	3.11113	8.30535	6.32649	7.52388	6.74438	7.2467	8.84072	8.00861	6.00049	4.23698	3.16435	6.27119	2.48534	7.58112	7.38654	7.92055
ENSG00000129757	cyclin-dependent kinase inhibitor 1C (p57, Kip2) [Source:HGNC Symbol;Acc:1786]	11	2904443	2907111	CDKN1C	protein_coding	7.95144	6.16414	7.22705	5.007	6.28968	2.78084	5.10595	6.45891	1.19076	0	7.55383	5.29682	0	7.15275	0	8.1758	7.49271	6.96282	2.01622	0	5.52508	0	5.81754	0	5.05042	7.76564	2.60786	6.26648	2.8343	4.31251	1.07649	0	0	9.84204	8.67637	2.52675	0	6.39123	10.4093	0	9.98004	0	5.50391
ENSG00000187626	zinc finger with KRAB and SCAN domains 4 [Source:HGNC Symbol;Acc:13854]	6	28212401	28227011	ZKSCAN4	protein_coding	0	0	0	0	0	0	0	0	0	0	0	0	0	0	0	0	0	0	0	0	0	0	0	0	0	0	0	0	0	0	0	0	0	0	0	0	0	0	0	0	0	0	0
ENSG00000132639	synaptosomal-associated protein, 25kDa [Source:HGNC Symbol;Acc:11132]	20	10199478	10288066	SNAP25	protein_coding	5.96124	4.23432	9.09156	5.74969	6.75745	5.29173	7.75464	9.69786	5.54692	6.58363	7.98974	9.80601	9.31841	9.28805	8.85909	7.95065	2.29926	6.04911	0	8.88743	8.22006	0	8.20579	9.21093	8.7166	8.28048	8.67932	9.39725	7.37584	4.76417	8.67427	0	6.95883	2.99218	9.62838	9.77613	7.29386	8.41967	5.03537	5.98724	6.87258	8.26805	4.76338
ENSG00000107201	DEAD (Asp-Glu-Ala-Asp) box polypeptide 58 [Source:HGNC Symbol;Acc:19102]	9	32455300	32526322	DDX58	protein_coding	0	0	0	0	0.736204	0	0	1.56069	0	4.64256	0	0.493187	7.75018	0	3.08982	0	0	5.70051	0.29677	0	3.55555	4.73731	0	0	3.29605	0.855015	0	4.74147	0	2.82518	2.5879	0	5.2891	0	0.677432	0	6.83036	0	0	5.04777	0	0	2.61788
ENSG00000206053	hematological and neurological expressed 1-like [Source:HGNC Symbol;Acc:14137]	16	1728257	1752281	HN1L	protein_coding	0	7.63949	4.64525	4.74819	1.22131	9.06843	3.16375	5.02633	0	8.22748	0	0.86005	8.64033	0	6.96555	5.49015	0	0	3.34136	9.92719	0.741889	0	5.48818	6.75429	6.57779	7.23724	6.90832	5.55497	0	7.28726	8.19299	0	6.04061	0	0	5.57195	6.99703	0	7.29547	0	5.99267	8.36162	7.14575
ENSG00000182718	annexin A2 [Source:HGNC Symbol;Acc:537]	15	60639333	60695082	ANXA2	protein_coding	10.2605	8.48722	6.16466	8.85996	8.08025	9.71242	7.0798	6.0725	8.23643	9.10931	10.1199	8.01896	7.79654	9.16832	6.70048	9.78597	9.41942	6.97294	10.0179	9.89299	6.4328	10.4651	10.0234	10.2437	10.2283	9.50846	0	0	9.35379	9.71499	6.69165	0	6.84918	9.08222	8.88094	4.7395	8.4773	0	6.44232	7.52591	3.72568	9.07028	8.26853
ENSG00000107951	mitochondrial poly(A) polymerase [Source:HGNC Symbol;Acc:25532]	10	30598730	30663377	MTPAP	protein_coding	9.14432	8.13658	7.60437	2.64726	8.79343	2.24826	5.18512	5.29836	8.8407	2.83173	10.2876	7.82281	3.02899	2.50583	1.95502	6.97493	8.71103	3.46379	7.8949	4.18798	8.37737	8.26196	2.63764	8.42339	7.85879	3.35077	1.23293	0	7.77554	7.89123	6.8999	3.23123	7.35755	3.3572	5.22384	7.15574	5.5741	10.1059	6.4539	2.86581	2.92384	3.09506	8.96041
ENSG00000137261	KIAA0319 [Source:HGNC Symbol;Acc:21580]	6	24544332	24646383	KIAA0319	protein_coding	1.85889	8.93563	1.58593	0	3.16823	3.18186	1.37424	5.84671	2.27745	0	0	0	1.00735	0	0	0	3.24759	0	0	3.42992	4.93471	0	8.11885	0	0	7.65259	0	0	0	2.94406	4.38958	0	3.756	0	1.99872	0	0	5.61453	0	0	0	0	1.92706
ENSG00000148498	par-3 family cell polarity regulator [Source:HGNC Symbol;Acc:16051]	10	34398488	35104253	PARD3	protein_coding	0	0	0	0	2.66136	2.52893	0.844913	0	0	0	0	0	0	6.30533	0	0	0	0.876649	1.8228	0.949474	0	0	0	0	0	0	0	0	4.47418	2.69562	5.05129	6.27942	0	0	6.15212	0	0	0.506906	0	0	0	0	0
ENSG00000188321	zinc finger protein 559 [Source:HGNC Symbol;Acc:28197]	19	9434448	9461838	ZNF559	protein_coding	0	0	0.737545	0	0	0	5.43284	0	0.460763	0	9.57434	0	0	0	5.47378	0	0	0	0	8.61847	0	0	0	0.35917	0	0	8.2368	0	8.41201	7.63979	0.636405	0.790987	0	5.20075	5.25384	0	0	0	0.667922	0.653344	0	0	0.552999
ENSG00000138381	asparagine synthetase domain containing 1 [Source:HGNC Symbol;Acc:24910]	2	190526111	190535557	ASNSD1	protein_coding	8.07372	7.91471	3.17121	0	0.736204	7.27414	6.86348	0	8.614	7.01547	0	0	3.96791	4.72776	6.87993	2.20232	0	3.75932	3.54328	1.92353	0	3.97712	6.65824	0	7.2139	8.64289	3.21428	0	4.3462	3.42482	8.55385	3.17518	4.30493	0	1.99872	0.61277	3.46166	1.42438	8.84073	0	4.83371	1.0235	0.552999
ENSG00000158985	CDC42 small effector 2 [Source:HGNC Symbol;Acc:18547]	5	130581186	130734140	CDC42SE2	protein_coding	9.68958	8.45986	6.77332	8.75766	9.32251	7.70785	4.44016	3.85891	5.16604	8.88197	8.78864	6.38926	9.46048	7.4011	8.12783	6.78677	7.77587	8.92645	3.2558	8.25332	6.2022	6.16739	8.52795	7.64573	6.61759	8.04024	8.56076	6.43355	7.19766	8.09176	7.61095	5.32335	7.80217	0	8.01814	9.13457	7.84578	8.44254	8.07686	8.64677	8.51221	2.91416	5.68981
ENSG00000197579	topoisomerase I binding, arginine/serine-rich, E3 ubiquitin protein ligase [Source:HGNC Symbol;Acc:21653]	9	32540542	32552551	TOPORS	protein_coding	8.09236	0	2.11659	0	4.08567	6.687	5.99766	0	0	0	2.68553	0	0	8.9231	4.39486	0	0	9.56862	6.87938	0	0	5.88021	8.61344	2.42531	1.81583	0	1.18523	3.63198	0	7.17038	0	3.05356	5.15737	0	0	7.14196	0	7.06647	0	9.04277	2.83081	0	6.16907
ENSG00000145725	diphosphoinositol pentakisphosphate kinase 2 [Source:HGNC Symbol;Acc:29035]	5	102455853	102548500	PPIP5K2	protein_coding	5.25625	3.99523	5.65486	6.07758	3.54258	1.07115	6.05061	2.85596	0	6.07549	0	8.23926	6.17432	0	2.7967	0.782777	5.25775	0	7.14555	7.17393	5.73997	8.31452	6.9206	6.90924	7.50665	6.3554	0.711054	7.73696	0.958569	3.15593	6.19138	0.790987	3.33607	0	5.36291	2.06183	0	8.36729	8.49012	5.90688	2.02054	0.600669	7.60629
ENSG00000150907	forkhead box O1 [Source:HGNC Symbol;Acc:3819]	13	41129804	41240734	FOXO1	protein_coding	9.11955	7.89742	0.737545	7.29743	0	7.00406	5.03766	7.46668	4.03499	7.45399	1.96262	0	0	3.88859	0	0	4.11619	2.3731	1.59939	5.96479	7.11022	0	6.00698	7.51224	8.13011	8.9555	9.31019	0	0.958569	8.13132	0	0.790987	7.91273	1.31657	6.77441	2.6535	5.37516	0	1.46798	2.48091	5.40171	5.43784	1.26387
ENSG00000129083	coatomer protein complex, subunit beta 1 [Source:HGNC Symbol;Acc:2231]	11	14464986	14521573	COPB1	protein_coding	6.47596	8.03343	4.03111	10.2221	7.94257	4.79668	5.56001	8.24619	8.24052	9.59111	8.94934	8.97821	2.9196	6.35298	9.73886	9.96198	9.03506	6.78829	7.0044	6.80489	0.741889	9.9332	5.29021	7.38218	8.09063	7.20442	6.34451	6.14265	8.46111	4.858	8.44789	5.55478	9.36026	8.89194	6.93141	3.98344	1.66794	0	8.73704	8.12907	8.50501	8.818	7.83896
ENSG00000196586	myosin VI [Source:HGNC Symbol;Acc:7605]	6	76458909	76629254	MYO6	protein_coding	7.74205	4.12923	6.84667	6.4411	2.95935	3.3982	7.94397	6.18697	0	4.82016	0	6.52346	2.1749	0	9.02561	4.0979	8.06708	4.8248	5.82997	9.16903	7.30455	4.62267	5.07245	5.14177	5.30273	9.40488	7.34003	6.27987	7.23133	6.10798	6.31578	6.33215	5.90862	3.16358	7.33444	5.7671	2.16484	7.63556	5.54375	2.82674	7.06604	6.16469	9.36368
ENSG00000118985	elongation factor, RNA polymerase II, 2 [Source:HGNC Symbol;Acc:17064]	5	95220802	95297775	ELL2	protein_coding	8.01876	11.392	7.80234	9.54627	7.95005	9.52964	9.63005	8.9448	9.05774	10.2377	8.94722	10.07	9.80906	7.43107	7.82682	7.99002	9.00233	10.0492	1.33492	9.06346	8.8525	0	9.36947	9.78844	10.2092	8.98948	8.99053	9.62487	7.04581	7.53479	9.64379	4.21149	9.5039	10.1741	7.73572	5.03349	10.5026	8.29951	1.46798	10.4889	7.37589	10.864	9.20356
ENSG00000177189	ribosomal protein S6 kinase, 90kDa, polypeptide 3 [Source:HGNC Symbol;Acc:10432]	X	20168029	20285523	RPS6KA3	protein_coding	5.62948	7.81054	8.44626	7.22335	6.15395	9.22381	4.35348	6.63136	7.04619	7.55271	6.32529	7.76219	7.62594	6.14705	4.11235	1.88817	6.1269	3.76997	3.04929	7.26535	6.27151	5.1482	3.63262	2.27793	7.34723	7.99711	3.58585	6.16498	6.07265	8.57798	9.2727	5.70674	4.36628	7.41888	6.29286	3.3381	7.28204	2.03808	3.49797	7.56042	4.06306	6.09141	8.19167
ENSG00000143418	ceramide synthase 2 [Source:HGNC Symbol;Acc:14076]	1	150933059	150947479	CERS2	protein_coding	6.16866	7.3835	0	0	1.01339	7.33116	4.01354	5.94469	0	0	5.62025	0.720721	0	0	0	5.44314	7.11136	0	0	0	3.20102	0	5.86497	0	7.97463	0	1.56344	8.2513	6.14261	5.92251	6.15525	0	5.52117	2.45212	5.89924	5.01991	0	6.19753	6.23782	0	3.813	0	0
ENSG00000150625	glycoprotein M6A [Source:HGNC Symbol;Acc:4460]	4	176554085	176923815	GPM6A	protein_coding	4.43165	0	0	0	0	0	0	0	0	0	8.95461	0	0	6.58621	0	8.48082	0	0	0	0	0	0	0.781936	0	0	8.8985	1.18523	1.1804	7.5384	4.76417	0	0.790987	0	0.581988	1.99872	1.04151	0	0	5.08627	0	5.29341	0	0
ENSG00000196975	annexin A4 [Source:HGNC Symbol;Acc:542]	2	69871557	70053596	ANXA4	protein_coding	2.37222	6.45789	8.04106	6.07758	5.25239	4.76975	5.00333	3.54137	1.2386	2.31796	0	5.59481	2.2303	2.45782	1.12246	0	6.00914	2.39849	2.9023	4.35188	6.56171	3.59557	3.62339	8.94115	5.85306	2.17746	4.23591	1.15874	6.00136	3.46036	7.79739	3.56879	2.85902	0.615128	1.11278	6.86852	6.98334	5.1023	8.34582	7.34986	4.41491	0	1.34039
ENSG00000267508	zinc finger protein 285 [Source:HGNC Symbol;Acc:13079]	19	44886459	44905774	ZNF285	protein_coding	2.98443	0	1.32664	0	0.736204	1.68402	5.67688	0	2.40172	0.479884	0	7.95182	1.20362	0	0	0	0	0	0	0.556052	1.14859	2.48805	1.76677	0.667838	0	0.42153	1.19329	0.822346	1.84949	0	0.691928	0	1.08036	2.52741	1.06399	0	0	0	0	0	0	0	0.552999
ENSG00000134748	pre-mRNA processing factor 38A [Source:HGNC Symbol;Acc:25930]	1	52870236	52886511	PRPF38A	protein_coding	0	0	0	0	0	4.27439	6.36121	5.30776	0	1.58407	8.20336	3.37485	0	0	5.74409	7.77672	7.86453	0	7.57221	0	0	3.92619	0	6.05684	7.89827	3.15674	0	0	0	7.79019	5.95395	7.36262	0	0	7.03393	0	0	0	0	0	0	6.40361	0
ENSG00000123689	G0/G1switch 2 [Source:HGNC Symbol;Acc:30229]	1	209848765	209849733	G0S2	protein_coding	0	0	0	0	0	0	0	0	0	0	0	0	0	0	0	4.52189	0	0	7.46854	0	0	0	0	5.60001	0	0	0	0	0	0	0	0	0	0	0	0	0	0	0	0	0	3.04087	0
ENSG00000129084	proteasome (prosome, macropain) subunit, alpha type, 1 [Source:HGNC Symbol;Acc:9530]	11	14515329	14665181	PSMA1	protein_coding	7.20215	7.71997	8.82056	9.09265	2.32041	7.67998	7.88669	5.93212	6.89496	4.75359	7.15241	4.69268	5.24309	0.614652	0	6.23966	6.74885	6.53872	2.18674	8.01124	8.69524	8.20929	7.12775	4.39977	7.65385	3.15674	4.98075	3.10406	7.99038	6.39904	8.69178	2.6116	5.26796	8.67232	8.50133	6.33821	4.50945	0	8.65302	5.74681	7.57407	7.52209	6.87426
ENSG00000198087	CD2-associated protein [Source:HGNC Symbol;Acc:14258]	6	47445525	47594999	CD2AP	protein_coding	3.28653	5.44433	7.12728	0	5.96006	3.58629	6.08485	5.92288	3.74414	2.45833	8.03228	7.40706	5.05861	0	0	4.49909	5.15562	0	0	0.551476	6.30367	0	5.87172	6.9438	7.09923	5.83241	2.60786	8.1807	8.22225	2.69427	4.60211	6.07582	0	4.23946	6.43833	5.84859	0	1.81803	0	6.62026	5.45296	7.66843	1.26387
ENSG00000114982	KAT8 regulatory NSL complex subunit 3 [Source:HGNC Symbol;Acc:25473]	2	97258907	97308524	KANSL3	protein_coding	3.59121	5.07885	1.72056	1.4885	2.6929	2.99789	5.06021	4.47628	9.50727	3.92522	6.43257	3.6388	3.61575	6.36009	2.9819	7.35371	4.8216	4.19764	5.68022	1.47674	4.16594	10.2677	5.53929	2.71188	2.85821	8.80226	2.69559	2.99217	4.13586	3.8827	2.37465	4.01111	3.46053	2.11909	4.66829	1.82164	1.32591	1.09538	7.09403	4.76068	2.86148	3.70919	8.91338
ENSG00000188629	zinc finger protein 177 [Source:HGNC Symbol;Acc:12966]	19	9435021	9493293	ZNF177	protein_coding	0	0	0	0	0.736204	0	0	0	0	0	0	8.18777	1.00735	0	2.67821	0	0	0	2.82587	0	0	2.69205	0	0	1.79764	0	0	4.01763	0	2.55327	5.07522	2.42802	0	0	2.67663	0	0	0	0	0	8.88699	0	0.552999
ENSG00000091409	integrin, alpha 6 [Source:HGNC Symbol;Acc:6142]	2	173292082	173371181	ITGA6	protein_coding	0	0	0	7.81988	0	0	0	0	0	0	0	0	0	0	0	0	0	3.92731	0	0	0	0	0	0	0	0	0	0	1.52945	0	0	5.53219	0	0	0	0	0	0	0	0	0	0	0
ENSG00000204983	protease, serine, 1 (trypsin 1) [Source:HGNC Symbol;Acc:9475]	7	142457319	142460923	PRSS1	protein_coding	0	0	0	0	0	0	0	0	0	0	0	0	0	0	0	4.35416	0	0	0	0	0	0	0	0	0	0	0	0	0	0	0	0	0	0	0	0	0	0	0	0	0	0	0
ENSG00000159459	ubiquitin protein ligase E3 component n-recognin 1 [Source:HGNC Symbol;Acc:16808]	15	43235095	43398311	UBR1	protein_coding	8.42935	9.2024	8.01855	0	0	3.34708	6.11831	0.920736	0	7.87318	5.48631	5.01782	0	0	0.701468	1.48599	6.34177	9.55451	5.66501	0	4.45974	5.97095	7.81284	0	0.78633	1.7059	0	3.90017	0.557475	5.38485	7.43363	1.29896	0	1.57901	6.70127	1.04151	1.75615	0	1.12272	0.653344	3.54853	2.8474	0
ENSG00000182240	beta-site APP-cleaving enzyme 2 [Source:HGNC Symbol;Acc:934]	21	42539728	42654445	BACE2	protein_coding	6.97996	3.26654	6.20437	6.34456	0	1.67907	3.93836	0	1.19076	0	0	6.62662	0	0	0	0	8.33948	0	0	2.61387	0	0	0	0	6.02848	0	0	0	0	1.49882	1.07649	0	0	0	0	0	0	0	0	0	0	0	0
ENSG00000107949	BRCA2 and CDKN1A interacting protein [Source:HGNC Symbol;Acc:978]	10	127512115	127542264	BCCIP	protein_coding	0	4.80897	7.88811	7.77189	8.9137	0.451049	1.37424	0	5.27154	7.17359	7.28229	2.09099	2.01101	9.67415	0	2.08474	7.0195	4.91952	7.60568	2.0937	5.87832	6.77022	8.37165	2.64288	5.02272	7.61146	1.18523	5.65505	3.3832	0.685898	7.74831	0	4.46802	2.27534	0	2.52675	6.74407	9.42376	0	6.57764	0	7.9044	0
ENSG00000124214	staufen double-stranded RNA binding protein 1 [Source:HGNC Symbol;Acc:11370]	20	47729878	47804904	STAU1	protein_coding	8.34873	6.42767	4.16218	5.99708	7.70252	4.94329	3.83189	1.14592	1.22019	3.46017	0.449781	6.80836	4.17654	3.82944	0	1.93377	7.4852	2.58896	3.84789	0.596594	1.95521	8.20534	2.18257	1.65303	2.87814	4.96826	7.37123	0	5.18026	3.61314	5.49047	3.99137	4.10299	6.12428	2.48917	1.21926	6.10785	10.4785	2.46976	8.29657	7.84652	3.2813	7.19418
ENSG00000132640	BTB (POZ) domain containing 3 [Source:HGNC Symbol;Acc:15854]	20	11871371	11907257	BTBD3	protein_coding	4.62326	6.23191	0	6.05484	5.42441	9.82461	7.91075	2.1731	2.39939	1.99899	4.70003	5.10514	0	7.1961	0	5.64523	0	0.876649	0	0	5.94281	0	9.12929	8.22324	6.65198	6.02038	3.00126	4.93306	7.45554	7.66597	1.07649	3.89481	0	5.46699	6.79791	4.28701	5.50536	0	6.49035	8.80632	6.73442	4.25359	1.26387
ENSG00000067066	SP100 nuclear antigen [Source:HGNC Symbol;Acc:11206]	2	231280657	231408805	SP100	protein_coding	4.20688	3.31735	3.25327	3.31018	4.02678	8.1463	2.69722	4.15671	2.54707	4.84042	5.72513	3.09212	2.72943	5.29582	2.35441	3.86915	3.44927	2.95526	7.77276	7.11089	2.37166	3.51238	2.68682	2.63748	7.72459	5.24191	2.26581	8.49748	4.02277	6.16502	4.36145	4.0466	3.43041	3.13856	4.05307	3.9203	6.31806	2.73331	4.57346	3.6973	4.96731	2.57349	3.32956
ENSG00000120696	kelch repeat and BTB (POZ) domain containing 7 [Source:HGNC Symbol;Acc:25266]	13	41763969	41768702	KBTBD7	protein_coding	4.37188	0	0	0	4.02796	2.85591	3.93611	7.36454	0	6.44988	0	0	0	0	0	0	0	0	0	0	0	0	0	0	0	2.77331	0	9.14824	0	2.01561	0	1.96854	2.31632	0	8.93428	4.36318	1.66794	0	5.8897	0	0	0	0
ENSG00000183054	RANBP2-like and GRIP domain containing 6 [Source:HGNC Symbol;Acc:32419]	2	111271389	111334762	RGPD6	protein_coding	8.73789	4.56766	4.86203	7.74434	2.12065	7.94318	7.52721	5.75863	3.35192	8.32991	5.78455	3.11876	5.45975	8.64281	6.87432	1.29801	4.59687	8.24862	9.45263	2.76381	5.07944	5.80172	6.32013	4.5586	8.50248	9.33903	7.17642	3.03812	6.2075	7.74457	7.84542	5.25961	8.23988	7.74261	8.65443	0	7.91845	1.5665	8.9194	8.2209	9.94357	0.325439	2.85244
ENSG00000175426	proprotein convertase subtilisin/kexin type 1 [Source:HGNC Symbol;Acc:8743]	5	95726119	95769847	PCSK1	protein_coding	7.93862	0	0	0.611701	5.42441	7.52186	0.844913	6.32496	0	0	10.1637	1.39517	6.25287	7.54625	0	10.0967	2.09369	11.0627	0	3.54948	0	0	0	1.73615	2.59485	9.00715	0	0	9.89828	7.43174	5.81878	5.64176	6.87743	9.98683	9.76482	3.71934	7.6378	9.62408	7.7621	0	7.20705	8.39962	7.59239
ENSG00000134744	zinc finger, CCHC domain containing 11 [Source:HGNC Symbol;Acc:28981]	1	52873954	53019159	ZCCHC11	protein_coding	7.6994	6.17909	5.65562	4.66054	3.1693	3.6463	4.28737	4.33344	9.40389	5.44329	6.8192	3.14226	5.95094	6.4699	4.71768	1.08671	6.94146	4.9448	3.53003	3.64868	7.95931	1.6958	3.79547	7.82008	4.37717	9.15956	1.33845	6.59603	2.91682	5.65106	6.20163	3.08121	6.31376	1.00628	6.27142	3.3014	0	4.23877	3.78907	2.97705	5.67122	7.15428	5.30348
ENSG00000006125	adaptor-related protein complex 2, beta 1 subunit [Source:HGNC Symbol;Acc:563]	17	33905065	34053436	AP2B1	protein_coding	6.30274	4.92217	7.29606	3.98054	8.54628	0	6.30421	3.52729	0	5.24662	5.82732	0	9.33994	3.7812	0.392954	1.81621	7.97735	6.37397	3.10652	8.0996	0.741889	8.68568	1.65915	6.85941	0	7.8316	5.26989	0	3.31645	6.86609	1.07649	0.790987	0	1.9933	4.95254	7.84968	0	6.9583	0.667922	0.653344	1.33838	9.4041	5.79843
ENSG00000086061	DnaJ (Hsp40) homolog, subfamily A, member 1 [Source:HGNC Symbol;Acc:5229]	9	33025209	33039905	DNAJA1	protein_coding	8.15132	5.57186	9.29989	7.24817	6.71236	8.62105	8.87876	9.24659	6.0254	4.75359	3.91898	6.06659	9.30465	4.83904	8.57513	4.54434	6.39261	8.8638	8.14044	8.86311	8.05844	6.06812	5.51112	6.13071	7.9172	10.5902	7.66029	6.54607	7.5602	10.3823	8.51064	8.41181	9.54292	9.8874	8.42791	9.51325	1.20575	10.3408	9.54039	9.07226	6.38455	7.79795	8.31794
ENSG00000117595	interferon regulatory factor 6 [Source:HGNC Symbol;Acc:6121]	1	209959036	209979465	IRF6	protein_coding	0	5.72083	3.24008	6.27711	8.58931	5.58437	6.78712	0	5.81141	0	0	4.22055	5.5535	0	0	0	6.54308	0.876649	0	0	5.77582	0	0	3.05064	5.21219	2.02341	1.18523	8.17228	0	1.49882	4.37847	7.17852	7.5509	3.07958	0	0	5.23204	2.12697	0	1.10139	4.38355	0	0.552999
ENSG00000138193	phospholipase C, epsilon 1 [Source:HGNC Symbol;Acc:17175]	10	95753746	96092580	PLCE1	protein_coding	3.30965	7.0635	8.05078	0	9.21696	6.08376	8.50118	3.20858	0.851078	4.50302	0.595234	8.25081	5.4708	1.58365	6.98764	0.876338	3.65342	2.96611	7.86729	2.26977	9.12647	3.64868	8.44541	0.946169	6.57807	3.33873	9.23908	8.27465	4.18345	4.81715	4.93634	2.24233	4.01591	2.60134	2.83284	3.83353	1.92615	2.71215	3.02433	2.75265	3.85018	4.84509	7.36167
ENSG00000100890	KIAA0391 [Source:HGNC Symbol;Acc:19958]	14	35591052	35743271	KIAA0391	protein_coding	0	0	3.92037	0	0	0	4.14725	0	0	0	0	7.08336	0	0	0	8.10029	0	0	0	0	0	3.62397	0	0	0.705012	0	0	7.3659	0	1.14887	1.41324	0	6.69214	0	3.94101	8.26035	0	0	0	0	0	0	4.29905
ENSG00000172613	RAD9 homolog A (S. pombe) [Source:HGNC Symbol;Acc:9827]	11	67159176	67165881	RAD9A	protein_coding	5.45281	6.03209	4.37061	3.28618	4.42221	4.28094	6.24289	5.7529	4.55978	5.77083	5.00659	4.74054	5.4271	6.09889	3.93028	3.8545	6.27502	6.95837	6.63312	3.37465	6.28514	5.67727	7.19248	4.1117	5.6243	6.21593	5.5891	4.37426	5.96511	5.99631	5.68679	6.26113	6.43525	3.76992	5.53966	4.90178	3.39573	4.91429	5.79635	6.0497	6.85402	4.96682	5.18194
ENSG00000138443	abl-interactor 2 [Source:HGNC Symbol;Acc:24011]	2	204192942	204312446	ABI2	protein_coding	5.4577	4.97877	7.73687	7.92553	5.18797	6.99255	7.71795	6.23997	3.2902	4.89836	4.3769	7.70275	4.70758	6.90225	2.55142	3.63782	9.07094	4.1338	6.96316	7.10704	8.21299	4.43066	3.1572	6.98328	5.71709	5.79777	3.22021	8.89726	8.55509	3.93359	7.46466	6.1009	7.30389	9.51312	4.66079	4.7678	5.39576	1.68457	4.16221	2.25198	6.00372	2.09038	4.15441
ENSG00000108588	coiled-coil domain containing 47 [Source:HGNC Symbol;Acc:24856]	17	61822610	61853711	CCDC47	protein_coding	4.67512	1.10419	6.69017	2.6509	3.54258	0	5.91175	6.19276	0	8.35665	2.09082	0.493187	8.56427	2.14606	1.62239	7.07726	3.87464	4.21399	8.42319	6.44083	1.73687	3.0181	0.781936	5.50895	6.34498	9.23961	6.75722	1.72642	5.69806	6.78655	6.22128	5.11114	0	3.14506	6.30209	6.9577	3.81411	2.38128	0	4.13845	0	4.50396	5.07464
ENSG00000141431	additional sex combs like 3 (Drosophila) [Source:HGNC Symbol;Acc:29357]	18	31158579	31331156	ASXL3	protein_coding	4.5169	7.0946	8.06214	8.15531	2.11401	4.13065	4.68262	0	2.51181	0.584514	0	3.93209	5.98021	0	0	0	0	2.94277	0	8.86455	7.62447	3.57588	7.88421	0	5.41246	0	4.54195	2.8742	0	0.685898	1.68608	4.21149	3.49003	0	0	8.92247	0.521576	0	0	5.6012	0	4.08823	4.4608
ENSG00000144867	signal recognition particle receptor, B subunit [Source:HGNC Symbol;Acc:24085]	3	133502877	133544616	SRPRB	protein_coding	8.47445	8.28548	4.08882	7.69677	7.16469	5.00889	0	8.66744	0	8.12019	6.93903	7.88857	7.5184	8.53	5.72714	8.50104	7.70193	7.04733	7.72538	7.61187	8.81423	7.31162	9.19805	8.81502	3.76587	6.63533	0	6.36582	5.60409	4.26762	8.40133	7.92312	7.04211	7.68459	9.21358	1.8663	0.521576	0	8.12971	4.31489	3.34654	6.01166	6.41871
ENSG00000171109	mitofusin 1 [Source:HGNC Symbol;Acc:18262]	3	179065480	179112719	MFN1	protein_coding	4.03873	2.98056	2.22353	0	3.55734	5.43387	5.31342	7.58899	4.84527	4.83134	0.338469	7.33828	3.25037	4.73555	3.18676	2.70854	5.57508	7.48508	6.76857	3.47532	4.31324	2.27664	6.19595	5.71885	3.06246	8.37921	6.89595	4.6834	6.48379	9.51848	2.11327	7.08105	3.55848	0.581988	4.21778	3.9988	0	0	3.59887	4.25815	5.1981	4.1774	3.42614
ENSG00000164190	Nipped-B homolog (Drosophila) [Source:HGNC Symbol;Acc:28862]	5	36876861	37066515	NIPBL	protein_coding	7.57773	3.99523	8.04766	0	7.34684	6.92783	7.24292	0	0	3.85673	7.10005	7.04247	2.71285	5.75806	0	8.25958	9.43176	7.70867	2.01622	7.88906	0	6.56913	7.06712	8.61936	4.26863	8.24326	7.1147	7.00069	7.42814	6.67306	8.61021	6.13698	7.11494	7.53414	5.8413	7.72532	7.49881	8.18313	9.853	4.74289	3.88344	10.2615	3.37053
ENSG00000198231	DEAD (Asp-Glu-Ala-Asp) box helicase 42 [Source:HGNC Symbol;Acc:18676]	17	61850963	61896677	DDX42	protein_coding	0.523944	0	8.19948	1.03992	1.58369	6.89706	0.844913	7.4539	2.14425	3.24672	0	4.84365	0	3.16476	8.32347	6.0951	8.71875	8.58472	2.18674	6.76222	0	3.20061	3.87473	0.662535	8.4095	0	0	4.7863	0.575853	1.14887	6.35667	9.05698	8.11311	0	4.33466	0	0	8.90971	6.0263	7.65041	0	7.6238	6.9027
ENSG00000152270	phosphodiesterase 3B, cGMP-inhibited [Source:HGNC Symbol;Acc:8779]	11	14665269	14892350	PDE3B	protein_coding	2.81255	6.37498	4.39507	5.01007	3.81449	9.12575	4.82396	5.60492	5.91206	7.24398	8.34929	4.77573	6.86715	5.97644	6.47802	6.69033	2.36664	4.9235	3.82068	5.63585	7.69456	4.04553	3.94178	3.33939	8.82559	3.8399	4.48973	6.82421	2.99828	3.67289	7.86373	4.20637	3.39653	3.83416	5.42801	4.42562	7.0759	0.363204	3.90984	3.89467	6.16577	2.57349	2.5389
ENSG00000112335	sorting nexin 3 [Source:HGNC Symbol;Acc:11174]	6	108532426	108582464	SNX3	protein_coding	0	0	7.23984	5.24657	7.26801	0.451049	5.58416	0.475076	6.35425	4.12801	4.36173	6.97396	0	0.614652	3.68897	5.43115	4.45402	8.04186	3.87808	8.15485	1.22942	7.21415	5.62065	0	7.17668	0	5.42767	4.22724	7.84701	3.9643	8.0158	9.30365	2.96789	4.89825	2.2003	5.82184	0	8.96302	4.07871	4.57969	1.33838	7.39948	2.24399
ENSG00000164176	EGF-like repeats and discoidin I-like domains 3 [Source:HGNC Symbol;Acc:3173]	5	83236373	83680611	EDIL3	protein_coding	5.48504	7.97199	5.35896	8.70794	4.02796	4.3281	1.37424	7.82034	1.43846	2.16888	7.59765	0	6.87872	1.64374	9.07732	0	6.13524	6.37397	6.91014	2.81815	7.98377	3.50823	0	1.45869	5.64824	2.73461	5.36215	8.41998	0	4.01949	8.68597	0	0	0	9.44827	0.61277	6.91089	9.37062	7.63112	4.13845	1.33838	10.8964	5.64527
ENSG00000147416	ATPase, H+ transporting, lysosomal 56/58kDa, V1 subunit B2 [Source:HGNC Symbol;Acc:854]	8	20054878	20084330	ATP6V1B2	protein_coding	8.69925	6.04358	10.1815	8.83181	8.44243	10.3249	6.37511	4.65418	2.57426	5.78645	11.9429	3.81289	3.97395	3.7812	7.72826	7.12062	6.86667	7.80351	9.14178	8.73024	6.14961	6.0084	6.92914	7.04597	7.7311	8.37935	0.711054	9.55534	6.37633	8.58449	9.43199	4.34553	7.52885	7.54039	7.46428	7.60891	0.521576	9.92236	9.75318	7.78764	9.51513	0	8.85483
ENSG00000139146	family with sequence similarity 60, member A [Source:HGNC Symbol;Acc:30702]	12	31433518	31479992	FAM60A	protein_coding	4.56493	7.76169	7.37885	0	3.36751	1.83858	6.0906	4.9691	4.45849	2.6993	6.6018	5.4917	5.35699	4.42973	6.1527	7.63423	5.02385	0.971973	4.74351	4.22149	5.24333	5.30512	0.781936	4.3176	6.08756	5.25094	4.43724	0	0.625219	6.11154	5.633	0	6.21385	4.28356	0	1.04891	0	0	1.12272	1.34532	0	0	0
ENSG00000185219	zinc finger protein 445 [Source:HGNC Symbol;Acc:21018]	3	44481262	44519162	ZNF445	protein_coding	1.99665	3.98059	0.333722	5.80184	2.32616	2.44876	3.52373	1.65125	3.00067	2.78962	0	3.83284	2.70617	5.02494	1.36094	1.8641	2.78168	3.14585	3.09543	2.96474	2.93159	3.59165	4.50038	0.806511	2.61131	3.12622	4.58048	2.72099	4.06566	3.77199	4.01473	4.49084	3.40817	3.06851	5.53519	3.00878	2.29345	7.94959	4.79158	5.00337	4.05113	0	4.28598
ENSG00000113638	tetratricopeptide repeat domain 33 [Source:HGNC Symbol;Acc:29959]	5	40714577	40756077	TTC33	protein_coding	0	0.655252	8.59016	0	0	0	5.9427	0	0	0	1.06118	0	0	0	0	0	0	0	6.87314	0	0	0	0	4.71998	6.44843	0	0	0	0	0	0	1.97123	0	0	3.23113	0	5.03532	5.38671	4.84161	0	6.62696	0	0
ENSG00000130066	spermidine/spermine N1-acetyltransferase 1 [Source:HGNC Symbol;Acc:10540]	X	23801290	23804343	SAT1	protein_coding	7.82063	7.38494	0	5.007	1.22131	6.17402	7.67819	8.38225	0	7.76021	8.50034	7.25369	8.72025	10.6389	8.45156	3.84078	8.22121	10.4951	10.8469	7.9929	3.0697	8.77474	9.07836	10.6083	8.25737	5.00481	4.65569	7.58348	8.8094	3.90691	7.83844	9.39724	8.69493	5.29507	4.10273	8.81977	9.73399	5.11603	4.31042	8.0841	6.24613	0	8.88224
ENSG00000033800	protein inhibitor of activated STAT, 1 [Source:HGNC Symbol;Acc:2752]	15	68346517	68483096	PIAS1	protein_coding	6.26216	8.35045	6.12382	8.80481	6.06421	5.78015	7.83229	0.831864	4.95096	7.75355	1.06118	0	9.08206	9.1746	0	0	7.99594	6.651	6.33419	5.9967	5.41571	9.81831	9.04141	5.82434	4.17107	6.03289	9.42827	4.05475	6.95	8.11557	4.75805	0	5.06236	0	4.80571	5.53949	7.39811	2.59741	0	8.14667	3.88344	0	1.52031
ENSG00000137392	colipase, pancreatic [Source:HGNC Symbol;Acc:2085]	6	35762759	35765088	CLPS	protein_coding	0	0	0	0	0	0	0	0	0	0	0	0	0	0	0	0	0	0	0	0	0	0	0	0	0	0	0	0	0	0	0	0	0	0	0	0	0	0	0	0	0	0	0
ENSG00000088832	FK506 binding protein 1A, 12kDa [Source:HGNC Symbol;Acc:3711]	20	1349622	1373806	FKBP1A	protein_coding	6.62421	2.75466	6.56113	5.76378	5.04255	7.41422	5.6079	7.64029	0	5.64254	1.06118	6.64436	4.82149	6.06323	2.25004	7.58433	0	5.22867	8.85116	5.8296	3.98112	8.61438	5.88934	8.5717	7.45058	7.22355	4.58087	5.40493	7.63057	6.33521	5.76095	4.47102	4.56963	7.04641	6.5712	8.73383	8.6022	7.80917	5.27359	7.30332	4.88462	7.6637	6.95795
ENSG00000118689	forkhead box O3 [Source:HGNC Symbol;Acc:3821]	6	108881038	109005977	FOXO3	protein_coding	0	0.345054	1.49663	5.98787	4.62889	6.72238	4.1466	3.22673	0	3.69308	3.68306	0	7.31583	6.85821	0	7.15775	8.87183	2.19489	8.81154	0.674414	6.99859	7.71646	6.142	0.3526	8.09576	2.09964	5.36639	0	2.0681	1.28123	7.47814	2.1925	6.8439	0.92555	2.39532	2.11038	0	5.93811	5.43643	0	2.85844	7.9115	1.25825
ENSG00000132356	protein kinase, AMP-activated, alpha 1 catalytic subunit [Source:HGNC Symbol;Acc:9376]	5	40759481	40798476	PRKAA1	protein_coding	4.79146	4.56416	0	3.88116	4.59789	7.05556	5.56875	3.22793	5.67511	6.69438	0.0911216	4.11897	4.02184	4.9055	0	0	6.25392	3.0413	3.50896	1.89492	4.0211	8.76479	2.97911	1.4262	4.38937	9.63057	3.51205	1.76993	2.75588	8.72194	6.03512	3.38537	2.77402	4.54357	2.74529	6.41939	4.91718	3.44484	1.44944	6.12445	3.66612	5.38978	5.79758
ENSG00000204390	heat shock 70kDa protein 1-like [Source:HGNC Symbol;Acc:5234]	6	31777396	31783437	HSPA1L	protein_coding	0.537065	0	0	0	0	0	0	0	0	0	0	0	0	0	0	7.09975	0	0	0	0	0	0	0	0	0	0	0	0	0	0	0	5.08158	0	0	0	0	0	0	0	0	0	0	0
ENSG00000204389	heat shock 70kDa protein 1A [Source:HGNC Symbol;Acc:5232]	6	31783291	31785723	HSPA1A	protein_coding	1.50098	0	1.22322	0	4.14116	0	4.49161	0	3.87603	0	6.90455	0	0	0	0	0	1.20624	10.6175	0.71771	0	2.51262	0	0	0.36897	0	5.71972	3.89037	7.57945	1.2028	9.52058	2.44244	1.29896	0	3.94583	0	1.6571	0	0	9.37209	0	0	4.50396	4.70023
ENSG00000164949	GTP binding protein overexpressed in skeletal muscle [Source:HGNC Symbol;Acc:4234]	8	95261481	95274578	GEM	protein_coding	5.35216	0	0.737545	0	0	3.62971	0.844913	0	0	0	1.66597	0	0	0	4.86677	0	0	7.84082	8.19893	6.42965	0	10.5668	0	6.60679	0	0	0	0	2.10495	7.0093	0	0	2.61304	8.10223	5.06012	0	0	0	0	7.86056	5.95762	0	0
ENSG00000088205	DEAD (Asp-Glu-Ala-Asp) box polypeptide 18 [Source:HGNC Symbol;Acc:2741]	2	118572226	118589955	DDX18	protein_coding	3.22773	7.02173	3.57986	3.8687	5.35382	5.4508	5.44633	4.48208	0	6.3242	5.92275	6.26786	4.51927	6.23167	5.38933	7.42614	4.58317	5.40157	6.50144	4.88302	5.30254	6.22636	4.16706	4.8131	4.63489	5.65981	5.57066	6.68359	5.78603	5.30868	4.81627	2.82734	5.98198	5.46131	4.06861	5.05409	7.57595	2.50092	4.79647	7.05582	6.77244	4.58007	5.21207
ENSG00000076108	bromodomain adjacent to zinc finger domain, 2A [Source:HGNC Symbol;Acc:962]	12	56989380	57030600	BAZ2A	protein_coding	7.53498	3.93956	7.46904	2.05948	2.66136	3.18186	6.94721	6.55299	7.7634	3.75364	0.629416	5.78809	2.67113	4.66722	6.11377	2.59528	1.48756	8.56893	2.60658	4.41778	6.25497	4.23948	9.40818	5.08456	3.87399	7.59868	4.37837	0.508055	8.428	3.39841	7.59953	5.11662	3.64759	5.23922	7.77603	7.14736	3.27954	0	3.37972	6.10429	5.75976	8.52627	0
ENSG00000166224	sphingosine-1-phosphate lyase 1 [Source:HGNC Symbol;Acc:10817]	10	72575717	72640930	SGPL1	protein_coding	7.69316	9.11076	10.4782	1.03992	5.09913	8.01074	4.61861	8.40749	0	2.67242	6.76132	7.14044	9.17333	1.55785	6.27498	9.77331	0	9.3764	7.16149	3.40033	4.43752	10.0998	0.720272	5.83911	3.47758	0	0.705429	6.28198	0.557475	4.51351	6.88927	7.30323	7.269	2.89914	5.6141	2.036	4.36447	12.1954	7.72886	0.648081	0	10.0046	0
ENSG00000100906	nuclear factor of kappa light polypeptide gene enhancer in B-cells inhibitor, alpha [Source:HGNC Symbol;Acc:7797]	14	35870717	35873955	NFKBIA	protein_coding	6.32655	0	0.737545	0	0	6.59139	0	0	0	5.49054	6.55038	0	6.12297	0	1.67426	1.95671	0	5.39126	2.47711	1.51719	3.55555	7.29164	0.781936	7.48198	6.45881	7.16517	0	0	0	2.82518	0	0	6.80591	0	5.61304	5.99941	8.69457	7.19639	0	0	9.42175	4.08823	0
ENSG00000162971	tRNA-yW synthesizing protein 5 [Source:HGNC Symbol;Acc:26754]	2	200794698	200820459	TYW5	protein_coding	1.9236	3.31318	0.436895	2.31354	0.764751	1.25321	4.5898	2.91161	0.163141	2.36768	1.28997	3.43806	3.91334	4.03788	0	2.72041	2.7679	3.99998	5.05897	0.551476	3.74832	2.74238	4.1968	0.980668	3.18047	4.004	2.22118	1.63722	1.80734	5.78848	3.2369	1.69684	4.24345	0.827966	2.50296	3.85953	6.8899	0.945757	2.19899	2.03322	5.14549	3.4966	8.0612
ENSG00000174720	La ribonucleoprotein domain family, member 7 [Source:HGNC Symbol;Acc:24912]	4	113558120	113578748	LARP7	protein_coding	5.20579	2.15359	0	4.77626	4.92099	0	0.844913	7.20209	0	7.79632	6.67323	2.74539	5.14352	1.64374	0	0.782777	7.2417	2.58896	0.592192	3.90376	6.18803	0	5.97433	2.57394	0.705012	5.80377	3.00126	6.32842	6.12654	4.76417	5.27436	3.96395	0	4.16148	3.69886	2.6535	0	0	5.25147	5.77727	1.33838	0.600669	4.36594
ENSG00000146021	kelch-like family member 3 [Source:HGNC Symbol;Acc:6354]	5	136953189	137071779	KLHL3	protein_coding	1.58339	6.41081	5.35896	0	0	2.42431	0	6.38873	1.58342	4.10726	0	5.31849	2.41243	0.614652	1.27956	0	2.77343	2.5317	1.40018	1.00742	1.6499	1.7247	7.12031	1.04321	3.31353	0	7.45637	0	5.39132	9.01005	2.08903	2.91376	2.575	0	2.80836	0.941704	2.37323	7.64178	3.18239	2.80207	11.2078	1.45163	3.2282
ENSG00000130741	eukaryotic translation initiation factor 2, subunit 3 gamma, 52kDa [Source:HGNC Symbol;Acc:3267]	X	24072833	24096088	EIF2S3	protein_coding	10.1137	9.42506	9.16576	2.5242	6.25475	8.78724	7.78698	8.06697	0	7.29494	9.57168	8.00534	8.2395	9.45171	6.56422	10.1528	6.94568	6.97284	10.1344	1.72855	8.60557	5.82734	5.98421	8.11268	6.71409	8.36252	8.66589	0.525083	9.9796	7.44158	8.38647	8.90925	8.79479	8.94798	9.29737	8.90886	1.66794	2.13391	7.78958	6.43287	8.52933	6.79445	8.56197
ENSG00000008018	proteasome (prosome, macropain) subunit, beta type, 1 [Source:HGNC Symbol;Acc:9537]	6	170844205	170862429	PSMB1	protein_coding	6.827	1.95399	7.85319	4.90897	8.6311	8.21527	7.49294	6.97496	0.891542	6.50646	9.08349	7.51387	2.47143	7.67182	7.25886	8.86989	8.59495	9.47849	8.11161	9.58199	7.57445	8.17425	0.781936	8.92377	8.28387	9.63904	3.56425	8.70613	7.98233	9.26058	8.7356	0	8.64046	7.34867	8.92429	9.5585	0	8.89957	8.44939	4.18462	6.4107	3.56618	7.59588
ENSG00000092841	myosin, light chain 6, alkali, smooth muscle and non-muscle [Source:HGNC Symbol;Acc:7587]	12	56551945	56557280	MYL6	protein_coding	10.5372	9.68873	10.19	9.79623	10.6213	7.96633	9.71584	9.05581	8.77627	10.0093	4.90578	9.40439	9.19463	8.68885	9.77603	8.43194	8.46933	9.53238	9.59898	10.1464	9.81646	10.2249	9.63136	9.51496	9.49925	8.92785	9.22723	9.71033	9.92656	9.75817	9.75443	9.55851	9.34418	10.0431	9.1856	10.5625	9.26464	10.5835	8.89437	7.88121	10.0821	9.55179	9.32528
ENSG00000123684	lysophosphatidylglycerol acyltransferase 1 [Source:HGNC Symbol;Acc:28985]	1	211916799	212004114	LPGAT1	protein_coding	3.23042	7.09423	5.94893	0	0.759087	2.20871	6.31809	5.97265	7.7981	7.78277	6.60277	5.278	8.5716	7.16434	5.95734	5.3523	6.20976	4.02613	1.1559	9.43301	4.40767	0.623652	7.59576	7.124	9.18731	5.97505	4.19535	7.92586	7.03475	9.23542	7.47481	3.55092	5.92465	0.929319	3.89874	5.49887	0	2.29109	6.91647	8.32068	5.29397	0	2.53309
ENSG00000204388	heat shock 70kDa protein 1B [Source:HGNC Symbol;Acc:5233]	6	31795512	31798031	HSPA1B	protein_coding	5.21925	0	0	0	0	0.451049	3.50463	0	0	6.0321	0	0	0	1.87024	0	0	0.725676	9.73237	2.68837	0	2.33176	0	0	0	1.17652	9.1965	4.20036	6.48803	4.32055	9.35078	0	0.790987	2.47229	0	3.40445	6.7671	0	0.506906	7.16031	0	1.33838	0	6.81856
ENSG00000173145	nucleolar complex associated 3 homolog (S. cerevisiae) [Source:HGNC Symbol;Acc:24034]	10	96075004	96122716	NOC3L	protein_coding	5.305	0	0	0	2.32041	0	4.08093	0	0.51357	0	0	0	0	0	3.91539	2.50662	6.69526	0	0	0	1.59316	0.628758	0	0	5.43365	3.68674	0	7.28468	0	0	0	0	3.62914	7.48296	0	0.61277	0	0	0	0	4.83371	1.35008	0
ENSG00000141198	target of myb1 (chicken)-like 1 [Source:HGNC Symbol;Acc:11983]	17	52976748	53039310	TOM1L1	protein_coding	2.79445	8.59383	0	5.87181	4.50068	7.47596	6.38532	3.75272	0	6.55571	5.85467	7.62437	7.44373	4.54583	0	6.19311	8.83703	9.04148	0	0.551476	1.59316	0	7.97487	0	6.46232	4.76571	8.16673	0	5.23694	5.90795	6.68878	9.08053	7.6279	8.32236	7.99928	2.52675	5.58606	3.35924	1.97963	6.56826	6.37022	2.88015	0
ENSG00000089157	ribosomal protein, large, P0 [Source:HGNC Symbol;Acc:10371]	12	120634489	120639038	RPLP0	protein_coding	9.20268	8.25281	10.0831	7.94829	9.53563	10.2455	9.56161	8.88897	8.48089	9.57868	9.3797	10.4177	9.59378	6.85444	9.80833	9.85266	9.25021	7.89016	11.3105	9.53239	9.68973	10.2897	7.34333	9.02722	9.40874	7.96488	9.1034	10.5895	7.66115	10.067	10.748	11.1888	9.70585	9.58872	10.4797	11.1483	9.05334	6.92104	10.1455	10.8148	8.47309	9.09285	10.2133
ENSG00000114127	5'-3' exoribonuclease 1 [Source:HGNC Symbol;Acc:30654]	3	142025449	142166904	XRN1	protein_coding	5.6685	7.75806	6.06248	1.92551	5.56718	5.33265	6.94031	8.86111	5.20134	6.56814	4.5392	4.12909	6.49847	7.50275	1.35918	7.64268	4.37305	4.39917	1.08173	8.92474	7.3962	2.83806	5.02319	7.14438	4.66316	9.55241	6.47957	7.32261	5.98157	4.74038	8.83217	3.44559	1.83606	0.365366	8.84661	5.39782	0	2.02918	7.13817	3.43993	7.06192	6.79539	1.86736
ENSG00000121578	UDP-Gal:betaGlcNAc beta 1,4- galactosyltransferase, polypeptide 4 [Source:HGNC Symbol;Acc:927]	3	118930579	118959950	B4GALT4	protein_coding	1.72006	1.25776	7.4636	8.07562	3.83752	6.11802	3.38108	2.34685	1.83409	6.56875	4.66276	4.52174	1.13891	0.952253	0.841644	0	0.731368	3.5227	3.18912	0	2.50409	4.16764	5.64159	0	6.48948	5.96985	3.30912	6.04503	1.97077	1.49882	0.676996	2.93733	2.07092	4.89753	6.41471	0	0	1.32606	1.12272	0.395113	9.36936	0	1.57562
ENSG00000133706	leucyl-tRNA synthetase [Source:HGNC Symbol;Acc:6512]	5	145492601	145562223	LARS	protein_coding	6.0482	6.35516	2.10321	6.40407	6.73056	5.67059	4.82882	3.58282	0.972364	6.43638	0	6.72177	5.91576	3.45694	6.86827	2.77534	9.39191	0	7.91928	9.67076	4.85851	6.10705	6.23188	1.60684	3.29327	7.06987	6.41728	3.5122	5.21512	7.85269	6.37847	7.59534	8.61813	5.02012	5.75716	5.22794	0.445179	0	8.29801	6.76398	5.93039	7.78284	4.27139
ENSG00000105939	zinc finger CCCH-type, antiviral 1 [Source:HGNC Symbol;Acc:23721]	7	138728266	138794465	ZC3HAV1	protein_coding	5.50173	7.49317	6.47533	5.62912	5.2326	6.09558	8.77136	7.10252	8.30359	7.34951	9.03063	7.59776	7.30739	4.89523	8.5511	9.26408	4.71648	4.04159	7.61852	1.15649	8.82806	5.25214	8.78795	4.85075	7.49541	8.93612	8.61566	7.96546	2.67294	6.01775	7.54297	4.7902	7.11127	9.31887	3.94999	9.47716	3.91669	1.04917	2.83613	8.59971	5.86605	4.94643	2.65259
ENSG00000221978	cyclin L2 [Source:HGNC Symbol;Acc:20570]	1	1321091	1334708	CCNL2	protein_coding	1.46939	0.660509	0	9.71388	6.79331	3.21131	5.41814	0	2.27745	7.10771	7.08473	5.49052	6.98032	1.04431	8.90975	1.2874	3.7463	0	5.91604	1.26108	7.34837	0	0	0	2.59184	4.68109	0	4.49369	7.02507	1.50192	7.19256	3.57852	4.90313	1.31657	7.24243	4.88637	5.40528	5.52503	3.2527	5.55923	6.99174	4.1897	1.74603
ENSG00000148516	zinc finger E-box binding homeobox 1 [Source:HGNC Symbol;Acc:11642]	10	31607424	31818742	ZEB1	protein_coding	0.523944	0.655252	0	0	0	0.794161	0	1.56069	0	0	0	1.15228	0	0	8.69004	7.85512	3.03394	0	3.60476	0.551476	3.4706	7.7636	0	1.11485	5.43365	0	0	0	0	2.01561	0	0	0	4.4509	4.41791	0	0	0	0	0	2.83081	0	0
ENSG00000005955	gametogenetin binding protein 2 [Source:HGNC Symbol;Acc:19357]	17	34900737	34946278	GGNBP2	protein_coding	4.21064	5.42265	6.70741	7.20751	1.58369	1.83562	8.39603	6.49678	0	5.5986	5.33917	7.38964	7.1773	9.24462	7.3558	7.66337	5.88697	7.74286	5.95421	4.62905	8.47892	8.322	4.40709	4.67213	1.78978	1.95561	4.13491	3.582	7.15341	5.25289	6.00467	5.78888	7.31882	4.87254	7.42321	2.6535	2.99428	2.12558	7.37893	1.45789	9.0538	0.600669	7.93571
ENSG00000197461	platelet-derived growth factor alpha polypeptide [Source:HGNC Symbol;Acc:8799]	7	536895	559933	PDGFA	protein_coding	7.5135	6.94107	2.11659	2.05948	7.03153	3.06017	6.11831	7.02334	6.39146	3.08628	6.8958	7.3251	6.32736	0.614652	1.35918	4.10517	9.21721	2.11916	7.61393	0	5.62674	7.73059	6.58445	8.30129	8.5592	2.60649	8.11943	1.1804	3.01353	6.19841	5.94099	0	0	3.23993	7.06008	1.8663	0	6.87278	6.09003	3.70366	7.13041	8.8794	7.05743
ENSG00000134769	dystrobrevin, alpha [Source:HGNC Symbol;Acc:3057]	18	32073254	32471808	DTNA	protein_coding	7.58929	6.31374	5.98632	1.8992	2.19176	1.69551	4.0298	3.07675	0	3.13138	3.14317	2.94183	4.5507	3.84232	2.42844	3.5851	5.72435	4.27632	3.36288	3.62981	8.66121	4.41265	4.78572	8.25227	7.02278	5.09829	3.38057	0.340212	5.2703	5.91728	5.15954	4.81212	4.90888	3.63851	4.5092	4.68207	6.80063	2.64285	4.34594	3.0487	4.76318	5.09246	4.69243
ENSG00000096433	inositol 1,4,5-trisphosphate receptor, type 3 [Source:HGNC Symbol;Acc:6182]	6	33588142	33664351	ITPR3	protein_coding	7.87815	0	0	8.31214	0.736204	6.52969	0	0	0	0	4.71999	0	0	6.61776	0	10.2624	0	5.67712	0	0	0	0	0	5.49205	0	6.65165	0	0	7.28276	6.72379	0.636405	3.05356	0	1.80097	8.33726	1.3716	0	0	4.22215	0	8.38479	0.600669	0
ENSG00000174373	Ral GTPase activating protein, alpha subunit 1 (catalytic) [Source:HGNC Symbol;Acc:17770]	14	36007558	36278510	RALGAPA1	protein_coding	5.49908	7.17141	0	2.23156	5.7619	0.451049	7.64987	0.475076	0	5.26548	9.15848	3.9701	7.73226	1.64619	4.76745	0	7.75528	5.57404	0	2.49974	4.30934	0	2.41051	6.6493	4.13582	8.9256	6.92074	0	5.34419	7.1761	3.06881	5.46747	3.16369	7.37049	1.99872	3.46658	4.45319	0	8.90593	7.71477	4.6701	8.89044	4.70902
ENSG00000166562	SEC11 homolog C (S. cerevisiae) [Source:HGNC Symbol;Acc:23400]	18	56806709	56826068	SEC11C	protein_coding	8.66392	4.40062	7.76742	7.53366	7.53468	5.87343	6.54464	7.28018	4.51137	6.86903	8.37845	6.38068	4.26182	10.2997	5.92596	9.08036	7.13839	10.6741	6.15056	5.8296	8.96159	2.1223	5.5337	5.31326	7.2261	8.58882	4.37483	6.76905	0.958569	7.34798	8.70526	10.0753	8.28039	8.48093	9.14957	7.478	7.30582	7.71298	9.43028	3.88239	7.52702	8.67403	2.24399
ENSG00000127324	tetraspanin 8 [Source:HGNC Symbol;Acc:11855]	12	71518865	71835678	TSPAN8	protein_coding	0	0	0	0	0	0	0	0	0	0	0	0	0	0	0	0	0	0	0	3.29955	0	0	0	0	0	0	0	0	0	0	0	0	0	0	0	0	0	4.43489	0	0	0	0	0
ENSG00000188280	family with sequence similarity 230, member A [Source:HGNC Symbol;Acc:45045]	22	20692438	20716938	FAM230A	protein_coding	1.90009	3.08395	2.62726	0	0.730427	1.21495	2.27663	3.41256	1.39924	2.6993	3.00614	1.7003	2.00739	0.979714	0.436993	1.05454	0	0	1.74193	0	0	1.58721	2.24521	1.50683	1.68341	2.86465	2.43	3.56358	0.979428	1.88618	1.59898	2.1925	2.36331	5.07198	2.35025	1.88296	2.71788	0	0	1.7361	3.09621	0	2.4368
ENSG00000010438	protease, serine, 3 [Source:HGNC Symbol;Acc:9486]	9	33750515	33799230	PRSS3	protein_coding	0	2.75466	0	0	0	0	0.844913	5.09378	0	6.37371	0	0	0	0	0	0	3.81491	0	0	0	0	0	0	7.02997	6.55863	0	0	0	0	0.685898	0	0	0	0	0	0	0	0	0	3.07836	0	0	0
ENSG00000102804	TSC22 domain family, member 1 [Source:HGNC Symbol;Acc:16826]	13	45007655	45151283	TSC22D1	protein_coding	8.96252	5.57186	9.52174	7.40473	8.11877	6.71247	7.39397	6.90626	8.87274	7.13309	11.3148	7.47474	6.3364	10.0053	0	6.93539	9.73707	8.731	6.22096	7.44072	7.85143	0.628758	9.28381	6.63245	7.6983	9.94827	2.06523	7.04748	7.59582	9.14124	7.04276	6.65886	9.17113	8.0079	9.10473	4.3256	6.03248	8.34505	9.19682	6.91549	8.06064	8.32492	6.05308
ENSG00000184349	ephrin-A5 [Source:HGNC Symbol;Acc:3225]	5	106712590	107006596	EFNA5	protein_coding	8.97638	8.62918	8.67033	9.94133	0	5.95251	8.48573	7.36795	0	9.26661	10.908	7.28796	0	9.00747	8.62289	7.80022	8.0715	7.80351	1.01083	5.85303	7.51736	0	8.52885	6.76206	8.02234	11.0554	0	0	0	4.17342	8.04335	3.48846	8.43773	8.94236	9.2538	2.6535	9.13095	9.85346	9.99128	6.56896	8.74494	0	8.83137
ENSG00000196263	zinc finger protein 471 [Source:HGNC Symbol;Acc:23226]	19	57019212	57041590	ZNF471	protein_coding	6.74433	7.27598	4.29905	8.94236	6.57826	6.54201	6.28651	6.54096	6.30587	6.20735	4.90369	5.23446	3.75773	5.06005	3.88513	3.87589	6.62026	9.30538	6.86494	3.07884	6.49563	6.80679	6.2276	2.47305	6.61425	7.97302	6.49157	4.95836	5.69596	5.90239	7.03448	7.69139	6.43487	4.3641	6.95166	5.05202	5.21556	5.9614	4.65361	5.30331	8.55875	4.6491	5.17897
ENSG00000204386	sialidase 1 (lysosomal sialidase) [Source:HGNC Symbol;Acc:7758]	6	31825436	31830683	NEU1	protein_coding	7.71554	6.41713	6.54059	8.11493	8.33412	7.96343	7.36047	1.75657	2.70394	6.12083	5.52575	6.06536	3.80281	9.01656	5.03505	1.10856	7.36112	4.46182	3.20112	1.18336	3.21676	2.27826	5.80812	2.02045	5.81416	9.4615	4.80682	7.42433	4.12029	9.05084	7.52166	5.16705	3.82478	9.09403	7.6628	9.98477	0	7.63568	2.23733	2.06319	3.94631	8.48105	3.4072
ENSG00000059728	MAX dimerization protein 1 [Source:HGNC Symbol;Acc:6761]	2	70124820	70170077	MXD1	protein_coding	2.74254	4.27773	0	0	8.66935	0	4.14725	0	0.51357	0	0	0	0	6.70114	0	0	3.67425	9.62775	7.6581	1.51719	0	0	2.20075	5.80943	3.38576	2.96106	4.95135	8.59555	0	8.24856	0	0	0	0.581988	0	0	0	0	9.71022	0	2.02054	0	0
ENSG00000135679	MDM2 oncogene, E3 ubiquitin protein ligase [Source:HGNC Symbol;Acc:6973]	12	69201956	69239214	MDM2	protein_coding	6.8886	5.00147	3.33949	4.55333	5.90966	7.13422	4.66462	3.82675	2.5938	7.30194	8.33829	5.74828	2.97533	5.38086	5.36598	3.90671	7.66384	5.73217	8.75147	2.93167	6.47419	3.77724	6.7472	6.82589	4.12074	5.60604	2.75125	0	3.09224	7.55225	9.48903	4.57458	8.53174	5.79522	8.86778	7.4536	4.45262	1.84702	4.90791	7.10678	3.79087	1.36751	5.49646
ENSG00000074695	lectin, mannose-binding, 1 [Source:HGNC Symbol;Acc:6631]	18	56995055	57027194	LMAN1	protein_coding	8.50259	7.55777	7.69957	8.45575	5.89698	2.10545	4.54179	7.80784	8.78596	7.25133	4.38692	6.29342	4.33586	7.88133	7.16756	8.34677	7.50315	4.60946	6.73562	6.38212	6.59209	6.65765	7.89733	7.81822	8.03972	9.82775	4.02574	3.8588	7.92748	5.63507	7.25139	5.38869	8.04597	8.11003	8.14296	8.27635	5.03532	9.94626	3.97449	0	2.83081	8.22388	6.64432
ENSG00000109689	stromal interaction molecule 2 [Source:HGNC Symbol;Acc:19205]	4	26859300	27027003	STIM2	protein_coding	0	0	6.42209	5.85874	7.545	0	5.69916	7.11142	0	0.584514	1.06118	0	0	0	6.75168	0	4.22105	6.60217	0	0	5.91092	0	0	0	3.76587	0	9.21598	0	0	5.00198	4.66652	1.29896	0	5.34883	0	0	0	7.11985	6.67625	0	4.75422	2.49768	0
ENSG00000129003	vacuolar protein sorting 13 homolog C (S. cerevisiae) [Source:HGNC Symbol;Acc:23594]	15	62144588	62352672	VPS13C	protein_coding	7.30168	8.66642	5.69258	5.60067	7.53468	7.48686	9.1775	3.87893	4.10836	6.04252	6.41161	7.17703	5.16399	8.47068	9.09295	7.84453	9.66953	8.41625	8.43829	9.36631	8.20315	10.1468	7.8533	4.96163	8.01033	9.36793	8.38746	7.79248	8.27816	7.42159	8.87881	3.92979	7.42264	6.32289	8.76003	7.21572	3.07105	4.90924	8.62965	6.23906	6.94882	6.95222	3.43426
ENSG00000139613	SWI/SNF related, matrix associated, actin dependent regulator of chromatin, subfamily c, member 2 [Source:HGNC Symbol;Acc:11105]	12	56556767	56583351	SMARCC2	protein_coding	6.78809	3.67706	7.81877	2.89882	2.34519	3.71968	4.25645	7.58949	2.06539	5.61162	4.73341	5.01854	2.58631	5.67919	2.62868	2.72828	2.8102	6.74149	7.27543	1.60372	3.72284	7.81437	6.9422	2.29944	7.80447	3.76925	6.35083	5.91138	4.07377	7.64401	5.53376	4.46436	5.30475	7.00593	6.69302	9.04467	4.40121	8.10456	8.29274	3.79579	5.69483	3.438	3.28116
ENSG00000133112	tumor protein, translationally-controlled 1 [Source:HGNC Symbol;Acc:12022]	13	45911008	45915505	TPT1	protein_coding	9.45902	8.04917	10.1448	8.52477	9.89342	9.13681	8.52679	8.00605	8.48393	9.19661	9.55697	9.02073	9.07127	8.31583	8.83457	9.39405	7.87408	9.64763	9.77895	9.77451	9.31528	10.2522	8.60012	7.32039	8.42809	8.02256	7.88685	9.44786	10.5786	9.29174	8.711	8.08707	8.21839	9.59655	8.95584	7.70717	7.86461	9.59689	9.05646	8.55492	9.4504	8.04644	7.81521
ENSG00000213988	zinc finger protein 90 [Source:HGNC Symbol;Acc:13165]	19	20188803	20237885	ZNF90	protein_coding	5.7008	5.03626	4.05563	3.45754	4.31964	3.93646	5.52876	5.56162	4.21517	5.12199	3.04592	5.93976	5.35486	7.07577	4.67694	4.53518	5.70604	6.17632	5.93507	4.31624	5.58268	4.96731	6.1934	4.36183	5.47245	5.92704	5.72075	3.25522	6.22389	6.11129	5.68648	6.84705	5.79146	5.11088	5.85943	4.50442	4.06671	4.79158	6.07575	5.52428	6.86749	4.24024	5.23713
ENSG00000145592	ribosomal protein L37 [Source:HGNC Symbol;Acc:10347]	5	40825364	40835437	RPL37	protein_coding	9.21089	5.45155	6.13797	6.11103	7.29285	3.88936	5.06262	6.21345	3.22901	6.39545	7.04361	5.89669	6.87027	8.62016	6.99856	9.6088	6.15972	5.33619	7.80687	5.77188	6.50036	8.12705	5.52877	7.08048	5.87569	6.25138	5.25336	7.87054	10.1733	7.7566	8.13094	7.83294	7.80676	6.45018	6.93084	6.63192	6.02565	7.76285	5.89813	5.83458	7.63059	7.4988	6.1687
ENSG00000145782	autophagy related 12 [Source:HGNC Symbol;Acc:588]	5	115163893	115177555	ATG12	protein_coding	7.95277	2.25785	8.04164	0	6.92577	2.64099	7.79326	0	6.81114	6.26761	0.502374	0.86005	0.830144	8.77147	6.79589	8.54755	8.17426	7.15628	5.79624	3.52284	7.02333	1.02317	8.66564	4.33832	3.62781	6.54139	1.40243	8.36973	4.86405	5.77427	6.11865	0	4.0042	0.827966	1.18681	5.42704	0.242352	3.10347	2.10734	0.653344	4.68475	4.83912	5.83419
ENSG00000056097	zinc finger RNA binding protein [Source:HGNC Symbol;Acc:17277]	5	32354456	32444867	ZFR	protein_coding	6.17741	8.66844	5.57633	7.23811	5.12743	3.82916	6.25993	2.85596	6.09022	6.69911	8.78729	9.19435	6.13339	8.04406	5.04151	5.43115	7.94327	7.19458	6.91014	5.7693	7.59968	7.06323	8.06948	2.42531	3.09793	8.49469	6.33315	6.82384	6.79317	6.71546	7.75203	8.45748	6.49632	0	7.87849	2.38779	0	9.60393	6.05213	0	9.38593	7.18071	0.552999
ENSG00000125848	fibronectin leucine rich transmembrane protein 3 [Source:HGNC Symbol;Acc:3762]	20	14303634	14318262	FLRT3	protein_coding	0	0	0	0	5.35569	0	2.31637	0	0	0	0	0	0	0	0	0	2.09369	0	0	1.26108	0	3.28388	0	0	0	0	0	0	5.89457	2.21792	0	0.790987	0	0	0	0	0	0	0	6.0258	0	0	0
ENSG00000160182	trefoil factor 1 [Source:HGNC Symbol;Acc:11755]	21	43782391	43786703	TFF1	protein_coding	0	0	0	0	0	0	0	0	0	0	0	0	0	0	0	0	0	0	0	0	0	0	0	0	0	0	0	0	0	0	0	0	0	0	0	0	0	0	0	0	0	0	0
ENSG00000217128	folliculin interacting protein 1 [Source:HGNC Symbol;Acc:29418]	5	130977407	131132710	FNIP1	protein_coding	8.3599	7.94424	9.88964	6.45541	1.87308	8.27254	6.16388	6.7891	4.84763	7.3182	8.31841	6.96392	7.18448	2.53257	7.14632	7.55507	6.73067	9.14378	9.35689	0.949474	7.50684	8.65747	1.65915	2.70867	8.11939	4.10608	1.54151	7.99268	5.97618	5.29242	6.68971	6.89706	7.48858	6.22048	7.65226	3.89947	0	7.13657	8.63609	7.51862	8.77998	2.04957	6.62888
ENSG00000132581	stromal cell-derived factor 2 [Source:HGNC Symbol;Acc:10675]	17	26975374	26989207	SDF2	protein_coding	2.83397	3.17768	0	0.611701	0	0	4.63719	0	0	4.52228	8.45787	5.8594	1.59475	7.24657	2.51	6.6343	7.26641	0	5.7491	7.76176	8.01785	0	5.64159	4.43906	2.2573	0.646696	8.5157	6.76905	5.73762	2.01561	5.44932	7.45559	0	7.38772	7.33101	0	0	3.41724	7.97963	0	0	0	7.52447
ENSG00000148848	ADAM metallopeptidase domain 12 [Source:HGNC Symbol;Acc:190]	10	127700950	128077024	ADAM12	protein_coding	0	0	0	0	0	0	0	0	0	0	0	0	0	0	0	0	6.38134	0	2.82587	0	0	0	0	0	0	0	0	0	0	0	0	0	0	0	0	0	0	0	0	0	0	0	0
ENSG00000021776	aquarius intron-binding spliceosomal factor [Source:HGNC Symbol;Acc:29513]	15	35147732	35262040	AQR	protein_coding	0	0	0	0	0	0	4.76941	0	1.43846	7.37804	0.786113	2.45498	0	6.96309	0	6.03297	0	0	0	0	1.22942	0	6.71861	7.71194	2.05339	8.56316	5.75143	4.43859	6.96642	3.78479	1.91543	7.0572	0	3.07958	0	0	1.85325	0	0	0.653344	5.29341	0	3.95244
ENSG00000105750	zinc finger protein 85 [Source:HGNC Symbol;Acc:13160]	19	21106028	21133503	ZNF85	protein_coding	2.33765	1.90611	3.74908	0	3.90511	1.3226	2.12689	2.46874	0	2.33663	2.82627	1.41736	0.515349	0	0.567684	0	0	3.34773	1.09893	0.636029	1.6406	8.57767	6.28609	0.36897	6.80169	2.71237	1.11484	1.42455	2.51642	2.63046	3.34319	3.07996	1.9466	0	8.40562	1.28026	0	0	0.646376	2.37815	0	0	6.23032
ENSG00000198522	GPN-loop GTPase 1 [Source:HGNC Symbol;Acc:17030]	2	27851114	27874375	GPN1	protein_coding	0	0	0	4.88339	2.66136	0	4.13423	2.29276	0	0	4.67978	4.62281	0	7.82161	8.48724	0	0	7.25111	0	6.5635	7.81312	5.66412	5.1114	7.40469	5.63	6.51558	1.18523	0	0	7.10171	0	0	0	4.34905	8.55971	0	0	0	0	3.26185	8.13533	0	4.81217
ENSG00000110955	ATP synthase, H+ transporting, mitochondrial F1 complex, beta polypeptide [Source:HGNC Symbol;Acc:830]	12	57031959	57039798	ATP5B	protein_coding	10.6914	5.30443	7.54318	8.53183	9.63049	8.53087	9.00485	7.09505	10.1689	8.25369	10.1854	9.63834	9.32183	10.7189	8.55125	11.2631	6.43682	8.38992	10.348	8.10936	9.28138	7.67768	8.6578	10.2562	8.54467	7.82802	9.40677	9.2659	7.80198	9.61433	10.5531	7.54292	8.38471	9.88285	9.42958	9.53193	10.7667	9.77867	9.45219	5.5492	7.17688	7.46841	7.44934
ENSG00000166974	microtubule-associated protein, RP/EB family, member 2 [Source:HGNC Symbol;Acc:6891]	18	32556892	32723434	MAPRE2	protein_coding	7.24858	4.51386	2.8086	0	5.04255	8.10035	5.69916	7.4919	3.12042	4.39104	1.2921	7.63713	7.47401	0	0	4.77062	6.91436	3.66738	3.92704	7.71137	1.88341	7.55314	0	4.6713	6.57779	2.13536	0	8.09421	0.557475	6.33521	6.41408	7.77226	8.63015	7.4989	5.81082	3.07188	0	9.54336	5.9732	0	6.3031	0	5.34718
ENSG00000070081	nucleobindin 2 [Source:HGNC Symbol;Acc:8044]	11	17229700	17371521	NUCB2	protein_coding	7.06418	8.59527	6.57574	9.78913	7.7156	7.86862	8.80071	9.14152	9.0291	8.81912	8.6434	8.3298	7.527	9.66761	8.75894	7.60362	7.61763	6.87512	6.93411	7.62315	8.6821	7.03099	6.01101	8.50744	7.96171	8.48244	7.38982	8.58215	8.5958	8.47263	9.23796	8.45502	8.97824	8.84073	9.3986	5.0669	6.69191	9.34067	9.39548	8.92185	4.98204	9.20882	9.43968
ENSG00000204385	solute carrier family 44, member 4 [Source:HGNC Symbol;Acc:13941]	6	31830969	31846823	SLC44A4	protein_coding	2.62149	5.07023	0	0.780866	1.62476	0.980128	1.71937	7.56227	0.699787	6.59531	1.13679	4.77122	0	1.04802	1.92678	0.60968	2.35378	6.62043	0.861663	1.3794	2.52278	0	1.22092	0.696659	2.40708	3.14756	1.3457	0	2.28887	2.70508	5.37898	1.88258	2.44543	0.740564	1.56544	0.652168	4.37843	0.894402	3.0368	1.82041	2.22306	0.667863	1.40544
ENSG00000111859	neural precursor cell expressed, developmentally down-regulated 9 [Source:HGNC Symbol;Acc:7733]	6	11183531	11382581	NEDD9	protein_coding	0.773462	5.53942	0	0	4.4307	2.16451	2.96773	2.81337	1.99749	4.16865	1.19044	0.885734	3.72614	3.44221	3.40586	0.794809	7.61959	3.30687	2.30703	7.97039	7.2003	0	0.799932	6.3983	6.80795	2.23752	7.53795	0.550255	6.12449	2.06891	6.24509	1.25107	3.63839	6.65805	4.42678	7.10379	3.5258	1.18092	0.579738	1.81102	3.18133	0	1.54823
ENSG00000197563	phosphatidylinositol glycan anchor biosynthesis, class N [Source:HGNC Symbol;Acc:8967]	18	59710800	59854351	PIGN	protein_coding	0	0.655252	0	0	6.50591	1.83562	0	5.68114	0	0	9.466	0	0	0	0	6.16919	0	0	1.59939	0	1.59316	4.95619	0	0	0	0	2.75125	0	1.91231	2.01561	0	0	6.81323	8.55012	7.48373	0	3.27954	10.5129	0	3.70366	0	0	5.287
ENSG00000174718	KIAA1551 [Source:HGNC Symbol;Acc:25559]	12	32112304	32146039	KIAA1551	protein_coding	5.35216	7.84788	5.74737	0	5.74409	5.34482	1.76063	0.475076	4.14369	0	9.63606	2.34355	0	0	4.25992	4.22116	0	1.81078	7.50528	0	0	6.49243	7.46387	8.76467	3.6256	0	0	0	0	0	1.68608	0	4.03155	0	0	0	0	0	0	0	6.46164	3.28971	3.23395
ENSG00000024048	ubiquitin protein ligase E3 component n-recognin 2 [Source:HGNC Symbol;Acc:21289]	6	42531800	42661242	UBR2	protein_coding	6.11115	3.47856	0	0	3.77153	8.15154	7.40438	7.69865	0.483001	8.38046	8.3225	0.501517	1.78015	7.78037	5.99132	9.39019	7.80205	6.47126	4.42962	0.427105	6.7715	2.81024	8.60012	0.225312	8.58741	8.51689	2.76077	8.60044	1.27488	2.39532	0.846721	5.01797	7.65645	8.07335	7.88823	9.71476	0.521576	1.17824	0	7.01468	7.26627	5.95274	3.36466
ENSG00000168538	trafficking protein particle complex 11 [Source:HGNC Symbol;Acc:25751]	4	184580420	184634745	TRAPPC11	protein_coding	0	5.82575	0	0	2.50093	0	3.50057	0	0	8.35621	2.60192	0	0	6.26604	0	0	5.83835	0	5.43047	0	0	0	1.95522	0.784712	1.17652	0	0	0	6.16498	0	0	0	0.315592	0	6.85877	0	1.66794	0.506906	3.46065	0	0	6.9471	0.552999
ENSG00000111752	polyhomeotic homolog 1 (Drosophila) [Source:HGNC Symbol;Acc:3182]	12	9066492	9094063	PHC1	protein_coding	4.89318	0	0	1.93948	1.52148	0.481709	0	6.46459	0	0	0.705091	6.7027	0	0	0	10.0482	1.97156	0	4.3446	0	2.18162	1.07646	6.67621	0	8.28276	4.3384	0	0.985023	8.06103	1.42224	4.96429	3.25349	2.09224	5.99469	4.01774	2.96252	0	0	2.13661	0.798196	9.46249	0.736545	0.67198
ENSG00000067646	zinc finger protein, Y-linked [Source:HGNC Symbol;Acc:12870]	Y	2803112	2850547	ZFY	protein_coding	8.00898	7.54712	5.35896	0.611701	0	6.02358	0	0	0	3.24672	0	0	0	6.06094	0	0.44384	6.89468	8.93382	0	0	0	0	5.49809	0.36897	1.53131	0.646696	1.54151	0	0	2.21792	0	0	0	0	0	1.8663	0	0	0	6.38344	0	0	1.47497
ENSG00000136167	lymphocyte cytosolic protein 1 (L-plastin) [Source:HGNC Symbol;Acc:6528]	13	46700055	46786006	LCP1	protein_coding	0	0	0	0	0	0	0	0	0	0	0	0	0	0	0	0	0	0	0	0	0	0	0	0	0	0	0	0	0	0	0	0	0	0	0	0	0	0	0	0	0	0	0
ENSG00000259976		3	114033348	114035026	RP11-553L6.5	lincRNA	1.46023	0	0	1.03992	3.16823	0	0	0	0	4.24665	1.2921	0	0	3.24778	0	0	2.09369	2.11916	7.32978	0	0	3.43725	0	0	0	0	1.54151	0.883044	1.9374	0	0	0	1.71133	0	7.27629	2.52675	2.99428	3.47301	1.74637	0	2.48183	0.600669	0
ENSG00000119772	DNA (cytosine-5-)-methyltransferase 3 alpha [Source:HGNC Symbol;Acc:2978]	2	25455845	25565459	DNMT3A	protein_coding	4.46063	0	3.84265	0.611701	2.50093	5.76075	5.84617	6.95242	0	7.07548	6.74319	1.39517	0	3.93942	0	0	7.52379	0	6.77627	0	1.22942	7.82048	7.3348	1.60408	4.67673	4.92648	6.7804	6.20176	1.27207	6.65574	4.14025	0	0	7.78226	0	1.64005	0	0.506906	8.56381	6.64524	0	0	5.13343
ENSG00000198961	praja ring finger 2, E3 ubiquitin protein ligase [Source:HGNC Symbol;Acc:17481]	5	108670410	108745695	PJA2	protein_coding	9.58938	4.97587	7.27756	9.2448	9.60358	7.13415	7.25049	6.97496	6.91043	8.41862	9.54176	8.53232	8.26727	10.564	5.88832	9.27998	8.83895	9.24398	7.43931	7.07278	7.46342	10.3074	7.51015	1.45869	8.29549	9.69524	8.15855	4.89263	9.88034	9.0213	9.08548	6.22412	8.60929	8.02452	10.2036	3.59849	7.13753	8.69055	9.20116	3.26185	1.33838	3.21143	8.99088
ENSG00000143954	regenerating islet-derived 3 gamma [Source:HGNC Symbol;Acc:29595]	2	79252812	79255631	REG3G	protein_coding	0	0	0	0	0	0	0	0	0	0	0	0	0	0	0	0	0	0	0	0	0	0	0	0	0	0	0	0	0	0	0	0	0	0	0	0	0	0	0	0	0	0	0
ENSG00000116209	transmembrane protein 59 [Source:HGNC Symbol;Acc:1239]	1	54497347	54519177	TMEM59	protein_coding	9.01597	9.97825	11.2645	10.1259	8.83625	8.80192	8.68586	9.88113	8.50276	8.9619	9.8483	9.42922	8.72887	9.93034	8.03416	9.88877	8.75201	9.01279	8.76468	9.8565	9.1006	6.63404	9.83985	9.70878	10.0925	10.4101	9.0527	8.91611	8.85126	10.3816	10.2736	0	8.63622	10.0051	9.56228	4.77924	9.8898	6.99528	10.687	6.11363	10.7514	8.59916	9.78588
ENSG00000067369	tumor protein p53 binding protein 1 [Source:HGNC Symbol;Acc:11999]	15	43699407	43802926	TP53BP1	protein_coding	2.02331	7.83704	9.78771	3.93146	9.72318	8.86315	6.50725	8.86258	8.84752	4.52228	7.79408	7.78308	0	4.91721	0	3.8766	8.48344	7.9276	6.35223	5.85303	8.22979	0	0.781936	5.20344	8.41483	9.24627	7.23549	7.79295	7.25184	7.35872	8.23076	6.25203	0	7.46684	7.08577	3.77617	5.72321	0	9.28661	4.13845	9.2621	0.600669	6.59637
ENSG00000127955	guanine nucleotide binding protein (G protein), alpha inhibiting activity polypeptide 1 [Source:HGNC Symbol;Acc:4384]	7	79763271	79848718	GNAI1	protein_coding	6.57867	7.21113	8.59016	2.6509	6.8436	0	5.35077	0.475076	0	7.43745	8.05013	5.47923	0	2.65807	6.88376	0	8.1433	5.23988	0.592192	3.85817	8.73449	2.09673	8.26435	3.10051	5.88202	2.60649	9.33032	8.82906	3.96555	5.92251	8.74122	3.17518	6.51438	1.57901	4.37689	7.75036	8.14577	0	6.17478	6.13566	0	5.85315	4.33288
ENSG00000115760	baculoviral IAP repeat containing 6 [Source:HGNC Symbol;Acc:13516]	2	32582096	32843966	BIRC6	protein_coding	6.8436	7.0326	7.63322	6.45289	4.1946	7.70557	7.06564	5.65904	6.30048	7.43329	6.40995	4.30359	7.62929	6.19459	9.5009	4.88056	9.68989	0	8.09028	9.5092	7.36093	0	5.5337	3.32688	7.92843	8.48333	8.11612	8.79244	9.58313	7.27614	5.27436	1.97123	5.59092	0	5.68202	2.77001	10.0471	8.33003	9.04429	8.45292	3.1116	0	4.78798
ENSG00000104368	plasminogen activator, tissue [Source:HGNC Symbol;Acc:9051]	8	42032236	42065242	PLAT	protein_coding	4.43165	5.30212	3.07281	4.5569	4.2537	3.58629	5.12319	4.58951	4.54003	4.92517	3.09261	4.36479	4.83738	5.03104	3.81626	3.16769	5.62944	5.83718	8.12143	3.37595	5.15271	9.50112	5.58758	3.49031	4.92465	4.73907	5.24781	3.01721	4.26747	4.96618	4.69645	6.26291	4.06967	4.16148	4.95422	4.31259	3.1735	4.51677	5.52229	4.68528	5.17081	2.75661	4.92029
ENSG00000137819	progestin and adipoQ receptor family member V [Source:HGNC Symbol;Acc:29645]	15	69591286	69700119	PAQR5	protein_coding	0	0	0	0	0	0	1.76063	0	0	0	0	0	0	0	0	0	0	0	0	0	0	0	1.29046	0	0	0	0	0	0	0	0	0	0.64953	0	0	0	0.407779	0	0	0	0	0	0
ENSG00000133026	myosin, heavy chain 10, non-muscle [Source:HGNC Symbol;Acc:7568]	17	8377523	8534079	MYH10	protein_coding	0.523944	7.77781	2.11659	6.52911	8.16636	7.97547	6.37511	8.79957	5.39395	6.82521	7.99589	7.77236	3.96791	0	9.32685	5.76321	8.13996	3.66738	0	7.1599	9.32741	9.31225	7.3348	0	7.84786	4.49134	7.87124	7.51188	0	3.65138	8.03728	4.80836	1.0958	1.57901	5.4643	4.16464	5.2651	1.17824	0	4.39564	0	3.74352	7.81521
ENSG00000157017	ghrelin/obestatin prepropeptide [Source:HGNC Symbol;Acc:18129]	3	10327359	10334631	GHRL	protein_coding	0	0	0	0	0	0	0	0	0	0	0	0	0	0	0	0	0	0	0	0	0	0	0	0	0	0	0	0	0	0	0	0	0	0	0	0	0	0	0	0	0	0	0
ENSG00000003056	mannose-6-phosphate receptor (cation dependent) [Source:HGNC Symbol;Acc:6752]	12	9092959	9102551	M6PR	protein_coding	7.92158	3.35025	5.74737	4.61867	1.92206	5.16345	6.11831	0	0	3.99874	6.51801	7.83509	6.18438	1.37494	0	6.22034	6.58691	0	8.26454	5.29197	8.35577	3.70052	4.00972	5.99226	2.09441	8.29354	7.48158	6.9944	5.78591	9.03181	7.62609	5.34555	7.0375	8.43087	9.26458	6.8766	5.7468	0	3.81646	4.6376	7.37788	0	4.10631
ENSG00000165646	solute carrier family 18 (vesicular monoamine transporter), member 2 [Source:HGNC Symbol;Acc:10935]	10	119000604	119038941	SLC18A2	protein_coding	8.46554	3.64361	0	6.77152	0.736204	7.02454	8.28678	8.1385	0	0	5.11627	4.49826	9.64491	8.01769	7.80679	10.0061	0	0	0	7.76485	6.69866	7.28155	7.24186	8.09225	5.51542	0	8.83634	7.82821	0	6.9887	6.11265	4.56304	0	3.23993	0	2.06183	0	8.41434	9.30418	0	6.55841	8.88414	7.89948
ENSG00000135535	CD164 molecule, sialomucin [Source:HGNC Symbol;Acc:1632]	6	109687717	109703762	CD164	protein_coding	8.76322	9.11691	10.9497	8.21506	8.54885	7.64866	9.60667	8.3325	6.12599	8.27481	7.05368	8.95647	8.27734	9.62246	9.15527	9.86277	9.66572	9.07995	7.3746	9.12491	8.75798	8.00051	9.18741	8.57374	9.47428	5.50312	8.58674	11.1538	7.16441	7.86946	8.43408	4.26836	8.90803	7.96264	8.62928	9.36598	8.20446	10.5948	9.28525	5.63485	4.6701	6.71859	7.34878
ENSG00000197013	zinc finger protein 429 [Source:HGNC Symbol;Acc:20817]	19	21679484	21739072	ZNF429	protein_coding	8.20749	7.34255	1.02458	4.20367	2.91291	0.809349	7.97173	1.35612	0.543505	3.19021	1.96262	2.75151	1.37356	3.16903	6.96309	6.48855	6.02037	2.12194	4.19552	2.99791	7.92296	1.81481	6.99132	0.355889	8.00138	0.615081	0.803466	8.26726	0	2.95543	2.46435	2.55715	4.34827	4.96725	7.05463	0	0	5.627	6.96215	0.658589	3.04902	0.270909	4.84842
ENSG00000006071	ATP-binding cassette, sub-family C (CFTR/MRP), member 8 [Source:HGNC Symbol;Acc:59]	11	17414432	17498449	ABCC8	protein_coding	9.74987	7.86577	4.19777	7.72585	5.35569	8.25914	8.59373	8.81714	2.51181	10.8539	10.1894	3.31703	0	10.053	5.57437	10.0172	9.35608	9.30437	0	0	6.06375	0	4.8247	7.49136	9.61292	9.40754	8.41429	7.68463	10.2238	11.1174	5.16713	7.64645	8.33984	11.1142	9.99491	9.88187	5.09169	6.62457	11.7551	5.80709	10.8078	6.34065	7.1314
ENSG00000101126	activity-dependent neuroprotector homeobox [Source:HGNC Symbol;Acc:15766]	20	49505585	49547958	ADNP	protein_coding	6.53165	3.42937	5.23662	10.3682	0	7.90653	8.4566	4.53789	6.83679	7.3737	3.84818	6.83152	4.62877	8.10656	7.71088	2.75777	0	0	1.59939	0	0	9.04769	7.24186	5.6511	5.92754	7.54748	8.55043	5.1882	4.8729	7.18855	2.82761	4.42272	8.41146	2.57752	8.92607	3.32139	8.08228	4.4627	6.81096	7.94011	7.0824	0	8.54601
ENSG00000153113	calpastatin [Source:HGNC Symbol;Acc:1515]	5	95860971	96115299	CAST	protein_coding	9.55899	5.05285	5.51301	8.84247	5.68501	7.34109	5.37865	7.94268	4.59798	7.20875	8.6451	5.10463	8.61081	9.77444	5.47327	7.13134	9.76402	5.9985	7.02967	9.53296	4.43976	5.64849	3.33023	7.40501	7.1069	8.96042	6.02786	5.36175	7.65066	7.43454	7.54943	6.98418	5.28279	8.19076	6.77425	4.58329	5.41988	9.11753	8.01532	6.99084	7.93118	5.60023	7.84407
ENSG00000139329	lumican [Source:HGNC Symbol;Acc:6724]	12	91496406	91505608	LUM	protein_coding	0	0	0	0	0	0	0	0	0	0	0	0	0	0	0	0	0	0	11.1389	0	0	11.3275	0	0	0	0	0	0	0	0	0	0	0	0	0	0	0	0	0	0	0	0	0
ENSG00000168310	interferon regulatory factor 2 [Source:HGNC Symbol;Acc:6117]	4	185308867	185395734	IRF2	protein_coding	4.59739	0	0	2.05948	4.1946	0	6.81329	0	0	0	3.10542	0	4.29931	0	2.04642	6.19069	7.05574	1.41803	0	0	5.16844	0.633845	0	0	1.17652	0	1.54151	0	0	1.49882	0	1.67391	6.12531	1.57901	0	0.61277	5.92283	0	0	4.57969	0	5.59746	0
ENSG00000131171	SH3 domain binding glutamic acid-rich protein like [Source:HGNC Symbol;Acc:10823]	X	80457442	80554046	SH3BGRL	protein_coding	6.43274	6.86484	6.03851	3.24016	6.37316	8.49022	7.35942	0	0	6.91156	4.67978	1.15228	2.9196	1.37494	5.08208	0	0	1.81078	5.96375	7.04253	7.36093	6.59381	0	0	6.93062	8.67917	9.64349	6.32842	6.456	2.39532	5.66961	3.96395	5.84039	8.83814	8.36112	8.7201	0	4.59425	7.59643	6.45112	2.02054	6.1334	6.63757
ENSG00000157020	SEC13 homolog (S. cerevisiae) [Source:HGNC Symbol;Acc:10697]	3	10334815	10362862	SEC13	protein_coding	5.73085	5.24005	6.00892	8.23838	0	6.62933	4.72667	4.24333	0	6.59858	0	4.49826	0	5.57727	3.24079	0	9.32554	0	7.99304	7.90315	6.35198	9.31473	0	8.28789	5.36912	3.15674	5.55041	7.78745	0	2.39532	7.415	0	2.74127	0	6.58927	8.30319	0.903844	7.93024	3.60726	6.95599	2.02054	6.7115	6.9027
ENSG00000122126	oculocerebrorenal syndrome of Lowe [Source:HGNC Symbol;Acc:8108]	X	128673826	128726538	OCRL	protein_coding	0	2.75466	0	0	0.736204	0	3.16375	1.35612	0	1.58407	3.91898	1.94593	0	0	0.701468	1.05704	1.20624	0	0	0	6.76259	0	3.64512	2.9454	6.13581	4.92648	7.44513	8.02341	2.10495	2.82518	0	0	5.26796	0	4.9802	2.6535	3.27954	0	0	4.09074	3.72568	0	0
ENSG00000100220	RNA 2',3'-cyclic phosphate and 5'-OH ligase [Source:HGNC Symbol;Acc:26935]	22	32783569	32808242	RTCB	protein_coding	5.90963	2.15359	7.27756	5.88476	6.81829	1.30342	2.88152	0	0	4.49057	8.41718	3.68021	6.11248	2.98285	8.50475	10.5606	6.05241	6.40277	0	4.65595	0	8.20128	5.15109	8.9639	5.57385	9.03075	6.39997	5.98813	6.34318	9.2155	8.11723	4.91697	8.94012	0	6.05143	0.61277	0	0	0	1.10139	0	6.02317	0
ENSG00000061676	NCK-associated protein 1 [Source:HGNC Symbol;Acc:7666]	2	183773843	183903586	NCKAP1	protein_coding	8.293	9.53646	5.61613	7.7649	7.21728	7.46005	0	5.1739	5.28742	3.90563	9.35808	7.1745	7.30458	8.93574	0	9.01356	4.27075	8.83767	8.79467	7.58063	1.22942	7.5781	3.46886	8.99142	8.01884	6.86267	6.67642	7.30408	7.20649	5.56259	8.58751	8.15517	2.14141	3.69219	5.32026	5.91336	5.3133	6.30168	7.9107	0.653344	4.58076	4.50396	5.88079
ENSG00000172023	regenerating islet-derived 1 beta [Source:HGNC Symbol;Acc:9952]	2	79312156	79315145	REG1B	protein_coding	0	0	0	0	0	0	0	0	0	0	0	0	2.01101	0	0	0	0	0	0	0	0	0	0	0	0	0	0	0	0	0	0	0	0	0	0	0	0	0	0	0	0	0	0
ENSG00000125851	proprotein convertase subtilisin/kexin type 2 [Source:HGNC Symbol;Acc:8744]	20	17206752	17465223	PCSK2	protein_coding	9.20548	10.4137	10.1525	9.1793	9.32078	8.9535	10.9013	10.4913	9.57382	10.0858	3.88401	10.5476	9.16946	8.69256	10.8093	8.70532	9.1884	9.53435	1.01808	10.458	10.31	0	8.67059	10.038	9.64276	8.56962	10.8883	10.0615	8.01697	7.09196	9.69391	9.20726	10.0048	9.13451	9.05358	11.3693	10.0875	8.96666	1.12272	9.29408	7.66381	11.288	9.77006
ENSG00000073350	lethal giant larvae homolog 2 (Drosophila) [Source:HGNC Symbol;Acc:6629]	17	73521161	73571289	LLGL2	protein_coding	3.86405	5.7402	2.32885	2.72421	1.73851	3.63612	5.20176	7.10497	3.90143	4.21673	5.58965	7.15103	4.06035	4.23389	3.16426	4.1312	4.69916	3.92652	3.15171	2.11556	6.06665	2.23372	4.41879	1.71325	4.19062	3.73595	5.34168	3.74213	2.78776	3.48331	4.79396	5.63753	4.28739	4.26765	3.61949	6.58783	2.83786	9.15841	8.21609	3.9699	3.58022	8.17705	3.50957
ENSG00000116001	TIA1 cytotoxic granule-associated RNA binding protein [Source:HGNC Symbol;Acc:11802]	2	70436576	70475792	TIA1	protein_coding	8.05958	5.10197	7.23346	5.24657	4.92099	0.794161	5.45918	3.20004	7.03325	4.75359	6.43432	3.05934	3.18296	0	7.70223	6.53132	0	6.92362	7.73572	4.11232	3.63578	3.57588	3.64512	7.45827	6.16144	8.42755	1.18523	0.883044	8.57791	9.04311	5.07522	0	7.2122	1.57901	3.32039	2.87781	2.01744	4.08729	7.82714	0.653344	9.1617	0	3.76687
ENSG00000115386	regenerating islet-derived 1 alpha [Source:HGNC Symbol;Acc:9951]	2	79347488	79350545	REG1A	protein_coding	1.21017	0	8.71225	0	4.08567	0	5.13893	0	0	0	0	0	0	0	0	0	0	0	0	0	0	0	5.87172	0	0	0	1.54151	0	0	0	0	0	0	0	0	0	0	1.17824	0	0	0	0	0
ENSG00000147955	sigma non-opioid intracellular receptor 1 [Source:HGNC Symbol;Acc:8157]	9	34634719	34637806	SIGMAR1	protein_coding	6.71119	0.655252	0	0	8.46978	1.30342	0	0	0	0	3.98647	0	0	0	0	0	0	0	1.01083	0	0	0	0	0	0	0	0	5.1544	0	0	1.91543	0	0	0.581988	0.677432	0	8.57445	0	1.12272	0	4.75422	0	0
ENSG00000125691	ribosomal protein L23 [Source:HGNC Symbol;Acc:10316]	17	37004118	37010096	RPL23	protein_coding	8.06817	6.67579	7.32036	8.70105	9.22192	8.12715	7.8724	6.83983	7.62081	7.15939	9.0119	8.00546	7.35842	7.43882	7.61967	8.81183	6.54177	7.1185	9.99881	8.43295	7.63919	8.37274	8.72115	8.46724	7.56062	8.33794	7.22121	7.32702	9.3117	8.50944	8.6506	8.52767	8.59879	8.51072	9.17394	9.16918	8.76125	8.9111	9.22126	4.99692	9.2478	8.0323	7.83604
ENSG00000125868	destrin (actin depolymerizing factor) [Source:HGNC Symbol;Acc:15750]	20	17550508	17590564	DSTN	protein_coding	8.7977	9.17397	7.12038	9.35826	8.55397	8.45745	7.7332	9.60482	5.05557	9.06473	7.58679	6.33771	8.52043	8.30376	7.24702	9.68226	8.53266	7.60102	8.46239	9.03941	8.58083	8.76028	7.25551	9.51609	8.61592	7.16517	8.27587	8.57972	8.2039	7.69593	8.95295	5.56839	7.00427	8.35522	8.95946	7.26619	5.77002	10.9033	9.14974	4.9708	7.23659	8.3729	8.40004
ENSG00000051382	phosphatidylinositol-4,5-bisphosphate 3-kinase, catalytic subunit beta [Source:HGNC Symbol;Acc:8976]	3	138372860	138553780	PIK3CB	protein_coding	3.52471	2.75466	4.03111	4.43258	0	5.00889	0	5.57891	0	4.32065	0	0.86005	0	2.06596	8.23778	0.782777	0	0	2.60297	4.07295	0	0	5.57783	0	3.9536	0	0	0	8.2471	0	0	1.97123	0	0	5.74786	5.50628	3.27954	0	2.51356	3.70366	0	9.05355	0
ENSG00000136143	succinate-CoA ligase, ADP-forming, beta subunit [Source:HGNC Symbol;Acc:11448]	13	48510622	48612125	SUCLA2	protein_coding	8.27476	5.57186	0	4.39686	8.89997	3.06017	0	4.51346	9.01374	6.30245	7.28229	1.15228	7.66204	0.614652	8.46293	9.19166	0	9.25798	5.13803	0	3.32138	9.31348	1.65915	6.30732	0	6.82639	0	9.35006	3.92131	7.48663	0.63125	0	6.13701	0	6.58927	0.884956	0	0	2.37469	0	0	0	5.13343
ENSG00000143393	phosphatidylinositol 4-kinase, catalytic, beta [Source:HGNC Symbol;Acc:8984]	1	151264273	151300191	PI4KB	protein_coding	4.37188	3.88727	1.22322	0	8.65512	0	2.0651	0	0	0	9.62419	3.19393	0	7.50465	0	0	0	0.876649	6.65799	4.03248	2.12493	4.76655	0	0.662535	0	0	5.24587	2.78865	2.9267	0	1.41324	2.77443	0	3.84966	3.40445	0	0	0	0	4.13845	0	0	0
ENSG00000100225	F-box protein 7 [Source:HGNC Symbol;Acc:13586]	22	32870663	32894818	FBXO7	protein_coding	7.78441	7.15707	7.97298	0	6.55914	1.58512	3.0097	6.30887	0	7.03791	8.51756	6.9153	2.91478	6.37577	2.05188	0.507371	4.45359	7.56095	6.4806	2.09055	7.80325	4.11449	8.35976	7.73675	5.36648	9.97683	6.5696	2.31635	6.63749	4.50889	3.85807	4.8673	7.28213	5.89629	1.90948	4.07235	2.42095	6.46184	4.28493	2.91046	4.35042	8.61428	3.952
ENSG00000198478	SH3 domain binding glutamic acid-rich protein like 2 [Source:HGNC Symbol;Acc:15567]	6	80341000	80413372	SH3BGRL2	protein_coding	7.92829	3.17768	8.4973	0	9.32228	6.06751	7.35942	0	4.59032	3.85673	4.97387	7.65766	6.59193	8.62817	8.25118	9.40176	7.71096	7.72016	0	7.62554	7.4689	8.96179	6.85935	1.73615	0	7.36152	0	8.35078	6.08704	5.84823	8.1542	0	5.37068	0	0.677432	5.58791	0	0.881272	7.15883	6.4031	1.33838	3.04087	8.50394
ENSG00000172016	regenerating islet-derived 3 alpha [Source:HGNC Symbol;Acc:8601]	2	79384132	79386879	REG3A	protein_coding	0	0	0	0	0	0	0	0	0	0	0	0	0	0	0	0	0	0	0	0	0	0	0	0	0	0	0	1.82081	0	0	0	0	0	0	0	0	0	0	0	0	0	0	0
ENSG00000137818	ribosomal protein, large, P1 [Source:HGNC Symbol;Acc:10372]	15	69745123	69748255	RPLP1	protein_coding	8.93955	7.94535	9.27213	8.0003	9.53895	8.44687	8.13161	7.61016	8.07653	8.15863	9.75514	8.8942	8.26258	7.41773	9.08186	8.3063	7.81094	7.95217	10.4063	8.89309	8.36244	9.01358	8.38298	8.56822	8.78826	7.6756	8.7366	8.54427	9.65917	9.00469	8.58988	8.98822	7.72385	9.40152	9.03721	9.45898	8.28434	9.31067	8.72304	8.61133	8.59051	9.6166	8.83298
ENSG00000165169	dynein, light chain, Tctex-type 3 [Source:HGNC Symbol;Acc:11694]	X	37696010	37706890	DYNLT3	protein_coding	8.39973	4.9565	5.81768	8.8795	8.37169	5.42095	8.48011	5.84769	6.13532	6.1681	9.73764	5.88151	6.94669	8.36967	5.61724	7.72507	2.59138	8.14773	7.50201	7.80454	7.50262	7.82362	9.51815	9.01592	7.23379	5.67857	7.36255	8.88938	8.88777	5.52494	8.4001	2.49309	9.24539	5.43851	8.58476	2.98101	1.63797	6.18981	8.33512	6.76512	1.549	8.53611	6.92533
ENSG00000167232	zinc finger protein 91 [Source:HGNC Symbol;Acc:13166]	19	23487793	23578362	ZNF91	protein_coding	5.26663	7.68401	8.44784	3.83866	7.54109	9.08088	2.99248	2.84191	6.61516	5.8901	9.59308	3.31762	5.35308	4.33152	3.40969	2.99658	6.4565	6.03869	0.572632	2.24731	8.6925	1.9976	10.4808	0	6.27954	9.3658	5.73272	9.67954	8.80441	5.76654	8.4771	3.36506	6.16244	7.64348	8.4149	7.12533	7.06412	6.64971	5.9667	7.74081	9.28345	3.19363	6.35114
ENSG00000136436	calcium binding and coiled-coil domain 2 [Source:HGNC Symbol;Acc:29912]	17	46908350	46943884	CALCOCO2	protein_coding	8.77656	6.63882	3.6764	4.01299	6.69086	9.7373	8.14404	5.21447	9.3216	5.08594	3.84927	7.43645	6.02655	5.91171	7.56146	4.61962	8.9871	8.1092	8.78914	9.26987	7.54063	7.84025	9.4534	7.92601	7.1719	7.55066	8.31768	9.18772	8.46198	5.54182	8.22481	8.44834	8.52817	6.00477	9.17423	8.369	6.51015	11.6035	5.72748	8.3689	8.56237	7.13607	4.78774
ENSG00000156976	eukaryotic translation initiation factor 4A2 [Source:HGNC Symbol;Acc:3284]	3	186500994	186507689	EIF4A2	protein_coding	10.6233	8.91859	7.00519	9.05447	10.4633	6.22446	8.78553	9.60482	8.65742	7.56464	10.5877	8.59752	9.35337	9.55885	7.48244	11.1256	10.1936	8.84556	7.94036	9.08712	9.18135	9.19614	2.20075	8.25387	9.07957	10.5047	9.56316	9.35695	11.0852	10.4416	7.45658	7.4794	7.31882	9.75677	10.769	9.77177	1.45528	10.2702	11.3877	9.5053	8.76028	9.00652	9.33772
ENSG00000127831	villin 1 [Source:HGNC Symbol;Acc:12690]	2	219283815	219318018	VIL1	protein_coding	2.74254	4.77545	0.737545	0	6.22219	0.447171	4.08093	0	0	7.68032	0.457413	2.65493	0	0	0	0	2.36664	1.20434	0	0	3.85273	0	2.5177	8.04528	7.48519	0.625696	0.722238	0	0.557475	0.542533	0	1.29896	0	2.54717	0.267546	0	0.258199	5.11603	0	0.532857	1.33838	0	0
ENSG00000160551	TAO kinase 1 [Source:HGNC Symbol;Acc:29259]	17	27717482	27878922	TAOK1	protein_coding	8.20156	9.88579	4.23965	7.714	7.68652	5.86355	6.94255	4.68162	4.23791	5.718	9.80979	6.94677	4.48714	7.27347	8.49647	7.56215	6.2886	8.20886	7.73572	8.59934	7.82844	6.52788	6.98363	7.2018	9.10669	6.08827	8.16087	5.29661	8.75724	6.056	7.35875	6.45228	5.69546	7.92944	7.73811	5.21526	6.51118	4.60152	8.88159	7.65649	8.29489	7.80922	8.2503
ENSG00000125629	insulin induced gene 2 [Source:HGNC Symbol;Acc:20452]	2	118846028	118868573	INSIG2	protein_coding	0.523944	3.35025	0	4.07397	0	0	0	2.1731	0	8.47236	0	0	1.81784	0	0.95549	0	0	0	4.22988	0	0	6.17013	0	0	7.40303	0	0	0	3.56668	3.15593	0	0	4.21943	0	0	0	4.76189	0	3.46065	0	0	0	0
ENSG00000165678	growth hormone inducible transmembrane protein [Source:HGNC Symbol;Acc:17281]	10	85899196	85913001	GHITM	protein_coding	9.04257	3.64361	8.9312	8.70976	6.56797	8.77282	7.14082	4.67635	6.00634	8.39954	7.06535	8.9308	7.41118	9.50608	2.04642	9.4553	7.98853	3.66738	7.11946	9.22146	9.46827	7.14902	8.50047	9.9009	7.46609	7.19888	8.75359	7.98547	5.16612	8.35432	8.54103	4.56304	5.68959	8.13829	9.49455	9.19937	0.521576	10.1631	8.65302	7.88174	5.50245	4.97585	7.54987
ENSG00000075624	actin, beta [Source:HGNC Symbol;Acc:132]	7	5566782	5603415	ACTB	protein_coding	10.9191	7.7239	9.44231	9.1474	9.82092	10.9267	10.2115	10.1033	10.3266	9.55708	10.2361	10.6537	8.56917	6.92576	8.58457	9.95046	12.0778	10.2177	11.9114	11.819	10.3867	12.2023	10.4981	11.195	9.66769	11.1642	10.7947	10.9731	8.90899	11.6652	9.51836	5.92792	10.9954	9.91948	10.2631	10.4138	8.32494	12.4978	9.74046	5.97415	9.92438	10.2933	8.96546
ENSG00000084207	glutathione S-transferase pi 1 [Source:HGNC Symbol;Acc:4638]	11	67351066	67354131	GSTP1	protein_coding	0	5.60632	8.55986	8.61579	7.31099	7.61123	7.03093	6.47164	6.09022	7.15854	3.84818	7.62527	4.18377	2.39218	5.06868	5.63313	8.57531	7.94729	8.86545	8.29617	4.53531	8.5535	8.64748	0.906346	6.29479	4.4169	5.03782	6.87662	7.13566	8.18058	6.9871	8.50175	7.6725	0	4.57125	6.30962	7.67824	0	5.51562	3.34553	2.83081	8.91379	6.46522
ENSG00000165650	PDZ domain containing 8 [Source:HGNC Symbol;Acc:26974]	10	119040000	119134978	PDZD8	protein_coding	9.07218	8.40835	7.61433	7.14208	6.07394	6.58556	7.96292	7.58826	7.20822	6.34554	8.32396	7.00029	7.67736	8.02326	1.35035	8.93389	8.5998	7.47346	7.4439	7.71265	8.69149	7.73939	9.65569	6.8675	8.83806	7.44935	8.91046	7.35994	7.84141	8.39441	8.83117	8.99494	6.12072	7.82139	8.54005	5.75584	7.66391	9.67295	8.16462	2.85214	5.22134	8.89385	7.14703
ENSG00000123612	activin A receptor, type IC [Source:HGNC Symbol;Acc:18123]	2	158383279	158485517	ACVR1C	protein_coding	0	0	4.2493	1.03992	0	0	0	0	0	1.32112	0	0	0	0	0.392954	0	0	0	0	0	0.741889	0	6.48367	0	2.73799	5.14976	0	0	0	0.685898	4.35091	0	2.31632	0	2.67663	0	0	8.97875	3.01175	0	0	0	6.21606
ENSG00000100234	TIMP metallopeptidase inhibitor 3 [Source:HGNC Symbol;Acc:11822]	22	33197687	33259030	TIMP3	protein_coding	0	0	0	0	0	0	0	0	0	0	0	0	7.49436	0	0	0	0	0.876649	11.405	0	0	13.9457	0	0	0	0	0	0	0	0	0	0	0	0	0	0	0	0	0	0	0	0	0
ENSG00000136156	integral membrane protein 2B [Source:HGNC Symbol;Acc:6174]	13	48807294	48837063	ITM2B	protein_coding	7.07204	10.0451	9.38154	9.5381	9.13167	8.77766	9.13925	7.7384	7.32631	8.57041	6.49931	8.98054	8.54405	7.32991	9.19512	8.6417	8.55289	4.70505	7.41806	8.62868	8.2712	7.9536	6.62707	6.93007	8.76337	7.70045	8.35659	8.7703	8.08112	8.29404	8.56657	9.02902	7.50647	7.99391	7.42457	7.44771	9.39262	7.37165	7.75426	7.07108	7.91291	8.79972	7.21088
ENSG00000135269	testis derived transcript (3 LIM domains) [Source:HGNC Symbol;Acc:14620]	7	115850547	115898837	TES	protein_coding	7.31994	6.51188	1.49321	0.912159	2.04819	1.29697	5.36701	2.35237	0.633735	6.27219	0.851286	7.02817	2.90897	7.88198	4.99454	1.11337	8.69544	1.44929	2.08168	0.939002	6.10844	1.53921	8.11332	5.80311	3.8312	2.39938	2.13384	0.0885754	3.02611	3.7203	3.48496	3.63897	2.29809	2.00941	3.15456	2.82922	0.521576	1.97767	1.26735	7.34036	3.15681	1.53369	3.38544
ENSG00000134321	radical S-adenosyl methionine domain containing 2 [Source:HGNC Symbol;Acc:30908]	2	7005937	7038370	RSAD2	protein_coding	2.82508	0.69678	0	0	1.58049	1.15676	1.8589	2.46569	2.47123	0	1.68397	0	2.94064	5.34981	1.93153	1.01394	0	2.31368	0	0.949474	2.29467	0.495362	1.71713	1.07349	2.14873	3.84217	0.929442	0	0	0	1.13957	1.31599	5.78463	0	1.48433	2.44359	0	0	0.908649	0.759667	0.618274	0	0.951785
ENSG00000197128	zinc finger protein 772 [Source:HGNC Symbol;Acc:33106]	19	57978031	57988938	ZNF772	protein_coding	1.54277	4.4967	3.07966	0	3.69275	1.73263	5.53719	0.404569	1.52888	2.07279	0.865697	2.24529	2.36936	2.87102	3.59079	0.295063	2.42224	0.843422	3.5096	3.3564	4.19324	1.48675	3.83382	1.54046	1.72525	0.881831	0	4.6374	0.775896	4.05954	3.2721	1.69358	3.92432	5.75344	0.698896	1.90758	1.96208	0	0	2.72542	2.72137	0	1.69074
ENSG00000165322	Rho GTPase activating protein 12 [Source:HGNC Symbol;Acc:16348]	10	32094365	32217742	ARHGAP12	protein_coding	4.69818	6.62544	0	0	4.3905	0	6.54464	6.35276	6.67717	0	4.61728	0.493187	0	8.12863	4.39486	0	0	0.876649	0	0.551476	8.38293	1.0652	0	0.906346	5.32444	0	6.77202	0	0.557475	4.17342	3.72224	0	7.76969	7.37049	5.52189	2.6535	5.80415	0	5.31686	0	1.33838	0	4.03697
ENSG00000090861	alanyl-tRNA synthetase [Source:HGNC Symbol;Acc:20]	16	70286198	70323446	AARS	protein_coding	8.67941	6.75395	4.29905	3.15719	0	0	2.88152	4.53789	5.3792	3.52233	6.80525	4.21138	0	6.39911	0	6.24652	9.11036	5.23988	6.23074	2.91038	0	1.89963	6.13064	0.662535	4.36001	3.97316	6.13818	8.7264	0	8.64935	8.47062	1.29896	5.9769	1.80097	8.04488	0	0	0	5.58804	4.35583	0	7.58164	4.60624
ENSG00000120756	plastin 1 [Source:HGNC Symbol;Acc:9090]	3	142315229	142432506	PLS1	protein_coding	8.73682	7.74725	7.07825	8.9855	1.58369	1.30342	0.81258	6.75299	2.61611	4.49281	1.66597	7.00258	0.447501	0	4.75412	7.61382	2.29542	4.37612	0	6.87507	5.77493	1.64126	0.726558	8.41035	6.21137	5.61689	1.827	1.40858	1.27207	2.01995	7.87802	0	0	4.4509	6.22328	9.45352	6.09448	2.78534	1.38585	5.42005	0	3.04087	5.17226
ENSG00000135678	carboxypeptidase M [Source:HGNC Symbol;Acc:2311]	12	69235977	69365350	CPM	protein_coding	3.80245	3.12256	3.02156	2.15152	2.39717	7.61615	4.09107	2.98947	0.833877	2.93429	1.44195	3.63502	4.03968	4.13049	0.641927	3.00761	2.74558	5.2402	6.54208	2.11866	3.46885	4.25978	4.47073	2.75798	3.319	4.83824	4.44781	2.51054	3.76341	4.56599	3.74866	4.5219	4.5505	3.82609	3.71936	2.75199	2.78414	1.39697	4.08272	4.02475	3.61843	1.31157	4.23714
ENSG00000141424	solute carrier family 39 (zinc transporter), member 6 [Source:HGNC Symbol;Acc:18607]	18	33688495	33709348	SLC39A6	protein_coding	3.22029	4.68484	7.83222	6.47875	1.58369	0	6.38888	5.30776	4.27694	4.12801	6.12557	3.81164	0	8.94198	4.88217	6.33929	4.61661	0	7.55285	8.97012	1.59316	9.68105	4.49717	2.50154	7.05206	8.00043	6.09849	6.99115	6.83549	2.55327	3.21983	5.20095	3.41511	1.80097	7.24243	10.2992	0	2.59741	7.80452	0	8.32415	5.06757	0.951785
ENSG00000095981	potassium channel, subfamily K, member 16 [Source:HGNC Symbol;Acc:14464]	6	39282474	39290744	KCNK16	protein_coding	7.86466	1.72228	3.70178	1.63795	8.04068	7.57559	6.11831	8.00469	5.98701	1.80639	1.06118	1.603	0.589865	8.80648	5.96263	5.8378	6.17494	2.3731	0	3.99084	6.04918	0	0	8.62895	4.1197	0	5.75143	0	4.41161	3.65138	4.69768	7.37537	7.78465	5.9912	7.84128	4.12143	6.02285	0	9.09176	6.92912	10.0587	0	0
ENSG00000166741	nicotinamide N-methyltransferase [Source:HGNC Symbol;Acc:7861]	11	114128509	114184007	NNMT	protein_coding	0	0	5.15791	0	0	0.451049	2.53031	0	0	8.63528	0	6.69063	0	0	0	0	5.15562	1.17259	9.54413	0	0	6.24477	0	8.32508	0	0	0	8.35822	0	0	0	0	0	0	0	0	8.51729	0	0	0	0	5.3674	0
ENSG00000112175	bone morphogenetic protein 5 [Source:HGNC Symbol;Acc:1072]	6	55618443	55740362	BMP5	protein_coding	7.65185	0	0	0	0	0	0	0	0	0	5.79003	0	0	8.68699	0	6.49144	0	2.11916	0	0	0	0	0	0	0	10.1706	0	0	8.34033	9.23749	0	0	3.16369	6.12047	7.23671	3.98344	0	10.1428	8.95125	0	8.14876	0	0
ENSG00000109113	RAB34, member RAS oncogene family [Source:HGNC Symbol;Acc:16519]	17	27041299	27045447	RAB34	protein_coding	0	0	0	0	0	0	0	0	0	0	0	0	0	0	0	0	0	0	6.67242	4.62905	0	0	0	0	0	4.21202	0	0	0	0	0	0	0	0	0	0	0	0	0	0	0	0	0
ENSG00000115170	activin A receptor, type I [Source:HGNC Symbol;Acc:171]	2	158592958	158732374	ACVR1	protein_coding	0.523944	0	0	6.91099	3.96784	0	5.17116	0	3.649	4.9987	1.96262	7.15401	4.68651	0	0	0	0	3.3501	0	6.41398	0	4.70745	9.43692	9.90529	7.37592	3.74875	0	0	6.50178	0	1.91543	0	0	2.69288	2.53464	0	0	4.64368	6.36198	0	0	0	0
ENSG00000158863	family with sequence similarity 160, member B2 [Source:HGNC Symbol;Acc:16492]	8	21946670	21962409	FAM160B2	protein_coding	5.56235	0	0.737545	0	0	0	0	0.479118	0.688348	0.584514	0	2.42792	0	0	3.42028	0	0	2.2184	0	0.551476	0	1.2119	1.42023	3.67577	0.39515	1.56409	6.26381	0.27124	0	0	0	7.72544	0.6703	3.44078	0	0.984776	0	0	7.05732	0	0	0	0
ENSG00000144837	phospholipase A1 member A [Source:HGNC Symbol;Acc:17661]	3	119316689	119348658	PLA1A	protein_coding	3.07792	0	0	0	0	0	0	0	0	0	0	0	0	0	0	0	0	0	0	0	0	0	0	0	0	0	2.60786	0	7.01983	0.685898	8.80162	3.96395	0	0	0	0	0	0	0	0	0	0	0
ENSG00000151726	acyl-CoA synthetase long-chain family member 1 [Source:HGNC Symbol;Acc:3569]	4	185676749	185747972	ACSL1	protein_coding	0	0	8.80772	0	5.53212	0	1.37424	3.52729	0	4.42498	8.76584	1.78463	0	2.23827	0.392954	0	0	0	3.10652	2.81815	0	0	0	0	4.44594	3.92024	0	0	6.56064	1.49882	0	1.29896	5.98987	4.89825	8.04815	0	0	4.84729	4.9555	0	2.48183	7.3131	4.03697
ENSG00000149485	fatty acid desaturase 1 [Source:HGNC Symbol;Acc:3574]	11	61567099	61596790	FADS1	protein_coding	7.13968	3.61343	8.35635	2.73912	1.89132	2.56607	6.4378	2.23417	5.1164	8.27643	6.59749	4.8059	0.594698	3.70039	4.86862	1.45978	2.67498	4.17044	9.25452	1.51485	4.55525	7.61644	6.22552	6.94458	7.9272	9.01263	5.85541	0.950774	9.01165	4.03618	6.53442	0	4.30783	7.51078	7.58365	7.82824	5.65089	0	0	4.87746	3.1886	7.06468	5.22619
ENSG00000156298	tetraspanin 7 [Source:HGNC Symbol;Acc:11854]	X	38420623	38548169	TSPAN7	protein_coding	9.14655	9.0433	10.2105	6.70736	5.96006	6.99163	9.45126	5.1894	3.91744	9.80923	3.52408	8.94995	6.21413	8.98648	8.62059	5.5798	9.66571	2.58896	0	8.91691	9.41811	0	7.53835	8.92117	9.12915	7.13065	9.64004	8.979	8.2538	8.1836	9.59498	8.04779	10.0024	0.581988	0	4.86033	4.05994	7.7388	8.64668	0.653344	0	9.99712	6.46522
ENSG00000142507	proteasome (prosome, macropain) subunit, beta type, 6 [Source:HGNC Symbol;Acc:9543]	17	4699439	4701790	PSMB6	protein_coding	7.70056	4.76053	7.97777	7.74138	7.33105	8.62156	7.04265	8.21689	8.18012	8.29344	8.48993	7.98516	8.52965	7.42225	1.72842	7.91157	5.26169	6.21726	8.23021	8.14959	6.93509	7.54118	7.24522	7.13421	7.61709	5.60269	7.08759	9.03383	8.2923	6.48449	7.78294	9.51631	6.92175	8.9206	8.9352	5.33396	4.13339	0	5.86047	8.17259	4.88313	2.04957	5.09312
ENSG00000073614	lysine (K)-specific demethylase 5A [Source:HGNC Symbol;Acc:9886]	12	389295	498620	KDM5A	protein_coding	0.523944	7.02422	6.54059	5.34357	1.22131	0	4.68262	7.07014	6.65286	5.58365	0	3.37485	1.47403	7.88458	5.26939	0.44384	4.45402	7.72877	9.24796	8.24396	6.79789	4.20785	6.0855	0	3.6256	9.08884	3.48439	8.61587	5.77539	4.35604	6.28667	8.25166	8.43536	0	7.26509	4.66351	6.56434	0	6.34118	0	7.42804	0.600669	5.82244
ENSG00000096006	cysteine-rich secretory protein 3 [Source:HGNC Symbol;Acc:16904]	6	49695097	49712150	CRISP3	protein_coding	0	0	0	0	0	0	0	0	0	0	0	0	0	0	0	0	0	0	0	0	0	0	0	0	0	0	0	0	0	0	0	0	0	0	0	0	0	0	0	0	0	0	0
ENSG00000188706	zinc finger, DHHC-type containing 9 [Source:HGNC Symbol;Acc:18475]	X	128937264	128977885	ZDHHC9	protein_coding	0	7.54005	0	0	2.32041	0	0	0	8.38222	3.24672	6.07995	1.78463	0	0	0	0	0	0	2.71872	0	0	8.48036	0.781936	6.74648	3.76587	0	0	0	8.6876	3.42482	5.18923	6.02819	3.81548	7.62773	1.76433	4.72253	0	0	0	3.26185	2.48183	1.0235	0
ENSG00000151893	CDK2-associated, cullin domain 1 [Source:HGNC Symbol;Acc:23727]	10	120433679	120514761	CACUL1	protein_coding	9.00693	9.24391	8.98233	2.15323	9.01268	8.76683	6.16035	8.4196	5.24331	9.06181	10.2454	9.2554	7.59461	8.77796	6.45864	10.7262	8.44253	3.12802	10.0426	2.88606	9.86752	9.36495	10.6747	9.26167	9.13267	7.61229	9.28063	3.34126	7.40227	8.49235	8.4234	4.93568	8.66424	3.61881	8.85195	2.87052	4.96685	4.42503	10.5062	9.09841	8.28601	8.90202	7.90784
ENSG00000134759	elongator acetyltransferase complex subunit 2 [Source:HGNC Symbol;Acc:18248]	18	33709407	33757909	ELP2	protein_coding	8.42935	5.17266	1.87552	6.46156	0	5.16464	7.3096	4.38471	4.66517	6.58363	6.58889	1.603	0.589865	4.16977	0.701468	7.64271	4.45917	5.89548	6.34333	0	7.89283	6.20259	5.90674	2.83189	1.02394	7.71621	4.73961	8.34517	5.37797	7.79019	7.83844	0.790987	4.08086	0.995536	4.20002	2.52675	0	0.506906	0	0	0	0	4.43018
ENSG00000113558	S-phase kinase-associated protein 1 [Source:HGNC Symbol;Acc:10899]	5	133484633	133512729	SKP1	protein_coding	9.20873	9.52187	8.37503	7.87933	9.54306	8.51214	8.80364	9.61848	7.30306	8.67768	9.04345	8.26625	8.85855	9.79886	9.00689	8.48227	8.64545	9.28517	9.84174	9.94842	9.89031	10.3883	10.2566	7.62089	9.05589	8.84094	7.39687	7.7379	9.89542	9.07514	8.56234	9.90334	9.65503	10.1002	9.78946	9.03007	8.07763	8.05892	6.5533	9.92468	7.61964	9.02666	8.74702
ENSG00000135913	ubiquitin specific peptidase 37 [Source:HGNC Symbol;Acc:20063]	2	219314974	219433084	USP37	protein_coding	6.07815	5.15205	0	7.09499	5.15358	2.29971	0.851294	5.32232	0	0.584514	1.74916	1.79822	1.00735	4.06011	0.392954	0	2.75957	3.19277	0.592192	0	4.70631	6.02907	2.47167	0.709572	0	7.05006	1.57891	7.51522	6.10009	3.06127	7.04415	4.69091	8.88402	0.601019	0	0	0	0.881272	1.165	1.09754	8.03968	0.723068	4.15024
ENSG00000138293	nuclear receptor coactivator 4 [Source:HGNC Symbol;Acc:7671]	10	51565108	51590734	NCOA4	protein_coding	6.06867	8.59097	8.22544	5.60067	5.79687	6.87467	4.85127	0	5.99671	7.58738	8.30104	6.14346	0	0	4.77076	4.42845	0	10.3975	8.06316	6.48319	2.94928	0	0	0	7.66733	4.92648	0	7.76802	7.57455	6.93947	8.02197	7.09622	7.49287	4.71932	6.61596	0.61277	3.72188	8.50406	0	6.0258	5.84702	8.24613	8.183
ENSG00000115738	inhibitor of DNA binding 2, dominant negative helix-loop-helix protein [Source:HGNC Symbol;Acc:5361]	2	8818975	8824583	ID2	protein_coding	8.72491	5.62325	9.52566	7.56216	0.736204	7.60308	2.0651	5.78683	4.97077	5.18852	2.51317	6.59046	6.87872	8.14767	0	0	7.59381	0	6.98719	11.0721	0	2.42489	0	7.3847	3.47022	9.35618	2.06523	5.39049	3.01353	9.10979	1.91543	4.26727	5.46656	9.65017	9.48734	3.07188	2.99428	12.3335	8.61453	0.653344	8.45561	7.44295	6.51027
ENSG00000099942	v-crk avian sarcoma virus CT10 oncogene homolog-like [Source:HGNC Symbol;Acc:2363]	22	21271714	21308037	CRKL	protein_coding	0	4.30021	0	9.34074	9.99298	2.64183	7.52229	7.92216	8.09819	6.72025	6.88713	8.04827	0	4.29997	0	8.84457	0	0	0	3.9921	3.87934	0.628758	0.781936	0.662535	0	0.246883	0	6.89254	2.83716	10.8423	6.78426	0.790987	2.96263	1.57901	0.677432	5.4921	0	0	2.65513	8.81777	4.6701	0	0
ENSG00000135404	CD63 molecule [Source:HGNC Symbol;Acc:1692]	12	56119107	56123491	CD63	protein_coding	10.3781	8.95079	10.9979	9.88524	9.94305	10.0641	10.4354	10.1331	8.96944	9.1124	9.39114	9.76335	9.89422	9.02229	10.0234	8.58869	10.7894	8.37183	10.7172	9.59942	8.46483	10.2308	9.13299	10.5145	10.665	7.90493	9.73152	9.79425	9.48588	9.28331	9.75628	10.6168	9.364	10.4824	10.0301	8.59538	10.5079	9.92268	9.46907	8.26422	8.84425	10.5794	9.19669
ENSG00000112983	bromodomain containing 8 [Source:HGNC Symbol;Acc:19874]	5	137475455	137514675	BRD8	protein_coding	3.58228	2.57702	4.14432	5.28615	4.78755	8.29836	5.45945	3.40939	0.937358	7.12154	4.92311	4.56287	4.01284	2.54575	0	2.41214	4.11836	6.36814	4.85701	7.48342	4.66752	0	4.41051	3.32688	4.56056	0.804519	3.44359	4.6474	5.92008	5.82255	3.03603	3.57941	4.08522	0.581988	5.11104	1.27711	1.85325	7.2925	5.95962	5.90453	0	1.94316	7.45177
ENSG00000138760	scavenger receptor class B, member 2 [Source:HGNC Symbol;Acc:1665]	4	77079890	77135046	SCARB2	protein_coding	8.9705	6.52931	9.08356	8.61197	7.13568	7.2226	4.27911	6.47424	7.31899	7.63854	10.0044	6.27789	7.49189	2.24152	4.07505	4.06412	3.63304	8.68138	9.39872	0.551476	8.17754	6.46093	5.97433	7.8897	4.74646	9.58884	6.88152	6.13782	8.89767	9.87362	7.9262	5.30081	3.9151	7.10991	6.23836	9.80847	7.8064	8.31877	4.87615	4.74197	7.09278	4.86619	8.44036
ENSG00000182220	ATPase, H+ transporting, lysosomal accessory protein 2 [Source:HGNC Symbol;Acc:18305]	X	40440146	40465889	ATP6AP2	protein_coding	8.72491	9.83775	9.65548	8.99897	6.7663	7.90653	8.75661	9.05996	6.67717	8.9397	7.75833	7.86354	7.76948	6.9131	5.89593	8.70284	7.2417	9.48355	8.52733	7.55585	9.06482	6.85436	7.12775	10.0653	8.02583	9.1845	7.55183	7.63034	8.49734	8.21053	9.898	7.497	7.68451	8.24848	8.4528	7.35281	4.87327	0	4.81168	8.38533	8.62717	8.99635	6.44988
ENSG00000117640	mitochondrial fission regulator 1-like [Source:HGNC Symbol;Acc:28836]	1	26145131	26159432	MTFR1L	protein_coding	7.07635	1.28864	1.16	5.05545	7.67871	8.00832	2.93956	1.90668	5.80954	1.67037	1.99444	2.12374	5.06472	0	2.87206	6.43508	2.14149	3.21633	8.17731	3.76243	1.8702	2.32462	3.94717	2.06936	1.96067	2.60247	8.73934	5.3297	2.42181	3.84897	6.14432	3.5978	2.18537	5.04379	8.3603	6.08062	0	10.7235	2.98732	1.28216	3.96337	4.97656	2.99536
ENSG00000102531	fibronectin type III domain containing 3A [Source:HGNC Symbol;Acc:20296]	13	49550048	49783915	FNDC3A	protein_coding	9.38118	7.52572	6.96722	8.43069	5.33204	9.78149	8.15525	7.53337	4.53897	6.59157	8.70495	8.25629	7.9482	6.20979	8.51629	9.95467	9.19596	8.07516	3.69741	1.73462	9.49809	8.00537	0	9.98781	9.27015	5.5488	8.20027	8.78694	5.74081	5.67188	7.83252	8.50888	8.45707	8.37658	7.11188	10.8566	8.65459	0.506906	8.58054	6.81998	6.27802	4.77308	6.20341
ENSG00000072501	structural maintenance of chromosomes 1A [Source:HGNC Symbol;Acc:11111]	X	53401070	53449677	SMC1A	protein_coding	2.02331	5.62325	7.11344	4.77626	0.736204	6.65057	2.53031	0	0	0	5.31312	3.76914	0.589865	0	5.34912	0	6.87473	0	2.71872	0	3.4706	0	0	6.56299	3.38576	3.24545	0	4.09094	0	8.97493	3.66032	2.21763	0	9.44228	0	0	3.76873	2.69443	5.06104	0	8.44299	5.85315	9.77315
ENSG00000138069	RAB1A, member RAS oncogene family [Source:HGNC Symbol;Acc:9758]	2	65297835	65357240	RAB1A	protein_coding	2.42729	8.18076	8.99485	7.19716	6.61772	6.7621	6.7613	6.81925	1.99749	7.66755	3.61218	5.29682	7.9717	3.66518	6.54442	7.20212	5.82177	8.75074	7.77637	7.82237	6.78035	7.91494	0	3.5225	8.30988	2.31006	3.1117	1.82081	7.4162	6.8124	7.75203	0	6.20532	2.45212	7.7029	1.04151	5.3133	10.6108	6.07751	3.76573	2.02054	0.600669	5.90349
ENSG00000145349	calcium/calmodulin-dependent protein kinase II delta [Source:HGNC Symbol;Acc:1462]	4	114372188	114683083	CAMK2D	protein_coding	3.07792	5.14948	7.49062	8.41393	8.20918	8.4499	7.50563	6.78395	9.4121	5.20814	0	8.07455	6.76941	0	7.40993	5.13836	7.59381	0	9.01589	8.82066	8.66449	6.94028	8.83644	8.27709	9.08464	5.72882	9.72285	1.42681	9.26809	7.97256	7.67975	0	10.2182	5.29507	5.29846	2.52675	5.44894	1.81803	7.87134	7.97008	8.21706	5.92848	6.84524
ENSG00000187514	prothymosin, alpha [Source:HGNC Symbol;Acc:9623]	2	232571605	232578251	PTMA	protein_coding	8.52849	8.46988	8.66796	7.83997	8.37169	8.60345	8.35502	8.07732	7.69413	7.44575	8.11754	8.62905	7.4282	7.63374	7.00124	8.91903	7.3264	8.22636	9.77561	8.51577	8.83349	10.0823	9.56302	6.63245	8.09729	7.88781	7.57611	9.35695	8.76159	8.33802	8.95351	7.64645	7.56829	8.73927	9.90939	9.98188	7.65972	8.25589	8.54346	8.50161	6.67091	8.39962	9.8807
ENSG00000114541	FERM domain containing 4B [Source:HGNC Symbol;Acc:24886]	3	69219141	69591734	FRMD4B	protein_coding	0.95713	6.45383	9.20274	1.11571	3.90511	0	3.63885	2.61091	1.74673	5.12571	0	1.52343	0	0.589408	5.29262	1.85838	2.80616	0	1.58237	2.06348	3.24875	4.13482	0	2.38403	8.02869	3.71746	4.82185	7.70521	1.86825	1.49882	6.09333	2.85236	0.659952	0	3.98754	1.04151	4.42422	0	0	1.17278	7.76075	4.90326	4.37279
ENSG00000140105	tryptophanyl-tRNA synthetase [Source:HGNC Symbol;Acc:12729]	14	100800125	100843142	WARS	protein_coding	8.66859	8.69636	6.90407	6.83295	6.79253	0	4.32968	0	0	6.31155	9.14899	5.33446	9.05902	8.59069	0	0	5.50621	7.24412	9.36217	0	0	9.82383	0.781936	4.56874	2.77963	8.71647	7.03985	0	6.88815	8.63617	0	5.68335	3.06911	4.89825	0	5.84235	0	10.5251	6.11476	1.44277	5.17631	0	4.49109
ENSG00000112759	solute carrier family 29 (equilibrative nucleoside transporter), member 1 [Source:HGNC Symbol;Acc:11003]	6	44187242	44201888	SLC29A1	protein_coding	6.18611	0.655252	3.54564	5.80525	6.03521	7.40487	7.05704	5.86614	1.43846	7.87824	5.13125	7.0602	0	5.35188	6.87993	0	3.67425	0	0	7.25971	6.47702	0	0.781936	0	5.20629	4.3384	2.88166	1.1804	4.61968	3.78479	0	0	0	0	7.111	0	8.72459	7.77252	0	0	1.33838	3.50187	4.39826
ENSG00000121417	zinc finger protein 211 [Source:HGNC Symbol;Acc:13003]	19	58141761	58154147	ZNF211	protein_coding	2.86812	7.8706	0.70838	6.6779	1.35498	2.13106	1.56877	4.74678	1.75406	1.71715	0.848387	2.06171	1.20994	3.92587	0	0.86782	0	0.889729	1.35223	2.01943	1.99712	0	1.78797	0.765054	1.99984	2.64353	1.12751	1.48889	0	0	1.13957	1.67391	2.00295	0	0	2.29127	2.67916	1.69211	0.515825	1.78728	8.67651	0.605573	1.93237
ENSG00000146223	ribosomal protein L7-like 1 [Source:HGNC Symbol;Acc:21370]	6	42847356	42857663	RPL7L1	protein_coding	7.68946	7.73481	4.99749	6.43425	7.19392	7.41775	6.4202	9.03555	6.71759	4.53663	9.3118	7.9733	8.00765	7.63505	7.67877	9.9318	7.56292	8.68047	4.51344	6.64395	7.70988	6.00681	7.2276	7.9151	7.60285	6.53648	5.81957	8.46665	8.23811	6.24674	8.08351	8.79573	7.81206	8.82066	6.21551	9.74428	1.84977	7.27481	6.6512	7.35598	7.38105	6.28116	5.60429
ENSG00000141279	aminopeptidase puromycin sensitive [Source:HGNC Symbol;Acc:7900]	17	45600308	45700642	NPEPPS	protein_coding	7.80628	4.09324	5.01635	7.24766	6.43419	6.74235	4.52592	5.44143	1.98664	6.62598	2.25198	5.95292	3.13814	3.30317	6.67096	6.20027	6.82951	8.89859	5.87645	6.75682	7.44355	7.32195	4.0485	6.76743	5.26799	6.49854	3.59348	6.04991	6.43004	5.47744	4.736	8.33757	4.46987	3.5929	4.18726	6.39837	1.63595	3.73444	7.22613	5.01697	7.84143	7.44948	3.43862
ENSG00000170759	kinesin family member 5B [Source:HGNC Symbol;Acc:6324]	10	32297938	32345359	KIF5B	protein_coding	7.16741	4.54972	8.35165	7.54186	8.32453	5.49327	7.51194	7.77482	7.23917	6.79957	9.38881	8.83621	3.96791	5.81362	8.07981	4.37935	5.23288	8.77572	6.65799	2.49974	5.7217	6.53554	4.89615	7.71994	4.81233	2.60649	7.16038	8.19532	5.91727	6.78877	6.88251	1.67391	7.2122	9.25082	4.33466	5.97534	8.82775	9.79175	5.20616	8.86987	7.75852	3.99785	7.89665
ENSG00000100292	heme oxygenase (decycling) 1 [Source:HGNC Symbol;Acc:5013]	22	35776354	35790207	HMOX1	protein_coding	0	0	0	0	0	0	0	0	0	0	0	0	0	0	0	0	0	0	0	0	0	0	0	0	0	0	0	0	0	0	0	0	0	0	0	0	0	0	4.81168	0	0	0	0
ENSG00000182985	cell adhesion molecule 1 [Source:HGNC Symbol;Acc:5951]	11	115039938	115375675	CADM1	protein_coding	9.54447	5.32547	4.29905	0	5.23336	0	7.05669	0	6.92065	6.53223	9.11022	5.10514	6.29987	5.40095	5.84466	7.2981	1.85388	8.59043	0	7.0323	4.44912	0	0	7.35599	7.05971	9.05012	0	3.23919	8.66095	7.6573	0.636405	8.87856	8.319	6.28579	8.51694	3.83085	0	0	5.87531	0	7.04948	3.99785	0.552999
ENSG00000163814	CUB domain containing protein 1 [Source:HGNC Symbol;Acc:24357]	3	45123770	45187914	CDCP1	protein_coding	10.077	2.21562	7.42283	1.6766	0.841802	8.76506	9.07845	3.2641	1.27475	8.20728	8.16988	1.95202	6.44703	6.67077	3.80823	7.86278	9.58793	4.48893	2.70979	1.73865	8.33055	2.41605	3.95187	9.85172	9.1722	9.66328	8.54874	0.969556	9.07079	9.51849	2.35914	3.34031	3.50601	8.67244	9.10529	1.38628	1.66992	9.80752	10.3458	0	4.88909	0.600669	2.54353
ENSG00000139291	transmembrane protein 19 [Source:HGNC Symbol;Acc:25605]	12	72079867	72097836	TMEM19	protein_coding	0.51513	8.20327	1.82207	0	0.724626	0.615604	3.75059	1.62959	2.0446	5.74378	5.81392	1.76227	2.71285	2.42109	2.25194	0	0	3.66928	0	4.54091	1.26618	2.62465	2.43375	0.757613	1.64613	3.82845	3.29046	0	2.42308	1.37224	5.89509	3.23906	2.74617	0.398375	0	1.59021	0	0	7.39885	1.68818	7.27113	1.00876	0
ENSG00000107581	eukaryotic translation initiation factor 3, subunit A [Source:HGNC Symbol;Acc:3271]	10	120794356	120840316	EIF3A	protein_coding	8.79058	8.30397	4.72021	5.18507	7.06061	6.66107	8.57578	7.04053	3.83339	7.97594	6.74806	8.77578	6.99754	9.33033	1.67426	6.49721	8.55539	7.14431	9.50839	6.52755	4.73063	8.72904	4.71041	8.6615	8.23943	8.92224	0	3.8162	9.5215	7.80989	8.64059	8.12152	6.9187	8.99108	7.77177	9.88025	0	10.1955	7.88218	6.62864	5.95762	6.3859	6.14165
ENSG00000136603	SKI-like oncogene [Source:HGNC Symbol;Acc:10897]	3	170075466	170114623	SKIL	protein_coding	8.64084	5.58609	1.6082	4.8686	1.22542	8.17864	6.54341	5.49094	2.0098	7.63187	7.33755	6.18817	8.21727	8.95347	2.98362	3.07699	7.36741	6.52254	7.54777	8.25176	5.27974	10.1467	7.86443	9.28748	8.18146	8.54217	2.20133	1.98979	6.80466	7.67132	6.33374	0.838894	6.88904	8.28145	7.25884	3.2103	1.20847	0	8.40423	1.49355	9.35454	8.5789	8.2635
ENSG00000117632	stathmin 1 [Source:HGNC Symbol;Acc:6510]	1	26210672	26233482	STMN1	protein_coding	7.10398	8.2743	9.62166	5.01125	7.36204	6.61541	7.94756	9.01585	5.54811	7.36638	3.14553	8.06689	7.86372	7.86249	8.15408	6.77077	8.03303	6.72231	1.94193	8.10644	7.82511	3.49641	7.76873	8.04806	9.07356	5.37998	8.86268	7.96348	7.73251	8.79131	4.70751	8.97661	7.32553	8.55048	9.14976	8.89736	6.40545	10.138	6.72001	6.08786	5.18846	8.42629	10.0217
ENSG00000136628	glutamyl-prolyl-tRNA synthetase [Source:HGNC Symbol;Acc:3418]	1	220141943	220220000	EPRS	protein_coding	9.03295	5.70502	5.44987	10.1787	5.70779	10.0745	7.86221	6.88737	0	8.35841	7.429	7.85086	4.96838	9.09276	5.22177	6.15467	4.95741	9.52835	8.1585	5.02944	7.36682	8.85352	9.45773	9.85714	4.71184	7.90833	8.12931	0	9.2725	6.70708	8.89027	0	6.87743	8.82713	10.0391	9.80628	0	5.31223	2.51356	9.71059	6.24613	5.60023	8.11656
ENSG00000159377	proteasome (prosome, macropain) subunit, beta type, 4 [Source:HGNC Symbol;Acc:9541]	1	151372010	151374420	PSMB4	protein_coding	4.59739	8.03974	8.03303	7.09499	1.22131	9.0625	8.7379	6.74251	8.13914	6.28407	9.04048	8.18777	7.04245	6.50416	6.9583	8.84298	0	0	10.1547	6.86375	5.7032	8.26158	8.29441	3.36818	8.22431	7.05289	7.18585	8.02575	5.88308	8.75679	6.92262	3.57941	5.30993	6.94533	7.74381	8.85152	0	6.83604	6.59949	7.28224	5.5503	4.25359	6.24301
ENSG00000107738	chromosome 10 open reading frame 54 [Source:HGNC Symbol;Acc:30085]	10	73507316	73533255	C10orf54	protein_coding	0	0	0	0	0	0	0	0	0	0	0	0	0	0	0	0	0	0	0	0	0	0	0	0	0	0	0	0	0	0	0	0	0	0	0	0	0	0	0	0	0	0	0
ENSG00000087470	dynamin 1-like [Source:HGNC Symbol;Acc:2973]	12	32832134	32898486	DNM1L	protein_coding	4.52598	2.78746	4.72313	4.99103	6.26815	5.70175	4.85723	7.71997	5.09653	5.20756	7.57369	2.96158	4.33477	3.65427	1.75141	6.25103	6.57884	3.00118	7.42319	4.96638	7.00276	7.78484	5.21703	3.11076	4.31869	9.93613	2.04533	0.291285	5.26553	6.05111	8.42505	3.77909	7.37005	3.88308	5.06529	8.08088	6.06269	5.1431	7.52536	2.21152	2.98082	0.600669	6.70655
ENSG00000090382	lysozyme [Source:HGNC Symbol;Acc:6740]	12	69742121	69748014	LYZ	protein_coding	4.07066	3.94979	3.3872	1.13665	2.6461	1.64899	5.35555	4.44356	0	5.04221	3.03321	5.13924	3.08417	5.67635	1.98271	3.44515	5.39406	5.96007	4.8328	2.81338	5.12156	4.6871	5.41976	3.38639	4.99391	6.45642	3.97871	4.58432	5.05669	5.51441	4.53882	4.88986	5.39817	4.21032	4.54149	4.53009	4.03064	3.03101	5.4119	4.67593	4.39408	2.27411	5.07784
ENSG00000144580	RCD1 required for cell differentiation1 homolog (S. pombe) [Source:HGNC Symbol;Acc:10445]	2	219433303	219461803	RQCD1	protein_coding	8.08474	7.00704	7.18135	8.2609	8.77618	7.43273	8.77838	9.7076	6.78738	7.6966	9.02551	7.86851	4.79128	8.70083	6.95448	7.76721	10.257	3.22667	9.1662	7.39356	7.70105	6.91556	9.22732	7.87126	7.92001	9.8987	7.77382	3.90017	9.87528	4.07265	8.17649	0	8.28566	4.71932	6.6149	8.03865	9.24924	7.64481	8.80173	8.36542	9.85225	0	7.33695
ENSG00000080371	RAB21, member RAS oncogene family [Source:HGNC Symbol;Acc:18263]	12	72148654	72184699	RAB21	protein_coding	8.36694	8.25488	7.38214	7.81309	1.99376	8.27673	9.57426	1.94225	6.40623	7.22974	8.95786	6.3147	8.99607	8.5373	6.86474	2.45258	8.80732	10.3431	7.13146	7.48455	8.4551	7.86757	1.80885	9.30324	7.24348	10.1332	7.11125	7.28683	6.3078	8.21559	4.74468	2.32876	9.17609	7.30726	9.19432	3.49868	0.781243	0.593984	9.4015	0	2.34093	1.40175	8.16653
ENSG00000168813	zinc finger protein 507 [Source:HGNC Symbol;Acc:23783]	19	32836500	32878573	ZNF507	protein_coding	4.81499	3.42937	0	2.23156	3.16823	0	3.16375	0	1.83409	0	0	0	0	0	4.57621	0	0	0	5.08703	0	0	0	0	0	0	0	0	0	0.557475	3.65138	1.41324	0	0	0.581988	4.33466	0	0	0	0	0	0	5.02244	5.01337
ENSG00000215301	DEAD (Asp-Glu-Ala-Asp) box helicase 3, X-linked [Source:HGNC Symbol;Acc:2745]	X	41192651	41223725	DDX3X	protein_coding	7.01945	8.33512	6.70649	6.94472	5.33204	6.75231	8.24952	8.24989	3.59897	8.84752	9.08734	6.83667	8.66208	4.67354	7.44922	6.14001	5.62562	0	9.66181	7.60843	7.843	9.4151	7.02463	6.92316	9.36663	8.56517	9.76465	8.44116	9.18518	10.3947	7.09049	1.29896	7.70038	8.90994	8.93317	5.60542	0.521576	4.25573	8.66146	5.77727	6.75499	0	7.91632
ENSG00000112773	family with sequence similarity 46, member A [Source:HGNC Symbol;Acc:18345]	6	82201156	82462491	FAM46A	protein_coding	0.907477	7.85148	8.32187	4.50147	9.95665	10.4742	7.47368	8.77795	9.94753	9.6904	0	5.87951	9.97754	1.04431	7.69353	0	9.65873	9.70782	9.43306	9.28637	8.89183	8.64492	0	9.34045	11.0517	9.0008	8.41429	7.99743	0	7.57679	8.63457	8.28582	8.46816	5.79857	8.98015	10.5611	4.53678	6.93862	9.73136	10.123	9.54791	9.15375	9.71339
ENSG00000137831	uveal autoantigen with coiled-coil domains and ankyrin repeats [Source:HGNC Symbol;Acc:15947]	15	70946893	71055932	UACA	protein_coding	0.596764	6.35931	0	0	0.884051	0	0.79944	0.471023	0	0	0	0	1.00008	1.70379	0	0.488974	1.35375	0	6.16604	0	0	7.27159	1.4847	0	0	0.795145	2.04087	0	0	0	0.982461	1.33281	1.69622	0	1.72302	1.22254	0	0	0.607879	1.19461	4.55472	0.600669	0
ENSG00000151338	mirror-image polydactyly 1 [Source:HGNC Symbol;Acc:21460]	14	37667118	38021566	MIPOL1	protein_coding	8.529	9.55976	7.45106	7.02874	7.72879	7.43248	8.537	8.92191	6.99642	9.19424	7.75487	8.283	8.17841	9.9	7.62398	7.79973	8.7555	9.81658	8.28602	7.40779	9.0167	8.14907	9.2296	6.13884	9.25366	9.17318	9.49355	8.17854	8.35693	8.18197	8.48959	9.214	9.34773	8.79078	9.45065	9.00461	7.17027	8.9437	8.59573	9.24978	9.70026	8.95231	8.54526
ENSG00000138071	ARP2 actin-related protein 2 homolog (yeast) [Source:HGNC Symbol;Acc:169]	2	65454887	65498387	ACTR2	protein_coding	3.22029	6.51188	0	0	6.55781	2.85591	8.10682	8.74292	7.16803	7.44161	7.75833	7.63417	5.44058	4.25251	7.57536	9.14237	5.82177	6.7663	8.38565	6.86375	6.39871	5.88021	5.74198	7.72987	7.8518	8.11963	1.18523	5.41924	4.674	4.22129	7.85926	1.97123	1.94234	3.45458	8.96984	6.13595	9.58569	9.13923	7.61821	4.43437	1.33838	9.63937	0.552999
ENSG00000167996	ferritin, heavy polypeptide 1 [Source:HGNC Symbol;Acc:3976]	11	61727190	61735132	FTH1	protein_coding	9.08282	6.65042	7.77469	7.99006	10.7165	8.08637	5.406	8.18033	6.48843	6.80602	8.57304	8.0411	4.83176	8.16131	6.00538	8.77191	5.44258	3.91537	11.7899	1.51719	8.58453	7.90511	7.95057	7.97349	5.39095	4.84365	4.92134	10.2449	8.30778	8.54873	9.31652	9.69497	5.59551	7.07593	8.37574	10.2044	9.58185	11.5345	9.25402	4.39564	7.47119	8.55192	4.97102
ENSG00000156467	ubiquinol-cytochrome c reductase binding protein [Source:HGNC Symbol;Acc:12582]	8	97238148	97247862	UQCRB	protein_coding	7.84287	5.79844	6.09665	5.75591	7.91414	7.83646	7.35423	6.30887	6.76493	6.8636	7.384	7.2327	7.33758	3.98127	6.26162	5.34682	6.39608	7.16505	8.30012	7.64245	8.6332	5.36677	7.18899	8.09822	8.29583	7.95607	7.73919	6.32986	8.03644	7.53175	7.70105	6.296	6.9389	7.96683	7.86205	6.37566	8.45425	7.86898	8.25375	5.93713	8.30064	7.2416	6.85004
ENSG00000161570	chemokine (C-C motif) ligand 5 [Source:HGNC Symbol;Acc:10632]	17	34198495	34207797	CCL5	protein_coding	7.39723	7.34469	6.56011	2.3998	6.18108	6.02138	8.20214	7.01096	6.06058	7.214	6.19019	7.26379	7.28022	8.16735	5.65931	5.93707	7.66932	8.38163	6.69457	4.90896	7.00397	6.91791	7.87884	4.28022	7.57017	8.23251	7.76185	5.37399	7.47242	6.95583	7.52323	8.61965	7.38387	6.31913	7.44877	6.49836	5.2894	5.38307	7.77376	7.19289	8.78998	6.27771	6.77713
ENSG00000130717	uridine-cytidine kinase 1 [Source:HGNC Symbol;Acc:14859]	9	134399188	134406655	UCK1	protein_coding	2.64491	0	0	0	2.32041	0	0	0	0	0	0	0	0	0	0	0.44384	0	0	0	0	0	0	0	0	0	0	0	7.50184	0	1.14887	0	0	0	0	3.94326	7.08124	0	0	0	0	0	0	0
ENSG00000198722	unc-13 homolog B (C. elegans) [Source:HGNC Symbol;Acc:12566]	9	35161999	35405335	UNC13B	protein_coding	7.99914	7.39483	0	0	0	0.794161	6.50725	0	0	4.67113	8.23839	3.1282	0	0	0	0	2.09369	4.27756	0	0	0	6.68088	5.5994	0	4.56594	5.34307	0	0	2.8343	0.685898	3.72224	0	0	0	3.69886	0	0	0	7.67335	0	5.80819	5.82714	0
ENSG00000259380		15	38431796	38519088	RP11-346D14.1	lincRNA	9.72805	10.3222	8.01032	8.42862	8.09747	9.38033	10.1444	9.54266	7.69628	9.89309	8.75987	9.07351	9.43295	11.1827	8.08541	8.48067	9.95332	10.7278	9.90139	8.09206	10.1682	9.6168	10.3907	7.94658	10.0479	10.5694	10.4231	8.42951	9.2568	9.4197	9.97583	10.8622	10.5355	9.46703	10.5068	9.63358	9.11078	9.30942	9.73451	10.1543	11.111	10.6445	9.9536
ENSG00000137801	thrombospondin 1 [Source:HGNC Symbol;Acc:11785]	15	39873280	39891667	THBS1	protein_coding	0	0	1.57627	0.611701	0	0	0	2.46976	0	0	0	0	0	0	0.704243	0.447655	0	0	0	0	1.21278	8.91482	2.20301	0	0	0	1.22509	0	0	2.38358	0.64666	0	0	0	0	0.632604	0.856046	1.42438	0	0	3.48495	0	0
ENSG00000123179	emopamil binding protein-like [Source:HGNC Symbol;Acc:18061]	13	50234859	50265611	EBPL	protein_coding	4.99396	5.6908	4.44056	4.53734	4.83308	5.16124	6.34236	5.72584	5.61093	5.97458	3.571	6.16386	5.03324	6.77367	4.44113	1.05204	5.99604	7.0846	6.05093	4.72055	5.12823	5.74833	5.86158	3.26393	5.58241	6.7202	6.37517	3.63542	5.46512	6.05943	5.94437	7.21685	6.30352	4.28393	6.21876	5.17673	2.9535	6.38638	6.29703	5.09084	6.91175	3.88539	5.49258
ENSG00000197712	family with sequence similarity 114, member A1 [Source:HGNC Symbol;Acc:25087]	4	38869298	38947360	FAM114A1	protein_coding	7.47257	4.34171	7.58845	1.19771	7.114	3.26848	5.05331	7.25012	5.51463	8.37489	1.79053	5.48502	1.7759	4.27643	3.66388	7.8323	4.17376	2.61084	9.15601	0	5.4525	9.30351	2.21423	7.87597	1.3035	4.46128	3.55568	4.07223	4.27558	5.55719	3.80812	5.09397	6.9227	0	5.24383	3.03603	2.14367	3.46202	3.67732	4.11717	4.00655	4.3499	1.63758
ENSG00000197746	prosaposin [Source:HGNC Symbol;Acc:9498]	10	73576055	73611126	PSAP	protein_coding	9.36155	8.18076	7.7541	8.18963	8.05519	9.09578	8.2757	8.53112	8.48221	8.80601	9.6921	7.75613	6.28125	9.04568	6.95466	9.4284	7.38963	9.18511	9.44677	9.09574	9.15946	10.2999	0.781936	8.06111	7.03136	9.54387	10.6065	6.39506	8.61829	9.76323	9.02688	6.60576	9.04168	9.67844	10.6732	8.89387	3.72188	8.1557	9.06505	6.37351	9.65847	7.08518	8.63854
ENSG00000149474	CSRP2 binding protein [Source:HGNC Symbol;Acc:15904]	20	18118762	18169031	CSRP2BP	protein_coding	7.37574	0	0	0	0	7.07144	2.27425	0	0	0	0	0	0	0	3.94501	9.29495	0	0	1.59939	0	0	0	0	0	0	2.13536	0	2.83548	0	0.589978	6.70987	8.30926	0	0	0	0	0	10.7196	0	0	0	0	0
ENSG00000087086	ferritin, light polypeptide [Source:HGNC Symbol;Acc:3999]	19	49468558	49470135	FTL	protein_coding	13.3032	11.4684	11.3365	12.2391	13.0285	12.0914	11.9838	10.8687	10.5171	11.7344	12.9045	12.0698	11.7123	10.4108	11.6236	11.3628	11.6468	11.3639	13.975	11.4543	11.9738	12.5926	12.5312	12.381	11.8335	10.1282	11.2777	11.1787	12.466	11.556	14.6301	11.7878	10.1706	11.5919	11.6169	12.0913	11.4898	12.6357	11.8877	11.1941	9.10275	12.6055	11.1778
ENSG00000140022	stonin 2 [Source:HGNC Symbol;Acc:30652]	14	81727000	81902809	STON2	protein_coding	4.27732	6.59144	0	0	0	7.03669	7.12445	0	7.94754	6.15854	0	0	7.54206	0.41646	0	0.974815	8.05489	0	0	5.93216	7.73332	0.703249	8.98517	8.10147	8.37431	0	0	0.486482	0	5.50574	2.82761	0	0	0	0	2.38779	0	10.651	0	2.76121	4.75422	0.605573	7.78803
ENSG00000120137	pantothenate kinase 3 [Source:HGNC Symbol;Acc:19365]	5	167975500	168006605	PANK3	protein_coding	6.49268	7.43114	2.38338	7.7793	2.09615	1.87079	7.25207	2.63828	7.16919	3.06232	3.73578	2.6314	0.813655	7.95779	5.43932	7.38967	6.47188	3.65307	3.82379	2.71758	4.9858	5.31367	1.4884	0.712141	8.16521	5.81091	3.20035	0.627186	7.95423	8.18263	4.92111	2.06988	5.15207	2.31045	0.698896	3.89332	3.34283	2.82188	8.92779	2.84065	3.69024	0	2.03788
ENSG00000078668	voltage-dependent anion channel 3 [Source:HGNC Symbol;Acc:12674]	8	42249142	42263415	VDAC3	protein_coding	8.40533	8.84475	7.62349	6.02004	6.7751	4.2186	7.57955	7.22484	6.80955	7.08081	7.53704	6.69631	7.87568	8.84532	8.32628	8.321	5.35312	4.45303	8.07678	6.24715	8.02904	1.67126	0	8.94098	8.80259	0	8.55777	8.35078	5.04767	5.63507	7.99086	0	3.756	5.14106	8.68269	6.57283	8.24438	0	8.12668	4.67981	5.04886	9.66769	6.73568
ENSG00000100554	ATPase, H+ transporting, lysosomal 34kDa, V1 subunit D [Source:HGNC Symbol;Acc:13527]	14	67761088	67826982	ATP6V1D	protein_coding	8.04432	6.49846	7.92384	7.15165	7.19431	8.89571	8.28088	7.13551	8.01426	5.89809	6.75291	8.69894	5.56371	6.17309	6.84221	7.58544	6.92898	9.63549	7.71496	8.71369	7.31634	5.88435	7.79458	7.24154	8.56824	6.64049	7.4372	7.6888	8.34553	8.49651	7.82665	9.75645	5.2324	7.68448	6.65895	3.15051	7.57447	6.5567	6.79659	7.19396	4.77451	6.99133	8.43525
ENSG00000166396	serpin peptidase inhibitor, clade B (ovalbumin), member 7 [Source:HGNC Symbol;Acc:13902]	18	61420169	61472604	SERPINB7	protein_coding	0	0	0	0	0	0	0	0	0	0	0	0	0	0	0	0	0	0	0	0	0	0	0	0	0	0	0	0	0	0	0	0	0	0	0	0	0	0	0	0	0	0	0
ENSG00000105397	tyrosine kinase 2 [Source:HGNC Symbol;Acc:12440]	19	10461209	10491352	TYK2	protein_coding	0.907477	0	0	1.40178	0	0.466461	6.05165	0.483149	5.6499	0	0	2.21395	0	0	0	0	0	0	0.105853	0.551476	2.42863	0	0.781936	2.16902	7.87041	1.09164	0	0	0	2.01561	0	0	1.32265	1.0134	6.31312	4.72253	0	0.506906	1.24244	3.42385	0.574516	3.05886	0.552999
ENSG00000204977	tripartite motif containing 13 [Source:HGNC Symbol;Acc:9976]	13	50570024	50594617	TRIM13	protein_coding	7.44336	1.48216	4.80152	1.87032	6.70354	4.95426	4.78824	2.45752	0.908072	5.87703	2.66425	3.32703	3.62818	4.47867	2.49325	8.44089	2.51425	8.58416	3.91932	8.06101	5.1224	6.52017	6.93679	5.23437	4.05608	4.10181	4.83124	6.46284	2.98028	7.9578	3.48281	5.10043	4.88409	4.5275	7.4219	2.70827	0.903844	0.649247	4.16316	4.41164	6.00749	3.05079	4.7804
ENSG00000123066	mediator complex subunit 13-like [Source:HGNC Symbol;Acc:22962]	12	116395711	116715143	MED13L	protein_coding	1.67329	2.62621	0	0	4.75305	0	5.45918	4.4114	0	0	6.11052	3.25679	8.4436	0	5.94074	0	0	3.09169	6.86688	7.20613	1.88341	3.8186	6.0855	2.34484	2.59485	6.52447	6.48451	1.1804	3.56668	7.15197	1.91543	0	6.34306	0	2.92452	0	0	7.91774	0	6.22675	0	5.08962	0.951785
ENSG00000138758	septin 11 [Source:HGNC Symbol;Acc:25589]	4	77870856	77961537	SEPT11	protein_coding	7.96182	7.57405	8.37813	2.76737	1.89391	2.02706	5.0858	4.74971	5.59876	6.05732	7.77051	7.54754	4.77381	1.14477	7.3444	6.8718	7.75498	2.61676	9.0331	4.01139	6.6876	10.7172	7.82337	0.326014	7.99797	5.09399	2.30911	0	3.90187	6.49105	8.96406	1.38619	5.77911	8.12949	5.20919	7.89837	1.80372	0	0	6.37331	7.79928	3.23061	5.53214
ENSG00000143442	pogo transposable element with ZNF domain [Source:HGNC Symbol;Acc:18801]	1	151375200	151431941	POGZ	protein_coding	8.96845	8.65944	4.60625	0.611701	4.88893	0	7.94346	3.06201	0	7.17539	1.66597	6.83667	2.13398	8.24126	0.154076	7.87177	7.8072	7.4087	5.70528	7.78935	8.80825	8.06814	8.02634	3.62964	6.84583	6.73812	8.43069	0	8.29663	8.05412	7.34509	4.95415	2.0009	5.69167	7.87386	5.78188	0	1.42438	4.87557	1.94583	9.13068	0	6.97353
ENSG00000005700	inhibitor of Bruton agammaglobulinemia tyrosine kinase [Source:HGNC Symbol;Acc:17853]	6	82879700	82957471	IBTK	protein_coding	8.62795	7.65516	7.84291	8.8616	7.60544	0.977441	5.0858	7.58861	8.47008	8.74487	7.02178	3.05014	4.75504	0	0	2.86509	3.7463	3.84576	4.97299	6.95861	7.22489	7.08661	0.781936	4.3462	8.43073	8.59523	8.20912	5.96881	8.27981	6.06048	5.00222	9.86738	4.96957	9.05447	5.55904	8.20052	5.59908	0	7.04778	8.20385	5.95762	7.79855	7.91352
ENSG00000107290	senataxin [Source:HGNC Symbol;Acc:445]	9	135136743	135230372	SETX	protein_coding	3.15086	5.65651	4.2493	5.69192	8.79576	5.65963	7.71145	0	5.02861	7.83155	5.10112	3.9701	6.08053	0	0	3.32272	9.14575	10.5412	8.483	5.55744	7.45238	9.7403	5.02924	8.44816	0	7.58195	0	7.41529	0	5.40571	8.68985	0	5.67361	5.51482	4.24631	1.04151	7.65661	0	0	5.80709	1.33838	0	5.24426
ENSG00000115419	glutaminase [Source:HGNC Symbol;Acc:4331]	2	191745553	191830278	GLS	protein_coding	6.22886	9.83324	9.48855	5.70658	9.82093	7.84337	8.91088	6.26037	10.0529	8.56582	2.20855	8.82458	6.44912	1.70379	5.71858	4.30242	6.43682	2.77668	6.5836	7.13144	9.97285	8.21937	10.1252	8.02421	7.81996	1.09164	6.90318	7.93659	7.36758	4.68274	8.14417	2.74173	7.51753	3.38423	6.73437	6.04638	7.16437	8.65483	0.667922	9.19563	5.45296	6.6739	9.34991
ENSG00000113407	threonyl-tRNA synthetase [Source:HGNC Symbol;Acc:11572]	5	33440802	33469644	TARS	protein_coding	7.45709	6.77682	3.06017	5.48636	2.32041	4.2186	8.1275	5.80707	7.88889	6.49052	4.83431	6.84692	0	3.60347	6.33691	7.49785	8.47021	7.21096	7.27411	6.51291	5.9585	9.80604	3.80218	7.48902	7.91343	8.06279	7.20467	7.37514	9.36519	5.9653	5.53807	5.22931	8.1245	5.54584	8.58251	2.06183	3.98256	0	6.68453	7.18337	4.15506	0	5.17132
ENSG00000128335	apolipoprotein L, 2 [Source:HGNC Symbol;Acc:619]	22	36622256	36636000	APOL2	protein_coding	7.78879	7.79385	7.51829	0	7.3099	4.9736	5.57069	2.50982	4.71839	5.99144	10.6448	1.7003	2.41106	8.56117	0.486191	8.07673	5.47135	3.05297	4.7722	1.40753	3.3483	1.18788	1.8726	0	2.60086	5.28524	5.66188	7.86031	6.26508	7.51014	3.46771	6.36907	5.19571	5.47717	8.56488	8.10218	2.14367	0.625821	6.90092	3.76025	2.19444	0.535341	2.64937
ENSG00000182836	phosphatidylinositol-specific phospholipase C, X domain containing 3 [Source:HGNC Symbol;Acc:31822]	5	41307056	41510730	PLCXD3	protein_coding	6.5248	1.44608	7.84902	7.41369	7.32304	4.57023	5.20269	0	0.51357	5.06478	10.1687	7.6103	6.61442	8.37704	5.15995	9.75503	6.28787	0	0	3.71207	8.29918	0	7.08252	1.29699	5.49541	8.01942	5.62679	1.98365	0	7.93717	7.62812	5.1425	2.61304	7.13067	6.1276	1.64005	6.96218	2.49339	5.70664	5.61812	9.86886	6.34065	0
ENSG00000198898	capping protein (actin filament) muscle Z-line, alpha 2 [Source:HGNC Symbol;Acc:1490]	7	116451124	116562103	CAPZA2	protein_coding	7.82621	8.72637	9.89778	2.97541	6.00562	7.59215	7.34536	7.3053	9.19983	9.15474	8.82003	7.85595	4.40628	8.63589	4.51826	8.86655	8.02157	9.68309	8.90723	4.54523	8.26805	7.86848	8.89865	5.08456	8.90096	9.32852	5.22145	1.63722	8.61135	7.52528	8.21738	6.52798	6.76123	6.5534	6.68481	8.74701	5.2651	8.76922	8.75682	9.2859	3.72568	8.21136	8.56215
ENSG00000116141	MAP/microtubule affinity-regulating kinase 1 [Source:HGNC Symbol;Acc:6896]	1	220701568	220837803	MARK1	protein_coding	8.06046	5.89818	1.22322	3.46377	7.87871	7.41422	5.50011	2.1731	0	4.28413	0.44595	5.53457	8.71159	2.39218	0	0.782777	0	1.41803	2.01622	0	6.2537	0	0	0	7.20776	0	0	4.76406	0	0	2.11327	7.77707	3.77531	8.15096	0	0.61277	0	0	0	5.16758	5.34857	7.52674	0
ENSG00000150477	KIAA1328 [Source:HGNC Symbol;Acc:29248]	18	34409069	34812135	KIAA1328	protein_coding	7.99859	8.69648	7.0255	6.71209	7.07685	7.0136	8.28051	8.29374	6.54111	8.26373	5.19441	7.26456	7.63389	9.27393	6.32676	7.00048	7.83319	8.53723	8.03331	6.01894	8.3425	7.16278	9.2109	5.94738	8.00853	9.00304	8.72738	6.50911	6.88008	7.07877	8.19755	9.2496	8.6548	7.30064	8.66889	7.66144	7.61035	6.71597	8.11315	8.45101	8.53932	9.13566	8.41808
ENSG00000143995	Meis homeobox 1 [Source:HGNC Symbol;Acc:7000]	2	66660584	66801001	MEIS1	protein_coding	8.24174	0	8.92922	8.43389	9.53661	0	8.41345	7.02765	0	8.02657	8.74285	2.91089	6.65114	7.52143	2.04642	0	2.63909	0	6.17103	6.16547	8.88364	3.46106	3.15953	0	3.8937	7.96168	8.36497	8.94357	7.99572	4.858	7.34292	8.92666	6.86341	0	6.50611	8.08437	3.46166	9.41933	4.43345	3.42462	0	6.39478	4.42987
ENSG00000140319	signal recognition particle 14kDa (homologous Alu RNA binding protein) [Source:HGNC Symbol;Acc:11299]	15	40327940	40331389	SRP14	protein_coding	8.89909	9.05582	9.2781	9.10235	7.55525	9.35141	8.14765	8.24062	6.73043	8.6515	7.40453	8.28522	8.24573	8.33964	8.69332	9.13665	8.80557	8.87155	9.231	9.45295	8.524	8.29689	9.59826	9.00701	8.18737	8.75668	7.19842	8.47577	9.49439	8.51418	8.27533	9.27673	6.82774	9.06522	8.71185	8.5037	8.21718	10.0293	8.01289	7.94011	8.08521	8.84901	6.82725
ENSG00000112685	exocyst complex component 2 [Source:HGNC Symbol;Acc:24968]	6	485133	693117	EXOC2	protein_coding	7.5611	0	3.06017	3.24016	5.04255	0	0	0	0	6.17858	0	7.98687	8.18202	9.41022	2.25004	8.3063	8.74756	8.91717	2.82587	0	5.14121	1.0652	0	0	0	8.34212	0	6.49972	7.47096	8.14689	4.42725	7.57642	0	0	0	1.04151	0	10.759	6.66792	2.97705	0	0	3.61013
ENSG00000163581	solute carrier family 2 (facilitated glucose transporter), member 2 [Source:HGNC Symbol;Acc:11006]	3	170714137	170744539	SLC2A2	protein_coding	3.41053	0	0	0	0	0	0	0	0	0	6.35993	0	0	0	0	7.27103	0	0	0	0	0	0	0	0	0	5.51351	0	0	0	0	0	0	0	0	0	0	0	0	0	0	0	0	0
ENSG00000175390	eukaryotic translation initiation factor 3, subunit F [Source:HGNC Symbol;Acc:3275]	11	7991798	8023409	EIF3F	protein_coding	4.54423	8.53243	1.22322	6.57777	8.84254	0	2.57147	4.68206	1.43618	6.8075	1.49111	3.43154	1.00735	2.23502	0.392954	6.92559	7.34977	0	8.02712	0	1.88341	0.628758	0	1.96876	7.76201	4.07349	5.06553	6.97672	8.33937	5.34262	6.41361	6.52798	7.116	0	6.38222	6.76057	6.3267	2.12697	7.32676	4.61418	7.8281	3.6868	2.5539
ENSG00000130830	membrane protein, palmitoylated 1, 55kDa [Source:HGNC Symbol;Acc:7219]	X	154006959	154049282	MPP1	protein_coding	8.97136	6.418	0	0	2.32041	0	0	0	0	0	0	3.53559	0	0	0	3.97902	0	0	0	0	0	0	0	0	7.8119	2.60649	0	0	0.557475	3.78479	0	0	0	5.82411	4.49662	0	0	0	0	0	4.83371	0	1.26387
ENSG00000115568	zinc finger protein 142 [Source:HGNC Symbol;Acc:12927]	2	219502639	219524378	ZNF142	protein_coding	0	0	0	0	5.67056	0	0	0	0	0	0	1.39517	0	0	6.83316	4.42845	0	0	0	0	0.741889	0	5.95773	0	0.705012	6.73061	0	0	0	0.685898	6.54833	0	0	0	6.98699	0	1.66794	0	9.11799	0	0	0	0
ENSG00000114933	INO80 complex subunit D [Source:HGNC Symbol;Acc:25997]	2	206858445	206951027	INO80D	protein_coding	8.49917	8.20906	5.71841	2.38529	7.03886	0	8.20027	5.8672	1.65176	8.00147	6.67834	6.98792	6.67985	0	0	7.82743	7.58401	9.07982	3.66372	9.34162	7.19872	6.26541	7.51015	7.37713	6.91564	7.63217	7.3356	8.6602	0	4.858	5.40659	0.790987	7.91908	4.84935	8.49175	1.64005	0.521576	0	6.67932	7.24704	4.56594	8.02943	8.76785
ENSG00000175938	ORAI calcium release-activated calcium modulator 3 [Source:HGNC Symbol;Acc:28185]	16	30960387	30967782	ORAI3	protein_coding	6.4617	5.28329	0	0	0	0	0	0	7.93899	0.584514	4.49284	0	0	0	3.94061	0	0	0	4.03595	4.60165	0	0	0	0	0	0	4.32984	0	0	0	0	0	5.06236	0	7.01427	0	0	0	0	0	0	3.74352	0
ENSG00000164266	serine peptidase inhibitor, Kazal type 1 [Source:HGNC Symbol;Acc:11244]	5	147204131	147211349	SPINK1	protein_coding	0	6.08082	6.13756	3.93146	0.736204	0	0	0	0	1.32112	0	0.493187	3.1004	0	0	0.44384	0	0	0	0	0	0	8.35906	0	3.9536	0	0	7.22079	0	0	1.68608	6.6898	0	0	0	0	3.46166	0	0	2.7502	0	0	3.16048
ENSG00000254772	eukaryotic translation elongation factor 1 gamma [Source:HGNC Symbol;Acc:3213]	11	62327073	62342401	EEF1G	protein_coding	10.1664	7.86794	8.79043	9.85196	8.20003	9.6145	8.57878	8.92158	9.1078	8.3193	9.86532	8.70791	9.33141	8.59287	7.03408	9.51025	8.17628	6.52149	10.0724	9.15703	7.77138	10.2477	8.97076	10.1016	8.47744	9.012	9.16886	7.4845	10.6364	9.65989	8.66641	9.33498	9.34689	9.25537	10.4736	10.7587	9.77045	10.2701	10.1169	9.87845	7.96185	9.14844	9.11176
ENSG00000154553	PDZ and LIM domain 3 [Source:HGNC Symbol;Acc:20767]	4	186422851	186456766	PDLIM3	protein_coding	1.28725	2.42315	1.39779	0	0	2.85004	2.8784	2.47887	0	0	1.38106	1.13364	1.59234	2.07144	0	0	1.42572	1.4928	5.97659	3.19488	0.885323	5.59814	3.23753	0	1.23948	0.959411	1.84758	1.37375	1.69413	0	1.23442	7.6189	0.675446	2.60488	0	0.535868	0.950108	2.07458	2.61271	2.76486	4.00792	0.924913	0.97597
ENSG00000153956	calcium channel, voltage-dependent, alpha 2/delta subunit 1 [Source:HGNC Symbol;Acc:1399]	7	81575760	82073114	CACNA2D1	protein_coding	0	5.17266	3.90824	4.98311	0	0	0	0	0	0	5.27314	1.15228	5.6868	5.68546	0	5.12353	0	0	0	0	0	1.39983	0	1.11485	5.73615	2.13536	0	4.09094	6.35154	7.0953	5.73114	3.05356	5.53893	3.31388	6.35586	0.61277	0	6.36199	0.667922	3.42462	7.25114	0	7.41816
ENSG00000110768	general transcription factor IIH, polypeptide 1, 62kDa [Source:HGNC Symbol;Acc:4655]	11	18343842	18388591	GTF2H1	protein_coding	4.60909	1.65539	5.83431	0	6.78384	6.34009	5.58583	2.51278	3.57432	0.0495853	6.75403	1.23704	0.370679	6.81809	0	0	0.719962	0.965811	7.7686	0	8.69337	9.2502	0.941766	0	0	8.82354	9.20512	0	6.89702	1.49882	1.46051	2.22891	0	0	0	2.52543	8.65147	0	2.90238	7.2554	10.1182	0	5.1141
ENSG00000162065	TBC1 domain family, member 24 [Source:HGNC Symbol;Acc:29203]	16	2525147	2555735	TBC1D24	protein_coding	8.09825	4.72239	5.63698	2.74822	3.32022	3.96251	7.48783	3.4403	2.17052	5.14417	8.79759	4.45468	5.07816	8.57063	4.0282	9.5632	8.25846	8.08683	3.95611	2.72674	7.71686	7.62528	9.0089	3.23653	5.3942	9.98215	4.77864	2.24876	8.74819	8.41583	7.98365	5.00359	8.85779	9.22998	8.32053	5.03442	0.747958	5.68659	5.99468	8.45412	5.83741	2.35643	4.22494
ENSG00000100023	peptidylprolyl isomerase (cyclophilin)-like 2 [Source:HGNC Symbol;Acc:9261]	22	22006559	22054304	PPIL2	protein_coding	4.81095	2.11391	4.34857	0	0.930148	0.632781	0.895186	4.30384	8.54362	6.2648	0	4.74471	0	0	1.8221	2.81649	1.85648	0	0	1.9253	3.99943	0	2.83963	0.36897	2.30038	3.15856	3.65897	0.562678	4.81799	5.1084	1.79382	4.01762	5.59974	0	3.95836	5.26217	0.521576	0	3.80496	0.22171	5.96576	0	2.659
ENSG00000165699	tuberous sclerosis 1 [Source:HGNC Symbol;Acc:12362]	9	135766735	135820020	TSC1	protein_coding	0	5.84145	2.66418	0	8.76518	0.794161	7.30286	2.34906	7.90194	6.69911	5.65136	0	0	6.30794	3.5416	0.44384	8.82029	5.2076	3.66372	0.542281	2.12493	2.42489	4.93059	0	2.26488	8.24585	2.07398	0	4.8817	6.3133	4.04655	0	7.55962	5.75941	6.49656	0.61277	5.55966	1.62083	0	4.86134	2.83081	9.21646	8.96684
ENSG00000092199	heterogeneous nuclear ribonucleoprotein C (C1/C2) [Source:HGNC Symbol;Acc:5035]	14	21677295	21737653	HNRNPC	protein_coding	7.54428	9.03384	8.36922	10.4363	8.30644	6.50074	7.64987	5.86614	5.83321	7.14332	8.31587	7.33242	2.18134	7.36287	7.1454	9.93993	9.87332	9.69333	9.87174	8.48235	8.79906	9.48932	7.96535	8.96978	8.0926	7.77309	8.40266	8.75628	8.00634	7.92113	7.72582	6.12193	7.81046	9.34422	9.63274	7.65494	8.27309	5.09841	8.77244	8.64888	3.34654	8.64082	7.48363
ENSG00000130695	centrosomal protein 85kDa [Source:HGNC Symbol;Acc:25309]	1	26560691	26605299	CEP85	protein_coding	0	0	0	0	2.66136	0	1.37424	0	0	0	0	0	0	0	0	2.83263	0	0	0	0	0	0	0	0	6.27145	0	7.35818	0	7.14049	0	1.68608	0	0	0	0.677432	0	0	4.34809	0	0	0	0	0
ENSG00000118816	cyclin I [Source:HGNC Symbol;Acc:1595]	4	77968311	77997158	CCNI	protein_coding	9.48658	9.04263	7.2462	8.37085	10.2785	8.13655	7.7862	5.14238	5.28742	6.52223	8.8543	7.43475	4.56309	6.77996	6.78073	9.13869	7.93173	8.20608	8.92391	5.74446	7.76041	8.37855	6.0855	7.41458	6.6877	9.42548	6.99732	7.95634	9.00097	8.34084	8.00339	5.3112	8.60297	10.1597	8.50609	8.53285	7.61875	9.14402	10.7124	8.23942	8.55863	9.13664	6.36886
ENSG00000071537	sel-1 suppressor of lin-12-like (C. elegans) [Source:HGNC Symbol;Acc:10717]	14	81937893	82000205	SEL1L	protein_coding	8.43301	5.17266	4.98629	7.449	5.09969	0	7.91552	6.80925	0	5.20814	3.77372	7.98919	3.33513	7.19521	5.04151	5.46683	7.63234	6.38844	2.01622	5.45397	1.59316	6.88801	5.5994	4.71998	8.34944	7.30072	6.42157	7.58031	8.57969	3.9643	7.48364	7.33679	0.64953	2.45212	8.45033	2.87781	0	2.49339	7.0794	7.88174	5.11399	7.09066	2.82227
ENSG00000135976	ankyrin repeat domain 36 [Source:HGNC Symbol;Acc:24079]	2	97779233	97930258	ANKRD36	protein_coding	6.68852	4.88223	4.10793	7.83003	7.02425	6.42524	7.2312	7.8434	3.47408	3.5435	0.752388	4.51662	7.35411	4.44599	6.69814	5.63072	7.68237	3.35718	3.98136	3.438	7.41018	1.12062	3.65422	1.58037	6.21664	6.89457	6.83616	7.14386	6.7864	8.08782	5.79491	6.87317	0	2.9258	7.4354	1.02285	1.20575	2.39981	4.12666	7.37612	10.5083	7.18446	6.94603
ENSG00000142669	SH3 domain binding glutamic acid-rich protein like 3 [Source:HGNC Symbol;Acc:15568]	1	26605667	26608007	SH3BGRL3	protein_coding	7.7867	8.16639	5.74737	7.22513	8.91229	6.17402	6.87331	5.20778	6.73623	7.89747	0	7.09931	6.32962	3.7812	6.97807	8.03541	4.86335	3.75932	9.02913	5.99838	3.18511	9.62541	7.95443	7.98575	6.75994	2.96106	3.96818	0	3.3832	7.24296	7.67192	3.66495	5.52117	3.45131	7.6957	5.66517	8.50253	9.09503	7.86261	1.95011	0	6.797	7.5357
ENSG00000166405	RIC3 acetylcholine receptor chaperone [Source:HGNC Symbol;Acc:30338]	11	8127597	8190602	RIC3	protein_coding	7.90143	5.27731	6.24301	3.65673	3.66652	3.32241	6.10602	2.06834	3.68637	6.3489	4.92483	2.82968	4.47899	6.15975	4.26298	3.82546	4.59726	5.30723	2.09374	2.79124	5.50086	3.14646	5.01294	5.02124	5.61339	5.68223	5.53938	5.93934	2.99657	6.73809	7.98942	2.1925	5.47119	4.34023	3.64804	1.8663	0	0	8.10675	7.47563	5.98225	1.66401	5.19911
ENSG00000132849	InaD-like (Drosophila) [Source:HGNC Symbol;Acc:28881]	1	62208149	62629592	INADL	protein_coding	4.42225	3.76571	5.0866	2.23156	6.06436	1.41287	7.79729	5.66171	2.11465	6.46056	8.61905	7.06081	7.68134	7.09619	2.29675	1.05704	7.42012	6.43407	1.06783	5.31138	8.95789	2.19982	7.24556	0.315916	4.57093	7.19449	4.76316	5.97182	2.26642	7.85599	4.32958	5.15023	8.07035	4.90377	6.28001	7.22054	0	4.45469	8.08508	1.49648	5.70881	6.2211	5.52967
ENSG00000013374	negative regulator of ubiquitin-like proteins 1 [Source:HGNC Symbol;Acc:17623]	7	151038785	151075535	NUB1	protein_coding	1.88307	3.36964	2.60686	2.38529	0.505328	0.451049	3.62588	4.76427	1.13568	6.47602	0	6.04253	0	3.9193	3.1783	1.67199	4.74032	3.42837	2.02704	9.40675	6.01958	7.61884	7.67087	7.46066	2.15486	7.40675	6.72371	0.508055	7.50114	8.3775	3.44512	1.66064	7.7411	0.753379	7.42949	2.07639	0.751695	7.60821	1.1574	3.41458	1.33838	5.21587	0.692976
ENSG00000134333	lactate dehydrogenase A [Source:HGNC Symbol;Acc:6535]	11	18415935	18429972	LDHA	protein_coding	1.9236	8.85078	6.50573	9.27087	1.54801	7.52999	7.36207	9.8201	3.88357	7.70557	5.0996	8.69561	8.24208	0	8.23628	0.893225	5.54085	8.26059	10.4564	10.6077	7.99902	12.2771	7.98997	4.54983	5.51562	0.976099	7.88872	0	0	5.88852	9.2855	4.09734	8.10889	0.00715115	6.64864	9.27773	0	1.78845	1.26735	7.02741	0	10.3431	9.66086
ENSG00000167004	protein disulfide isomerase family A, member 3 [Source:HGNC Symbol;Acc:4606]	15	44038590	44065477	PDIA3	protein_coding	7.25567	6.89999	7.69882	8.64843	5.31839	7.0975	8.43893	7.24204	2.32131	7.84728	5.61983	5.80344	5.87636	6.86985	5.67875	7.40278	6.45198	6.84185	10.2494	8.38726	7.79402	5.86677	4.07276	7.17958	7.3493	6.18643	7.32676	9.24532	2.10495	7.98544	8.76532	6.4524	4.85121	7.61316	8.949	6.94871	8.33667	6.62278	6.42096	8.40238	3.72568	7.41157	8.62739
ENSG00000143376	sorting nexin family member 27 [Source:HGNC Symbol;Acc:20073]	1	151584541	151671567	SNX27	protein_coding	9.56656	5.35171	0	8.25931	2.93066	8.02522	8.0373	4.6037	0	2.99882	0.563762	2.26988	5.22761	8.45607	1.21681	8.96092	6.16025	3.77967	1.32033	0.371077	5.82627	6.85142	0	0.322656	5.0722	3.49018	3.09566	9.09181	8.70683	8.24828	5.12397	4.23686	3.29403	4.77117	8.94094	3.35087	1.40633	2.39751	2.07545	1.95652	1.40652	1.97003	4.61039
ENSG00000086758	HECT, UBA and WWE domain containing 1, E3 ubiquitin protein ligase [Source:HGNC Symbol;Acc:30892]	X	53559057	53713673	HUWE1	protein_coding	8.16238	7.84788	7.80665	5.32468	8.73619	4.18987	6.7613	6.503	5.6488	8.73675	1.96262	7.79636	8.11789	7.49619	7.5895	3.94568	8.75849	7.44356	1.8228	9.00322	8.98667	7.85833	5.09145	8.5025	7.09923	8.35215	8.11281	7.69054	8.71539	9.37477	7.59126	9.04507	9.02288	5.20075	8.67637	4.60196	3.90079	7.68669	6.47133	4.04141	5.84702	4.17327	8.9869
ENSG00000078142	phosphatidylinositol 3-kinase, catalytic subunit type 3 [Source:HGNC Symbol;Acc:8974]	18	39535171	39667794	PIK3C3	protein_coding	5.19221	8.19789	2.18805	1.05467	8.09406	7.22897	4.31475	4.99209	1.548	6.64497	2.40486	4.05036	3.63699	3.41804	2.50841	4.05727	8.66345	8.76689	6.58466	1.97056	7.24204	4.47351	5.25802	1.68476	7.56466	8.04251	8.71148	2.11598	4.09224	8.9289	6.52655	6.47626	7.66976	7.11385	6.01966	3.83567	3.81008	4.62805	4.93925	4.85508	5.38597	6.02018	4.15516
ENSG00000100030	mitogen-activated protein kinase 1 [Source:HGNC Symbol;Acc:6871]	22	22108789	22221970	MAPK1	protein_coding	4.5445	3.62221	6.62026	6.27406	4.72427	4.0373	0.882781	7.51519	0	5.32242	6.5962	1.15492	4.13856	0.734643	0	4.12019	6.97431	6.66069	4.75738	0	1.92487	1.43814	1.45472	5.1007	4.82586	1.68828	9.32689	0.520845	1.27769	4.89152	0	3.96328	6.00464	2.52492	4.86714	0	5.57595	10.6784	9.14706	6.01331	6.83134	0.610462	1.27227
ENSG00000154556	sorbin and SH3 domain containing 2 [Source:HGNC Symbol;Acc:24098]	4	186506598	186877806	SORBS2	protein_coding	9.37589	7.58511	7.43518	5.55278	1.58369	0	3.60243	3.58657	4.71299	6.40738	9.52468	8.04813	7.08091	3.23481	0.403237	7.6479	7.49799	5.91	6.09808	2.36281	5.34587	5.11924	7.05936	0	6.31777	2.95686	7.13446	5.35819	7.70094	3.34064	6.46911	5.68438	8.42823	0	7.39405	2.06183	5.75846	6.75406	8.52513	7.07917	1.33838	9.33541	2.5778
ENSG00000131711	microtubule-associated protein 1B [Source:HGNC Symbol;Acc:6836]	5	71403061	71505395	MAP1B	protein_coding	12.232	8.54508	8.22222	8.88435	9.49062	9.46966	10.139	9.4898	3.43754	8.14077	10.4255	9.33755	10.1362	11.4718	9.35402	11.6092	10.907	9.98754	10.2983	10.4831	9.73621	10.1623	9.8394	9.36807	10.0511	10.5136	8.03436	10.3679	11.8491	10.8325	10.1198	8.67928	10.8406	12.3355	12.004	11.159	10.2455	9.89933	11.7368	8.66118	9.63647	9.32383	9.73411
ENSG00000144597	ELL associated factor 1 [Source:HGNC Symbol;Acc:20907]	3	15468862	15484120	EAF1	protein_coding	7.84034	7.90855	0	8.59032	7.41916	8.61602	5.5566	5.51587	5.93584	7.42056	7.9771	8.77347	0	9.68467	6.78261	2.56135	9.39878	8.41374	1.91888	7.38003	8.81597	7.0418	7.82685	6.81876	5.8562	6.3803	4.34439	0	5.55167	7.52962	7.13055	0	6.98639	8.85117	9.11734	8.38011	0	9.02672	7.55786	4.52115	10.1684	6.92813	6.02375
ENSG00000168092	platelet-activating factor acetylhydrolase 1b, catalytic subunit 2 (30kDa) [Source:HGNC Symbol;Acc:8575]	11	117014983	117047610	PAFAH1B2	protein_coding	9.52612	8.86451	9.81685	8.58269	6.58438	4.92824	6.65669	5.50166	5.55954	8.99728	9.07231	7.60964	7.85603	8.87773	8.80492	9.82983	10.0833	7.6458	8.46568	6.22397	9.88051	10.0332	6.03717	8.39267	8.8563	8.54547	7.94107	9.23115	8.88063	8.0772	6.31548	4.09549	8.23752	8.70288	9.38169	10.215	9.67402	1.01652	9.53627	5.03523	8.54971	9.20498	7.05242
ENSG00000150636	coiled-coil domain containing 102B [Source:HGNC Symbol;Acc:26295]	18	66382446	66722426	CCDC102B	protein_coding	0	2.62621	0	0	0	0	4.72667	0	0	2.32085	0	0	0	0	0	0	0	0	10.7542	4.85475	0	8.78192	0	0	0	0	0	5.1882	0	0	0	0	0	0	3.55915	0	0	0	0.667922	0	0	0	4.2644
ENSG00000162819	BRO1 domain and CAAX motif containing [Source:HGNC Symbol;Acc:26512]	1	222885895	222908538	BROX	protein_coding	8.92393	8.23522	9.08246	5.67785	6.44338	5.22294	8.61995	8.02536	8.97933	7.81036	0.801186	5.68592	7.45453	8.48656	7.55984	10.4481	7.88613	7.49354	4.88081	6.76351	4.80087	7.73237	8.96888	9.07523	5.33844	9.41311	8.80752	7.74884	7.77998	7.84362	9.71396	2.69694	8.71894	4.03774	7.96747	10.474	0	11.3405	7.54122	5.97507	5.4794	8.89809	0.734073
ENSG00000166986	methionyl-tRNA synthetase [Source:HGNC Symbol;Acc:6898]	12	57869228	57911352	MARS	protein_coding	4.5169	2.15359	0	0	0	0.451049	0	5.62524	0	4.69915	7.90155	0	0.589865	0	4.47829	0	7.7482	8.87563	8.53191	0	7.33015	1.67126	5.5337	1.04321	5.36934	7.62847	5.73565	7.2917	7.01621	6.96254	6.84125	0	0	5.60595	7.99864	0	2.73591	0	5.53407	1.71863	9.31845	8.87725	7.34543
ENSG00000100365	neutrophil cytosolic factor 4, 40kDa [Source:HGNC Symbol;Acc:7662]	22	37257030	37274057	NCF4	protein_coding	0	0	0	0	0	0	0	0	0	0	0	0	0	0	0	0	0	0	0	0	0	0	0	0	0	0	0	0	0	0	0	0	0	0	0	0	0	0	0	0	0	0	0
ENSG00000138767	CCR4-NOT transcription complex, subunit 6-like [Source:HGNC Symbol;Acc:18042]	4	78634541	78740769	CNOT6L	protein_coding	7.08606	7.78534	6.29298	5.09878	6.94063	5.90911	8.61732	6.67804	6.74775	5.45812	7.58137	3.37485	1.00735	2.8825	0	8.40005	1.20624	6.03078	8.37687	6.51291	7.59968	0	0	8.54251	6.48948	0	7.9735	4.95286	3.44698	2.39532	2.44244	4.77026	0	0	8.09633	1.04151	6.53075	0	5.33801	4.80333	1.68553	6.89797	6.17934
ENSG00000101310	Sec23 homolog B (S. cerevisiae) [Source:HGNC Symbol;Acc:10702]	20	18488137	18542059	SEC23B	protein_coding	7.0907	4.31986	0.737545	0	3.90511	7.6354	6.01553	2.1731	0	5.10722	4.95715	7.85595	0	5.03876	5.06868	7.40585	5.28219	9.36234	0	5.84136	6.95469	0	6.43651	0.906346	7.6219	8.43464	0	8.83307	4.47418	3.15593	7.15926	6.09135	5.4098	8.45256	8.51793	0	4.09713	0	4.07871	0	2.83081	6.18551	0
ENSG00000132872	synaptotagmin IV [Source:HGNC Symbol;Acc:11512]	18	40847843	40857615	SYT4	protein_coding	7.27737	3.08297	6.9203	8.7457	4.56296	4.37989	7.63839	8.57604	5.66104	3.3911	9.47724	4.36194	7.61449	4.36835	0.95549	4.42845	7.94327	6.56444	0	7.52701	8.72076	0	4.62886	7.65883	4.44594	10.2268	7.45039	7.37183	7.30445	8.5521	4.66652	4.09302	8.61349	6.05728	8.70772	7.73252	2.53375	0	7.32697	8.22609	6.81498	7.28472	5.07464
ENSG00000180543	TSPY-like 5 [Source:HGNC Symbol;Acc:29367]	8	98285717	98290176	TSPYL5	protein_coding	0.907477	7.40954	7.67622	6.09996	7.96965	8.78728	5.48506	5.72435	0	6.9294	9.38412	3.37485	0	7.40869	8.17509	0	0	0	7.03264	6.57763	8.48392	0	0	0	6.76496	9.41473	7.25968	7.98547	0.557475	3.34064	6.19138	0	8.00823	6.74603	7.11725	2.77001	0	0	0	6.80158	5.5503	0	0
ENSG00000186472	piccolo presynaptic cytomatrix protein [Source:HGNC Symbol;Acc:13406]	7	82383329	82792246	PCLO	protein_coding	8.422	7.94868	6.67857	2.5242	8.72261	2.92725	6.36121	7.19443	0.51357	5.85666	8.8756	7.85086	3.01283	9.08713	8.06302	0.782777	7.41195	9.96841	0	6.86375	8.81853	0.628758	4.24686	0	5.18145	9.12875	9.59203	6.16828	9.08348	6.9323	2.71028	7.20732	6.02809	10.4084	9.38631	4.96181	8.2214	9.75075	1.12272	0	10.1391	0	7.67055
ENSG00000140264	small EDRK-rich factor 2 [Source:HGNC Symbol;Acc:10757]	15	44069285	44094787	SERF2	protein_coding	9.15615	8.49375	9.60791	9.958	10.0602	8.96318	9.0644	8.13241	9.17526	9.45385	8.72964	9.57524	9.50179	8.30383	9.21722	8.97406	8.8925	7.55095	9.7102	10.1018	9.54321	9.23113	9.90917	8.65074	8.85938	7.66479	8.81162	9.09794	8.46161	8.14009	9.47022	7.83359	7.59174	9.06227	8.91279	10.6651	9.76203	8.92604	7.65239	9.00267	8.55277	9.74118	9.37804
ENSG00000124356	STAM binding protein [Source:HGNC Symbol;Acc:16950]	2	74056086	74100786	STAMBP	protein_coding	6.79891	6.60854	0	0	0	0	4.0114	5.27907	0	3.32072	0	2.65493	0	8.25442	0	0	2.29926	0	6.75609	5.93216	5.43826	0	0	0	2.98764	2.13536	0.711054	7.98547	3.92131	6.49952	1.41324	7.46158	6.24912	5.60595	1.99872	0	5.72321	6.44102	5.73881	0	0	0	1.52031
ENSG00000174989	F-box and WD repeat domain containing 8 [Source:HGNC Symbol;Acc:13597]	12	117348761	117468953	FBXW8	protein_coding	0.67006	0.910413	0	0	6.13645	0	4.17231	2.06968	0	0.560282	0	4.38238	0.599516	1.37494	4.65756	2.56399	0	0	1.83106	6.99787	7.55075	0	3.1572	0.657213	0	2.02742	0	0	1.35421	0	1.97361	5.70452	6.27795	0	1.15998	1.37749	6.30302	2.6094	3.43103	0	0	0	5.32952
ENSG00000034510	thymosin beta 10 [Source:HGNC Symbol;Acc:11879]	2	85132749	85133795	TMSB10	protein_coding	4.27732	2.15359	6.97489	5.41673	5.57305	4.73836	7.06564	6.0472	4.91051	6.15854	5.672	5.1719	4.84704	0	5.50644	2.50662	3.43365	6.18795	8.36803	5.81774	5.43826	8.63703	4.13316	3.55863	6.02848	2.73461	6.56436	4.05475	7.22934	4.26762	5.1447	6.02819	4.26281	2.89914	5.32026	4.39981	7.0968	7.68669	5.03537	4.04141	3.72568	6.78089	6.12243
ENSG00000166441	ribosomal protein L27a [Source:HGNC Symbol;Acc:10329]	11	8703958	8736306	RPL27A	protein_coding	8.383	6.66578	7.07132	5.93543	9.29569	6.06585	6.69423	7.03286	7.12762	7.49232	7.7385	6.63681	6.74794	7.16364	7.3452	6.57149	7.11211	7.38421	8.97177	9.00874	7.69174	7.09776	7.51504	8.19896	7.41005	8.00948	4.86443	8.55376	8.59522	7.06892	7.5925	9.50198	7.83958	8.6003	8.3535	8.18638	8.44569	9.10505	8.40498	6.58686	7.79383	7.20131	7.16696
ENSG00000141433	adenylate cyclase activating polypeptide 1 (pituitary) [Source:HGNC Symbol;Acc:241]	18	904944	912173	ADCYAP1	protein_coding	9.23412	0	0	0	0	0	0	0	0	0	6.98513	0	0	8.94975	0	9.85474	0	0	0	7.95551	0	0	0	0	0	5.34307	0	0	8.24934	2.55327	0	0	7.79207	7.90697	9.29337	0	0	7.81899	7.31635	5.51347	6.62696	0	0
ENSG00000150961	SEC24 family member D [Source:HGNC Symbol;Acc:10706]	4	119643978	119759838	SEC24D	protein_coding	5.6418	8.63784	4.75664	7.70303	8.33111	3.34708	7.90084	5.03201	6.58476	7.91406	6.96251	7.47804	6.74414	0.678291	8.62403	0	7.15556	5.29868	6.35357	5.4846	9.9333	3.85664	1.00001	5.82434	5.23603	7.57893	2.62733	0.508055	6.78121	3.71963	6.69767	6.76989	4.92003	6.33102	2.58306	5.73879	4.66615	4.24519	4.78327	2.24328	7.48085	5.13273	9.02862
ENSG00000115415	signal transducer and activator of transcription 1, 91kDa [Source:HGNC Symbol;Acc:11362]	2	191829084	191885686	STAT1	protein_coding	2.42729	3.77058	8.0551	0	5.74409	0	2.66136	6.77883	0	2.82869	6.7383	4.07848	6.43234	2.06596	0	9.0065	0	3.92731	3.10652	7.11215	6.57072	6.47482	7.16439	2.2596	3.55	9.0119	3.45704	5.1372	8.08112	6.39331	8.08389	7.40053	6.56326	2.31478	6.11518	7.85629	7.77874	0	0	3.27044	0	2.49768	5.99878
ENSG00000104341	lysosomal protein transmembrane 4 beta [Source:HGNC Symbol;Acc:13646]	8	98787285	98865241	LAPTM4B	protein_coding	7.81484	6.85133	3.3724	6.26745	9.27067	3.42753	6.69533	4.01566	7.66038	7.58947	4.07222	5.76005	7.54662	8.99056	7.1892	8.90315	6.77371	4.22112	2.71872	7.613	4.17402	7.29656	5.86532	4.16869	5.89735	3.69054	7.06141	3.25011	5.62713	7.02806	5.10736	2.8509	5.6219	6.70037	4.5904	4.9861	8.74763	3.65084	6.29865	2.39867	6.58461	10.5562	3.87922
ENSG00000167397	vitamin K epoxide reductase complex, subunit 1 [Source:HGNC Symbol;Acc:23663]	16	31102163	31107301	VKORC1	protein_coding	4.21064	3.8301	8.31584	8.93814	7.17802	4.7775	7.94844	5.06045	5.15518	7.05936	5.32621	7.32143	6.39819	8.2137	5.65726	6.10269	8.35971	5.41972	8.43091	5.74446	6.64151	8.06667	7.87539	5.60001	6.85411	6.12929	7.38042	8.218	5.57584	7.24174	6.96165	0	5.0124	5.8114	7.34703	8.83322	8.64834	5.06251	4.84161	5.94762	5.40171	5.55245	3.43426
ENSG00000120833	suppressor of cytokine signaling 2 [Source:HGNC Symbol;Acc:19382]	12	93963590	93977263	SOCS2	protein_coding	4.62326	0	9.01732	0	4.29587	0	0	0	0	7.39098	0	0	0	11.0465	0	7.42109	0	0	0	0	0	0	0	0	0	8.30906	0	0	0	2.55327	0	0	0	2.31478	5.03397	3.53404	0	0	2.35656	8.19541	2.48183	0	0
ENSG00000138085	all-trans retinoic acid-induced differentiation factor [Source:HGNC Symbol;Acc:24090]	2	27434895	27440046	ATRAID	protein_coding	7.98674	9.11386	9.2907	7.56216	9.50787	8.89687	7.42772	4.46333	5.88632	8.64791	5.68222	8.29836	4.82149	8.52168	6.45488	8.12458	7.51351	0	3.77488	0	8.32361	7.53626	6.54052	8.94866	8.69043	7.61978	6.65834	8.17228	7.40424	7.24753	7.31807	7.80561	7.61507	9.22229	8.54596	5.3277	8.42707	7.12421	7.28945	8.19259	7.32177	8.8213	7.23345
ENSG00000182872	RNA binding motif protein 10 [Source:HGNC Symbol;Acc:9896]	X	47004268	47046212	RBM10	protein_coding	0	0	4.43879	1.03992	2.11401	0	3.69403	6.01276	0	0	0	0.86005	0	0	0	2.75777	0	0	7.30221	0	1.88341	0	0	0	4.99448	0	0	2.60064	0	0	0	0	0	0	0	0	0	5.71045	0	0	2.83081	2.73998	0
ENSG00000162909	calpain 2, (m/II) large subunit [Source:HGNC Symbol;Acc:1479]	1	223889295	223963720	CAPN2	protein_coding	6.16002	1.95399	3.27432	8.54382	9.21859	2.05664	4.17486	2.29276	8.16066	4.88744	0	2.99957	0	2.59351	1.31992	1.05704	3.37577	5.17759	3.37068	2.35888	7.67028	8.29959	3.27232	9.1888	2.24967	6.76372	2.75261	0	9.71683	3.80001	5.11407	3.29272	6.95116	0	4.57125	1.03034	0	0.929904	2.52983	0.653344	9.01472	7.80206	8.38908
ENSG00000165672	peroxiredoxin 3 [Source:HGNC Symbol;Acc:9354]	10	120927215	120938345	PRDX3	protein_coding	9.29905	8.60465	9.28806	6.56977	4.44312	8.43778	9.35304	8.78783	7.65185	7.6259	9.70266	6.27918	8.44945	5.98251	6.05098	9.31956	8.54473	7.18599	8.70672	9.35434	9.55753	9.42698	8.13452	7.54187	8.49801	6.89148	7.62418	8.81644	6.60752	8.48722	8.89012	7.15077	6.6149	7.67998	8.78837	7.93327	8.86056	0.980032	9.97784	7.30128	2.4897	9.38639	9.51304
ENSG00000083845	ribosomal protein S5 [Source:HGNC Symbol;Acc:10426]	19	58897767	58906173	RPS5	protein_coding	7.88322	7.588	8.36616	6.8786	8.8128	8.16962	7.74375	5.76558	8.76174	7.38595	8.35275	8.98271	7.88474	6.60144	6.77978	4.91542	8.18586	6.25234	8.42003	8.042	7.99503	8.94259	9.26415	7.16471	7.79918	1.09164	8.77242	7.51515	7.76466	5.46656	8.83947	9.62485	7.81757	6.9625	8.33691	8.6602	9.03933	7.65005	5.15939	7.49179	8.01772	6.52151	7.77563
ENSG00000132669	Ras and Rab interactor 2 [Source:HGNC Symbol;Acc:18750]	20	19867165	19983101	RIN2	protein_coding	10.9104	9.59662	9.05039	9.48699	10.4545	7.52474	9.506	10.6046	8.7275	8.10718	8.69699	7.6779	6.59947	9.15592	7.25295	10.1707	7.38399	0	10.1229	7.58763	10.6714	6.90126	10.6054	7.57532	6.44843	9.44197	10.7017	9.73044	9.10218	7.74178	8.74309	7.99095	9.72261	7.87984	10.0506	9.72652	5.55966	8.68908	10.0771	8.13202	10.1391	7.21622	0.552999
ENSG00000123636	bromodomain adjacent to zinc finger domain, 2B [Source:HGNC Symbol;Acc:963]	2	160175490	160473203	BAZ2B	protein_coding	7.82626	6.69825	6.16988	6.40981	5.14546	6.53204	8.31619	6.42598	7.98354	8.07518	5.10082	5.57349	7.68666	8.84276	6.69046	8.12211	5.45424	10.4753	5.19671	4.05851	8.5596	5.01367	6.88539	4.37465	8.938	6.55673	7.852	4.01688	8.96564	6.31859	5.47688	8.34595	8.28261	7.08304	7.95544	8.42687	6.73419	6.52882	7.59888	5.70481	7.97031	8.76646	7.67121
ENSG00000198477	zinc finger protein 280B [Source:HGNC Symbol;Acc:23022]	22	22838767	22863505	ZNF280B	protein_coding	0	0	0	0	0.736204	2.10545	0	7.92591	1.19076	0	0	0	0	0	0	0	0	0	0	0	1.22942	0	0	0	0	0	0	9.14418	8.23133	0	0	4.37274	0.64953	5.82411	1.99872	10.2245	0	0	0	0	0	0	0
ENSG00000074319	tumor susceptibility 101 [Source:HGNC Symbol;Acc:15971]	11	18489883	18548779	TSG101	protein_coding	6.68693	0.940976	8.53931	2.63872	4.78824	7.69027	2.53031	4.68162	6.30048	7.43437	0	7.14573	3.53695	0.649268	0	6.58643	7.59595	5.27769	5.3961	2.71962	6.22805	3.92619	8.33036	8.52321	7.2503	0.722829	7.54692	8.27416	5.68569	6.8789	5.44932	1.3618	2.85902	0	5.15684	7.05851	9.54422	8.67726	3.86215	2.7502	0	0	1.94817
ENSG00000131849	zinc finger protein 132 [Source:HGNC Symbol;Acc:12916]	19	58944181	58951589	ZNF132	protein_coding	0	0	0	0	0	0	0	0	3.69735	0	0	0	0	0.614652	0	0	0	0	0	0	0	0	0	0	0	0	0	2.78865	0	0	0	0	0	0	0	0	0	0	0	0	0	0	0
ENSG00000163682	ribosomal protein L9 [Source:HGNC Symbol;Acc:10369]	4	39455744	39460568	RPL9	protein_coding	8.30195	7.24957	8.40854	7.15732	8.32492	8.45346	7.76835	7.76503	7.35802	7.35753	7.29629	8.07636	7.84009	7.12628	7.72102	8.39003	7.24239	8.39659	8.27883	8.91967	7.62491	7.93172	8.17326	8.40013	7.71514	7.26991	7.17851	8.33502	8.49851	8.0168	7.96235	8.3363	7.16548	8.25745	7.78331	8.30854	7.58066	8.1965	7.08948	7.6344	7.16525	7.17402	7.70678
ENSG00000090615	golgin A3 [Source:HGNC Symbol;Acc:4426]	12	133345495	133405444	GOLGA3	protein_coding	7.44753	8.05408	7.82128	8.07124	0	2.30293	6.82438	6.56611	4.13493	6.74585	1.74448	9.13568	5.15951	7.58232	1.93743	0	9.2145	3.65019	9.66085	6.93251	6.5356	8.97391	6.88758	0.20357	6.49957	6.59107	3.80353	1.68346	3.1782	8.99302	5.9241	6.04568	3.41048	4.46557	7.86198	4.97109	0	7.5116	7.40828	3.39586	6.00955	9.56246	1.31623
ENSG00000067225	pyruvate kinase, muscle [Source:HGNC Symbol;Acc:9021]	15	72491370	72524164	PKM	protein_coding	6.827	8.01751	10.039	6.70005	7.38181	7.36045	7.38025	4.24333	7.2913	7.73675	7.9374	8.53073	8.29306	2.8825	6.47025	7.33036	8.56289	6.88331	7.16609	9.32458	9.02255	9.86891	7.9695	8.18474	7.95432	8.51044	7.99887	3.23919	5.80002	7.59507	7.74085	7.07293	4.38917	4.63527	7.6262	9.77351	5.84844	9.19936	6.50912	6.75643	4.27383	8.58371	7.42602
ENSG00000102837	olfactomedin 4 [Source:HGNC Symbol;Acc:17190]	13	53602894	53626192	OLFM4	protein_coding	0	0	2.8086	0	0	0	0	0	0	0	0	0	0	0	0	0	0	0	0	0	0	0	0	0	0	0	0	0	0	0	0	0	0	0	0	0	0	0	0	0	0	0	0
ENSG00000148303	ribosomal protein L7a [Source:HGNC Symbol;Acc:10364]	9	136215069	136218281	RPL7A	protein_coding	9.47509	8.3428	8.25726	7.28282	9.28427	8.47211	8.54533	8.57218	9.16264	7.53782	8.21923	8.78048	9.28905	6.81442	8.96412	8.21996	6.86667	4.50708	9.29067	9.89228	8.30839	6.48365	8.79722	8.80283	6.76496	8.46959	8.00604	8.85428	9.88178	8.89551	8.59787	0.790987	8.2698	10.5326	9.47646	8.38658	9.32467	5.71045	9.11033	6.85966	4.6701	7.84407	8.60921
ENSG00000155657	titin [Source:HGNC Symbol;Acc:12403]	2	179390716	179695529	TTN	protein_coding	5.08052	4.8664	8.4114	1.03992	7.29273	0	7.85633	0	0	6.53635	2.20855	5.0389	0	3.32628	0.701468	0	7.06281	0	0	3.76243	2.94928	0	1.65915	0	6.48948	1.7059	2.60786	0	0	1.49882	0.636405	8.12152	3.62914	4.87767	3.90337	4.43553	0	0	0	3.42462	0	0.600669	0
ENSG00000114861	forkhead box P1 [Source:HGNC Symbol;Acc:3823]	3	71003844	71633140	FOXP1	protein_coding	9.58861	7.05073	5.18463	1.94741	7.99622	7.02852	2.74083	6.97942	8.7202	8.08872	7.46786	3.74347	7.67989	6.15997	0.274725	2.66413	8.62861	8.24238	7.77148	5.7693	1.22942	5.35315	8.75952	7.50571	1.53131	6.39656	7.52803	5.52882	7.95744	8.09047	7.42829	8.01908	6.82861	1.7865	5.83253	8.22879	7.88237	0	4.84693	0.653344	6.33076	7.82448	8.29774
ENSG00000160613	proprotein convertase subtilisin/kexin type 7 [Source:HGNC Symbol;Acc:8748]	11	117075053	117103241	PCSK7	protein_coding	6.83864	7.92703	4.3822	4.07533	8.03274	4.52632	8.0734	6.66002	4.98544	7.68695	4.69297	6.5755	5.54853	8.03742	4.59465	4.02986	6.36083	7.5366	6.95291	4.05407	6.90303	8.99658	6.55107	8.4907	7.64897	7.99784	6.24285	4.30232	8.88366	6.31473	7.49375	7.00459	6.19695	5.42272	6.91595	5.72326	3.71806	7.44292	6.45264	8.53432	7.74614	4.64612	8.205
ENSG00000140259	microfibrillar-associated protein 1 [Source:HGNC Symbol;Acc:7032]	15	44096690	44117000	MFAP1	protein_coding	6.78751	7.61389	8.79478	0	0	0	4.81092	0	0	2.90572	4.73969	7.11637	0	0	6.00545	0	0	4.8791	0	0	3.4706	0	2.75606	2.16902	3.76587	4.69407	0	0	6.98802	8.45535	0	0	0	0	7.16622	3.32139	0	3.67672	0	0	6.33076	0	7.54987
ENSG00000118946	protocadherin 17 [Source:HGNC Symbol;Acc:14267]	13	58205944	58303445	PCDH17	protein_coding	7.93347	6.27539	5.74737	9.24229	5.96006	9.24112	8.30505	8.07315	1.19076	7.60599	2.97856	7.4277	7.39827	5.12912	8.61484	5.5579	9.06706	0	0	0	7.17877	0	8.24395	10.0848	8.24244	7.13646	8.6927	4.6715	4.56323	6.16208	7.6402	3.3914	7.0668	4.84935	8.17622	8.42592	6.18708	6.50928	6.49035	8.71723	2.02054	5.29333	3.37053
ENSG00000113048	mitochondrial ribosomal protein S27 [Source:HGNC Symbol;Acc:14512]	5	71515236	71616473	MRPS27	protein_coding	5.84889	2.7361	0	1.30335	1.04167	0.659846	0.624229	0.511054	0.522187	5.53986	0	0	0	1.52627	0	0	1.54363	3.25853	7.59591	3.71412	9.11281	0	3.12187	0.385157	2.29669	2.23579	0.711054	6.01144	0	8.37422	3.70578	7.6663	1.47208	0.736267	4.83902	2.33732	0.651255	0	0	0	4.89281	0	0
ENSG00000151914	dystonin [Source:HGNC Symbol;Acc:1090]	6	56322785	56819426	DST	protein_coding	10.2423	6.25685	2.43592	3.46377	7.65789	7.98647	8.72061	6.9428	6.86177	7.85421	1.63434	8.05807	4.29672	10.9001	8.28016	10.0593	7.22131	8.59982	7.98641	2.74389	7.82857	3.76222	10.4484	6.77298	8.54528	10.7057	7.45018	7.25285	9.92648	9.61174	9.20481	6.21705	8.75244	10.2848	9.23838	9.79474	5.66768	7.75275	10.0853	8.51886	9.6488	1.00134	9.66771
ENSG00000167881	signal recognition particle 68kDa [Source:HGNC Symbol;Acc:11302]	17	74035184	74068734	SRP68	protein_coding	1.85889	2.3173	0.654352	0.611701	0	0	2.71657	1.13571	0.914632	0.613066	7.93527	0	0.710555	1.36307	2.06597	0	5.45058	8.4973	0.616275	3.07884	8.51607	0	0.480979	2.45629	2.03354	1.90639	2.27153	1.86995	0	5.48628	0	0.18745	1.8475	0	0.677432	7.24128	0	0	7.61881	2.65894	0	5.3558	0.965655
ENSG00000185559	delta-like 1 homolog (Drosophila) [Source:HGNC Symbol;Acc:2907]	14	101192042	101201539	DLK1	protein_coding	0	0	0	0	0	0	0	0	0	0	0	0	0	7.87482	0	0	0	0	0	0	0	0	0	0	0	6.76102	0	0	0	0	0	0	0	0	0	0	0	0	0	0	0	0	0
ENSG00000173418	N(alpha)-acetyltransferase 20, NatB catalytic subunit [Source:HGNC Symbol;Acc:15908]	20	19997760	20014299	NAA20	protein_coding	8.9701	9.36845	10.0057	9.99756	9.88532	9.45465	7.55533	9.64824	8.24459	8.30244	5.5322	8.14479	4.74203	7.98176	9.26285	7.25411	7.82764	7.37254	6.36117	10.3815	10.4944	8.09288	9.48984	10.2668	9.1453	7.50319	8.90313	8.14673	6.89959	7.79019	8.70909	0	8.95837	8.26721	9.11412	9.57261	7.1728	8.62898	6.71719	8.06879	5.11399	4.65945	9.13329
ENSG00000075213	sema domain, immunoglobulin domain (Ig), short basic domain, secreted, (semaphorin) 3A [Source:HGNC Symbol;Acc:10723]	7	83585093	84122040	SEMA3A	protein_coding	0	0	0	0	0	0	0	0	0	0	0	0	0	0	0	0	0	0	1.59939	0	0	0	0	0	0	6.29433	0	0	0	0	0	1.29896	0	0	3.6307	0	0	0	0	0	0	0	0
ENSG00000253719	ataxin 7-like 3B [Source:HGNC Symbol;Acc:37931]	12	74931551	74935223	ATXN7L3B	protein_coding	6.05923	6.09932	7.6856	0	3.6243	4.89267	3.69403	0	6.52473	4.88134	6.06442	0	0	5.9121	6.0741	5.30957	7.07685	0	7.59512	3.25451	6.07818	4.98135	7.59205	8.37912	6.01449	8.06888	5.1194	8.735	7.75635	2.44131	7.91003	0	5.00526	8.73086	6.74835	2.90762	3.88684	5.11603	10.1597	8.85389	6.18682	0	8.25756
ENSG00000092201	suppressor of Ty 16 homolog (S. cerevisiae) [Source:HGNC Symbol;Acc:11465]	14	21819631	21852425	SUPT16H	protein_coding	7.9433	6.92948	8.65137	2.23318	3.21863	6.47687	7.65256	8.03948	0.447253	8.73675	4.17184	5.21116	4.70981	9.62762	4.25992	9.03551	4.97581	7.82373	8.81741	5.98009	3.86009	6.39663	6.74614	2.70158	5.45204	1.44026	6.06923	2.49658	6.68905	7.76008	7.49699	6.27969	7.49059	1.04154	8.52057	1.48777	5.6626	8.65287	7.94595	8.86128	2.03137	6.5539	10.4132
ENSG00000198830	high mobility group nucleosomal binding domain 2 [Source:HGNC Symbol;Acc:4986]	1	26798941	26802463	HMGN2	protein_coding	8.91939	6.59127	8.81413	8.96277	9.50268	8.73815	6.60335	9.60044	8.17766	8.58698	7.83811	8.10476	9.16564	7.81138	7.00117	9.01342	8.11973	9.02099	8.81587	6.61922	9.15771	8.93002	9.48034	7.97018	9.40123	7.49407	9.25092	7.7572	10.0368	10.1087	9.13213	10.089	9.09954	8.77072	10.0557	9.49527	8.3463	9.7905	8.0757	7.50786	8.16422	9.77184	10.4482
ENSG00000175197	DNA-damage-inducible transcript 3 [Source:HGNC Symbol;Acc:2726]	12	57910371	57914300	DDIT3	protein_coding	8.42935	4.27773	8.22866	5.28615	0	7.13791	6.63986	0.831864	0	0.584514	3.36124	5.55622	0	0	0	2.08474	7.51154	9.04013	7.20973	6.39015	7.94403	3.70234	9.44736	5.6592	0	7.8909	6.18844	6.52109	10.0951	9.44796	9.04062	0	8.0918	0.581988	7.34118	7.19503	0	3.57845	7.11047	0	5.72724	8.77334	0
ENSG00000170677	suppressor of cytokine signaling 6 [Source:HGNC Symbol;Acc:16833]	18	67956137	67997436	SOCS6	protein_coding	0	6.12901	2.11659	4.02802	7.75966	7.00406	1.76063	0	0	4.32065	0	3.76914	1.81784	6.63328	0	6.18356	6.97559	0	0	0	3.0697	0	0	0	2.73799	6.3454	0	1.42681	6.47142	2.55327	1.41324	5.99553	0	3.23993	0	4.20659	7.26963	3.2988	7.22845	3.99033	2.02054	6.28441	3.55386
ENSG00000117676	ribosomal protein S6 kinase, 90kDa, polypeptide 1 [Source:HGNC Symbol;Acc:10430]	1	26856252	26901521	RPS6KA1	protein_coding	0	5.53656	0	0	0	0	0	0	0	0	0	0	0	0	0	3.15783	0	0	0	0	0	0	0	0	0	0	0	0	0	0	0	0	0	0	0	0	0	0	0	0	0	6.74661	2.09421
ENSG00000100941	pinin, desmosome associated protein [Source:HGNC Symbol;Acc:9162]	14	39644387	39652422	PNN	protein_coding	4.21064	6.26464	2.93986	5.07638	5.04255	1.97683	5.51048	7.02334	0	7.25133	6.10294	7.15813	0.719433	0	4.57621	3.09839	3.67425	9.38957	5.73542	3.15622	5.34587	2.09673	5.5994	0	6.00036	7.40068	1.18523	5.84713	8.76001	9.01961	4.89876	6.16661	3.98049	7.46664	3.69886	3.53404	0.903844	0	5.84607	5.58407	7.89449	10.1733	8.865
ENSG00000101577	lipin 2 [Source:HGNC Symbol;Acc:14450]	18	2916992	3013313	LPIN2	protein_coding	9.52739	4.74793	0	0	2.39717	7.06398	6.151	4.95556	0	0	0	7.56133	0	0	0.95549	0	7.98481	8.11765	5.43047	0	2.12493	5.86677	0	6.01194	2.43592	7.63217	6.55462	0	1.7478	3.65138	6.31709	1.67391	4.73279	7.52638	5.48376	0	0	0	0	0	7.37589	0	5.67195
ENSG00000102226	ubiquitin specific peptidase 11 [Source:HGNC Symbol;Acc:12609]	X	47092089	47107727	USP11	protein_coding	4.40208	5.51858	5.15791	3.24016	3.4577	5.40854	8.43353	6.89212	6.05354	6.0099	7.25518	5.41177	2.81993	5.84061	6.22059	8.01434	2.63909	0	3.26725	0.949474	8.80775	7.56983	2.41051	7.87663	2.59485	6.40439	2.06523	9.26887	10.3354	8.01052	4.09416	6.16661	6.01546	3.63563	7.10474	4.57018	0	1.63459	5.58804	2.48091	7.11459	0	0
ENSG00000104635	solute carrier family 39 (zinc transporter), member 14 [Source:HGNC Symbol;Acc:20858]	8	22224762	22291642	SLC39A14	protein_coding	6.28664	0	0	2.76737	0	6.15928	0	8.15043	0	7.91155	0.44595	3.25679	5.5535	6.65626	0	0	0	0	8.58567	8.24838	3.55555	4.87795	0	4.62093	3.38576	6.81998	0	6.85574	0	3.9643	1.07649	4.37274	4.85121	6.02462	2.67663	1.04151	0	4.34809	3.38136	0	0	0	0
ENSG00000166734	cancer susceptibility candidate 4 [Source:HGNC Symbol;Acc:24892]	15	44580927	44707956	CASC4	protein_coding	7.37886	8.31846	8.74576	6.09941	6.33059	3.24186	8.51258	7.1566	3.44152	8.2472	6.68613	5.53368	8.22606	8.22632	7.42903	3.32687	8.27143	6.18894	5.29361	3.30636	7.9047	3.61435	4.575	7.21006	8.43738	7.13791	8.4531	8.05396	4.61219	8.56832	6.97023	7.28861	8.30189	6.49379	8.77076	9.04166	3.43635	6.71325	6.38259	3.21367	7.34922	8.29028	7.58921
ENSG00000138772	annexin A3 [Source:HGNC Symbol;Acc:541]	4	79472673	79531597	ANXA3	protein_coding	0	0	0	0	1.22131	0.591207	0	0.5071	0	6.04536	0	0	1.33941	1.96358	0	0	0	1.75111	2.2154	0.945992	1.52738	1.48675	2.50679	0	0	1.9535	1.90269	1.66052	0	0.436213	4.03927	0	1.31278	1.73143	7.52656	0	0	0	0	1.6753	2.02597	0	1.61356
ENSG00000137817	poly (ADP-ribose) polymerase family, member 6 [Source:HGNC Symbol;Acc:26921]	15	72533522	72565340	PARP6	protein_coding	2.53694	3.31818	0	3.2681	2.12065	3.55779	7.11652	5.60411	1.58548	3.37313	1.31118	4.54938	9.5302	6.26035	3.50228	0	6.58994	3.50475	3.15583	2.32845	8.54167	1.01929	3.19849	5.20252	7.91595	5.71615	6.81811	3.074	2.87476	3.87434	3.72103	4.60173	3.51895	2.17889	3.0214	3.25497	0.627049	2.77739	3.93338	2.31312	4.61806	6.14955	2.85803
ENSG00000145390	ubiquitin specific peptidase 53 [Source:HGNC Symbol;Acc:29255]	4	120133742	120216672	USP53	protein_coding	4.74604	0.655252	6.70649	0	0	1.30342	4.63719	0	1.43846	0	0	3.05934	2.59719	0	0	2.67881	0	0	0	0	1.88341	0	1.28621	2.45015	0	0	0	0	0	0	2.43358	9.13776	7.3792	0	0.677432	4.86033	1.0292	4.66778	0	0	0	0	2.98092
ENSG00000079739	phosphoglucomutase 1 [Source:HGNC Symbol;Acc:8905]	1	64058947	64125916	PGM1	protein_coding	4.10447	5.93931	6.68793	7.26807	0	0	6.151	0	0	6.08614	1.66597	0	2.01101	0	5.97705	8.79815	0	0	0	0	2.51262	0	0	0	0	0	6.54481	0	0	0.685898	5.80453	5.3669	6.63485	3.16198	0	2.52675	0	0	0	0.653344	3.15928	1.35008	0
ENSG00000197747	S100 calcium binding protein A10 [Source:HGNC Symbol;Acc:10487]	1	151955391	151966866	S100A10	protein_coding	0	6.16414	5.93216	7.34974	6.8436	6.08322	3.16375	0	2.61611	5.91754	0	6.77894	0	5.08465	2.04642	0	6.74006	0	0	0	6.3638	0	6.64792	2.34484	5.57385	0	0	0	0	1.14887	6.14692	0	0	5.36631	0	0.61277	6.25447	8.82251	0	4.09074	0	7.73639	4.4608
ENSG00000072042	retinol dehydrogenase 11 (all-trans/9-cis/11-cis) [Source:HGNC Symbol;Acc:17964]	14	68143518	68162531	RDH11	protein_coding	6.7232	8.42152	6.91815	4.53472	2.93694	3.49531	8.52464	8.32694	0.51357	8.73589	8.57998	7.72868	2.33367	8.75951	6.78073	7.81137	2.63909	4.60946	8.84791	8.94034	5.08516	9.00691	3.37193	6.40824	8.32697	6.91094	8.96672	6.66643	9.12916	5.97929	7.18521	5.3112	1.0958	6.97908	8.99038	3.88404	7.59294	7.8744	8.68227	2.14954	7.41518	7.57384	8.06213
ENSG00000128266	guanine nucleotide binding protein (G protein), alpha z polypeptide [Source:HGNC Symbol;Acc:4395]	22	23412540	23467224	GNAZ	protein_coding	5.70686	2.32891	7.01266	5.57405	2.32041	7.53048	4.5124	7.04053	4.93047	0	0	4.96156	1.33074	7.49619	8.13274	6.90458	0	0	0	3.90376	6.42152	0	3.39283	6.06314	6.14868	6.76102	3.96818	5.71784	2.25506	6.5594	2.9361	6.38479	6.01407	8.01623	4.98102	1.8663	3.50769	0	6.5606	0	9.37614	6.1649	3.64556
ENSG00000163191	S100 calcium binding protein A11 [Source:HGNC Symbol;Acc:10488]	1	152004982	152020383	S100A11	protein_coding	8.13118	3.08297	6.3531	7.63384	3.83953	7.05672	6.08485	5.40392	5.91728	6.71977	6.37889	4.88404	6.74923	3.24778	3.46186	3.80404	7.21656	7.18633	10.1379	8.04215	3.0697	8.9443	7.43417	6.50945	7.66285	2.46588	0	0	4.80149	7.02961	5.87438	7.61992	2.74127	6.79204	5.20779	7.95804	5.50536	5.722	6.09003	6.24865	1.33838	6.5539	2.09421
ENSG00000145476	cytochrome P450, family 4, subfamily V, polypeptide 2 [Source:HGNC Symbol;Acc:23198]	4	187112674	187134610	CYP4V2	protein_coding	5.94994	8.61845	3.86065	5.06754	5.81541	4.9058	8.55376	6.22169	4.02896	7.82333	4.83797	8.02922	4.97489	5.53739	2.86773	9.49832	5.69771	6.78938	8.79737	5.02284	5.71193	5.92045	7.30768	3.6705	8.35914	7.25022	7.15446	3.60571	8.40532	5.80961	8.75552	7.2054	7.54888	7.37049	7.3827	5.97886	3.33601	5.39611	6.61153	8.80221	7.45921	5.75379	5.15685
ENSG00000152952	procollagen-lysine, 2-oxoglutarate 5-dioxygenase 2 [Source:HGNC Symbol;Acc:9082]	3	145787227	145881440	PLOD2	protein_coding	0.907477	0	7.83222	4.74819	0	3.49531	7.64414	5.71367	0.51357	4.61342	7.66614	1.78463	5.40663	5.01525	0	2.67881	7.6228	2.9349	8.11953	3.99084	0.741889	11.261	6.82314	8.88071	4.67673	8.51971	4.18579	1.82081	0.557475	7.03671	6.98078	6.27942	6.28112	4.96862	3.23113	4.20659	5.2651	6.45493	7.63967	7.42853	4.27383	4.25359	7.26884
ENSG00000186318	beta-site APP-cleaving enzyme 1 [Source:HGNC Symbol;Acc:933]	11	117156402	117186975	BACE1	protein_coding	7.37574	5.13468	6.45429	5.75619	9.17034	6.05451	5.88673	6.89387	2.66167	4.72989	5.76459	6.32214	8.54184	4.76149	7.70251	5.33876	2.43624	5.18523	5.46569	2.50567	7.13803	9.21068	2.71713	10.4447	7.36289	9.29238	5.14195	1.84304	2.89045	7.89485	7.38665	4.3574	8.98439	6.78523	6.27243	2.14531	0.903844	8.98862	4.92086	8.62251	3.88344	4.46536	8.79854
ENSG00000152234	ATP synthase, H+ transporting, mitochondrial F1 complex, alpha subunit 1, cardiac muscle [Source:HGNC Symbol;Acc:823]	18	43664110	43684300	ATP5A1	protein_coding	9.18207	8.13882	9.83504	10.163	7.80516	9.28063	7.72974	8.95905	9.07827	8.76985	9.0661	9.01057	9.7329	7.09383	7.72331	9.20472	8.99348	9.31891	8.5289	7.31833	6.02212	6.7106	9.00004	9.08942	8.55217	8.98398	4.37039	6.85988	6.97656	7.79265	8.60362	5.26674	9.53801	8.91146	9.32419	10.5344	10.3113	10.6948	9.90074	8.81942	5.74503	9.66388	9.08976
ENSG00000075336	translocase of inner mitochondrial membrane 21 homolog (yeast) [Source:HGNC Symbol;Acc:25010]	18	71815746	71826197	TIMM21	protein_coding	1.21017	0.691654	0	0	0	0	3.93836	6.76359	0	1.47422	0.487542	0	1.01097	0	0	5.97945	0	0	6.44936	0	1.69853	5.14619	0	4.95514	7.04519	5.15114	0	0.508055	0.575853	0.685898	0	0	0.65475	0.586769	0	8.74701	0.521576	4.15704	1.74637	1.95011	0	0	5.77671
ENSG00000102265	TIMP metallopeptidase inhibitor 1 [Source:HGNC Symbol;Acc:11820]	X	47441712	47446188	TIMP1	protein_coding	8.27067	8.78583	8.06932	7.66709	8.25392	4.99235	7.83732	7.43126	7.46893	8.54169	6.88257	9.66683	8.48018	8.19813	7.93598	7.66337	1.20624	5.2076	12.9965	8.00864	8.01411	12.0616	7.03582	9.1866	8.97328	8.72425	8.68826	8.43765	7.8878	7.17646	7.31807	8.15886	8.76638	8.37479	8.56891	8.00338	9.37475	7.93273	7.09813	8.21223	8.46187	8.81965	8.61982
ENSG00000136122	bora, aurora kinase A activator [Source:HGNC Symbol;Acc:24724]	13	73302061	73330336	BORA	protein_coding	0	7.89083	0	0	0	0	0	0	0	0	0	0	0	0	0	0	2.29926	0	0	0	0	0	7.71175	0	0	0	0	0	0	0	0	0	4.77655	0	2.92452	0	0	0	4.61773	0	0	0	0
ENSG00000109814	UDP-glucose 6-dehydrogenase [Source:HGNC Symbol;Acc:12525]	4	39500375	39529931	UGDH	protein_coding	6.54754	4.88139	3.97098	0	7.30918	6.71902	6.53724	6.11192	7.52905	6.95216	7.41639	5.69854	0	1.38083	1.69951	0.416844	7.36644	6.83701	7.67654	0.551476	2.20074	1.0386	6.60069	4.6607	4.69755	6.49628	2.74578	6.08218	2.73967	6.07462	7.07325	1.32021	1.1706	6.71388	5.81957	2.39651	2.16484	5.04311	0.473628	4.44617	5.21482	1.54395	5.41903
ENSG00000089280	fused in sarcoma [Source:HGNC Symbol;Acc:4010]	16	31191431	31203127	FUS	protein_coding	1.63108	7.55336	0	3.53122	4.85614	1.50344	4.0114	5.8853	1.89673	3.24672	0	6.06659	5.9213	0	0.392954	0	4.98804	7.41557	5.9019	2.24022	8.28058	3.76164	2.17799	3.28479	2.59485	7.00007	7.66029	3.36273	7.32581	3.13209	1.88326	3.3914	4.60377	0	4.80756	4.36318	0	3.10064	0	7.14301	2.83081	8.23381	0.557585
ENSG00000128641	myosin IB [Source:HGNC Symbol;Acc:7596]	2	192109911	192290115	MYO1B	protein_coding	4.56119	5.56347	2.80997	5.77774	4.13844	3.62971	5.76401	4.15134	7.17659	3.65526	0	1.39741	2.33511	3.07667	5.80328	5.60137	6.90652	0.883204	7.69277	4.80756	5.58693	8.11295	4.17455	0.701838	6.25963	6.45176	3.02516	2.38441	1.34353	2.0563	3.51535	1.32442	4.30493	6.04648	1.13263	7.20542	1.87397	9.36142	3.46065	2.14954	1.33838	5.21526	5.79843
ENSG00000162434	Janus kinase 1 [Source:HGNC Symbol;Acc:6190]	1	65298912	65432187	JAK1	protein_coding	8.1424	2.98161	5.23662	6.37242	4.02796	9.19217	6.63986	9.07256	5.00958	6.9353	6.0408	3.6336	0	7.96345	7.89862	5.87369	0	1.81078	10.0237	8.47671	0	6.00816	0	6.17211	7.7329	8.64493	0	5.2694	7.78973	4.01949	7.34292	0	7.71607	6.71906	8.1521	0.61277	4.13339	6.52256	9.13924	1.10139	6.51084	7.06863	6.94159
ENSG00000105220	glucose-6-phosphate isomerase [Source:HGNC Symbol;Acc:4458]	19	34850385	34893061	GPI	protein_coding	10.1571	9.3647	10.1016	7.43819	7.45819	6.92365	9.39834	8.9441	6.38195	8.96967	9.54038	8.25993	6.00856	10.0365	6.52257	7.90144	8.6321	6.75462	8.49018	9.00672	7.47404	9.42306	5.1123	8.83581	8.05001	5.84197	9.20891	8.23016	7.19236	6.58963	8.2151	4.98108	8.85887	7.29055	9.92777	11.2787	7.53372	5.13759	8.43754	8.44329	6.84407	9.59698	8.66392
ENSG00000013375	phosphoglucomutase 3 [Source:HGNC Symbol;Acc:8907]	6	83870869	83903655	PGM3	protein_coding	7.45443	6.81893	7.84902	6.84606	7.57559	0	4.68932	0	1.6498	1.34117	4.07688	8.36764	4.01375	4.08018	4.94217	8.32425	8.85684	7.6256	7.19201	4.68235	7.19872	7.73429	6.07569	1.29699	7.0367	8.74461	7.97076	4.41194	9.3816	8.74677	2.71517	1.29896	8.53824	0	6.5432	2.64254	0	4.61918	3.1134	6.49932	0	6.53539	4.07746
ENSG00000133313	CNDP dipeptidase 2 (metallopeptidase M20 family) [Source:HGNC Symbol;Acc:24437]	18	72163051	72188366	CNDP2	protein_coding	6.50247	5.04684	7.09116	7.79334	5.45713	7.13949	5.82687	5.5736	2.87429	8.19973	9.48095	0.35291	8.16714	1.94976	3.84954	7.64531	9.21665	5.1236	4.35322	2.88697	8.01969	1.72946	2.56407	5.95255	4.14818	7.13773	0.189211	6.91956	0.272076	0.685898	8.03117	8.63312	6.15589	3.94583	5.82873	0.622721	2.18709	7.1671	5.15129	0.976766	1.67175	11.0466	3.84867
ENSG00000138161	CUB and zona pellucida-like domains 1 [Source:HGNC Symbol;Acc:17937]	10	124591665	124639146	CUZD1	protein_coding	0	0	0	0	0	0	0	0	0	0	0	0	0	0	0	0	0	0	0	0	0	0	0	0	0	0	0	0	0	0	0	0	0	0	0	0	0	0	0	0	0	0	0
ENSG00000168000	Berardinelli-Seip congenital lipodystrophy 2 (seipin) [Source:HGNC Symbol;Acc:15832]	11	62457747	62477317	BSCL2	protein_coding	6.79322	8.68263	6.99767	7.74728	6.03521	9.10613	9.07255	8.66364	8.19283	8.68939	7.49711	8.97003	7.28135	0	7.85246	0	7.64653	3.92731	0	6.46048	7.63914	0	8.48027	7.46066	6.19905	5.30415	8.13259	8.44116	4.89594	6.76475	8.89867	7.80089	6.73066	6.52254	0	8.34135	5.24866	9.96765	7.77868	5.90688	5.685	9.9602	7.1362
ENSG00000076685	5'-nucleotidase, cytosolic II [Source:HGNC Symbol;Acc:8022]	10	104845940	104953056	NT5C2	protein_coding	0	2.92595	2.38522	7.85328	6.99774	2.08687	2.21116	3.70088	1.853	1.64755	1.06368	0.888913	1.76736	3.43585	0	0	4.07594	0.965811	2.05374	2.92461	3.42977	0.461424	2.16648	6.71848	3.86778	4.09036	7.07217	0	0.575853	1.445	9.2124	4.70673	6.30953	0.605737	3.73112	2.234	1.2193	8.39536	1.63864	3.72193	7.52079	9.47278	7.74196
ENSG00000136238	ras-related C3 botulinum toxin substrate 1 (rho family, small GTP binding protein Rac1) [Source:HGNC Symbol;Acc:9801]	7	6414154	6443608	RAC1	protein_coding	6.08737	7.14821	3.6227	4.24443	7.85816	6.80061	7.64414	5.59063	5.13776	4.95289	4.5295	4.07848	5.29969	8.16913	0	7.11857	7.75528	5.03439	8.8449	4.96638	6.10662	8.88052	5.06068	6.20097	7.0792	1.93655	6.15117	4.95286	7.15011	3.05388	4.14025	7.61992	3.62914	7.52249	0	6.4028	6.20422	0	4.22215	6.28089	7.90373	5.71814	3.76687
ENSG00000101608	myosin, light chain 12A, regulatory, non-sarcomeric [Source:HGNC Symbol;Acc:16701]	18	3247479	3256234	MYL12A	protein_coding	7.73299	6.24859	4.66966	7.10626	5.55314	7.43018	5.91936	6.4392	2.14425	4.38415	0	0.282145	4.10423	6.62593	2.91221	2.31418	7.91311	0.876649	9.76789	6.56846	8.12677	9.67688	2.40856	4.23984	7.67117	5.95058	1.85013	6.9127	7.79822	6.99986	3.77695	3.19832	7.91569	8.73895	2.39368	7.9113	0.897112	0	3.58619	1.31242	5.65292	0	8.23709
ENSG00000118680	myosin, light chain 12B, regulatory [Source:HGNC Symbol;Acc:29827]	18	3261907	3278282	MYL12B	protein_coding	8.57337	7.94774	9.85824	8.82001	6.37293	9.81758	6.89364	6.55239	7.57046	6.82591	4.85251	7.04692	8.72079	6.47447	8.36399	6.68109	10.3364	8.64322	9.36784	9.36619	7.87116	9.38488	9.35686	8.7075	7.04808	8.9355	8.31391	8.80605	8.99018	6.16208	8.58984	8.27218	8.63455	9.53041	9.29976	9.7611	7.25736	9.50542	7.84683	5.6839	0	6.05713	8.71392
ENSG00000100129	eukaryotic translation initiation factor 3, subunit L [Source:HGNC Symbol;Acc:18138]	22	38244875	38285414	EIF3L	protein_coding	9.38581	6.27785	8.22177	7.28859	5.37619	6.0082	7.80733	7.92234	3.27179	8.21342	9.90465	6.6423	6.72849	2.84992	3.19467	9.60103	4.00957	4.81541	8.91298	6.59233	7.73368	7.30152	7.28689	9.40834	3.4922	8.77227	8.0796	9.30378	8.69047	8.58547	7.78867	9.70022	4.29116	4.8915	7.24659	6.02132	6.63672	8.1386	9.94183	8.2421	4.95101	5.46373	4.7831
ENSG00000121892	PDS5, regulator of cohesion maintenance, homolog A (S. cerevisiae) [Source:HGNC Symbol;Acc:29088]	4	39824483	39979576	PDS5A	protein_coding	6.26117	1.44608	6.82161	0	4.82259	4.3281	7.49357	0	0	6.11137	8.80141	5.97608	5.49006	0	7.73864	0.44384	4.22105	4.68362	7.34626	7.7192	3.0697	6.18136	2.59361	0	4.15176	3.40801	8.54306	5.2365	0.767925	7.4552	4.91688	0.790987	4.67037	0	4.61354	3.93435	7.73833	0	1.46798	0.653344	3.31587	0	8.27507
ENSG00000154380	enabled homolog (Drosophila) [Source:HGNC Symbol;Acc:18271]	1	225674537	225840844	ENAH	protein_coding	7.90931	2.15359	0	0	0	5.58437	7.05704	0	0	0	7.82667	2.65493	6.72188	0	0	7.70381	6.68613	0.486798	7.5989	0	7.0347	10.4916	2.08075	0	0	8.15442	1.18523	0	6.93339	5.36368	5.1226	9.21956	6.54106	7.57231	5.61304	4.91196	4.26993	0.506906	1.97963	6.01306	4.38355	0	2.24399
ENSG00000116678	leptin receptor [Source:HGNC Symbol;Acc:6554]	1	65886248	66107242	LEPR	protein_coding	1.26377	0	1.85438	0	0.747691	0	0.844913	0	0	4.35627	0	0	0	0	2.15182	0	7.5006	7.05723	0	0	1.97261	1.746	0	0.36897	0	1.8464	1.32017	0.883044	0	0	0	7.5194	0	0	0.677432	0	1.62784	0	0	0	0	0.600669	1.1801
ENSG00000078304	protein phosphatase 2, regulatory subunit B', gamma [Source:HGNC Symbol;Acc:9311]	14	102228135	102394326	PPP2R5C	protein_coding	9.24566	8.57155	5.54985	8.95586	8.29018	8.19736	7.80968	8.3131	9.28523	7.71115	7.63945	8.44263	6.16125	6.88348	7.06423	9.79383	7.29936	7.01262	8.78927	0.485842	7.25898	5.34677	9.14591	7.37296	8.51282	8.1328	4.93312	9.20149	9.45847	7.26636	9.33622	4.47434	6.79043	9.19628	9.69523	9.01575	7.06477	3.94666	6.87387	8.26342	9.45405	8.85983	7.43621
ENSG00000137171	kinesin light chain 4 [Source:HGNC Symbol;Acc:21624]	6	43008515	43042837	KLC4	protein_coding	4.44534	5.22438	2.2297	3.8739	3.41241	4.80541	4.95379	4.35505	3.60456	4.53818	7.88754	3.93632	4.25725	4.74501	2.44347	8.78197	5.18495	5.08857	4.25694	4.47236	4.74336	5.27857	5.4604	4.21968	6.92413	5.55576	4.8944	2.86921	3.93873	4.41404	4.68809	5.21492	4.90231	3.36069	4.18963	3.35983	2.43147	10.6172	5.90722	3.89689	4.0775	3.03543	4.10082
ENSG00000008517	interleukin 32 [Source:HGNC Symbol;Acc:16830]	16	3115298	3131908	IL32	protein_coding	1.67724	0	0	0	2.50432	0	0.832067	0.471023	0	0	0.78308	0.497358	0	2.52327	0.259713	0	0	0	7.67611	0	0.741889	1.12062	0.781936	0	0	0	0	0	0	0.635912	0.873165	0	0	0	2.92452	0	0	0	0	2.28627	0	0	0
ENSG00000143742	signal recognition particle 9kDa [Source:HGNC Symbol;Acc:11304]	1	225965531	225978168	SRP9	protein_coding	8.83114	8.72637	8.69853	9.01698	9.54031	9.36398	8.80253	8.03806	8.45055	7.65648	8.63852	7.51242	7.05752	7.08415	7.12558	9.64771	8.62007	6.70055	7.27088	9.06731	8.78805	8.39641	9.01587	8.31868	8.51488	9.70316	9.30928	9.08392	9.02887	7.45325	8.96785	6.45468	8.30514	9.27751	9.48405	9.62491	8.37353	7.07226	5.86383	8.05779	3.76027	7.97162	7.98549
ENSG00000104133	spastic paraplegia 11 (autosomal recessive) [Source:HGNC Symbol;Acc:11226]	15	44854894	44955876	SPG11	protein_coding	4.02986	3.02302	6.06176	3.65733	2.28734	3.32506	4.59266	7.03955	2.27745	5.23958	1.17432	2.33425	5.69287	5.08058	0.90573	6.50638	3.88871	7.34965	8.96936	2.55222	4.76493	1.40876	6.57511	0.588973	3.15007	3.2	4.34394	5.51903	6.58168	4.53185	6.35109	5.1422	4.22514	3.99836	8.66169	4.92835	1.12162	5.15933	4.12666	3.61673	3.37658	8.59001	4.99277
ENSG00000183010	pyrroline-5-carboxylate reductase 1 [Source:HGNC Symbol;Acc:9721]	17	79890260	79900288	PYCR1	protein_coding	0	0	5.05712	7.032	4.94582	0	3.32143	2.90486	0	1.59603	0	5.02488	0	0	0	0	1.00009	0	0	0	5.60697	0	0	0.435769	0	0	0	0	0	0.685898	0	0	0	0	0	7.49418	0	0	2.75162	1.72114	0	4.13605	0
ENSG00000170890	phospholipase A2, group IB (pancreas) [Source:HGNC Symbol;Acc:9030]	12	120759914	120765592	PLA2G1B	protein_coding	0	0	0	0	0	0	0	0	0	0	0	0	0	0	0	0	0	0	0	0	0	0	0	0	0	0	0	0	0	0	0	0	0	0	0	0	0	0	0	0	0	0	0
ENSG00000083857	FAT atypical cadherin 1 [Source:HGNC Symbol;Acc:3595]	4	187508937	187647876	FAT1	protein_coding	3.94954	0	0	0	0	0	0	0	0	0	7.23798	0	0	0	0	0	3.67425	0	3.77488	0	0	7.59042	0	0	0	5.69772	0	0	7.80806	2.21792	0	1.97123	0	3.79905	7.79531	0	0	0	2.18037	0	0	0	0
ENSG00000131626	protein tyrosine phosphatase, receptor type, f polypeptide (PTPRF), interacting protein (liprin), alpha 1 [Source:HGNC Symbol;Acc:9245]	11	70116806	70230509	PPFIA1	protein_coding	6.68546	6.52211	5.88537	2.25728	6.29592	2.74417	6.81227	2.74032	3.00759	6.55579	2.59675	2.47627	2.97719	5.41269	0.888754	2.35742	3.10252	3.67212	8.21491	1.50778	4.61901	4.2286	5.4604	6.22123	3.1211	3.93472	7.85934	4.6952	6.18007	4.52423	5.83077	3.9145	4.29618	7.82288	6.71722	3.21934	4.45204	10.689	7.11826	6.06841	3.34437	0	2.84964
ENSG00000124535	Werner helicase interacting protein 1 [Source:HGNC Symbol;Acc:20876]	6	2765648	2787186	WRNIP1	protein_coding	5.7427	0	5.80016	0	2.66136	0	0	0	0	6.39099	0	5.36973	0	0	0	0	0	0	0	0	5.60697	0	0	0	5.61153	0	0	5.47507	0	1.14887	1.91543	0.790987	0	0.995536	1.99872	0	6.36532	0	4.68532	0	0	0	0
ENSG00000197956	S100 calcium binding protein A6 [Source:HGNC Symbol;Acc:10496]	1	153507075	153508720	S100A6	protein_coding	8.80478	4.27773	6.81308	5.18507	5.46846	8.19373	6.37511	6.34586	0	5.12798	0.44595	5.341	7.58823	4.91721	6.51044	3.60488	7.08382	8.13492	8.05492	4.80756	5.98936	8.03397	8.90733	5.22608	5.89735	3.24545	3.78031	6.08101	5.51761	5.72082	5.37417	8.83735	1.0958	8.25318	7.06655	0	5.24866	5.85387	3.1134	0	6.3031	4.43675	7.21542
ENSG00000213614	hexosaminidase A (alpha polypeptide) [Source:HGNC Symbol;Acc:4878]	15	72635775	72668817	HEXA	protein_coding	6.05923	9.02431	6.15117	7.17625	3.96784	7.1603	8.81133	8.57013	6.16089	8.1203	2.97923	7.53304	8.37656	6.64795	6.39173	7.47174	5.96453	2.11916	7.28912	5.27472	9.35729	0	0.635955	9.4221	7.13848	1.7059	9.87935	8.02107	9.8017	8.70613	6.55685	8.18081	5.0124	8.87677	7.03076	6.78846	4.13339	7.22914	1.07109	8.57928	5.95762	7.75375	8.63516
ENSG00000132549	vacuolar protein sorting 13 homolog B (yeast) [Source:HGNC Symbol;Acc:2183]	8	100025494	100889808	VPS13B	protein_coding	4.5798	5.43689	2.58777	3.88374	5.50994	5.12254	5.569	4.00518	4.78479	4.93863	3.07597	5.53355	4.58207	10.0464	3.37179	2.82825	3.81357	5.99756	5.794	2.30417	5.73779	7.6862	5.28223	6.95624	3.81126	6.83392	5.88836	3.0934	5.65103	3.66183	5.53979	8.86547	5.5421	4.8113	5.3349	4.67042	3.9254	5.53659	3.65726	4.9426	5.23722	6.12659	5.22637
ENSG00000169925	bromodomain containing 3 [Source:HGNC Symbol;Acc:1104]	9	136895427	136933657	BRD3	protein_coding	1.21017	0	4.2493	5.50325	2.50093	0	6.13475	0	8.54301	6.4333	7.23798	0	0	6.72307	0	8.33233	7.83592	0	0	0	0	0	2.20075	0	6.61536	0	1.41282	9.00057	5.76291	2.82518	0	4.69091	0	0.995536	8.70979	1.8663	0	1.81803	0	0	4.58076	1.35008	0
ENSG00000122741	DDB1 and CUL4 associated factor 10 [Source:HGNC Symbol;Acc:23686]	9	37800499	37867663	DCAF10	protein_coding	7.16495	2.35183	3.4316	1.6861	7.64916	9.32961	4.18057	7.0868	7.24048	4.68493	4.2563	4.6521	7.5469	8.67908	3.27619	2.75393	2.51094	4.94167	3.83307	1.58817	4.3005	7.36757	4.45331	1.63283	5.31351	7.33241	6.60392	2.09902	4.06647	4.55033	8.20822	2.27753	7.89918	3.11724	8.17196	2.59658	4.61347	3.73627	4.47606	4.16356	5.77354	4.56787	2.46759
ENSG00000137731	FXYD domain containing ion transport regulator 2 [Source:HGNC Symbol;Acc:4026]	11	117671559	117699413	FXYD2	protein_coding	10.2032	7.62611	9.65004	8.39271	3.69868	4.97932	4.2714	5.73896	6.97897	5.97217	8.70703	4.12572	7.01556	9.75785	3.00121	9.79018	5.67242	6.87532	0	7.35838	7.40738	0	5.79901	7.59503	7.08992	5.30229	6.10532	4.82742	11.9951	8.78569	7.18906	8.26542	5.97795	9.86424	8.6615	8.35773	0	10.6372	10.3597	5.69224	10.4013	7.10816	4.98641
ENSG00000253729	protein kinase, DNA-activated, catalytic polypeptide [Source:HGNC Symbol;Acc:9413]	8	48685669	48872743	PRKDC	protein_coding	3.22029	2.4852	6.21736	0	3.05722	7.58849	3.60243	5.23493	2.61611	7.05395	3.22201	4.71524	3.92058	3.89169	8.22727	7.76959	9.11036	0	6.96977	0	6.53047	7.72687	3.26802	2.16902	2.2573	9.84559	5.51064	7.88084	1.27207	4.43652	6.51374	0	6.92547	9.53313	7.63488	5.70961	0	0.418783	0	6.0258	0	0.595747	8.71109
ENSG00000021355	serpin peptidase inhibitor, clade B (ovalbumin), member 1 [Source:HGNC Symbol;Acc:3311]	6	2832566	2842240	SERPINB1	protein_coding	1.07276	6.75341	7.73267	0	5.38725	4.23921	4.63903	0.591669	0	3.44305	8.22797	0.944963	0.241032	7.16919	5.02953	0.83615	7.36804	0.61834	2.55144	9.4231	3.75049	0	5.13994	4.19211	6.16588	5.32812	5.70427	3.32919	7.24387	2.33394	5.4819	3.72355	3.85174	3.36835	7.16019	2.91168	0.521576	2.1708	5.686	6.07137	1.35572	7.14168	1.0527
ENSG00000070778	protein tyrosine phosphatase, non-receptor type 21 [Source:HGNC Symbol;Acc:9651]	14	88932122	89021077	PTPN21	protein_coding	0	0	0	0	0	0	0	0	0	2.6993	0	0	0	0	0	0	0	7.17802	0	0	0.741889	0	0	0	2.43592	0	0	0	0	7.72942	2.44244	0	0	0	0	0	0	0	0	0	2.48183	7.94427	2.82227
ENSG00000162231	nuclear RNA export factor 1 [Source:HGNC Symbol;Acc:8071]	11	62559595	62573774	NXF1	protein_coding	4.8808	3.97902	1.22322	0	1.26991	2.32212	0.907485	0	0	6.74686	6.42827	0	0	3.60347	5.01382	1.81768	1.35743	7.10971	6.1885	0.551476	7.68455	4.18767	1.13846	0	6.65198	1.69586	5.23883	0.619278	3.17293	4.02057	1.96134	2.79886	5.16791	1.60281	1.99872	0.61277	0	0	6.30779	0.653344	7.58801	0	0.562157
ENSG00000137726	FXYD domain containing ion transport regulator 6 [Source:HGNC Symbol;Acc:4030]	11	117707693	117748201	FXYD6	protein_coding	8.65522	9.74989	9.8558	9.34894	5.68164	9.32964	8.68865	8.22823	9.12162	7.46423	1.06118	5.49782	8.46994	0	8.15311	0.782777	8.35032	8.96647	6.09808	9.41594	7.94024	5.40986	4.74952	8.96625	9.03446	0	6.38455	9.89938	4.15814	3.67495	7.50846	0	8.97028	0.581988	0	7.68716	8.11573	3.10064	0	7.75427	0	5.66363	6.80223
ENSG00000135164	cyclin D binding myb-like transcription factor 1 [Source:HGNC Symbol;Acc:14603]	7	86781677	86825653	DMTF1	protein_coding	0.523944	7.85506	6.02379	1.06199	6.80976	0.496798	5.35077	0	0	0.781845	9.46028	7.79901	4.17694	0	0	0	2.47916	1.71483	5.6061	0.551476	7.03085	5.05432	5.18	1.45869	1.53131	9.26495	0	9.71748	0.557475	4.39245	5.25354	10.1523	0	1.80097	4.60717	1.04151	7.12408	0	2.3549	8.995	5.80819	0	4.76338
ENSG00000001626	cystic fibrosis transmembrane conductance regulator (ATP-binding cassette sub-family C, member 7) [Source:HGNC Symbol;Acc:1884]	7	117105838	117356025	CFTR	protein_coding	0	0	0	0	0	0	0	0	0	0	0	0	0	0	0	0	0	0	0	0	0	0	0	0	0	0	0	0	0	0	0	0	0	0	0	0	0	0	0	0	0	0	0
ENSG00000085733	cortactin [Source:HGNC Symbol;Acc:3338]	11	70244510	70282690	CTTN	protein_coding	10.1919	7.00057	9.4765	7.59799	7.73732	8.78608	9.52015	8.6605	9.17657	8.56471	8.42023	9.51116	8.36113	10.0363	9.5667	9.93357	9.9009	8.33868	11.2145	4.75877	8.33867	9.43346	10.5566	8.1673	8.7423	8.28572	2.88166	8.98382	7.3552	4.31251	8.55811	2.42802	9.62209	7.9511	7.83372	10.1007	10.022	7.69843	7.70626	7.20033	8.11734	8.43234	7.41421
ENSG00000166710	beta-2-microglobulin [Source:HGNC Symbol;Acc:914]	15	45003675	45011075	B2M	protein_coding	12.3511	12.3386	12.0591	12.3248	12.4382	12.5188	12.5212	11.8518	11.5238	12.3147	10.1568	12.7817	12.5382	10.1296	12.1305	11.5115	12.8933	11.633	12.6709	12.3869	12.4022	13.1659	11.5405	12.5903	12.8889	11.6367	12.0213	12.9793	10.9431	11.4864	12.5941	11.1261	11.588	12.5948	10.9602	11.8113	12.2771	9.88399	11.4543	11.8032	10.2876	12.1644	12.1909
ENSG00000205302	sorting nexin 2 [Source:HGNC Symbol;Acc:11173]	5	122110691	122165803	SNX2	protein_coding	5.33662	7.35992	6.64047	1.03992	0	4.87094	7.43438	7.67924	6.82051	4.24665	3.81143	7.31775	0	0.614652	1.93271	8.12645	8.16646	5.76847	7.34788	7.29862	0.741889	8.65082	0	2.64288	6.70523	6.74589	2.60786	8.64355	7.60633	7.72527	7.61185	0	6.00272	0	5.0858	6.82932	7.70559	4.73774	9.4952	8.70144	7.9401	0	4.73835
ENSG00000104714	glutamate-rich 1 [Source:HGNC Symbol;Acc:27234]	8	564746	688106	ERICH1	protein_coding	2.30478	0	7.71339	0	2.66136	1.07115	2.0651	0.475076	0.51357	0	0	3.31703	2.33367	0.614652	0	0	0	5.30235	7.25026	0	0	0	0	0	4.22067	0	0	0	2.10495	0	6.92262	0	0	3.07958	1.48433	0.61277	4.23698	5.20104	6.10245	0	0	0.600669	3.90823
ENSG00000009413	REV3-like, polymerase (DNA directed), zeta, catalytic subunit [Source:HGNC Symbol;Acc:9968]	6	111620234	111804918	REV3L	protein_coding	8.78943	9.29457	9.06852	5.78867	5.44197	9.24369	7.98811	8.85209	7.98327	8.90618	6.09264	7.47962	7.00997	7.61931	8.27302	5.95117	6.94108	8.40729	7.8378	7.28929	7.65323	7.02417	8.15368	6.44764	6.6041	7.71908	7.11264	6.04633	7.63194	8.24608	7.53932	9.79472	7.37005	6.3489	8.30891	7.73539	8.59864	7.40249	9.86691	7.68724	9.66076	6.25574	6.20651
ENSG00000250312	zinc finger protein 718 [Source:HGNC Symbol;Acc:26889]	4	124386	157779	ZNF718	lincRNA	3.12864	1.94971	0.805223	8.25618	0	0.511731	0	0.553842	0	0	1.75071	0	0	0.71143	0	0.44384	2.29926	0	1.89151	0	0	0	0.869754	0.481656	0.781049	1.2441	2.98394	2.15205	3.69937	2.63754	0	0.873808	3.67418	3.29063	0	0	0	0	0	0	1.49525	7.14373	1.87473
ENSG00000143799	poly (ADP-ribose) polymerase 1 [Source:HGNC Symbol;Acc:270]	1	226548392	226595780	PARP1	protein_coding	4.34104	6.08082	1.22322	8.34999	0	0	6.25993	1.56069	0	6.40806	6.71362	3.85291	0	0	9.42013	0.44384	0	0	0	0	8.78374	0	10.0242	9.35913	7.39225	5.61689	7.97715	8.57014	0	2.82518	4.49976	5.05012	6.58445	0	0	1.64005	0	7.59856	8.19203	0	6.6491	0	4.33288
ENSG00000187806	transmembrane protein 202 [Source:HGNC Symbol;Acc:33733]	15	72690614	72700370	TMEM202	protein_coding	0	0	0	0	0	0	0	0	0	0	0	0	0	0	0	0	0	0	0	0	0	0	0	0	0	0	0	0	0	0	0	0	0	0	0	0	0	0	0	0	0	0	0
ENSG00000006194	zinc finger protein 263 [Source:HGNC Symbol;Acc:13056]	16	3313743	3351401	ZNF263	protein_coding	0	2.12536	0.84864	1.03249	0.712953	0	1.82364	6.74446	0.456274	8.2539	0	0.237958	0	0.634534	0.72898	0	0	1.02035	1.10234	0	1.6437	6.6043	0	0	0	2.05909	0.834718	2.03953	1.51999	0	2.45854	6.99933	4.98675	0.705824	0	0.617754	0	0	1.2779	1.03842	3.88344	0.600669	0
ENSG00000125810	CD93 molecule [Source:HGNC Symbol;Acc:15855]	20	23059986	23066977	CD93	protein_coding	0	0	0	0	0	0	0	0	0	0	0	0	0	0	0	0	0	0	0	0	0	0	0	0	0	0	0	0	0	0	0	0	0	0	0	0	0	0	0	0	0	0	0
ENSG00000057704	transmembrane and coiled-coil domain family 3 [Source:HGNC Symbol;Acc:29199]	12	94960900	95044338	TMCC3	protein_coding	0	0	0	0	0	0	5.56001	5.07721	2.97109	0	6.96016	0	4.29931	0	1.17141	0	0	0	0	5.42299	0.741889	0	6.85038	8.53233	1.53131	3.92024	0	0	2.10495	5.02913	7.64819	1.67391	1.71133	0	2.37713	0.61277	0	0	0	0	1.33838	4.04374	0
ENSG00000196632	WNK lysine deficient protein kinase 3 [Source:HGNC Symbol;Acc:14543]	X	54219256	54385075	WNK3	protein_coding	8.40468	5.44529	10.1228	0	5.30266	0.718947	5.90639	6.17191	1.41089	7.89199	0	1.94898	7.95758	3.98998	6.13436	6.34576	4.18469	2.97381	2.84332	7.81451	1.59316	1.76002	6.34422	6.65377	7.98909	4.25582	2.70267	0	0	1.50811	0.641542	4.56304	6.85592	5.92513	1.49664	0	6.18716	1.08397	8.58442	0.663815	2.5587	2.10258	7.5301
ENSG00000176840	MIR7-3 host gene (non-protein coding) [Source:HGNC Symbol;Acc:30049]	19	4769117	4772545	MIR7-3HG	lincRNA	9.55284	6.49359	6.19125	7.45335	8.0767	8.20992	8.05593	8.04146	3.74414	4.69915	5.02292	8.12807	8.35446	8.21259	5.82599	7.7063	5.56715	6.431	0	6.5025	8.04014	0	6.7575	7.87663	7.44015	4.12116	8.28768	7.68986	9.65573	8.02596	8.82474	5.89289	5.10589	8.71389	6.52651	7.23105	9.05738	4.25573	8.69667	6.45112	6.06033	0	3.4953
ENSG00000005810	MYC binding protein 2, E3 ubiquitin protein ligase [Source:HGNC Symbol;Acc:23386]	13	77618792	77901185	MYCBP2	protein_coding	8.54211	6.06851	5.13069	8.82846	7.64436	6.39145	8.04053	5.80707	0	4.20818	9.16301	6.94977	5.79575	9.14255	5.41412	5.81028	2.29926	3.09169	5.51712	5.35897	3.85273	6.87666	7.12775	0	5.55541	8.01312	7.60472	0	6.92193	6.82578	0	1.67391	7.37426	5.27669	9.36519	4.96181	6.061	0	2.18037	3.34553	7.80353	2.20631	4.03697
ENSG00000143621	interleukin enhancer binding factor 2 [Source:HGNC Symbol;Acc:6037]	1	153634512	153643524	ILF2	protein_coding	0	9.15081	5.26194	5.89759	3.27131	8.95457	7.93442	4.76179	1.83409	7.28868	9.54666	7.09931	5.29969	9.43257	4.80348	7.3368	8.61193	8.07802	7.7528	1.73462	7.97223	6.64195	6.33731	8.02444	8.28678	8.22429	2.06523	5.93934	8.17123	5.99314	8.13726	0	6.87044	8.65642	8.23479	6.09186	1.45528	11.0501	3.91942	0	5.64148	4.82631	7.5889
ENSG00000140987	zinc finger and SCAN domain containing 32 [Source:HGNC Symbol;Acc:20812]	16	3432085	3451065	ZSCAN32	protein_coding	0	3.08297	0	0	0	0	0	0	0	0	0	6.21644	0	0	7.82422	0	0	0	4.95162	0	2.12493	0	0	0	0	0	0	0	0	4.88797	0	4.98508	5.24651	0	0	0	0	10.5338	0	0	0	0	0
ENSG00000055609	lysine (K)-specific methyltransferase 2C [Source:HGNC Symbol;Acc:13726]	7	151832010	152133090	KMT2C	protein_coding	8.45181	8.74399	7.78642	1.36971	7.2473	6.54904	6.35153	6.81881	8.58475	8.79582	4.70565	6.36878	8.34658	8.25655	0.473235	0.755332	8.17403	8.17866	8.31208	5.74346	7.88833	7.05436	5.22316	3.04096	7.52325	8.96194	6.11171	5.04078	9.22239	8.27108	7.20995	6.48311	9.13234	2.41765	9.18511	5.12012	2.01744	7.35145	6.62295	4.79562	8.31185	10.0986	7.53784
ENSG00000198160	mesoderm induction early response 1, transcriptional regulator [Source:HGNC Symbol;Acc:29657]	1	67390578	67454302	MIER1	protein_coding	9.11727	7.64322	6.02379	6.93609	5.28355	6.83348	7.95308	2.04262	6.15224	6.84416	7.15608	6.38068	1.00735	8.33494	5.58382	9.80294	8.80351	4.21399	7.56062	8.11664	8.23624	7.18195	5.44118	7.40221	6.96013	8.73194	7.53706	0.883044	8.88475	8.05081	7.66406	0	8.17647	6.2673	7.56359	6.77458	8.43071	8.32435	6.2769	7.22815	8.40445	0	7.63709
ENSG00000124570	serpin peptidase inhibitor, clade B (ovalbumin), member 6 [Source:HGNC Symbol;Acc:8950]	6	2948393	2972090	SERPINB6	protein_coding	3.34986	7.70415	0	7.33566	1.58369	8.55078	6.93092	6.64469	8.02773	5.24662	0	5.23571	6.80894	4.96706	8.48975	0	6.89864	0	5.17072	3.85817	6.70797	9.393	6.67864	6.57186	5.18145	6.65165	6.29855	0	8.33823	6.58433	5.68524	0	0.64953	4.48331	9.58738	2.06183	1.45528	9.25609	5.98666	0	4.98065	9.30511	5.24426
ENSG00000100201	DEAD (Asp-Glu-Ala-Asp) box helicase 17 [Source:HGNC Symbol;Acc:2740]	22	38879445	38903665	DDX17	protein_coding	8.54211	8.8211	8.89929	8.03557	7.72376	7.98177	8.1996	7.03196	6.94087	7.08613	1.82191	8.75823	6.06972	8.3086	5.57437	7.4834	7.59868	1.81078	9.01589	6.52755	8.54232	7.29666	5.34231	7.26953	7.29718	9.52738	9.08334	8.46548	8.10603	8.66458	7.42434	7.22151	8.07364	9.04771	9.22952	8.5735	5.34456	6.27839	8.4663	6.17049	10.143	9.48846	4.66055
ENSG00000163050	aarF domain containing kinase 3 [Source:HGNC Symbol;Acc:16812]	1	227085237	227175246	ADCK3	protein_coding	7.35956	0	1.21079	1.95332	0.736204	1.07366	5.4176	2.95143	2.54496	1.67715	0.38723	0.684595	0	1.10969	0.0400889	1.75131	2.11344	2.28179	0.81248	1.01741	2.42321	2.19638	9.28011	0.381935	2.58124	2.64483	2.31281	0.468989	1.54119	2.16407	2.11696	2.46665	2.3064	1.43	0	7.59013	0	0.645369	0.667922	2.03725	4.46769	3.30033	4.00795
ENSG00000158604	transmembrane emp24 protein transport domain containing 4 [Source:HGNC Symbol;Acc:22301]	7	44617493	44621886	TMED4	protein_coding	9.87978	9.2755	8.93944	9.43122	9.26749	9.24753	10.057	8.77308	8.22202	8.24	9.61547	9.10678	7.29162	8.7539	9.0815	10.1786	9.89094	8.68047	9.06734	7.05319	9.75235	7.67991	9.43521	8.87521	9.15211	9.98853	10.7079	9.0939	8.06467	7.9632	9.63872	8.04441	9.86916	8.21752	10.0685	9.65756	6.91818	7.82369	9.21529	7.86188	7.28109	8.88572	7.82449
ENSG00000164111	annexin A5 [Source:HGNC Symbol;Acc:543]	4	122589110	122618268	ANXA5	protein_coding	8.4016	6.8215	6.34128	9.30626	6.82678	8.4769	8.53301	6.00402	5.56006	5.5986	9.04839	8.91384	8.77285	7.40418	7.64245	7.9401	8.09583	6.75518	8.7237	5.954	6.2537	10.5155	0	6.49003	7.95799	9.23412	7.59049	6.64675	8.65927	8.07707	5.66961	7.06509	8.63428	8.4423	9.56701	10.1593	8.33667	9.97129	2.51356	3.70366	6.24613	7.71172	7.91632
ENSG00000168237	glycerate kinase [Source:HGNC Symbol;Acc:24247]	3	52321105	52329272	GLYCTK	protein_coding	0	0	0	0	0	0	0	0	0	0	0	0	0	0	0	0	3.7463	0	0	0	3.0697	0	0	0	0	0	0	0	0	0	0	0	0	0	0	0	0	0	0	0	0	0	0
ENSG00000183283	DAZ associated protein 2 [Source:HGNC Symbol;Acc:2684]	12	51632076	51665146	DAZAP2	protein_coding	7.35764	8.58871	8.80557	7.4226	0.640863	9.80017	7.13878	7.34844	2.92553	6.03814	8.28494	2.89596	1.12227	7.4132	2.53982	7.22571	8.54495	4.56479	8.31746	8.85153	8.7498	8.37274	6.69947	7.50737	6.73361	9.07243	8.62923	7.03834	6.29156	5.84823	7.55722	7.77226	8.32853	7.2579	6.10051	0.572266	7.56335	7.55723	2.93829	4.8895	7.73759	0	0.492012
ENSG00000181163	nucleophosmin (nucleolar phosphoprotein B23, numatrin) [Source:HGNC Symbol;Acc:7910]	5	170814120	170838141	NPM1	protein_coding	9.72456	8.54951	9.22464	8.42727	8.33647	10.5045	8.61146	9.04355	7.40631	8.91297	8.96715	9.21527	8.75609	8.07565	8.45482	9.1561	8.66633	7.35054	10.5167	8.76151	7.35502	9.15915	8.54839	9.98959	9.1549	8.97669	8.93352	7.25317	10.8931	9.96849	9.80518	0	8.25411	9.61221	10.2029	8.16904	8.95348	9.52863	9.3387	7.42853	7.33549	9.58828	7.95532
[truncated: 845 more rows]
[truncated: 337 more columns]

## Sheet: T2D.genes.selected
	Description	Chromosome.Name	Gene.Start..bp.	Gene.End..bp.	Associated.Gene.Name	Gene.Biotype	4th-C63_S30	4th-C66_S36	4th-C7_S15	4th-C18_S31	4th-C5_S8	4th-C57_S18	4th-C67_S40	4th-C56_S17	4th-C45_S87	4th-C68_S41	4th-C94_S96	4th-C4_S9	4th-C73_S54	4th-C27_S51	4th-C24_S43	4th-C40_S79	4th-C93_S88	4th-C83_S71	4th-C36_S69	4th-C85_S78	4th-C50_S5	4th-C22_S45	4th-C89_S83	4th-C81_S64	4th-C86_S77	4th-C12_S19	4th-C92_S89	4th-C88_S84	4th-C3_S1	4th-C23_S44	4th-C9_S13	4th-C78_S58	4th-C29_S56	4th-C62_S29	4th-C28_S55	4th-C43_S85	4th-C69_S42	4th-C51_S6	4th-C79_S66	4th-C37_S73	4th-C8_S14	4th-C35_S68	4th-61_S28
[truncated: 1,908 more rows]
[truncated: 215 more columns]

[truncated: 1 more sheets: NonT2D.and.T2D.genes.selected]
