# Supplementary material for: Single-cell transcriptomes identify human islet cell signatures and reveal cell-type–specific expression changes in type 2 diabetes
Source: Genome Res. 2017 Feb;27(2):208–22. doi: 10.1101/gr.212720.116 (PMC5287227; doi:10.1101/gr.212720.116)
Supplement: Supplemental Material [file supp_gr.212720.116_Supplemental_Table_S5.xlsx]

## Sheet: Sheet1
Suppplemental_Table_S5: Computational assignment of cell cycle phases shows islet single cell samples are not actively undergoing mitosis.
Table showing the numbers of pancreatic cells and their estimated cell cycle classification (G1, G2/M, or S phase) after computational assignment with the scran Bioconductor package. Specifically, we implemented the function “cyclone” to computationally assign single cell samples into cell cycle phases (G1, G2/M, or S phase) based on their expression of human cell cycle markers. Overall, islet ce…
	G1 phase	G2/M phase	S phase
Acinar	1	2	21
Alpha	2	2	235
Beta	9	7	248
Delta	0	1	24
Ductal	1	0	26
Epsilon	0	0	1
None/Other	0	1	20
PP/Gamma	1	0	17
Stellate	0	0	19
