# Supplementary material for: Single-cell transcriptomes identify human islet cell signatures and reveal cell-type–specific expression changes in type 2 diabetes
Source: Genome Res. 2017 Feb;27(2):208–22. doi: 10.1101/gr.212720.116 (PMC5287227; doi:10.1101/gr.212720.116)
Supplement: Supplemental Material [file supp_gr.212720.116_Supplemental_Table_S6.xlsx]

## Sheet: NonT2D.Acinar.vs.Ductal
Supplemental_Table_S6: Supervised differential gene expression analysis of pancreatic single cell types identifies genes enriched in specific cell types.
Table containing results from the various differential gene expression analyses conducted. Each sheet name explains the type of differential analysis performed. Types of analyses included cell type comparisons (e.g. NonT2D.Acinar.vs.Ductal signifies a comparison between non-diabetic acinar and ductal cells), cell type and aggregate endocrine or exocrine cell comparisons (e.g. NonT2D.Beta.vs.Endoc…
	Description	Associated.Gene.Name	Gene.Biotype	logFC	logCPM	Acinar Male avelogCPM	Ductal Male avelogCPM	Acinar Female avelogCPM	Ductal Female avelogCPM	Acinar avelogCPM	Ductal avelogCPM	LR	PValue	FDR
ENSG00000091704	carboxypeptidase A1 (pancreatic) [Source:HGNC Symbol;Acc:2296]	CPA1	protein_coding	16.3115	14.2594	6.79368	0.353986	14.72	0.865351	14.6209	0.609287	170.284	6.41e-39	4.3e-35
ENSG00000158516	carboxypeptidase A2 (pancreatic) [Source:HGNC Symbol;Acc:2297]	CPA2	protein_coding	15.5255	12.2294	5.0036	0.353986	12.687	0.64477	12.5882	0.492064	151.609	7.71e-35	2.59e-31
ENSG00000204983	protease, serine, 1 (trypsin 1) [Source:HGNC Symbol;Acc:9475]	PRSS1	protein_coding	14.8962	15.6017	9.22599	0.460333	16.0793	2.32562	15.9807	1.63835	149.458	2.28e-34	5.09e-31
ENSG00000175535	pancreatic lipase [Source:HGNC Symbol;Acc:9155]	PNLIP	protein_coding	13.6921	13.0225	9.6901	0.460333	13.4491	1.50736	13.3573	1.03719	145.68	1.52e-33	2.56e-30
ENSG00000172023	regenerating islet-derived 1 beta [Source:HGNC Symbol;Acc:9952]	REG1B	protein_coding	15.0031	13.4511	11.9004	0.353986	13.8321	1.08495	13.7594	0.731282	118.696	1.22e-27	1.64e-24
ENSG00000171345	keratin 19 [Source:HGNC Symbol;Acc:6436]	KRT19	protein_coding	-12.3772	8.24647	1.41864	9.08321	0.00257762	10.0459	0.059943	9.64279	112.442	2.86e-26	3.19e-23
ENSG00000142789	chymotrypsin-like elastase family, member 3A [Source:HGNC Symbol;Acc:15944]	CELA3A	protein_coding	15.2398	14.1807	9.62089	1.0376	14.6092	1.15836	14.513	1.09327	110.569	7.35e-26	7.04e-23
ENSG00000170890	phospholipase A2, group IB (pancreas) [Source:HGNC Symbol;Acc:9030]	PLA2G1B	protein_coding	15.2439	12.0228	2.0036	0.353986	12.4453	0.64477	12.3462	0.492064	109.77	1.1e-25	9.22e-23
ENSG00000153002	carboxypeptidase B1 (tissue) [Source:HGNC Symbol;Acc:2299]	CPB1	protein_coding	15.7884	14.249	7.11908	0.964989	14.7327	0.974253	14.6338	0.966625	109.427	1.31e-25	9.75e-23
ENSG00000170835	carboxyl ester lipase [Source:HGNC Symbol;Acc:1848]	CEL	protein_coding	13.1483	8.61862	9.63235	0.353986	9.03198	0.64477	9.07923	0.492064	104.275	1.76e-24	1.18e-21
ENSG00000169347	glycoprotein 2 (zymogen granule membrane) [Source:HGNC Symbol;Acc:4441]	GP2	protein_coding	10.8173	10.9479	8.24041	0.804021	11.3862	1.98965	11.2988	1.47284	74.2386	6.92e-18	4.22e-15
ENSG00000215704	chymotrypsin-like elastase family, member 2B [Source:HGNC Symbol;Acc:29995]	CELA2B	protein_coding	12.7113	9.3048	2.67565	0.353986	9.77152	0.64477	9.67453	0.492064	72.1093	2.04e-17	1.14e-14
ENSG00000137731	FXYD domain containing ion transport regulator 2 [Source:HGNC Symbol;Acc:4026]	FXYD2	protein_coding	-10.5077	6.39688	1.41864	8.35382	-0.0444316	7.9358	0.0160659	8.16036	67.2799	2.36e-16	1.21e-13
ENSG00000187021	pancreatic lipase-related protein 1 [Source:HGNC Symbol;Acc:9156]	PNLIPRP1	protein_coding	13.3026	9.69286	8.25784	0.929343	10.0985	0.64477	10.0285	0.800899	65.6773	5.31e-16	2.54e-13
ENSG00000137392	colipase, pancreatic [Source:HGNC Symbol;Acc:2085]	CLPS	protein_coding	14.6137	11.1413	1.41864	0.353986	11.5921	0.64477	11.4932	0.492064	64.5706	9.31e-16	4.16e-13
ENSG00000060982	branched chain amino-acid transaminase 1, cytosolic [Source:HGNC Symbol;Acc:976]	BCAT1	protein_coding	8.19549	8.8167	7.88649	0.462151	9.30487	2.47613	9.2449	1.71691	62.0682	3.32e-15	1.39e-12
ENSG00000142615	chymotrypsin-like elastase family, member 2A [Source:HGNC Symbol;Acc:24609]	CELA2A	protein_coding	12.8219	11.9052	3.20733	0.555336	12.3197	1.18753	12.2207	0.87702	57.9354	2.71e-14	1.07e-11
ENSG00000143954	regenerating islet-derived 3 gamma [Source:HGNC Symbol;Acc:29595]	REG3G	protein_coding	12.5257	9.08483	1.41864	0.353986	9.62714	0.64477	9.52997	0.492064	57.1211	4.1e-14	1.53e-11
ENSG00000243480	amylase, alpha 2A (pancreatic) [Source:HGNC Symbol;Acc:477]	AMY2A	protein_coding	13.6315	11.0238	1.41864	0.353986	11.44	0.759341	11.3412	0.551842	56.332	6.12e-14	2.16e-11
ENSG00000179751	syncollin [Source:HGNC Symbol;Acc:18442]	SYCN	protein_coding	12.683	9.19825	1.41864	0.353986	9.63221	0.64477	9.535	0.492064	54.279	1.74e-13	5.83e-11
ENSG00000001626	cystic fibrosis transmembrane conductance regulator (ATP-binding cassette sub-family C, member 7) [Source:HGNC Symbol;Acc:1884]	CFTR	protein_coding	-11.9816	9.08459	1.41864	11.6109	-0.0399955	9.25251	0.0203688	10.8721	53.2349	2.96e-13	9.45e-11
ENSG00000168925	chymotrypsinogen B1 [Source:HGNC Symbol;Acc:2521]	CTRB1	protein_coding	15.3899	12.9993	8.30299	3.57664	13.5029	0.857942	13.4063	2.71693	50.4604	1.22e-12	3.7e-10
ENSG00000137673	matrix metallopeptidase 7 (matrilysin, uterine) [Source:HGNC Symbol;Acc:7174]	MMP7	protein_coding	-13.6181	10.4971	1.41864	12.6195	-0.0429601	10.7507	0.01749	11.9693	50.1989	1.39e-12	4.05e-10
ENSG00000166396	serpin peptidase inhibitor, clade B (ovalbumin), member 7 [Source:HGNC Symbol;Acc:13902]	SERPINB7	protein_coding	-13.0725	7.32993	1.41864	0.353986	-0.0931393	9.5186	-0.0292957	8.52766	49.1386	2.39e-12	6.66e-10
ENSG00000153292	G protein-coupled receptor 110 [Source:HGNC Symbol;Acc:18990]	GPR110	protein_coding	-6.81536	6.88698	2.55614	7.34085	1.6974	8.93071	1.72773	8.34474	44.5994	2.42e-11	6.48e-09
ENSG00000108679	lectin, galactoside-binding, soluble, 3 binding protein [Source:HGNC Symbol;Acc:6564]	LGALS3BP	protein_coding	-9.28341	6.90623	1.41864	8.98307	0.1506	8.13636	0.19902	8.62343	43.0897	5.23e-11	1.35e-08
ENSG00000019582	CD74 molecule, major histocompatibility complex, class II invariant chain [Source:HGNC Symbol;Acc:1697]	CD74	protein_coding	-8.79652	6.13327	1.41864	8.31432	0.0513732	6.77758	0.10575	7.7429	42.719	6.32e-11	1.57e-08
ENSG00000167748	kallikrein 1 [Source:HGNC Symbol;Acc:6357]	KLK1	protein_coding	12.7241	9.07078	1.41864	0.353986	9.4707	0.64477	9.37383	0.492064	41.5506	1.15e-10	2.75e-08
ENSG00000158525	carboxypeptidase A5 [Source:HGNC Symbol;Acc:15722]	CPA5	protein_coding	7.44688	3.88825	2.0036	0.353986	4.34248	0.64477	4.289	0.492064	41.2977	1.31e-10	3.02e-08
ENSG00000114204	serpin peptidase inhibitor, clade I (pancpin), member 2 [Source:HGNC Symbol;Acc:8945]	SERPINI2	protein_coding	11.4583	7.42293	5.70404	0.353986	7.89222	0.64477	7.81976	0.492064	41.1749	1.39e-10	3.11e-08
ENSG00000162438	chymotrypsin C (caldecrin) [Source:HGNC Symbol;Acc:2523]	CTRC	protein_coding	7.28725	10.6985	6.80838	5.00289	11.1393	4.46915	11.0456	4.75877	40.354	2.12e-10	4.58e-08
ENSG00000168928	chymotrypsinogen B2 [Source:HGNC Symbol;Acc:2522]	CTRB2	protein_coding	17.2976	13.4939	8.0239	5.15973	13.9343	0.64477	13.8365	4.11479	38.688	4.97e-10	1.04e-07
ENSG00000213722	dimethylarginine dimethylaminohydrolase 2 [Source:HGNC Symbol;Acc:2716]	DDAH2	protein_coding	-9.31571	3.92521	1.41864	4.43559	-0.0931393	6.45276	-0.0292957	5.7718	38.4665	5.57e-10	1.13e-07
ENSG00000006611	Usher syndrome 1C (autosomal recessive, severe) [Source:HGNC Symbol;Acc:12597]	USH1C	protein_coding	-10.3135	4.75937	1.41864	4.37263	-0.0931393	7.34858	-0.0292957	6.53324	37.6218	8.59e-10	1.69e-07
ENSG00000007062	prominin 1 [Source:HGNC Symbol;Acc:9454]	PROM1	protein_coding	-10.8451	5.45448	1.41864	6.13797	-0.0931393	7.58028	-0.0292957	7.04735	35.5436	2.49e-09	4.66e-07
ENSG00000163898	lipase, member H [Source:HGNC Symbol;Acc:18483]	LIPH	protein_coding	-4.32466	6.19515	5.07055	7.57738	2.51432	7.80297	2.73461	7.69477	35.5375	2.5e-09	4.66e-07
ENSG00000110092	cyclin D1 [Source:HGNC Symbol;Acc:1582]	CCND1	protein_coding	-8.84478	4.03061	1.41864	5.63262	-0.0931393	5.54872	-0.0292957	5.59196	34.8723	3.52e-09	6.38e-07
ENSG00000135744	angiotensinogen (serpin peptidase inhibitor, clade A, member 8) [Source:HGNC Symbol;Acc:333]	AGT	protein_coding	-10.8733	5.26643	1.41864	4.21325	-0.0931393	8.15905	-0.0292957	7.23647	33.8761	5.87e-09	1.04e-06
ENSG00000165125	transient receptor potential cation channel, subfamily V, member 6 [Source:HGNC Symbol;Acc:14006]	TRPV6	protein_coding	-9.1856	4.39205	1.41864	6.2085	-0.0931393	5.68425	-0.0292957	5.96565	33.1744	8.43e-09	1.45e-06
ENSG00000141934	phosphatidic acid phosphatase type 2C [Source:HGNC Symbol;Acc:9230]	PPAP2C	protein_coding	-9.54447	4.5454	1.41864	5.48529	-0.0931393	6.25542	-0.0292957	5.92112	32.4648	1.21e-08	1.99e-06
ENSG00000111319	sodium channel, non-voltage-gated 1 alpha subunit [Source:HGNC Symbol;Acc:10599]	SCNN1A	protein_coding	-5.79578	5.50236	1.49588	4.41891	1.72122	7.38184	1.71093	6.56409	32.4597	1.22e-08	1.99e-06
ENSG00000010438	protease, serine, 3 [Source:HGNC Symbol;Acc:9486]	PRSS3	protein_coding	9.37215	12.6651	1.41864	0.353986	13.1463	4.5343	13.047	3.59118	31.9003	1.62e-08	2.59e-06
ENSG00000163430	follistatin-like 1 [Source:HGNC Symbol;Acc:3972]	FSTL1	protein_coding	-7.70437	5.28378	1.41864	7.6948	-0.0931393	4.21362	-0.0292957	6.83368	31.7675	1.74e-08	2.71e-06
ENSG00000108691	chemokine (C-C motif) ligand 2 [Source:HGNC Symbol;Acc:10618]	CCL2	protein_coding	-10.6506	6.87475	1.41864	9.55776	-0.0931393	7.00176	-0.0292957	8.7755	31.6927	1.81e-08	2.75e-06
ENSG00000163631	albumin [Source:HGNC Symbol;Acc:399]	ALB	protein_coding	11.7306	7.9725	1.41864	0.353986	8.42975	0.64477	8.33543	0.492064	31.2256	2.3e-08	3.42e-06
ENSG00000118785	secreted phosphoprotein 1 [Source:HGNC Symbol;Acc:11255]	SPP1	protein_coding	-13.9872	9.67485	1.41864	11.8179	-0.0931393	10.6556	-0.0292957	11.3505	29.6751	5.11e-08	7.44e-06
ENSG00000105643	arrestin domain containing 2 [Source:HGNC Symbol;Acc:25225]	ARRDC2	protein_coding	-11.3098	5.66252	1.41864	1.90052	-0.0931393	7.85991	-0.0292957	6.84558	27.9594	1.24e-07	1.77e-05
ENSG00000169118	casein kinase 1, gamma 1 [Source:HGNC Symbol;Acc:2454]	CSNK1G1	protein_coding	-5.572	4.7017	1.80269	6.09751	0.594175	5.30664	0.640634	5.77213	26.0942	3.25e-07	4.54e-05
ENSG00000105825	tissue factor pathway inhibitor 2 [Source:HGNC Symbol;Acc:11761]	TFPI2	protein_coding	-7.20869	5.01137	1.41864	7.03131	0.150573	5.97383	0.199149	6.60771	26.0034	3.41e-07	4.6e-05
ENSG00000168916	zinc finger protein 608 [Source:HGNC Symbol;Acc:29238]	ZNF608	protein_coding	-8.0258	4.63876	1.41864	4.04066	0.227039	6.95966	0.270971	6.03443	25.9612	3.48e-07	4.6e-05
ENSG00000113361	cadherin 6, type 2, K-cadherin (fetal kidney) [Source:HGNC Symbol;Acc:1765]	CDH6	protein_coding	-6.29385	4.97603	2.17139	6.99942	0.231874	5.42064	0.332927	6.42345	25.9534	3.5e-07	4.6e-05
ENSG00000100395	l(3)mbt-like 2 (Drosophila) [Source:HGNC Symbol;Acc:18594]	L3MBTL2	protein_coding	-5.58235	6.05856	2.48214	6.50517	2.05611	8.14873	2.06744	7.54344	25.8922	3.61e-07	4.65e-05
ENSG00000237643		RP11-462G2.1	lincRNA	9.56896	5.84102	1.41864	0.353986	6.2558	0.64477	6.17497	0.492064	25.8105	3.77e-07	4.76e-05
ENSG00000115641	four and a half LIM domains 2 [Source:HGNC Symbol;Acc:3703]	FHL2	protein_coding	-4.0664	5.43806	1.99879	5.6603	2.90983	7.34953	2.88146	6.74482	25.5015	4.42e-07	5.49e-05
ENSG00000163235	transforming growth factor, alpha [Source:HGNC Symbol;Acc:11765]	TGFA	protein_coding	-8.4647	4.72489	1.41864	5.66185	0.0608139	6.50668	0.114857	6.14614	24.5897	7.09e-07	8.64e-05
ENSG00000264112		RP11-159D12.2	lincRNA	-7.81751	5.9538	2.31782	7.21438	0.376014	8.04325	0.478162	7.66659	24.4392	7.67e-07	9.18e-05
ENSG00000132793	lipin 3 [Source:HGNC Symbol;Acc:14451]	LPIN3	protein_coding	-6.49442	6.01749	1.41864	1.72243	1.68783	8.32451	1.67638	7.35031	24.3962	7.84e-07	9.22e-05
ENSG00000142611	PR domain containing 16 [Source:HGNC Symbol;Acc:14000]	PRDM16	protein_coding	-7.9532	3.43985	1.41864	5.20614	-0.0931393	4.95969	-0.0292957	5.09452	23.9296	9.99e-07	0.000115479
ENSG00000122574	WAS/WASL interacting protein family, member 3 [Source:HGNC Symbol;Acc:22004]	WIPF3	protein_coding	-9.4665	5.016	1.41864	5.16165	0.0101941	6.92558	0.0672252	6.27679	23.6715	1.14e-06	0.000129816
ENSG00000112303	vanin 2 [Source:HGNC Symbol;Acc:12706]	VNN2	protein_coding	-9.71676	4.48	1.41864	5.65489	-0.0931393	6.25075	-0.0292957	5.98102	23.5627	1.21e-06	0.000135076
ENSG00000007306	carcinoembryonic antigen-related cell adhesion molecule 7 [Source:HGNC Symbol;Acc:1819]	CEACAM7	protein_coding	-12.0133	7.23434	1.41864	8.18284	-0.0429601	9.35577	0.01749	8.8915	23.0348	1.59e-06	0.00017482
ENSG00000101443	WAP four-disulfide core domain 2 [Source:HGNC Symbol;Acc:15939]	WFDC2	protein_coding	-8.75326	3.99243	1.41864	5.56682	-0.0931393	5.60525	-0.0292957	5.58515	22.9768	1.64e-06	0.00017727
ENSG00000149260	calpain 5 [Source:HGNC Symbol;Acc:1482]	CAPN5	protein_coding	-7.92019	4.35023	1.41864	6.08654	-0.0438253	5.44033	0.0166523	5.80555	22.8881	1.72e-06	0.000182691
ENSG00000184254	aldehyde dehydrogenase 1 family, member A3 [Source:HGNC Symbol;Acc:409]	ALDH1A3	protein_coding	-10.2618	6.85417	1.41864	8.5717	0.00581832	8.02396	0.0630799	8.33315	22.7419	1.85e-06	0.000194053
ENSG00000092969	transforming growth factor, beta 2 [Source:HGNC Symbol;Acc:11768]	TGFB2	protein_coding	-8.57129	4.0629	1.41864	5.75644	-0.0931393	5.28339	-0.0292957	5.54832	22.3213	2.31e-06	0.000237839
ENSG00000182973	CCR4-NOT transcription complex, subunit 10 [Source:HGNC Symbol;Acc:23817]	CNOT10	protein_coding	-3.61564	5.04535	3.91944	5.70494	2.32781	6.65024	2.4174	6.2663	22.1561	2.51e-06	0.000255281
ENSG00000106538	retinoic acid receptor responder (tazarotene induced) 2 [Source:HGNC Symbol;Acc:9868]	RARRES2	protein_coding	8.68189	4.94583	1.41864	0.353986	5.38503	0.64477	5.31323	0.492064	22.0896	2.6e-06	0.000260334
ENSG00000163293	NIPA-like domain containing 1 [Source:HGNC Symbol;Acc:27194]	NIPAL1	protein_coding	-5.34595	4.18385	2.15849	2.49188	0.632466	6.62342	0.700584	5.72529	21.6576	3.26e-06	0.000317548
ENSG00000187720	thrombospondin, type I, domain containing 4 [Source:HGNC Symbol;Acc:25835]	THSD4	protein_coding	-7.17001	4.89287	1.41864	5.85613	0.442444	6.99312	0.47551	6.55153	21.6519	3.27e-06	0.000317548
ENSG00000143412	annexin A9 [Source:HGNC Symbol;Acc:547]	ANXA9	protein_coding	-8.47351	4.64156	1.41864	7.05295	-0.0931393	5.25909	-0.0292957	6.42283	21.4461	3.64e-06	0.00034848
ENSG00000166946	cyclin D-type binding-protein 1 [Source:HGNC Symbol;Acc:1587]	CCNDBP1	protein_coding	3.30839	6.79884	10.6941	5.08795	6.39702	4.81181	7.50238	4.95431	21.1476	4.25e-06	0.000401458
ENSG00000154553	PDZ and LIM domain 3 [Source:HGNC Symbol;Acc:20767]	PDLIM3	protein_coding	-5.0741	7.73943	4.52716	9.65068	1.24545	6.31705	1.56909	8.79738	21.0416	4.49e-06	0.000418391
ENSG00000169903	transmembrane 4 L six family member 4 [Source:HGNC Symbol;Acc:11856]	TM4SF4	protein_coding	-10.3108	7.54815	5.74057	8.56339	-0.0931393	9.75318	1.27917	9.27397	20.7601	5.21e-06	0.000477993
ENSG00000219073	chymotrypsin-like elastase family, member 3B [Source:HGNC Symbol;Acc:15945]	CELA3B	protein_coding	11.143	12.9428	2.72607	3.32088	13.4066	3.23602	13.3073	3.275	20.6051	5.64e-06	0.000511289
ENSG00000104760	fibrinogen-like 1 [Source:HGNC Symbol;Acc:3695]	FGL1	protein_coding	11.6204	7.68018	1.41864	0.353986	7.99964	0.64477	7.90736	0.492064	20.2846	6.67e-06	0.000596433
ENSG00000196260	surfactant associated 2 [Source:HGNC Symbol;Acc:18386]	SFTA2	protein_coding	-8.57678	3.40221	1.41864	4.25554	-0.0931393	5.51656	-0.0292957	4.99698	20.1604	7.12e-06	0.000628079
ENSG00000163082	sphingosine-1-phosphate phosphatase 2 [Source:HGNC Symbol;Acc:19953]	SGPP2	protein_coding	-6.02456	2.95899	1.41864	4.46664	0.0863826	4.60765	0.138623	4.53995	19.8629	8.32e-06	0.000716726
ENSG00000107263	Rap guanine nucleotide exchange factor (GEF) 1 [Source:HGNC Symbol;Acc:4568]	RAPGEF1	protein_coding	6.00498	3.35586	7.34938	1.58265	2.88232	0.762462	3.75835	1.27047	19.8582	8.34e-06	0.000716726
ENSG00000112414	G protein-coupled receptor 126 [Source:HGNC Symbol;Acc:13841]	GPR126	protein_coding	-10.0338	4.80829	1.41864	6.08663	-0.0931393	6.74634	-0.0292957	6.46813	19.8103	8.55e-06	0.000725634
ENSG00000131148	ER membrane protein complex subunit 8 [Source:HGNC Symbol;Acc:7864]	EMC8	protein_coding	-7.97178	5.28257	1.41864	4.07456	0.454373	7.18912	0.486544	6.34065	19.7058	9.03e-06	0.000756829
ENSG00000084112	slingshot protein phosphatase 1 [Source:HGNC Symbol;Acc:30579]	SSH1	protein_coding	-4.63368	5.97003	1.41864	6.02004	3.19346	8.09855	3.152	7.40857	19.5884	9.61e-06	0.000794848
ENSG00000180730	shisa family member 2 [Source:HGNC Symbol;Acc:20366]	SHISA2	protein_coding	-10.4437	6.79805	1.41864	8.85112	-0.0931393	6.96573	-0.0292957	8.20809	19.5331	9.89e-06	0.00080802
ENSG00000112759	solute carrier family 29 (equilibrative nucleoside transporter), member 1 [Source:HGNC Symbol;Acc:11003]	SLC29A1	protein_coding	9.46742	6.34846	11.1777	0.353986	4.41242	0.755588	7.33729	0.550076	19.5104	1e-05	0.00080802
ENSG00000163975	antigen p97 (melanoma associated) identified by monoclonal antibodies 133.2 and 96.5 [Source:HGNC Symbol;Acc:7037]	MFI2	protein_coding	-6.6441	2.82539	1.41864	3.21835	0.0516699	4.73996	0.105979	4.20363	19.4717	1.02e-05	0.000814737
ENSG00000067836	rogdi homolog (Drosophila) [Source:HGNC Symbol;Acc:29478]	ROGDI	protein_coding	-8.92934	3.49398	1.41864	2.67901	-0.0931393	6.25862	-0.0292957	5.31155	19.357	1.08e-05	0.000854983
ENSG00000205423	CTD nuclear envelope phosphatase 1 regulatory subunit 1 [Source:HGNC Symbol;Acc:26759]	CNEP1R1	protein_coding	-5.35196	5.971	2.45778	6.39848	2.12327	7.90202	2.13125	7.30414	19.1923	1.18e-05	0.000908905
ENSG00000115386	regenerating islet-derived 1 alpha [Source:HGNC Symbol;Acc:9951]	REG1A	protein_coding	6.51718	15.037	13.1975	3.85875	15.4566	10.4172	15.3784	9.43928	19.1852	1.19e-05	0.000908905
ENSG00000166979	eva-1 homolog C (C. elegans) [Source:HGNC Symbol;Acc:13239]	EVA1C	protein_coding	-9.0138	4.07865	1.41864	5.93001	-0.0931393	5.28221	-0.0292957	5.63252	19.174	1.19e-05	0.000908905
ENSG00000090382	lysozyme [Source:HGNC Symbol;Acc:6740]	LYZ	protein_coding	-3.55466	7.6927	6.56228	7.10095	4.83822	9.52402	4.99365	8.77726	19.1066	1.24e-05	0.000931034
ENSG00000170927	polycystic kidney and hepatic disease 1 (autosomal recessive) [Source:HGNC Symbol;Acc:9016]	PKHD1	protein_coding	-6.68821	3.92869	1.41864	6.85503	-0.0931393	3.30422	-0.0292957	5.93615	18.9647	1.33e-05	0.000991723
ENSG00000174606	angel homolog 2 (Drosophila) [Source:HGNC Symbol;Acc:30534]	ANGEL2	protein_coding	-3.41436	5.32186	3.51456	4.3785	2.9351	7.53101	2.95679	6.70696	18.5686	1.64e-05	0.00120728
ENSG00000197632	serpin peptidase inhibitor, clade B (ovalbumin), member 2 [Source:HGNC Symbol;Acc:8584]	SERPINB2	protein_coding	-10.8436	5.62113	1.41864	6.53876	-0.0931393	7.67066	-0.0292957	7.20447	18.3091	1.88e-05	0.00136835
ENSG00000185615	protein disulfide isomerase family A, member 2 [Source:HGNC Symbol;Acc:14180]	PDIA2	protein_coding	8.83654	5.00435	1.41864	0.353986	5.39976	0.64477	5.32928	0.492064	18.2219	1.97e-05	0.00141705
ENSG00000015413	dipeptidase 1 (renal) [Source:HGNC Symbol;Acc:3002]	DPEP1	protein_coding	8.51396	4.70568	1.41864	0.353986	5.34021	0.64477	5.26903	0.492064	18.1099	2.09e-05	0.00148688
ENSG00000176463	solute carrier organic anion transporter family, member 3A1 [Source:HGNC Symbol;Acc:10952]	SLCO3A1	protein_coding	-5.29955	5.90521	2.88592	8.3968	0.657245	5.16109	0.791448	7.52769	17.9582	2.26e-05	0.00159326
ENSG00000112299	vanin 1 [Source:HGNC Symbol;Acc:12705]	VNN1	protein_coding	-8.1743	5.96644	1.41864	6.67651	0.639129	8.35938	0.662834	7.74245	17.4853	2.9e-05	0.00202164
ENSG00000141086	chymotrypsin-like [Source:HGNC Symbol;Acc:2524]	CTRL	protein_coding	12.2323	8.30832	1.41864	1.90423	8.71191	0.64477	8.61679	1.47326	17.3797	3.06e-05	0.00211508
ENSG00000204385	solute carrier family 44, member 4 [Source:HGNC Symbol;Acc:13941]	SLC44A4	protein_coding	-4.4761	5.11098	3.46827	5.07277	1.94995	7.03422	2.02528	6.36431	17.1626	3.43e-05	0.00234694
ENSG00000135974	chromosome 2 open reading frame 49 [Source:HGNC Symbol;Acc:28772]	C2orf49	protein_coding	-4.39082	4.59034	1.41864	6.33005	1.85949	6.25616	1.844	6.29268	17.0038	3.73e-05	0.00252588
ENSG00000093072	cat eye syndrome chromosome region, candidate 1 [Source:HGNC Symbol;Acc:1839]	CECR1	protein_coding	-3.87087	4.31332	2.03217	3.1299	1.95673	6.48402	1.9551	5.49803	16.9263	3.89e-05	0.00260473
ENSG00000010292	non-SMC condensin I complex, subunit D2 [Source:HGNC Symbol;Acc:24305]	NCAPD2	protein_coding	-7.74827	5.30238	1.41864	5.53046	0.467606	7.53628	0.499172	6.88345	16.8854	3.97e-05	0.00263506
ENSG00000196865	NHL repeat containing 2 [Source:HGNC Symbol;Acc:24731]	NHLRC2	protein_coding	-5.08924	4.6042	2.0036	4.93286	1.21753	6.95217	1.24272	6.24509	16.8337	4.08e-05	0.00268133
ENSG00000136943	cathepsin V [Source:HGNC Symbol;Acc:2538]	CTSV	protein_coding	-8.43321	5.5429	1.41864	7.18798	-0.0931393	4.97639	-0.0292957	6.48641	16.7432	4.28e-05	0.00277346
ENSG00000188549	chromosome 15 open reading frame 52 [Source:HGNC Symbol;Acc:33488]	C15orf52	protein_coding	-6.18531	4.90534	2.0036	3.68235	0.780456	7.19895	0.828443	6.34384	16.7293	4.31e-05	0.00277346
ENSG00000117632	stathmin 1 [Source:HGNC Symbol;Acc:6510]	STMN1	protein_coding	-4.1333	6.89427	3.35221	9.17198	2.23485	6.99362	2.28351	8.46934	16.7146	4.34e-05	0.00277346
ENSG00000085276	MDS1 and EVI1 complex locus [Source:HGNC Symbol;Acc:3498]	MECOM	protein_coding	7.63468	6.18662	2.0036	0.353986	6.83674	1.14121	6.75166	0.768535	16.6896	4.4e-05	0.00278381
ENSG00000240583	aquaporin 1 (Colton blood group) [Source:HGNC Symbol;Acc:633]	AQP1	protein_coding	-5.92085	6.36168	1.41864	8.93244	-0.0931393	2.24713	-0.0292957	7.94117	16.5588	4.72e-05	0.00295034
ENSG00000092421	sema domain, transmembrane domain (TM), and cytoplasmic domain, (semaphorin) 6A [Source:HGNC Symbol;Acc:10738]	SEMA6A	protein_coding	-6.74046	5.7776	1.41864	7.49832	0.825799	6.7968	0.841608	7.19562	16.5439	4.75e-05	0.00295034
ENSG00000171124	fucosyltransferase 3 (galactoside 3(4)-L-fucosyltransferase, Lewis blood group) [Source:HGNC Symbol;Acc:4014]	FUT3	protein_coding	-8.18883	4.355	1.41864	5.54596	-0.0429601	5.47235	0.01749	5.51118	16.5203	4.81e-05	0.00295994
ENSG00000243955	glutathione S-transferase alpha 1 [Source:HGNC Symbol;Acc:4626]	GSTA1	protein_coding	9.3439	5.43666	1.41864	0.353986	6.00426	0.64477	5.92529	0.492064	16.4846	4.9e-05	0.00298868
ENSG00000146674	insulin-like growth factor binding protein 3 [Source:HGNC Symbol;Acc:5472]	IGFBP3	protein_coding	-8.5999	3.71792	1.41864	5.26126	-0.0931393	5.11786	-0.0292957	5.20086	16.3239	5.34e-05	0.00322387
ENSG00000123689	G0/G1switch 2 [Source:HGNC Symbol;Acc:30229]	G0S2	protein_coding	11.2775	7.27521	1.41864	0.353986	7.69085	0.64477	7.59972	0.492064	16.2854	5.45e-05	0.00326072
ENSG00000128581	RAB, member RAS oncogene family-like 5 [Source:HGNC Symbol;Acc:21895]	RABL5	protein_coding	-2.90543	5.33614	3.97935	6.94561	3.04561	6.68166	3.09007	6.82112	16.1626	5.81e-05	0.00343466
ENSG00000114638	uroplakin 1B [Source:HGNC Symbol;Acc:12578]	UPK1B	protein_coding	-3.70832	5.6521	2.27463	6.18866	3.41647	7.64302	3.38248	7.09158	16.1534	5.84e-05	0.00343466
ENSG00000197555	signal-induced proliferation-associated 1 like 1 [Source:HGNC Symbol;Acc:20284]	SIPA1L1	protein_coding	-4.21055	4.92475	1.41864	5.67196	2.35426	6.74608	2.32834	6.31312	16.0751	6.09e-05	0.00354844
ENSG00000125814	N-ethylmaleimide-sensitive factor attachment protein, beta [Source:HGNC Symbol;Acc:15751]	NAPB	protein_coding	-3.17094	6.03877	6.53634	7.92184	3.051	7.09212	3.53052	7.55667	16.0533	6.16e-05	0.00355852
ENSG00000136950	actin related protein 2/3 complex, subunit 5-like [Source:HGNC Symbol;Acc:23366]	ARPC5L	protein_coding	6.06408	4.55021	6.41864	1.31048	4.88725	1.23422	5.01023	1.27419	15.9196	6.61e-05	0.00378629
ENSG00000134046	methyl-CpG binding domain protein 2 [Source:HGNC Symbol;Acc:6917]	MBD2	protein_coding	6.4427	4.65157	7.76737	2.72307	4.93348	0.959721	5.3252	2.1017	15.9001	6.68e-05	0.00379322
ENSG00000142102	ATH1, acid trehalase-like 1 (yeast) [Source:HGNC Symbol;Acc:26210]	ATHL1	protein_coding	7.70491	4.9642	5.32553	0.353986	5.53666	0.865351	5.52465	0.609287	15.7814	7.11e-05	0.00400476
ENSG00000146038	doublecortin domain containing 2 [Source:HGNC Symbol;Acc:18141]	DCDC2	protein_coding	-6.02604	6.54829	1.41864	8.50448	0.978502	6.76398	0.98847	7.88376	15.6547	7.6e-05	0.00424659
ENSG00000086475	selenophosphate synthetase 1 [Source:HGNC Symbol;Acc:19685]	SEPHS1	protein_coding	-6.28588	4.83524	1.41864	6.4008	0.648364	6.18436	0.671371	6.30451	15.63	7.7e-05	0.00426681
ENSG00000171617	ectodermal-neural cortex 1 (with BTB domain) [Source:HGNC Symbol;Acc:3345]	ENC1	protein_coding	-7.71705	5.38365	2.0036	7.09175	0.0137284	6.27994	0.118586	6.75357	15.6054	7.8e-05	0.00428718
ENSG00000227036	long intergenic non-protein coding RNA 511 [Source:HGNC Symbol;Acc:43564]	LINC00511	lincRNA	-4.49038	3.46256	2.17566	3.41318	0.667651	5.52741	0.735256	4.83328	15.5387	8.08e-05	0.00437975
ENSG00000141337	arylsulfatase G [Source:HGNC Symbol;Acc:24102]	ARSG	protein_coding	-3.68587	6.28656	5.01498	7.51842	2.85704	7.692	3.02561	7.60609	15.5343	8.1e-05	0.00437975
ENSG00000162545	calcium/calmodulin-dependent protein kinase II inhibitor 1 [Source:HGNC Symbol;Acc:24190]	CAMK2N1	protein_coding	-6.56021	3.83947	1.41864	4.39071	0.281776	6.20328	0.323047	5.49419	15.4548	8.45e-05	0.00453145
ENSG00000015475	BH3 interacting domain death agonist [Source:HGNC Symbol;Acc:1050]	BID	protein_coding	-4.28036	5.22027	3.23422	6.53538	2.00216	7.09959	2.0572	6.83874	15.4092	8.66e-05	0.00460505
ENSG00000188917	tRNA methyltransferase 2 homolog B (S. cerevisiae) [Source:HGNC Symbol;Acc:25748]	TRMT2B	protein_coding	-3.77446	4.88824	3.87807	5.85008	1.96329	6.72391	2.08138	6.35925	15.3709	8.83e-05	0.0046326
ENSG00000153561	required for meiotic nuclear division 5 homolog A (S. cerevisiae) [Source:HGNC Symbol;Acc:25850]	RMND5A	protein_coding	5.89189	7.57432	12.2704	5.65147	6.07795	1.78722	8.57193	4.81032	15.3561	8.9e-05	0.0046326
ENSG00000175984	DENN/MADD domain containing 2C [Source:HGNC Symbol;Acc:24748]	DENND2C	protein_coding	-3.13949	5.42141	4.53717	5.41003	3.05362	7.44127	3.14222	6.7725	15.3535	8.92e-05	0.0046326
ENSG00000089289	immunoglobulin (CD79A) binding protein 1 [Source:HGNC Symbol;Acc:5461]	IGBP1	protein_coding	9.77721	6.11304	1.41864	5.98351	6.37216	0.64477	6.29068	5.05376	15.3111	9.12e-05	0.00470135
ENSG00000187840	eukaryotic translation initiation factor 4E binding protein 1 [Source:HGNC Symbol;Acc:3288]	EIF4EBP1	protein_coding	8.42572	5.70003	1.41864	5.22797	6.09233	0.755588	6.01305	4.37274	15.2475	9.43e-05	0.0048252
ENSG00000166825	alanyl (membrane) aminopeptidase [Source:HGNC Symbol;Acc:500]	ANPEP	protein_coding	8.43655	7.27229	6.09107	0.90105	7.6629	1.24235	7.60212	1.06813	15.1642	9.86e-05	0.00500471
ENSG00000268083	Delta(3,5)-Delta(2,4)-dienoyl-CoA isomerase, mitochondrial [Source:UniProtKB/TrEMBL;Acc:M0QXS7]	AC104534.3	protein_coding	6.68562	3.02843	1.41864	0.353986	3.66115	0.64477	3.61314	0.492064	15.1354	0.000100068	0.00504326
ENSG00000235162	chromosome 12 open reading frame 75 [Source:HGNC Symbol;Acc:35164]	C12orf75	protein_coding	-6.09051	4.03525	1.41864	5.17657	0.542609	6.1059	0.570731	5.72185	14.9743	0.000108988	0.00544767
ENSG00000023171	GRAM domain containing 1B [Source:HGNC Symbol;Acc:29214]	GRAMD1B	protein_coding	-6.84678	2.32936	1.41864	3.98389	-0.0931393	3.88958	-0.0292957	3.93829	14.9617	0.000109717	0.00544767
ENSG00000131941	rhophilin, Rho GTPase binding protein 2 [Source:HGNC Symbol;Acc:19974]	RHPN2	protein_coding	-6.24266	5.57136	1.41864	7.04553	0.998617	7.39292	1.00825	7.23106	14.9184	0.000112261	0.00553296
ENSG00000035664	death-associated protein kinase 2 [Source:HGNC Symbol;Acc:2675]	DAPK2	protein_coding	-3.41877	4.84338	1.69365	5.24109	2.87455	6.94042	2.84275	6.31338	14.8572	0.000115963	0.00567374
ENSG00000058091	cyclin-dependent kinase 14 [Source:HGNC Symbol;Acc:8883]	CDK14	protein_coding	-5.81758	4.78992	1.41864	4.36081	1.17593	7.15269	1.1792	6.27305	14.8214	0.000118185	0.00574054
ENSG00000214706	interferon-related developmental regulator 2 [Source:HGNC Symbol;Acc:5457]	IFRD2	protein_coding	8.96427	5.04353	1.41864	0.353986	5.63418	0.64477	5.55808	0.492064	14.7766	0.000121031	0.00583647
ENSG00000123095	basic helix-loop-helix family, member e41 [Source:HGNC Symbol;Acc:16617]	BHLHE41	protein_coding	-6.77051	2.22674	1.41864	3.74268	-0.0931393	3.87372	-0.0292957	3.80861	14.7264	0.000124293	0.00595098
ENSG00000068078	fibroblast growth factor receptor 3 [Source:HGNC Symbol;Acc:3690]	FGFR3	protein_coding	-7.55376	3.34247	1.41864	5.2823	-0.0931393	3.84131	-0.0292957	4.73442	14.6711	0.000127994	0.0060847
ENSG00000101844	autophagy related 4A, cysteine peptidase [Source:HGNC Symbol;Acc:16489]	ATG4A	protein_coding	-7.47574	3.32075	1.41864	4.82257	-0.0931393	4.26324	-0.0292957	4.57319	14.5909	0.00013356	0.00630459
ENSG00000015153	YY1 associated factor 2 [Source:HGNC Symbol;Acc:17363]	YAF2	protein_coding	-3.76319	4.61238	2.0036	7.43494	0.849587	4.24975	0.893356	6.5603	14.4428	0.000144483	0.0067725
ENSG00000157191	NECAP endocytosis associated 2 [Source:HGNC Symbol;Acc:25528]	NECAP2	protein_coding	-4.6071	6.30023	1.41864	2.19419	3.30501	8.74179	3.26195	7.73687	14.285	0.00015711	0.00731323
ENSG00000100979	phospholipid transfer protein [Source:HGNC Symbol;Acc:9093]	PLTP	protein_coding	8.76452	4.84586	1.41864	0.353986	5.35691	0.64477	5.28657	0.492064	14.2335	0.000161467	0.00745068
ENSG00000160862	alpha-2-glycoprotein 1, zinc-binding [Source:HGNC Symbol;Acc:910]	AZGP1	protein_coding	9.91753	5.92868	1.41864	0.353986	6.43959	0.64477	6.35727	0.492064	14.224	0.000162285	0.00745068
ENSG00000184956	mucin 6, oligomeric mucus/gel-forming [Source:HGNC Symbol;Acc:7517]	MUC6	protein_coding	-8.4368	5.22125	1.41864	7.29781	-0.0429601	5.58109	0.01749	6.69365	14.0984	0.000173489	0.00784379
ENSG00000106692	fukutin [Source:HGNC Symbol;Acc:3622]	FKTN	protein_coding	-5.20111	5.25732	2.54297	6.67793	1.66043	7.06424	1.69159	6.87092	14.0972	0.000173602	0.00784379
ENSG00000198515	cyclic nucleotide gated channel alpha 1 [Source:HGNC Symbol;Acc:2148]	CNGA1	protein_coding	-5.14495	2.9355	2.89372	4.57574	0.0529208	4.62226	0.267303	4.5992	14.089	0.000174358	0.00784379
ENSG00000257594	UDP-N-acetyl-alpha-D-galactosamine:polypeptide N-acetylgalactosaminyltransferase 4 (GalNAc-T4) [Source:HGNC Symbol;Acc:4126]	GALNT4	protein_coding	-4.09457	2.9224	1.41864	4.63026	0.724553	4.36511	0.744396	4.50386	14.0434	0.000178642	0.00798291
ENSG00000206538	vestigial like 3 (Drosophila) [Source:HGNC Symbol;Acc:24327]	VGLL3	protein_coding	-6.62334	3.94422	1.41864	6.44758	0.0109264	4.5317	0.067972	5.79683	13.9679	0.000185961	0.00825496
ENSG00000071205	Rho GTPase activating protein 10 [Source:HGNC Symbol;Acc:26099]	ARHGAP10	protein_coding	7.50516	3.69822	1.41864	0.353986	4.23803	0.64477	4.17931	0.492064	13.8792	0.000194943	0.00859672
ENSG00000104892	kinesin light chain 3 [Source:HGNC Symbol;Acc:20717]	KLC3	protein_coding	-3.06147	4.27411	2.04157	4.07014	2.45228	6.11478	2.43593	5.46986	13.8619	0.000196742	0.00861937
ENSG00000023445	baculoviral IAP repeat containing 3 [Source:HGNC Symbol;Acc:591]	BIRC3	protein_coding	-6.11433	7.71124	1.41864	8.07715	3.65757	9.46951	3.60885	8.93822	13.7515	0.000208652	0.00908178
ENSG00000153822	potassium inwardly-rectifying channel, subfamily J, member 16 [Source:HGNC Symbol;Acc:6262]	KCNJ16	protein_coding	-5.42528	3.05209	1.41864	4.84219	0.243453	4.30168	0.286472	4.58557	13.5082	0.000237523	0.0102717
ENSG00000167173	chromosome 15 open reading frame 39 [Source:HGNC Symbol;Acc:24497]	C15orf39	protein_coding	-6.77829	5.10042	1.41864	3.67355	0.759566	7.15932	0.778111	6.29397	13.4606	0.000243623	0.010468
ENSG00000116521	secretory carrier membrane protein 3 [Source:HGNC Symbol;Acc:10565]	SCAMP3	protein_coding	5.83223	5.60141	8.289	1.25841	5.82622	2.28374	6.14796	1.80181	13.3688	0.000255838	0.0109228
ENSG00000173281	protein phosphatase 1, regulatory subunit 3B [Source:HGNC Symbol;Acc:14942]	PPP1R3B	protein_coding	-2.71229	6.01663	3.41141	5.7803	4.46287	7.58743	4.42414	6.96421	13.3289	0.000261354	0.0110877
ENSG00000008513	ST3 beta-galactoside alpha-2,3-sialyltransferase 1 [Source:HGNC Symbol;Acc:10862]	ST3GAL1	protein_coding	-4.16353	6.64697	2.49246	7.26767	4.01856	8.82171	3.97557	8.22609	13.2997	0.000265443	0.0111903
ENSG00000070190	dual adaptor of phosphotyrosine and 3-phosphoinositides [Source:HGNC Symbol;Acc:16500]	DAPP1	protein_coding	-3.30831	5.46279	4.43834	7.38574	2.55298	6.61556	2.67439	7.0578	13.275	0.000268968	0.0112681
ENSG00000196975	annexin A4 [Source:HGNC Symbol;Acc:542]	ANXA4	protein_coding	-3.03129	8.9484	6.96692	10.6145	6.57883	10.0212	6.60358	10.3478	13.2365	0.000274545	0.0114303
ENSG00000079819	erythrocyte membrane protein band 4.1-like 2 [Source:HGNC Symbol;Acc:3379]	EPB41L2	protein_coding	-6.38376	3.61209	1.41864	3.63938	0.310191	5.8534	0.349641	5.07572	13.1423	0.000288696	0.0118823
ENSG00000049323	latent transforming growth factor beta binding protein 1 [Source:HGNC Symbol;Acc:6714]	LTBP1	protein_coding	-8.11488	4.98067	1.41864	6.22471	0.190554	6.8707	0.2367	6.58413	13.1407	0.000288947	0.0118823
ENSG00000170522	ELOVL fatty acid elongase 6 [Source:HGNC Symbol;Acc:15829]	ELOVL6	protein_coding	-3.86286	3.4456	1.41864	3.33991	1.54648	5.55057	1.53876	4.82762	13.1015	0.000295056	0.0120595
ENSG00000132498	ankyrin repeat domain 20 family, member A3 [Source:HGNC Symbol;Acc:31981]	ANKRD20A3	protein_coding	5.32777	2.31928	3.89502	0.353986	2.54821	0.832859	2.61779	0.590757	13.0736	0.000299493	0.0121667
ENSG00000063046	eukaryotic translation initiation factor 4B [Source:HGNC Symbol;Acc:3285]	EIF4B	protein_coding	3.22131	8.8738	9.97987	7.70607	9.15279	6.64259	9.22337	7.26925	12.9982	0.000311792	0.01259
ENSG00000198513	atlastin GTPase 1 [Source:HGNC Symbol;Acc:11231]	ATL1	protein_coding	-5.88073	3.65401	1.41864	4.58383	0.384104	5.946	0.419772	5.36348	12.9868	0.000313701	0.0125913
ENSG00000168803	adenosine deaminase-like [Source:HGNC Symbol;Acc:31853]	ADAL	protein_coding	-6.13966	3.10545	1.41864	3.60379	0.156988	4.64285	0.205295	4.1663	12.9716	0.000316252	0.0126181
ENSG00000080493	solute carrier family 4 (sodium bicarbonate cotransporter), member 4 [Source:HGNC Symbol;Acc:11030]	SLC4A4	protein_coding	-5.7039	8.0174	1.41864	10.3688	2.35431	8.33629	2.32873	9.68267	12.82	0.000342926	0.0136014
ENSG00000163075	Primary ciliary dyskinesia protein 1 [Source:UniProtKB/Swiss-Prot;Acc:Q4G0U5]	PCDP1	protein_coding	-2.9899	4.36636	4.37563	6.69782	1.52093	4.86365	1.76938	6.03276	12.7305	0.000359746	0.0141846
ENSG00000148672	glutamate dehydrogenase 1 [Source:HGNC Symbol;Acc:4335]	GLUD1	protein_coding	8.09001	6.86727	3.41864	7.83048	7.03746	0.969874	6.95589	6.83288	12.6982	0.000366006	0.014347
ENSG00000157423	HYDIN, axonemal central pair apparatus protein [Source:HGNC Symbol;Acc:19368]	HYDIN	protein_coding	-7.27638	4.33344	1.41864	6.01398	0.0594237	5.50329	0.113509	5.7801	12.6803	0.000369519	0.0144005
ENSG00000111785	RIC8 guanine nucleotide exchange factor B [Source:HGNC Symbol;Acc:25555]	RIC8B	protein_coding	-5.94082	5.10815	1.41864	6.47253	0.565	5.85632	0.591907	6.20432	12.5692	0.000392158	0.0151944
ENSG00000139613	SWI/SNF related, matrix associated, actin dependent regulator of chromatin, subfamily c, member 2 [Source:HGNC Symbol;Acc:11105]	SMARCC2	protein_coding	-2.56701	5.78819	6.30275	6.85008	3.38781	6.85354	3.73003	6.85169	12.4811	0.000411097	0.0158367
ENSG00000152457	DNA cross-link repair 1C [Source:HGNC Symbol;Acc:17642]	DCLRE1C	protein_coding	5.31379	6.79138	11.4413	4.4907	5.55676	1.96414	7.77068	3.83261	12.4471	0.000418632	0.0160348
ENSG00000188785	zinc finger protein 548 [Source:HGNC Symbol;Acc:26561]	ZNF548	protein_coding	-3.58892	5.63571	4.13453	6.64375	2.92152	7.01047	2.98805	6.83817	12.4234	0.000423994	0.0161479
ENSG00000162777	DENN/MADD domain containing 2D [Source:HGNC Symbol;Acc:26192]	DENND2D	protein_coding	-7.98877	4.62455	1.41864	6.37991	0.091939	6.63301	0.143604	6.51289	12.3669	0.000437017	0.0165465
ENSG00000153291	solute carrier family 25, member 27 [Source:HGNC Symbol;Acc:21065]	SLC25A27	protein_coding	-7.45878	3.63283	1.41864	2.88744	0.0951712	6.34611	0.146732	5.44662	12.3567	0.000439396	0.0165465
ENSG00000089916	G patch domain containing 2-like [Source:HGNC Symbol;Acc:20210]	GPATCH2L	protein_coding	-3.92086	6.26843	3.04858	6.49129	3.51173	8.259	3.49386	7.58471	12.3411	0.000443089	0.0165923
ENSG00000124875	chemokine (C-X-C motif) ligand 6 [Source:HGNC Symbol;Acc:10643]	CXCL6	protein_coding	-4.51279	4.0297	2.0036	6.46087	-0.0931393	1.67498	0.0214397	5.54456	12.3289	0.000446	0.0166085
ENSG00000114541	FERM domain containing 4B [Source:HGNC Symbol;Acc:24886]	FRMD4B	protein_coding	-4.34753	5.94193	1.41864	4.91005	3.44163	8.24479	3.39734	7.33235	12.3033	0.000452157	0.0167448
ENSG00000184674	glutathione S-transferase theta 1 [Source:HGNC Symbol;Acc:4641]	GSTT1	protein_coding	8.3597	5.09084	8.40732	4.91277	4.87431	0.64477	5.5109	3.87896	12.2606	0.000462614	0.0170379
ENSG00000155621	chromosome 9 open reading frame 85 [Source:HGNC Symbol;Acc:28784]	C9orf85	protein_coding	-3.14301	5.96573	5.55655	5.30186	3.24391	7.64317	3.43987	6.90357	12.2225	0.000472159	0.0172944
ENSG00000130177	cell division cycle 16 [Source:HGNC Symbol;Acc:1720]	CDC16	protein_coding	5.99025	6.30332	9.6901	4.42253	6.38165	1.87955	6.99681	3.67104	12.1601	0.000488224	0.0177857
ENSG00000105514	RAB3D, member RAS oncogene family [Source:HGNC Symbol;Acc:9779]	RAB3D	protein_coding	4.95619	6.51824	3.30811	1.70835	7.01377	2.81045	6.93195	2.32459	12.1396	0.000493633	0.0178855
ENSG00000068654	polymerase (RNA) I polypeptide A, 194kDa [Source:HGNC Symbol;Acc:17264]	POLR1A	protein_coding	-2.9633	5.16032	4.92707	5.81453	2.76932	7.11802	2.9372	6.59736	12.1049	0.000502895	0.0181232
ENSG00000125898	family with sequence similarity 110, member A [Source:HGNC Symbol;Acc:16188]	FAM110A	protein_coding	2.49601	3.34132	7.0036	2.44776	2.85024	2.17273	3.56708	2.32372	12.0684	0.000512841	0.0183828
ENSG00000133812	SET binding factor 2 [Source:HGNC Symbol;Acc:2135]	SBF2	protein_coding	-2.50199	6.40613	4.94784	6.30585	4.91037	8.46256	4.91022	7.76306	12.0029	0.000531179	0.0189388
ENSG00000157837	signal peptide peptidase like 3 [Source:HGNC Symbol;Acc:30424]	SPPL3	protein_coding	-3.05231	3.84076	4.22599	4.88433	1.42734	5.99345	1.66079	5.54166	11.9922	0.000534228	0.0189467
ENSG00000184640	septin 9 [Source:HGNC Symbol;Acc:7323]	SETP9	protein_coding	-4.05125	3.39011	2.41864	5.00438	0.70693	4.65862	0.789033	4.82885	11.9799	0.00053777	0.0189719
ENSG00000074657	zinc finger protein 532 [Source:HGNC Symbol;Acc:30940]	ZNF532	protein_coding	-3.37681	5.55531	2.49246	6.33696	3.29898	7.4327	3.26936	6.96289	11.9518	0.000545954	0.0191598
ENSG00000171303	potassium channel, subfamily K, member 3 [Source:HGNC Symbol;Acc:6278]	KCNK3	protein_coding	5.4284	6.34765	3.44721	2.94315	7.07792	2.39218	6.99472	2.68768	11.9309	0.000552096	0.0192232
ENSG00000088367	erythrocyte membrane protein band 4.1-like 1 [Source:HGNC Symbol;Acc:3378]	EPB41L1	protein_coding	-4.34867	4.63019	3.87807	6.03622	1.30523	5.96923	1.49828	6.00145	11.9262	0.000553494	0.0192232
ENSG00000105516	D site of albumin promoter (albumin D-box) binding protein [Source:HGNC Symbol;Acc:2697]	DBP	protein_coding	-2.94473	2.62554	1.41864	3.59753	1.04273	3.80137	1.05049	3.69842	11.9104	0.000558223	0.0192875
ENSG00000068793	cytoplasmic FMR1 interacting protein 1 [Source:HGNC Symbol;Acc:13759]	CYFIP1	protein_coding	8.97677	5.208	1.41864	4.57563	5.81153	0.64477	5.73539	3.67939	11.8233	0.000584933	0.020073
ENSG00000168300	protein-L-isoaspartate (D-aspartate) O-methyltransferase domain containing 1 [Source:HGNC Symbol;Acc:30483]	PCMTD1	protein_coding	3.12692	5.83202	7.99607	3.36855	6.22436	4.43153	6.41968	3.97897	11.8169	0.000586949	0.020073
ENSG00000114771	arylacetamide deacetylase [Source:HGNC Symbol;Acc:17]	AADAC	protein_coding	10.9892	8.52367	1.41864	1.62167	8.93378	0.768999	8.83805	1.2811	11.7523	0.000607671	0.0206092
ENSG00000100554	ATPase, H+ transporting, lysosomal 34kDa, V1 subunit D [Source:HGNC Symbol;Acc:13527]	ATP6V1D	protein_coding	-2.8434	7.5546	5.36397	8.61753	5.50308	9.21273	5.4947	8.94068	11.7489	0.000608776	0.0206092
ENSG00000197044	zinc finger protein 441 [Source:HGNC Symbol;Acc:20875]	ZNF441	protein_coding	-5.18705	5.43071	1.41864	7.85949	0.102167	3.67553	0.153516	6.98634	11.7047	0.000623421	0.020999
ENSG00000114127	5'-3' exoribonuclease 1 [Source:HGNC Symbol;Acc:30654]	XRN1	protein_coding	-3.26024	6.80968	4.18311	7.42185	4.78224	8.22602	4.75733	7.88516	11.6643	0.000637098	0.0213155
ENSG00000142875	protein kinase, cAMP-dependent, catalytic, beta [Source:HGNC Symbol;Acc:9381]	PRKACB	protein_coding	-5.79269	3.024	1.41864	2.69903	0.269355	5.1701	0.310982	4.40613	11.6583	0.000639178	0.0213155
ENSG00000092020	protein phosphatase 2, regulatory subunit B'', gamma [Source:HGNC Symbol;Acc:17485]	PPP2R3C	protein_coding	9.24931	5.33579	1.41864	1.5737	5.98059	0.64477	5.90271	1.21627	11.6308	0.000648689	0.0215256
ENSG00000185722	ankyrin repeat and FYVE domain containing 1 [Source:HGNC Symbol;Acc:20763]	ANKFY1	protein_coding	-3.41846	4.72367	4.57326	6.71922	1.74162	6.50896	1.98514	6.61678	11.518	0.000689244	0.0227586
ENSG00000186395	keratin 10 [Source:HGNC Symbol;Acc:6413]	KRT10	protein_coding	-4.5123	3.47244	1.41864	2.08262	1.08649	5.42367	1.09266	4.57578	11.5034	0.000694684	0.0228258
ENSG00000167766	zinc finger protein 83 [Source:HGNC Symbol;Acc:13158]	ZNF83	protein_coding	-4.05366	6.95735	2.0036	6.67678	4.7907	9.20189	4.7285	8.44156	11.4433	0.00071754	0.0234618
ENSG00000185670	zinc finger and BTB domain containing 3 [Source:HGNC Symbol;Acc:22918]	ZBTB3	protein_coding	-3.39206	3.53205	3.53634	5.69043	0.88895	4.29866	1.0846	5.13821	11.398	0.000735241	0.0239239
ENSG00000069966	guanine nucleotide binding protein (G protein), beta 5 [Source:HGNC Symbol;Acc:4401]	GNB5	protein_coding	-4.27231	3.87432	4.20628	4.49105	0.667192	5.80992	1.03897	5.2755	11.3645	0.000748595	0.0242407
ENSG00000198363	aspartate beta-hydroxylase [Source:HGNC Symbol;Acc:757]	ASPH	protein_coding	-3.05298	7.04805	1.84087	6.92979	5.44546	8.65318	5.37406	8.03999	11.2616	0.000791286	0.0254999
ENSG00000085831	tetratricopeptide repeat domain 39A [Source:HGNC Symbol;Acc:18657]	TTC39A	protein_coding	-5.25461	4.49287	3.0036	6.38266	0.573816	6.40158	0.733775	6.39166	11.242	0.000799668	0.025527
ENSG00000139793	muscleblind-like splicing regulator 2 [Source:HGNC Symbol;Acc:16746]	MBNL2	protein_coding	4.46325	7.57228	8.59357	5.35473	7.94366	4.26691	7.99407	4.92338	11.235	0.00080271	0.025527
ENSG00000162852	consortin, connexin sorting protein [Source:HGNC Symbol;Acc:26486]	CNST	protein_coding	9.44028	5.38927	7.18682	1.40893	5.71733	0.64477	5.84715	1.10715	11.2208	0.000808875	0.025527
ENSG00000110619	cysteinyl-tRNA synthetase [Source:HGNC Symbol;Acc:1493]	CARS	protein_coding	4.96688	6.08679	3.25254	5.06161	6.51526	2.37288	6.43822	4.29235	11.2169	0.000810539	0.025527
ENSG00000203778	family with sequence similarity 229, member B [Source:HGNC Symbol;Acc:33858]	FAM229B	protein_coding	-5.25973	3.81614	3.74057	4.67212	0.199187	5.74335	0.559695	5.30221	11.2155	0.000811166	0.025527
ENSG00000107185	RGP1 retrograde golgi transport homolog (S. cerevisiae) [Source:HGNC Symbol;Acc:21965]	RGP1	protein_coding	-4.77696	3.05796	1.41864	3.5112	0.817397	4.80486	0.833326	4.30402	11.18	0.000826855	0.0258991
ENSG00000119547	one cut homeobox 2 [Source:HGNC Symbol;Acc:8139]	ONECUT2	protein_coding	-6.88795	7.38391	1.41864	8.04005	2.18535	9.23637	2.16263	8.76362	11.1578	0.000836808	0.0260889
ENSG00000108176	DnaJ (Hsp40) homolog, subfamily C, member 12 [Source:HGNC Symbol;Acc:28908]	DNAJC12	protein_coding	4.67557	3.4082	4.22599	0.353986	3.90948	1.42607	3.92127	0.93813	11.1329	0.000848087	0.0263182
ENSG00000233183		RP3-468B3.2	lincRNA	-4.57127	4.39909	1.41864	6.46289	1.40271	6.06106	1.39904	6.27168	11.1114	0.000857985	0.0265026
ENSG00000099308	microtubule associated serine/threonine kinase 3 [Source:HGNC Symbol;Acc:19036]	MAST3	protein_coding	6.52164	7.92132	12.4806	5.3513	6.83614	1.55074	8.90255	4.37661	11.1	0.000863291	0.0265442
ENSG00000106992	adenylate kinase 1 [Source:HGNC Symbol;Acc:361]	AK1	protein_coding	-3.45301	4.35282	2.71142	5.47205	1.83113	5.89914	1.86453	5.70073	10.8811	0.000971493	0.0297348
ENSG00000148200	nuclear receptor subfamily 6, group A, member 1 [Source:HGNC Symbol;Acc:7985]	NR6A1	protein_coding	-2.99719	4.98492	5.80648	4.8005	2.32144	7.11922	2.75613	6.32173	10.7821	0.00102484	0.0312249
ENSG00000114353	guanine nucleotide binding protein (G protein), alpha inhibiting activity polypeptide 2 [Source:HGNC Symbol;Acc:4385]	GNAI2	protein_coding	-3.65824	5.15207	4.25658	5.94457	2.3471	7.02137	2.46434	6.57498	10.7567	0.001039	0.0315131
ENSG00000169715	metallothionein 1E [Source:HGNC Symbol;Acc:7397]	MT1E	protein_coding	5.98816	8.38611	5.22599	6.18925	8.7206	3.69397	8.63358	5.47719	10.7054	0.00106823	0.0322537
ENSG00000001461	NIPA-like domain containing 3 [Source:HGNC Symbol;Acc:25233]	NIPAL3	protein_coding	6.95651	5.86181	1.41864	6.11837	6.02484	1.07921	5.94524	5.25763	10.689	0.00107773	0.0323948
ENSG00000167658	eukaryotic translation elongation factor 2 [Source:HGNC Symbol;Acc:3214]	EEF2	protein_coding	3.43631	7.59984	4.81096	5.41478	8.02152	5.12315	7.93804	5.28363	10.6198	0.00111884	0.0334802
ENSG00000205758	crystallin, zeta (quinone reductase)-like 1 [Source:HGNC Symbol;Acc:2420]	CRYZL1	protein_coding	-2.39403	6.564	7.03556	6.13064	4.39604	8.64683	4.7279	7.88929	10.5658	0.00115198	0.0343187
ENSG00000010270	STARD3 N-terminal like [Source:HGNC Symbol;Acc:19169]	STARD3NL	protein_coding	9.36237	5.6259	3.58856	5.30355	5.9374	0.64477	5.87205	4.496	10.5218	0.00117972	0.0349896
ENSG00000145819	Rho GTPase activating protein 26 [Source:HGNC Symbol;Acc:17073]	ARHGAP26	protein_coding	-2.36636	4.9605	4.61241	4.95162	3.25957	6.73934	3.34182	6.10723	10.4993	0.00119422	0.0352638
ENSG00000169856	one cut homeobox 1 [Source:HGNC Symbol;Acc:8138]	ONECUT1	protein_coding	-4.17464	3.92504	1.41864	6.11285	-0.0931393	1.3014	-0.0292957	5.16993	10.4842	0.00120397	0.0353956
ENSG00000197021	chromosome X open reading frame 40B [Source:HGNC Symbol;Acc:17402]	CXorf40B	protein_coding	8.4725	4.4832	1.41864	0.353986	5.15829	0.64477	5.08603	0.492064	10.4731	0.00121129	0.0354552
ENSG00000160688	flavin adenine dinucleotide synthetase 1 [Source:HGNC Symbol;Acc:24671]	FLAD1	protein_coding	-3.10239	6.26937	5.26363	6.70369	3.96226	7.72991	4.04823	7.31787	10.4474	0.00122824	0.0357952
ENSG00000104450	sperm associated antigen 1 [Source:HGNC Symbol;Acc:11212]	SPAG1	protein_coding	-6.02509	4.562	1.41864	6.21572	0.53625	5.55299	0.564571	5.96131	10.3462	0.00129741	0.0376474
ENSG00000132256	tripartite motif containing 5 [Source:HGNC Symbol;Acc:16276]	TRIM5	protein_coding	-4.24887	7.01373	1.41864	8.18334	4.15587	8.29821	4.10057	8.24176	10.315	0.00131952	0.0381238
ENSG00000106077	abhydrolase domain containing 11 [Source:HGNC Symbol;Acc:16407]	ABHD11	protein_coding	-2.80967	4.83864	2.79715	4.85368	3.18642	6.55657	3.17089	5.9406	10.2706	0.00135166	0.038736
ENSG00000240038	amylase, alpha 2B (pancreatic) [Source:HGNC Symbol;Acc:478]	AMY2B	protein_coding	4.35274	7.48703	3.41864	4.23076	7.96114	4.47903	7.87134	4.36039	10.2637	0.00135676	0.038736
ENSG00000235531	Protein LOC100132891; cDNA FLJ53548 [Source:UniProtKB/TrEMBL;Acc:B7Z945]	RP11-383H13.1	protein_coding	9.16081	5.12104	1.41864	0.353986	5.50631	0.64477	5.43343	0.492064	10.2619	0.00135804	0.038736
ENSG00000033030	zinc finger, CCHC domain containing 8 [Source:HGNC Symbol;Acc:25265]	ZCCHC8	protein_coding	-2.54968	5.61026	3.99516	6.39232	3.98864	6.86726	3.98612	6.65155	10.2527	0.00136488	0.0387662
ENSG00000012983	mitogen-activated protein kinase kinase kinase kinase 5 [Source:HGNC Symbol;Acc:6867]	MAP4K5	protein_coding	-4.01763	5.90827	1.91944	6.52824	3.60559	8.01138	3.56134	7.44396	10.2232	0.00138682	0.0392231
ENSG00000147459	dedicator of cytokinesis 5 [Source:HGNC Symbol;Acc:23476]	DOCK5	protein_coding	-2.42674	7.61557	6.44942	7.27106	6.00498	9.42899	6.0328	8.72084	10.2129	0.00139461	0.0392756
ENSG00000111912	nuclear receptor coactivator 7 [Source:HGNC Symbol;Acc:21081]	NCOA7	protein_coding	-4.31965	7.6244	1.41864	8.88445	4.91436	9.27655	4.84805	9.09462	10.2053	0.0014004	0.0392756
ENSG00000169116	prostate androgen-regulated mucin-like protein 1 [Source:HGNC Symbol;Acc:24536]	PARM1	protein_coding	5.99499	7.13557	1.41864	0.353986	7.79308	2.66241	7.7009	1.84369	10.1617	0.00143392	0.0400456
ENSG00000172915	neurobeachin [Source:HGNC Symbol;Acc:7648]	NBEA	protein_coding	10.5416	6.69027	8.09107	5.75802	7.2843	0.64477	7.35198	4.80692	10.1541	0.0014398	0.0400456
ENSG00000118946	protocadherin 17 [Source:HGNC Symbol;Acc:14267]	PCDH17	protein_coding	-6.38217	3.61298	1.41864	6.13627	-0.0429601	3.93816	0.01749	5.44307	10.1355	0.00145438	0.040284
ENSG00000189325	chromosome 6 open reading frame 222 [Source:HGNC Symbol;Acc:33769]	C6orf222	protein_coding	9.29747	5.10404	3.22599	0.353986	5.95642	0.64477	5.88694	0.492064	10.0849	0.00149486	0.0409645
ENSG00000021574	spastin [Source:HGNC Symbol;Acc:11233]	SPAST	protein_coding	-2.14465	5.23151	4.89567	5.83921	3.68374	6.87302	3.75425	6.44219	10.083	0.00149646	0.0409645
ENSG00000237248	long intergenic non-protein coding RNA 987 [Source:HGNC Symbol;Acc:48911]	LINC00987	lincRNA	2.52516	4.21305	8.65948	2.83515	2.86378	2.65952	4.67923	2.75414	10.082	0.00149728	0.0409645
ENSG00000168214	recombination signal binding protein for immunoglobulin kappa J region [Source:HGNC Symbol;Acc:5724]	RBPJ	protein_coding	4.52581	6.91355	9.19013	5.28863	7.30457	3.65804	7.52775	4.71724	10.0708	0.00150637	0.0410455
ENSG00000182199	serine hydroxymethyltransferase 2 (mitochondrial) [Source:HGNC Symbol;Acc:10852]	SHMT2	protein_coding	10.2807	6.26405	1.41864	2.53011	6.73157	0.64477	6.64716	1.97901	10.0478	0.00152534	0.0411695
ENSG00000172432	GTP binding protein 2 [Source:HGNC Symbol;Acc:4670]	GTPBP2	protein_coding	9.76353	5.76502	1.41864	1.45577	6.1062	0.64477	6.02667	1.13616	10.0435	0.00152884	0.0411695
ENSG00000166821	peroxisomal biogenesis factor 11 alpha [Source:HGNC Symbol;Acc:8852]	PEX11A	protein_coding	6.02564	6.63162	2.23422	4.84505	7.14507	2.17983	7.05789	4.16424	10.0429	0.00152934	0.0411695
ENSG00000085998	protein O-linked mannose N-acetylglucosaminyltransferase 1 (beta 1,2-) [Source:HGNC Symbol;Acc:19139]	POMGNT1	protein_coding	-2.23978	5.09634	5.13343	4.99718	3.38927	6.93116	3.51353	6.2921	10.0074	0.00155911	0.0418028
ENSG00000170471	Ral GTPase activating protein, beta subunit (non-catalytic) [Source:HGNC Symbol;Acc:29221]	RALGAPB	protein_coding	-6.32398	6.35362	1.41864	7.84202	1.99387	8.43898	1.97569	8.16913	9.93354	0.00162294	0.043341
ENSG00000142677	interleukin 22 receptor, alpha 1 [Source:HGNC Symbol;Acc:13700]	IL22RA1	protein_coding	7.30938	3.42452	1.41864	0.353986	4.11579	0.64477	4.061	0.492064	9.80967	0.00173596	0.0459235
ENSG00000119778	ATPase family, AAA domain containing 2B [Source:HGNC Symbol;Acc:29230]	ATAD2B	protein_coding	-2.97288	5.48085	2.5692	3.26797	3.61897	7.76267	3.58657	6.82317	9.80827	0.00173729	0.0459235
ENSG00000153827	thyroid hormone receptor interactor 12 [Source:HGNC Symbol;Acc:12306]	TRIP12	protein_coding	3.57598	7.49177	11.294	7.37552	6.85042	4.13666	8.05728	6.53856	9.80519	0.0017402	0.0459235
ENSG00000214548	maternally expressed 3 (non-protein coding) [Source:HGNC Symbol;Acc:14575]	MEG3	lincRNA	3.60511	5.76647	8.80424	3.48768	5.74252	3.80634	6.25733	3.65615	9.79791	0.0017471	0.0459248
ENSG00000106686	spermatogenesis associated 6-like [Source:HGNC Symbol;Acc:25472]	SPATA6L	protein_coding	-3.18467	5.22235	1.41864	4.41078	3.4813	7.67686	3.43626	6.81182	9.77862	0.00176553	0.0462279
ENSG00000161921	chemokine (C-X-C motif) ligand 16 [Source:HGNC Symbol;Acc:16642]	CXCL16	protein_coding	-3.46039	6.28908	2.8649	8.05498	3.49152	6.78256	3.46897	7.55578	9.6511	0.00189238	0.0491564
ENSG00000166452	A kinase (PRKA) interacting protein 1 [Source:HGNC Symbol;Acc:1170]	AKIP1	protein_coding	-2.16949	5.00605	4.72607	5.10377	3.44521	6.86176	3.52051	6.25475	9.64329	0.00190044	0.0491564
ENSG00000096060	FK506 binding protein 5 [Source:HGNC Symbol;Acc:3721]	FKBP5	protein_coding	-2.69929	3.58892	2.83818	3.3888	1.84811	5.87786	1.88784	5.06823	9.64259	0.00190117	0.0491564
ENSG00000125144	metallothionein 1G [Source:HGNC Symbol;Acc:7399]	MT1G	protein_coding	10.267	7.37043	1.41864	3.72651	7.77589	0.748291	7.68408	3.05161	9.63725	0.00190671	0.0491564
ENSG00000116001	TIA1 cytotoxic granule-associated RNA binding protein [Source:HGNC Symbol;Acc:11802]	TIA1	protein_coding	-3.51604	7.25115	2.0036	8.13934	5.32628	9.09107	5.25711	8.69118	9.62289	0.00192167	0.0491669
ENSG00000172340	succinate-CoA ligase, GDP-forming, beta subunit [Source:HGNC Symbol;Acc:11450]	SUCLG2	protein_coding	-4.80564	5.9113	1.41864	5.0487	2.93492	7.74745	2.89825	6.97282	9.62278	0.00192179	0.0491669
ENSG00000106484	mesoderm specific transcript [Source:HGNC Symbol;Acc:7028]	MEST	protein_coding	8.50289	4.99511	7.9578	4.29753	4.91101	0.64477	5.36544	3.56903	9.51302	0.00204019	0.0519978
ENSG00000149823	vacuolar protein sorting 51 homolog (S. cerevisiae) [Source:HGNC Symbol;Acc:1172]	VPS51	protein_coding	6.96842	5.0228	1.41864	0.353986	5.5597	0.893519	5.48682	0.624321	9.47353	0.00208457	0.0529276
ENSG00000138161	CUB and zona pellucida-like domains 1 [Source:HGNC Symbol;Acc:17937]	CUZD1	protein_coding	12.2865	8.18875	6.0625	4.82883	8.49385	0.64477	8.41685	3.95799	9.41137	0.00215644	0.0545457
ENSG00000244067	glutathione S-transferase alpha 2 [Source:HGNC Symbol;Acc:4627]	GSTA2	protein_coding	6.51815	4.28595	1.41864	0.353986	4.71202	0.866051	4.65088	0.609617	9.33787	0.00224467	0.0565639
ENSG00000182621	phospholipase C, beta 1 (phosphoinositide-specific) [Source:HGNC Symbol;Acc:15917]	PLCB1	protein_coding	6.61505	4.59707	2.41864	0.440661	5.21907	0.982457	5.15573	0.712667	9.32058	0.00226594	0.0567234
ENSG00000151883	poly (ADP-ribose) polymerase family, member 8 [Source:HGNC Symbol;Acc:26124]	PARP8	protein_coding	-4.72329	4.69396	1.41864	3.0993	1.85865	6.90025	1.84294	6.01252	9.31898	0.00226792	0.0567234
ENSG00000121390	paraspeckle component 1 [Source:HGNC Symbol;Acc:20320]	PSPC1	protein_coding	6.78186	3.18654	1.41864	2.11112	3.48706	0.64477	3.44224	1.58397	9.30851	0.00228092	0.0568246
ENSG00000136143	succinate-CoA ligase, ADP-forming, beta subunit [Source:HGNC Symbol;Acc:11448]	SUCLA2	protein_coding	-6.07079	5.35313	1.41864	5.24473	1.37759	7.5982	1.37459	6.88892	9.30209	0.00228892	0.0568246
ENSG00000196935	SLIT-ROBO Rho GTPase activating protein 1 [Source:HGNC Symbol;Acc:17382]	SRGAP1	protein_coding	-3.29267	5.77303	3.1213	4.96618	3.87215	7.75579	3.84541	6.97475	9.28122	0.00231516	0.0572638
ENSG00000087338	germ cell-less, spermatogenesis associated 1 [Source:HGNC Symbol;Acc:23843]	GMCL1	protein_coding	-3.83897	4.82953	1.41864	6.59197	2.29318	6.43285	2.26805	6.51278	9.2742	0.00232405	0.0572724
ENSG00000204147	N-acylsphingosine amidohydrolase (non-lysosomal ceramidase) 2B [Source:HGNC Symbol;Acc:23456]	ASAH2B	protein_coding	-5.14447	5.71416	1.41864	2.17505	2.33501	7.63298	2.30974	6.677	9.26355	0.0023376	0.0572882
ENSG00000077157	protein phosphatase 1, regulatory subunit 12B [Source:HGNC Symbol;Acc:7619]	PPP1R12B	protein_coding	-3.26849	6.27632	4.98485	3.71868	3.56003	8.62451	3.64803	7.67101	9.26027	0.00234178	0.0572882
ENSG00000095951	human immunodeficiency virus type I enhancer binding protein 1 [Source:HGNC Symbol;Acc:4920]	HIVEP1	protein_coding	3.6645	2.97814	4.59735	2.55016	3.13477	1.13955	3.22249	2.03742	9.2384	0.00236992	0.0577657
ENSG00000162896	polymeric immunoglobulin receptor [Source:HGNC Symbol;Acc:8968]	PIGR	protein_coding	-5.92129	9.83132	10.9017	6.86984	4.02807	11.7467	7.01748	10.7955	9.21796	0.00239653	0.0582027
ENSG00000182899	ribosomal protein L35a [Source:HGNC Symbol;Acc:10345]	RPL35A	protein_coding	2.31301	8.68948	10.6414	7.14297	8.80654	7.59536	9.02804	7.38495	9.20927	0.00240793	0.0582684
ENSG00000120509	PDZ domain containing 11 [Source:HGNC Symbol;Acc:28034]	PDZD11	protein_coding	9.17566	6.15595	1.41864	7.2405	5.80961	0.64477	5.73131	6.30756	9.15335	0.00248263	0.0598601
ENSG00000101871	midline 1 (Opitz/BBB syndrome) [Source:HGNC Symbol;Acc:7095]	MID1	protein_coding	-6.46572	4.98986	1.41864	6.46303	0.817781	6.41516	0.833641	6.43918	9.0815	0.00258208	0.0619678
ENSG00000011376	leucyl-tRNA synthetase 2, mitochondrial [Source:HGNC Symbol;Acc:17095]	LARS2	protein_coding	-5.63209	2.96257	1.41864	5.08552	0.102496	3.59974	0.153831	4.57456	9.07693	0.00258854	0.0619678
ENSG00000124098	family with sequence similarity 210, member B [Source:HGNC Symbol;Acc:16102]	FAM210B	protein_coding	-2.87796	3.88182	2.71436	5.0752	1.90842	5.41951	1.93751	5.24987	9.0489	0.00262852	0.062701
ENSG00000164305	caspase 3, apoptosis-related cysteine peptidase [Source:HGNC Symbol;Acc:1504]	CASP3	protein_coding	7.62471	5.14686	8.09812	4.65952	5.22232	0.760049	5.6385	3.83335	9.00885	0.00268675	0.0638628
ENSG00000156875	hippocampus abundant transcript 1 [Source:HGNC Symbol;Acc:23363]	HIAT1	protein_coding	8.57555	4.73889	1.41864	3.52433	4.99499	0.64477	4.92969	2.74588	8.98122	0.00272769	0.0645863
ENSG00000104643	myotubularin related protein 9 [Source:HGNC Symbol;Acc:14596]	MTMR9	protein_coding	-2.98613	5.63072	4.16388	7.42193	3.28945	7.47306	3.33235	7.44751	8.97535	0.00273646	0.0645863
ENSG00000133256	phosphodiesterase 6B, cGMP-specific, rod, beta [Source:HGNC Symbol;Acc:8786]	PDE6B	protein_coding	-2.37826	3.02301	3.71289	4.70694	0.926604	3.8997	1.14685	4.38919	8.96204	0.00275648	0.0648304
ENSG00000151748	salvador homolog 1 (Drosophila) [Source:HGNC Symbol;Acc:17795]	SAV1	protein_coding	5.74641	5.2181	2.35221	5.64574	5.55508	1.28024	5.48574	4.80509	8.91969	0.00282112	0.0661188
ENSG00000171747	lectin, galactoside-binding, soluble, 4 [Source:HGNC Symbol;Acc:6565]	LGALS4	protein_coding	-4.00701	6.45156	2.63276	5.06569	3.73163	8.63873	3.69763	7.74955	8.87103	0.00289731	0.0673221
ENSG00000109084	transmembrane protein 97 [Source:HGNC Symbol;Acc:28106]	TMEM97	protein_coding	6.98324	5.17462	4.2495	2.29683	5.80193	0.987876	5.74858	1.81257	8.86505	0.00290683	0.0673221
ENSG00000163817	solute carrier family 6 (proline IMINO transporter), member 20 [Source:HGNC Symbol;Acc:30927]	SLC6A20	protein_coding	-3.92957	3.83984	2.90921	6.01416	0.490825	4.5056	0.649892	5.43284	8.86479	0.00290723	0.0673221
ENSG00000213366	glutathione S-transferase mu 2 (muscle) [Source:HGNC Symbol;Acc:4634]	GSTM2	protein_coding	-3.93315	4.16727	2.0036	5.82036	1.52716	5.29357	1.53933	5.61042	8.85613	0.00292107	0.0673221
ENSG00000184220	cms1 ribosomal small subunit homolog (yeast) [Source:HGNC Symbol;Acc:28666]	CMSS1	protein_coding	-2.44067	4.46779	1.41864	3.29263	3.39572	6.34283	3.35202	5.51912	8.85512	0.00292268	0.0673221
ENSG00000119777	transmembrane protein 214 [Source:HGNC Symbol;Acc:25983]	TMEM214	protein_coding	9.04068	5.09402	6.2	3.02154	5.33778	0.64477	5.39463	2.38432	8.81177	0.00299294	0.0687043
ENSG00000168397	autophagy related 4B, cysteine peptidase [Source:HGNC Symbol;Acc:20790]	ATG4B	protein_coding	-6.23225	4.90943	1.41864	5.48829	0.760344	6.58887	0.778883	6.16186	8.78482	0.00303747	0.069308
ENSG00000197070	arrestin domain containing 1 [Source:HGNC Symbol;Acc:28633]	ARRDC1	protein_coding	-6.24836	2.69049	1.41864	3.71645	0.0528357	4.78594	0.107108	4.29586	8.78335	0.00303992	0.069308
ENSG00000103544	chromosome 16 open reading frame 62 [Source:HGNC Symbol;Acc:24641]	C16orf62	protein_coding	-2.31357	5.35972	4.01796	5.16188	4.12665	7.14221	4.11968	6.46186	8.77711	0.00305034	0.06931
ENSG00000170802	forkhead box N2 [Source:HGNC Symbol;Acc:5281]	FOXN2	protein_coding	7.05496	4.85882	2.41864	5.5502	4.86634	0.759341	4.80755	4.66385	8.75121	0.00309397	0.0697717
ENSG00000171346	keratin 15 [Source:HGNC Symbol;Acc:6421]	KRT15	protein_coding	-2.67996	4.39984	4.60846	5.26337	2.2236	5.693	2.41245	5.49256	8.74874	0.00309815	0.0697717
ENSG00000206503	major histocompatibility complex, class I, A [Source:HGNC Symbol;Acc:4931]	HLA-A	protein_coding	-2.52132	8.06407	2.0036	7.80052	6.93666	9.90822	6.85134	9.20684	8.74655	0.00310189	0.0697717
ENSG00000163029	structural maintenance of chromosomes 6 [Source:HGNC Symbol;Acc:20466]	SMC6	protein_coding	4.14922	6.84195	11.3743	2.76586	5.68455	3.92471	7.76312	3.45611	8.71919	0.00314878	0.0705895
ENSG00000167996	ferritin, heavy polypeptide 1 [Source:HGNC Symbol;Acc:3976]	FTH1	protein_coding	2.27377	11.0046	11.4761	9.32766	11.228	9.63079	11.2458	9.48695	8.66597	0.00324208	0.0721104
ENSG00000006114	synergin, gamma [Source:HGNC Symbol;Acc:557]	SYNRG	protein_coding	-2.4378	5.27573	3.23422	5.51208	3.92552	6.95133	3.90016	6.42742	8.66267	0.00324795	0.0721104
ENSG00000011566	mitogen-activated protein kinase kinase kinase kinase 3 [Source:HGNC Symbol;Acc:6865]	MAP4K3	protein_coding	-5.25857	4.43274	1.41864	6.71049	0.776635	5.47701	0.794392	6.21758	8.66214	0.00324889	0.0721104
ENSG00000152952	procollagen-lysine, 2-oxoglutarate 5-dioxygenase 2 [Source:HGNC Symbol;Acc:9082]	PLOD2	protein_coding	5.344	8.24885	3.22599	6.39886	8.76967	4.00633	8.6756	5.74086	8.64479	0.00327999	0.0725602
ENSG00000109572	chloride channel, voltage-sensitive 3 [Source:HGNC Symbol;Acc:2021]	CLCN3	protein_coding	3.827	7.31307	11.6196	5.79105	6.54169	4.36429	8.1617	5.23281	8.6032	0.00335573	0.0738219
ENSG00000021355	serpin peptidase inhibitor, clade B (ovalbumin), member 1 [Source:HGNC Symbol;Acc:3311]	SERPINB1	protein_coding	3.4499	9.53775	6.68898	8.02698	9.87077	6.99479	9.78408	7.60245	8.6014	0.00335904	0.0738219
ENSG00000145022	T-cell leukemia translocation altered [Source:HGNC Symbol;Acc:11692]	TCTA	protein_coding	-2.83592	4.85542	3.44544	2.95483	2.7104	7.12726	2.73881	6.22678	8.58657	0.00338651	0.0741823
ENSG00000065621	glutathione S-transferase omega 2 [Source:HGNC Symbol;Acc:23064]	GSTO2	protein_coding	7.32053	5.23772	1.41864	4.68995	5.57172	0.795131	5.49745	3.86369	8.57752	0.00340339	0.0743092
ENSG00000150712	myotubularin related protein 12 [Source:HGNC Symbol;Acc:18191]	MTMR12	protein_coding	-2.72173	4.97471	4.3541	5.99602	2.59255	6.05833	2.69707	6.02652	8.56373	0.00342926	0.074631
ENSG00000127324	tetraspanin 8 [Source:HGNC Symbol;Acc:11855]	TSPAN8	protein_coding	-5.97278	7.80166	1.41864	8.75624	3.16805	9.28293	3.12698	9.04278	8.53595	0.00348199	0.0755332
ENSG00000137941	tubulin tyrosine ligase-like family, member 7 [Source:HGNC Symbol;Acc:26242]	TTLL7	protein_coding	-2.58491	4.77519	3.45602	6.72504	2.70665	6.04519	2.73758	6.41538	8.5052	0.00354133	0.0765727
ENSG00000145287	placenta-specific 8 [Source:HGNC Symbol;Acc:19254]	PLAC8	protein_coding	-2.67345	3.42115	2.05091	2.65872	1.88244	5.73202	1.88394	4.86035	8.48389	0.00358305	0.0770254
ENSG00000120992	lysophospholipase I [Source:HGNC Symbol;Acc:6737]	LYPLA1	protein_coding	4.76398	6.25393	2.03217	5.68074	6.67893	2.69286	6.59619	4.86211	8.48277	0.00358525	0.0770254
ENSG00000124788	ataxin 1 [Source:HGNC Symbol;Acc:10548]	ATXN1	protein_coding	4.24609	7.03785	10.5973	3.03022	6.76915	4.85906	7.63308	4.24348	8.4033	0.00374541	0.0799683
ENSG00000178860	musculin [Source:HGNC Symbol;Acc:7321]	MSC	protein_coding	8.48155	4.4409	1.41864	0.353986	4.94168	0.64477	4.87695	0.492064	8.40048	0.00375122	0.0799683
ENSG00000142197	dopey family member 2 [Source:HGNC Symbol;Acc:1291]	DOPEY2	protein_coding	-2.94514	4.62943	3.47522	4.89298	2.61972	6.45192	2.65487	5.86117	8.39719	0.00375802	0.0799683
ENSG00000181523	N-sulfoglucosamine sulfohydrolase [Source:HGNC Symbol;Acc:10818]	SGSH	protein_coding	3.21569	3.81284	4.72461	1.71401	4.0781	2.33374	4.10927	2.04377	8.37905	0.0037957	0.0804409
ENSG00000251136		RP11-37B2.1	lincRNA	-4.33691	5.52942	6.03658	3.30603	1.52248	7.97131	2.28148	6.93154	8.36753	0.00381984	0.0804409
ENSG00000170962	platelet derived growth factor D [Source:HGNC Symbol;Acc:30620]	PDGFD	protein_coding	-6.4663	5.31468	1.41864	8.28277	0.190844	5.09398	0.236981	7.40523	8.36666	0.00382167	0.0804409
ENSG00000135842	family with sequence similarity 129, member A [Source:HGNC Symbol;Acc:16784]	FAM129A	protein_coding	5.59076	5.36644	1.41864	1.21051	6.07236	1.64825	5.9925	1.43003	8.36199	0.0038315	0.0804409
ENSG00000144048	dual specificity phosphatase 11 (RNA/RNP complex 1-interacting) [Source:HGNC Symbol;Acc:3066]	DUSP11	protein_coding	4.87409	5.53214	2.82463	5.23025	5.84008	2.10934	5.7684	4.4975	8.35786	0.00384023	0.0804409
ENSG00000132522	G protein pathway suppressor 2 [Source:HGNC Symbol;Acc:4550]	GPS2	protein_coding	4.60512	5.60658	6.06451	4.37749	5.92004	2.39144	5.92703	3.69826	8.34822	0.00386065	0.0806166
ENSG00000170365	SMAD family member 1 [Source:HGNC Symbol;Acc:6767]	SMAD1	protein_coding	-3.70692	5.33108	1.41864	6.93177	2.86942	6.718	2.83404	6.8264	8.33093	0.00389757	0.0811348
ENSG00000197302	zinc finger protein 720 [Source:HGNC Symbol;Acc:26987]	ZNF720	protein_coding	-3.87826	3.6487	1.41864	6.00057	0.546301	4.11563	0.574311	5.34457	8.32347	0.0039136	0.0812164
ENSG00000136504	K(lysine) acetyltransferase 7 [Source:HGNC Symbol;Acc:17016]	KAT7	protein_coding	5.72181	3.60483	3.22599	2.66246	3.95311	0.838013	3.92656	2.02402	8.30324	0.00395743	0.0818725
ENSG00000110723	exophilin 5 [Source:HGNC Symbol;Acc:30578]	EXPH5	protein_coding	-2.02598	5.56196	6.02567	5.73349	3.93105	7.42165	4.12272	6.81705	8.28233	0.00400327	0.082566
ENSG00000196968	fucosyltransferase 11 (alpha (1,3) fucosyltransferase) [Source:HGNC Symbol;Acc:19233]	FUT11	protein_coding	8.92646	5.025	1.41864	3.45356	5.63017	0.64477	5.55434	2.62115	8.27273	0.0040245	0.0827491
ENSG00000100342	apolipoprotein L, 1 [Source:HGNC Symbol;Acc:618]	APOL1	protein_coding	-2.53203	6.09189	4.7384	6.16066	4.33027	7.95275	4.34856	7.3327	8.24532	0.00408572	0.0837509
ENSG00000111716	lactate dehydrogenase B [Source:HGNC Symbol;Acc:6541]	LDHB	protein_coding	3.95984	7.0064	8.82803	0.353986	7.26626	6.30147	7.42833	5.25148	8.22905	0.00412252	0.0841397
ENSG00000213593	thioredoxin-related transmembrane protein 2 [Source:HGNC Symbol;Acc:30739]	TMX2	protein_coding	7.98098	5.78847	1.41864	4.58335	6.25025	0.866051	6.16729	3.7266	8.22585	0.00412979	0.0841397
ENSG00000039123	superkiller viralicidic activity 2-like 2 (S. cerevisiae) [Source:HGNC Symbol;Acc:18734]	SKIV2L2	protein_coding	-2.39552	6.79642	4.82191	4.96261	5.19307	8.58242	5.17443	7.7027	8.21309	0.00415893	0.0843879
ENSG00000143971	Ewing tumor-associated antigen 1 [Source:HGNC Symbol;Acc:24648]	ETAA1	protein_coding	-5.92357	5.08307	1.41864	8.14644	0.226396	4.31992	0.270348	7.21276	8.19976	0.0041896	0.0843879
ENSG00000179241	low density lipoprotein receptor class A domain containing 3 [Source:HGNC Symbol;Acc:27046]	LDLRAD3	protein_coding	-2.74279	4.00349	4.88069	4.52082	1.74022	5.57205	2.05148	5.16447	8.19929	0.00419069	0.0843879
ENSG00000183092	brain-enriched guanylate kinase-associated [Source:HGNC Symbol;Acc:24163]	BEGAIN	protein_coding	8.23954	4.20416	1.41864	0.353986	4.73083	0.64477	4.65134	0.492064	8.19858	0.00419233	0.0843879
ENSG00000254772	eukaryotic translation elongation factor 1 gamma [Source:HGNC Symbol;Acc:3213]	EEF1G	protein_coding	2.1887	10.2349	11.2092	8.4782	10.5589	9.35427	10.6122	8.97886	8.18663	0.00422001	0.0846909
ENSG00000152128	transmembrane protein 163 [Source:HGNC Symbol;Acc:25380]	TMEM163	protein_coding	7.9845	4.06236	1.41864	0.903748	4.48763	0.64477	4.42102	0.785406	8.16145	0.00427901	0.0853559
ENSG00000112297	absent in melanoma 1 [Source:HGNC Symbol;Acc:356]	AIM1	protein_coding	-3.41263	4.44847	4.74417	1.7367	1.44816	6.82584	1.78752	5.87871	8.16086	0.00428041	0.0853559
ENSG00000171109	mitofusin 1 [Source:HGNC Symbol;Acc:18262]	MFN1	protein_coding	-2.75497	6.37384	2.84087	6.35299	4.98304	8.3183	4.92374	7.5999	8.15623	0.00429135	0.0853559
ENSG00000104331	inositol monophosphatase domain containing 1 [Source:HGNC Symbol;Acc:26019]	IMPAD1	protein_coding	-2.88861	5.62963	3.05091	5.87763	4.00911	7.55153	3.97706	6.94794	8.14802	0.00431081	0.0854892
ENSG00000132386	serpin peptidase inhibitor, clade F (alpha-2 antiplasmin, pigment epithelium derived factor), member 1 [Source:HGNC Symbol;Acc:8824]	SERPINF1	protein_coding	3.46608	4.77325	5.67603	3.96184	5.09515	2.44115	5.12773	3.3848	8.09985	0.0044269	0.0874562
ENSG00000204628	guanine nucleotide binding protein (G protein), beta polypeptide 2-like 1 [Source:HGNC Symbol;Acc:4399]	GNB2L1	protein_coding	1.90196	10.4767	11.4331	9.19411	10.6598	9.74425	10.7258	9.49531	8.09609	0.00443609	0.0874562
ENSG00000124374	poly(A) binding protein interacting protein 2B [Source:HGNC Symbol;Acc:29200]	PAIP2B	protein_coding	10.7619	6.66765	1.41864	1.76882	7.09987	0.64477	7.0124	1.33858	8.07747	0.00448189	0.0878566
ENSG00000137154	ribosomal protein S6 [Source:HGNC Symbol;Acc:10429]	RPS6	protein_coding	2.25997	10.8428	9.73152	9.19444	11.1567	9.61039	11.0954	9.41662	8.07718	0.00448261	0.0878566
ENSG00000159461	autocrine motility factor receptor, E3 ubiquitin protein ligase [Source:HGNC Symbol;Acc:463]	AMFR	protein_coding	2.5968	6.67528	11.5154	6.00089	3.52642	3.01933	7.58539	5.2364	8.06871	0.00450361	0.0880108
ENSG00000108389	myotubularin related protein 4 [Source:HGNC Symbol;Acc:7452]	MTMR4	protein_coding	-4.81966	3.57471	1.41864	5.64755	0.503505	4.97084	0.533394	5.36297	8.03965	0.00457644	0.0890948
ENSG00000115761	nucleolar protein 10 [Source:HGNC Symbol;Acc:25862]	NOL10	protein_coding	8.03979	5.3027	1.41864	5.97088	5.64107	0.755588	5.56724	5.02974	8.036	0.00458567	0.0890948
ENSG00000124701	apolipoprotein B mRNA editing enzyme, catalytic polypeptide-like 2 [Source:HGNC Symbol;Acc:605]	APOBEC2	protein_coding	7.656	5.64662	9.74057	0.353986	5.12056	1.30608	6.34971	0.86932	8.01489	0.00463944	0.089879
ENSG00000142252	gem (nuclear organelle) associated protein 7 [Source:HGNC Symbol;Acc:20045]	GEMIN7	protein_coding	8.47588	4.82768	1.41864	5.24813	5.0208	0.64477	4.95478	4.4203	7.94836	0.00481309	0.0924877
ENSG00000088280	ArfGAP with SH3 domain, ankyrin repeat and PH domain 3 [Source:HGNC Symbol;Acc:14987]	ASAP3	protein_coding	-4.46845	2.87686	2.0036	4.32079	0.294133	3.43051	0.37483	3.94087	7.94521	0.00482148	0.0924877
ENSG00000248161		RP11-499E18.1	lincRNA	-1.92567	3.78982	3.538	4.74946	2.37509	4.82977	2.42979	4.7908	7.94407	0.00482452	0.0924877
ENSG00000117748	replication protein A2, 32kDa [Source:HGNC Symbol;Acc:10290]	RPA2	protein_coding	9.94088	6.12687	1.41864	6.20468	6.44826	0.64477	6.36508	5.23935	7.94228	0.00482929	0.0924877
ENSG00000062038	cadherin 3, type 1, P-cadherin (placental) [Source:HGNC Symbol;Acc:1762]	CDH3	protein_coding	-2.31774	4.29936	4.99939	5.12866	2.25415	5.83027	2.50865	5.52113	7.92969	0.00486302	0.0928685
ENSG00000153551	CKLF-like MARVEL transmembrane domain containing 7 [Source:HGNC Symbol;Acc:19178]	CMTM7	protein_coding	-4.91261	4.87645	1.41864	7.6827	0.622395	5.23583	0.646602	6.90869	7.90632	0.00492623	0.0934343
ENSG00000160588	myelin protein zero-like 3 [Source:HGNC Symbol;Acc:27279]	MPZL3	protein_coding	-2.8374	6.58578	5.4993	8.35749	3.99091	7.8151	4.09719	8.1133	7.90411	0.00493227	0.0934343
ENSG00000065457	adenosine deaminase, tRNA-specific 1 [Source:HGNC Symbol;Acc:228]	ADAT1	protein_coding	-3.79212	4.27225	2.76631	6.11875	0.234085	3.37338	0.405114	5.35528	7.9033	0.00493447	0.0934343
ENSG00000152270	phosphodiesterase 3B, cGMP-inhibited [Source:HGNC Symbol;Acc:8779]	PDE3B	protein_coding	-2.13024	3.66301	2.23831	4.56375	2.39522	5.15721	2.3864	4.88374	7.88682	0.00497962	0.0937926
ENSG00000128510	carboxypeptidase A4 [Source:HGNC Symbol;Acc:15740]	CPA4	protein_coding	5.94919	5.31733	3.79992	1.94411	6.2405	1.25292	6.17136	1.65553	7.88619	0.00498138	0.0937926
ENSG00000117318	inhibitor of DNA binding 3, dominant negative helix-loop-helix protein [Source:HGNC Symbol;Acc:5362]	ID3	protein_coding	8.69211	4.91863	1.41864	4.67289	5.14806	0.64477	5.08042	3.75285	7.87539	0.00501122	0.0938735
ENSG00000158195	WAS protein family, member 2 [Source:HGNC Symbol;Acc:12733]	WASF2	protein_coding	3.11642	6.17569	9.72014	3.80887	5.92412	4.49369	6.74259	4.19174	7.8745	0.00501369	0.0938735
ENSG00000064607	SURP and G patch domain containing 2 [Source:HGNC Symbol;Acc:18641]	SUGP2	protein_coding	-3.49905	3.92535	2.20524	5.87709	1.41821	5.48623	1.44454	5.69047	7.84492	0.00509637	0.0949916
ENSG00000119125	guanine deaminase [Source:HGNC Symbol;Acc:4212]	GDA	protein_coding	-3.03011	5.69942	4.15957	5.63731	3.4229	7.75513	3.46232	7.04796	7.84302	0.00510174	0.0949916
ENSG00000113594	leukemia inhibitory factor receptor alpha [Source:HGNC Symbol;Acc:6597]	LIFR	protein_coding	5.46644	3.47021	1.41864	1.86287	3.68708	0.886734	3.6379	1.48741	7.79934	0.00522652	0.0970454
ENSG00000184678	histone cluster 2, H2be [Source:HGNC Symbol;Acc:4760]	HIST2H2BE	protein_coding	-6.69597	4.27538	1.41864	6.26711	0.049797	3.97818	0.104166	5.60365	7.76602	0.00532383	0.098579
ENSG00000121716	paired immunoglobin-like type 2 receptor beta [Source:HGNC Symbol;Acc:18297]	PILRB	protein_coding	-2.34541	5.77975	6.47088	6.39035	3.7489	7.33587	4.05786	6.93713	7.73966	0.00540209	0.0994898
ENSG00000126814	tRNA methyltransferase 5 [Source:HGNC Symbol;Acc:23141]	TRMT5	protein_coding	5.54993	3.98298	3.12572	2.72382	4.46633	0.996536	4.42462	2.12834	7.73946	0.0054027	0.0994898
ENSG00000235884	long intergenic non-protein coding RNA 941 [Source:HGNC Symbol;Acc:48635]	LINC00941	lincRNA	-2.12017	4.84781	4.92008	3.29483	2.95542	6.85467	3.1003	6.00972	7.72408	0.0054489	0.0998134
ENSG00000109511	annexin A10 [Source:HGNC Symbol;Acc:534]	ANXA10	protein_coding	7.80867	6.8397	1.41864	0.353986	7.19	1.33954	7.10195	0.885231	7.71945	0.00546291	0.0998134
ENSG00000186908	zinc finger, DHHC-type containing 17 [Source:HGNC Symbol;Acc:18412]	ZDHHC17	protein_coding	-4.4094	5.60798	2.41864	4.15524	2.53933	8.02819	2.53184	7.10687	7.71878	0.00546495	0.0998134
ENSG00000171903	cytochrome P450, family 4, subfamily F, polypeptide 11 [Source:HGNC Symbol;Acc:13265]	CYP4F11	protein_coding	-6.53669	4.76799	1.41864	5.55206	0.656586	6.49798	0.679289	6.08748	7.71252	0.00548391	0.0998876
ENSG00000197857	zinc finger protein 44 [Source:HGNC Symbol;Acc:13110]	ZNF44	protein_coding	-4.01568	5.72863	2.01319	3.3599	3.06932	7.59664	3.03457	6.65756	7.68252	0.00557584	0.101287
ENSG00000169239	carbonic anhydrase VB, mitochondrial [Source:HGNC Symbol;Acc:1378]	CA5B	protein_coding	-2.36084	7.38709	6.34131	8.67021	4.59684	7.72619	4.75355	8.28558	7.67691	0.0055932	0.101316
ENSG00000124225	prostate transmembrane protein, androgen induced 1 [Source:HGNC Symbol;Acc:14107]	PMEPA1	protein_coding	-3.52899	7.11557	1.41864	8.57656	4.75272	8.555	4.69015	8.56578	7.67225	0.00560765	0.101316
ENSG00000135185	transmembrane protein 243, mitochondrial [Source:HGNC Symbol;Acc:21707]	TMEM243	protein_coding	5.1129	3.98609	3.58856	1.85675	4.25679	1.22835	4.23162	1.58334	7.65411	0.00566431	0.101764
ENSG00000100911	proteasome (prosome, macropain) activator subunit 2 (PA28 beta) [Source:HGNC Symbol;Acc:9569]	PSME2	protein_coding	-2.63103	8.42802	6.72242	8.84347	6.62062	9.74858	6.62587	9.36748	7.65224	0.00567018	0.101764
ENSG00000168743	nephronectin [Source:HGNC Symbol;Acc:27405]	NPNT	protein_coding	-5.6035	5.9176	1.41864	7.86528	1.66613	7.36479	1.65567	7.63735	7.64926	0.00567956	0.101764
ENSG00000225885	Uncharacterized protein [Source:UniProtKB/TrEMBL;Acc:E9PPA6]	AC023590.1	protein_coding	-1.98548	5.68137	5.98149	7.32963	3.92689	7.12589	4.11234	7.23151	7.64494	0.00569317	0.101764
ENSG00000115459	ELMO/CED-12 domain containing 3 [Source:HGNC Symbol;Acc:26158]	ELMOD3	protein_coding	2.6669	5.18305	9.20354	3.22095	4.41656	3.62351	5.7061	3.43173	7.63758	0.00571645	0.101845
ENSG00000203832	neuroblastoma breakpoint family, member 20 [Source:HGNC Symbol;Acc:32000]	NBPF20	protein_coding	8.09246	4.66683	1.41864	6.04488	4.56178	0.64477	4.50124	4.99734	7.63391	0.0057281	0.101845
ENSG00000141101	NIN1/RPN12 binding protein 1 homolog (S. cerevisiae) [Source:HGNC Symbol;Acc:29540]	NOB1	protein_coding	8.90189	5.40411	1.41864	6.16525	5.54564	0.64477	5.47224	5.31815	7.61913	0.00577522	0.102411
ENSG00000126522	argininosuccinate lyase [Source:HGNC Symbol;Acc:746]	ASL	protein_coding	8.68837	5.71427	1.41864	6.56212	5.09435	0.64477	5.02637	5.6355	7.6123	0.00579714	0.102528
ENSG00000182500	ORAI calcium release-activated calcium modulator 1 [Source:HGNC Symbol;Acc:25896]	ORAI1	protein_coding	-2.23923	3.75736	3.58856	3.89761	2.23383	5.39921	2.30064	4.77873	7.5995	0.00583844	0.102774
ENSG00000095319	nucleoporin 188kDa [Source:HGNC Symbol;Acc:17859]	NUP188	protein_coding	6.39582	5.41386	1.41864	6.69802	5.08731	0.913386	5.01852	5.7363	7.59849	0.00584172	0.102774
ENSG00000256683	zinc finger protein 350 [Source:HGNC Symbol;Acc:16656]	ZNF350	protein_coding	7.47657	5.56871	1.41864	0.804908	6.16428	1.00069	6.08473	0.896764	7.58997	0.0058694	0.102991
ENSG00000221995	TGFB1-induced anti-apoptotic factor 1 [Source:HGNC Symbol;Acc:11803]	TIAF1	protein_coding	3.28927	4.05049	7.74561	1.23539	3.8637	2.85199	4.56995	2.24336	7.58144	0.00589722	0.103209
ENSG00000130175	protein kinase C substrate 80K-H [Source:HGNC Symbol;Acc:9411]	PRKCSH	protein_coding	2.46946	4.20804	8.53238	3.51069	2.77836	2.51892	4.56799	3.11784	7.54636	0.00601313	0.104964
ENSG00000107099	dedicator of cytokinesis 8 [Source:HGNC Symbol;Acc:19191]	DOCK8	protein_coding	-2.37432	4.18165	2.59496	4.52567	3.01676	5.60808	3.0006	5.166	7.53446	0.00605297	0.10531
ENSG00000186575	neurofibromin 2 (merlin) [Source:HGNC Symbol;Acc:7773]	NF2	protein_coding	2.29416	7.57163	11.9311	6.60862	6.33781	5.77889	8.34042	6.27054	7.53106	0.00606442	0.10531
ENSG00000146574	CCZ1 vacuolar protein trafficking and biogenesis associated homolog B (S. cerevisiae) [Source:HGNC Symbol;Acc:21717]	CCZ1B	protein_coding	4.98211	3.76285	1.41864	2.74009	4.13273	1.05204	4.07825	2.18953	7.50945	0.00613761	0.106306
ENSG00000120334	centromere protein L [Source:HGNC Symbol;Acc:17879]	CENPL	protein_coding	-2.06861	5.78318	6.69141	5.34537	3.92319	7.75994	4.25117	6.95803	7.4993	0.0061723	0.106631
ENSG00000081177	exonuclease 3'-5' domain containing 2 [Source:HGNC Symbol;Acc:20217]	EXD2	protein_coding	7.00644	3.24346	1.41864	1.79916	3.82198	0.64477	3.77157	1.36339	7.4851	0.00622114	0.106733
ENSG00000172469	mannosidase, endo-alpha [Source:HGNC Symbol;Acc:21072]	MANEA	protein_coding	4.75516	4.83773	2.74057	0.353986	5.2152	2.12972	5.15463	1.42449	7.48378	0.00622573	0.106733
ENSG00000205808	phosphatidic acid phosphatase type 2 domain containing 2 [Source:HGNC Symbol;Acc:23682]	PPAPDC2	protein_coding	6.79703	3.91098	1.41864	0.353986	4.53548	0.764963	4.4706	0.554456	7.47952	0.00624046	0.106733
ENSG00000149577	SID1 transmembrane family, member 2 [Source:HGNC Symbol;Acc:24272]	SIDT2	protein_coding	2.87332	4.76761	6.75653	3.87719	4.71918	3.028	4.9161	3.53488	7.47912	0.00624186	0.106733
ENSG00000259529	E3 ubiquitin-protein ligase RNF31 [Source:UniProtKB/TrEMBL;Acc:H0YM83]	RP11-468E2.4	protein_coding	3.4127	4.19755	6.16038	3.70166	4.2261	2.25797	4.39612	3.1316	7.47226	0.00626568	0.106867
ENSG00000182544	major facilitator superfamily domain containing 5 [Source:HGNC Symbol;Acc:28156]	MFSD5	protein_coding	7.95458	4.01807	1.41864	1.36038	4.36808	0.64477	4.3106	1.07974	7.46348	0.00629632	0.107117
ENSG00000142937	ribosomal protein S8 [Source:HGNC Symbol;Acc:10441]	RPS8	protein_coding	1.73645	9.09403	9.24519	7.44445	9.37055	8.28281	9.36255	7.9232	7.45767	0.00631666	0.107191
ENSG00000170364	SET domain and mariner transposase fusion gene [Source:HGNC Symbol;Acc:10762]	SETMAR	protein_coding	3.54301	3.55026	6.32071	1.54471	3.6894	2.12817	3.98665	1.84529	7.42868	0.00641923	0.108484
ENSG00000142798	heparan sulfate proteoglycan 2 [Source:HGNC Symbol;Acc:5273]	HSPG2	protein_coding	-2.87977	4.44206	4.49332	2.10692	1.9295	6.8381	2.1297	5.88146	7.42702	0.00642518	0.108484
ENSG00000174799	centrosomal protein 135kDa [Source:HGNC Symbol;Acc:29086]	CEP135	protein_coding	-3.22656	6.36461	2.62027	5.47901	4.4744	8.61271	4.42698	7.73201	7.42184	0.00644369	0.108523
ENSG00000175772	long intergenic non-protein coding RNA 1106 [Source:HGNC Symbol;Acc:26769]	LINC01106	lincRNA	7.0411	3.13299	1.41864	0.353986	3.94513	0.64477	3.89325	0.492064	7.41121	0.00648188	0.108892
ENSG00000113924	homogentisate 1,2-dioxygenase [Source:HGNC Symbol;Acc:4892]	HGD	protein_coding	-5.59632	3.48999	2.74057	3.50533	0.105115	5.8282	0.288581	5.05163	7.38548	0.00657526	0.110001
ENSG00000148737	transcription factor 7-like 2 (T-cell specific, HMG-box) [Source:HGNC Symbol;Acc:11641]	TCF7L2	protein_coding	-3.31498	6.19461	1.41864	6.42599	4.35384	8.2334	4.29624	7.5896	7.38399	0.00658071	0.110001
ENSG00000183010	pyrroline-5-carboxylate reductase 1 [Source:HGNC Symbol;Acc:9721]	PYCR1	protein_coding	6.52389	2.7009	1.41864	0.353986	3.11777	0.64477	3.08029	0.492064	7.3608	0.0066661	0.111019
ENSG00000166181	apoptosis inhibitor 5 [Source:HGNC Symbol;Acc:594]	API5	protein_coding	-3.43236	6.5819	1.41864	6.22362	4.70472	8.74564	4.64252	7.94829	7.3513	0.00670143	0.111019
ENSG00000175287	phytanoyl-CoA dioxygenase domain containing 1 [Source:HGNC Symbol;Acc:23396]	PHYHD1	protein_coding	-1.89662	4.76143	5.4626	4.54405	3.16368	6.51408	3.36465	5.87219	7.35082	0.00670322	0.111019
ENSG00000153071	Dab, mitogen-responsive phosphoprotein, homolog 2 (Drosophila) [Source:HGNC Symbol;Acc:2662]	DAB2	protein_coding	-4.14382	4.13447	1.41864	5.37908	1.61943	5.70625	1.60979	5.54728	7.34959	0.00670782	0.111019
ENSG00000091947	transmembrane protein 101 [Source:HGNC Symbol;Acc:28653]	TMEM101	protein_coding	8.41751	5.48956	1.41864	1.91444	6.02053	0.762462	5.94156	1.47121	7.34051	0.00674177	0.111306
ENSG00000092847	argonaute RISC catalytic component 1 [Source:HGNC Symbol;Acc:3262]	AGO1	protein_coding	3.43491	7.74181	12.0033	6.46975	6.82416	4.89101	8.52583	5.92285	7.33115	0.00677696	0.111612
ENSG00000100129	eukaryotic translation initiation factor 3, subunit L [Source:HGNC Symbol;Acc:18138]	EIF3L	protein_coding	3.31601	8.92727	5.55409	7.31306	9.27745	6.41882	9.1881	6.93764	7.32229	0.00681044	0.111661
ENSG00000136872	aldolase B, fructose-bisphosphate [Source:HGNC Symbol;Acc:417]	ALDOB	protein_coding	8.3878	4.32622	1.41864	0.353986	4.75025	0.64477	4.68793	0.492064	7.32154	0.00681329	0.111661
ENSG00000170786	short chain dehydrogenase/reductase family 16C, member 5 [Source:HGNC Symbol;Acc:30311]	SDR16C5	protein_coding	8.51597	4.44435	1.41864	0.353986	4.96419	0.64477	4.89813	0.492064	7.30452	0.00687813	0.112449
ENSG00000011275	ring finger protein 216 [Source:HGNC Symbol;Acc:21698]	RNF216	protein_coding	-2.56797	5.31851	3.23626	5.29743	3.74051	7.21778	3.72077	6.57945	7.27752	0.0069823	0.113874
ENSG00000149212	sestrin 3 [Source:HGNC Symbol;Acc:23060]	SESN3	protein_coding	-4.72866	4.46904	2.0036	6.60895	0.926632	5.48376	0.966007	6.15945	7.22781	0.00717828	0.116575
ENSG00000143458	GA binding protein transcription factor, beta subunit 2 [Source:HGNC Symbol;Acc:28441]	GABPB2	protein_coding	-1.82744	6.77248	6.69253	6.18492	5.34513	8.4632	5.4569	7.74088	7.22671	0.00718267	0.116575
ENSG00000125845	bone morphogenetic protein 2 [Source:HGNC Symbol;Acc:1069]	BMP2	protein_coding	-4.40778	5.77079	1.41864	7.06632	2.92924	7.24532	2.89339	7.16017	7.22005	0.00720938	0.116726
ENSG00000197816	coiled-coil domain containing 180 [Source:HGNC Symbol;Acc:29303]	CCDC180	protein_coding	-2.17712	3.90306	1.41864	5.06651	2.72194	4.88897	2.68882	4.98159	7.21306	0.00723749	0.116899
ENSG00000130254	scaffold attachment factor B2 [Source:HGNC Symbol;Acc:21605]	SAFB2	protein_coding	-1.71411	4.14028	4.10682	3.66601	2.92967	5.83692	2.9915	5.09912	7.18474	0.00735262	0.118473
ENSG00000175155	yippee-like 2 (Drosophila) [Source:HGNC Symbol;Acc:18326]	YPEL2	protein_coding	7.58718	5.05705	4.0036	6.23643	5.28568	0.755588	5.24052	5.29284	7.17785	0.00738091	0.118643
ENSG00000072210	aldehyde dehydrogenase 3 family, member A2 [Source:HGNC Symbol;Acc:403]	ALDH3A2	protein_coding	-3.1558	5.02209	1.8516	6.26647	2.65623	6.13527	2.63175	6.20383	7.16399	0.00743815	0.11916
ENSG00000121940	chloride channel CLIC-like 1 [Source:HGNC Symbol;Acc:29675]	CLCC1	protein_coding	-2.56486	6.46157	4.08767	7.02398	4.99166	8.2256	4.95677	7.71656	7.16148	0.00744859	0.11916
ENSG00000186283	torsin family 3, member A [Source:HGNC Symbol;Acc:11997]	TOR3A	protein_coding	-3.33635	4.32225	2.04157	4.15151	2.32112	5.82396	2.3096	5.18017	7.14146	0.00753219	0.12021
ENSG00000187630	dehydrogenase/reductase (SDR family) member 4 like 2 [Source:HGNC Symbol;Acc:19731]	DHRS4L2	protein_coding	7.09923	3.17019	1.41864	0.353986	3.52791	0.64477	3.48349	0.492064	7.12812	0.00758844	0.12082
ENSG00000119431	haloacid dehalogenase-like hydrolase domain containing 3 [Source:HGNC Symbol;Acc:28171]	HDHD3	protein_coding	6.97875	4.46383	1.41864	4.40645	4.62509	0.734917	4.56387	3.56994	7.11894	0.00762737	0.121152
ENSG00000139687	retinoblastoma 1 [Source:HGNC Symbol;Acc:9884]	RB1	protein_coding	-3.58904	3.28474	1.41864	5.46571	0.636152	3.67165	0.659947	4.84667	7.10539	0.00768523	0.121783
ENSG00000143622	Ras-like without CAAX 1 [Source:HGNC Symbol;Acc:10023]	RIT1	protein_coding	-4.77551	3.24046	1.41864	5.05303	0.604335	4.76419	0.62955	4.9158	7.09782	0.00771776	0.12201
ENSG00000113282	clathrin interactor 1 [Source:HGNC Symbol;Acc:23186]	CLINT1	protein_coding	-2.35265	7.05332	2.41864	8.16173	5.74304	8.59795	5.67177	8.39692	7.04305	0.00795732	0.125234
ENSG00000157326	dehydrogenase/reductase (SDR family) member 4 [Source:HGNC Symbol;Acc:16985]	DHRS4	protein_coding	6.59718	2.74825	1.41864	0.353986	3.1203	0.64477	3.08084	0.492064	7.0399	0.00797137	0.125234
ENSG00000014919	cytochrome c oxidase assembly homolog 15 (yeast) [Source:HGNC Symbol;Acc:2263]	COX15	protein_coding	7.42178	5.5394	1.41864	5.86534	5.92882	0.828476	5.85081	4.87862	7.03279	0.00800308	0.125234
ENSG00000086548	carcinoembryonic antigen-related cell adhesion molecule 6 (non-specific cross reacting antigen) [Source:HGNC Symbol;Acc:1818]	CEACAM6	protein_coding	-4.69174	9.94326	1.41864	6.90091	7.18997	12.1655	7.10189	11.2037	7.0309	0.00801149	0.125234
ENSG00000003989	solute carrier family 7 (cationic amino acid transporter, y+ system), member 2 [Source:HGNC Symbol;Acc:11060]	SLC7A2	protein_coding	6.42456	6.99687	2.0036	2.48879	7.48502	2.23599	7.39505	2.38263	7.02976	0.0080166	0.125234
ENSG00000136279	drebrin-like [Source:HGNC Symbol;Acc:2696]	DBNL	protein_coding	4.53561	4.52577	1.41864	4.04309	4.91513	1.71011	4.84884	3.33686	7.02592	0.00803381	0.125234
ENSG00000149179	chromosome 11 open reading frame 49 [Source:HGNC Symbol;Acc:28720]	C11orf49	protein_coding	-2.88974	4.93386	2.74057	5.76666	3.23815	6.29405	3.21914	6.05798	6.99354	0.00818043	0.127217
ENSG00000205502	C2 calcium-dependent domain containing 4B [Source:HGNC Symbol;Acc:33628]	C2CD4B	protein_coding	6.39443	3.5329	1.41864	0.353986	3.86461	0.764963	3.80482	0.554456	6.98949	0.00819897	0.127217
ENSG00000138078	prolyl endopeptidase-like [Source:HGNC Symbol;Acc:30228]	PREPL	protein_coding	-2.85975	6.61117	4.60292	7.13267	4.61339	8.37114	4.61072	7.87848	6.97715	0.00825569	0.127801
ENSG00000204371	euchromatic histone-lysine N-methyltransferase 2 [Source:HGNC Symbol;Acc:14129]	EHMT2	protein_coding	-1.90295	4.63455	4.91625	6.07838	3.0354	6.1663	3.17169	6.12296	6.96988	0.00828932	0.128026
ENSG00000160145	kalirin, RhoGEF kinase [Source:HGNC Symbol;Acc:4814]	KALRN	protein_coding	9.52821	5.45615	1.41864	1.94467	5.79047	0.64477	5.7167	1.50191	6.95957	0.00833721	0.12847
ENSG00000149792	mitochondrial ribosomal protein L49 [Source:HGNC Symbol;Acc:1176]	MRPL49	protein_coding	4.08314	4.65225	6.77848	2.55092	5.08915	2.33223	5.24185	2.44493	6.94871	0.00838797	0.128564
ENSG00000122042	ubiquitin-like 3 [Source:HGNC Symbol;Acc:12504]	UBL3	protein_coding	-4.47211	6.63658	1.41864	3.96014	4.12569	8.67664	4.07093	7.72845	6.9466	0.00839785	0.128564
ENSG00000147604	ribosomal protein L7 [Source:HGNC Symbol;Acc:10363]	RPL7	protein_coding	1.68517	11.0727	11.2606	10.4586	11.2497	10.1588	11.2504	10.3165	6.94596	0.00840086	0.128564
ENSG00000167608	transmembrane channel-like 4 [Source:HGNC Symbol;Acc:22998]	TMC4	protein_coding	-2.68858	3.81712	1.41864	5.85844	1.66856	4.18396	1.65743	5.21723	6.92285	0.00851011	0.129939
ENSG00000204642	major histocompatibility complex, class I, F [Source:HGNC Symbol;Acc:4963]	HLA-F	protein_coding	-4.41369	4.99053	1.41864	6.31207	1.17828	5.40833	1.18138	5.91803	6.91238	0.00856011	0.130405
ENSG00000125149	chromosome 16 open reading frame 70 [Source:HGNC Symbol;Acc:29564]	C16orf70	protein_coding	-2.79757	4.82577	3.59656	3.95777	2.7909	6.83533	2.82458	6.06058	6.88741	0.00868047	0.131939
ENSG00000175104	TNF receptor-associated factor 6, E3 ubiquitin protein ligase [Source:HGNC Symbol;Acc:12036]	TRAF6	protein_coding	7.32055	6.23579	1.41864	5.89577	6.6212	1.16115	6.53601	5.00471	6.87094	0.00876086	0.13286
ENSG00000103995	centrosomal protein 152kDa [Source:HGNC Symbol;Acc:29298]	CEP152	protein_coding	5.69988	3.5732	1.41864	1.37018	3.99046	0.879414	3.93694	1.15593	6.86209	0.00880435	0.133205
ENSG00000136824	structural maintenance of chromosomes 2 [Source:HGNC Symbol;Acc:14011]	SMC2	protein_coding	4.46543	6.35222	10.8386	5.95483	5.00064	2.09307	7.13794	5.10609	6.85823	0.00882337	0.133205
ENSG00000165119	heterogeneous nuclear ribonucleoprotein K [Source:HGNC Symbol;Acc:5044]	HNRNPK	protein_coding	2.29634	6.45545	10.0036	5.97542	6.06341	5.06736	6.95343	5.60258	6.84029	0.00891243	0.134247
ENSG00000148175	stomatin [Source:HGNC Symbol;Acc:3383]	STOM	protein_coding	3.2905	7.7839	10.6607	7.21933	7.64014	5.26831	8.17485	6.55228	6.82743	0.00897685	0.134914
ENSG00000163378	EGF domain-specific O-linked N-acetylglucosamine (GlcNAc) transferase [Source:HGNC Symbol;Acc:28526]	EOGT	protein_coding	4.40869	5.56043	3.38581	3.49481	5.95169	2.53721	5.88531	3.11386	6.81738	0.00902748	0.135136
ENSG00000120314	WD repeat domain 55 [Source:HGNC Symbol;Acc:25971]	WDR55	protein_coding	2.64528	6.57432	5.08028	6.27341	6.9564	4.70386	6.89157	5.69993	6.8165	0.00903192	0.135136
ENSG00000159479	mediator complex subunit 8 [Source:HGNC Symbol;Acc:19971]	MED8	protein_coding	9.56564	5.93229	1.41864	7.24082	5.95001	0.64477	5.87343	6.21115	6.81126	0.00905849	0.135232
ENSG00000132424	PNN-interacting serine/arginine-rich protein [Source:HGNC Symbol;Acc:21222]	PNISR	protein_coding	-1.73271	7.89789	7.76737	8.26438	6.78084	9.42472	6.86217	8.95371	6.80383	0.00909627	0.135494
ENSG00000153317	ArfGAP with SH3 domain, ankyrin repeat and PH domain 1 [Source:HGNC Symbol;Acc:2720]	ASAP1	protein_coding	-5.34044	6.67536	1.41864	6.36692	3.42637	9.08262	3.3822	8.24142	6.7973	0.00912957	0.135688
ENSG00000184384	mastermind-like 2 (Drosophila) [Source:HGNC Symbol;Acc:16259]	MAML2	protein_coding	-5.35515	4.14509	1.41864	5.29434	1.00024	6.10676	1.00954	5.72898	6.78203	0.00920802	0.136552
ENSG00000178927	chromosome 17 open reading frame 62 [Source:HGNC Symbol;Acc:28672]	C17orf62	protein_coding	3.46076	5.36178	8.31073	5.68634	4.8618	2.22498	5.45092	4.86711	6.7762	0.00923815	0.136696
ENSG00000118322	ATPase, class V, type 10B [Source:HGNC Symbol;Acc:13543]	ATP10B	protein_coding	-2.24872	5.31247	5.54916	4.4802	3.47523	7.21943	3.6438	6.44763	6.77157	0.00926213	0.136749
ENSG00000167118	ubiquitin related modifier 1 [Source:HGNC Symbol;Acc:28378]	URM1	protein_coding	3.0464	4.22029	7.93434	1.15805	3.8742	3.41311	4.65658	2.59554	6.76545	0.00929395	0.136917
ENSG00000112531	QKI, KH domain containing, RNA binding [Source:HGNC Symbol;Acc:21100]	QKI	protein_coding	2.84032	6.72277	10.3655	6.73284	6.29118	4.63052	7.26171	6.0522	6.75489	0.00934912	0.137428
ENSG00000144895	eukaryotic translation initiation factor 2A, 65kDa [Source:HGNC Symbol;Acc:3254]	EIF2A	protein_coding	5.11949	6.46855	1.41864	8.13613	6.45497	2.21176	6.37126	7.15463	6.74404	0.00940612	0.137763
ENSG00000198730	CTR9, Paf1/RNA polymerase II complex component [Source:HGNC Symbol;Acc:16850]	CTR9	protein_coding	5.25406	5.38085	3.0036	6.19891	5.52429	1.54863	5.45799	5.30842	6.74273	0.00941303	0.137763
ENSG00000233927	ribosomal protein S28 [Source:HGNC Symbol;Acc:10418]	RPS28	protein_coding	1.72958	7.89516	8.09889	6.66949	8.04346	7.04378	8.04665	6.86403	6.7353	0.00945233	0.138037
ENSG00000068724	tetratricopeptide repeat domain 7A [Source:HGNC Symbol;Acc:19750]	TTC7A	protein_coding	4.78142	4.57127	5.62809	0.353986	5.25394	2.15121	5.27388	1.44385	6.71098	0.0095821	0.139444
ENSG00000189339	solute carrier family 35, member E2B [Source:HGNC Symbol;Acc:33941]	SLC35E2B	protein_coding	-2.34248	5.24925	5.20157	5.80326	3.31999	7.11699	3.46067	6.56472	6.70617	0.00960801	0.139444
ENSG00000112679	dual specificity phosphatase 22 [Source:HGNC Symbol;Acc:16077]	DUSP22	protein_coding	8.17615	4.77062	1.41864	5.43883	4.5851	0.64477	4.52323	4.60159	6.70338	0.00962301	0.139444
ENSG00000138002	intraflagellar transport 172 homolog (Chlamydomonas) [Source:HGNC Symbol;Acc:30391]	IFT172	protein_coding	-3.28991	5.53666	2.38211	6.28096	3.46342	6.71763	3.43094	6.51573	6.70068	0.00963762	0.139444
ENSG00000196182	serine/threonine kinase 40 [Source:HGNC Symbol;Acc:21373]	STK40	protein_coding	7.54108	4.06141	1.41864	4.24257	4.07074	0.64477	4.01591	3.44738	6.69789	0.00965272	0.139444
ENSG00000139641	extended synaptotagmin-like protein 1 [Source:HGNC Symbol;Acc:29534]	ESYT1	protein_coding	10.2208	6.26975	1.41864	6.00115	7.0588	0.64477	6.96162	5.07029	6.69074	0.0096915	0.139704
ENSG00000174243	DEAD (Asp-Glu-Ala-Asp) box polypeptide 23 [Source:HGNC Symbol;Acc:17347]	DDX23	protein_coding	8.66216	4.62477	1.41864	0.728688	5.31517	0.64477	5.24407	0.687423	6.67789	0.0097616	0.140412
ENSG00000134452	F-box protein, helicase, 18 [Source:HGNC Symbol;Acc:13620]	FBXO18	protein_coding	9.18312	6.6044	1.41864	7.67212	5.92674	0.668578	5.84914	6.69299	6.66567	0.00982875	0.141075
ENSG00000227057	WD repeat domain 46 [Source:HGNC Symbol;Acc:13923]	WDR46	protein_coding	9.00532	4.89316	3.41864	0.683009	5.30263	0.64477	5.24859	0.662689	6.64311	0.00995401	0.142568
ENSG00000179837	RNA binding motif protein 15B [Source:HGNC Symbol;Acc:24303]	RBM15B	protein_coding	8.47405	4.43859	1.41864	0.473073	4.84462	0.64477	4.78091	0.551818	6.63411	0.0100044	0.142984
ENSG00000188706	zinc finger, DHHC-type containing 9 [Source:HGNC Symbol;Acc:18475]	ZDHHC9	protein_coding	8.05796	4.22499	1.41864	3.88602	4.58347	0.64477	4.52378	3.16035	6.62993	0.0100279	0.143015
ENSG00000164117	F-box protein 8 [Source:HGNC Symbol;Acc:13587]	FBXO8	protein_coding	8.96611	5.13659	1.41864	5.27293	5.32422	0.64477	5.25533	4.37978	6.61893	0.01009	0.143302
ENSG00000164024	methionyl aminopeptidase 1 [Source:HGNC Symbol;Acc:15789]	METAP1	protein_coding	6.1004	4.78932	2.0036	4.36361	5.22412	1.12847	5.15864	3.54772	6.6188	0.0100908	0.143302
ENSG00000167258	cyclin-dependent kinase 12 [Source:HGNC Symbol;Acc:24224]	CDK12	protein_coding	-3.26662	5.35281	1.433	6.25734	3.64026	7.63465	3.59434	7.09861	6.59455	0.0102292	0.14496
ENSG00000100522	glucosamine-phosphate N-acetyltransferase 1 [Source:HGNC Symbol;Acc:19980]	GNPNAT1	protein_coding	3.94803	5.84249	4.02508	6.66403	5.88929	2.70313	5.83044	5.8114	6.57497	0.0103423	0.146243
ENSG00000143995	Meis homeobox 1 [Source:HGNC Symbol;Acc:7000]	MEIS1	protein_coding	-2.74568	8.04027	2.74057	8.53679	6.61708	9.74934	6.53508	9.26613	6.56782	0.0103839	0.146243
ENSG00000155093	protein tyrosine phosphatase, receptor type, N polypeptide 2 [Source:HGNC Symbol;Acc:9677]	PTPRN2	protein_coding	-4.99424	3.75417	1.41864	3.09685	1.10816	6.32194	1.11347	5.42595	6.56761	0.0103851	0.146243
ENSG00000178074	chromosome 2 open reading frame 69 [Source:HGNC Symbol;Acc:26799]	C2orf69	protein_coding	7.929	4.50714	1.41864	5.24342	4.30818	0.64477	4.25099	4.40598	6.55806	0.010441	0.146722
ENSG00000268416		CTD-2626G11.2	lincRNA	-3.331	5.7269	1.41864	6.404	3.81478	7.60639	3.76609	7.10486	6.54658	0.0105086	0.147362
ENSG00000059728	MAX dimerization protein 1 [Source:HGNC Symbol;Acc:6761]	MXD1	protein_coding	-5.18597	6.41217	1.41864	6.20039	3.20434	8.83375	3.16406	8.00183	6.53006	0.0106066	0.148426
ENSG00000102978	polymerase (RNA) II (DNA directed) polypeptide C, 33kDa [Source:HGNC Symbol;Acc:9189]	POLR2C	protein_coding	7.72618	4.852	1.41864	6.56718	4.14047	0.64477	4.08694	5.66108	6.48557	0.0108753	0.151776
ENSG00000128829	eukaryotic translation initiation factor 2 alpha kinase 4 [Source:HGNC Symbol;Acc:19687]	EIF2AK4	protein_coding	3.39829	5.05703	8.72242	4.08811	4.49746	2.7067	5.4312	3.62139	6.48297	0.0108913	0.151776
ENSG00000172493	AF4/FMR2 family, member 1 [Source:HGNC Symbol;Acc:7135]	AFF1	protein_coding	4.2669	6.01252	1.41864	3.20428	6.38846	2.95655	6.3063	3.08569	6.47433	0.0109443	0.152199
ENSG00000104714	glutamate-rich 1 [Source:HGNC Symbol;Acc:27234]	ERICH1	protein_coding	-4.13357	6.32536	1.41864	5.71039	3.83109	8.59195	3.78178	7.71948	6.47043	0.0109684	0.152218
ENSG00000180596	histone cluster 1, H2bc [Source:HGNC Symbol;Acc:4757]	HIST1H2BC	protein_coding	10.3869	6.38315	1.41864	5.68772	7.06895	0.64477	6.97648	4.80507	6.4615	0.0110237	0.152669
ENSG00000138668	heterogeneous nuclear ribonucleoprotein D (AU-rich element RNA binding protein 1, 37kDa) [Source:HGNC Symbol;Acc:5036]	HNRNPD	protein_coding	2.1071	7.69521	11.1225	8.85161	6.8727	5.67685	7.97072	7.98463	6.44618	0.0111191	0.153258
ENSG00000130766	sestrin 2 [Source:HGNC Symbol;Acc:20746]	SESN2	protein_coding	8.92583	4.80795	1.41864	0.353986	5.4067	0.64477	5.33595	0.492064	6.44522	0.0111251	0.153258
ENSG00000100225	F-box protein 7 [Source:HGNC Symbol;Acc:13586]	FBXO7	protein_coding	-2.92977	6.37996	3.18629	7.21467	4.92228	8.08052	4.87092	7.70798	6.44367	0.0111348	0.153258
ENSG00000109079	tumor necrosis factor, alpha-induced protein 1 (endothelial) [Source:HGNC Symbol;Acc:11894]	TNFAIP1	protein_coding	6.21064	6.07871	1.41864	5.2804	6.52481	1.26849	6.44141	4.48829	6.43737	0.0111744	0.153408
ENSG00000154237	leucine-rich repeat kinase 1 [Source:HGNC Symbol;Acc:18608]	LRRK1	protein_coding	7.76489	3.73552	1.41864	0.353986	4.28544	0.64477	4.22899	0.492064	6.43465	0.0111915	0.153408
ENSG00000102786	integrator complex subunit 6 [Source:HGNC Symbol;Acc:14879]	INTS6	protein_coding	5.17355	5.29012	4.81096	4.97939	5.74641	1.62691	5.70716	4.10936	6.42406	0.0112584	0.154011
ENSG00000115738	inhibitor of DNA binding 2, dominant negative helix-loop-helix protein [Source:HGNC Symbol;Acc:5361]	ID2	protein_coding	-3.44812	6.99293	2.41864	8.64739	4.21633	7.56979	4.16904	8.20698	6.41772	0.0112987	0.154247
ENSG00000269163		CTB-25J19.9	lincRNA	5.34907	3.18977	1.41864	2.53462	3.52634	0.768999	3.47818	1.94425	6.41004	0.0113477	0.1546
ENSG00000129682	fibroblast growth factor 13 [Source:HGNC Symbol;Acc:3670]	FGF13	protein_coding	8.84106	4.78793	1.41864	1.49866	5.35615	0.64477	5.28523	1.17515	6.39097	0.0114702	0.155953
ENSG00000169490	TM2 domain containing 2 [Source:HGNC Symbol;Acc:24127]	TM2D2	protein_coding	8.22638	4.79115	2.0036	6.09226	4.7856	0.64477	4.72554	5.17646	6.38687	0.0114968	0.155997
ENSG00000119953	survival motor neuron domain containing 1 [Source:HGNC Symbol;Acc:16900]	SMNDC1	protein_coding	-5.21382	5.10647	1.41864	5.60761	1.91183	7.30584	1.89542	6.6351	6.37156	0.0115964	0.157031
ENSG00000259327		CTD-2184D3.6	lincRNA	-2.09221	2.90643	3.32361	3.92217	1.43412	3.96897	1.53932	3.94458	6.34909	0.0117442	0.158712
ENSG00000152926	zinc finger protein 117 [Source:HGNC Symbol;Acc:12897]	ZNF117	protein_coding	6.84838	3.10549	1.41864	2.31835	3.63898	0.64477	3.59126	1.74768	6.34289	0.0117853	0.158947
ENSG00000067141	neogenin 1 [Source:HGNC Symbol;Acc:7754]	NEO1	protein_coding	-4.28442	4.55708	1.41864	5.74424	1.5766	6.85149	1.56741	6.40067	6.33601	0.011831	0.159244
ENSG00000132478	unkempt family zinc finger [Source:HGNC Symbol;Acc:29369]	UNK	protein_coding	7.85471	4.01244	1.41864	3.6259	4.2961	0.64477	4.23888	2.80091	6.32858	0.0118807	0.159323
ENSG00000087111	phosphatidylinositol glycan anchor biosynthesis, class S [Source:HGNC Symbol;Acc:14937]	PIGS	protein_coding	-2.50517	4.82396	4.47696	4.33106	3.0803	6.68908	3.15848	5.97999	6.32803	0.0118844	0.159323
ENSG00000125148	metallothionein 2A [Source:HGNC Symbol;Acc:7406]	MT2A	protein_coding	5.68618	9.38935	1.41864	6.85872	9.78187	4.52115	9.68447	6.19297	6.3213	0.0119296	0.159609
ENSG00000118217	activating transcription factor 6 [Source:HGNC Symbol;Acc:791]	ATF6	protein_coding	-3.44039	6.75132	1.56269	7.2933	4.88198	8.97114	4.81771	8.35651	6.30917	0.0120115	0.160385
ENSG00000128965	ChaC, cation transport regulator homolog 1 (E. coli) [Source:HGNC Symbol;Acc:28680]	CHAC1	protein_coding	7.63125	3.60928	1.41864	0.353986	4.19899	0.64477	4.13809	0.492064	6.30427	0.0120448	0.160509
ENSG00000184990	SIVA1, apoptosis-inducing factor [Source:HGNC Symbol;Acc:17712]	SIVA1	protein_coding	6.05037	5.28491	2.89113	4.9184	5.5836	1.31266	5.51864	4.00257	6.29934	0.0120783	0.160636
ENSG00000131374	TBC1 domain family, member 5 [Source:HGNC Symbol;Acc:19166]	TBC1D5	protein_coding	3.66309	5.02747	6.9595	3.24633	5.28194	2.72188	5.43232	3.02314	6.2876	0.0121586	0.161384
ENSG00000176834	V-set and immunoglobulin domain containing 10 [Source:HGNC Symbol;Acc:26078]	VSIG10	protein_coding	-3.48767	7.24799	1.41864	8.60966	5.13246	8.75703	5.06435	8.68622	6.28032	0.0122086	0.161728
ENSG00000065361	v-erb-b2 avian erythroblastic leukemia viral oncogene homolog 3 [Source:HGNC Symbol;Acc:3431]	ERBB3	protein_coding	-3.45954	5.80804	2.0036	7.52951	3.45278	7.23825	3.41488	7.38882	6.27589	0.0122391	0.161812
ENSG00000106789	coronin, actin binding protein, 2A [Source:HGNC Symbol;Acc:2255]	CORO2A	protein_coding	-1.95037	3.67779	3.41503	4.02277	2.23099	5.23384	2.28701	4.77197	6.27187	0.0122669	0.161861
ENSG00000100147	coiled-coil domain containing 134 [Source:HGNC Symbol;Acc:26185]	CCDC134	protein_coding	8.63412	4.52856	1.41864	0.353986	5.27783	0.64477	5.20641	0.492064	6.26264	0.012331	0.162387
ENSG00000152348	autophagy related 10 [Source:HGNC Symbol;Acc:20315]	ATG10	protein_coding	-2.3589	4.52064	4.15524	3.88096	2.63952	6.4536	2.72758	5.73419	6.25713	0.0123695	0.162573
ENSG00000123131	peroxiredoxin 4 [Source:HGNC Symbol;Acc:17169]	PRDX4	protein_coding	4.35888	6.89412	1.41864	5.02417	7.43658	3.78473	7.34649	4.56313	6.24691	0.012441	0.163194
ENSG00000132823	oxidative stress responsive serine-rich 1 [Source:HGNC Symbol;Acc:16105]	OSER1	protein_coding	9.42	5.57651	1.41864	6.12468	5.73601	0.64477	5.66265	5.08655	6.24256	0.0124716	0.163276
ENSG00000180346	tigger transposable element derived 2 [Source:HGNC Symbol;Acc:18333]	TIGD2	protein_coding	8.60339	4.4981	1.41864	0.353986	5.02652	0.64477	4.95851	0.492064	6.23417	0.0125308	0.163481
ENSG00000069667	RAR-related orphan receptor A [Source:HGNC Symbol;Acc:10258]	RORA	protein_coding	8.82577	4.89572	1.41864	4.5031	5.06311	0.64477	4.99678	3.50564	6.2329	0.0125398	0.163481
ENSG00000105483	caspase recruitment domain family, member 8 [Source:HGNC Symbol;Acc:17057]	CARD8	protein_coding	-2.64514	4.96942	2.67565	5.13099	3.59703	6.81959	3.56793	6.15338	6.22718	0.0125804	0.163481
ENSG00000164647	six transmembrane epithelial antigen of the prostate 1 [Source:HGNC Symbol;Acc:11378]	STEAP1	protein_coding	7.26842	3.29029	1.41864	0.353986	3.64979	0.64477	3.60296	0.492064	6.22384	0.0126041	0.163481
ENSG00000182957	spermatogenesis associated 13 [Source:HGNC Symbol;Acc:23222]	SPATA13	protein_coding	-2.75603	5.00766	2.63897	4.44237	3.54376	6.71273	3.51494	5.95202	6.22312	0.0126092	0.163481
ENSG00000119906	family with sequence similarity 178, member A [Source:HGNC Symbol;Acc:17814]	FAM178A	protein_coding	-3.04739	6.14365	3.22599	5.30068	4.39399	7.73005	4.35471	6.97234	6.20488	0.0127399	0.164856
ENSG00000115368	WD repeat domain 75 [Source:HGNC Symbol;Acc:25725]	WDR75	protein_coding	3.79288	5.50673	9.74057	4.10458	4.73823	2.67551	6.18608	3.64195	6.20049	0.0127715	0.164947
ENSG00000130313	6-phosphogluconolactonase [Source:HGNC Symbol;Acc:8903]	PGLS	protein_coding	6.00349	4.07155	7.2	2.2254	4.15567	0.768999	4.56493	1.7086	6.19666	0.0127992	0.164986
ENSG00000086848	ALG9, alpha-1,2-mannosyltransferase [Source:HGNC Symbol;Acc:15672]	ALG9	protein_coding	4.84752	6.02562	2.44012	3.85215	6.48632	2.65003	6.4063	3.43108	6.18146	0.0129096	0.16609
ENSG00000123064	DEAD (Asp-Glu-Ala-Asp) box polypeptide 54 [Source:HGNC Symbol;Acc:20084]	DDX54	protein_coding	5.73993	3.48901	1.41864	0.353986	3.79538	0.861643	3.74547	0.607529	6.17796	0.0129352	0.1661
ENSG00000160439	retinol dehydrogenase 13 (all-trans/9-cis) [Source:HGNC Symbol;Acc:19978]	RDH13	protein_coding	-1.39224	4.58098	4.60925	5.92035	3.38732	5.48925	3.457	5.71916	6.16349	0.0130414	0.167144
ENSG00000173467	anterior gradient 3 [Source:HGNC Symbol;Acc:24167]	AGR3	protein_coding	-6.39661	3.82506	1.41864	5.09561	0.353786	5.87363	0.391047	5.54043	6.15402	0.0131114	0.167711
ENSG00000205356	tectonin beta-propeller repeat containing 1 [Source:HGNC Symbol;Acc:22214]	TECPR1	protein_coding	3.07238	4.78531	3.64052	2.24134	5.07826	2.96469	5.03302	2.63484	6.1482	0.0131546	0.167711
ENSG00000152527	pleckstrin homology domain containing, family H (with MyTH4 domain) member 2 [Source:HGNC Symbol;Acc:30506]	PLEKHH2	protein_coding	-2.8067	5.07954	2.08767	5.48507	3.58691	6.41762	3.54254	6.03605	6.14596	0.0131713	0.167711
ENSG00000145782	autophagy related 12 [Source:HGNC Symbol;Acc:588]	ATG12	protein_coding	3.73733	5.94817	8.1547	7.71967	5.45588	2.61211	5.82934	6.73753	6.14403	0.0131857	0.167711
ENSG00000114861	forkhead box P1 [Source:HGNC Symbol;Acc:3823]	FOXP1	protein_coding	2.19565	8.12355	11.8637	6.76606	7.55328	6.95862	8.69891	6.86409	6.12355	0.0133393	0.169343
ENSG00000170525	6-phosphofructo-2-kinase/fructose-2,6-biphosphatase 3 [Source:HGNC Symbol;Acc:8874]	PFKFB3	protein_coding	-3.621	2.84708	1.41864	3.2938	1.06894	4.62313	1.07571	4.12668	6.09996	0.0135185	0.171139
ENSG00000127870	ring finger protein (C3H2C3 type) 6 [Source:HGNC Symbol;Acc:10069]	RNF6	protein_coding	6.78043	6.34139	1.41864	5.40051	6.73221	1.52674	6.64677	4.54805	6.09822	0.0135318	0.171139
ENSG00000111145	ELK3, ETS-domain protein (SRF accessory protein 2) [Source:HGNC Symbol;Acc:3325]	ELK3	protein_coding	3.34244	7.07292	11.5245	1.98964	5.93289	5.19393	7.91412	4.38168	6.08636	0.0136229	0.171701
ENSG00000104290	frizzled family receptor 3 [Source:HGNC Symbol;Acc:4041]	FZD3	protein_coding	3.55303	5.07231	4.2586	3.96489	5.41593	2.57633	5.3732	3.41279	6.08577	0.0136275	0.171701
ENSG00000134308	tyrosine 3-monooxygenase/tryptophan 5-monooxygenase activation protein, theta [Source:HGNC Symbol;Acc:12854]	YWHAQ	protein_coding	1.91471	8.16418	10.7696	8.44788	7.76365	6.73211	8.29705	7.84183	6.07468	0.0137134	0.172459
ENSG00000104375	serine/threonine kinase 3 [Source:HGNC Symbol;Acc:11406]	STK3	protein_coding	-1.73959	5.38894	4.58856	4.25138	4.21725	7.29074	4.23371	6.43707	6.05951	0.0138316	0.173559
ENSG00000088854	chromosome 20 open reading frame 194 [Source:HGNC Symbol;Acc:17721]	C20orf194	protein_coding	6.6998	4.11291	3.74057	5.97872	3.25305	0.64477	3.27046	5.10355	6.05008	0.0139056	0.173559
ENSG00000156976	eukaryotic translation initiation factor 4A2 [Source:HGNC Symbol;Acc:3284]	EIF4A2	protein_coding	1.54841	9.74828	11.333	8.69932	9.78879	9.54009	9.95984	9.17892	6.04877	0.013916	0.173559
ENSG00000105640	ribosomal protein L18a [Source:HGNC Symbol;Acc:10311]	RPL18A	protein_coding	1.74773	9.90819	9.61586	8.39996	10.1378	9.16557	10.1086	8.83067	6.04809	0.0139213	0.173559
ENSG00000124383	M-phase phosphoprotein 10 (U3 small nucleolar ribonucleoprotein) [Source:HGNC Symbol;Acc:7213]	MPHOSPH10	protein_coding	3.68095	5.78998	3.46827	7.87347	5.20591	2.12155	5.15286	6.89226	6.04695	0.0139303	0.173559
ENSG00000075643	molybdenum cofactor sulfurase [Source:HGNC Symbol;Acc:18234]	MOCOS	protein_coding	-1.84711	3.01602	4.85093	3.90678	1.29368	4.25491	1.69298	4.08915	6.03609	0.0140163	0.174088
ENSG00000143499	SET and MYND domain containing 2 [Source:HGNC Symbol;Acc:20982]	SMYD2	protein_coding	4.48111	3.7327	6.52716	6.00476	1.53945	0.64477	2.54931	4.98977	6.03503	0.0140247	0.174088
ENSG00000198917	chromosome 9 open reading frame 114 [Source:HGNC Symbol;Acc:26933]	C9orf114	protein_coding	8.37498	4.66156	1.41864	5.0174	4.75815	0.64477	4.69408	4.14425	6.02636	0.0140938	0.174622
ENSG00000156508	eukaryotic translation elongation factor 1 alpha 1 [Source:HGNC Symbol;Acc:3189]	EEF1A1	protein_coding	1.23626	13.8137	14.4576	12.6178	13.8933	13.5004	13.9385	13.1254	6.02015	0.0141434	0.174706
ENSG00000267100	ILF3 antisense RNA 1 (head to head) [Source:HGNC Symbol;Acc:27115]	ILF3-AS1	lincRNA	-2.21252	5.62983	4.1778	6.20192	4.11168	6.72088	4.11193	6.47999	6.01674	0.0141708	0.174706
ENSG00000104154	solute carrier family 30 (zinc transporter), member 4 [Source:HGNC Symbol;Acc:11015]	SLC30A4	protein_coding	-3.10794	4.97209	7.25381	3.5456	1.74809	7.06504	3.13659	6.19513	6.01575	0.0141788	0.174706
ENSG00000109814	UDP-glucose 6-dehydrogenase [Source:HGNC Symbol;Acc:12525]	UGDH	protein_coding	3.44192	9.75554	2.37841	4.54073	10.1913	7.26666	10.0937	6.49404	6.01206	0.0142084	0.174751
ENSG00000139055	endoplasmic reticulum protein 27 [Source:HGNC Symbol;Acc:26495]	ERP27	protein_coding	9.95216	5.93351	1.41864	5.40034	6.19706	0.64477	6.11673	4.39174	6.008	0.0142412	0.174833
ENSG00000111605	cleavage and polyadenylation specific factor 6, 68kDa [Source:HGNC Symbol;Acc:13871]	CPSF6	protein_coding	3.88856	5.57765	1.41864	0.478037	6.11999	3.07523	6.03791	2.22273	5.99694	0.0143307	0.17561
ENSG00000117143	UDP-N-acteylglucosamine pyrophosphorylase 1 [Source:HGNC Symbol;Acc:12457]	UAP1	protein_coding	8.8569	4.78999	1.41864	1.58265	5.15198	0.64477	5.08491	1.2347	5.98571	0.0144222	0.176056
ENSG00000173166	Ras association (RalGDS/AF-6) and pleckstrin homology domains 1 [Source:HGNC Symbol;Acc:14436]	RAPH1	protein_coding	-2.82384	4.91853	1.41864	4.50818	3.45532	6.84962	3.41085	6.06717	5.98301	0.0144443	0.176056
ENSG00000174444	ribosomal protein L4 [Source:HGNC Symbol;Acc:10353]	RPL4	protein_coding	2.58333	10.3009	9.81734	9.46073	10.4775	8.51931	10.4421	9.06669	5.98281	0.0144459	0.176056
ENSG00000166436	tripartite motif containing 66 [Source:HGNC Symbol;Acc:29005]	TRIM66	protein_coding	3.9782	5.91481	3.50949	2.0793	6.70594	3.18034	6.6188	2.71519	5.97125	0.014541	0.176893
ENSG00000214113	LYR motif containing 4 [Source:HGNC Symbol;Acc:21365]	LYRM4	protein_coding	4.19692	4.82247	2.18841	5.64023	4.96439	1.7238	4.90262	4.77172	5.96481	0.0145941	0.177171
ENSG00000176153	glutathione peroxidase 2 (gastrointestinal) [Source:HGNC Symbol;Acc:4554]	GPX2	protein_coding	-5.36755	5.85347	1.41864	7.82361	1.79416	7.48478	1.78	7.666	5.96192	0.0146181	0.177171
ENSG00000131910	nuclear receptor subfamily 0, group B, member 2 [Source:HGNC Symbol;Acc:7961]	NR0B2	protein_coding	9.56917	5.44771	1.41864	0.478037	5.86603	0.64477	5.78853	0.554488	5.95735	0.0146561	0.177171
ENSG00000197312	DNA-damage inducible 1 homolog 2 (S. cerevisiae) [Source:HGNC Symbol;Acc:24578]	DDI2	protein_coding	-2.01499	4.54212	3.58053	5.4163	2.7553	5.29869	2.79107	5.35972	5.95551	0.0146713	0.177171
ENSG00000132561	matrilin 2 [Source:HGNC Symbol;Acc:6908]	MATN2	protein_coding	-2.01514	4.35205	5.6601	4.97119	2.48652	6.48142	2.83265	5.91261	5.95255	0.014696	0.177171
ENSG00000114423	Cbl proto-oncogene B, E3 ubiquitin protein ligase [Source:HGNC Symbol;Acc:1542]	CBLB	protein_coding	-3.53564	4.72062	2.41864	3.28853	2.29514	7.08508	2.29547	6.18331	5.94455	0.0147629	0.177658
ENSG00000162522	KIAA1522 [Source:HGNC Symbol;Acc:29301]	KIAA1522	protein_coding	4.39046	4.58211	1.41864	4.38429	4.70121	1.53604	4.63914	3.60227	5.92013	0.0149689	0.179814
ENSG00000211456	SAC1 suppressor of actin mutations 1-like (yeast) [Source:HGNC Symbol;Acc:17059]	SACM1L	protein_coding	3.80731	5.41957	9.08042	5.46198	4.93854	2.23049	5.86706	4.66662	5.91256	0.0150333	0.180265
ENSG00000189376	chromosome 8 open reading frame 76 [Source:HGNC Symbol;Acc:25924]	C8orf76	protein_coding	6.20258	3.26128	1.41864	3.74892	3.65118	0.696388	3.60331	2.94846	5.90758	0.0150759	0.180378
ENSG00000180198	regulator of chromosome condensation 1 [Source:HGNC Symbol;Acc:1913]	RCC1	protein_coding	5.45281	4.99851	1.41864	1.0763	5.56141	1.57352	5.48738	1.32416	5.90516	0.0150966	0.180378
ENSG00000115514	thioredoxin domain containing 9 [Source:HGNC Symbol;Acc:24110]	TXNDC9	protein_coding	7.09536	5.19385	1.41864	4.88563	5.59153	0.865351	5.51593	4.04216	5.90123	0.0151303	0.18046
ENSG00000138750	nucleoporin 54kDa [Source:HGNC Symbol;Acc:17359]	NUP54	protein_coding	8.73479	4.83023	1.41864	4.60109	5.15782	0.64477	5.09037	3.77239	5.88778	0.0152463	0.181377
ENSG00000117616	chromosome 1 open reading frame 63 [Source:HGNC Symbol;Acc:25234]	C1orf63	protein_coding	-2.21618	6.48448	1.77478	3.71661	5.62251	8.49063	5.54943	7.51152	5.88605	0.0152613	0.181377
ENSG00000163386	neuroblastoma breakpoint family, member 10 [Source:HGNC Symbol;Acc:31992]	NBPF10	protein_coding	-2.06998	8.37374	7.16065	9.16003	6.87324	9.45722	6.89131	9.31634	5.88242	0.0152928	0.181392
ENSG00000187098	microphthalmia-associated transcription factor [Source:HGNC Symbol;Acc:7105]	MITF	protein_coding	-2.1072	5.70016	1.41864	8.27374	-0.0931393	0.762462	-0.0292957	7.27815	5.87967	0.0153167	0.181392
ENSG00000065183	WD repeat domain 3 [Source:HGNC Symbol;Acc:12755]	WDR3	protein_coding	6.96917	5.1314	1.41864	3.50167	5.6146	0.978179	5.53985	2.8525	5.85725	0.015513	0.183392
ENSG00000162889	mitogen-activated protein kinase-activated protein kinase 2 [Source:HGNC Symbol;Acc:6887]	MAPKAPK2	protein_coding	4.74491	3.16428	1.41864	3.66192	3.2438	0.865351	3.2016	2.96235	5.82664	0.0157853	0.186046
ENSG00000140694	poly(A)-specific ribonuclease [Source:HGNC Symbol;Acc:8609]	PARN	protein_coding	4.65832	3.38579	3.22805	4.36706	3.59262	0.976578	3.57689	3.54797	5.82514	0.0157987	0.186046
ENSG00000150093	integrin, beta 1 (fibronectin receptor, beta polypeptide, antigen CD29 includes MDF2, MSK12) [Source:HGNC Symbol;Acc:6153]	ITGB1	protein_coding	-1.86101	9.8537	1.41864	10.718	8.71241	10.9877	8.61725	10.8592	5.82156	0.0158309	0.186046
ENSG00000099250	neuropilin 1 [Source:HGNC Symbol;Acc:8004]	NRP1	protein_coding	-2.98985	6.31939	1.41864	7.49922	4.80402	7.57995	4.73897	7.54076	5.81961	0.0158484	0.186046
ENSG00000182481	karyopherin alpha 2 (RAG cohort 1, importin alpha 1) [Source:HGNC Symbol;Acc:6395]	KPNA2	protein_coding	8.9196	6.39043	1.41864	8.85437	5.37551	0.64477	5.3045	7.85418	5.8122	0.0159153	0.186365
ENSG00000100280	adaptor-related protein complex 1, beta 1 subunit [Source:HGNC Symbol;Acc:554]	AP1B1	protein_coding	7.03637	4.71429	1.41864	4.55497	4.92387	0.857942	4.85735	3.81577	5.80923	0.0159422	0.186365
ENSG00000144451	sperm associated antigen 16 [Source:HGNC Symbol;Acc:23225]	SPAG16	protein_coding	-3.14624	4.13496	2.59177	3.77217	2.34216	5.5938	2.34729	4.96558	5.80738	0.0159591	0.186365
ENSG00000137207	Yip1 domain family, member 3 [Source:HGNC Symbol;Acc:21023]	YIPF3	protein_coding	4.90169	7.53059	2.0036	8.59666	7.35664	3.39308	7.26771	7.6221	5.79835	0.0160412	0.186845
ENSG00000174951	fucosyltransferase 1 (galactoside 2-alpha-L-fucosyltransferase, H blood group) [Source:HGNC Symbol;Acc:4012]	FUT1	protein_coding	2.76387	5.12387	6.40914	5.57292	5.09723	3.17763	5.1981	4.88	5.79674	0.0160559	0.186845
ENSG00000165516	kelch domain containing 2 [Source:HGNC Symbol;Acc:20231]	KLHDC2	protein_coding	7.92094	3.9251	1.41864	1.15636	4.54898	0.64477	4.48186	0.934611	5.77701	0.0162371	0.188626
ENSG00000118816	cyclin I [Source:HGNC Symbol;Acc:1595]	CCNI	protein_coding	2.35966	8.4113	9.75633	8.79254	8.25384	6.58561	8.41319	8.07754	5.76745	0.0163257	0.189327
ENSG00000250305	KIAA1456 [Source:HGNC Symbol;Acc:26725]	KIAA1456	protein_coding	-1.5703	4.33191	5.42718	4.84564	2.93835	5.57395	3.16451	5.26209	5.75919	0.0164026	0.189891
ENSG00000188971		RP11-427H3.3	lincRNA	3.61848	6.31361	3.66809	5.36433	6.67152	3.78113	6.5945	4.74787	5.75256	0.0164646	0.190093
ENSG00000170185	ubiquitin specific peptidase 38 [Source:HGNC Symbol;Acc:20067]	USP38	protein_coding	6.69285	3.74537	1.41864	2.08487	4.18831	0.755588	4.13278	1.58198	5.75126	0.0164768	0.190093
ENSG00000070669	asparagine synthetase (glutamine-hydrolyzing) [Source:HGNC Symbol;Acc:753]	ASNS	protein_coding	4.71281	6.96243	1.41864	6.0402	7.41566	3.38553	7.32509	5.34793	5.73958	0.0165868	0.191033
ENSG00000260257		RP5-1085F17.3	lincRNA	5.68464	6.11546	1.41864	5.31302	6.6684	2.0767	6.58185	4.57775	5.7278	0.0166983	0.191794
ENSG00000111142	methionyl aminopeptidase 2 [Source:HGNC Symbol;Acc:16672]	METAP2	protein_coding	2.4454	5.55977	7.26413	3.72518	5.59151	4.55926	5.74759	4.19395	5.72418	0.0167329	0.191794
ENSG00000132950	zinc finger, MYM-type 5 [Source:HGNC Symbol;Acc:13029]	ZMYM5	protein_coding	-1.81612	5.73932	4.03688	5.46379	4.73418	7.3976	4.70501	6.74959	5.72286	0.0167455	0.191794
ENSG00000134684	tyrosyl-tRNA synthetase [Source:HGNC Symbol;Acc:12840]	YARS	protein_coding	3.62689	6.28283	2.76063	6.24027	6.86229	3.48576	6.77822	5.47062	5.72057	0.0167673	0.191794
ENSG00000216490	interferon, gamma-inducible protein 30 [Source:HGNC Symbol;Acc:5398]	IFI30	protein_coding	2.94153	6.77853	11.1347	6.28993	5.58792	4.18394	7.52416	5.61814	5.70174	0.0169481	0.193532
ENSG00000011523	centrosomal protein 68kDa [Source:HGNC Symbol;Acc:29076]	CEP68	protein_coding	2.44724	5.53828	7.01319	5.56258	5.56597	4.00168	5.69601	5.01168	5.68894	0.0170722	0.194523
ENSG00000152779	solute carrier family 16, member 12 [Source:HGNC Symbol;Acc:23094]	SLC16A12	protein_coding	4.5916	4.43559	2.74633	1.03439	4.79226	1.7141	4.73954	1.39373	5.68678	0.0170932	0.194523
ENSG00000064601	cathepsin A [Source:HGNC Symbol;Acc:9251]	CTSA	protein_coding	4.9641	5.26593	1.41864	5.14886	5.54836	1.87955	5.47374	4.35466	5.68225	0.0171374	0.194523
ENSG00000087095	nemo-like kinase [Source:HGNC Symbol;Acc:29858]	NLK	protein_coding	6.60025	2.77491	1.41864	0.478037	3.12158	0.64477	3.08242	0.554488	5.6786	0.0171731	0.194523
ENSG00000205060	solute carrier family 35 (UDP-xylose/UDP-N-acetylglucosamine transporter), member B4 [Source:HGNC Symbol;Acc:20584]	SLC35B4	protein_coding	-3.50451	2.63866	1.41864	3.76597	0.874389	4.40472	0.888297	4.1147	5.67623	0.0171963	0.194523
ENSG00000080200	beta-gamma crystallin domain containing 3 [Source:HGNC Symbol;Acc:34427]	CRYBG3	protein_coding	8.05032	4.61751	1.41864	6.25157	4.39772	0.64477	4.3403	5.19832	5.67493	0.0172091	0.194523
ENSG00000115268	ribosomal protein S15 [Source:HGNC Symbol;Acc:10388]	RPS15	protein_coding	1.63147	8.43789	10.0441	7.27263	8.46913	7.77608	8.64133	7.54486	5.65204	0.017435	0.195965
ENSG00000105971	caveolin 2 [Source:HGNC Symbol;Acc:1528]	CAV2	protein_coding	-2.64211	6.74171	4.13563	7.37743	5.25519	8.37606	5.21331	7.96465	5.65112	0.0174443	0.195965
ENSG00000221947	XK, Kell blood group complex subunit-related family, member 9 [Source:HGNC Symbol;Acc:20937]	XKR9	protein_coding	-2.34845	3.94519	1.41864	3.94051	2.9018	5.83033	2.86446	5.15629	5.64866	0.0174687	0.195965
ENSG00000132330	selenocysteine lyase [Source:HGNC Symbol;Acc:18161]	SCLY	protein_coding	-1.70285	3.79725	3.48903	4.46849	2.57703	5.19486	2.61592	4.87786	5.64858	0.0174696	0.195965
ENSG00000125398	SRY (sex determining region Y)-box 9 [Source:HGNC Symbol;Acc:11204]	SOX9	protein_coding	-3.75433	6.27143	1.41864	7.16107	3.81438	7.69849	3.76398	7.44925	5.64725	0.0174828	0.195965
ENSG00000198909	mitogen-activated protein kinase kinase kinase 3 [Source:HGNC Symbol;Acc:6855]	MAP3K3	protein_coding	8.44438	4.88119	7.90189	4.28949	5.19897	0.64477	5.56564	3.56528	5.63756	0.0175796	0.196722
ENSG00000029639	transcription factor B1, mitochondrial [Source:HGNC Symbol;Acc:17037]	TFB1M	protein_coding	5.87127	3.36209	3.21565	2.71293	3.77388	0.767898	3.75321	2.15415	5.61711	0.017786	0.198699
ENSG00000225339		RP11-513I15.6	lincRNA	-2.72903	7.42675	5.68954	8.59307	5.52992	9.30102	5.53721	8.98701	5.60896	0.0178689	0.199293
ENSG00000196387	zinc finger protein 140 [Source:HGNC Symbol;Acc:12925]	ZNF140	protein_coding	8.06702	5.79636	1.41864	3.62549	6.45003	0.866051	6.36597	2.78382	5.60397	0.0179198	0.19937
ENSG00000228106		RP11-452F19.3	lincRNA	6.86296	3.60885	1.41864	5.19693	3.55778	0.64477	3.5122	4.15089	5.59982	0.0179623	0.19937
ENSG00000052344	protease, serine, 8 [Source:HGNC Symbol;Acc:9491]	PRSS8	protein_coding	5.02478	6.28146	2.0036	4.09157	6.76776	2.45395	6.68325	3.46292	5.59956	0.017965	0.19937
ENSG00000100889	phosphoenolpyruvate carboxykinase 2 (mitochondrial) [Source:HGNC Symbol;Acc:8725]	PCK2	protein_coding	7.95009	4.96074	1.41864	0.353986	5.36681	0.764963	5.29726	0.554456	5.59592	0.0180023	0.199416
ENSG00000156482	ribosomal protein L30 [Source:HGNC Symbol;Acc:10333]	RPL30	protein_coding	1.23805	9.07092	9.70804	7.81948	9.16649	8.82967	9.20838	8.41036	5.59336	0.0180286	0.199416
ENSG00000111011	arginine/serine-rich coiled-coil 2 [Source:HGNC Symbol;Acc:30559]	RSRC2	protein_coding	-2.62663	7.33091	1.41864	7.3725	5.89364	8.92966	5.81665	8.3481	5.58289	0.0181368	0.200164
ENSG00000107290	senataxin [Source:HGNC Symbol;Acc:445]	SETX	protein_coding	-2.45317	6.03708	7.0625	6.86088	3.80159	7.28915	4.24787	7.08645	5.57635	0.0182046	0.200164
ENSG00000181090	euchromatic histone-lysine N-methyltransferase 1 [Source:HGNC Symbol;Acc:24650]	EHMT1	protein_coding	-1.91508	5.45091	6.28876	4.88566	3.73862	7.28655	4.00261	6.48027	5.5759	0.0182093	0.200164
ENSG00000144182	lipoyltransferase 1 [Source:HGNC Symbol;Acc:29569]	LIPT1	protein_coding	-1.5966	3.63129	4.0072	5.30952	2.02622	4.06959	2.15185	4.83039	5.57528	0.0182157	0.200164
ENSG00000105171	processing of precursor 4, ribonuclease P/MRP subunit (S. cerevisiae) [Source:HGNC Symbol;Acc:30081]	POP4	protein_coding	-2.63102	5.54674	2.1057	3.78142	4.36747	7.23389	4.31415	6.38157	5.56093	0.0183657	0.200627
ENSG00000043143	jade family PHD finger 2 [Source:HGNC Symbol;Acc:22984]	JADE2	protein_coding	9.0494	5.09845	1.41864	4.95523	5.41606	0.64477	5.34377	3.96187	5.55934	0.0183823	0.200627
ENSG00000198925	autophagy related 9A [Source:HGNC Symbol;Acc:22408]	ATG9A	protein_coding	8.5741	4.93048	1.41864	5.3982	5.21981	0.64477	5.14426	4.42254	5.55923	0.0183835	0.200627
ENSG00000105939	zinc finger CCCH-type, antiviral 1 [Source:HGNC Symbol;Acc:23721]	ZC3HAV1	protein_coding	-2.39828	8.04731	3.88331	8.07663	6.98526	9.85298	6.90552	9.20629	5.55508	0.0184271	0.200627
ENSG00000197608	zinc finger protein 841 [Source:HGNC Symbol;Acc:27611]	ZNF841	protein_coding	4.00568	5.61251	3.43834	2.05283	6.00025	2.94296	5.9337	2.54771	5.55432	0.0184352	0.200627
ENSG00000082641	nuclear factor, erythroid 2-like 1 [Source:HGNC Symbol;Acc:7781]	NFE2L1	protein_coding	-3.10078	4.95048	3.22599	4.23271	3.0513	7.12905	3.05447	6.31538	5.54844	0.0184972	0.200627
ENSG00000177674	angiotensin II receptor-associated protein [Source:HGNC Symbol;Acc:13539]	AGTRAP	protein_coding	3.70229	7.98297	7.9885	6.21909	8.37331	5.52315	8.35134	5.92775	5.54803	0.0185015	0.200627
ENSG00000100023	peptidylprolyl isomerase (cyclophilin)-like 2 [Source:HGNC Symbol;Acc:9261]	PPIL2	protein_coding	2.65733	7.01905	11.945	5.22706	3.76777	3.09031	8.03645	4.55229	5.54754	0.0185067	0.200627
ENSG00000180423	harbinger transposase derived 1 [Source:HGNC Symbol;Acc:26522]	HARBI1	protein_coding	-2.65984	3.88413	2.23011	6.04727	1.69485	4.68055	1.71023	5.5069	5.54559	0.0185273	0.200627
ENSG00000099942	v-crk avian sarcoma virus CT10 oncogene homolog-like [Source:HGNC Symbol;Acc:2363]	CRKL	protein_coding	4.56035	4.59646	1.41864	0.353986	4.8968	1.68849	4.83275	1.11354	5.5372	0.0186163	0.201266
ENSG00000116871	MAP7 domain containing 1 [Source:HGNC Symbol;Acc:25514]	MAP7D1	protein_coding	5.2083	3.12124	2.98667	4.37201	3.1292	0.762462	3.12113	3.54075	5.53244	0.0186671	0.201301
ENSG00000164266	serine peptidase inhibitor, Kazal type 1 [Source:HGNC Symbol;Acc:11244]	SPINK1	protein_coding	2.7731	11.3972	9.35528	6.21043	11.8858	10.2712	11.8044	9.34994	5.53039	0.018689	0.201301
ENSG00000108064	transcription factor A, mitochondrial [Source:HGNC Symbol;Acc:11741]	TFAM	protein_coding	5.18998	5.56773	1.41864	5.70201	6.0814	1.91176	6.00178	4.85124	5.52539	0.0187424	0.201301
ENSG00000197885	NFKB inhibitor interacting Ras-like 1 [Source:HGNC Symbol;Acc:17899]	NKIRAS1	protein_coding	7.99843	4.56243	2.0036	5.71711	4.56051	0.64477	4.50271	4.85606	5.52246	0.0187739	0.201301
ENSG00000013364	major vault protein [Source:HGNC Symbol;Acc:7531]	MVP	protein_coding	2.81412	6.63244	4.80614	5.32842	6.90314	4.66143	6.83573	5.02355	5.52108	0.0187887	0.201301
ENSG00000050426	LETM1 domain containing 1 [Source:HGNC Symbol;Acc:24241]	LETMD1	protein_coding	2.30234	5.54977	6.92326	4.57537	5.59148	4.3866	5.701	4.48151	5.52005	0.0187997	0.201301
ENSG00000174151	cytochrome b561 family, member D1 [Source:HGNC Symbol;Acc:26804]	CYB561D1	protein_coding	-2.60199	5.15741	2.8649	5.72859	3.29577	6.39575	3.27858	6.09926	5.50489	0.0189634	0.20273
ENSG00000121892	PDS5, regulator of cohesion maintenance, homolog A (S. cerevisiae) [Source:HGNC Symbol;Acc:29088]	PDS5A	protein_coding	-3.05344	7.27939	1.84625	4.81568	5.83837	9.41411	5.76388	8.45815	5.50182	0.0189967	0.202763
ENSG00000037749	microfibrillar-associated protein 3 [Source:HGNC Symbol;Acc:7034]	MFAP3	protein_coding	7.73757	5.47718	3.0036	5.74028	5.96759	0.864733	5.89687	4.73259	5.4947	0.0190742	0.203266
ENSG00000165795	NDRG family member 2 [Source:HGNC Symbol;Acc:14460]	NDRG2	protein_coding	-1.69564	3.11503	3.82327	4.02089	1.68542	4.04958	1.82483	4.03456	5.49027	0.0191226	0.203458
ENSG00000140836	zinc finger homeobox 3 [Source:HGNC Symbol;Acc:777]	ZFHX3	protein_coding	-2.83138	6.65173	1.41864	4.57783	5.37541	8.51972	5.30421	7.60507	5.48029	0.019232	0.204262
ENSG00000244306		CTD-2314B22.3	lincRNA	3.67347	3.62901	2.88592	0.495159	4.12634	2.05631	4.08971	1.42788	5.47576	0.019282	0.204262
ENSG00000183207	RuvB-like AAA ATPase 2 [Source:HGNC Symbol;Acc:10475]	RUVBL2	protein_coding	2.6288	5.9118	9.68758	4.05369	5.51326	4.68303	6.52115	4.38397	5.47507	0.0192896	0.204262
ENSG00000080371	RAB21, member RAS oncogene family [Source:HGNC Symbol;Acc:18263]	RAB21	protein_coding	-2.78078	8.04044	3.26664	7.6511	6.65625	9.87646	6.57749	9.14074	5.45462	0.0195167	0.205783
ENSG00000174720	La ribonucleoprotein domain family, member 7 [Source:HGNC Symbol;Acc:24912]	LARP7	protein_coding	-2.22363	6.22753	6.25153	5.59593	4.37189	8.324	4.53407	7.45755	5.45166	0.0195497	0.205783
ENSG00000186185	kinesin family member 18B [Source:HGNC Symbol;Acc:27102]	KIF18B	protein_coding	-1.56077	4.09814	3.03217	5.57261	2.80556	4.8064	2.81061	5.24135	5.45147	0.0195519	0.205783
ENSG00000130414	NADH dehydrogenase (ubiquinone) 1 alpha subcomplex, 10, 42kDa [Source:HGNC Symbol;Acc:7684]	NDUFA10	protein_coding	2.58264	6.88122	6.57649	7.55266	6.98216	4.94905	6.95929	6.785	5.4511	0.019556	0.205783
ENSG00000120725	SIL1 nucleotide exchange factor [Source:HGNC Symbol;Acc:24624]	SIL1	protein_coding	4.69492	4.59248	1.41864	2.75717	5.235	1.74573	5.16389	2.35095	5.43723	0.0197119	0.206823
ENSG00000023228	NADH dehydrogenase (ubiquinone) Fe-S protein 1, 75kDa (NADH-coenzyme Q reductase) [Source:HGNC Symbol;Acc:7707]	NDUFS1	protein_coding	-2.247	5.99492	5.88069	6.7822	4.14251	7.93742	4.27952	7.45508	5.43682	0.0197165	0.206823
ENSG00000204219	transcription elongation factor A (SII), 3 [Source:HGNC Symbol;Acc:11615]	TCEA3	protein_coding	7.14212	3.4978	1.41864	4.08403	3.68479	0.64477	3.63764	3.17508	5.43018	0.0197916	0.207099
ENSG00000135070	iron-sulfur cluster assembly 1 [Source:HGNC Symbol;Acc:28660]	ISCA1	protein_coding	-3.03413	5.64458	3.56105	6.5557	3.70526	7.61537	3.69676	7.16286	5.42903	0.0198047	0.207099
ENSG00000100890	KIAA0391 [Source:HGNC Symbol;Acc:19958]	KIAA0391	protein_coding	7.65826	5.56472	1.41864	8.32604	4.11993	0.64477	4.06548	7.31074	5.42157	0.0198894	0.207662
ENSG00000132376	inositol polyphosphate-5-phosphatase K [Source:HGNC Symbol;Acc:33882]	INPP5K	protein_coding	5.39728	3.73705	2.41864	4.05054	3.95585	0.945006	3.91444	3.27685	5.39093	0.0202417	0.210547
ENSG00000152767	FERM, RhoGEF (ARHGEF) and pleckstrin domain protein 1 (chondrocyte-derived) [Source:HGNC Symbol;Acc:3591]	FARP1	protein_coding	-1.88354	6.06573	6.22006	7.23467	4.41818	7.38589	4.5832	7.30893	5.38977	0.0202552	0.210547
ENSG00000169599	NFU1 iron-sulfur cluster scaffold homolog (S. cerevisiae) [Source:HGNC Symbol;Acc:16287]	NFU1	protein_coding	2.92114	5.52345	9.10514	4.05741	5.40405	4.11568	6.14443	4.08622	5.38935	0.02026	0.210547
ENSG00000165650	PDZ domain containing 8 [Source:HGNC Symbol;Acc:26974]	PDZD8	protein_coding	1.68561	8.17047	10.3944	7.7072	8.05249	7.48907	8.38526	7.60371	5.3749	0.0204285	0.211419
ENSG00000130940	castor zinc finger 1 [Source:HGNC Symbol;Acc:26002]	CASZ1	protein_coding	-3.81048	3.56885	1.41864	4.38928	1.33185	5.21797	1.33023	4.84893	5.37451	0.0204331	0.211419
ENSG00000104218	centrosome and spindle pole associated protein 1 [Source:HGNC Symbol;Acc:26193]	CSPP1	protein_coding	-3.19806	5.35931	1.41864	6.39162	3.69437	7.14167	3.64728	6.82511	5.36784	0.0205113	0.211419
ENSG00000114439	bobby sox homolog (Drosophila) [Source:HGNC Symbol;Acc:14422]	BBX	protein_coding	-2.27175	6.62148	2.74057	5.77915	5.42967	8.14225	5.3648	7.40212	5.36579	0.0205354	0.211419
ENSG00000123562	mortality factor 4 like 2 [Source:HGNC Symbol;Acc:16849]	MORF4L2	protein_coding	-2.0466	8.39967	3.22599	8.58497	7.37753	9.99059	7.29153	9.44473	5.36501	0.0205447	0.211419
ENSG00000111348	Rho GDP dissociation inhibitor (GDI) beta [Source:HGNC Symbol;Acc:679]	ARHGDIB	protein_coding	6.63138	5.72243	9.29516	4.63865	5.50199	0.88464	6.28573	3.90643	5.36462	0.0205493	0.211419
ENSG00000125730	complement component 3 [Source:HGNC Symbol;Acc:1318]	C3	protein_coding	-1.87725	6.98012	6.74687	8.97633	4.87524	7.10428	5.05287	8.31956	5.35903	0.0206153	0.211419
ENSG00000113812	ARP8 actin-related protein 8 homolog (yeast) [Source:HGNC Symbol;Acc:14672]	ACTR8	protein_coding	8.16985	4.45804	1.41864	5.22035	4.56674	0.64477	4.50553	4.236	5.35853	0.0206211	0.211419
ENSG00000100811	YY1 transcription factor [Source:HGNC Symbol;Acc:12856]	YY1	protein_coding	3.84383	5.93595	3.21358	5.11904	6.29933	2.6252	6.22554	4.37263	5.35797	0.0206278	0.211419
ENSG00000091136	laminin, beta 1 [Source:HGNC Symbol;Acc:6486]	LAMB1	protein_coding	-3.76605	5.62368	1.41864	7.28781	2.02592	6.39301	2.00758	6.91944	5.35254	0.0206921	0.211754
ENSG00000253313	chromosome 1 open reading frame 210 [Source:HGNC Symbol;Acc:28755]	C1orf210	protein_coding	-2.24086	4.17458	5.18947	5.07638	2.26986	5.8639	2.54593	5.53625	5.33731	0.0208737	0.213091
ENSG00000114942	eukaryotic translation elongation factor 1 beta 2 [Source:HGNC Symbol;Acc:3208]	EEF1B2	protein_coding	3.4166	9.27068	1.41864	7.61385	9.64254	6.80949	9.54539	7.27053	5.33626	0.0208863	0.213091
ENSG00000094841	uracil phosphoribosyltransferase (FUR1) homolog (S. cerevisiae) [Source:HGNC Symbol;Acc:28334]	UPRT	protein_coding	4.84121	2.17031	1.41864	0.353986	2.58624	0.760049	2.55573	0.552172	5.32785	0.0209873	0.213796
ENSG00000124802	eukaryotic translation elongation factor 1 epsilon 1 [Source:HGNC Symbol;Acc:3212]	EEF1E1	protein_coding	3.87715	5.82884	9.80881	5.06675	5.22996	2.7855	6.43689	4.41798	5.32445	0.0210283	0.213889
ENSG00000124102	peptidase inhibitor 3, skin-derived [Source:HGNC Symbol;Acc:8947]	PI3	protein_coding	-6.08998	5.90963	1.41864	3.36507	2.05861	8.158	2.03811	7.20758	5.31325	0.0211638	0.214785
ENSG00000147403	ribosomal protein L10 [Source:HGNC Symbol;Acc:10298]	RPL10	protein_coding	1.69252	10.8464	10.3428	9.29482	11.0533	10.0592	11.0156	9.72549	5.31188	0.0211805	0.214785
ENSG00000089094	lysine (K)-specific demethylase 2B [Source:HGNC Symbol;Acc:13610]	KDM2B	protein_coding	-1.46761	4.05825	4.53217	4.03256	3.01063	5.47706	3.10157	4.87284	5.30791	0.0212289	0.21495
ENSG00000091879	angiopoietin 2 [Source:HGNC Symbol;Acc:485]	ANGPT2	protein_coding	2.70861	4.07514	4.006	1.70884	4.42943	2.73147	4.41138	2.2722	5.29936	0.0213333	0.215022
ENSG00000143153	ATPase, Na+/K+ transporting, beta 1 polypeptide [Source:HGNC Symbol;Acc:804]	ATP1B1	protein_coding	-2.07587	7.84103	3.87807	8.67088	6.62549	8.73794	6.5495	8.70481	5.2979	0.0213512	0.215022
ENSG00000120756	plastin 1 [Source:HGNC Symbol;Acc:9090]	PLS1	protein_coding	-3.8108	7.84915	1.41864	7.6687	5.89778	9.46343	5.82146	8.82484	5.29587	0.021376	0.215022
ENSG00000181991	mitochondrial ribosomal protein S11 [Source:HGNC Symbol;Acc:14050]	MRPS11	protein_coding	-3.49575	5.31898	1.41864	5.48592	3.39076	7.8197	3.34575	7.06339	5.29487	0.0213883	0.215022
ENSG00000100625	SIX homeobox 4 [Source:HGNC Symbol;Acc:10890]	SIX4	protein_coding	-1.39601	4.13181	3.99395	5.02441	3.03007	5.14387	3.07635	5.08501	5.29241	0.0214185	0.215022
ENSG00000116237	isoprenylcysteine carboxyl methyltransferase [Source:HGNC Symbol;Acc:5350]	ICMT	protein_coding	3.22165	4.09412	3.35032	3.34077	4.42584	2.22141	4.39007	2.93563	5.29161	0.0214284	0.215022
ENSG00000203791	methyltransferase like 10 [Source:HGNC Symbol;Acc:33787]	METTL10	protein_coding	-4.82124	5.52458	1.41864	6.91579	1.11934	6.52273	1.12469	6.73761	5.28317	0.0215325	0.215497
ENSG00000186480	insulin induced gene 1 [Source:HGNC Symbol;Acc:6083]	INSIG1	protein_coding	5.37537	5.63864	1.41864	1.39016	6.22903	1.61266	6.14818	1.49544	5.28126	0.0215562	0.215497
ENSG00000198832	Selenoprotein M [Source:UniProtKB/Swiss-Prot;Acc:Q8WWX9]	SELM	protein_coding	4.68744	5.23633	2.42224	4.9593	5.42682	1.89082	5.35988	4.23669	5.27792	0.0215976	0.215497
ENSG00000138286	family with sequence similarity 149, member B1 [Source:HGNC Symbol;Acc:29162]	FAM149B1	protein_coding	-4.21681	4.04627	1.41864	6.77587	0.749223	4.17892	0.768099	6.0119	5.27737	0.0216043	0.215497
ENSG00000204899	mitotic spindle organizing protein 1 [Source:HGNC Symbol;Acc:33830]	MZT1	protein_coding	8.25122	4.28009	1.41864	3.25986	4.84532	0.64477	4.78101	2.55994	5.26418	0.0217687	0.216813
ENSG00000196774	ankyrin repeat domain 20 family, member A1 [Source:HGNC Symbol;Acc:23665]	ANKRD20A1	protein_coding	6.30044	2.53677	1.41864	0.544166	3.05628	0.64477	3.0177	0.588717	5.25646	0.0218655	0.217455
ENSG00000101337	transmembrane 9 superfamily protein member 4 [Source:HGNC Symbol;Acc:30797]	TM9SF4	protein_coding	5.674	4.72224	1.41864	2.15837	5.09076	1.23632	5.02401	1.81672	5.24294	0.0220361	0.218826
ENSG00000133739	leucine rich repeat and coiled-coil centrosomal protein 1 [Source:HGNC Symbol;Acc:29373]	LRRCC1	protein_coding	6.9581	3.12978	1.41864	2.02667	3.55708	0.64477	3.5112	1.53286	5.23959	0.0220784	0.218923
ENSG00000143322	c-abl oncogene 2, non-receptor tyrosine kinase [Source:HGNC Symbol;Acc:77]	ABL2	protein_coding	3.41292	6.76993	5.44544	7.78345	6.40129	3.53788	6.35952	6.86735	5.2339	0.0221508	0.219203
ENSG00000148303	ribosomal protein L7a [Source:HGNC Symbol;Acc:10364]	RPL7A	protein_coding	1.81859	9.37543	10.3028	8.21755	9.49993	8.68275	9.56824	8.46825	5.23223	0.0221721	0.219203
ENSG00000081377	cell division cycle 14B [Source:HGNC Symbol;Acc:1719]	CDC14B	protein_coding	-1.86377	4.93171	2.81096	5.59722	3.8348	6.17605	3.79888	5.91718	5.22263	0.0222948	0.220072
ENSG00000143321	hepatoma-derived growth factor [Source:HGNC Symbol;Acc:4856]	HDGF	protein_coding	1.94796	5.94663	9.78933	5.99026	5.01815	4.29715	6.33351	5.3778	5.22022	0.0223257	0.220072
ENSG00000162104	adenylate cyclase 9 [Source:HGNC Symbol;Acc:240]	ADCY9	protein_coding	5.26958	3.68141	1.41864	1.62659	4.35405	1.03828	4.2957	1.38274	5.20502	0.0225218	0.2214
ENSG00000126458	related RAS viral (r-ras) oncogene homolog [Source:HGNC Symbol;Acc:10447]	RRAS	protein_coding	-4.28698	3.275	1.41864	0.582345	1.19461	5.58809	1.19729	4.63472	5.20466	0.0225265	0.2214
ENSG00000164292	Rho-related BTB domain containing 3 [Source:HGNC Symbol;Acc:18757]	RHOBTB3	protein_coding	3.31594	5.93772	3.64823	3.99168	6.54125	3.79185	6.46614	3.90307	5.19827	0.0226094	0.22189
ENSG00000159840	zyxin [Source:HGNC Symbol;Acc:13200]	ZYX	protein_coding	-3.61157	5.28366	1.41864	5.01233	3.41426	7.21295	3.37062	6.50007	5.19137	0.0226993	0.222447
ENSG00000177189	ribosomal protein S6 kinase, 90kDa, polypeptide 3 [Source:HGNC Symbol;Acc:10432]	RPS6KA3	protein_coding	-1.81275	7.28022	4.66277	5.28186	6.40092	9.40854	6.34038	8.46377	5.18411	0.0227943	0.223051
ENSG00000105438	KDEL (Lys-Asp-Glu-Leu) endoplasmic reticulum protein retention receptor 1 [Source:HGNC Symbol;Acc:6304]	KDELR1	protein_coding	4.50654	5.95733	1.41864	5.05016	6.30675	2.75212	6.22552	4.30663	5.17535	0.0229096	0.223568
ENSG00000133641	chromosome 12 open reading frame 29 [Source:HGNC Symbol;Acc:25322]	C12orf29	protein_coding	8.30217	4.3906	1.41864	3.99265	4.71013	0.64477	4.6487	3.26457	5.17502	0.0229138	0.223568
ENSG00000171928	trans-golgi network vesicle protein 23 homolog B (S. cerevisiae) [Source:HGNC Symbol;Acc:20399]	TVP23B	protein_coding	-2.41189	7.11647	1.41864	7.92282	5.77725	8.51591	5.70138	8.24807	5.16329	0.0230691	0.224756
ENSG00000164830	oxidation resistance 1 [Source:HGNC Symbol;Acc:15822]	OXR1	protein_coding	-3.37774	6.78367	1.41864	7.48487	4.93086	8.06725	4.85957	7.8065	5.14588	0.0233016	0.225263
ENSG00000115289	polycomb group ring finger 1 [Source:HGNC Symbol;Acc:17615]	PCGF1	protein_coding	4.70393	4.36559	2.44012	1.29189	4.71903	1.41726	4.66535	1.35011	5.14261	0.0233456	0.225263
ENSG00000100031	gamma-glutamyltransferase 1 [Source:HGNC Symbol;Acc:4250]	GGT1	protein_coding	-4.7034	4.85254	2.0036	4.92054	1.75284	6.76619	1.75699	6.13455	5.14062	0.0233722	0.225263
ENSG00000161048	N-acyl phosphatidylethanolamine phospholipase D [Source:HGNC Symbol;Acc:21683]	NAPEPLD	protein_coding	3.70305	4.52604	1.41864	1.26367	4.96546	2.02723	4.89829	1.66846	5.13752	0.0234141	0.225263
ENSG00000119596	YLP motif containing 1 [Source:HGNC Symbol;Acc:17798]	YLPM1	protein_coding	5.96292	5.82411	8.6901	5.31629	5.6519	1.48706	6.14023	4.5036	5.13724	0.0234178	0.225263
ENSG00000172687	zinc finger protein 738 [Source:HGNC Symbol;Acc:32469]	ZNF738	protein_coding	-1.89528	4.97112	4.46303	5.64316	3.69878	6.33942	3.73528	6.00014	5.13679	0.0234239	0.225263
ENSG00000170581	signal transducer and activator of transcription 2, 113kDa [Source:HGNC Symbol;Acc:11363]	STAT2	protein_coding	-2.30309	7.44292	1.41864	8.11657	6.11334	8.41576	6.032	8.27405	5.13638	0.0234294	0.225263
ENSG00000073350	lethal giant larvae homolog 2 (Drosophila) [Source:HGNC Symbol;Acc:6629]	LLGL2	protein_coding	1.86727	6.31069	10.7528	5.65246	4.64676	4.62749	6.9811	5.23842	5.13016	0.0235135	0.225263
ENSG00000109854	HIV-1 Tat interactive protein 2, 30kDa [Source:HGNC Symbol;Acc:16637]	HTATIP2	protein_coding	5.95176	5.88565	1.41864	5.66201	6.2297	1.66401	6.14828	4.81063	5.12549	0.0235769	0.225263
ENSG00000119950	MAX interactor 1, dimerization protein [Source:HGNC Symbol;Acc:7534]	MXI1	protein_coding	7.25929	3.61506	1.41864	4.35408	3.82449	0.64477	3.7735	3.40007	5.12546	0.0235774	0.225263
ENSG00000185215	tumor necrosis factor, alpha-induced protein 2 [Source:HGNC Symbol;Acc:11895]	TNFAIP2	protein_coding	-4.84784	9.38317	1.41864	12.0718	4.57794	9.95181	4.51996	11.3709	5.12246	0.0236181	0.225263
ENSG00000172037	laminin, beta 2 (laminin S) [Source:HGNC Symbol;Acc:6487]	LAMB2	protein_coding	6.63109	4.56954	1.41864	5.67085	4.37773	0.755588	4.31847	4.71358	5.12246	0.0236181	0.225263
ENSG00000080815	presenilin 1 [Source:HGNC Symbol;Acc:9508]	PSEN1	protein_coding	-3.19116	6.12513	1.41864	3.89477	4.66523	8.34523	4.60411	7.34742	5.12191	0.0236255	0.225263
ENSG00000111371	solute carrier family 38, member 1 [Source:HGNC Symbol;Acc:13447]	SLC38A1	protein_coding	3.23428	6.38695	4.33893	6.54224	6.75491	4.15182	6.68387	5.81149	5.12164	0.0236292	0.225263
ENSG00000060688	small nuclear ribonucleoprotein 40kDa (U5) [Source:HGNC Symbol;Acc:30857]	SNRNP40	protein_coding	-3.66472	4.49065	1.41864	7.17122	1.06695	4.43503	1.07378	6.33862	5.12107	0.023637	0.225263
ENSG00000136848	DAB2 interacting protein [Source:HGNC Symbol;Acc:17294]	DAB2IP	protein_coding	-3.16736	3.06806	1.41864	4.14896	1.3499	4.02267	1.34778	4.0915	5.11947	0.0236589	0.225263
ENSG00000108010	glutaredoxin 3 [Source:HGNC Symbol;Acc:15987]	GLRX3	protein_coding	3.8626	6.57361	1.41864	6.01747	6.93118	3.87363	6.84529	5.301	5.11362	0.0237388	0.225539
ENSG00000151364	potassium channel tetramerization domain containing 14 [Source:HGNC Symbol;Acc:23295]	KCTD14	protein_coding	8.39658	4.32787	1.41864	1.0414	4.7697	0.64477	4.70388	0.867831	5.11243	0.0237551	0.225539
ENSG00000143190	POU class 2 homeobox 1 [Source:HGNC Symbol;Acc:9212]	POU2F1	protein_coding	2.94021	5.90098	10.1994	5.8356	4.12281	2.48624	6.38863	4.9607	5.10958	0.0237941	0.225558
ENSG00000170542	serpin peptidase inhibitor, clade B (ovalbumin), member 9 [Source:HGNC Symbol;Acc:8955]	SERPINB9	protein_coding	-2.2201	6.3976	8.80485	7.03649	3.70442	7.84621	5.15679	7.48764	5.10737	0.0238244	0.225558
ENSG00000261474		RP11-452L6.1	lincRNA	-4.51961	3.80008	1.41864	4.09878	1.1995	5.85516	1.20206	5.25422	5.09819	0.0239509	0.22607
ENSG00000231500	ribosomal protein S18 [Source:HGNC Symbol;Acc:10401]	RPS18	protein_coding	1.47849	10.6934	9.5633	8.93099	10.9287	9.94137	10.8691	9.52262	5.09765	0.0239582	0.22607
ENSG00000052795	folliculin interacting protein 2 [Source:HGNC Symbol;Acc:29280]	FNIP2	protein_coding	3.91834	8.80549	1.41864	4.24228	9.39691	6.01928	9.2998	5.3967	5.09611	0.0239796	0.22607
ENSG00000140299	BCL2/adenovirus E1B 19kDa interacting protein 2 [Source:HGNC Symbol;Acc:1083]	BNIP2	protein_coding	4.64676	5.55489	2.12351	6.97764	5.60101	1.48986	5.52888	6.05353	5.08892	0.0240792	0.226689
ENSG00000133961	numb homolog (Drosophila) [Source:HGNC Symbol;Acc:8060]	NUMB	protein_coding	-1.89018	6.57976	5.88983	7.1014	5.28932	8.26124	5.32562	7.78186	5.085	0.0241336	0.226883
ENSG00000159111	mitochondrial ribosomal protein L10 [Source:HGNC Symbol;Acc:14055]	MRPL10	protein_coding	4.40125	5.37033	4.25658	4.01698	5.907	2.45845	5.84844	3.46049	5.08143	0.0241834	0.227032
ENSG00000184009	actin, gamma 1 [Source:HGNC Symbol;Acc:144]	ACTG1	protein_coding	1.98882	13.1978	9.00435	11.3683	13.5865	11.9961	13.4914	11.7159	5.07221	0.0243124	0.227924
ENSG00000064651	solute carrier family 12 (sodium/potassium/chloride transporter), member 2 [Source:HGNC Symbol;Acc:10911]	SLC12A2	protein_coding	-2.71795	7.64455	1.8137	9.45636	5.10639	8.03464	5.03878	8.91764	5.0688	0.0243602	0.228054
ENSG00000119650	intraflagellar transport 43 homolog (Chlamydomonas) [Source:HGNC Symbol;Acc:29669]	IFT43	protein_coding	-3.87752	3.59663	1.41864	5.61084	1.00875	4.65738	1.01766	5.21194	5.06352	0.0244345	0.228431
ENSG00000170456	DENN/MADD domain containing 5B [Source:HGNC Symbol;Acc:28338]	DENND5B	protein_coding	3.50292	3.34828	1.41864	0.714051	3.81818	1.58926	3.76735	1.18522	5.06083	0.0244725	0.228467
ENSG00000180304	ornithine decarboxylase antizyme 2 [Source:HGNC Symbol;Acc:8096]	OAZ2	protein_coding	-1.84786	6.41366	5.3047	7.7822	4.85597	7.27671	4.87951	7.54847	5.05043	0.0246198	0.229449
ENSG00000159086	PAX3 and PAX7 binding protein 1 [Source:HGNC Symbol;Acc:13579]	PAXBP1	protein_coding	2.96037	4.83855	5.11908	1.81325	5.42857	3.32196	5.41241	2.74148	5.04857	0.0246462	0.229449
ENSG00000156413	fucosyltransferase 6 (alpha (1,3) fucosyltransferase) [Source:HGNC Symbol;Acc:4017]	FUT6	protein_coding	-2.27088	3.87088	2.90407	6.01779	1.57846	4.0025	1.63904	5.33354	5.03858	0.0247888	0.230239
ENSG00000139350	neural precursor cell expressed, developmentally down-regulated 1 [Source:HGNC Symbol;Acc:7723]	NEDD1	protein_coding	8.6602	4.71898	1.41864	4.56172	5.02119	0.64477	4.95542	3.59593	5.03781	0.0247998	0.230239
ENSG00000150526	melanoma inhibitory activity 2 [Source:HGNC Symbol;Acc:18432]	MIA2	protein_coding	-5.10574	5.9731	1.41864	1.92877	2.33482	8.27958	2.30666	7.30736	5.03398	0.0248548	0.230262
ENSG00000128159	tubulin, gamma complex associated protein 6 [Source:HGNC Symbol;Acc:18127]	TUBGCP6	protein_coding	-1.58236	4.37705	2.37097	4.85648	3.47772	5.70231	3.44358	5.34168	5.03285	0.0248709	0.230262
ENSG00000147853	adenylate kinase 3 [Source:HGNC Symbol;Acc:17376]	AK3	protein_coding	-3.01672	5.65132	1.41864	5.88743	3.76486	7.04996	3.7161	6.57731	5.01871	0.0250749	0.23183
ENSG00000205339	importin 7 [Source:HGNC Symbol;Acc:9852]	IPO7	protein_coding	3.88573	6.6786	1.41864	7.75902	6.71337	3.57048	6.62824	6.8599	5.00742	0.0252389	0.232888
ENSG00000165660	family with sequence similarity 175, member B [Source:HGNC Symbol;Acc:28975]	FAM175B	protein_coding	8.67017	5.3849	1.41864	6.44888	5.25703	0.64477	5.18214	5.56601	5.00604	0.0252591	0.232888
ENSG00000138942	ring finger protein 185 [Source:HGNC Symbol;Acc:26783]	RNF185	protein_coding	7.74883	4.7961	1.41864	0.690165	5.36579	0.762462	5.29452	0.72127	4.99764	0.0253819	0.232888
ENSG00000141552	anaphase promoting complex subunit 11 [Source:HGNC Symbol;Acc:14452]	ANAPC11	protein_coding	2.03728	6.1292	9.32252	5.93098	5.82624	4.9646	6.49508	5.52744	4.99675	0.025395	0.232888
ENSG00000102178	ubiquitin-like 4A [Source:HGNC Symbol;Acc:12505]	UBL4A	protein_coding	8.18931	4.14043	1.41864	1.36038	4.47818	0.64477	4.42049	1.07974	4.99654	0.025398	0.232888
ENSG00000133026	myosin, heavy chain 10, non-muscle [Source:HGNC Symbol;Acc:7568]	MYH10	protein_coding	5.77313	3.31634	2.0036	4.95212	2.42092	0.64477	2.40527	4.08649	4.99425	0.0254317	0.232888
ENSG00000167014	chromosome 15 open reading frame 43 [Source:HGNC Symbol;Acc:28520]	C15orf43	protein_coding	-1.46365	2.91059	4.55122	3.4058	1.54564	4.09438	1.81987	3.78508	4.99419	0.0254325	0.232888
ENSG00000138398	peptidylprolyl isomerase G (cyclophilin G) [Source:HGNC Symbol;Acc:14650]	PPIG	protein_coding	-2.1643	8.0842	5.37284	8.66472	6.55276	9.20167	6.50466	8.95379	4.9917	0.0254691	0.232905
ENSG00000171992	synaptopodin [Source:HGNC Symbol;Acc:30672]	SYNPO	protein_coding	-4.03916	3.97513	1.41864	5.62936	1.35849	5.62026	1.35615	5.62474	4.97778	0.025675	0.234468
ENSG00000163660	cyclin L1 [Source:HGNC Symbol;Acc:20569]	CCNL1	protein_coding	-2.30611	7.95044	2.41864	7.86857	6.87013	9.23994	6.78609	8.71576	4.97126	0.0257718	0.235032
ENSG00000085274	myoneurin [Source:HGNC Symbol;Acc:14955]	MYNN	protein_coding	7.17089	5.58103	1.41864	6.62539	5.79641	0.966062	5.72142	5.69046	4.96466	0.0258703	0.23561
ENSG00000103353	ubiquitin family domain containing 1 [Source:HGNC Symbol;Acc:30565]	UBFD1	protein_coding	5.16186	5.61936	2.0084	5.16793	5.63106	1.91232	5.55837	4.37002	4.96226	0.0259063	0.235617
ENSG00000106415	glucocorticoid induced transcript 1 [Source:HGNC Symbol;Acc:18713]	GLCCI1	protein_coding	6.7923	2.98475	1.41864	2.16902	3.21558	0.64477	3.17429	1.66394	4.95661	0.0259911	0.236068
ENSG00000165572	kelch repeat and BTB (POZ) domain containing 6 [Source:HGNC Symbol;Acc:25340]	KBTBD6	protein_coding	-1.33407	3.40917	4.88983	4.96514	1.90085	3.96075	2.18374	4.55962	4.95212	0.0260587	0.236362
ENSG00000179918	selenophosphate synthetase 2 [Source:HGNC Symbol;Acc:19686]	SEPHS2	protein_coding	-3.1894	6.23968	1.41864	5.56056	4.5581	8.25718	4.49817	7.45319	4.94634	0.0261459	0.236832
ENSG00000119707	RNA binding motif protein 25 [Source:HGNC Symbol;Acc:23244]	RBM25	protein_coding	-1.86258	8.01302	4.11908	7.54886	7.06954	9.4267	6.99209	8.77524	4.94344	0.0261899	0.236911
ENSG00000133112	tumor protein, translationally-controlled 1 [Source:HGNC Symbol;Acc:12022]	TPT1	protein_coding	1.57273	10.6564	7.02523	9.21189	10.9313	9.88065	10.8394	9.5844	4.93893	0.0262583	0.23705
ENSG00000082512	TNF receptor-associated factor 5 [Source:HGNC Symbol;Acc:12035]	TRAF5	protein_coding	4.26291	4.44628	1.41864	2.23657	4.74258	1.83182	4.67962	2.04864	4.93777	0.026276	0.23705
ENSG00000213853	epithelial membrane protein 2 [Source:HGNC Symbol;Acc:3334]	EMP2	protein_coding	-1.73549	6.44689	6.02271	5.52685	5.18265	8.74977	5.23718	7.88781	4.92822	0.0264214	0.237947
ENSG00000189114	biogenesis of lysosomal organelles complex-1, subunit 3 [Source:HGNC Symbol;Acc:20914]	BLOC1S3	protein_coding	5.28652	6.05676	6.59177	7.42913	5.92864	2.04145	5.97219	6.45566	4.92659	0.0264464	0.237947
ENSG00000100445	short chain dehydrogenase/reductase family 39U, member 1 [Source:HGNC Symbol;Acc:20275]	SDR39U1	protein_coding	6.59994	3.70126	1.41864	1.99849	4.00358	0.751021	3.94995	1.53366	4.91306	0.0266544	0.239496
ENSG00000213648	sulfotransferase family, cytosolic, 1A, phenol-preferring, member 4 [Source:HGNC Symbol;Acc:30004]	SULT1A4	protein_coding	-2.41058	3.28169	5.16011	5.02356	0.875426	4.05276	1.49635	4.63467	4.9086	0.0267233	0.239778
ENSG00000074755	zinc finger, ZZ-type with EF-hand domain 1 [Source:HGNC Symbol;Acc:29027]	ZZEF1	protein_coding	-1.71839	4.76059	4.96399	4.1183	3.57922	6.48763	3.66785	5.71082	4.90641	0.0267572	0.239778
ENSG00000163596	islet cell autoantigen 1,69kDa-like [Source:HGNC Symbol;Acc:14442]	ICA1L	protein_coding	-1.75786	5.1008	4.1778	6.26734	3.8144	6.50302	3.82916	6.38872	4.90367	0.0267997	0.239838
ENSG00000100372	solute carrier family 25 (mitochondrial carrier; peroxisomal membrane protein, 34kDa), member 17 [Source:HGNC Symbol;Acc:10987]	SLC25A17	protein_coding	6.87587	5.00823	1.41864	3.03656	5.57947	0.973206	5.50445	2.33423	4.89797	0.0268883	0.240005
ENSG00000177426	TGFB-induced factor homeobox 1 [Source:HGNC Symbol;Acc:11776]	TGIF1	protein_coding	4.8586	5.54443	1.41864	5.80546	5.90872	1.96744	5.83189	4.94512	4.89786	0.02689	0.240005
ENSG00000173875	zinc finger protein 791 [Source:HGNC Symbol;Acc:26895]	ZNF791	protein_coding	2.73741	6.51553	6.92643	6.25367	6.73605	4.57299	6.74711	5.64549	4.89485	0.0269369	0.240104
ENSG00000104368	plasminogen activator, tissue [Source:HGNC Symbol;Acc:9051]	PLAT	protein_coding	1.92176	7.29569	12.0167	5.57805	5.15829	5.49195	8.21568	5.53528	4.8898	0.0270158	0.240465
ENSG00000154734	ADAM metallopeptidase with thrombospondin type 1 motif, 1 [Source:HGNC Symbol;Acc:217]	ADAMTS1	protein_coding	4.89479	6.6463	1.57568	2.49826	7.11273	3.10195	7.0258	2.80953	4.88731	0.0270548	0.240465
ENSG00000152818	utrophin [Source:HGNC Symbol;Acc:12635]	UTRN	protein_coding	7.57025	6.59815	1.41864	6.0022	6.85967	1.24001	6.77379	5.15567	4.88538	0.0270851	0.240465
ENSG00000096872	intraflagellar transport 74 homolog (Chlamydomonas) [Source:HGNC Symbol;Acc:21424]	IFT74	protein_coding	-4.78547	5.00949	8.33165	5.62104	0.487207	6.65684	3.84492	6.24421	4.88233	0.027133	0.240572
ENSG00000138119	myoferlin [Source:HGNC Symbol;Acc:3656]	MYOF	protein_coding	-3.64094	5.58953	1.41864	6.68412	3.44567	7.23454	3.40005	6.9872	4.87302	0.0272798	0.241554
ENSG00000165487	mitochondrial calcium uptake 2 [Source:HGNC Symbol;Acc:31830]	MICU2	protein_coding	-2.74221	4.71045	1.41864	3.31158	3.40337	6.28863	3.35618	5.47152	4.86778	0.0273626	0.241952
ENSG00000003056	mannose-6-phosphate receptor (cation dependent) [Source:HGNC Symbol;Acc:6752]	M6PR	protein_coding	-2.50117	6.93802	1.41864	4.73481	5.91137	8.94271	5.83349	7.98606	4.86487	0.0274088	0.241952
ENSG00000158987	Rap guanine nucleotide exchange factor (GEF) 6 [Source:HGNC Symbol;Acc:20655]	RAPGEF6	protein_coding	2.00507	4.50032	6.38327	4.06697	4.91628	3.41795	5.03477	3.78034	4.86335	0.027433	0.241952
ENSG00000124107	secretory leukocyte peptidase inhibitor [Source:HGNC Symbol;Acc:11092]	SLPI	protein_coding	-4.817	7.24325	1.41864	7.74499	3.88125	8.88105	3.83084	8.41852	4.86013	0.0274843	0.242086
ENSG00000198453	zinc finger protein 568 [Source:HGNC Symbol;Acc:25392]	ZNF568	protein_coding	-2.12025	3.63732	1.41864	5.02403	2.28851	5.02919	2.26364	5.02608	4.85725	0.0275301	0.242116
ENSG00000166503	Hepatoma-derived growth factor-related protein 3 [Source:UniProtKB/Swiss-Prot;Acc:Q9Y3E1]	HDGFRP3	protein_coding	-4.20176	3.482	1.41864	2.30899	1.61599	5.64929	1.60639	4.81271	4.85538	0.02756	0.242116
ENSG00000114735	HemK methyltransferase family member 1 [Source:HGNC Symbol;Acc:24923]	HEMK1	protein_coding	2.80994	3.35444	1.86754	0.655043	3.64219	2.09952	3.59962	1.49146	4.84849	0.0276704	0.242768
ENSG00000111530	cullin-associated and neddylation-dissociated 1 [Source:HGNC Symbol;Acc:30688]	CAND1	protein_coding	-2.02134	6.77001	8.86125	7.13744	4.66685	8.21852	5.60583	7.7772	4.84583	0.027713	0.242824
ENSG00000156504	family with sequence similarity 122B [Source:HGNC Symbol;Acc:30490]	FAM122B	protein_coding	-3.6936	4.02709	1.41864	4.09735	2.06078	5.76649	2.04127	5.14255	4.8371	0.0278536	0.243738
ENSG00000100600	legumain [Source:HGNC Symbol;Acc:9472]	LGMN	protein_coding	-1.65299	6.17126	6.46805	6.79152	4.96041	7.85209	5.09209	7.40096	4.83304	0.0279193	0.243994
ENSG00000145191	eukaryotic translation initiation factor 2B, subunit 5 epsilon, 82kDa [Source:HGNC Symbol;Acc:3261]	EIF2B5	protein_coding	7.28169	4.89531	1.41864	6.47319	4.82244	0.755588	4.74846	5.48987	4.82808	0.0279998	0.244378
ENSG00000120699	exosome component 8 [Source:HGNC Symbol;Acc:17035]	EXOSC8	protein_coding	-2.24507	7.23321	3.25658	6.65065	6.25474	8.53793	6.18187	7.89699	4.81863	0.0281538	0.245403
ENSG00000180398	multiple coagulation factor deficiency 2 [Source:HGNC Symbol;Acc:18451]	MCFD2	protein_coding	2.14436	7.16813	6.44345	6.3553	7.41593	6.00913	7.37165	6.19584	4.8127	0.0282507	0.245613
ENSG00000176485	phospholipase A2, group XVI [Source:HGNC Symbol;Acc:17825]	PLA2G16	protein_coding	-2.03698	5.15411	3.58214	3.39463	3.7564	6.78545	3.74676	5.94816	4.81267	0.0282512	0.245613
ENSG00000197579	topoisomerase I binding, arginine/serine-rich, E3 ubiquitin protein ligase [Source:HGNC Symbol;Acc:21653]	TOPORS	protein_coding	5.99474	5.31854	5.32553	3.03823	5.54931	1.39822	5.53706	2.47752	4.80048	0.0284518	0.246874
ENSG00000178764	zinc fingers and homeoboxes 2 [Source:HGNC Symbol;Acc:18513]	ZHX2	protein_coding	-4.97918	5.13474	1.41864	5.86651	1.83837	6.6133	1.823	6.27036	4.79938	0.0284699	0.246874
ENSG00000232098		CTD-2619J13.14	lincRNA	3.03946	3.34809	5.91113	1.53203	3.47514	2.42325	3.70072	2.03821	4.79625	0.0285217	0.246944
ENSG00000175352	nuclear receptor interacting protein 3 [Source:HGNC Symbol;Acc:1167]	NRIP3	protein_coding	-1.63285	3.7102	2.1628	5.19292	2.45675	4.52869	2.44424	4.90246	4.79445	0.0285516	0.246944
ENSG00000248223		CTD-2139B15.2	lincRNA	2.14254	3.48012	3.99274	1.85133	3.65196	2.42821	3.66415	2.15854	4.78809	0.0286571	0.247537
ENSG00000180104	exocyst complex component 3 [Source:HGNC Symbol;Acc:30378]	EXOC3	protein_coding	6.86909	5.89913	9.76737	5.7516	4.99735	0.865351	6.3053	4.9373	4.78215	0.0287563	0.247898
ENSG00000204308	ring finger protein 5, E3 ubiquitin protein ligase [Source:HGNC Symbol;Acc:10068]	RNF5	protein_coding	6.30025	4.12725	1.41864	2.67731	4.653	0.874039	4.59018	2.09467	4.78115	0.0287729	0.247898
ENSG00000144736	SHQ1, H/ACA ribonucleoprotein assembly factor [Source:HGNC Symbol;Acc:25543]	SHQ1	protein_coding	-2.16977	3.09355	1.41864	3.78748	1.97321	4.3634	1.95495	4.10964	4.77591	0.0288605	0.248227
ENSG00000105223	phospholipase D family, member 3 [Source:HGNC Symbol;Acc:17158]	PLD3	protein_coding	1.93189	4.87656	8.75751	5.36277	3.90679	3.42582	5.15205	4.68637	4.77444	0.0288852	0.248227
ENSG00000162623	tRNA-yW synthesizing protein 3 homolog (S. cerevisiae) [Source:HGNC Symbol;Acc:24757]	TYW3	protein_coding	5.0023	4.73312	1.41864	6.52624	4.55942	1.31314	4.49942	5.51152	4.76953	0.0289677	0.248618
ENSG00000138641	HECT and RLD domain containing E3 ubiquitin protein ligase 3 [Source:HGNC Symbol;Acc:4876]	HERC3	protein_coding	4.94719	5.61825	5.0036	2.20698	5.91443	2.45147	5.8762	2.32656	4.76652	0.0290184	0.248735
ENSG00000188846	ribosomal protein L14 [Source:HGNC Symbol;Acc:10305]	RPL14	protein_coding	1.46509	9.56676	9.36408	8.54831	9.73565	8.93982	9.71392	8.75668	4.75813	0.0291603	0.249094
ENSG00000066468	fibroblast growth factor receptor 2 [Source:HGNC Symbol;Acc:3689]	FGFR2	protein_coding	-3.28118	3.38402	1.41864	5.755	0.798915	2.96605	0.815608	4.94716	4.75769	0.0291677	0.249094
ENSG00000172765	transmembrane and coiled-coil domain family 1 [Source:HGNC Symbol;Acc:29116]	TMCC1	protein_coding	-4.26889	5.14485	1.41864	7.79047	1.91791	5.46795	1.90093	7.03041	4.75678	0.0291831	0.249094
ENSG00000167548	lysine (K)-specific methyltransferase 2D [Source:HGNC Symbol;Acc:7133]	KMT2D	protein_coding	-1.96812	4.02489	4.60054	5.12811	2.41012	5.47493	2.57175	5.31033	4.75526	0.029209	0.249094
ENSG00000162813	3'(2'), 5'-bisphosphate nucleotidase 1 [Source:HGNC Symbol;Acc:1096]	BPNT1	protein_coding	-1.81974	5.2047	3.19685	4.79674	4.29059	6.70342	4.25324	6.08589	4.75	0.0292983	0.249538
ENSG00000134982	adenomatous polyposis coli [Source:HGNC Symbol;Acc:583]	APC	protein_coding	-3.37837	4.11812	1.41864	4.5371	2.48498	5.84058	2.45632	5.27244	4.74469	0.0293889	0.249632
ENSG00000111266	dual specificity phosphatase 16 [Source:HGNC Symbol;Acc:17909]	DUSP16	protein_coding	5.43419	3.40128	1.41864	4.22672	3.19083	0.762462	3.15192	3.46545	4.74268	0.0294232	0.249632
ENSG00000170788	DPY30 domain containing 1 [Source:HGNC Symbol;Acc:23460]	DYDC1	protein_coding	-1.72646	3.05802	1.41864	3.08911	2.28613	4.34812	2.26082	3.81006	4.74088	0.029454	0.249632
ENSG00000119321	FK506 binding protein 15, 133kDa [Source:HGNC Symbol;Acc:23397]	FKBP15	protein_coding	6.12283	3.84354	2.41864	2.80788	4.43381	0.866752	4.38267	2.24935	4.74063	0.0294583	0.249632
ENSG00000135452	tetraspanin 31 [Source:HGNC Symbol;Acc:10539]	TSPAN31	protein_coding	2.66451	6.31857	2.433	7.45162	6.34038	4.21647	6.25988	6.60192	4.73556	0.0295452	0.250052
ENSG00000133678	transmembrane protein 254 [Source:HGNC Symbol;Acc:25804]	TMEM254	protein_coding	5.66633	4.07121	1.41864	0.353986	4.46602	1.05825	4.40704	0.718847	4.72656	0.0297002	0.250734
ENSG00000134258	V-set domain containing T cell activation inhibitor 1 [Source:HGNC Symbol;Acc:28873]	VTCN1	protein_coding	-1.93682	6.00965	1.41864	8.40286	-0.0931393	0.762462	-0.0292957	7.44134	4.72654	0.0297005	0.250734
ENSG00000147852	very low density lipoprotein receptor [Source:HGNC Symbol;Acc:12698]	VLDLR	protein_coding	8.51564	5.46138	1.41864	2.52488	5.80141	0.760049	5.72626	1.89643	4.72108	0.0297951	0.251216
ENSG00000026025	vimentin [Source:HGNC Symbol;Acc:12692]	VIM	protein_coding	3.12515	8.6185	9.05888	7.34041	8.8038	6.34213	8.82143	6.93539	4.71574	0.0298878	0.251524
ENSG00000143324	xenotropic and polytropic retrovirus receptor 1 [Source:HGNC Symbol;Acc:12827]	XPR1	protein_coding	2.19845	5.59732	4.71583	5.39789	5.91936	4.09304	5.87285	4.91763	4.71465	0.0299067	0.251524
ENSG00000104213	platelet-derived growth factor receptor-like [Source:HGNC Symbol;Acc:8805]	PDGFRL	protein_coding	3.42173	4.49122	1.41864	3.30687	4.77595	2.23341	4.71149	2.88688	4.707	0.0300401	0.252329
ENSG00000135540	NHS-like 1 [Source:HGNC Symbol;Acc:21021]	NHSL1	protein_coding	-2.60809	4.976	1.41864	7.27024	0.889905	3.27811	0.903445	6.36557	4.70096	0.0301457	0.252485
ENSG00000135486	heterogeneous nuclear ribonucleoprotein A1 [Source:HGNC Symbol;Acc:5031]	HNRNPA1	protein_coding	1.99493	9.96532	5.0036	9.07726	10.2446	8.87051	10.1491	8.97828	4.70048	0.0301542	0.252485
ENSG00000260072		CTD-2313J23.1	lincRNA	-1.38578	3.81129	4.26764	4.41698	2.8519	4.97768	2.93172	4.71768	4.69948	0.0301717	0.252485
ENSG00000115816	CCAAT/enhancer binding protein (C/EBP), zeta [Source:HGNC Symbol;Acc:24218]	CEBPZ	protein_coding	2.65343	6.69976	5.17353	5.8877	7.07111	5.10029	7.00401	5.57373	4.69653	0.0302235	0.252604
ENSG00000104408	eukaryotic translation initiation factor 3, subunit E [Source:HGNC Symbol;Acc:3277]	EIF3E	protein_coding	1.94912	8.58314	7.01543	7.84089	8.84884	7.35596	8.78023	7.61839	4.67112	0.030674	0.256049
ENSG00000054116	trafficking protein particle complex 3 [Source:HGNC Symbol;Acc:19942]	TRAPPC3	protein_coding	6.09074	5.04641	1.41864	4.91711	5.10347	0.984728	5.03613	3.93132	4.66302	0.030819	0.256237
ENSG00000081760	acetoacetyl-CoA synthetase [Source:HGNC Symbol;Acc:21298]	AACS	protein_coding	-1.52067	5.56099	5.30811	6.96099	4.37168	6.56516	4.42947	6.77311	4.66197	0.0308378	0.256237
ENSG00000003509	NADH dehydrogenase (ubiquinone) complex I, assembly factor 7 [Source:HGNC Symbol;Acc:28816]	NDUFAF7	protein_coding	4.2213	5.91429	1.41864	6.64324	5.69123	2.56815	5.61511	5.79734	4.66139	0.0308481	0.256237
ENSG00000110492	midkine (neurite growth-promoting factor 2) [Source:HGNC Symbol;Acc:6972]	MDK	protein_coding	-5.08342	4.89936	1.41864	5.39518	2.0026	7.22085	1.98415	6.54825	4.66061	0.0308622	0.256237
ENSG00000110719	T-cell, immune regulator 1, ATPase, H+ transporting, lysosomal V0 subunit A3 [Source:HGNC Symbol;Acc:11647]	TCIRG1	protein_coding	3.76395	4.21105	3.74057	0.733945	4.82447	2.57409	4.78705	1.89884	4.6592	0.0308876	0.256237
ENSG00000141510	tumor protein p53 [Source:HGNC Symbol;Acc:11998]	TP53	protein_coding	-2.043	6.35364	3.0012	7.70978	4.09617	6.54687	4.06129	7.24389	4.65305	0.0309983	0.256838
ENSG00000143353	lysophospholipase-like 1 [Source:HGNC Symbol;Acc:20440]	LYPLAL1	protein_coding	5.18694	5.53127	1.41864	5.03772	5.69502	1.93456	5.61869	4.25058	4.64955	0.0310616	0.257045
ENSG00000128626	mitochondrial ribosomal protein S12 [Source:HGNC Symbol;Acc:10380]	MRPS12	protein_coding	5.32082	5.08332	2.38949	3.59798	5.65026	1.64544	5.5717	3.04068	4.64056	0.0312247	0.258076
ENSG00000020922	MRE11 meiotic recombination 11 homolog A (S. cerevisiae) [Source:HGNC Symbol;Acc:7230]	MRE11A	protein_coding	5.14925	5.51748	1.41864	2.4525	6.16128	1.9586	6.0789	2.23846	4.63548	0.0313173	0.258522
ENSG00000128891	chromosome 15 open reading frame 57 [Source:HGNC Symbol;Acc:28295]	C15orf57	protein_coding	2.89833	5.75319	4.40778	5.52231	5.97128	3.46823	5.91696	4.92355	4.62922	0.0314318	0.259043
ENSG00000167323	stromal interaction molecule 1 [Source:HGNC Symbol;Acc:11386]	STIM1	protein_coding	5.35782	3.8504	1.41864	3.0561	4.2576	1.05893	4.20163	2.48327	4.62781	0.0314577	0.259043
ENSG00000100065	caspase recruitment domain family, member 10 [Source:HGNC Symbol;Acc:16422]	CARD10	protein_coding	-4.5237	5.90796	1.41864	2.33982	3.51157	8.468	3.46749	7.47779	4.62538	0.0315023	0.259092
ENSG00000037637	F-box protein 42 [Source:HGNC Symbol;Acc:29249]	FBXO42	protein_coding	3.06179	5.49529	5.07055	4.85858	5.6101	3.49738	5.58516	4.35695	4.61494	0.0316947	0.260196
ENSG00000135924	DnaJ (Hsp40) homolog, subfamily B, member 2 [Source:HGNC Symbol;Acc:5228]	DNAJB2	protein_coding	5.89065	3.35367	1.41864	2.26026	3.68788	0.759341	3.637	1.74924	4.61388	0.0317142	0.260196
ENSG00000005100	DEAH (Asp-Glu-Ala-His) box polypeptide 33 [Source:HGNC Symbol;Acc:16718]	DHX33	protein_coding	5.17399	4.87951	2.41864	4.60052	5.41425	1.24315	5.34534	3.873	4.60988	0.0317883	0.260485
ENSG00000158158	cyclin M4 [Source:HGNC Symbol;Acc:105]	CNNM4	protein_coding	8.45512	4.35465	1.41864	0.569763	4.82345	0.64477	4.75014	0.601872	4.60257	0.031924	0.26114
ENSG00000135480	keratin 7 [Source:HGNC Symbol;Acc:6445]	KRT7	protein_coding	-2.44423	8.65871	2.0036	9.86373	6.78241	9.41995	6.69764	9.65809	4.60138	0.0319462	0.26114
ENSG00000172590	mitochondrial ribosomal protein L52 [Source:HGNC Symbol;Acc:16655]	MRPL52	protein_coding	-1.88503	4.73868	3.4419	5.91717	3.20088	5.64773	3.20716	5.79437	4.59906	0.0319895	0.261176
ENSG00000108094	cullin 2 [Source:HGNC Symbol;Acc:2552]	CUL2	protein_coding	4.81189	5.12425	1.41864	6.31035	4.9785	1.6749	4.91234	5.43561	4.59686	0.0320305	0.261193
ENSG00000100938	guanosine monophosphate reductase 2 [Source:HGNC Symbol;Acc:4377]	GMPR2	protein_coding	-3.95579	5.8604	1.41864	5.5733	3.82164	8.07977	3.7721	7.31114	4.59084	0.0321433	0.261794
ENSG00000105879	Cbl proto-oncogene-like 1, E3 ubiquitin protein ligase [Source:HGNC Symbol;Acc:21225]	CBLL1	protein_coding	-3.34916	3.33277	1.41864	3.2165	1.77389	5.57637	1.76044	4.75754	4.57942	0.0323582	0.263224
ENSG00000185044		RP11-435B5.4	lincRNA	3.19312	4.67814	8.88327	2.29094	4.18458	3.16212	5.37264	2.75238	4.55877	0.0327505	0.266093
ENSG00000109685	Wolf-Hirschhorn syndrome candidate 1 [Source:HGNC Symbol;Acc:12766]	WHSC1	protein_coding	3.79196	5.40546	2.04157	6.55942	5.59788	2.42239	5.52373	5.67158	4.5518	0.0328841	0.266763
ENSG00000005801	zinc finger protein 195 [Source:HGNC Symbol;Acc:12986]	ZNF195	protein_coding	-2.21016	5.35176	4.24747	6.70786	3.40187	6.07635	3.44273	6.42726	4.55032	0.0329125	0.266763
ENSG00000213096	zinc finger protein 254 [Source:HGNC Symbol;Acc:13047]	ZNF254	protein_coding	-2.44055	5.81205	2.91689	1.97974	4.03633	7.52463	3.99843	6.5759	4.53232	0.0332605	0.269257
ENSG00000149089	APAF1 interacting protein [Source:HGNC Symbol;Acc:17581]	APIP	protein_coding	-2.9384	4.99593	1.41864	4.62064	3.82915	6.822	3.77937	6.12221	4.52871	0.0333308	0.26938
ENSG00000017260	ATPase, Ca++ transporting, type 2C, member 1 [Source:HGNC Symbol;Acc:13211]	ATP2C1	protein_coding	-2.64601	6.51798	1.41864	5.8821	5.14865	8.53513	5.07995	7.73782	4.52741	0.033356	0.26938
ENSG00000162614	nexilin (F actin binding protein) [Source:HGNC Symbol;Acc:29557]	NEXN	protein_coding	2.98839	4.91775	7.98088	2.53248	5.07435	3.7823	5.49326	3.23993	4.52318	0.0334386	0.269722
ENSG00000198106	sorting nexin 29 pseudogene 2 [Source:HGNC Symbol;Acc:31914]	SNX29P2	lincRNA	-1.83935	4.55209	5.27264	4.99468	2.95255	6.10968	3.15399	5.66092	4.52067	0.0334878	0.269794
ENSG00000166411	isocitrate dehydrogenase 3 (NAD+) alpha [Source:HGNC Symbol;Acc:5384]	IDH3A	protein_coding	2.64374	5.03349	4.93213	4.014	5.51074	3.20335	5.48336	3.67878	4.51584	0.0335824	0.26985
ENSG00000127603	microtubule-actin crosslinking factor 1 [Source:HGNC Symbol;Acc:13664]	MACF1	protein_coding	-1.60539	8.60794	7.69923	8.79512	7.5382	9.97588	7.5482	9.49922	4.51386	0.0336212	0.26985
ENSG00000096696	desmoplakin [Source:HGNC Symbol;Acc:3052]	DSP	protein_coding	-1.59751	8.79599	8.25153	9.24525	7.66674	10.4794	7.71056	9.99057	4.5136	0.0336263	0.26985
ENSG00000129595	erythrocyte membrane protein band 4.1 like 4A [Source:HGNC Symbol;Acc:13278]	EPB41L4A	protein_coding	-1.9404	3.927	4.13124	6.08105	1.71618	4.17495	1.8899	5.44483	4.51211	0.0336558	0.26985
ENSG00000165704	hypoxanthine phosphoribosyltransferase 1 [Source:HGNC Symbol;Acc:5157]	HPRT1	protein_coding	7.13529	5.25795	1.41864	5.6431	5.33399	0.865351	5.26297	4.73825	4.50898	0.0337174	0.270021
ENSG00000132912	dynactin 4 (p62) [Source:HGNC Symbol;Acc:15518]	DCTN4	protein_coding	3.91421	6.38025	2.0036	3.80504	6.67058	3.71759	6.58783	3.75971	4.49524	0.0339893	0.271874
ENSG00000142676	ribosomal protein L11 [Source:HGNC Symbol;Acc:10301]	RPL11	protein_coding	1.62627	8.99191	8.4901	8.09354	9.1694	8.11311	9.13364	8.10326	4.49261	0.0340418	0.271969
ENSG00000121578	UDP-Gal:betaGlcNAc beta 1,4- galactosyltransferase, polypeptide 4 [Source:HGNC Symbol;Acc:927]	B4GALT4	protein_coding	-3.41815	6.31243	1.41864	6.66056	4.21459	8.26301	4.16017	7.66509	4.48341	0.0342253	0.272989
ENSG00000105202	fibrillarin [Source:HGNC Symbol;Acc:3599]	FBL	protein_coding	2.94636	4.64029	1.41864	4.93747	4.75302	2.65977	4.68999	4.27618	4.48146	0.0342644	0.272989
ENSG00000176473	WD repeat domain 25 [Source:HGNC Symbol;Acc:21064]	WDR25	protein_coding	6.08181	5.30635	1.41864	0.353986	5.7538	1.39822	5.67823	0.925068	4.48011	0.0342916	0.272989
ENSG00000135047	cathepsin L [Source:HGNC Symbol;Acc:2537]	CTSL	protein_coding	4.80749	5.12002	1.41864	0.353986	5.71822	1.99748	5.643	1.33619	4.47673	0.0343595	0.273104
ENSG00000089009	ribosomal protein L6 [Source:HGNC Symbol;Acc:10362]	RPL6	protein_coding	1.90871	8.46464	4.8576	7.36675	8.71011	7.41942	8.62109	7.39294	4.47533	0.0343875	0.273104
ENSG00000018280	solute carrier family 11 (proton-coupled divalent metal ion transporter), member 1 [Source:HGNC Symbol;Acc:10907]	SLC11A1	protein_coding	1.73452	3.44765	5.6238	4.53594	2.9907	2.1992	3.24506	3.77056	4.46745	0.0345465	0.273815
ENSG00000187997	chromosome 17 open reading frame 99 [Source:HGNC Symbol;Acc:34490]	C17orf99	protein_coding	-1.90404	3.15006	1.41864	3.6362	1.95999	4.24863	1.94099	3.9645	4.46684	0.0345588	0.273815
ENSG00000113569	nucleoporin 155kDa [Source:HGNC Symbol;Acc:8063]	NUP155	protein_coding	-2.09675	6.07735	5.24544	7.51183	4.2904	7.05921	4.3461	7.31008	4.46288	0.0346391	0.274128
ENSG00000104312	receptor-interacting serine-threonine kinase 2 [Source:HGNC Symbol;Acc:10020]	RIPK2	protein_coding	-4.01359	6.04935	1.41864	8.72758	2.07494	6.43832	2.05493	7.9918	4.45946	0.0347084	0.274352
ENSG00000142541	ribosomal protein L13a [Source:HGNC Symbol;Acc:10304]	RPL13A	protein_coding	1.8106	10.5698	6.48473	9.3471	10.7712	9.48106	10.6778	9.41536	4.45005	0.0349002	0.275543
ENSG00000110048	oxysterol binding protein [Source:HGNC Symbol;Acc:8503]	OSBP	protein_coding	5.28878	5.62472	1.41864	6.62117	5.78348	1.65742	5.69918	5.73267	4.44045	0.035097	0.276545
ENSG00000099139	proprotein convertase subtilisin/kexin type 5 [Source:HGNC Symbol;Acc:8747]	PCSK5	protein_coding	-2.7599	4.74417	2.41864	3.52336	3.12435	6.73232	3.1022	5.87604	4.43983	0.0351097	0.276545
ENSG00000143514	tumor protein p53 binding protein, 2 [Source:HGNC Symbol;Acc:12000]	TP53BP2	protein_coding	8.14174	6.22187	1.41864	6.62992	6.33883	0.869431	6.25648	5.61208	4.43565	0.0351958	0.276899
ENSG00000166716	zinc finger protein 592 [Source:HGNC Symbol;Acc:28986]	ZNF592	protein_coding	-3.51544	4.73131	4.5061	3.61744	1.65903	6.65164	1.89964	5.79975	4.42263	0.0354653	0.278472
ENSG00000088256	guanine nucleotide binding protein (G protein), alpha 11 (Gq class) [Source:HGNC Symbol;Acc:4379]	GNA11	protein_coding	3.49344	4.41753	2.05091	2.67369	4.83981	2.10244	4.77856	2.44083	4.42194	0.0354797	0.278472
ENSG00000139180	NADH dehydrogenase (ubiquinone) 1 alpha subcomplex, 9, 39kDa [Source:HGNC Symbol;Acc:7693]	NDUFA9	protein_coding	-2.22312	6.8218	3.22393	5.95113	5.80629	8.18066	5.73988	7.45388	4.41998	0.0355205	0.278472
ENSG00000159596	transmembrane protein 69 [Source:HGNC Symbol;Acc:28035]	TMEM69	protein_coding	6.79673	5.80176	1.41864	5.3889	6.34016	1.24235	6.25199	4.46703	4.41583	0.0356069	0.278824
ENSG00000112146	F-box protein 9 [Source:HGNC Symbol;Acc:13588]	FBXO9	protein_coding	2.30554	5.74156	6.60411	2.98831	6.0209	5.01953	6.05905	4.30867	4.41181	0.0356909	0.279156
ENSG00000130545	crumbs homolog 3 (Drosophila) [Source:HGNC Symbol;Acc:20237]	CRB3	protein_coding	5.26376	3.05618	1.41864	0.70129	3.38552	0.876998	3.3392	0.782918	4.40528	0.0358279	0.279901
ENSG00000092931	major facilitator superfamily domain containing 11 [Source:HGNC Symbol;Acc:25458]	MFSD11	protein_coding	-1.65488	3.74127	3.76772	4.01599	2.73006	5.27027	2.77779	4.80559	4.39882	0.0359638	0.280635
ENSG00000197102	dynein, cytoplasmic 1, heavy chain 1 [Source:HGNC Symbol;Acc:2961]	DYNC1H1	protein_coding	-2.08693	7.20535	1.41864	8.06296	6.1209	8.52902	6.03836	8.3113	4.39262	0.0360947	0.281061
ENSG00000067066	SP100 nuclear antigen [Source:HGNC Symbol;Acc:11206]	SP100	protein_coding	1.39532	7.49808	11.0807	7.43662	6.72437	6.69273	7.87479	7.10801	4.39227	0.0361023	0.281061
ENSG00000074416	monoglyceride lipase [Source:HGNC Symbol;Acc:17038]	MGLL	protein_coding	-1.70453	5.55435	3.69662	6.58282	4.65663	6.83609	4.62095	6.71472	4.38862	0.0361795	0.281335
ENSG00000108448	tripartite motif containing 16-like [Source:HGNC Symbol;Acc:32670]	TRIM16L	protein_coding	-1.40344	5.44522	5.35363	6.03733	4.3276	6.62944	4.3942	6.36235	4.37649	0.036438	0.282057
ENSG00000134697	guanine nucleotide binding protein-like 2 (nucleolar) [Source:HGNC Symbol;Acc:29925]	GNL2	protein_coding	2.82992	6.65218	3.45602	6.21231	7.08739	4.75455	7.00522	5.67081	4.37506	0.0364686	0.282057
ENSG00000134285	FK506 binding protein 11, 19 kDa [Source:HGNC Symbol;Acc:18624]	FKBP11	protein_coding	3.13471	5.99335	3.0036	5.37386	6.24439	3.84185	6.16956	4.77717	4.37373	0.036497	0.282057
ENSG00000136448	N-myristoyltransferase 1 [Source:HGNC Symbol;Acc:7857]	NMT1	protein_coding	2.99877	5.63969	2.0036	3.20867	6.08234	3.6402	6.00292	3.42752	4.37218	0.0365302	0.282057
ENSG00000165805	chromosome 12 open reading frame 50 [Source:HGNC Symbol;Acc:26665]	C12orf50	protein_coding	-1.73771	5.77052	6.40959	7.18937	4.29189	7.28879	4.49628	7.23928	4.37159	0.0365428	0.282057
ENSG00000165156	zinc fingers and homeoboxes 1 [Source:HGNC Symbol;Acc:12871]	ZHX1	protein_coding	5.88939	4.89174	1.41864	6.08171	4.74297	1.05267	4.67954	5.23764	4.3707	0.036562	0.282057
ENSG00000122786	caldesmon 1 [Source:HGNC Symbol;Acc:1441]	CALD1	protein_coding	-3.33733	5.55091	2.0036	7.86945	1.5859	5.12671	1.5961	7.08167	4.37048	0.0365668	0.282057
ENSG00000150054	membrane protein, palmitoylated 7 (MAGUK p55 subfamily member 7) [Source:HGNC Symbol;Acc:26542]	MPP7	protein_coding	2.1134	5.44141	5.85093	4.73023	5.62964	4.08855	5.64099	4.44591	4.36824	0.0366147	0.282102
ENSG00000135373	ets homologous factor [Source:HGNC Symbol;Acc:3246]	EHF	protein_coding	-3.27149	5.66268	1.41864	6.10263	3.96256	7.25225	3.90899	6.77718	4.36532	0.0366777	0.282162
ENSG00000144369	family with sequence similarity 171, member B [Source:HGNC Symbol;Acc:29412]	FAM171B	protein_coding	-6.04173	5.70501	1.41864	6.52582	1.38094	7.44694	1.37798	7.0318	4.36396	0.0367068	0.282162
ENSG00000138297	translocase of inner mitochondrial membrane 23 homolog (yeast) [Source:HGNC Symbol;Acc:17312]	TIMM23	protein_coding	-2.16654	6.5823	3.67263	6.30436	5.50647	8.23607	5.44976	7.56184	4.36083	0.0367744	0.282358
ENSG00000180263	FYVE, RhoGEF and PH domain containing 6 [Source:HGNC Symbol;Acc:21740]	FGD6	protein_coding	-3.43739	5.63273	1.41864	6.99231	3.53429	7.05477	3.48666	7.02369	4.35776	0.0368407	0.282544
ENSG00000070081	nucleobindin 2 [Source:HGNC Symbol;Acc:8044]	NUCB2	protein_coding	2.11082	6.61531	5.41412	5.17732	6.86138	5.62194	6.80586	5.40721	4.35298	0.0369442	0.283013
ENSG00000143815	lamin B receptor [Source:HGNC Symbol;Acc:6518]	LBR	protein_coding	-3.29496	4.9182	2.74057	5.57058	2.88177	6.83664	2.87361	6.3355	4.34592	0.0370976	0.283082
ENSG00000253710	ALG11, alpha-1,2-mannosyltransferase [Source:HGNC Symbol;Acc:32456]	ALG11	protein_coding	2.8371	5.63612	4.12241	6.20297	5.74625	3.23573	5.69271	5.44798	4.34579	0.0371006	0.283082
ENSG00000064933	PMS1 postmeiotic segregation increased 1 (S. cerevisiae) [Source:HGNC Symbol;Acc:9121]	PMS1	protein_coding	2.34308	3.84009	4.78811	3.39456	3.99888	2.52356	4.03895	3.025	4.3457	0.0371026	0.283082
ENSG00000152904	geranylgeranyl diphosphate synthase 1 [Source:HGNC Symbol;Acc:4249]	GGPS1	protein_coding	-1.39757	5.94351	6.02449	5.22497	4.8007	7.73116	4.88899	6.96773	4.34452	0.0371282	0.283082
ENSG00000167778	SPRY domain containing 3 [Source:HGNC Symbol;Acc:25920]	SPRYD3	protein_coding	-4.74999	5.02153	1.41864	6.51911	1.00448	5.3487	1.01352	6.05905	4.34287	0.0371643	0.283082
ENSG00000088930	5'-3' exoribonuclease 2 [Source:HGNC Symbol;Acc:12836]	XRN2	protein_coding	3.10353	6.98764	7.66657	6.44473	7.2375	4.59779	7.2677	5.84115	4.33359	0.0373674	0.284306
ENSG00000163961	ring finger protein 168, E3 ubiquitin protein ligase [Source:HGNC Symbol;Acc:26661]	RNF168	protein_coding	4.19458	5.57316	3.08312	5.88309	5.6007	2.305	5.53566	5.09245	4.32145	0.0376348	0.286016
ENSG00000189164	zinc finger protein 527 [Source:HGNC Symbol;Acc:29385]	ZNF527	protein_coding	-1.2163	4.12813	5.39729	5.23481	2.89976	5.20222	3.12122	5.21835	4.31527	0.0377717	0.286434
ENSG00000166200	COP9 signalosome subunit 2 [Source:HGNC Symbol;Acc:30747]	COPS2	protein_coding	3.31377	6.33794	1.41864	6.47122	6.52493	3.96568	6.44197	5.75109	4.31511	0.0377753	0.286434
ENSG00000087494	parathyroid hormone-like hormone [Source:HGNC Symbol;Acc:9607]	PTHLH	protein_coding	8.24545	4.35962	1.41864	4.25872	4.56395	0.64477	4.50053	3.53662	4.30768	0.0379407	0.286782
ENSG00000152102	family with sequence similarity 168, member B [Source:HGNC Symbol;Acc:27016]	FAM168B	protein_coding	3.22952	6.43939	11.342	5.76765	3.15698	2.076	7.3874	4.89682	4.30662	0.0379643	0.286782
ENSG00000197147	leucine rich repeat containing 8 family, member B [Source:HGNC Symbol;Acc:30692]	LRRC8B	protein_coding	3.75293	5.76042	1.41864	2.55561	6.46173	3.32057	6.37746	2.94269	4.30654	0.0379661	0.286782
ENSG00000118007	stromal antigen 1 [Source:HGNC Symbol;Acc:11354]	STAG1	protein_coding	4.71584	4.25444	1.41864	1.16536	4.86944	1.52643	4.80452	1.34357	4.30537	0.0379923	0.286782
ENSG00000165699	tuberous sclerosis 1 [Source:HGNC Symbol;Acc:12362]	TSC1	protein_coding	-3.12197	4.58117	1.41864	5.5116	2.77566	6.65694	2.74174	6.19157	4.29818	0.0381533	0.287673
ENSG00000135069	phosphoserine aminotransferase 1 [Source:HGNC Symbol;Acc:19129]	PSAT1	protein_coding	10.0919	6.19519	1.41864	6.15457	6.41008	0.64477	6.32857	5.31199	4.25896	0.0390439	0.293816
ENSG00000013563	deoxyribonuclease I-like 1 [Source:HGNC Symbol;Acc:2957]	DNASE1L1	protein_coding	1.88859	3.86603	5.99214	3.54713	3.75369	2.75142	3.95578	3.21191	4.25845	0.0390556	0.293816
ENSG00000133195	solute carrier family 39, member 11 [Source:HGNC Symbol;Acc:14463]	SLC39A11	protein_coding	-3.34815	6.84907	1.41864	6.04919	5.41392	9.01229	5.3431	8.18924	4.24587	0.0393459	0.295358
ENSG00000186577	chromosome 6 open reading frame 1 [Source:HGNC Symbol;Acc:1340]	C6orf1	protein_coding	5.16897	4.70179	1.41864	5.88314	4.62046	1.25716	4.55902	5.02638	4.24501	0.0393659	0.295358
ENSG00000060138	Y box binding protein 3 [Source:HGNC Symbol;Acc:2428]	YBX3	protein_coding	1.69813	6.87528	6.58274	6.8997	7.22136	5.89994	7.18878	6.48712	4.24385	0.0393928	0.295358
ENSG00000187193	metallothionein 1X [Source:HGNC Symbol;Acc:7405]	MT1X	protein_coding	5.04637	5.70828	1.41864	5.46948	5.94988	2.07681	5.86991	4.68712	4.24013	0.0394792	0.295675
ENSG00000164941	integrator complex subunit 8 [Source:HGNC Symbol;Acc:26048]	INTS8	protein_coding	2.13181	4.74168	4.99456	4.36289	5.05503	3.22021	5.05018	3.91949	4.23666	0.0395598	0.295948
ENSG00000135387	cell cycle associated protein 1 [Source:HGNC Symbol;Acc:6743]	CAPRIN1	protein_coding	4.32152	5.80548	1.41864	3.19486	6.4949	2.89938	6.4115	3.05699	4.22798	0.0397627	0.297134
ENSG00000235109	zinc finger and SCAN domain containing 31 [Source:HGNC Symbol;Acc:14097]	ZSCAN31	protein_coding	8.51536	4.41164	1.41864	1.32628	4.74482	0.64477	4.68242	1.04474	4.22238	0.0398941	0.297357
ENSG00000160305	DIP2 disco-interacting protein 2 homolog A (Drosophila) [Source:HGNC Symbol;Acc:17217]	DIP2A	protein_coding	2.48556	7.23027	6.06509	5.35366	8.00093	5.8321	7.92827	5.61064	4.21882	0.0399779	0.297357
ENSG00000127125	phosphopantothenoylcysteine synthetase [Source:HGNC Symbol;Acc:25686]	PPCS	protein_coding	2.57643	5.71875	9.98279	5.73772	4.22418	3.14453	6.21455	5.00459	4.21787	0.0400003	0.297357
ENSG00000150760	dedicator of cytokinesis 1 [Source:HGNC Symbol;Acc:2987]	DOCK1	protein_coding	-3.01219	4.79938	1.41864	6.92358	2.25407	5.42609	2.23009	6.36533	4.21752	0.0400085	0.297357
ENSG00000136169	SET domain, bifurcated 2 [Source:HGNC Symbol;Acc:20263]	SETDB2	protein_coding	3.01042	4.727	5.43879	4.98915	5.17737	2.40074	5.18987	4.21648	4.21728	0.0400143	0.297357
ENSG00000173545	zinc finger protein 622 [Source:HGNC Symbol;Acc:30958]	ZNF622	protein_coding	7.80537	4.96371	1.41864	5.27063	5.08002	0.755588	5.01465	4.44814	4.21527	0.0400617	0.29738
ENSG00000178988	Morf4 family associated protein 1-like 1 [Source:HGNC Symbol;Acc:28796]	MRFAP1L1	protein_coding	4.21038	6.54382	10.3479	4.75821	6.19469	3.46475	7.21572	4.30079	4.20576	0.040287	0.29865
ENSG00000143368	splicing factor 3b, subunit 4, 49kDa [Source:HGNC Symbol;Acc:10771]	SF3B4	protein_coding	-2.11453	3.20702	1.41864	1.93374	2.40373	5.00352	2.3764	4.14654	4.1996	0.0404336	0.29865
ENSG00000245532	nuclear paraspeckle assembly transcript 1 (non-protein coding) [Source:HGNC Symbol;Acc:30815]	NEAT1	lincRNA	1.54268	12.295	11.4967	10.5274	12.7305	11.4901	12.6742	11.0884	4.19798	0.0404723	0.29865
ENSG00000169504	chloride intracellular channel 4 [Source:HGNC Symbol;Acc:13518]	CLIC4	protein_coding	3.12345	7.00952	1.41864	5.48441	7.44151	4.84452	7.35132	5.19951	4.19749	0.0404838	0.29865
ENSG00000188976	nucleolar complex associated 2 homolog (S. cerevisiae) [Source:HGNC Symbol;Acc:24517]	NOC2L	protein_coding	2.2613	4.73046	4.0084	3.04246	4.91209	3.49059	4.87773	3.28103	4.19731	0.0404882	0.29865
ENSG00000164506	syntaxin binding protein 5 (tomosyn) [Source:HGNC Symbol;Acc:19665]	STXBP5	protein_coding	5.87229	5.80732	1.41864	3.07398	6.18087	1.86592	6.09994	2.57741	4.19681	0.0405002	0.29865
ENSG00000123106	coiled-coil domain containing 91 [Source:HGNC Symbol;Acc:24855]	CCDC91	protein_coding	6.29477	5.37518	1.41864	6.03648	5.43575	1.15789	5.35633	5.04499	4.19319	0.0405867	0.298738
ENSG00000186566	G patch domain containing 8 [Source:HGNC Symbol;Acc:29066]	GPATCH8	protein_coding	-2.12279	6.73477	1.41864	4.49357	5.85656	8.63823	5.7794	7.66056	4.19258	0.0406013	0.298738
ENSG00000156587	ubiquitin-conjugating enzyme E2L 6 [Source:HGNC Symbol;Acc:12490]	UBE2L6	protein_coding	7.40934	5.22307	1.41864	4.7821	5.41676	0.871547	5.34579	3.91913	4.19052	0.0406505	0.298773
ENSG00000175581	mitochondrial ribosomal protein L48 [Source:HGNC Symbol;Acc:16653]	MRPL48	protein_coding	3.20164	5.47847	2.05091	5.11082	5.76073	3.2323	5.68667	4.47533	4.18818	0.0407067	0.298857
ENSG00000137168	peptidylprolyl isomerase (cyclophilin)-like 1 [Source:HGNC Symbol;Acc:9260]	PPIL1	protein_coding	9.18836	5.11142	1.41864	3.80595	5.53285	0.64477	5.46055	3.11678	4.18243	0.0408451	0.299546
ENSG00000165240	ATPase, Cu++ transporting, alpha polypeptide [Source:HGNC Symbol;Acc:869]	ATP7A	protein_coding	-3.69361	5.97068	1.41864	4.34268	3.84823	7.63797	3.79905	6.80031	4.16691	0.0412208	0.30197
ENSG00000119969	helicase, lymphoid-specific [Source:HGNC Symbol;Acc:4861]	HELLS	protein_coding	-1.84991	3.48674	1.5027	5.68285	1.53664	3.47458	1.53142	4.94834	4.16141	0.0413551	0.302072
ENSG00000133704	importin 8 [Source:HGNC Symbol;Acc:9853]	IPO8	protein_coding	2.60843	5.32811	3.25254	5.56655	5.45951	3.34688	5.39934	4.87435	4.1586	0.0414236	0.302072
ENSG00000181350	family with sequence similarity 211, member A [Source:HGNC Symbol;Acc:32403]	FAM211A	protein_coding	1.90076	2.89499	1.41864	1.73568	3.18905	2.19208	3.1483	1.96643	4.15851	0.0414258	0.302072
ENSG00000018699	tetratricopeptide repeat domain 27 [Source:HGNC Symbol;Acc:25986]	TTC27	protein_coding	5.33953	4.06561	1.41864	0.685967	4.63229	1.21573	4.5702	0.954493	4.15756	0.0414491	0.302072
ENSG00000117395	EBNA1 binding protein 2 [Source:HGNC Symbol;Acc:15531]	EBNA1BP2	protein_coding	-2.56892	5.63399	1.41864	5.199	4.61979	7.45917	4.5576	6.72069	4.15712	0.0414599	0.302072
ENSG00000120137	pantothenate kinase 3 [Source:HGNC Symbol;Acc:19365]	PANK3	protein_coding	-2.1041	6.29847	4.05903	4.84995	5.12216	8.30929	5.08283	7.38299	4.1543	0.0415289	0.302205
ENSG00000071073	mannosyl (alpha-1,3-)-glycoprotein beta-1,4-N-acetylglucosaminyltransferase, isozyme A [Source:HGNC Symbol;Acc:7047]	MGAT4A	protein_coding	1.72137	5.99932	10.6457	4.44814	4.13286	4.69116	6.79614	4.57334	4.15269	0.0415685	0.302205
ENSG00000135245	hypoxia inducible lipid droplet-associated [Source:HGNC Symbol;Acc:28859]	HILPDA	protein_coding	3.52379	4.56898	2.49588	4.30152	4.73282	2.04432	4.67799	3.61451	4.14431	0.0417748	0.303161
ENSG00000123066	mediator complex subunit 13-like [Source:HGNC Symbol;Acc:22962]	MED13L	protein_coding	4.81395	6.04186	1.41864	6.83936	6.09264	2.25331	6.01442	5.90076	4.1388	0.041911	0.303161
ENSG00000115355	coiled-coil domain containing 88A [Source:HGNC Symbol;Acc:25523]	CCDC88A	protein_coding	2.58951	4.63304	3.63587	1.83765	5.03113	3.43491	4.98446	2.79425	4.13811	0.0419281	0.303161
ENSG00000112294	aldehyde dehydrogenase 5 family, member A1 [Source:HGNC Symbol;Acc:408]	ALDH5A1	protein_coding	-2.09891	3.78916	5.73043	6.10606	1.15962	3.93051	1.91681	5.4114	4.13755	0.0419419	0.303161
ENSG00000117450	peroxiredoxin 1 [Source:HGNC Symbol;Acc:9352]	PRDX1	protein_coding	-2.1447	8.41329	1.41864	8.75845	7.38042	9.86901	7.29091	9.41747	4.13715	0.0419519	0.303161
ENSG00000170142	ubiquitin-conjugating enzyme E2E 1 [Source:HGNC Symbol;Acc:12477]	UBE2E1	protein_coding	6.5179	3.8588	1.41864	6.02838	3.17425	0.64477	3.13317	5.01553	4.13636	0.0419713	0.303161
ENSG00000103197	tuberous sclerosis 2 [Source:HGNC Symbol;Acc:12363]	TSC2	protein_coding	-1.37874	6.10457	6.79715	5.95004	4.92875	8.10704	5.10914	7.39687	4.1343	0.0420225	0.303204
ENSG00000088826	spermine oxidase [Source:HGNC Symbol;Acc:15862]	SMOX	protein_coding	8.68242	4.96599	1.41864	6.16389	4.96545	0.64477	4.89773	5.10894	4.13203	0.0420788	0.303284
ENSG00000120889	tumor necrosis factor receptor superfamily, member 10b [Source:HGNC Symbol;Acc:11905]	TNFRSF10B	protein_coding	-1.91076	5.5631	4.43834	6.29773	4.36932	7.15764	4.37002	6.80204	4.12345	0.0422928	0.304499
ENSG00000044574	heat shock 70kDa protein 5 (glucose-regulated protein, 78kDa) [Source:HGNC Symbol;Acc:5238]	HSPA5	protein_coding	3.51169	8.66751	5.0694	8.19716	8.75903	5.99088	8.67109	7.509	4.11637	0.0424702	0.305062
ENSG00000100473	cochlin [Source:HGNC Symbol;Acc:2180]	COCH	protein_coding	9.10742	5.01281	1.41864	3.43118	5.27069	0.64477	5.20074	2.77334	4.11501	0.0425043	0.305062
ENSG00000138617	poly (ADP-ribose) polymerase family, member 16 [Source:HGNC Symbol;Acc:26040]	PARP16	protein_coding	-4.72339	4.55714	1.41864	3.57692	2.22727	6.93105	2.20359	6.10199	4.11429	0.0425224	0.305062
ENSG00000151116	UEV and lactate/malate dehyrogenase domains [Source:HGNC Symbol;Acc:30866]	UEVLD	protein_coding	3.51828	5.05257	2.68767	4.94884	5.49745	2.51403	5.43208	4.23188	4.11129	0.0425978	0.305062
ENSG00000163513	transforming growth factor, beta receptor II (70/80kDa) [Source:HGNC Symbol;Acc:11773]	TGFBR2	protein_coding	5.00466	4.73437	1.41864	3.97115	5.44239	1.39942	5.36769	3.31653	4.11098	0.0426057	0.305062
ENSG00000070061	inhibitor of kappa light polypeptide gene enhancer in B-cells, kinase complex-associated protein [Source:HGNC Symbol;Acc:5959]	IKBKAP	protein_coding	-2.62452	5.07942	7.18391	4.93291	2.52342	6.79628	3.47278	6.12607	4.10946	0.0426441	0.305062
ENSG00000184903	IMP2 inner mitochondrial membrane peptidase-like (S. cerevisiae) [Source:HGNC Symbol;Acc:14598]	IMMP2L	protein_coding	7.49152	4.12843	1.41864	5.58597	3.93523	0.64477	3.88099	4.66984	4.10556	0.0427425	0.30544
ENSG00000186448	zinc finger protein 197 [Source:HGNC Symbol;Acc:12988]	ZNF197	protein_coding	7.13605	4.77218	1.41864	0.75826	5.2322	0.768999	5.16216	0.760418	4.09552	0.0429969	0.306931
ENSG00000073008	poliovirus receptor [Source:HGNC Symbol;Acc:9705]	PVR	protein_coding	4.17059	4.11899	1.41864	4.70475	4.13836	1.47168	4.08492	3.99119	4.08935	0.0431544	0.307727
ENSG00000135596	microtubule associated monooxygenase, calponin and LIM domain containing 1 [Source:HGNC Symbol;Acc:20619]	MICAL1	protein_coding	7.57155	3.96451	2.41864	3.7842	4.00676	0.64477	3.96388	2.95646	4.0849	0.043268	0.307854
ENSG00000163636	proteasome (prosome, macropain) 26S subunit, non-ATPase, 6 [Source:HGNC Symbol;Acc:9564]	PSMD6	protein_coding	3.0469	6.75525	1.41864	6.14172	7.10506	4.70174	7.01705	5.60946	4.08356	0.0433024	0.307854
ENSG00000143753	delta(4)-desaturase, sphingolipid 1 [Source:HGNC Symbol;Acc:13709]	DEGS1	protein_coding	1.96817	4.5079	6.74776	4.39487	4.30637	3.64934	4.56841	4.07404	4.08327	0.0433099	0.307854
ENSG00000065135	guanine nucleotide binding protein (G protein), alpha inhibiting activity polypeptide 3 [Source:HGNC Symbol;Acc:4387]	GNAI3	protein_coding	4.23635	7.25932	1.41864	6.60507	7.56586	3.98761	7.47555	5.82908	4.0796	0.0434041	0.307892
ENSG00000105402	N-ethylmaleimide-sensitive factor attachment protein, alpha [Source:HGNC Symbol;Acc:7641]	NAPA	protein_coding	-2.71662	5.51524	4.22599	4.82673	3.72619	7.03657	3.74705	6.32283	4.07948	0.0434071	0.307892
ENSG00000073803	mitogen-activated protein kinase kinase kinase 13 [Source:HGNC Symbol;Acc:6852]	MAP3K13	protein_coding	-1.42467	7.57229	6.25608	8.50887	6.62962	8.56636	6.6095	8.53814	4.07761	0.0434552	0.307907
ENSG00000151835	spastic ataxia of Charlevoix-Saguenay (sacsin) [Source:HGNC Symbol;Acc:10519]	SACS	protein_coding	3.78082	5.02376	1.41864	0.460333	5.44315	2.68504	5.37057	1.8927	4.07288	0.043577	0.308444
ENSG00000165140	fructose-1,6-bisphosphatase 1 [Source:HGNC Symbol;Acc:3606]	FBP1	protein_coding	8.47794	4.41456	1.41864	2.76239	4.90783	0.64477	4.84361	2.06761	4.07027	0.0436444	0.308595
ENSG00000144401	methyltransferase like 21A [Source:HGNC Symbol;Acc:30476]	METTL21A	protein_coding	-1.14503	5.8309	6.30714	6.77915	4.87781	6.88917	4.99319	6.83507	4.06302	0.043832	0.309596
ENSG00000121481	ring finger protein 2 [Source:HGNC Symbol;Acc:10061]	RNF2	protein_coding	3.10771	4.82648	2.0694	2.45543	5.14361	2.9637	5.07966	2.7076	4.05964	0.0439199	0.309889
ENSG00000144063	mal, T-cell differentiation protein-like [Source:HGNC Symbol;Acc:6818]	MALL	protein_coding	-2.12426	7.30889	4.3003	7.37731	6.23054	8.81438	6.16936	8.26928	4.05183	0.0441236	0.310729
ENSG00000108883	elongation factor Tu GTP binding domain containing 2 [Source:HGNC Symbol;Acc:30858]	EFTUD2	protein_coding	3.63185	5.75346	2.0084	6.27997	5.46353	2.36817	5.3918	5.38004	4.0502	0.044166	0.310729
ENSG00000135046	annexin A1 [Source:HGNC Symbol;Acc:533]	ANXA1	protein_coding	-4.11532	8.17834	6.72242	10.5127	3.28295	8.31716	3.7396	9.8009	4.04975	0.0441779	0.310729
ENSG00000118523	connective tissue growth factor [Source:HGNC Symbol;Acc:2500]	CTGF	protein_coding	-5.25876	5.36446	1.41864	5.90803	2.13112	7.52691	2.11057	6.93764	4.04012	0.0444307	0.31218
ENSG00000163626	COX18 cytochrome C oxidase assembly factor [Source:HGNC Symbol;Acc:26801]	COX18	protein_coding	-1.64336	5.31783	4.40414	5.69931	4.46857	7.13048	4.4634	6.57298	4.03712	0.0445096	0.312406
ENSG00000125656	caseinolytic mitochondrial matrix peptidase proteolytic subunit [Source:HGNC Symbol;Acc:2084]	CLPP	protein_coding	3.67038	4.48548	1.41864	2.80975	4.84547	2.03533	4.78145	2.47447	4.03471	0.0445734	0.312527
ENSG00000141140	myosin XIX [Source:HGNC Symbol;Acc:26234]	MYO19	protein_coding	-2.12121	6.10947	4.86225	6.74259	4.68663	7.6866	4.69288	7.30066	4.02649	0.0447911	0.313537
ENSG00000133056	phosphatidylinositol-4-phosphate 3-kinase, catalytic subunit type 2 beta [Source:HGNC Symbol;Acc:8972]	PIK3C2B	protein_coding	2.82541	5.46038	5.26011	5.88001	5.52002	3.37185	5.50634	5.10955	4.02574	0.0448111	0.313537
ENSG00000169714	CCHC-type zinc finger, nucleic acid binding protein [Source:HGNC Symbol;Acc:13164]	CNBP	protein_coding	1.85947	8.69013	10.0462	5.97749	8.81449	8.474	8.93465	7.70043	4.02032	0.0449551	0.313815
ENSG00000116898	mitochondrial ribosomal protein S15 [Source:HGNC Symbol;Acc:14504]	MRPS15	protein_coding	2.40797	6.37628	5.20993	6.92895	6.29556	4.51654	6.25086	6.19763	4.02023	0.0449575	0.313815
ENSG00000102287	gamma-aminobutyric acid (GABA) A receptor, epsilon [Source:HGNC Symbol;Acc:4085]	GABRE	protein_coding	-4.24219	5.46005	1.41864	6.86796	2.96029	7.22728	2.92414	7.04756	4.01749	0.0450306	0.313815
ENSG00000139496	nucleoporin like 1 [Source:HGNC Symbol;Acc:20261]	NUPL1	protein_coding	3.02772	5.2435	3.3747	6.5747	5.06769	2.51457	5.01509	5.69909	4.01515	0.0450933	0.313815
ENSG00000139531	sulfite oxidase [Source:HGNC Symbol;Acc:11460]	SUOX	protein_coding	-1.60879	4.07952	5.27712	4.6419	2.45915	5.58664	2.7401	5.18575	4.01458	0.0451084	0.313815
ENSG00000244038	dolichyl-diphosphooligosaccharide--protein glycosyltransferase subunit (non-catalytic) [Source:HGNC Symbol;Acc:2728]	DDOST	protein_coding	3.13724	7.89985	1.41864	6.81316	8.135	5.75501	8.04197	6.40428	4.01222	0.0451716	0.313815
ENSG00000167528	zinc finger protein 641 [Source:HGNC Symbol;Acc:31834]	ZNF641	protein_coding	8.80881	4.7187	1.41864	1.70963	5.11422	0.64477	5.04237	1.28733	4.01196	0.0451785	0.313815
ENSG00000120875	dual specificity phosphatase 4 [Source:HGNC Symbol;Acc:3070]	DUSP4	protein_coding	7.14119	4.39657	1.41864	2.4525	4.81009	0.759341	4.74795	1.87706	4.00564	0.0453484	0.314669
ENSG00000258289	churchill domain containing 1 [Source:HGNC Symbol;Acc:20099]	CHURC1	protein_coding	-2.07372	6.30236	1.41864	6.26424	5.26202	7.75329	5.19257	7.19211	4.00368	0.0454009	0.314708
ENSG00000128908	INO80 complex subunit [Source:HGNC Symbol;Acc:26956]	INO80	protein_coding	4.11618	4.8218	6.8449	3.57297	5.33772	2.11679	5.46741	3.02878	3.99912	0.0455241	0.315236
ENSG00000130201	exocyst complex component 3-like 2 [Source:HGNC Symbol;Acc:30162]	EXOC3L2	protein_coding	-1.5743	2.7822	1.41864	3.7175	1.8576	3.68637	1.84191	3.70068	3.99363	0.0456726	0.315684
ENSG00000197217	ectonucleoside triphosphate diphosphohydrolase 4 [Source:HGNC Symbol;Acc:14573]	ENTPD4	protein_coding	-1.63295	5.82987	4.90921	8.26698	4.00037	5.85946	4.04947	7.5008	3.99325	0.045683	0.315684
ENSG00000167635	zinc finger protein 146 [Source:HGNC Symbol;Acc:12931]	ZNF146	protein_coding	5.16853	6.73585	1.41864	2.84902	7.04367	2.94411	6.95699	2.89256	3.9883	0.0458172	0.316285
ENSG00000172301	coordinator of PRMT5, differentiation stimulator [Source:HGNC Symbol;Acc:28848]	COPRS	protein_coding	7.7346	3.74201	1.41864	1.77466	4.11237	0.64477	4.0585	1.35285	3.97572	0.0461606	0.318328
ENSG00000128335	apolipoprotein L, 2 [Source:HGNC Symbol;Acc:619]	APOL2	protein_coding	-2.36995	7.84642	2.92707	8.55071	6.43667	8.88124	6.35911	8.72594	3.96886	0.0463492	0.3193
ENSG00000125848	fibronectin leucine rich transmembrane protein 3 [Source:HGNC Symbol;Acc:3762]	FLRT3	protein_coding	-4.10948	7.10846	1.41864	6.04847	4.98779	9.37448	4.91846	8.48844	3.96709	0.046398	0.319308
ENSG00000185658	bromodomain and WD repeat domain containing 1 [Source:HGNC Symbol;Acc:12760]	BRWD1	protein_coding	-1.77553	7.04715	4.86886	6.46174	6.24449	8.90108	6.19266	8.12449	3.96468	0.0464644	0.31934
ENSG00000113318	mutS homolog 3 [Source:HGNC Symbol;Acc:7326]	MSH3	protein_coding	4.52754	4.65839	1.41864	3.89829	4.8721	1.73443	4.80663	3.15304	3.96315	0.0465066	0.31934
ENSG00000147905	zinc finger, CCHC domain containing 7 [Source:HGNC Symbol;Acc:26209]	ZCCHC7	protein_coding	3.91012	5.18902	2.74057	3.70948	5.61194	2.7034	5.54493	3.28567	3.96174	0.0465456	0.31934
ENSG00000168291	pyruvate dehydrogenase (lipoamide) beta [Source:HGNC Symbol;Acc:8808]	PDHB	protein_coding	-1.78867	6.12891	4.37655	6.74504	5.00099	7.74826	4.97399	7.3241	3.95552	0.0467178	0.320193
ENSG00000186812	zinc finger protein 397 [Source:HGNC Symbol;Acc:18818]	ZNF397	protein_coding	-1.43102	5.77506	6.544	5.80927	4.40866	7.41668	4.61903	6.84463	3.95133	0.0468344	0.320665
ENSG00000197933	zinc finger protein 823 [Source:HGNC Symbol;Acc:30936]	ZNF823	protein_coding	9.09522	5.57619	1.41864	7.30677	5.69751	0.64477	5.62152	6.29559	3.94087	0.0471263	0.322334
ENSG00000127954	STEAP family member 4 [Source:HGNC Symbol;Acc:21923]	STEAP4	protein_coding	3.05456	8.85108	4.76914	6.87242	8.98358	6.7571	8.89301	6.81705	3.93189	0.0473788	0.323557
ENSG00000125457	MIF4G domain containing [Source:HGNC Symbol;Acc:24030]	MIF4GD	protein_coding	-3.78753	4.80428	1.41864	4.91207	3.0845	6.42839	3.04534	5.86247	3.92836	0.0474782	0.323557
ENSG00000140740	ubiquinol-cytochrome c reductase core protein II [Source:HGNC Symbol;Acc:12586]	UQCRC2	protein_coding	3.48934	5.99684	2.93466	6.22707	6.04606	3.40183	5.97206	5.49812	3.92652	0.0475303	0.323557
ENSG00000148154	UDP-glucose ceramide glucosyltransferase [Source:HGNC Symbol;Acc:12524]	UGCG	protein_coding	-2.39649	8.78933	1.41864	9.63006	7.46986	10.0084	7.37953	9.83146	3.92639	0.0475338	0.323557
ENSG00000104756	potassium channel tetramerization domain containing 9 [Source:HGNC Symbol;Acc:22401]	KCTD9	protein_coding	-4.35498	6.02802	1.41864	7.05572	3.23528	7.94702	3.19257	7.56715	3.92595	0.0475465	0.323557
ENSG00000172939	oxidative stress responsive 1 [Source:HGNC Symbol;Acc:8508]	OXSR1	protein_coding	-3.48594	5.5353	1.41864	6.64257	3.38685	6.96461	3.34224	6.81137	3.91823	0.0477653	0.324717
ENSG00000197497	zinc finger protein 665 [Source:HGNC Symbol;Acc:25885]	ZNF665	protein_coding	-1.21225	3.31902	2.72607	4.09768	2.42371	4.27728	2.43092	4.19018	3.91531	0.0478483	0.324951
ENSG00000153767	general transcription factor IIE, polypeptide 1, alpha 56kDa [Source:HGNC Symbol;Acc:4650]	GTF2E1	protein_coding	2.96556	7.12261	4.64746	7.78645	6.7646	4.37941	6.69693	6.94855	3.91223	0.047936	0.325035
ENSG00000147526	transforming, acidic coiled-coil containing protein 1 [Source:HGNC Symbol;Acc:11522]	TACC1	protein_coding	-2.18761	7.73478	6.32553	10.1555	5.36237	8.64975	5.42822	9.59021	3.91147	0.0479575	0.325035
ENSG00000163577	eukaryotic translation initiation factor 5A2 [Source:HGNC Symbol;Acc:3301]	EIF5A2	protein_coding	-2.06995	5.29358	1.72315	3.60801	4.3129	6.98992	4.2576	6.15588	3.90622	0.0481077	0.325327
ENSG00000099995	splicing factor 3a, subunit 1, 120kDa [Source:HGNC Symbol;Acc:10765]	SF3A1	protein_coding	5.05139	5.445	1.41864	2.83236	5.93673	2.04067	5.8577	2.49253	3.90593	0.048116	0.325327
ENSG00000124588	NAD(P)H dehydrogenase, quinone 2 [Source:HGNC Symbol;Acc:7856]	NQO2	protein_coding	4.36264	4.00824	7.34938	0.683009	4.30057	1.8528	4.71952	1.34512	3.90487	0.0481463	0.325327
ENSG00000178950	cyclin G associated kinase [Source:HGNC Symbol;Acc:4113]	GAK	protein_coding	-2.3428	4.60296	1.94971	4.1038	3.48192	6.14927	3.44302	5.35434	3.902	0.0482287	0.325556
ENSG00000111261	MANSC domain containing 1 [Source:HGNC Symbol;Acc:25505]	MANSC1	protein_coding	5.25849	6.17863	2.11017	7.52449	4.67744	1.25761	4.61488	6.57959	3.89791	0.0483462	0.326021
ENSG00000089157	ribosomal protein, large, P0 [Source:HGNC Symbol;Acc:10371]	RPLP0	protein_coding	1.80499	11.3572	3.22393	9.73498	11.6405	10.3135	11.5418	10.0523	3.89098	0.0485461	0.327039
ENSG00000143374	threonyl-tRNA synthetase 2, mitochondrial (putative) [Source:HGNC Symbol;Acc:30740]	TARS2	protein_coding	-1.50317	4.33774	5.18788	5.71842	2.7903	5.2745	2.99951	5.51203	3.88832	0.0486229	0.327228
ENSG00000152147	gem (nuclear organelle) associated protein 6 [Source:HGNC Symbol;Acc:20044]	GEMIN6	protein_coding	4.32703	4.94676	2.41864	2.81096	5.31445	2.28627	5.24866	2.57547	3.87298	0.0490694	0.329902
ENSG00000136754	abl-interactor 1 [Source:HGNC Symbol;Acc:11320]	ABI1	protein_coding	3.75998	6.34699	3.74057	6.51382	6.58414	3.40469	6.51044	5.66822	3.8692	0.0491799	0.330305
ENSG00000152939	MARVEL domain containing 2 [Source:HGNC Symbol;Acc:26401]	MARVELD2	protein_coding	-1.57175	7.87115	5.59217	7.74774	7.06287	9.27259	7.00577	8.70651	3.86756	0.0492279	0.330305
ENSG00000127993	RNA binding motif protein 48 [Source:HGNC Symbol;Acc:21785]	RBM48	protein_coding	2.68975	4.97909	3.66809	5.27216	5.16553	3.18107	5.11708	4.53177	3.86201	0.0493911	0.331068
ENSG00000089234	BRCA1 associated protein [Source:HGNC Symbol;Acc:1099]	BRAP	protein_coding	5.1517	4.69959	1.41864	0.353986	5.33112	1.3745	5.2608	0.913593	3.85694	0.0495406	0.331739
ENSG00000169213	RAB3B, member RAS oncogene family [Source:HGNC Symbol;Acc:9778]	RAB3B	protein_coding	2.76223	6.72834	3.87676	4.67688	7.20756	5.08839	7.12695	4.89526	3.85117	0.0497112	0.332549
ENSG00000179335	CDC-like kinase 3 [Source:HGNC Symbol;Acc:2071]	CLK3	protein_coding	2.50125	4.9091	3.64206	3.81794	5.23872	3.2976	5.18777	3.58362	3.84831	0.0497963	0.332751
ENSG00000163565	interferon, gamma-inducible protein 16 [Source:HGNC Symbol;Acc:5395]	IFI16	protein_coding	4.22288	7.2979	11.6029	1.96082	6.40144	4.89963	8.10067	4.08958	3.84681	0.0498407	0.332751
ENSG00000165626	BEN domain containing 7 [Source:HGNC Symbol;Acc:23514]	BEND7	protein_coding	-1.71996	4.66373	4.57245	6.07652	3.14243	5.31166	3.22769	5.78293	3.84499	0.0498948	0.332781
ENSG00000204387	chromosome 6 open reading frame 48 [Source:HGNC Symbol;Acc:19078]	C6orf48	protein_coding	4.87148	5.27817	1.41864	1.13943	5.97514	2.07981	5.89634	1.65008	3.84289	0.0499574	0.332867
ENSG00000198488	UDP-GlcNAc:betaGal beta-1,3-N-acetylglucosaminyltransferase 6 (core 3 synthase) [Source:HGNC Symbol;Acc:24141]	B3GNT6	protein_coding	-1.5765	3.4544	3.528	4.47197	2.11703	4.19849	2.18826	4.34207	3.83157	0.0502957	0.334145
ENSG00000184557	suppressor of cytokine signaling 3 [Source:HGNC Symbol;Acc:19391]	SOCS3	protein_coding	4.91937	5.10242	1.41864	2.67296	5.59082	1.63395	5.51757	2.26808	3.83104	0.0503117	0.334145
ENSG00000185404	SP140 nuclear body protein-like [Source:HGNC Symbol;Acc:25105]	SP140L	protein_coding	2.82741	5.24826	2.52633	5.55164	5.34301	3.13106	5.27706	4.77879	3.83044	0.0503297	0.334145
ENSG00000183426	nuclear pore complex interacting protein family, member A1 [Source:HGNC Symbol;Acc:7909]	NPIPA1	protein_coding	-2.15593	4.99711	3.32361	4.60156	3.62	7.04087	3.60419	6.28589	3.82932	0.0503635	0.334145
ENSG00000176209	small integral membrane protein 19 [Source:HGNC Symbol;Acc:25166]	SMIM19	protein_coding	3.24845	4.20878	7.21306	4.22993	3.8456	2.04633	4.34399	3.55978	3.82743	0.0504203	0.334145
ENSG00000069020	microtubule associated serine/threonine kinase family member 4 [Source:HGNC Symbol;Acc:19037]	MAST4	protein_coding	1.73296	7.58151	10.6913	7.12578	7.27653	6.76956	7.97356	6.961	3.8265	0.0504483	0.334145
ENSG00000138772	annexin A3 [Source:HGNC Symbol;Acc:541]	ANXA3	protein_coding	-3.10704	7.86668	1.41864	8.72804	6.30828	9.43666	6.22716	9.12592	3.81354	0.05084	0.336304
ENSG00000198373	WW domain containing E3 ubiquitin protein ligase 2 [Source:HGNC Symbol;Acc:16804]	WWP2	protein_coding	4.48543	3.62215	2.0036	4.94947	3.45323	0.897999	3.41664	3.9802	3.8124	0.0508746	0.336304
ENSG00000226907	cancer/testis antigen family 45, member A6 [Source:HGNC Symbol;Acc:33271]	CT45A6	protein_coding	-1.4766	3.84926	3.94471	4.56135	2.7726	5.23965	2.83163	4.94476	3.80761	0.0510203	0.336935
ENSG00000125445	mitochondrial ribosomal protein S7 [Source:HGNC Symbol;Acc:14499]	MRPS7	protein_coding	2.96379	6.42639	2.74057	6.84782	6.34038	3.88554	6.26275	6.07167	3.80345	0.0511472	0.336977
ENSG00000175215	CTD (carboxy-terminal domain, RNA polymerase II, polypeptide A) small phosphatase 2 [Source:HGNC Symbol;Acc:17077]	CTDSP2	protein_coding	2.66738	7.90141	11.2649	6.82194	7.53773	6.16897	8.36709	6.53841	3.80238	0.0511799	0.336977
ENSG00000138190	exocyst complex component 6 [Source:HGNC Symbol;Acc:23196]	EXOC6	protein_coding	4.76721	4.38079	1.41864	5.62024	4.56989	1.15596	4.51001	4.6474	3.80134	0.0512116	0.336977
ENSG00000154229	protein kinase C, alpha [Source:HGNC Symbol;Acc:9393]	PRKCA	protein_coding	2.95242	6.01405	4.53217	5.62754	6.20139	3.69929	6.14436	4.97824	3.7993	0.0512741	0.336977
ENSG00000248771		RP11-294O2.2	lincRNA	2.42796	5.14018	4.23114	2.42807	5.69569	3.86374	5.64421	3.31622	3.79917	0.051278	0.336977
ENSG00000185344	ATPase, H+ transporting, lysosomal V0 subunit a2 [Source:HGNC Symbol;Acc:18481]	ATP6V0A2	protein_coding	1.54784	6.0238	10.1647	5.5009	4.81233	5.19171	6.54448	5.35554	3.79173	0.0515064	0.337744
ENSG00000109475	ribosomal protein L34 [Source:HGNC Symbol;Acc:10340]	RPL34	protein_coding	1.43428	8.97022	8.93828	8.04291	9.10774	8.1668	9.09716	8.10588	3.79137	0.0515175	0.337744
ENSG00000140553	unc-45 homolog A (C. elegans) [Source:HGNC Symbol;Acc:30594]	UNC45A	protein_coding	-1.28753	5.39637	5.95811	5.49391	4.36445	7.10849	4.48868	6.51981	3.79045	0.0515459	0.337744
ENSG00000164169	protein arginine methyltransferase 10 (putative) [Source:HGNC Symbol;Acc:25099]	PRMT10	protein_coding	5.94475	4.34851	1.41864	0.353986	4.88532	1.06839	4.81749	0.723651	3.78225	0.0517991	0.339071
ENSG00000135678	carboxypeptidase M [Source:HGNC Symbol;Acc:2311]	CPM	protein_coding	2.74833	9.43788	6.26212	7.55354	9.66064	7.18545	9.57261	7.3831	3.77757	0.0519442	0.339181
ENSG00000133114	GPALPP motifs containing 1 [Source:HGNC Symbol;Acc:20298]	GPALPP1	protein_coding	2.11382	4.809	4.90857	3.94687	5.05067	3.60521	5.04239	3.78314	3.77707	0.0519595	0.339181
ENSG00000176731	chromosome 8 open reading frame 59 [Source:HGNC Symbol;Acc:32235]	C8orf59	protein_coding	3.19487	4.98771	1.41864	5.09423	5.2542	2.81744	5.18298	4.44407	3.77441	0.0520423	0.339181
ENSG00000160785	solute carrier family 25, member 44 [Source:HGNC Symbol;Acc:29036]	SLC25A44	protein_coding	4.18903	4.92816	2.433	2.44757	5.77238	1.87537	5.69964	2.21365	3.77354	0.0520693	0.339181
ENSG00000160062	zinc finger and BTB domain containing 8A [Source:HGNC Symbol;Acc:24172]	ZBTB8A	protein_coding	6.5053	3.50912	1.41864	1.10872	3.95924	0.755588	3.90603	0.952179	3.77248	0.0521022	0.339181
ENSG00000123684	lysophosphatidylglycerol acyltransferase 1 [Source:HGNC Symbol;Acc:28985]	LPGAT1	protein_coding	-2.0719	6.14336	3.95966	5.75188	5.07027	7.95112	5.02922	7.25499	3.77193	0.0521194	0.339181
ENSG00000182141	zinc finger protein 708 [Source:HGNC Symbol;Acc:12945]	ZNF708	protein_coding	2.85748	3.95851	2.0036	2.15636	4.16744	2.14081	4.11475	2.14702	3.76805	0.0522405	0.339639
ENSG00000175073	valosin containing protein (p97)/p47 complex interacting protein 1 [Source:HGNC Symbol;Acc:30897]	VCPIP1	protein_coding	2.24418	4.96939	3.91689	4.29625	5.35618	3.68785	5.30707	4.0288	3.75668	0.0525969	0.340821
ENSG00000163935	Scm-like with four mbt domains 1 [Source:HGNC Symbol;Acc:20255]	SFMBT1	protein_coding	5.35894	5.93063	2.41864	5.55054	6.06466	1.61678	5.9898	4.66912	3.75491	0.0526528	0.340821
ENSG00000254162		RP11-48B3.3	lincRNA	-1.46558	4.41208	3.7776	5.75946	3.23409	5.25615	3.25633	5.53098	3.75441	0.0526683	0.340821
ENSG00000134262	adaptor-related protein complex 4, beta 1 subunit [Source:HGNC Symbol;Acc:572]	AP4B1	protein_coding	3.84833	5.46953	1.41864	6.49909	5.37015	2.48493	5.29801	5.62164	3.75417	0.052676	0.340821
ENSG00000115365	LanC lantibiotic synthetase component C-like 1 (bacterial) [Source:HGNC Symbol;Acc:6508]	LANCL1	protein_coding	7.71228	6.25779	1.41864	7.10448	6.14807	1.0534	6.06717	6.15278	3.75415	0.0526766	0.340821
ENSG00000169255	beta-1,3-N-acetylgalactosaminyltransferase 1 (globoside blood group) [Source:HGNC Symbol;Acc:918]	B3GALNT1	protein_coding	-4.36558	4.96602	1.41864	4.087	2.37587	7.3443	2.34701	6.48804	3.74903	0.052838	0.340865
ENSG00000143319	interferon stimulated exonuclease gene 20kDa-like 2 [Source:HGNC Symbol;Acc:25745]	ISG20L2	protein_coding	-1.83082	5.66712	4.83278	6.05711	4.58926	6.96967	4.59942	6.58199	3.74874	0.0528473	0.340865
ENSG00000117597	digestive organ expansion factor homolog (zebrafish) [Source:HGNC Symbol;Acc:28440]	DIEXF	protein_coding	3.14425	3.64946	2.61713	1.55146	4.05511	2.16471	4.01531	1.87314	3.74833	0.0528603	0.340865
ENSG00000161217	phosphate cytidylyltransferase 1, choline, alpha [Source:HGNC Symbol;Acc:8754]	PCYT1A	protein_coding	2.5047	6.50332	3.41864	6.80833	6.62906	4.56395	6.55082	6.13892	3.74668	0.0529126	0.340865
ENSG00000135916	integral membrane protein 2C [Source:HGNC Symbol;Acc:6175]	ITM2C	protein_coding	-3.64866	3.70679	1.41864	4.74846	1.26926	4.83577	1.26956	4.78914	3.74491	0.0529687	0.340865
ENSG00000140365	COMM domain containing 4 [Source:HGNC Symbol;Acc:26027]	COMMD4	protein_coding	-2.22355	5.69202	3.3747	7.02335	3.6121	6.81922	3.60052	6.92817	3.73977	0.0531316	0.340865
ENSG00000178035	IMP (inosine 5'-monophosphate) dehydrogenase 2 [Source:HGNC Symbol;Acc:6053]	IMPDH2	protein_coding	2.55622	7.71061	6.03335	5.67356	8.12035	6.34449	8.04859	6.03942	3.7394	0.0531435	0.340865
ENSG00000116649	spermidine synthase [Source:HGNC Symbol;Acc:11296]	SRM	protein_coding	4.63589	3.72904	1.41864	0.353986	4.01832	1.41344	3.96441	0.943429	3.73557	0.0532654	0.340865
ENSG00000105856	HMG-box transcription factor 1 [Source:HGNC Symbol;Acc:23200]	HBP1	protein_coding	2.20374	8.26139	12.6506	6.42446	6.96469	7.10803	9.05701	6.80298	3.73516	0.0532785	0.340865
ENSG00000172175	mucosa associated lymphoid tissue lymphoma translocation gene 1 [Source:HGNC Symbol;Acc:6819]	MALT1	protein_coding	-3.97151	5.03207	1.41864	5.90498	2.1816	6.38913	2.15864	6.16278	3.73381	0.0533217	0.340865
ENSG00000140832	MARVEL domain containing 3 [Source:HGNC Symbol;Acc:30525]	MARVELD3	protein_coding	1.96612	4.56282	5.55983	4.04549	4.5604	3.45097	4.62205	3.79066	3.73239	0.0533668	0.340865
ENSG00000121749	TBC1 domain family, member 15 [Source:HGNC Symbol;Acc:25694]	TBC1D15	protein_coding	-1.97663	6.07461	3.46128	5.03537	5.16971	7.97486	5.11787	7.15931	3.73205	0.0533779	0.340865
ENSG00000132530	XIAP associated factor 1 [Source:HGNC Symbol;Acc:30932]	XAF1	protein_coding	-1.68494	4.48754	5.71289	4.39803	2.77936	5.88896	3.10909	5.33866	3.73176	0.0533872	0.340865
ENSG00000118260	cAMP responsive element binding protein 1 [Source:HGNC Symbol;Acc:2345]	CREB1	protein_coding	2.15701	6.23591	10.3992	5.61323	5.17222	4.94984	6.83509	5.32036	3.73151	0.0533952	0.340865
ENSG00000169057	methyl CpG binding protein 2 (Rett syndrome) [Source:HGNC Symbol;Acc:6990]	MECP2	protein_coding	-1.34672	4.81953	5.23626	5.68562	3.58705	5.76743	3.7038	5.72699	3.72862	0.0534876	0.34113
ENSG00000165813	chromosome 10 open reading frame 118 [Source:HGNC Symbol;Acc:24349]	C10orf118	protein_coding	-2.39753	6.00378	1.41864	5.96565	4.80509	7.57918	4.74069	6.98903	3.72173	0.0537086	0.342214
ENSG00000184007	protein tyrosine phosphatase type IVA, member 2 [Source:HGNC Symbol;Acc:9635]	PTP4A2	protein_coding	-1.76913	8.07518	1.41864	8.0085	7.19396	9.43363	7.10584	8.88741	3.71888	0.0538003	0.342348
ENSG00000171208	neuropilin (NRP) and tolloid (TLL)-like 2 [Source:HGNC Symbol;Acc:14644]	NETO2	protein_coding	1.96452	4.56059	7.01587	3.48296	4.4477	3.73406	4.73634	3.61559	3.71791	0.0538318	0.342348
ENSG00000184076	ubiquinol-cytochrome c reductase, complex III subunit X [Source:HGNC Symbol;Acc:30863]	UQCR10	protein_coding	-1.65795	6.47508	1.41864	6.72201	5.6798	7.73345	5.6049	7.31176	3.71406	0.0539559	0.34248
ENSG00000186409	coiled-coil domain containing 30 [Source:HGNC Symbol;Acc:26103]	CCDC30	protein_coding	2.96575	7.10283	4.56595	5.72036	7.96366	5.03386	7.8736	5.42333	3.71152	0.0540381	0.34248
ENSG00000100320	RNA binding protein, fox-1 homolog (C. elegans) 2 [Source:HGNC Symbol;Acc:9906]	RBFOX2	protein_coding	-2.02176	5.50752	6.92643	5.71762	3.56003	7.34514	4.0331	6.71111	3.7115	0.0540387	0.34248
ENSG00000123243	inter-alpha-trypsin inhibitor heavy chain family, member 5 [Source:HGNC Symbol;Acc:21449]	ITIH5	protein_coding	-1.27348	3.93454	3.88592	5.79316	2.58732	4.36954	2.65431	5.23326	3.71094	0.0540569	0.34248
ENSG00000198034	ribosomal protein S4, X-linked [Source:HGNC Symbol;Acc:10424]	RPS4X	protein_coding	1.67896	9.99056	9.92643	8.3395	10.1689	9.25444	10.1541	8.86831	3.70641	0.0542039	0.342819
ENSG00000164733	cathepsin B [Source:HGNC Symbol;Acc:2527]	CTSB	protein_coding	1.45531	9.13118	11.7489	9.04573	8.69722	8.35516	9.25635	8.74286	3.70613	0.0542128	0.342819
ENSG00000113391	family with sequence similarity 172, member A [Source:HGNC Symbol;Acc:25365]	FAM172A	protein_coding	3.37673	4.8087	6.75849	6.15048	4.41786	2.31058	4.66153	5.2051	3.70117	0.0543742	0.343516
ENSG00000129351	interleukin enhancer binding factor 3, 90kDa [Source:HGNC Symbol;Acc:6038]	ILF3	protein_coding	-2.16629	6.24783	1.41864	6.40701	5.31846	7.9207	5.24495	7.33125	3.69939	0.0544325	0.34356
ENSG00000173786	2',3'-cyclic nucleotide 3' phosphodiesterase [Source:HGNC Symbol;Acc:2158]	CNP	protein_coding	-2.06959	6.55787	5.39958	6.72941	5.4184	7.99908	5.41578	7.48759	3.69589	0.0545467	0.343957
ENSG00000166526	zinc finger protein 3 [Source:HGNC Symbol;Acc:13089]	ZNF3	protein_coding	-1.74327	4.60419	4.41322	7.16329	1.87462	3.94676	2.0714	6.32546	3.68552	0.0548867	0.345604
ENSG00000136875	pre-mRNA processing factor 4 [Source:HGNC Symbol;Acc:17349]	PRPF4	protein_coding	3.22179	5.39062	2.61083	1.90348	5.74524	3.34988	5.67504	2.78072	3.68479	0.0549109	0.345604
ENSG00000105875	WD repeat domain 91 [Source:HGNC Symbol;Acc:24997]	WDR91	protein_coding	-3.17394	5.37539	2.43656	6.59388	2.40259	6.10691	2.39994	6.37477	3.68188	0.0550066	0.345881
ENSG00000101901	ALG13, UDP-N-acetylglucosaminyltransferase subunit [Source:HGNC Symbol;Acc:30881]	ALG13	protein_coding	2.76008	5.07149	5.22599	4.32485	5.30564	3.29357	5.30012	3.94768	3.67759	0.0551484	0.346448
ENSG00000136305	cell death-inducing DFFA-like effector b [Source:HGNC Symbol;Acc:1977]	CIDEB	protein_coding	7.4495	4.17128	1.41864	2.50078	4.59455	0.726557	4.53159	1.96797	3.67379	0.0552744	0.346914
ENSG00000241878	phosphatidylserine decarboxylase [Source:HGNC Symbol;Acc:8999]	PISD	protein_coding	5.70374	5.31639	1.41864	6.58322	4.58949	0.865351	4.52779	5.59743	3.67081	0.0553731	0.34712
ENSG00000090686	ubiquitin specific peptidase 48 [Source:HGNC Symbol;Acc:18533]	USP48	protein_coding	-2.91344	6.13462	2.0036	5.95433	4.84659	8.17412	4.78132	7.47441	3.66815	0.0554618	0.34712
ENSG00000083807	solute carrier family 27 (fatty acid transporter), member 5 [Source:HGNC Symbol;Acc:10999]	SLC27A5	protein_coding	-1.2386	4.6528	4.92453	5.5575	3.59545	5.6515	3.67871	5.60312	3.66812	0.0554626	0.34712
ENSG00000176945	mucin 20, cell surface associated [Source:HGNC Symbol;Acc:23282]	MUC20	protein_coding	-2.90151	7.58011	1.41864	9.21355	4.52953	7.03607	4.46875	8.49748	3.66617	0.0555278	0.347204
ENSG00000141867	bromodomain containing 4 [Source:HGNC Symbol;Acc:13575]	BRD4	protein_coding	3.34511	4.6462	1.41864	5.47048	4.0579	1.87024	4.00435	4.55772	3.66136	0.0556881	0.34759
ENSG00000102317	RNA binding motif (RNP1, RRM) protein 3 [Source:HGNC Symbol;Acc:9900]	RBM3	protein_coding	1.52355	7.01381	9.84279	5.50645	6.79337	6.58951	7.3223	6.123	3.66121	0.0556932	0.34759
ENSG00000134250	notch 2 [Source:HGNC Symbol;Acc:7882]	NOTCH2	protein_coding	-3.62853	6.30484	1.41864	4.84168	4.34636	8.59368	4.2886	7.62974	3.6583	0.0557904	0.347619
ENSG00000143376	sorting nexin family member 27 [Source:HGNC Symbol;Acc:20073]	SNX27	protein_coding	2.85178	6.19977	3.59496	7.2191	6.10872	3.48848	6.0406	6.40044	3.65795	0.0558022	0.347619
ENSG00000114480	glucan (1,4-alpha-), branching enzyme 1 [Source:HGNC Symbol;Acc:4180]	GBE1	protein_coding	3.2338	5.5118	1.41864	0.353986	6.07759	3.77702	5.99647	2.78643	3.65642	0.0558534	0.347619
ENSG00000172922	ribonuclease H2, subunit C [Source:HGNC Symbol;Acc:24116]	RNASEH2C	protein_coding	3.83739	3.93767	1.41864	0.884383	4.49041	1.7874	4.43156	1.37213	3.65461	0.0559143	0.347675
ENSG00000102007	proteolipid protein 2 (colonic epithelium-enriched) [Source:HGNC Symbol;Acc:9087]	PLP2	protein_coding	2.62385	7.59212	1.41864	7.14011	7.96419	5.86572	7.87141	6.64733	3.65155	0.056017	0.34768
ENSG00000173230	golgin B1 [Source:HGNC Symbol;Acc:4429]	GOLGB1	protein_coding	-1.93492	8.2619	2.73768	7.77678	7.60213	9.67146	7.51058	9.01459	3.65134	0.0560242	0.34768
ENSG00000123144	chromosome 19 open reading frame 43 [Source:HGNC Symbol;Acc:28424]	C19orf43	protein_coding	3.31676	4.81443	6.17353	5.86038	3.90776	1.92667	4.12184	4.97716	3.64806	0.0561347	0.34768
ENSG00000093010	catechol-O-methyltransferase [Source:HGNC Symbol;Acc:2228]	COMT	protein_coding	3.70076	5.87152	1.41864	5.29399	6.16326	3.35014	6.08363	4.67074	3.64631	0.0561936	0.34768
ENSG00000103512	NODAL modulator 1 [Source:HGNC Symbol;Acc:30060]	NOMO1	protein_coding	4.21126	4.76461	1.41864	3.38673	5.24823	1.99786	5.17998	2.86719	3.64583	0.0562097	0.34768
ENSG00000096093	EF-hand domain (C-terminal) containing 1 [Source:HGNC Symbol;Acc:16406]	EFHC1	protein_coding	-2.42661	5.05048	3.22599	4.4653	3.80747	6.70487	3.78523	6.02355	3.64463	0.0562503	0.34768
ENSG00000145439	carbonyl reductase 4 [Source:HGNC Symbol;Acc:25891]	CBR4	protein_coding	-2.63036	6.79084	1.41864	7.5579	5.42198	8.29383	5.35172	7.97522	3.64381	0.0562782	0.34768
ENSG00000197548	autophagy related 7 [Source:HGNC Symbol;Acc:16935]	ATG7	protein_coding	2.59618	3.50996	4.96523	3.77856	3.51782	2.07434	3.60944	3.13411	3.64095	0.0563747	0.347955
ENSG00000215114	UBX domain protein 2B [Source:HGNC Symbol;Acc:27035]	UBXN2B	protein_coding	-2.07596	6.22275	3.37841	4.13084	5.319	8.29425	5.26148	7.365	3.63866	0.0564522	0.348113
ENSG00000249709	zinc finger protein 564 [Source:HGNC Symbol;Acc:31106]	ZNF564	protein_coding	4.57908	4.05611	2.78041	1.03496	4.38181	1.57929	4.33752	1.30737	3.63643	0.056528	0.34826
ENSG00000064726	BTB (POZ) domain containing 1 [Source:HGNC Symbol;Acc:1120]	BTBD1	protein_coding	-3.30639	4.83772	1.41864	6.29569	2.37569	6.11524	2.34664	6.21104	3.63057	0.0567275	0.348884
ENSG00000109846	crystallin, alpha B [Source:HGNC Symbol;Acc:2389]	CRYAB	protein_coding	4.44087	7.54801	1.41864	5.46231	8.12572	4.27372	8.03281	5.04223	3.62895	0.0567827	0.348884
ENSG00000065154	ornithine aminotransferase [Source:HGNC Symbol;Acc:8091]	OAT	protein_coding	-4.18468	4.80108	1.41864	5.0017	2.41894	6.86318	2.39121	6.15928	3.62758	0.0568294	0.348884
ENSG00000213079	SR-related CTD-associated factor 8 [Source:HGNC Symbol;Acc:20959]	SCAF8	protein_coding	5.90051	4.7949	1.41864	3.83356	5.46161	1.05618	5.38864	3.0843	3.62699	0.0568495	0.348884
ENSG00000163918	replication factor C (activator 1) 4, 37kDa [Source:HGNC Symbol;Acc:9972]	RFC4	protein_coding	-4.73186	5.24906	1.41864	5.38249	2.42213	7.09879	2.39387	6.48188	3.62529	0.0569077	0.348884
ENSG00000074964	Rho guanine nucleotide exchange factor (GEF) 10-like [Source:HGNC Symbol;Acc:25540]	ARHGEF10L	protein_coding	5.15436	3.53303	1.41864	2.61348	3.75216	0.968441	3.69927	2.00701	3.62348	0.0569696	0.348884
ENSG00000004142	polymerase (DNA-directed), delta interacting protein 2 [Source:HGNC Symbol;Acc:23781]	POLDIP2	protein_coding	5.00317	4.68686	1.41864	7.24937	4.02501	0.973206	3.97148	6.24483	3.62142	0.05704	0.348884
ENSG00000187147	ring finger protein 220 [Source:HGNC Symbol;Acc:25552]	RNF220	protein_coding	1.93226	4.101	4.05439	2.5439	4.31284	3.20575	4.30004	2.90368	3.62126	0.0570457	0.348884
ENSG00000164162	anaphase promoting complex subunit 10 [Source:HGNC Symbol;Acc:24077]	ANAPC10	protein_coding	-4.21493	4.118	1.41864	5.85942	1.16161	5.53324	1.16548	5.70921	3.61119	0.057392	0.350683
ENSG00000175106	trans-golgi network vesicle protein 23 homolog C (S. cerevisiae) [Source:HGNC Symbol;Acc:30453]	TVP23C	protein_coding	-1.65607	3.45611	1.41864	3.79192	2.60198	4.47612	2.57073	4.17747	3.60775	0.057511	0.35109
ENSG00000156162	dpy-19-like 4 (C. elegans) [Source:HGNC Symbol;Acc:27829]	DPY19L4	protein_coding	-2.27446	4.29598	2.433	4.82635	3.26882	6.17296	3.24223	5.64303	3.60517	0.0576003	0.351315
ENSG00000166233	ariadne RBR E3 ubiquitin protein ligase 1 [Source:HGNC Symbol;Acc:689]	ARIH1	protein_coding	-1.65887	5.20124	4.09558	5.50621	4.14749	6.85907	4.14278	6.33546	3.60098	0.0577456	0.351881
ENSG00000144655	cysteine-serine-rich nuclear protein 1 [Source:HGNC Symbol;Acc:14300]	CSRNP1	protein_coding	4.48948	4.17054	1.41864	2.84636	4.56571	1.53943	4.50595	2.38361	3.59737	0.0578709	0.35214
ENSG00000141644	methyl-CpG binding domain protein 1 [Source:HGNC Symbol;Acc:6916]	MBD1	protein_coding	5.09379	3.96067	1.41864	1.64076	4.34625	1.13985	4.2909	1.41791	3.59673	0.0578932	0.35214
ENSG00000174032	solute carrier family 25, member 30 [Source:HGNC Symbol;Acc:27371]	SLC25A30	protein_coding	-1.36618	4.5808	2.7776	5.34954	3.80318	5.63903	3.76863	5.50038	3.59338	0.0580101	0.35233
ENSG00000055917	pumilio RNA-binding family member 2 [Source:HGNC Symbol;Acc:14958]	PUM2	protein_coding	2.90142	6.48347	10.785	4.15499	5.59716	5.1763	7.25316	4.73063	3.59173	0.0580679	0.35233
ENSG00000116698	SMG7 nonsense mediated mRNA decay factor [Source:HGNC Symbol;Acc:16792]	SMG7	protein_coding	5.01198	5.35733	2.74057	4.27384	5.86532	1.99251	5.79305	3.53952	3.59132	0.0580822	0.35233
ENSG00000197892	kinesin family member 13B [Source:HGNC Symbol;Acc:14405]	KIF13B	protein_coding	-3.16553	6.48037	1.41864	8.2075	4.50369	7.6237	4.44337	7.94203	3.58809	0.0581952	0.352636
ENSG00000057935	metastasis associated 1 family, member 3 [Source:HGNC Symbol;Acc:23784]	MTA3	protein_coding	1.81315	3.8271	6.97261	3.10257	3.59669	3.15981	4.07339	3.12905	3.58363	0.0583514	0.352636
ENSG00000071537	sel-1 suppressor of lin-12-like (C. elegans) [Source:HGNC Symbol;Acc:10717]	SEL1L	protein_coding	2.78464	7.05959	2.0036	6.54418	7.19334	5.39451	7.10639	6.10165	3.58279	0.058381	0.352636
ENSG00000126883	nucleoporin 214kDa [Source:HGNC Symbol;Acc:8064]	NUP214	protein_coding	-2.95721	5.64038	1.41864	4.96762	4.27437	7.40465	4.21731	6.64847	3.5819	0.0584124	0.352636
ENSG00000165322	Rho GTPase activating protein 12 [Source:HGNC Symbol;Acc:16348]	ARHGAP12	protein_coding	-2.38573	7.25796	3.22599	6.00521	6.01074	8.93161	5.94064	8.08034	3.58101	0.0584436	0.352636
ENSG00000102471	Nedd4 family interacting protein 2 [Source:HGNC Symbol;Acc:18537]	NDFIP2	protein_coding	2.37383	7.00423	10.4644	5.98931	6.5777	5.61889	7.46024	5.82144	3.58088	0.0584482	0.352636
ENSG00000117289	thioredoxin interacting protein [Source:HGNC Symbol;Acc:16952]	TXNIP	protein_coding	-2.19407	9.41729	1.41864	8.2536	8.63033	10.8097	8.53482	10.0377	3.57885	0.0585196	0.352749
ENSG00000078177	NEDD4 binding protein 2 [Source:HGNC Symbol;Acc:29851]	N4BP2	protein_coding	3.9485	4.39806	2.40414	3.99626	4.70072	1.92169	4.64646	3.27053	3.57575	0.058629	0.352785
ENSG00000248323	lung cancer associated transcript 1 (non-protein coding) [Source:HGNC Symbol;Acc:48498]	LUCAT1	lincRNA	3.99994	5.00177	1.41864	5.44674	5.13248	2.08021	5.06167	4.64722	3.57534	0.0586435	0.352785
ENSG00000147687	TatD DNase domain containing 1 [Source:HGNC Symbol;Acc:24220]	TATDN1	protein_coding	2.5755	5.03506	1.41864	3.3388	5.40113	3.45198	5.32933	3.3945	3.57421	0.0586835	0.352785
ENSG00000140263	sorbitol dehydrogenase [Source:HGNC Symbol;Acc:11184]	SORD	protein_coding	3.86274	6.73348	1.41864	4.64931	7.1058	3.57146	7.01785	4.20029	3.56685	0.058944	0.353574
ENSG00000130338	tubby like protein 4 [Source:HGNC Symbol;Acc:15530]	TULP4	protein_coding	-2.10135	4.69501	1.41864	4.7749	3.7665	6.33544	3.71299	5.73956	3.56625	0.0589654	0.353574
ENSG00000136193	secernin 1 [Source:HGNC Symbol;Acc:22192]	SCRN1	protein_coding	-2.88478	5.05068	1.41864	2.96154	3.50316	6.86142	3.45552	5.95646	3.56507	0.0590073	0.353574
ENSG00000197157	staphylococcal nuclease and tudor domain containing 1 [Source:HGNC Symbol;Acc:30646]	SND1	protein_coding	3.3169	7.30136	1.41864	6.7622	7.49281	4.93818	7.40296	6.13431	3.56429	0.059035	0.353574
ENSG00000141580	WD repeat domain 45B [Source:HGNC Symbol;Acc:25072]	WDR45B	protein_coding	2.5133	3.81215	1.41864	1.70047	4.29883	2.65168	4.24004	2.24344	3.56299	0.0590812	0.353574
ENSG00000148229	polymerase (DNA directed), epsilon 3, accessory subunit [Source:HGNC Symbol;Acc:13546]	POLE3	protein_coding	-3.44243	5.80306	1.41864	5.16031	4.10474	7.99901	4.0514	7.10409	3.56159	0.0591311	0.353574
ENSG00000165832	TruB pseudouridine (psi) synthase family member 1 [Source:HGNC Symbol;Acc:16060]	TRUB1	protein_coding	6.11487	3.7255	1.41864	4.19052	3.82693	0.759341	3.77572	3.47194	3.56004	0.0591862	0.353588
ENSG00000188895	male-specific lethal 1 homolog (Drosophila) [Source:HGNC Symbol;Acc:27905]	MSL1	protein_coding	2.76792	5.61125	3.37655	6.5754	5.51273	3.26716	5.45338	5.7495	3.55786	0.0592641	0.353738
ENSG00000072501	structural maintenance of chromosomes 1A [Source:HGNC Symbol;Acc:11111]	SMC1A	protein_coding	-3.04025	6.62017	1.41864	4.69557	5.11132	8.68727	5.04422	7.78752	3.55492	0.0593692	0.35405
ENSG00000173702	mucin 13, cell surface associated [Source:HGNC Symbol;Acc:7511]	MUC13	protein_coding	-3.74569	3.78995	1.41864	1.11446	1.67774	6.0321	1.66582	5.10266	3.55119	0.0595029	0.354532
ENSG00000137171	kinesin light chain 4 [Source:HGNC Symbol;Acc:21624]	KLC4	protein_coding	-1.16114	4.50603	5.66239	5.49077	3.36174	5.76118	3.56851	5.63133	3.54254	0.0598139	0.356068
ENSG00000162825	neuroblastoma breakpoint family, member 8 [Source:HGNC Symbol;Acc:31990]	NBPF8	protein_coding	-1.58077	8.26556	6.35174	9.54024	6.60979	8.73527	6.59513	9.19353	3.53943	0.059926	0.356382
ENSG00000166123	glutamic pyruvate transaminase (alanine aminotransferase) 2 [Source:HGNC Symbol;Acc:18062]	GPT2	protein_coding	2.53228	4.23716	2.75492	4.38532	4.7709	2.60991	4.71676	3.74916	3.53813	0.0599729	0.356382
ENSG00000101343	crooked neck pre-mRNA splicing factor 1 [Source:HGNC Symbol;Acc:15762]	CRNKL1	protein_coding	5.51559	5.55599	1.41864	6.95032	5.72067	1.47971	5.64251	6.01292	3.53569	0.0600612	0.35659
ENSG00000059588	TAR (HIV-1) RNA binding protein 1 [Source:HGNC Symbol;Acc:11568]	TARBP1	protein_coding	-1.59119	5.67692	5.48817	6.40724	4.50472	7.25067	4.56611	6.88962	3.53322	0.060151	0.35662
ENSG00000205403	complement factor I [Source:HGNC Symbol;Acc:5394]	CFI	protein_coding	2.9173	5.81268	2.74345	7.37522	5.68594	3.38912	5.61777	6.45053	3.53196	0.0601965	0.35662
ENSG00000177150	family with sequence similarity 210, member A [Source:HGNC Symbol;Acc:28346]	FAM210A	protein_coding	3.70411	5.22832	1.41864	4.13324	5.67863	2.66393	5.60461	3.55026	3.53115	0.0602258	0.35662
ENSG00000257529	RPL36A-HNRNPH2 readthrough [Source:HGNC Symbol;Acc:48349]	RPL36A-HNRNPH2	protein_coding	2.24714	5.32792	1.41864	3.89103	5.6931	3.9138	5.61813	3.90068	3.52454	0.0604664	0.356821
ENSG00000129250	kinesin family member 1C [Source:HGNC Symbol;Acc:6317]	KIF1C	protein_coding	2.07424	4.77997	5.28357	3.93036	4.82171	3.7121	4.84569	3.82197	3.52378	0.0604944	0.356821
ENSG00000074356	chromosome 17 open reading frame 85 [Source:HGNC Symbol;Acc:24612]	C17orf85	protein_coding	3.28573	5.59018	8.41864	2.80249	5.50737	4.1664	5.93711	3.6335	3.5237	0.0604972	0.356821
ENSG00000115020	phosphoinositide kinase, FYVE finger containing [Source:HGNC Symbol;Acc:23785]	PIKFYVE	protein_coding	-1.96351	4.42752	2.34084	3.56789	3.38554	6.51886	3.35471	5.64003	3.52161	0.0605737	0.356821
ENSG00000189067	lipopolysaccharide-induced TNF factor [Source:HGNC Symbol;Acc:16841]	LITAF	protein_coding	-2.11749	6.86364	8.97323	7.77593	4.4168	8.17204	5.54427	7.98649	3.52124	0.0605871	0.356821
ENSG00000179820	myeloid-associated differentiation marker [Source:HGNC Symbol;Acc:7544]	MYADM	protein_coding	2.82978	6.64423	4.74129	5.98379	7.05063	4.85314	6.97942	5.56184	3.52018	0.0606258	0.356821
ENSG00000121289	centrosomal protein 89kDa [Source:HGNC Symbol;Acc:25907]	CEP89	protein_coding	3.41327	5.80294	2.79437	3.97709	6.24221	3.60129	6.16561	3.79929	3.52	0.0606324	0.356821
ENSG00000115875	serine/arginine-rich splicing factor 7 [Source:HGNC Symbol;Acc:10789]	SRSF7	protein_coding	-2.33452	7.136	2.0036	8.80822	5.61429	8.36425	5.54209	8.60473	3.51437	0.0608387	0.357721
ENSG00000126561	signal transducer and activator of transcription 5A [Source:HGNC Symbol;Acc:11366]	STAT5A	protein_coding	9.34054	5.64398	1.41864	6.09175	5.82637	0.64477	5.73792	5.12857	3.51228	0.0609156	0.357837
ENSG00000110395	Cbl proto-oncogene, E3 ubiquitin protein ligase [Source:HGNC Symbol;Acc:1541]	CBL	protein_coding	5.52793	4.46915	1.41864	1.17085	5.0978	1.25809	5.0292	1.20923	3.51093	0.0609652	0.357837
ENSG00000121060	tripartite motif containing 25 [Source:HGNC Symbol;Acc:12932]	TRIM25	protein_coding	3.57523	5.26697	5.0625	5.09724	5.60809	2.30292	5.58262	4.35925	3.50903	0.0610352	0.357934
ENSG00000166004	KIAA1731 [Source:HGNC Symbol;Acc:29366]	KIAA1731	protein_coding	-2.59813	4.99279	1.97446	6.48642	2.95411	5.6163	2.92514	6.13948	3.50309	0.0612546	0.358442
ENSG00000154556	sorbin and SH3 domain containing 2 [Source:HGNC Symbol;Acc:24098]	SORBS2	protein_coding	-2.28306	7.79983	4.5061	8.98019	6.64527	9.28552	6.57435	9.13943	3.50065	0.0613446	0.358442
ENSG00000234545	family with sequence similarity 133, member B [Source:HGNC Symbol;Acc:28629]	FAM133B	protein_coding	-1.60395	5.66831	2.99395	6.83743	4.8029	6.75239	4.75073	6.79499	3.50039	0.0613545	0.358442
ENSG00000137960	GIPC PDZ domain containing family, member 2 [Source:HGNC Symbol;Acc:18177]	GIPC2	protein_coding	4.0703	6.91853	3.41864	3.65306	7.34394	3.62377	7.25933	3.63762	3.49977	0.0613775	0.358442
ENSG00000087086	ferritin, light polypeptide [Source:HGNC Symbol;Acc:3999]	FTL	protein_coding	1.31517	12.6766	13.2743	10.5337	12.9434	12.7688	12.9679	12.0459	3.49861	0.0614203	0.358442
ENSG00000173065	family with sequence similarity 222, member B [Source:HGNC Symbol;Acc:25563]	FAM222B	protein_coding	4.65633	3.14899	1.41864	4.53339	3.0442	0.866051	3.00613	3.5878	3.49801	0.0614426	0.358442
ENSG00000160201	U2 small nuclear RNA auxiliary factor 1 [Source:HGNC Symbol;Acc:12453]	U2AF1	protein_coding	-1.71534	5.37194	4.55039	3.8585	4.03026	7.60853	4.05463	6.65226	3.49291	0.0616323	0.359236
ENSG00000092036	HAUS augmin-like complex, subunit 4 [Source:HGNC Symbol;Acc:20163]	HAUS4	protein_coding	4.33779	4.61964	4.0036	1.08103	5.15669	2.14225	5.11522	1.66877	3.48226	0.0620299	0.36118
ENSG00000102910	lon peptidase 2, peroxisomal [Source:HGNC Symbol;Acc:20598]	LONP2	protein_coding	-1.77335	8.00911	3.73189	8.57014	6.95006	9.36826	6.87161	9.0196	3.4811	0.0620736	0.36118
ENSG00000214941	zinc finger, SWIM-type containing 7 [Source:HGNC Symbol;Acc:26993]	ZSWIM7	protein_coding	-1.8117	5.70964	4.8375	5.87233	4.56979	7.10799	4.58121	6.62748	3.47781	0.0621968	0.361583
ENSG00000163161	excision repair cross-complementing rodent repair deficiency, complementation group 3 [Source:HGNC Symbol;Acc:3435]	ERCC3	protein_coding	-3.74086	6.02826	1.41864	7.38889	2.36468	6.82026	2.33873	7.13135	3.47604	0.0622637	0.361658
ENSG00000128923	family with sequence similarity 63, member B [Source:HGNC Symbol;Acc:26954]	FAM63B	protein_coding	-1.532	6.73469	6.50928	6.96154	5.85097	8.31226	5.89464	7.76319	3.47145	0.0624364	0.362348
ENSG00000164975	small nuclear RNA activating complex, polypeptide 3, 50kDa [Source:HGNC Symbol;Acc:11136]	SNAPC3	protein_coding	2.48619	5.6654	4.31394	3.25949	6.27213	4.1588	6.20305	3.7713	3.46996	0.0624926	0.36236
ENSG00000124767	glyoxalase I [Source:HGNC Symbol;Acc:4323]	GLO1	protein_coding	-2.3822	6.53253	1.41864	4.8598	5.58054	8.15003	5.50687	7.29808	3.46553	0.0626605	0.362449
ENSG00000136731	UDP-glucose glycoprotein glucosyltransferase 1 [Source:HGNC Symbol;Acc:15663]	UGGT1	protein_coding	-1.18354	6.41063	6.44012	6.37706	5.53788	7.98084	5.6017	7.39546	3.46447	0.0627007	0.362449
ENSG00000196689	transient receptor potential cation channel, subfamily V, member 1 [Source:HGNC Symbol;Acc:12716]	TRPV1	protein_coding	-1.32075	3.73833	5.27911	4.29903	2.43494	5.04547	2.70838	4.72937	3.46402	0.0627178	0.362449
ENSG00000163444	transmembrane protein 183A [Source:HGNC Symbol;Acc:20173]	TMEM183A	protein_coding	-2.76752	4.16766	2.0036	5.51173	2.72454	5.24187	2.70199	5.38193	3.46369	0.0627301	0.362449
ENSG00000035928	replication factor C (activator 1) 1, 145kDa [Source:HGNC Symbol;Acc:9969]	RFC1	protein_coding	1.69626	6.33447	9.67838	7.37691	5.54168	5.07417	6.50893	6.64389	3.46129	0.0628212	0.362449
ENSG00000196924	filamin A, alpha [Source:HGNC Symbol;Acc:3754]	FLNA	protein_coding	-3.68765	4.58548	1.41864	4.92385	2.77115	6.37807	2.73733	5.83056	3.461	0.0628323	0.362449
ENSG00000204525	major histocompatibility complex, class I, C [Source:HGNC Symbol;Acc:4933]	HLA-C	protein_coding	-1.63469	6.74513	5.10626	7.79011	5.48226	7.80946	5.46307	7.79968	3.4592	0.0629007	0.362531
ENSG00000160216	1-acylglycerol-3-phosphate O-acyltransferase 3 [Source:HGNC Symbol;Acc:326]	AGPAT3	protein_coding	-2.42871	4.56291	1.41864	6.37509	3.01571	5.7501	2.97651	6.08115	3.45772	0.0629572	0.362545
ENSG00000151012	solute carrier family 7 (anionic amino acid transporter light chain, xc- system), member 11 [Source:HGNC Symbol;Acc:11059]	SLC7A11	protein_coding	-1.66108	6.20123	3.75063	3.35225	5.38533	8.18207	5.33304	7.23676	3.45342	0.0631209	0.363091
ENSG00000125482	transcription termination factor, RNA polymerase I [Source:HGNC Symbol;Acc:12397]	TTF1	protein_coding	-2.18217	4.49438	2.74633	5.41136	3.11087	5.73574	3.09589	5.58149	3.45239	0.0631604	0.363091
ENSG00000197594	ectonucleotide pyrophosphatase/phosphodiesterase 1 [Source:HGNC Symbol;Acc:3356]	ENPP1	protein_coding	3.3049	6.86618	1.78041	3.38865	7.21357	4.79359	7.1254	4.23859	3.44847	0.0633102	0.363641
ENSG00000111331	2'-5'-oligoadenylate synthetase 3, 100kDa [Source:HGNC Symbol;Acc:8088]	OAS3	protein_coding	-1.5083	4.13428	3.95966	3.90473	3.06146	5.39326	3.10521	4.82657	3.44382	0.0634888	0.364354
ENSG00000074410	carbonic anhydrase XII [Source:HGNC Symbol;Acc:1371]	CA12	protein_coding	4.59539	7.53485	1.41864	8.15312	6.97766	3.3588	6.89036	7.22927	3.42738	0.0641236	0.367525
ENSG00000104419	N-myc downstream regulated 1 [Source:HGNC Symbol;Acc:7679]	NDRG1	protein_coding	2.97594	5.03078	6.75849	0.473073	5.0622	4.35713	5.21563	3.43277	3.42653	0.0641569	0.367525
ENSG00000166900	syntaxin 3 [Source:HGNC Symbol;Acc:11438]	STX3	protein_coding	-2.94954	6.04331	1.41864	6.53325	4.54203	7.75329	4.48245	7.23666	3.42527	0.0642058	0.367525
ENSG00000133401	PDZ domain containing 2 [Source:HGNC Symbol;Acc:18486]	PDZD2	protein_coding	2.70316	3.8567	1.48903	2.819	4.14363	2.27633	4.08969	2.57294	3.42228	0.0643221	0.367697
ENSG00000130726	tripartite motif containing 28 [Source:HGNC Symbol;Acc:16384]	TRIM28	protein_coding	3.37826	3.8641	1.41864	3.70884	3.99139	1.85561	3.93977	3.13691	3.42136	0.0643579	0.367697
ENSG00000131043	AAR2 splicing factor homolog (S. cerevisiae) [Source:HGNC Symbol;Acc:15886]	AAR2	protein_coding	8.27274	5.26688	1.41864	1.38709	5.72432	0.760197	5.64872	1.11899	3.42027	0.0644005	0.367697
ENSG00000010219	dual-specificity tyrosine-(Y)-phosphorylation regulated kinase 4 [Source:HGNC Symbol;Acc:3095]	DYRK4	protein_coding	5.51977	5.10377	1.41864	0.353986	5.43953	1.57538	5.36866	1.04062	3.41746	0.0645101	0.367872
ENSG00000108666	chromosome 17 open reading frame 75 [Source:HGNC Symbol;Acc:30173]	C17orf75	protein_coding	7.77243	4.61643	1.41864	6.00356	4.26969	0.64477	4.21345	5.17001	3.41668	0.0645408	0.367872
ENSG00000124222	syntaxin 16 [Source:HGNC Symbol;Acc:11431]	STX16	protein_coding	-1.6127	5.53216	5.09502	5.94091	4.50995	6.70925	4.54004	6.37084	3.41251	0.0647038	0.368341
ENSG00000158290	cullin 4B [Source:HGNC Symbol;Acc:2555]	CUL4B	protein_coding	3.97446	4.51285	1.41864	4.29096	4.78087	1.61407	4.717	3.58745	3.41177	0.0647331	0.368341
ENSG00000156531	PHD finger protein 6 [Source:HGNC Symbol;Acc:18145]	PHF6	protein_coding	2.29357	5.98552	4.86688	5.26343	6.36626	4.51234	6.30766	4.94321	3.40903	0.0648406	0.368626
ENSG00000125354	septin 6 [Source:HGNC Symbol;Acc:15848]	SEPT6	protein_coding	-3.96776	4.5883	7.91849	5.70491	0.625752	5.46965	3.39662	5.60703	3.40752	0.0649	0.368626
ENSG00000131469	ribosomal protein L27 [Source:HGNC Symbol;Acc:10328]	RPL27	protein_coding	1.32654	8.73528	7.77619	8.26138	8.83315	8.18049	8.78377	8.22179	3.40415	0.0650325	0.368626
ENSG00000100418	desumoylating isopeptidase 1 [Source:HGNC Symbol;Acc:24577]	DESI1	protein_coding	-1.33581	5.40762	4.96769	5.38828	4.44942	6.94011	4.4755	6.35748	3.40307	0.065075	0.368626
ENSG00000125968	inhibitor of DNA binding 1, dominant negative helix-loop-helix protein [Source:HGNC Symbol;Acc:5360]	ID1	protein_coding	-3.7638	4.23576	1.41864	5.29037	1.83012	5.27572	1.81504	5.28277	3.40238	0.0651024	0.368626
ENSG00000151914	dystonin [Source:HGNC Symbol;Acc:1090]	DST	protein_coding	-1.46739	9.57806	5.95966	10.2486	8.8284	10.8301	8.74559	10.5689	3.40095	0.0651589	0.368626
ENSG00000085491	solute carrier family 25 (mitochondrial carrier; phosphate carrier), member 24 [Source:HGNC Symbol;Acc:20662]	SLC25A24	protein_coding	4.67012	5.2218	1.41864	4.25529	5.90572	2.10788	5.82592	3.58323	3.40011	0.065192	0.368626
ENSG00000122378	family with sequence similarity 213, member A [Source:HGNC Symbol;Acc:28651]	FAM213A	protein_coding	-2.5315	5.46691	1.41864	4.78589	4.21549	7.77717	4.15939	6.90565	3.39932	0.0652232	0.368626
ENSG00000117298	endothelin converting enzyme 1 [Source:HGNC Symbol;Acc:3146]	ECE1	protein_coding	3.0734	4.71412	2.44367	5.18346	4.9012	2.23087	4.8426	4.34085	3.39508	0.0653913	0.36908
ENSG00000196850	PTC7 protein phosphatase homolog (S. cerevisiae) [Source:HGNC Symbol;Acc:30695]	PPTC7	protein_coding	5.58774	4.58914	1.41864	2.63943	5.14707	1.30835	5.07807	2.15502	3.39452	0.0654136	0.36908
ENSG00000105193	ribosomal protein S16 [Source:HGNC Symbol;Acc:10396]	RPS16	protein_coding	1.49199	8.48556	8.16482	8.29035	8.47151	7.58949	8.45351	7.98239	3.39302	0.0654731	0.369105
ENSG00000162692	vascular cell adhesion molecule 1 [Source:HGNC Symbol;Acc:12663]	VCAM1	protein_coding	-1.13697	4.5998	1.41864	7.49148	-0.0931393	0.64477	-0.0292957	6.50738	3.3881	0.0656687	0.369727
ENSG00000260088		RP11-92G12.3	lincRNA	-1.25026	4.00754	4.53966	5.4268	2.79341	4.76144	2.90463	5.13211	3.38582	0.0657596	0.369727
ENSG00000158769	F11 receptor [Source:HGNC Symbol;Acc:14685]	F11R	protein_coding	1.22739	8.42926	10.5212	7.58991	8.17892	8.26497	8.51203	7.96683	3.38533	0.0657789	0.369727
ENSG00000064995	TAF11 RNA polymerase II, TATA box binding protein (TBP)-associated factor, 28kDa [Source:HGNC Symbol;Acc:11544]	TAF11	protein_coding	-2.74088	4.64253	1.41864	3.00769	3.3012	7.00321	3.25867	6.06583	3.38306	0.0658696	0.369727
ENSG00000213281	neuroblastoma RAS viral (v-ras) oncogene homolog [Source:HGNC Symbol;Acc:7989]	NRAS	protein_coding	4.51808	5.66542	1.41864	6.49286	5.7823	2.10827	5.70498	5.6411	3.38253	0.065891	0.369727
ENSG00000177576	chromosome 18 open reading frame 32 [Source:HGNC Symbol;Acc:31690]	C18orf32	protein_coding	-2.39833	5.85196	1.41864	6.68697	4.08461	6.74846	4.03068	6.71709	3.38194	0.0659142	0.369727
ENSG00000127995	CAS1 domain containing 1 [Source:HGNC Symbol;Acc:16014]	CASD1	protein_coding	7.23676	4.46946	1.41864	5.0183	4.7146	0.760049	4.63584	4.10681	3.3797	0.0660042	0.369921
ENSG00000132471	WW domain binding protein 2 [Source:HGNC Symbol;Acc:12738]	WBP2	protein_coding	1.80878	6.12296	8.01855	5.87852	6.27105	5.42445	6.45267	5.66371	3.37582	0.0661596	0.370262
ENSG00000104093	Dmx-like 2 [Source:HGNC Symbol;Acc:2938]	DMXL2	protein_coding	2.81236	6.14941	3.0036	0.353986	6.57697	5.74009	6.4959	4.68059	3.37543	0.0661755	0.370262
ENSG00000105953	oxoglutarate (alpha-ketoglutarate) dehydrogenase (lipoamide) [Source:HGNC Symbol;Acc:8124]	OGDH	protein_coding	-1.33376	3.63451	2.92453	4.96982	2.57103	4.35601	2.58089	4.70014	3.37393	0.0662355	0.370289
ENSG00000171236	leucine-rich alpha-2-glycoprotein 1 [Source:HGNC Symbol;Acc:29480]	LRG1	protein_coding	3.75151	5.41465	1.41864	6.45946	4.41434	1.90048	4.35592	5.56518	3.3719	0.0663171	0.370353
ENSG00000122026	ribosomal protein L21 [Source:HGNC Symbol;Acc:10313]	RPL21	protein_coding	1.18531	9.95635	10.3544	8.51531	10.0061	9.77152	10.0316	9.27488	3.3709	0.0663574	0.370353
ENSG00000107951	mitochondrial poly(A) polymerase [Source:HGNC Symbol;Acc:25532]	MTPAP	protein_coding	-2.01063	6.94141	5.0404	6.05016	5.82086	8.74234	5.78703	7.94253	3.3694	0.0664179	0.370382
ENSG00000163624	CDP-diacylglycerol synthase (phosphatidate cytidylyltransferase) 1 [Source:HGNC Symbol;Acc:1800]	CDS1	protein_coding	-3.73131	4.03413	1.41864	5.2693	2.16697	5.61044	2.1451	5.43238	3.36632	0.0665422	0.370767
ENSG00000181264	transmembrane protein 136 [Source:HGNC Symbol;Acc:28280]	TMEM136	protein_coding	2.93171	5.03259	1.93969	5.51824	5.27134	2.51309	5.20324	4.6582	3.36338	0.0666612	0.371121
ENSG00000135457	transcription factor CP2 [Source:HGNC Symbol;Acc:11748]	TFCP2	protein_coding	3.46983	3.31881	2.41864	0.353986	3.73333	2.00026	3.6914	1.3376	3.35463	0.0670161	0.372628
ENSG00000029363	BCL2-associated transcription factor 1 [Source:HGNC Symbol;Acc:16863]	BCLAF1	protein_coding	1.45766	7.89365	9.97706	8.515	7.50393	6.69593	7.86677	7.87262	3.34996	0.0672066	0.372628
ENSG00000241644	indolethylamine N-methyltransferase [Source:HGNC Symbol;Acc:6069]	INMT	protein_coding	-1.35604	4.47895	2.8516	6.08903	3.31895	5.25131	3.30027	5.72345	3.34987	0.0672103	0.372628
ENSG00000203499	FAM83H antisense RNA 1 (head to head) [Source:HGNC Symbol;Acc:48720]	FAM83H-AS1	lincRNA	-1.13406	3.04509	5.14765	3.50886	1.68404	4.31788	2.07649	3.96081	3.34911	0.0672414	0.372628
ENSG00000117054	acyl-CoA dehydrogenase, C-4 to C-12 straight chain [Source:HGNC Symbol;Acc:89]	ACADM	protein_coding	-3.0045	5.12622	1.41864	6.23059	3.66614	6.48966	3.61805	6.36799	3.34875	0.0672559	0.372628
ENSG00000149115	tankyrase 1 binding protein 1, 182kDa [Source:HGNC Symbol;Acc:19081]	TNKS1BP1	protein_coding	-3.57762	3.61096	1.41864	4.81713	1.78924	5.41377	1.77567	5.14621	3.34721	0.0673191	0.372628
ENSG00000172382	protease, serine 27 [Source:HGNC Symbol;Acc:15475]	PRSS27	protein_coding	-1.31992	3.97171	4.10121	5.22962	2.50161	4.17687	2.59276	4.8061	3.34716	0.0673211	0.372628
ENSG00000183828	nudix (nucleoside diphosphate linked moiety X)-type motif 14 [Source:HGNC Symbol;Acc:20141]	NUDT14	protein_coding	-1.12399	3.9277	5.19895	4.66727	2.72336	5.00539	2.93906	4.84539	3.33276	0.0679127	0.374875
ENSG00000183431	splicing factor 3a, subunit 3, 60kDa [Source:HGNC Symbol;Acc:10767]	SF3A3	protein_coding	-3.08255	6.67361	1.41864	6.60017	4.98418	7.96909	4.91753	7.43914	3.3323	0.067932	0.374875
ENSG00000170906	NADH dehydrogenase (ubiquinone) 1 alpha subcomplex, 3, 9kDa [Source:HGNC Symbol;Acc:7686]	NDUFA3	protein_coding	-1.36322	4.91076	3.62653	5.494	3.94328	5.92991	3.92895	5.72424	3.33049	0.0680066	0.374875
ENSG00000108846	ATP-binding cassette, sub-family C (CFTR/MRP), member 3 [Source:HGNC Symbol;Acc:54]	ABCC3	protein_coding	-1.534	6.01894	4.88592	7.49953	4.86062	7.01915	4.85984	7.27693	3.32886	0.0680739	0.374875
ENSG00000126106	transmembrane protein 53 [Source:HGNC Symbol;Acc:26186]	TMEM53	protein_coding	2.90513	5.30921	2.76063	5.49307	5.26331	2.80185	5.20214	4.75738	3.32715	0.068145	0.374875
ENSG00000188000	olfactory receptor, family 7, subfamily D, member 2 [Source:HGNC Symbol;Acc:8378]	OR7D2	protein_coding	-1.2842	3.3035	2.99637	4.76005	2.1262	3.76373	2.15975	4.33893	3.32664	0.0681659	0.374875
ENSG00000157764	v-raf murine sarcoma viral oncogene homolog B [Source:HGNC Symbol;Acc:1097]	BRAF	protein_coding	-2.81125	4.61892	1.41864	4.27119	3.24925	6.51731	3.20791	5.81049	3.32661	0.0681672	0.374875
ENSG00000111802	tyrosyl-DNA phosphodiesterase 2 [Source:HGNC Symbol;Acc:17768]	TDP2	protein_coding	-3.30206	4.95384	1.41864	5.17723	3.37359	7.02466	3.3292	6.36149	3.32606	0.0681899	0.374875
ENSG00000135900	mitochondrial ribosomal protein L44 [Source:HGNC Symbol;Acc:16650]	MRPL44	protein_coding	4.13583	5.1662	1.9891	4.68037	5.38775	2.33888	5.32001	4.01229	3.32458	0.0682515	0.374875
ENSG00000133657	ATPase type 13A3 [Source:HGNC Symbol;Acc:24113]	ATP13A3	protein_coding	-1.86728	7.60154	2.0036	6.35025	6.84375	9.30508	6.75888	8.46221	3.32374	0.0682862	0.374875
ENSG00000174282	zinc finger and BTB domain containing 4 [Source:HGNC Symbol;Acc:23847]	ZBTB4	protein_coding	5.66046	5.23589	1.41864	6.38114	5.00148	1.25716	4.93344	5.44405	3.32202	0.0683578	0.374961
ENSG00000166347	cytochrome b5 type A (microsomal) [Source:HGNC Symbol;Acc:2570]	CYB5A	protein_coding	2.09167	6.9921	4.16603	7.49929	6.91664	5.44279	6.84117	6.82134	3.31669	0.0685796	0.37514
ENSG00000186063	axin interactor, dorsalization associated [Source:HGNC Symbol;Acc:25761]	AIDA	protein_coding	-2.80327	4.8316	1.41864	6.33493	2.71678	6.11747	2.68439	6.23376	3.31652	0.0685867	0.37514
ENSG00000105357	myosin, heavy chain 14, non-muscle [Source:HGNC Symbol;Acc:23212]	MYH14	protein_coding	-1.58361	4.09583	4.60925	5.31503	2.31868	4.41967	2.48978	4.93595	3.31625	0.0685981	0.37514
ENSG00000005339	CREB binding protein [Source:HGNC Symbol;Acc:2348]	CREBBP	protein_coding	-1.71615	6.2185	4.11908	6.80777	5.25825	7.47551	5.21648	7.1832	3.31425	0.0686816	0.37514
ENSG00000187837	histone cluster 1, H1c [Source:HGNC Symbol;Acc:4716]	HIST1H1C	protein_coding	3.0445	6.11622	1.41864	5.35922	6.52692	3.75171	6.44398	4.7889	3.31167	0.0687897	0.37514
ENSG00000130202	poliovirus receptor-related 2 (herpesvirus entry mediator B) [Source:HGNC Symbol;Acc:9707]	PVRL2	protein_coding	-2.81864	4.29529	1.41864	7.04614	1.38159	3.97768	1.37846	6.16309	3.31159	0.0687929	0.37514
ENSG00000161011	sequestosome 1 [Source:HGNC Symbol;Acc:11280]	SQSTM1	protein_coding	2.32675	10.1323	3.55286	7.68714	10.4874	8.80198	10.3898	8.34442	3.31116	0.0688107	0.37514
ENSG00000081665	zinc finger protein 506 [Source:HGNC Symbol;Acc:23780]	ZNF506	protein_coding	-1.23914	5.81831	5.9763	7.26561	4.54399	6.52629	4.65493	6.95112	3.31051	0.0688382	0.37514
ENSG00000198223	colony stimulating factor 2 receptor, alpha, low-affinity (granulocyte-macrophage) [Source:HGNC Symbol;Acc:2435]	CSF2RA	protein_coding	-1.17923	4.41112	4.38673	5.43171	3.48199	5.31815	3.52838	5.37598	3.3027	0.0691663	0.376347
ENSG00000189334	S100 calcium binding protein A14 [Source:HGNC Symbol;Acc:18901]	S100A14	protein_coding	-3.68432	5.3273	1.41864	5.49626	3.45325	7.31398	3.4074	6.67362	3.30098	0.0692384	0.376347
ENSG00000140575	IQ motif containing GTPase activating protein 1 [Source:HGNC Symbol;Acc:6110]	IQGAP1	protein_coding	1.54052	8.57763	11.0498	8.07592	8.46573	8.22162	8.86889	8.1502	3.29874	0.069333	0.376347
ENSG00000163785	receptor-like tyrosine kinase [Source:HGNC Symbol;Acc:10481]	RYK	protein_coding	-2.77715	5.5521	1.41864	5.01029	4.34034	7.1428	4.28273	6.4229	3.29826	0.0693534	0.376347
ENSG00000145284	stearoyl-CoA desaturase 5 [Source:HGNC Symbol;Acc:21088]	SCD5	protein_coding	-1.40174	6.54252	8.26099	7.55297	4.99443	7.73288	5.56589	7.64516	3.29758	0.0693819	0.376347
ENSG00000158470	UDP-Gal:betaGlcNAc beta 1,4- galactosyltransferase, polypeptide 5 [Source:HGNC Symbol;Acc:928]	B4GALT5	protein_coding	-2.19114	4.92577	1.93466	6.05033	3.62622	6.11549	3.58448	6.08028	3.29724	0.0693965	0.376347
ENSG00000115109	erythrocyte membrane protein band 4.1 like 5 [Source:HGNC Symbol;Acc:19819]	EPB41L5	protein_coding	5.89148	5.09532	1.41864	4.98912	5.25534	1.30608	5.18548	4.15714	3.28811	0.0697833	0.378036
ENSG00000249459	zinc finger protein 286B [Source:HGNC Symbol;Acc:33241]	ZNF286B	protein_coding	3.08539	5.13811	4.71363	5.70424	5.11185	2.88608	5.09334	4.94962	3.28723	0.0698207	0.378036
ENSG00000163072	nitric oxide synthase trafficking [Source:HGNC Symbol;Acc:20203]	NOSTRIN	protein_coding	2.79381	4.39975	1.93969	2.82793	4.74137	2.54912	4.68013	2.70137	3.28553	0.0698932	0.378123
ENSG00000170946	DnaJ (Hsp40) homolog, subfamily C, member 24 [Source:HGNC Symbol;Acc:26979]	DNAJC24	protein_coding	2.75215	3.74962	3.89243	5.25964	2.89549	1.40677	2.94202	4.44563	3.28288	0.0700061	0.37837
ENSG00000157823	adaptor-related protein complex 3, sigma 2 subunit [Source:HGNC Symbol;Acc:571]	AP3S2	protein_coding	2.54435	4.87639	2.84087	5.03015	5.00819	2.87573	4.95146	4.39027	3.28181	0.0700518	0.37837
ENSG00000142910	tubulointerstitial nephritis antigen-like 1 [Source:HGNC Symbol;Acc:19168]	TINAGL1	protein_coding	-3.16596	4.77869	1.41864	5.83747	2.90774	6.25602	2.87352	6.05128	3.27235	0.0704565	0.379537
ENSG00000205246	ribosomal protein SA pseudogene 58 [Source:HGNC Symbol;Acc:36809]	RPSAP58	protein_coding	1.72308	4.56846	1.41864	3.96364	4.75158	3.59025	4.68894	3.80088	3.2723	0.070459	0.379537
ENSG00000175575	proteasomal ATPase-associated factor 1 [Source:HGNC Symbol;Acc:25687]	PAAF1	protein_coding	2.20184	4.38777	3.39133	2.66915	4.63928	3.42504	4.59889	3.08127	3.27227	0.0704601	0.379537
ENSG00000057019	discoidin, CUB and LCCL domain containing 2 [Source:HGNC Symbol;Acc:24627]	DCBLD2	protein_coding	-2.22169	6.34848	1.89372	7.29075	5.22995	7.71546	5.15997	7.5186	3.27147	0.0704943	0.379537
ENSG00000189091	splicing factor 3b, subunit 3, 130kDa [Source:HGNC Symbol;Acc:10770]	SF3B3	protein_coding	2.82562	6.30253	2.62965	4.30342	6.80652	4.42167	6.72403	4.36037	3.26658	0.0707048	0.380364
ENSG00000124733	male-enhanced antigen 1 [Source:HGNC Symbol;Acc:6986]	MEA1	protein_coding	3.34786	5.92064	1.41864	6.38602	5.75957	3.11167	5.68446	5.58322	3.26397	0.0708174	0.380665
ENSG00000136280	cerebral cavernous malformation 2 [Source:HGNC Symbol;Acc:21708]	CCM2	protein_coding	-1.38642	4.01086	4.05207	5.07471	2.36123	4.20303	2.45944	4.69377	3.26012	0.0709839	0.380733
ENSG00000139842	cullin 4A [Source:HGNC Symbol;Acc:2554]	CUL4A	protein_coding	3.95534	4.22164	1.41864	5.31833	4.29613	1.60535	4.23896	4.46796	3.25912	0.0710272	0.380733
ENSG00000162735	peroxisomal biogenesis factor 19 [Source:HGNC Symbol;Acc:9713]	PEX19	protein_coding	-3.98536	5.84775	1.41864	6.79782	3.71208	7.36801	3.66423	7.11181	3.25786	0.0710818	0.380733
ENSG00000159131	phosphoribosylglycinamide formyltransferase, phosphoribosylglycinamide synthetase, phosphoribosylaminoimidazole synthetase [Source:HGNC Symbol;Acc:4163]	GART	protein_coding	-2.25312	5.5134	2.42584	6.23461	4.37002	7.02587	4.31838	6.68746	3.25766	0.0710904	0.380733
ENSG00000129657	SEC14-like 1 (S. cerevisiae) [Source:HGNC Symbol;Acc:10698]	SEC14L1	protein_coding	2.5084	4.76607	1.74633	5.3212	4.89088	2.73979	4.82712	4.62483	3.25666	0.0711338	0.380733
ENSG00000204842	ataxin 2 [Source:HGNC Symbol;Acc:10555]	ATXN2	protein_coding	1.99038	5.57861	4.22805	5.08146	5.70968	4.3016	5.65878	4.74483	3.25581	0.0711709	0.380733
ENSG00000130772	mediator complex subunit 18 [Source:HGNC Symbol;Acc:25944]	MED18	protein_coding	1.1342	3.3878	6.29761	3.11213	2.9398	3.16006	3.37127	3.13353	3.25051	0.0714014	0.381662
ENSG00000057252	sterol O-acyltransferase 1 [Source:HGNC Symbol;Acc:11177]	SOAT1	protein_coding	3.24081	4.95449	1.41864	4.86679	5.14552	2.63831	5.07774	4.1593	3.24875	0.071478	0.381767
ENSG00000122406	ribosomal protein L5 [Source:HGNC Symbol;Acc:10360]	RPL5	protein_coding	1.87668	10.6845	8.42426	9.67406	10.9425	9.64367	10.8615	9.65892	3.24522	0.071632	0.382285
ENSG00000156011	pleckstrin and Sec7 domain containing 3 [Source:HGNC Symbol;Acc:19093]	PSD3	protein_coding	-3.23061	4.28044	1.41864	4.4564	2.59955	6.28385	2.56817	5.61876	3.24378	0.0716951	0.382317
ENSG00000131508	ubiquitin-conjugating enzyme E2D 2 [Source:HGNC Symbol;Acc:12475]	UBE2D2	protein_coding	-2.74698	5.204	1.41864	6.52893	3.04211	6.12638	3.00464	6.34362	3.24242	0.0717544	0.382329
ENSG00000145050	mesencephalic astrocyte-derived neurotrophic factor [Source:HGNC Symbol;Acc:15461]	MANF	protein_coding	4.7381	4.47827	1.41864	4.62848	4.56382	1.40311	4.50131	3.79527	3.23968	0.0718748	0.382666
ENSG00000164543	serine/threonine kinase 17a [Source:HGNC Symbol;Acc:11395]	STK17A	protein_coding	-2.69851	5.56066	3.0036	6.58998	3.90838	7.10649	3.87782	6.87386	3.23798	0.0719491	0.382758
ENSG00000076685	5'-nucleotidase, cytosolic II [Source:HGNC Symbol;Acc:8022]	NT5C2	protein_coding	2.29276	3.50966	3.39684	2.79749	3.68113	2.39435	3.66784	2.61709	3.23406	0.0721218	0.383372
ENSG00000008869	HEAT repeat containing 5B [Source:HGNC Symbol;Acc:29273]	HEATR5B	protein_coding	3.04555	4.77274	1.41864	3.79522	5.06112	2.80495	4.99431	3.41395	3.22302	0.0726095	0.385659
ENSG00000112874	nudix (nucleoside diphosphate linked moiety X)-type motif 12 [Source:HGNC Symbol;Acc:18826]	NUDT12	protein_coding	4.83214	4.82763	1.41864	3.02171	5.10701	1.42135	5.04031	2.4219	3.21873	0.0728	0.386365
ENSG00000133872	transmembrane protein 66 [Source:HGNC Symbol;Acc:28789]	TMEM66	protein_coding	2.37435	7.97535	1.41864	5.06898	8.6766	6.59545	8.57961	5.97901	3.21384	0.0730179	0.386997
ENSG00000177000	methylenetetrahydrofolate reductase (NAD(P)H) [Source:HGNC Symbol;Acc:7436]	MTHFR	protein_coding	2.35644	4.99179	2.91944	3.11738	5.19111	3.74337	5.13285	3.47278	3.21347	0.0730347	0.386997
ENSG00000133703	Kirsten rat sarcoma viral oncogene homolog [Source:HGNC Symbol;Acc:6407]	KRAS	protein_coding	3.14599	5.40409	1.41864	5.173	5.60072	3.13892	5.52761	4.52784	3.20978	0.0731991	0.387315
ENSG00000079385	carcinoembryonic antigen-related cell adhesion molecule 1 (biliary glycoprotein) [Source:HGNC Symbol;Acc:1814]	CEACAM1	protein_coding	-2.01079	5.98955	2.14982	6.38497	5.21993	7.50458	5.15511	7.05557	3.20954	0.0732102	0.387315
ENSG00000160752	farnesyl diphosphate synthase [Source:HGNC Symbol;Acc:3631]	FDPS	protein_coding	2.75812	5.93893	4.12683	7.92341	5.31182	2.94664	5.27006	6.98069	3.206	0.0733687	0.387602
ENSG00000179933	chromosome 14 open reading frame 119 [Source:HGNC Symbol;Acc:20270]	C14orf119	protein_coding	3.41584	6.50885	2.03688	6.72724	6.58036	4.01662	6.49783	5.97864	3.2056	0.0733864	0.387602
ENSG00000156831	non-SMC element 2, MMS21 homolog (S. cerevisiae) [Source:HGNC Symbol;Acc:26513]	NSMCE2	protein_coding	2.61594	4.28646	1.41864	4.46454	4.6676	2.44202	4.60277	3.84327	3.20377	0.0734686	0.387602
ENSG00000127831	villin 1 [Source:HGNC Symbol;Acc:12690]	VIL1	protein_coding	-3.20361	5.31238	1.41864	8.1725	1.65904	5.1217	1.64789	7.3142	3.20317	0.0734957	0.387602
ENSG00000117153	kelch-like family member 12 [Source:HGNC Symbol;Acc:19360]	KLHL12	protein_coding	5.67289	5.54549	1.41864	5.78997	5.80219	1.53943	5.72356	4.98529	3.19857	0.0737028	0.388167
ENSG00000105650	phosphodiesterase 4C, cAMP-specific [Source:HGNC Symbol;Acc:8782]	PDE4C	protein_coding	-1.23086	3.10927	3.71583	4.25633	1.96258	3.81057	2.06286	4.04994	3.19821	0.0737187	0.388167
ENSG00000148824	mitochondrial ribosome-associated GTPase 1 [Source:HGNC Symbol;Acc:32159]	MTG1	protein_coding	3.72491	5.85105	1.41864	7.2193	5.8122	2.95752	5.73406	6.26118	3.1926	0.0739723	0.389196
ENSG00000159023	erythrocyte membrane protein band 4.1 (elliptocytosis 1, RH-linked) [Source:HGNC Symbol;Acc:3377]	EPB41	protein_coding	2.4014	4.68711	3.36537	5.39771	4.48998	2.86752	4.45177	4.71903	3.18799	0.074181	0.389989
ENSG00000110768	general transcription factor IIH, polypeptide 1, 62kDa [Source:HGNC Symbol;Acc:4655]	GTF2H1	protein_coding	-3.13434	5.28952	1.41864	4.90198	3.72958	7.74942	3.68319	6.91192	3.18387	0.0743684	0.390407
ENSG00000113141	IK cytokine, down-regulator of HLA II [Source:HGNC Symbol;Acc:5958]	IK	protein_coding	-2.24071	6.15001	1.41864	5.82529	5.05117	7.80035	4.98411	7.12569	3.18368	0.0743771	0.390407
ENSG00000166783	KIAA0430 [Source:HGNC Symbol;Acc:29562]	KIAA0430	protein_coding	4.90165	4.40968	1.41864	5.18033	4.6483	1.3223	4.58736	4.32559	3.18208	0.0744498	0.390483
ENSG00000164663	ubiquitin specific peptidase 49 [Source:HGNC Symbol;Acc:20078]	USP49	protein_coding	-1.1042	3.63001	5.51245	4.73581	2.21146	4.49637	2.58585	4.62436	3.17952	0.0745666	0.390789
ENSG00000073331	alpha-kinase 1 [Source:HGNC Symbol;Acc:20917]	ALPK1	protein_coding	-2.51893	5.98127	1.41864	5.90159	4.87619	7.42385	4.81048	6.8635	3.17109	0.0749525	0.392463
ENSG00000143162	cellular repressor of E1A-stimulated genes 1 [Source:HGNC Symbol;Acc:2351]	CREG1	protein_coding	-2.44589	4.66706	1.41864	2.58466	3.7655	6.61961	3.71617	5.73009	3.16999	0.0750031	0.392463
ENSG00000139514	solute carrier family 7 (cationic amino acid transporter, y+ system), member 1 [Source:HGNC Symbol;Acc:11057]	SLC7A1	protein_coding	3.71081	4.68252	1.41864	1.94449	5.19408	2.359	5.1253	2.1481	3.16706	0.0751374	0.392859
ENSG00000152556	phosphofructokinase, muscle [Source:HGNC Symbol;Acc:8877]	PFKM	protein_coding	-1.40257	5.95608	6.59895	6.07783	4.6725	7.54996	4.85697	7.00847	3.16198	0.0753719	0.393691
ENSG00000163170	bolA family member 3 [Source:HGNC Symbol;Acc:24415]	BOLA3	protein_coding	2.60763	4.27351	1.41864	3.22306	4.46961	2.62729	4.41032	2.97039	3.16107	0.0754139	0.393691
ENSG00000196172	zinc finger protein 681 [Source:HGNC Symbol;Acc:26457]	ZNF681	protein_coding	3.00042	4.71381	1.41864	4.24669	4.97007	2.76959	4.90565	3.72947	3.15691	0.075606	0.394368
ENSG00000105810	cyclin-dependent kinase 6 [Source:HGNC Symbol;Acc:1777]	CDK6	protein_coding	-3.84578	5.55544	1.41864	7.78256	2.25478	6.21298	2.23034	7.19684	3.15572	0.0756613	0.394368
ENSG00000128641	myosin IB [Source:HGNC Symbol;Acc:7596]	MYO1B	protein_coding	-1.89613	7.35137	1.41864	7.92989	6.363	8.78082	6.28059	8.41532	3.15314	0.0757811	0.394457
ENSG00000074054	cytoplasmic linker associated protein 1 [Source:HGNC Symbol;Acc:17088]	CLASP1	protein_coding	-2.43435	6.76967	3.0036	7.79171	5.10791	7.86023	5.05013	7.82629	3.15282	0.0757959	0.394457
ENSG00000087266	SH3-domain binding protein 2 [Source:HGNC Symbol;Acc:10825]	SH3BP2	protein_coding	-1.39419	4.1487	4.03335	5.02708	3.25665	5.23462	3.29163	5.13429	3.14982	0.0759353	0.394875
ENSG00000127463	ER membrane protein complex subunit 1 [Source:HGNC Symbol;Acc:28957]	EMC1	protein_coding	-1.62949	5.22814	3.34654	4.12294	4.38146	7.28557	4.34712	6.43593	3.14696	0.0760687	0.395263
ENSG00000171867	prion protein [Source:HGNC Symbol;Acc:9449]	PRNP	protein_coding	-3.52494	5.55012	1.41864	7.37026	3.14944	6.74261	3.1104	7.08609	3.14528	0.0761471	0.395363
ENSG00000122203	KIAA1191 [Source:HGNC Symbol;Acc:29209]	KIAA1191	protein_coding	1.88028	6.25995	5.65398	6.76232	6.16982	5.05659	6.14424	6.16028	3.1429	0.0762582	0.395531
ENSG00000134815	DEAH (Asp-Glu-Ala-His) box polypeptide 34 [Source:HGNC Symbol;Acc:16719]	DHX34	protein_coding	2.70091	4.45627	3.88853	5.16659	3.91873	2.20334	3.91464	4.28198	3.14206	0.0762974	0.395531
ENSG00000196275	GTF2I repeat domain containing 2 [Source:HGNC Symbol;Acc:30775]	GTF2IRD2	protein_coding	-1.14779	4.32415	5.7592	5.40813	3.02002	5.24976	3.30835	5.3273	3.13951	0.076417	0.395845
ENSG00000006432	mitogen-activated protein kinase kinase kinase 9 [Source:HGNC Symbol;Acc:6861]	MAP3K9	protein_coding	-1.88413	5.24019	2.79715	3.40345	4.41697	6.77213	4.36667	5.91189	3.1354	0.0766096	0.396341
ENSG00000129680	MAP7 domain containing 3 [Source:HGNC Symbol;Acc:25742]	MAP7D3	protein_coding	1.48511	6.32653	7.01289	5.85863	6.50412	5.7829	6.5391	5.82148	3.13404	0.0766736	0.396341
ENSG00000198668	calmodulin 1 (phosphorylase kinase, delta) [Source:HGNC Symbol;Acc:1442]	CALM1	protein_coding	1.22348	8.32834	10.7029	7.84382	8.00576	8.09963	8.43948	7.97574	3.13246	0.0767477	0.396341
ENSG00000121858	tumor necrosis factor (ligand) superfamily, member 10 [Source:HGNC Symbol;Acc:11925]	TNFSF10	protein_coding	-1.79579	7.73903	9.96661	8.99789	5.39141	8.51088	6.60417	8.77315	3.13243	0.0767493	0.396341
ENSG00000141380	synovial sarcoma translocation, chromosome 18 [Source:HGNC Symbol;Acc:11340]	SS18	protein_coding	3.29328	5.70368	2.12793	5.30719	6.15658	3.31177	6.07694	4.66982	3.12987	0.0768697	0.396657
ENSG00000170889	ribosomal protein S9 [Source:HGNC Symbol;Acc:10442]	RPS9	protein_coding	2.33321	6.01047	4.33512	4.71481	6.29173	4.65596	6.22909	4.68567	3.12621	0.0770427	0.397244
ENSG00000184292	tumor-associated calcium signal transducer 2 [Source:HGNC Symbol;Acc:11530]	TACSTD2	protein_coding	-2.20647	6.73581	1.41864	8.29654	4.84067	7.29708	4.77507	7.88867	3.12479	0.0771099	0.397285
ENSG00000160014	calmodulin 3 (phosphorylase kinase, delta) [Source:HGNC Symbol;Acc:1449]	CALM3	protein_coding	2.77742	5.9751	2.01319	3.73704	6.37116	4.314	6.29037	4.04197	3.11961	0.0773554	0.398217
ENSG00000248835	CDNA: FLJ21031 fis, clone CAE07336; HCG1780521; Uncharacterized protein [Source:UniProtKB/TrEMBL;Acc:Q9H7D2]	AL357673.1	protein_coding	-1.08842	3.92818	3.9818	4.98466	3.06491	4.68405	3.1072	4.8446	3.11847	0.0774097	0.398217
ENSG00000131149	Gse1 coiled-coil protein [Source:HGNC Symbol;Acc:28979]	GSE1	protein_coding	-1.80845	5.12505	4.17032	4.77549	4.04597	7.27906	4.04874	6.48285	3.1157	0.0775412	0.398588
ENSG00000178913	TAF7 RNA polymerase II, TATA box binding protein (TBP)-associated factor, 55kDa [Source:HGNC Symbol;Acc:11541]	TAF7	protein_coding	3.2315	6.92498	5.32553	7.73175	6.81392	4.58046	6.75808	6.91213	3.11159	0.077737	0.399288
ENSG00000132824	serine incorporator 3 [Source:HGNC Symbol;Acc:11699]	SERINC3	protein_coding	2.21339	7.18638	1.41864	7.56637	7.30656	5.65918	7.21727	6.92058	3.10919	0.0778517	0.399571
ENSG00000230105		RP11-431N15.2	lincRNA	3.22817	2.66803	1.41864	1.6273	2.94582	1.25916	2.90553	1.46172	3.10185	0.0782035	0.40096
ENSG00000106546	aryl hydrocarbon receptor [Source:HGNC Symbol;Acc:348]	AHR	protein_coding	-1.82736	4.68957	7.10458	6.37592	2.20904	5.54139	3.25344	6.01598	3.10097	0.0782457	0.40096
ENSG00000155906	required for meiotic nuclear division 1 homolog (S. cerevisiae) [Source:HGNC Symbol;Acc:21176]	RMND1	protein_coding	-2.66949	4.69778	4.44367	5.53764	2.91196	6.278	3.00371	5.94708	3.09981	0.0783017	0.40096
ENSG00000128487	sperm antigen with calponin homology and coiled-coil domains 1 [Source:HGNC Symbol;Acc:30615]	SPECC1	protein_coding	1.33309	5.17244	6.64707	4.94155	5.1011	4.70022	5.22999	4.8273	3.09414	0.0785746	0.401994
ENSG00000033627	ATPase, H+ transporting, lysosomal V0 subunit a1 [Source:HGNC Symbol;Acc:865]	ATP6V0A1	protein_coding	-1.71574	3.65508	1.41864	3.93189	2.59472	4.85026	2.56246	4.47372	3.09313	0.0786237	0.401994
ENSG00000113615	SEC24 family member A [Source:HGNC Symbol;Acc:10703]	SEC24A	protein_coding	-3.06039	5.43317	1.41864	5.24812	3.98199	7.37279	3.92918	6.59796	3.09133	0.0787105	0.402132
ENSG00000182224	cytochrome b5 domain containing 1 [Source:HGNC Symbol;Acc:26516]	CYB5D1	protein_coding	4.96995	7.02465	10.7394	4.14709	6.98364	3.60662	7.84287	3.91311	3.08919	0.0788142	0.402355
ENSG00000165195	phosphatidylinositol glycan anchor biosynthesis, class A [Source:HGNC Symbol;Acc:8957]	PIGA	protein_coding	3.91113	2.73413	1.41864	0.353986	3.12546	1.17027	3.0876	0.782308	3.085	0.0790171	0.402809
ENSG00000153914	splicing regulatory glutamine/lysine-rich protein 1 [Source:HGNC Symbol;Acc:17882]	SREK1	protein_coding	-1.78897	7.46764	3.006	7.60185	6.74437	8.9177	6.66107	8.38828	3.08487	0.0790234	0.402809
ENSG00000166710	beta-2-microglobulin [Source:HGNC Symbol;Acc:914]	B2M	protein_coding	-0.986546	12.2536	11.1217	12.0178	11.707	13.5036	11.6747	12.944	3.08029	0.0792464	0.403072
ENSG00000127914	A kinase (PRKA) anchor protein 9 [Source:HGNC Symbol;Acc:379]	AKAP9	protein_coding	-1.35213	8.08703	5.55081	8.47043	7.40573	9.01971	7.33966	8.77368	3.08009	0.0792564	0.403072
ENSG00000114346	epithelial cell transforming sequence 2 oncogene [Source:HGNC Symbol;Acc:3155]	ECT2	protein_coding	-1.2578	6.04249	6.53966	7.26397	4.96075	7.04791	5.09756	7.16476	3.07632	0.0794401	0.403072
ENSG00000135404	CD63 molecule [Source:HGNC Symbol;Acc:1692]	CD63	protein_coding	1.1013	9.86282	10.321	9.21457	9.92001	9.56272	9.94993	9.3986	3.07619	0.0794463	0.403072
ENSG00000169891	RALBP1 associated Eps domain containing 2 [Source:HGNC Symbol;Acc:9963]	REPS2	protein_coding	3.27003	5.72168	2.74345	4.85906	6.14408	3.37858	6.06798	4.31851	3.07558	0.0794764	0.403072
ENSG00000215301	DEAD (Asp-Glu-Ala-Asp) box helicase 3, X-linked [Source:HGNC Symbol;Acc:2745]	DDX3X	protein_coding	1.46378	8.39985	11.0443	8.05693	8.19022	8.10666	8.67493	8.08131	3.07364	0.0795709	0.403072
ENSG00000114698	phospholipid scramblase 4 [Source:HGNC Symbol;Acc:16497]	PLSCR4	protein_coding	3.35591	4.84423	1.41864	0.460333	5.30953	2.86674	5.23902	2.02268	3.07345	0.0795803	0.403072
ENSG00000233404		FLJ20373	protein_coding	-3.36148	4.98673	1.41864	5.37398	3.14021	7.41802	3.10183	6.7244	3.07302	0.0796013	0.403072
ENSG00000058668	ATPase, Ca++ transporting, plasma membrane 4 [Source:HGNC Symbol;Acc:817]	ATP2B4	protein_coding	2.02662	8.23483	9.2098	8.05643	8.20403	7.15939	8.2934	7.67984	3.07162	0.0796701	0.403072
ENSG00000153774	craniofacial development protein 1 [Source:HGNC Symbol;Acc:1873]	CFDP1	protein_coding	2.36255	5.72017	5.27811	5.74881	6.06241	4.26331	6.02715	5.21189	3.07149	0.0796763	0.403072
ENSG00000150687	protease, serine, 23 [Source:HGNC Symbol;Acc:14370]	PRSS23	protein_coding	1.95688	5.40374	3.44544	3.93514	5.76642	4.43538	5.70221	4.20357	3.06783	0.0798559	0.403573
ENSG00000075624	actin, beta [Source:HGNC Symbol;Acc:132]	ACTB	protein_coding	1.18468	12.504	12.5113	11.9759	12.57	12.0305	12.5661	12.0035	3.06702	0.0798957	0.403573
ENSG00000109756	Rap guanine nucleotide exchange factor (GEF) 2 [Source:HGNC Symbol;Acc:16854]	RAPGEF2	protein_coding	-1.91989	7.07937	3.0036	5.7107	6.27409	8.60846	6.19924	7.78955	3.0616	0.0801629	0.404618
ENSG00000250021	C15orf38-AP3S2 readthrough [Source:HGNC Symbol;Acc:38824]	C15orf38-AP3S2	protein_coding	3.86635	5.68025	1.41864	6.68652	5.65522	2.69057	5.58137	5.80657	3.05773	0.080354	0.405064
ENSG00000108465	CDK5 regulatory subunit associated protein 3 [Source:HGNC Symbol;Acc:18673]	CDK5RAP3	protein_coding	-2.14178	6.30542	4.0036	6.68419	5.32046	7.43265	5.27393	7.11619	3.05736	0.0803722	0.405064
ENSG00000074842	chromosome 19 open reading frame 10 [Source:HGNC Symbol;Acc:16948]	C19orf10	protein_coding	3.58437	4.63681	1.41864	3.18389	4.94517	2.42533	4.87913	2.87585	3.05612	0.0804335	0.405068
ENSG00000099917	mediator complex subunit 15 [Source:HGNC Symbol;Acc:14248]	MED15	protein_coding	-2.9992	3.17303	1.41864	4.56105	1.46019	4.45741	1.45489	4.51117	3.05326	0.0805751	0.405477
ENSG00000112078	potassium channel tetramerization domain containing 20 [Source:HGNC Symbol;Acc:21052]	KCTD20	protein_coding	2.07376	5.37582	7.87002	6.00545	4.87974	3.79564	5.31703	5.36672	3.0486	0.0808067	0.406229
ENSG00000163002	nucleoporin 35kDa [Source:HGNC Symbol;Acc:29797]	NUP35	protein_coding	3.22152	5.01748	1.41864	6.15591	4.88633	2.27477	4.82276	5.31831	3.04782	0.0808457	0.406229
ENSG00000100083	golgi-associated, gamma adaptin ear containing, ARF binding protein 1 [Source:HGNC Symbol;Acc:17842]	GGA1	protein_coding	1.37355	4.29521	4.93655	5.03877	4.055	3.49883	4.10418	4.46401	3.04369	0.0810517	0.406786
ENSG00000138780	glutathione S-transferase, C-terminal domain containing [Source:HGNC Symbol;Acc:25806]	GSTCD	protein_coding	-2.77577	4.45351	1.41864	2.55957	3.15379	6.38494	3.11632	5.29777	3.04316	0.081078	0.406786
ENSG00000213888	CDNA FLJ20464 fis, clone KAT06158; HCG1777549; Uncharacterized protein [Source:UniProtKB/TrEMBL;Acc:Q9NX35]	AC005003.1	protein_coding	-1.28536	3.62658	4.31782	4.53362	2.5608	4.71637	2.67202	4.6275	3.04028	0.0812221	0.407204
ENSG00000156603	mediator complex subunit 19 [Source:HGNC Symbol;Acc:29600]	MED19	protein_coding	-3.85457	3.90346	1.41864	4.87747	1.35946	4.76956	1.35707	4.8283	3.03693	0.0813896	0.407569
ENSG00000108468	chromobox homolog 1 [Source:HGNC Symbol;Acc:1551]	CBX1	protein_coding	3.13153	3.20827	1.41864	4.2546	3.1842	1.47469	3.14487	3.51766	3.0364	0.0814165	0.407569
ENSG00000000003	tetraspanin 6 [Source:HGNC Symbol;Acc:11858]	TSPAN6	protein_coding	-2.65827	5.90361	2.47175	6.83975	4.03822	7.34623	3.99439	7.11725	3.03349	0.0815625	0.407995
ENSG00000041353	RAB27B, member RAS oncogene family [Source:HGNC Symbol;Acc:9767]	RAB27B	protein_coding	3.40401	6.64502	10.5961	2.64285	6.28221	5.21786	7.38874	4.43934	3.02885	0.0817962	0.408859
ENSG00000152620	NAD kinase 2, mitochondrial [Source:HGNC Symbol;Acc:26404]	NADK2	protein_coding	1.76452	4.20975	2.50949	1.8442	4.59572	3.67158	4.54305	2.99696	3.01933	0.0822772	0.410957
ENSG00000173698	G protein-coupled receptor 64 [Source:HGNC Symbol;Acc:4516]	GPR64	protein_coding	-1.33658	4.72737	5.98424	3.7943	3.43001	6.91105	3.68432	6.05044	3.0136	0.0825685	0.411828
ENSG00000165219	GTPase activating protein and VPS9 domains 1 [Source:HGNC Symbol;Acc:23375]	GAPVD1	protein_coding	-1.83269	5.39688	2.0084	3.10675	4.49624	7.1185	4.43865	6.21759	3.01349	0.0825744	0.411828
ENSG00000167526	ribosomal protein L13 [Source:HGNC Symbol;Acc:10303]	RPL13	protein_coding	1.32387	9.30258	9.66517	7.73445	9.4068	8.76161	9.42498	8.3382	3.01004	0.0827501	0.412397
ENSG00000205682		RP11-798L4.1	lincRNA	-1.46745	2.96674	4.78321	3.59513	1.36803	3.62271	1.73039	3.60777	3.00873	0.0828171	0.412424
ENSG00000083307	grainyhead-like 2 (Drosophila) [Source:HGNC Symbol;Acc:2799]	GRHL2	protein_coding	-1.80363	4.56855	1.41864	4.74435	3.81059	5.72402	3.76006	5.3191	3.0075	0.0828801	0.412432
ENSG00000162976	PQ loop repeat containing 3 [Source:HGNC Symbol;Acc:28503]	PQLC3	protein_coding	4.81996	4.61496	1.41864	4.09341	5.1328	1.45278	5.06526	3.40016	3.00389	0.0830651	0.413045
ENSG00000180921	family with sequence similarity 83, member H [Source:HGNC Symbol;Acc:24797]	FAM83H	protein_coding	4.88199	3.76972	1.41864	2.53713	4.0195	1.1605	3.96545	2.00288	2.99795	0.0833697	0.413993
ENSG00000196576	plexin B2 [Source:HGNC Symbol;Acc:9104]	PLXNB2	protein_coding	-2.13421	5.41484	1.41864	6.31203	4.26608	6.46559	4.20967	6.39162	2.99777	0.0833791	0.413993
ENSG00000130724	charged multivesicular body protein 2A [Source:HGNC Symbol;Acc:30216]	CHMP2A	protein_coding	1.41921	7.72281	8.48473	8.25968	7.61385	6.80855	7.68592	7.70385	2.99453	0.0835463	0.414516
ENSG00000155657	titin [Source:HGNC Symbol;Acc:12403]	TTN	protein_coding	3.89424	9.99608	1.41864	7.15856	10.4546	7.43411	10.3565	7.30089	2.99316	0.083617	0.41456
ENSG00000171224	chromosome 10 open reading frame 35 [Source:HGNC Symbol;Acc:23519]	C10orf35	protein_coding	-3.49742	4.00598	1.41864	3.09158	2.05696	6.11578	2.03664	5.27956	2.985	0.0840391	0.416216
ENSG00000057294	plakophilin 2 [Source:HGNC Symbol;Acc:9024]	PKP2	protein_coding	-1.54572	3.01643	1.54297	4.5467	1.94504	3.66562	1.93039	4.20492	2.98431	0.0840753	0.416216
ENSG00000117697	NSL1, MIS12 kinetochore complex component [Source:HGNC Symbol;Acc:24548]	NSL1	protein_coding	5.65637	3.51621	1.41864	2.9607	3.87084	0.876536	3.82213	2.385	2.97691	0.0844605	0.417738
ENSG00000106211	heat shock 27kDa protein 1 [Source:HGNC Symbol;Acc:5246]	HSPB1	protein_coding	1.68363	6.65115	2.0036	4.05252	6.96392	5.89872	6.87771	5.22189	2.97601	0.0845073	0.417738
ENSG00000177106	EPS8-like 2 [Source:HGNC Symbol;Acc:21296]	EPS8L2	protein_coding	-2.65275	3.7248	1.41864	4.31843	2.09317	4.93145	2.07128	4.67434	2.97395	0.084615	0.417778
ENSG00000241343	ribosomal protein L36a [Source:HGNC Symbol;Acc:10359]	RPL36A	protein_coding	1.34184	7.83611	6.16442	6.77133	8.02577	7.11761	7.95817	6.95325	2.97289	0.0846703	0.417778
ENSG00000198646	nuclear receptor coactivator 6 [Source:HGNC Symbol;Acc:15936]	NCOA6	protein_coding	3.49927	5.81398	1.41864	8.46069	4.72514	2.293	4.66326	7.46215	2.97228	0.0847025	0.417778
ENSG00000108671	proteasome (prosome, macropain) 26S subunit, non-ATPase, 11 [Source:HGNC Symbol;Acc:9556]	PSMD11	protein_coding	1.85456	8.24875	11.8332	8.74391	7.46455	6.80791	8.64077	8.0726	2.96596	0.0850339	0.419082
ENSG00000082269	family with sequence similarity 135, member A [Source:HGNC Symbol;Acc:21084]	FAM135A	protein_coding	-1.59753	4.55323	3.9522	5.85825	3.35614	5.74172	3.38157	5.79767	2.96286	0.0851974	0.419082
ENSG00000146676	purine-rich element binding protein B [Source:HGNC Symbol;Acc:9702]	PURB	protein_coding	1.98353	5.28832	2.02745	5.11585	5.51546	4.08129	5.44283	4.7186	2.96165	0.0852608	0.419082
ENSG00000136930	proteasome (prosome, macropain) subunit, beta type, 7 [Source:HGNC Symbol;Acc:9544]	PSMB7	protein_coding	3.04105	7.17766	1.41864	7.31732	7.30687	4.9642	7.21806	6.60488	2.96121	0.0852839	0.419082
ENSG00000167986	damage-specific DNA binding protein 1, 127kDa [Source:HGNC Symbol;Acc:2717]	DDB1	protein_coding	-1.51778	6.29336	4.11352	5.16254	5.59517	7.89475	5.54376	7.10829	2.96054	0.0853195	0.419082
ENSG00000048991	R3H domain containing 1 [Source:HGNC Symbol;Acc:9757]	R3HDM1	protein_coding	1.97978	5.09944	2.27861	5.79023	4.90527	3.62237	4.8434	5.09069	2.96011	0.085342	0.419082
ENSG00000130703	oxysterol binding protein-like 2 [Source:HGNC Symbol;Acc:15761]	OSBPL2	protein_coding	-1.3135	6.13212	6.62165	7.37881	5.0101	7.07245	5.156	7.23263	2.95863	0.0854206	0.419106
ENSG00000149639	suppressor of glucose, autophagy associated 1 [Source:HGNC Symbol;Acc:16111]	SOGA1	protein_coding	1.34916	5.02176	9.58987	4.1192	3.00425	3.69552	5.6175	3.92121	2.95759	0.0854755	0.419106
ENSG00000111364	DEAD (Asp-Glu-Ala-Asp) box polypeptide 55 [Source:HGNC Symbol;Acc:20085]	DDX55	protein_coding	2.01466	5.7719	5.09953	4.83743	6.31864	4.76644	6.26426	4.8011	2.95537	0.085593	0.419106
ENSG00000136942	ribosomal protein L35 [Source:HGNC Symbol;Acc:10344]	RPL35	protein_coding	1.30164	8.37819	4.74057	7.77551	8.55999	7.76742	8.47148	7.77139	2.95529	0.085597	0.419106
ENSG00000185753	chromosome X open reading frame 38 [Source:HGNC Symbol;Acc:28589]	CXorf38	protein_coding	-1.31371	5.51433	6.55737	6.56895	3.8478	5.7969	4.16547	6.24195	2.95258	0.0857406	0.419374
ENSG00000243081		RP11-231E6.1	lincRNA	-1.58933	3.0436	1.41864	3.75193	2.14035	4.10642	2.11818	3.93347	2.9519	0.0857768	0.419374
ENSG00000172869	Dmx-like 1 [Source:HGNC Symbol;Acc:2937]	DMXL1	protein_coding	3.59563	4.66339	1.41864	5.20094	4.7858	2.272	4.72347	4.36899	2.94723	0.086025	0.419932
ENSG00000177200	chromodomain helicase DNA binding protein 9 [Source:HGNC Symbol;Acc:25701]	CHD9	protein_coding	-1.88892	7.35649	4.9422	7.03665	6.32191	9.10872	6.26891	8.40815	2.94624	0.0860778	0.419932
ENSG00000128050	phosphoribosylaminoimidazole carboxylase, phosphoribosylaminoimidazole succinocarboxamide synthetase [Source:HGNC Symbol;Acc:8587]	PAICS	protein_coding	-1.42045	6.71495	5.21825	6.42708	5.94733	8.1227	5.91447	7.51931	2.94505	0.0861409	0.419932
ENSG00000134287	ADP-ribosylation factor 3 [Source:HGNC Symbol;Acc:654]	ARF3	protein_coding	4.11183	4.43928	1.41864	5.53289	4.27281	1.48677	4.21723	4.70344	2.94386	0.0862046	0.419932
ENSG00000097033	SH3-domain GRB2-like endophilin B1 [Source:HGNC Symbol;Acc:10833]	SH3GLB1	protein_coding	2.35103	6.94808	1.41864	7.35962	7.14643	5.30053	7.05831	6.66595	2.94239	0.0862829	0.419932
ENSG00000185624	prolyl 4-hydroxylase, beta polypeptide [Source:HGNC Symbol;Acc:8548]	P4HB	protein_coding	1.85654	8.20679	3.54131	6.22748	8.46784	6.83343	8.37591	6.55388	2.94004	0.0864084	0.419932
ENSG00000168827	G elongation factor, mitochondrial 1 [Source:HGNC Symbol;Acc:13780]	GFM1	protein_coding	2.3109	5.50554	3.62341	5.54037	5.78882	3.81399	5.71852	4.9825	2.93949	0.0864378	0.419932
ENSG00000100425	bromodomain containing 1 [Source:HGNC Symbol;Acc:1102]	BRD1	protein_coding	-3.25867	5.4829	2.0036	4.1786	3.65127	7.50795	3.61036	6.56097	2.93912	0.0864579	0.419932
ENSG00000164574	UDP-N-acetyl-alpha-D-galactosamine:polypeptide N-acetylgalactosaminyltransferase 10 (GalNAc-T10) [Source:HGNC Symbol;Acc:19873]	GALNT10	protein_coding	2.3689	5.51544	3.15416	6.07013	5.58393	3.8509	5.5213	5.34091	2.93834	0.0864994	0.419932
ENSG00000079246	X-ray repair complementing defective repair in Chinese hamster cells 5 (double-strand-break rejoining) [Source:HGNC Symbol;Acc:12833]	XRCC5	protein_coding	-1.59474	8.78013	1.41864	9.50213	7.94091	9.91509	7.84844	9.7232	2.93801	0.0865175	0.419932
ENSG00000101350	kinesin family member 3B [Source:HGNC Symbol;Acc:6320]	KIF3B	protein_coding	3.00997	7.14964	1.41864	6.10267	7.75832	5.15021	7.66211	5.70366	2.93616	0.0866162	0.420108
ENSG00000170653	activating transcription factor 7 [Source:HGNC Symbol;Acc:792]	ATF7	protein_coding	-2.42443	6.0939	1.41864	5.29569	5.19279	7.35345	5.12353	6.66223	2.93171	0.0868557	0.420338
ENSG00000077380	dynein, cytoplasmic 1, intermediate chain 2 [Source:HGNC Symbol;Acc:2964]	DYNC1I2	protein_coding	2.23409	6.91659	2.41864	6.97585	6.98336	5.50933	6.89765	6.43764	2.9313	0.0868776	0.420338
ENSG00000116641	dedicator of cytokinesis 7 [Source:HGNC Symbol;Acc:19190]	DOCK7	protein_coding	-1.60267	4.20431	4.86291	3.6891	2.91179	5.9515	3.04672	5.27889	2.93116	0.0868849	0.420338
ENSG00000092978	G patch domain containing 2 [Source:HGNC Symbol;Acc:25499]	GPATCH2	protein_coding	-2.72981	6.02529	1.41864	8.16794	1.14352	4.00699	1.14787	7.26096	2.93061	0.0869147	0.420338
ENSG00000077238	interleukin 4 receptor [Source:HGNC Symbol;Acc:6015]	IL4R	protein_coding	-2.00356	5.40322	5.46478	6.92732	3.555	6.22216	3.7005	6.60746	2.92607	0.0871592	0.421217
ENSG00000144730	interleukin 17 receptor D [Source:HGNC Symbol;Acc:17616]	IL17RD	protein_coding	-1.17127	4.63693	5.3086	5.93736	3.21769	5.18233	3.38856	5.61942	2.92437	0.0872513	0.421358
ENSG00000139278	GLI pathogenesis-related 1 [Source:HGNC Symbol;Acc:17001]	GLIPR1	protein_coding	4.23205	5.61703	1.41864	5.42679	6.0034	2.65367	5.92387	4.71834	2.92072	0.0874488	0.421748
ENSG00000183891	tetratricopeptide repeat domain 32 [Source:HGNC Symbol;Acc:32954]	TTC32	protein_coding	-4.26138	3.91829	1.41864	6.48802	0.686096	4.77522	0.707571	5.8453	2.92055	0.0874578	0.421748
ENSG00000169435	Ras association (RalGDS/AF-6) domain family member 6 [Source:HGNC Symbol;Acc:20796]	RASSF6	protein_coding	2.07164	5.85091	5.78846	3.95989	6.27369	4.96127	6.2493	4.52	2.91521	0.0877482	0.422653
ENSG00000214967	nuclear pore complex interacting protein family, member A7 [Source:HGNC Symbol;Acc:41982]	NPIPA7	protein_coding	-1.98658	5.25553	1.41864	4.23244	4.4722	6.89648	4.41287	6.0961	2.91423	0.087801	0.422653
ENSG00000197756	ribosomal protein L37a [Source:HGNC Symbol;Acc:10348]	RPL37A	protein_coding	1.20021	8.51682	8.72397	7.17606	8.62455	8.25418	8.63088	7.80743	2.91362	0.0878346	0.422653
ENSG00000147044	calcium/calmodulin-dependent serine protein kinase (MAGUK family) [Source:HGNC Symbol;Acc:1497]	CASK	protein_coding	-2.82417	5.59823	4.32553	5.32984	3.62349	7.4357	3.65511	6.72212	2.9116	0.0879445	0.422878
ENSG00000131238	palmitoyl-protein thioesterase 1 [Source:HGNC Symbol;Acc:9325]	PPT1	protein_coding	-2.20599	7.01295	5.22599	7.74858	5.35976	8.84453	5.35163	8.39522	2.903	0.0884151	0.424836
ENSG00000181704	Yip1 domain family, member 6 [Source:HGNC Symbol;Acc:28304]	YIPF6	protein_coding	1.23141	7.15858	11.1353	6.71231	5.91147	6.64025	7.60943	6.67707	2.89985	0.0885876	0.425055
ENSG00000138814	protein phosphatase 3, catalytic subunit, alpha isozyme [Source:HGNC Symbol;Acc:9314]	PPP3CA	protein_coding	2.06387	6.99117	6.11908	6.30804	7.20347	5.59385	7.15577	6.00026	2.8998	0.0885904	0.425055
ENSG00000163939	polybromo 1 [Source:HGNC Symbol;Acc:30064]	PBRM1	protein_coding	1.72149	6.8854	6.73804	6.47984	7.29582	6.00818	7.26609	6.26501	2.89802	0.0886882	0.425055
ENSG00000205670	small integral membrane protein 11 [Source:HGNC Symbol;Acc:1293]	SMIM11	protein_coding	-2.27994	3.6162	1.41864	3.98561	2.77608	5.19742	2.74297	4.70109	2.89755	0.0887143	0.425055
ENSG00000013588	G protein-coupled receptor, family C, group 5, member A [Source:HGNC Symbol;Acc:9836]	GPRC5A	protein_coding	3.3927	9.15792	2.77196	6.60916	9.84751	6.82242	9.75043	6.71824	2.89379	0.0889213	0.425319
ENSG00000164171	integrin, alpha 2 (CD49B, alpha 2 subunit of VLA-2 receptor) [Source:HGNC Symbol;Acc:6137]	ITGA2	protein_coding	2.51143	9.9721	1.41864	8.94111	10.268	8.17583	10.1701	8.60848	2.89338	0.088944	0.425319
ENSG00000175309	5-phosphohydroxy-L-lysine phospho-lyase [Source:HGNC Symbol;Acc:28249]	PHYKPL	protein_coding	3.70362	4.4352	1.41864	4.94294	4.15804	1.26849	4.10261	4.00316	2.89123	0.0890628	0.425319
ENSG00000136205	tensin 3 [Source:HGNC Symbol;Acc:21616]	TNS3	protein_coding	1.63766	5.98337	6.05874	6.06211	6.06829	5.0714	6.06661	5.65036	2.89085	0.0890842	0.425319
ENSG00000196199	M-phase phosphoprotein 8 [Source:HGNC Symbol;Acc:29810]	MPHOSPH8	protein_coding	1.49505	6.13067	10.6076	5.37728	4.53357	4.86385	6.83855	5.15511	2.89004	0.0891286	0.425319
ENSG00000081087	osteopetrosis associated transmembrane protein 1 [Source:HGNC Symbol;Acc:21652]	OSTM1	protein_coding	2.23246	4.33703	6.6238	5.05082	4.0177	2.57067	4.30007	4.34807	2.88894	0.0891897	0.425319
ENSG00000159921	glucosamine (UDP-N-acetyl)-2-epimerase/N-acetylmannosamine kinase [Source:HGNC Symbol;Acc:23657]	GNE	protein_coding	-1.17139	6.47073	6.31782	7.1271	5.5049	7.58649	5.55953	7.37405	2.88661	0.0893188	0.425319
ENSG00000100311	platelet-derived growth factor beta polypeptide [Source:HGNC Symbol;Acc:8800]	PDGFB	protein_coding	5.41312	4.65631	1.41864	0.353986	4.93369	1.48908	4.86852	0.991784	2.88542	0.0893849	0.425319
ENSG00000222041	long intergenic non-protein coding RNA 152 [Source:HGNC Symbol;Acc:28717]	LINC00152	lincRNA	-2.57004	5.43786	3.0036	6.236	3.87612	6.9166	3.84626	6.61404	2.88438	0.0894422	0.425319
ENSG00000217128	folliculin interacting protein 1 [Source:HGNC Symbol;Acc:29418]	FNIP1	protein_coding	1.83234	7.50401	11.327	6.67707	6.85633	6.93822	8.08114	6.80913	2.88274	0.0895334	0.425319
ENSG00000186625	katanin p60 (ATPase containing) subunit A 1 [Source:HGNC Symbol;Acc:6216]	KATNA1	protein_coding	4.98091	4.42605	1.41864	3.68236	4.79236	1.39822	4.72788	2.99524	2.88113	0.0896231	0.425319
ENSG00000213240	notch 2 N-terminal like [Source:HGNC Symbol;Acc:31862]	NOTCH2NL	protein_coding	-3.01499	4.67515	1.41864	5.64709	2.77975	6.21767	2.74526	5.95594	2.88063	0.089651	0.425319
ENSG00000198189	hydroxysteroid (17-beta) dehydrogenase 11 [Source:HGNC Symbol;Acc:22960]	HSD17B11	protein_coding	2.27866	7.13157	10.6892	4.72665	6.73296	6.71252	7.65853	6.0156	2.8802	0.0896751	0.425319
ENSG00000059378	poly (ADP-ribose) polymerase family, member 12 [Source:HGNC Symbol;Acc:21919]	PARP12	protein_coding	5.59132	4.79948	1.41864	5.84312	5.06002	1.15789	4.99256	4.94019	2.87922	0.0897293	0.425319
ENSG00000198399	intersectin 2 [Source:HGNC Symbol;Acc:6184]	ITSN2	protein_coding	3.00701	6.23283	2.41864	6.64956	6.43869	3.73399	6.35932	5.81077	2.87821	0.0897856	0.425319
ENSG00000182568	SATB homeobox 1 [Source:HGNC Symbol;Acc:10541]	SATB1	protein_coding	3.66455	6.8086	1.41864	8.5821	6.59922	3.32337	6.51553	7.61815	2.87754	0.0898231	0.425319
ENSG00000143257	nuclear receptor subfamily 1, group I, member 3 [Source:HGNC Symbol;Acc:7969]	NR1I3	protein_coding	-1.21622	4.05215	4.60451	5.57087	2.78662	4.66856	2.90902	5.19033	2.87709	0.0898482	0.425319
ENSG00000140988	ribosomal protein S2 [Source:HGNC Symbol;Acc:10404]	RPS2	protein_coding	1.53558	8.87699	5.9422	7.10573	9.15058	7.95031	9.06455	7.58324	2.87523	0.0899518	0.42551
ENSG00000151276	membrane associated guanylate kinase, WW and PDZ domain containing 1 [Source:HGNC Symbol;Acc:946]	MAGI1	protein_coding	-2.3384	3.84964	1.41864	5.6913	2.59378	4.69072	2.56289	5.28074	2.87342	0.0900535	0.425522
ENSG00000155850	solute carrier family 26 (anion exchanger), member 2 [Source:HGNC Symbol;Acc:10994]	SLC26A2	protein_coding	3.26962	3.94922	1.41864	2.15997	4.41674	2.12756	4.35513	2.1428	2.87208	0.0901283	0.425522
ENSG00000148337	CDKN1A interacting zinc finger protein 1 [Source:HGNC Symbol;Acc:16744]	CIZ1	protein_coding	4.99268	4.27067	1.41864	3.89981	4.33601	1.14822	4.2786	3.15517	2.87179	0.0901448	0.425522
ENSG00000187514	prothymosin, alpha [Source:HGNC Symbol;Acc:9623]	PTMA	protein_coding	1.13403	10.0744	10.3557	9.81948	10.0312	9.60224	10.0548	9.7151	2.8703	0.090228	0.425615
ENSG00000185432	methyltransferase like 7A [Source:HGNC Symbol;Acc:24550]	METTL7A	protein_coding	-1.76779	2.34688	2.94721	3.96494	0.664652	2.56288	0.805622	3.44896	2.86792	0.0903619	0.42583
ENSG00000171858	ribosomal protein S21 [Source:HGNC Symbol;Acc:10409]	RPS21	protein_coding	1.44384	6.645	7.36115	5.65378	6.75825	6.17544	6.80075	5.93416	2.86722	0.0904008	0.42583
ENSG00000144560	vestigial like 4 (Drosophila) [Source:HGNC Symbol;Acc:28966]	VGLL4	protein_coding	-1.34982	4.84774	4.75635	6.80482	3.02036	5.23678	3.13551	6.24027	2.86446	0.0905561	0.425986
ENSG00000159063	ALG8, alpha-1,3-glucosyltransferase [Source:HGNC Symbol;Acc:23161]	ALG8	protein_coding	-3.15834	5.50224	2.41864	6.28288	3.76462	7.34267	3.72619	6.92343	2.86394	0.0905855	0.425986
ENSG00000152465	N-myristoyltransferase 2 [Source:HGNC Symbol;Acc:7858]	NMT2	protein_coding	-1.03493	5.81125	6.0048	6.99919	4.91266	6.78959	4.99072	6.89847	2.86324	0.0906245	0.425986
ENSG00000139146	family with sequence similarity 60, member A [Source:HGNC Symbol;Acc:30702]	FAM60A	protein_coding	-2.15939	7.38036	2.68468	8.85192	5.74676	8.25354	5.67574	8.583	2.862	0.0906949	0.426018
ENSG00000185332	transmembrane protein 105 [Source:HGNC Symbol;Acc:26794]	TMEM105	protein_coding	-1.02871	3.09003	4.96523	3.84519	1.76177	3.80294	2.08504	3.82301	2.85824	0.0909067	0.426714
ENSG00000100836	poly(A) binding protein, nuclear 1 [Source:HGNC Symbol;Acc:8565]	PABPN1	protein_coding	-1.63759	4.90258	4.0036	5.59535	3.88368	6.19851	3.88599	5.90514	2.85564	0.091054	0.427107
ENSG00000119977	tectonic family member 3 [Source:HGNC Symbol;Acc:24519]	TCTN3	protein_coding	5.03998	5.50701	1.41864	6.79125	5.3983	1.7874	5.32728	5.79277	2.85272	0.0912195	0.427228
ENSG00000180228	protein kinase, interferon-inducible double stranded RNA dependent activator [Source:HGNC Symbol;Acc:9438]	PRKRA	protein_coding	2.95384	5.22998	8.13974	6.07863	4.69929	2.61552	5.28148	5.26794	2.85215	0.0912518	0.427228
ENSG00000127328	RAB3A interacting protein [Source:HGNC Symbol;Acc:16508]	RAB3IP	protein_coding	-2.03402	6.59198	4.24137	8.34266	4.95825	7.67029	4.92825	8.0497	2.85181	0.0912711	0.427228
ENSG00000140992	3-phosphoinositide dependent protein kinase-1 [Source:HGNC Symbol;Acc:8816]	PDPK1	protein_coding	-2.64955	6.58622	1.41864	5.18113	5.60395	8.08872	5.52952	7.29163	2.84855	0.0914564	0.427235
ENSG00000169100	solute carrier family 25 (mitochondrial carrier; adenine nucleotide translocator), member 6 [Source:HGNC Symbol;Acc:10992]	SLC25A6	protein_coding	2.07848	8.49894	1.41864	6.90014	8.79384	7.37746	8.69853	7.15876	2.84813	0.0914804	0.427235
ENSG00000008517	interleukin 32 [Source:HGNC Symbol;Acc:16830]	IL32	protein_coding	1.99206	9.65433	1.41864	9.70477	9.67361	8.04574	9.57625	9.10398	2.84792	0.0914924	0.427235
ENSG00000167693	nucleoredoxin [Source:HGNC Symbol;Acc:18008]	NXN	protein_coding	1.66566	6.24594	2.99153	6.35063	6.27604	5.10167	6.20018	5.85844	2.8473	0.0915276	0.427235
ENSG00000198198	seizure threshold 2 homolog (mouse) [Source:HGNC Symbol;Acc:29040]	SZT2	protein_coding	2.06296	4.67495	4.26061	5.19448	4.7533	3.41782	4.72841	4.58402	2.8448	0.0916699	0.427602
ENSG00000096401	cell division cycle 5-like [Source:HGNC Symbol;Acc:1743]	CDC5L	protein_coding	2.24987	6.38005	1.41864	8.21674	5.88241	4.42722	5.80523	7.32506	2.8385	0.0920301	0.428983
ENSG00000157538	Down syndrome critical region gene 3 [Source:HGNC Symbol;Acc:3044]	DSCR3	protein_coding	-2.23314	6.23825	2.09671	6.03576	5.36822	7.91998	5.29503	7.23746	2.834	0.0922882	0.429887
ENSG00000141198	target of myb1 (chicken)-like 1 [Source:HGNC Symbol;Acc:11983]	TOM1L1	protein_coding	4.63122	6.84366	1.41864	7.83694	7.04022	3.11315	6.95219	6.92152	2.8326	0.0923688	0.429964
ENSG00000006459	lysine (K)-specific demethylase 7A [Source:HGNC Symbol;Acc:22224]	KDM7A	protein_coding	3.83885	4.56107	1.41864	2.45644	4.94141	2.20264	4.87594	2.33485	2.82863	0.0925972	0.430728
ENSG00000154582	transcription elongation factor B (SIII), polypeptide 1 (15kDa, elongin C) [Source:HGNC Symbol;Acc:11617]	TCEB1	protein_coding	-1.6663	5.804	2.26664	5.81902	5.14303	7.01172	5.07699	6.5259	2.82733	0.0926721	0.430761
ENSG00000111678	chromosome 12 open reading frame 57 [Source:HGNC Symbol;Acc:29521]	C12orf57	protein_coding	1.78421	6.2769	8.3375	5.11273	6.21391	5.26564	6.46671	5.18971	2.82611	0.0927425	0.430761
ENSG00000136840	ST6 (alpha-N-acetyl-neuraminyl-2,3-beta-galactosyl-1,3)-N-acetylgalactosaminide alpha-2,6-sialyltransferase 4 [Source:HGNC Symbol;Acc:17846]	ST6GALNAC4	protein_coding	5.91718	4.42351	1.41864	3.52209	5.12664	1.07346	5.05701	2.88573	2.82517	0.0927971	0.430761
ENSG00000172578	kelch-like family member 6 [Source:HGNC Symbol;Acc:18653]	KLHL6	protein_coding	-1.13464	3.14844	4.47609	4.28781	1.897	4.16342	2.1058	4.2257	2.81945	0.0931281	0.43193
ENSG00000165275	tRNA methyltransferase 10 homolog B (S. cerevisiae) [Source:HGNC Symbol;Acc:26454]	TRMT10B	protein_coding	-1.58919	3.7521	2.61713	5.00307	2.62363	5.02872	2.61977	5.01526	2.8186	0.0931779	0.43193
ENSG00000129636	integrin alpha FG-GAP repeat containing 1 [Source:HGNC Symbol;Acc:30697]	ITFG1	protein_coding	-2.44712	6.32035	1.41864	5.20407	5.43627	8.28614	5.36353	7.43419	2.81631	0.0933107	0.432247
ENSG00000157020	SEC13 homolog (S. cerevisiae) [Source:HGNC Symbol;Acc:10697]	SEC13	protein_coding	-2.71334	6.05844	1.41864	6.3101	4.89682	7.77904	4.83112	7.22538	2.81511	0.0933803	0.432271
ENSG00000140526	abhydrolase domain containing 2 [Source:HGNC Symbol;Acc:18717]	ABHD2	protein_coding	1.57399	6.992	9.69637	3.97454	7.05252	7.59008	7.45542	6.67444	2.81138	0.0935977	0.432936
ENSG00000133789	SWAP switching B-cell complex 70kDa subunit [Source:HGNC Symbol;Acc:17070]	SWAP70	protein_coding	1.65014	7.79032	12.3107	6.75501	5.9244	6.33317	8.58021	6.56794	2.81043	0.0936532	0.432936
ENSG00000149418	suppression of tumorigenicity 14 (colon carcinoma) [Source:HGNC Symbol;Acc:11344]	ST14	protein_coding	-2.64353	5.8997	1.41864	3.7884	4.95888	7.93195	4.89245	7.00752	2.8084	0.0937719	0.433186
ENSG00000117899	mesoderm development candidate 2 [Source:HGNC Symbol;Acc:13520]	MESDC2	protein_coding	2.10976	5.67415	2.80269	5.53664	5.92785	4.25437	5.85561	5.04872	2.80559	0.0939363	0.433647
ENSG00000086232	eukaryotic translation initiation factor 2-alpha kinase 1 [Source:HGNC Symbol;Acc:24921]	EIF2AK1	protein_coding	-2.08441	4.78126	1.41864	6.48261	3.31819	5.7526	3.2761	6.15782	2.80265	0.0941089	0.434145
ENSG00000100814	cyclin B1 interacting protein 1, E3 ubiquitin protein ligase [Source:HGNC Symbol;Acc:19437]	CCNB1IP1	protein_coding	1.97819	5.99767	3.17993	5.62129	6.35594	4.8192	6.28047	5.29384	2.79528	0.0945424	0.435844
ENSG00000181381	DEAD (Asp-Glu-Ala-Asp) box polypeptide 60-like [Source:HGNC Symbol;Acc:26429]	DDX60L	protein_coding	1.89501	4.32401	6.32071	1.80556	4.57046	3.93256	4.71888	3.22218	2.78924	0.0948995	0.43719
ENSG00000109787	Kruppel-like factor 3 (basic) [Source:HGNC Symbol;Acc:16516]	KLF3	protein_coding	2.22698	5.65764	2.05555	6.46834	5.74277	4.007	5.66949	5.72676	2.78645	0.0950643	0.437649
ENSG00000186432	karyopherin alpha 4 (importin alpha 3) [Source:HGNC Symbol;Acc:6397]	KPNA4	protein_coding	1.99861	5.99211	3.07856	5.57038	6.15255	4.76068	6.07929	5.26182	2.78512	0.0951435	0.437713
ENSG00000130669	p21 protein (Cdc42/Rac)-activated kinase 4 [Source:HGNC Symbol;Acc:16059]	PAK4	protein_coding	-1.14914	3.69548	4.7151	4.56775	2.59355	4.93216	2.74564	4.76485	2.78208	0.0953245	0.437967
ENSG00000115966	activating transcription factor 2 [Source:HGNC Symbol;Acc:784]	ATF2	protein_coding	3.20211	5.02496	2.41864	6.14747	4.89089	2.49199	4.82413	5.31656	2.78199	0.0953296	0.437967
ENSG00000167680	sema domain, transmembrane domain (TM), and cytoplasmic domain, (semaphorin) 6B [Source:HGNC Symbol;Acc:10739]	SEMA6B	protein_coding	-1.118	5.55093	6.74057	6.82484	4.31424	6.45364	4.58334	6.65237	2.78023	0.0954347	0.43815
ENSG00000103811	cathepsin H [Source:HGNC Symbol;Acc:2535]	CTSH	protein_coding	-3.69634	5.3178	1.41864	7.43076	1.80659	5.69292	1.79252	6.79706	2.77804	0.0955649	0.438448
ENSG00000173852	dpy-19-like 1 (C. elegans) [Source:HGNC Symbol;Acc:22205]	DPY19L1	protein_coding	-2.54184	5.02073	1.41864	1.27048	3.9362	6.70065	3.88457	5.7441	2.77471	0.095764	0.43906
ENSG00000184203	protein phosphatase 1, regulatory (inhibitor) subunit 2 [Source:HGNC Symbol;Acc:9288]	PPP1R2	protein_coding	-1.38062	6.16416	5.03276	4.98655	5.41962	7.67128	5.40043	6.90289	2.77314	0.0958579	0.43919
ENSG00000130165	elongation factor 1 homolog (S. cerevisiae) [Source:HGNC Symbol;Acc:28691]	ELOF1	protein_coding	-3.08057	4.69186	1.41864	5.44033	2.95433	6.17958	2.91952	5.84467	2.77126	0.0959704	0.439406
ENSG00000145685	lipoma HMGIC fusion partner-like 2 [Source:HGNC Symbol;Acc:6588]	LHFPL2	protein_coding	2.35663	5.55502	4.37004	3.85766	5.98772	4.38382	5.93084	4.14497	2.76808	0.0961613	0.439501
ENSG00000124614	ribosomal protein S10 [Source:HGNC Symbol;Acc:10383]	RPS10	protein_coding	1.83763	8.83948	2.09671	8.45403	9.02786	7.40675	8.93216	8.0237	2.76777	0.09618	0.439501
ENSG00000101444	adenosylhomocysteinase [Source:HGNC Symbol;Acc:343]	AHCY	protein_coding	3.93144	5.96838	1.41864	1.94516	6.31837	3.3637	6.23637	2.7495	2.76662	0.0962493	0.439501
ENSG00000005020	src kinase associated phosphoprotein 2 [Source:HGNC Symbol;Acc:15687]	SKAP2	protein_coding	2.36428	6.06854	9.68552	4.99988	5.38247	4.70714	6.42941	4.86402	2.76655	0.0962536	0.439501
ENSG00000145431	platelet derived growth factor C [Source:HGNC Symbol;Acc:8801]	PDGFC	protein_coding	-3.60896	5.46999	1.41864	6.16678	3.59687	7.407	3.54982	6.92486	2.76459	0.0963714	0.43974
ENSG00000135845	phosphatidylinositol glycan anchor biosynthesis, class C [Source:HGNC Symbol;Acc:8960]	PIGC	protein_coding	4.44571	5.48258	1.41864	5.58262	5.68862	2.30045	5.61227	4.83777	2.76306	0.0964639	0.439862
ENSG00000134294	solute carrier family 38, member 2 [Source:HGNC Symbol;Acc:13448]	SLC38A2	protein_coding	2.48016	8.02512	2.41864	8.03017	8.25691	6.24093	8.16385	7.41445	2.75781	0.0967804	0.441005
ENSG00000177427	mitochondrial elongation factor 2 [Source:HGNC Symbol;Acc:17920]	MIEF2	protein_coding	-1.29851	3.68047	3.70256	3.53275	2.70233	5.2702	2.74863	4.6493	2.75531	0.0969322	0.441397
ENSG00000182318	zinc finger and SCAN domain containing 22 [Source:HGNC Symbol;Acc:4929]	ZSCAN22	protein_coding	-1.26464	5.85071	5.7184	4.56545	5.01218	8.03676	5.05552	7.15572	2.74674	0.0974531	0.442732
ENSG00000171223	jun B proto-oncogene [Source:HGNC Symbol;Acc:6205]	JUNB	protein_coding	1.93999	4.24355	2.0036	0.353986	4.65375	3.84478	4.59426	2.91497	2.74672	0.0974543	0.442732
ENSG00000136156	integral membrane protein 2B [Source:HGNC Symbol;Acc:6174]	ITM2B	protein_coding	-1.55566	7.2919	4.11908	8.10361	6.05334	8.07642	5.99255	8.09005	2.74656	0.0974637	0.442732
ENSG00000128915	NMDA receptor regulated 2 [Source:HGNC Symbol;Acc:29885]	NARG2	protein_coding	-1.81055	5.63566	1.41864	6.82968	4.44958	7.0758	4.3909	6.95565	2.7459	0.0975039	0.442732
ENSG00000184939	ZFP90 zinc finger protein [Source:HGNC Symbol;Acc:23329]	ZFP90	protein_coding	-3.42679	3.90985	1.41864	5.93384	1.63383	5.05831	1.62366	5.57042	2.74506	0.0975556	0.442732
ENSG00000049860	hexosaminidase B (beta polypeptide) [Source:HGNC Symbol;Acc:4879]	HEXB	protein_coding	3.46035	6.11571	1.41864	6.04102	6.60518	3.31354	6.51293	5.30895	2.74356	0.0976468	0.442782
ENSG00000139233	LLP homolog, long-term synaptic facilitation (Aplysia) [Source:HGNC Symbol;Acc:28229]	LLPH	protein_coding	2.72122	4.78681	2.44367	5.39813	4.75967	2.92518	4.70406	4.71767	2.73813	0.0979796	0.442782
ENSG00000169627	bolA family member 2B [Source:HGNC Symbol;Acc:32479]	BOLA2B	protein_coding	1.59171	4.41377	7.49374	3.15628	4.21042	4.41853	4.7	3.9085	2.73779	0.0980004	0.442782
ENSG00000168393	deoxythymidylate kinase (thymidylate kinase) [Source:HGNC Symbol;Acc:3061]	DTYMK	protein_coding	-1.16068	3.31961	2.52298	4.17232	2.41171	4.12794	2.41172	4.14996	2.73763	0.09801	0.442782
ENSG00000196535	myosin XVIIIA [Source:HGNC Symbol;Acc:31104]	MYO18A	protein_coding	2.63774	5.9148	10.549	6.43956	3.51976	2.46963	6.62143	5.48906	2.73747	0.0980199	0.442782
ENSG00000100462	protein arginine methyltransferase 5 [Source:HGNC Symbol;Acc:10894]	PRMT5	protein_coding	4.92677	5.89329	1.41864	1.83852	6.57536	2.3787	6.49214	2.11871	2.73697	0.0980505	0.442782
ENSG00000147548	Wolf-Hirschhorn syndrome candidate 1-like 1 [Source:HGNC Symbol;Acc:12767]	WHSC1L1	protein_coding	-2.03278	6.4961	6.97323	7.63989	4.70301	7.86424	4.9453	7.75703	2.73677	0.0980628	0.442782
ENSG00000163131	cathepsin S [Source:HGNC Symbol;Acc:2545]	CTSS	protein_coding	-1.62994	6.39735	4.5438	5.54693	5.44458	8.19171	5.40906	7.41794	2.73624	0.0980951	0.442782
ENSG00000151575	testis expressed 9 [Source:HGNC Symbol;Acc:29585]	TEX9	protein_coding	-1.25811	2.85747	5.13563	4.20461	1.20317	3.72906	1.71464	3.99898	2.7345	0.0982023	0.442968
ENSG00000005483	lysine (K)-specific methyltransferase 2E [Source:HGNC Symbol;Acc:18541]	KMT2E	protein_coding	-1.3608	7.80963	4.14438	8.53953	7.14908	8.89813	7.07038	8.73008	2.73211	0.0983496	0.443334
ENSG00000183354	KIAA2026 [Source:HGNC Symbol;Acc:23378]	KIAA2026	protein_coding	3.11662	4.53439	1.41864	3.59975	4.95052	2.51662	4.88248	3.16718	2.72745	0.0986366	0.444329
ENSG00000169499	pleckstrin homology domain containing, family A (phosphoinositide binding specific) member 2 [Source:HGNC Symbol;Acc:14336]	PLEKHA2	protein_coding	-1.80935	5.35121	3.06711	6.48411	4.5153	6.73983	4.47041	6.61669	2.72257	0.0989385	0.445389
ENSG00000129691	ash2 (absent, small, or homeotic)-like (Drosophila) [Source:HGNC Symbol;Acc:744]	ASH2L	protein_coding	1.6657	4.07289	5.36817	4.24724	4.35007	3.334	4.41123	3.85186	2.7085	0.0998151	0.448919
ENSG00000112701	SUMO1/sentrin specific peptidase 6 [Source:HGNC Symbol;Acc:20944]	SENP6	protein_coding	1.60587	7.13825	11.3011	6.12423	5.92346	6.42418	7.74381	6.28361	2.70783	0.0998565	0.448919
ENSG00000160710	adenosine deaminase, RNA-specific [Source:HGNC Symbol;Acc:225]	ADAR	protein_coding	1.52091	7.76446	7.34393	8.88998	7.47767	6.76229	7.4693	8.19224	2.70665	0.0999306	0.448951
ENSG00000072778	acyl-CoA dehydrogenase, very long chain [Source:HGNC Symbol;Acc:92]	ACADVL	protein_coding	-1.60668	6.90963	5.27662	6.00048	6.01867	8.47131	5.98464	7.7187	2.70512	0.100027	0.449021
ENSG00000066933	myosin IXA [Source:HGNC Symbol;Acc:7608]	MYO9A	protein_coding	3.14895	3.56071	3.0036	0.353986	3.82671	2.73697	3.79841	1.89175	2.70401	0.100096	0.449021
ENSG00000109016	dehydrogenase/reductase (SDR family) member 7B [Source:HGNC Symbol;Acc:24547]	DHRS7B	protein_coding	2.68503	5.7671	1.6513	6.57496	5.99642	3.45377	5.91835	5.76114	2.70218	0.100211	0.449021
ENSG00000143947	ribosomal protein S27a [Source:HGNC Symbol;Acc:10417]	RPS27A	protein_coding	1.00795	9.62044	8.68073	8.69829	9.77493	9.24161	9.72368	8.99463	2.70213	0.100214	0.449021
ENSG00000136997	v-myc avian myelocytomatosis viral oncogene homolog [Source:HGNC Symbol;Acc:7553]	MYC	protein_coding	3.81899	4.55455	1.41864	1.48854	5.05395	2.31963	4.98666	1.94058	2.70021	0.100335	0.449264
ENSG00000258169	long intergenic non-protein coding RNA 485 [Source:HGNC Symbol;Acc:27476]	LINC00485	lincRNA	-1.18943	3.58765	3.26664	4.01454	2.83172	4.81598	2.84602	4.47242	2.6985	0.100443	0.449444
ENSG00000137074	aprataxin [Source:HGNC Symbol;Acc:15984]	APTX	protein_coding	4.48907	4.48595	1.41864	4.50603	4.71521	1.76871	4.65117	3.68773	2.69492	0.100669	0.450155
ENSG00000249699		RP11-415C15.2	lincRNA	-1.44682	3.5152	3.60609	4.31672	2.60851	4.83731	2.65224	4.61277	2.68796	0.101109	0.451745
ENSG00000109445	zinc finger protein 330 [Source:HGNC Symbol;Acc:15462]	ZNF330	protein_coding	-3.80463	6.01009	1.41864	2.4501	4.12754	8.38142	4.06924	7.34354	2.68705	0.101167	0.451745
ENSG00000142949	protein tyrosine phosphatase, receptor type, F [Source:HGNC Symbol;Acc:9670]	PTPRF	protein_coding	-1.51894	7.026	5.59934	8.43306	5.53544	7.90811	5.5374	8.19463	2.68611	0.101226	0.451745
ENSG00000118762	polycystic kidney disease 2 (autosomal dominant) [Source:HGNC Symbol;Acc:9009]	PKD2	protein_coding	-2.62876	3.70053	1.41864	5.77943	1.95373	4.3516	1.93561	5.2462	2.68394	0.101365	0.45206
ENSG00000159433	StAR-related lipid transfer (START) domain containing 9 [Source:HGNC Symbol;Acc:19162]	STARD9	protein_coding	-1.04744	4.20762	4.97323	5.36063	3.16263	4.96032	3.28914	5.17113	2.68112	0.101544	0.452561
ENSG00000068650	ATPase, class VI, type 11A [Source:HGNC Symbol;Acc:13552]	ATP11A	protein_coding	-2.41291	5.46258	2.0036	7.98403	3.32953	6.11352	3.29196	7.31389	2.6785	0.101712	0.452915
ENSG00000111674	enolase 2 (gamma, neuronal) [Source:HGNC Symbol;Acc:3353]	ENO2	protein_coding	-3.38824	5.05282	1.41864	3.3817	3.36038	7.18414	3.31935	6.27639	2.67776	0.101759	0.452915
ENSG00000078061	v-raf murine sarcoma 3611 viral oncogene homolog [Source:HGNC Symbol;Acc:646]	ARAF	protein_coding	4.13598	5.37963	1.41864	3.95416	5.78186	2.65757	5.70595	3.40176	2.67432	0.101979	0.453539
ENSG00000135341	mitogen-activated protein kinase kinase kinase 7 [Source:HGNC Symbol;Acc:6859]	MAP3K7	protein_coding	-2.78177	5.55096	3.87807	4.14709	3.43487	7.82308	3.45077	6.93694	2.67345	0.102034	0.453539
ENSG00000163602	RING1 and YY1 binding protein [Source:HGNC Symbol;Acc:10480]	RYBP	protein_coding	-2.9532	4.883	1.41864	3.88475	3.52369	6.92474	3.48	6.04212	2.66238	0.102747	0.456403
ENSG00000196950	solute carrier family 39 (zinc transporter), member 10 [Source:HGNC Symbol;Acc:20861]	SLC39A10	protein_coding	4.82398	7.03751	1.41864	9.15002	4.09077	1.24235	4.03813	8.16216	2.65936	0.102942	0.456496
ENSG00000196214	zinc finger protein 766 [Source:HGNC Symbol;Acc:28063]	ZNF766	protein_coding	2.17068	5.59655	5.51076	7.10451	5.15705	3.7125	5.17481	6.2643	2.65904	0.102963	0.456496
ENSG00000183597	transport and golgi organization 2 homolog (Drosophila) [Source:HGNC Symbol;Acc:25439]	TANGO2	protein_coding	-1.08683	6.28327	7.74111	6.03154	5.08721	8.18091	5.44715	7.47743	2.6589	0.102972	0.456496
ENSG00000154153	family with sequence similarity 134, member B [Source:HGNC Symbol;Acc:25964]	FAM134B	protein_coding	4.64726	4.78438	1.41864	0.353986	5.68643	1.93108	5.61098	1.27958	2.65518	0.103213	0.457263
ENSG00000125818	proteasome (prosome, macropain) inhibitor subunit 1 (PI31) [Source:HGNC Symbol;Acc:9571]	PSMF1	protein_coding	1.81948	7.59	10.1984	7.78678	7.18519	6.50682	7.71	7.28116	2.65111	0.103478	0.457971
ENSG00000108669	cytohesin 1 [Source:HGNC Symbol;Acc:9501]	CYTH1	protein_coding	2.88912	3.1859	1.41864	3.29144	3.37774	1.72242	3.33365	2.77202	2.65062	0.10351	0.457971
ENSG00000171451	dermatan sulfate epimerase-like [Source:HGNC Symbol;Acc:18144]	DSEL	protein_coding	-1.69422	3.6211	1.41864	5.40059	1.96681	3.62088	1.9486	4.80801	2.64733	0.103724	0.458615
ENSG00000138326	ribosomal protein S24 [Source:HGNC Symbol;Acc:10411]	RPS24	protein_coding	0.971054	8.6107	8.83649	7.71231	8.66511	8.44311	8.67652	8.12278	2.6429	0.104013	0.459389
ENSG00000121022	COP9 signalosome subunit 5 [Source:HGNC Symbol;Acc:2240]	COPS5	protein_coding	2.34458	6.85123	3.1778	7.08143	6.54529	4.71842	6.46786	6.36189	2.64202	0.104071	0.459389
ENSG00000156232	WAS protein homolog associated with actin, golgi membranes and microtubules [Source:HGNC Symbol;Acc:30493]	WHAMM	protein_coding	-1.67574	5.59949	3.47175	6.94495	4.476	6.56516	4.4414	6.76265	2.64151	0.104105	0.459389
ENSG00000132300	pentatricopeptide repeat domain 3 [Source:HGNC Symbol;Acc:24717]	PTCD3	protein_coding	-1.88208	6.64143	4.23114	6.56928	5.92159	7.66899	5.86437	7.21791	2.63799	0.104335	0.460105
ENSG00000049239	hexose-6-phosphate dehydrogenase (glucose 1-dehydrogenase) [Source:HGNC Symbol;Acc:4795]	H6PD	protein_coding	-1.38604	3.87556	1.89891	4.07509	3.20942	5.03378	3.17427	4.62502	2.635	0.104532	0.46067
ENSG00000104671	dynactin 6 [Source:HGNC Symbol;Acc:16964]	DCTN6	protein_coding	2.02885	5.68684	3.30617	3.03934	6.21353	4.64557	6.14091	4.07651	2.6324	0.104703	0.461074
ENSG00000156510	hexokinase domain containing 1 [Source:HGNC Symbol;Acc:23302]	HKDC1	protein_coding	-1.94853	2.74043	1.41864	5.21231	-0.0429601	0.871547	0.01749	4.21203	2.63152	0.104761	0.461074
ENSG00000089053	anaphase promoting complex subunit 5 [Source:HGNC Symbol;Acc:15713]	ANAPC5	protein_coding	1.72006	6.28931	4.47436	7.08488	6.41084	5.2083	6.34768	6.41571	2.63037	0.104838	0.461107
ENSG00000134910	STT3A, subunit of the oligosaccharyltransferase complex (catalytic) [Source:HGNC Symbol;Acc:6172]	STT3A	protein_coding	2.17281	8.1448	1.41864	7.63893	8.3756	6.38693	8.28154	7.14666	2.62612	0.105118	0.462038
ENSG00000115286	NADH dehydrogenase (ubiquinone) Fe-S protein 7, 20kDa (NADH-coenzyme Q reductase) [Source:HGNC Symbol;Acc:7714]	NDUFS7	protein_coding	1.30259	5.58841	9.36417	6.01332	4.73908	4.83469	5.94087	5.53031	2.61797	0.10566	0.464113
ENSG00000099812	mitotic spindle positioning [Source:HGNC Symbol;Acc:27000]	MISP	protein_coding	-4.41225	4.32918	1.41864	4.76553	2.20632	6.47885	2.18306	5.86128	2.60419	0.106582	0.467775
ENSG00000225470	JPX transcript, XIST activator (non-protein coding) [Source:HGNC Symbol;Acc:37191]	JPX	lincRNA	1.12608	7.26345	11.0055	6.95406	6.54412	7.04434	7.78014	6.99958	2.60343	0.106633	0.467775
ENSG00000169247	SH3 domain and tetratricopeptide repeats 2 [Source:HGNC Symbol;Acc:29427]	SH3TC2	protein_coding	-1.33499	4.53388	4.08198	6.25334	2.76102	4.5586	2.83213	5.7101	2.6007	0.106816	0.468274
ENSG00000170606	heat shock 70kDa protein 4 [Source:HGNC Symbol;Acc:5237]	HSPA4	protein_coding	2.88632	5.83982	1.41864	4.36213	6.27332	3.93903	6.19022	4.18099	2.59952	0.106896	0.468317
ENSG00000115594	interleukin 1 receptor, type I [Source:HGNC Symbol;Acc:5993]	IL1R1	protein_coding	-1.93068	5.08175	2.60767	5.46161	4.06179	6.37524	4.01837	5.99369	2.59843	0.10697	0.468333
ENSG00000147601	telomeric repeat binding factor (NIMA-interacting) 1 [Source:HGNC Symbol;Acc:11728]	TERF1	protein_coding	1.25399	5.78137	8.29454	5.80125	5.68996	5.36728	6.05838	5.59387	2.59624	0.107118	0.468614
ENSG00000109133	transmembrane protein 33 [Source:HGNC Symbol;Acc:25541]	TMEM33	protein_coding	2.02786	8.37988	2.73189	9.43724	8.371	6.68881	8.27786	8.63296	2.59395	0.107272	0.468614
ENSG00000138162	transforming, acidic coiled-coil containing protein 2 [Source:HGNC Symbol;Acc:11523]	TACC2	protein_coding	-1.46144	4.2646	3.35975	3.6213	3.45626	5.80266	3.44959	5.10305	2.59381	0.107282	0.468614
ENSG00000104517	ubiquitin protein ligase E3 component n-recognin 5 [Source:HGNC Symbol;Acc:16806]	UBR5	protein_coding	-1.65331	7.3649	4.71069	6.36624	6.42398	8.60924	6.3647	7.88419	2.59335	0.107313	0.468614
ENSG00000126247	calpain, small subunit 1 [Source:HGNC Symbol;Acc:1481]	CAPNS1	protein_coding	-1.62593	7.21487	1.41864	7.71503	6.25278	8.47806	6.17173	8.14491	2.59062	0.107498	0.468968
ENSG00000170540	ADP-ribosylation factor-like 6 interacting protein 1 [Source:HGNC Symbol;Acc:697]	ARL6IP1	protein_coding	-1.76956	7.81625	1.41864	8.4085	6.92818	9.04212	6.84132	8.75902	2.59009	0.107535	0.468968
ENSG00000176853	family with sequence similarity 91, member A1 [Source:HGNC Symbol;Acc:26306]	FAM91A1	protein_coding	2.14971	6.59445	8.89137	7.51664	6.42587	4.9738	6.76938	6.72563	2.58738	0.107718	0.469193
ENSG00000049656	CLPTM1-like [Source:HGNC Symbol;Acc:24308]	CLPTM1L	protein_coding	3.00886	4.42636	7.03335	3.96797	4.59659	2.67485	4.87321	3.51673	2.58727	0.107726	0.469193
ENSG00000118620	zinc finger protein 430 [Source:HGNC Symbol;Acc:20808]	ZNF430	protein_coding	-1.17972	3.92309	3.17566	3.80529	3.16079	5.14657	3.15795	4.62814	2.58148	0.108121	0.470394
ENSG00000067182	tumor necrosis factor receptor superfamily, member 1A [Source:HGNC Symbol;Acc:11916]	TNFRSF1A	protein_coding	1.38952	5.10585	3.79437	4.73619	5.35185	4.53137	5.30086	4.63521	2.58116	0.108142	0.470394
ENSG00000119280	chromosome 1 open reading frame 198 [Source:HGNC Symbol;Acc:25900]	C1orf198	protein_coding	-2.94134	6.7537	1.41864	6.57193	5.43296	8.47132	5.36065	7.82502	2.5801	0.108215	0.470405
ENSG00000197296	fat storage-inducing transmembrane protein 2 [Source:HGNC Symbol;Acc:16135]	FITM2	protein_coding	1.52871	5.03275	4.89113	3.86134	5.41065	4.35558	5.38476	4.11867	2.57884	0.108301	0.470455
ENSG00000189180	zinc finger protein 33A [Source:HGNC Symbol;Acc:13096]	ZNF33A	protein_coding	2.45994	6.7688	2.38949	6.09799	7.30787	5.41511	7.22007	5.81003	2.57607	0.108491	0.470455
ENSG00000161016	ribosomal protein L8 [Source:HGNC Symbol;Acc:10368]	RPL8	protein_coding	1.3324	9.92496	5.8449	8.96909	10.0965	9.26249	10.0037	9.12273	2.57475	0.108581	0.470455
ENSG00000085982	ubiquitin specific peptidase 40 [Source:HGNC Symbol;Acc:20069]	USP40	protein_coding	-3.70554	5.3506	1.41864	7.26796	2.20813	6.51885	2.18436	6.94767	2.57368	0.108655	0.470455
ENSG00000196533	chromosome 1 open reading frame 186 [Source:HGNC Symbol;Acc:25341]	C1orf186	protein_coding	-2.19812	6.26348	10.9998	3.52906	1.99579	6.00973	6.98614	5.25975	2.57317	0.10869	0.470455
ENSG00000165376	claudin 2 [Source:HGNC Symbol;Acc:2041]	CLDN2	protein_coding	-0.910085	4.97275	1.41864	7.42999	-0.0931393	0.64477	-0.0292957	6.5011	2.57285	0.108712	0.470455
ENSG00000128849	cingulin-like 1 [Source:HGNC Symbol;Acc:25931]	CGNL1	protein_coding	2.39518	4.71751	1.41864	4.71749	5.19623	2.97875	5.12733	4.08062	2.5715	0.108805	0.470455
ENSG00000113273	arylsulfatase B [Source:HGNC Symbol;Acc:714]	ARSB	protein_coding	-1.97871	3.50266	1.41864	4.10058	2.46363	4.62532	2.43541	4.38331	2.57052	0.108872	0.470455
ENSG00000118263	Kruppel-like factor 7 (ubiquitous) [Source:HGNC Symbol;Acc:6350]	KLF7	protein_coding	3.93275	6.42747	1.41864	4.88534	7.07953	3.68887	6.99216	4.40962	2.57033	0.108885	0.470455
ENSG00000234745	major histocompatibility complex, class I, B [Source:HGNC Symbol;Acc:4932]	HLA-B	protein_coding	-1.21208	8.07017	10.6513	8.2585	6.32005	9.74762	7.44066	9.18668	2.5697	0.108928	0.470455
ENSG00000185721	developmentally regulated GTP binding protein 1 [Source:HGNC Symbol;Acc:3029]	DRG1	protein_coding	3.69591	4.86706	1.41864	4.16009	5.17174	2.46409	5.10378	3.58345	2.56808	0.10904	0.470587
ENSG00000151532	vesicle transport through interaction with t-SNAREs 1A [Source:HGNC Symbol;Acc:17792]	VTI1A	protein_coding	-1.18016	5.23709	6.43612	6.00788	4.01062	6.45149	4.26608	6.23904	2.56722	0.109099	0.470587
ENSG00000103160	hydroxysteroid dehydrogenase like 1 [Source:HGNC Symbol;Acc:16475]	HSDL1	protein_coding	3.80718	4.06868	1.41864	5.87316	3.66718	1.52499	3.61966	4.85309	2.56387	0.109331	0.471052
ENSG00000164587	ribosomal protein S14 [Source:HGNC Symbol;Acc:10387]	RPS14	protein_coding	1.30516	10.0102	8.67409	8.6694	10.2064	9.51579	10.1429	9.15279	2.56362	0.109348	0.471052
ENSG00000146112	protein phosphatase 1, regulatory subunit 18 [Source:HGNC Symbol;Acc:29413]	PPP1R18	protein_coding	5.29751	4.34044	1.41864	2.97304	4.74256	1.3028	4.68032	2.46364	2.56147	0.109497	0.471392
ENSG00000108559	nucleoporin 88kDa [Source:HGNC Symbol;Acc:8067]	NUP88	protein_coding	2.89529	5.12769	1.41864	5.82637	5.34803	3.08346	5.27675	5.10825	2.55862	0.109694	0.47194
ENSG00000066455	golgin A5 [Source:HGNC Symbol;Acc:4428]	GOLGA5	protein_coding	-3.00184	4.96373	1.41864	3.48416	3.57654	7.01878	3.5272	6.15366	2.55484	0.109957	0.472707
ENSG00000061987	MON2 homolog (S. cerevisiae) [Source:HGNC Symbol;Acc:29177]	MON2	protein_coding	2.16327	3.6314	3.97935	2.87992	3.8327	2.62697	3.8365	2.75605	2.55369	0.110037	0.472707
ENSG00000185024	BRF1, RNA polymerase III transcription initiation factor 90 kDa subunit [Source:HGNC Symbol;Acc:11551]	BRF1	protein_coding	-0.918853	5.1322	6.60094	6.22158	3.98745	6.12465	4.28483	6.17432	2.55222	0.110139	0.472707
ENSG00000100364	KIAA0930 [Source:HGNC Symbol;Acc:1314]	KIAA0930	protein_coding	-2.25132	4.86627	1.41864	5.07746	3.47262	6.59634	3.42827	6.01447	2.552	0.110155	0.472707
ENSG00000168036	catenin (cadherin-associated protein), beta 1, 88kDa [Source:HGNC Symbol;Acc:2514]	CTNNB1	protein_coding	-1.2069	7.39872	4.58856	7.95535	6.69912	8.23891	6.63177	8.10347	2.54932	0.110342	0.473044
ENSG00000167257	ring finger protein 214 [Source:HGNC Symbol;Acc:25335]	RNF214	protein_coding	3.63896	4.23068	1.41864	3.47597	4.74421	1.70181	4.67612	2.86298	2.54885	0.110375	0.473044
ENSG00000099337	potassium channel, subfamily K, member 6 [Source:HGNC Symbol;Acc:6281]	KCNK6	protein_coding	4.5167	5.48532	1.41864	6.59536	4.61934	1.28485	4.5532	5.58299	2.54696	0.110507	0.473308
ENSG00000053524	MCF.2 cell line derived transforming sequence-like 2 [Source:HGNC Symbol;Acc:30319]	MCF2L2	protein_coding	-0.903226	4.4282	5.05091	5.6636	3.42331	5.20754	3.53265	5.45757	2.54369	0.110736	0.473707
ENSG00000069399	B-cell CLL/lymphoma 3 [Source:HGNC Symbol;Acc:998]	BCL3	protein_coding	-2.06249	3.73188	1.41864	4.50035	2.67392	4.72543	2.64149	4.61726	2.54361	0.110741	0.473707
ENSG00000140406	mesoderm development candidate 1 [Source:HGNC Symbol;Acc:13519]	MESDC1	protein_coding	2.46384	3.31465	1.41864	2.55943	3.38189	1.96406	3.33873	2.2922	2.54179	0.110869	0.473741
ENSG00000091592	NLR family, pyrin domain containing 1 [Source:HGNC Symbol;Acc:14374]	NLRP1	protein_coding	-1.08483	3.48062	4.48989	4.29301	2.36417	4.42474	2.51853	4.36167	2.54148	0.110891	0.473741
ENSG00000115392	Fanconi anemia, complementation group L [Source:HGNC Symbol;Acc:20748]	FANCL	protein_coding	2.91588	5.59394	1.41864	3.18315	6.1364	3.84531	6.05577	3.56039	2.53684	0.111217	0.474598
ENSG00000142634	EF-hand domain family, member D2 [Source:HGNC Symbol;Acc:28670]	EFHD2	protein_coding	3.80817	3.42046	1.41864	2.39678	3.57081	1.49005	3.52415	2.06879	2.53662	0.111233	0.474598
ENSG00000146281	peptidase M20 domain containing 2 [Source:HGNC Symbol;Acc:21408]	PM20D2	protein_coding	-1.59554	4.22984	1.41864	2.55356	3.79746	5.72661	3.74653	4.92976	2.534	0.111418	0.475084
ENSG00000151882	chemokine (C-C motif) ligand 28 [Source:HGNC Symbol;Acc:17700]	CCL28	protein_coding	-2.12404	7.62765	4.50015	9.3163	5.49735	8.09852	5.4589	8.8367	2.52982	0.111713	0.475974
ENSG00000110711	aryl hydrocarbon receptor interacting protein [Source:HGNC Symbol;Acc:358]	AIP	protein_coding	4.23052	4.74125	1.41864	0.460333	5.3723	1.52989	5.30005	1.03638	2.52885	0.111782	0.475974
ENSG00000006740	Rho GTPase activating protein 44 [Source:HGNC Symbol;Acc:29096]	ARHGAP44	protein_coding	1.88092	5.13688	4.59656	4.28269	5.54003	4.21413	5.49439	4.24751	2.52742	0.111883	0.475974
ENSG00000124356	STAM binding protein [Source:HGNC Symbol;Acc:16950]	STAMBP	protein_coding	-2.36939	6.37179	1.41864	8.96995	4.19157	6.87885	4.13523	8.26045	2.52698	0.111914	0.475974
ENSG00000107897	acyl-CoA binding domain containing 5 [Source:HGNC Symbol;Acc:23338]	ACBD5	protein_coding	2.0052	4.33096	1.41864	4.87909	4.22619	3.13461	4.17216	4.30158	2.52572	0.112004	0.475974
ENSG00000143748	nuclear VCP-like [Source:HGNC Symbol;Acc:8070]	NVL	protein_coding	2.19234	4.7934	4.2229	3.64069	5.25517	3.54337	5.21201	3.59288	2.52494	0.112059	0.475974
ENSG00000104133	spastic paraplegia 11 (autosomal recessive) [Source:HGNC Symbol;Acc:11226]	SPG11	protein_coding	-1.4096	5.88948	3.63276	6.50646	5.13029	6.76871	5.0813	6.64072	2.52237	0.112242	0.475974
ENSG00000135750	potassium channel, subfamily K, member 1 [Source:HGNC Symbol;Acc:6272]	KCNK1	protein_coding	3.42994	4.89048	1.41864	4.38007	5.19683	2.76252	5.12664	3.85473	2.52199	0.112269	0.475974
ENSG00000123136	DEAD (Asp-Glu-Ala-Asp) box polypeptide 39A [Source:HGNC Symbol;Acc:17821]	DDX39A	protein_coding	-2.75246	4.96734	1.41864	3.84171	3.84382	7.2511	3.79361	6.36253	2.52178	0.112284	0.475974
ENSG00000147676	mal, T-cell differentiation protein 2 (gene/pseudogene) [Source:HGNC Symbol;Acc:13634]	MAL2	protein_coding	-2.21365	6.73974	1.41864	6.81016	5.70698	8.28638	5.63097	7.72738	2.52104	0.112336	0.475974
ENSG00000119537	3-ketodihydrosphingosine reductase [Source:HGNC Symbol;Acc:4021]	KDSR	protein_coding	1.75687	5.14369	5.46041	5.85872	4.91809	3.83189	4.94747	5.16289	2.5163	0.112674	0.476115
ENSG00000151422	fer (fps/fes related) tyrosine kinase [Source:HGNC Symbol;Acc:3655]	FER	protein_coding	2.31369	5.6462	4.41864	6.35659	5.55836	4.20011	5.51524	5.6703	2.51545	0.112736	0.476115
ENSG00000173465	Sjogren syndrome/scleroderma autoantigen 1 [Source:HGNC Symbol;Acc:11328]	SSSCA1	protein_coding	3.09184	4.16692	3.58856	4.15103	4.46869	2.01545	4.43662	3.57719	2.51498	0.112769	0.476115
ENSG00000164308	endoplasmic reticulum aminopeptidase 2 [Source:HGNC Symbol;Acc:29499]	ERAP2	protein_coding	3.31897	5.49376	1.41864	7.22108	3.74841	1.69209	3.69976	6.28978	2.51473	0.112787	0.476115
ENSG00000173889	polyhomeotic homolog 3 (Drosophila) [Source:HGNC Symbol;Acc:15682]	PHC3	protein_coding	1.62426	5.33882	5.51372	5.80506	5.42903	4.24195	5.43198	5.21011	2.51431	0.112817	0.476115
ENSG00000064102	asunder spermatogenesis regulator [Source:HGNC Symbol;Acc:20174]	ASUN	protein_coding	-3.38808	4.20855	1.41864	5.85295	1.52149	5.14807	1.51416	5.56131	2.51321	0.112896	0.476115
ENSG00000197614	microfibrillar associated protein 5 [Source:HGNC Symbol;Acc:29673]	MFAP5	protein_coding	1.093	4.50926	7.75448	4.83396	3.87052	4.03928	4.59029	4.48036	2.51265	0.112936	0.476115
ENSG00000130413	serine/threonine kinase 33 [Source:HGNC Symbol;Acc:14568]	STK33	protein_coding	-1.46341	3.91606	5.17353	3.53183	2.41647	5.62361	2.67836	4.84821	2.5119	0.11299	0.476115
ENSG00000052126	pleckstrin homology domain containing, family A member 5 [Source:HGNC Symbol;Acc:30036]	PLEKHA5	protein_coding	-1.46983	6.39991	4.27762	5.91717	5.80855	7.93436	5.75653	7.2667	2.51163	0.113009	0.476115
ENSG00000010818	human immunodeficiency virus type I enhancer binding protein 2 [Source:HGNC Symbol;Acc:4921]	HIVEP2	protein_coding	-2.68551	5.18463	1.41864	5.63126	3.78798	6.78129	3.73725	6.30426	2.5082	0.113255	0.476183
ENSG00000173402	dystroglycan 1 (dystrophin-associated glycoprotein 1) [Source:HGNC Symbol;Acc:2666]	DAG1	protein_coding	1.83246	4.5172	1.41864	5.2963	4.55992	3.2689	4.49968	4.66151	2.50685	0.113353	0.476183
ENSG00000075790	B-cell receptor-associated protein 29 [Source:HGNC Symbol;Acc:24131]	BCAP29	protein_coding	1.47946	6.39133	5.94846	6.22089	6.40375	5.71545	6.38032	5.98867	2.50625	0.113395	0.476183
ENSG00000235493		AC092415.1	lincRNA	-1.49085	3.14132	1.41864	3.15936	2.50795	4.41176	2.47914	3.92071	2.50624	0.113396	0.476183
ENSG00000177888	zinc finger and BTB domain containing 41 [Source:HGNC Symbol;Acc:24819]	ZBTB41	protein_coding	-3.66846	5.25926	1.41864	3.20266	3.36772	7.47421	3.32288	6.5681	2.50574	0.113432	0.476183
ENSG00000110756	Hermansky-Pudlak syndrome 5 [Source:HGNC Symbol;Acc:17022]	HPS5	protein_coding	-1.8015	3.55818	2.41864	5.30255	2.23434	4.50168	2.2366	4.95278	2.50547	0.113451	0.476183
ENSG00000128463	ER membrane protein complex subunit 4 [Source:HGNC Symbol;Acc:28032]	EMC4	protein_coding	1.4787	7.83392	5.13013	8.03284	7.9759	7.06796	7.89562	7.6348	2.50154	0.113735	0.476732
ENSG00000103365	golgi-associated, gamma adaptin ear containing, ARF binding protein 2 [Source:HGNC Symbol;Acc:16064]	GGA2	protein_coding	1.97719	4.63582	2.51625	3.59273	4.9497	3.37538	4.87862	3.49172	2.50129	0.113753	0.476732
ENSG00000138231	debranching RNA lariats 1 [Source:HGNC Symbol;Acc:15594]	DBR1	protein_coding	2.41708	3.90045	3.13673	4.7345	3.65094	2.07481	3.62821	4.058	2.5007	0.113795	0.476732
ENSG00000089220	phosphatidylethanolamine binding protein 1 [Source:HGNC Symbol;Acc:8630]	PEBP1	protein_coding	1.4775	7.1053	10.7017	6.97948	6.27415	6.5045	7.44774	6.75626	2.49758	0.114021	0.476761
ENSG00000160352	zinc finger protein 714 [Source:HGNC Symbol;Acc:27124]	ZNF714	protein_coding	-1.06103	4.28765	5.67904	4.99801	3.13542	5.414	3.38413	5.20531	2.49751	0.114026	0.476761
ENSG00000109534	GAR1 ribonucleoprotein [Source:HGNC Symbol;Acc:14264]	GAR1	protein_coding	4.05162	3.24922	1.41864	1.41096	3.83478	1.14274	3.78547	1.28779	2.49692	0.114069	0.476761
ENSG00000142168	superoxide dismutase 1, soluble [Source:HGNC Symbol;Acc:11179]	SOD1	protein_coding	-1.50291	7.12902	3.91177	7.79998	6.38854	8.46484	6.31897	8.1663	2.49588	0.114144	0.476761
ENSG00000182871	collagen, type XVIII, alpha 1 [Source:HGNC Symbol;Acc:2195]	COL18A1	protein_coding	5.19789	4.28199	1.41864	5.86238	2.91382	0.764963	2.87986	4.9038	2.49569	0.114158	0.476761
ENSG00000105835	nicotinamide phosphoribosyltransferase [Source:HGNC Symbol;Acc:30092]	NAMPT	protein_coding	-1.77119	7.63911	2.6513	7.43269	6.83526	8.65241	6.75169	8.16769	2.49352	0.114316	0.477123
ENSG00000100558	pleckstrin 2 [Source:HGNC Symbol;Acc:19238]	PLEK2	protein_coding	4.22721	5.34727	1.41864	0.353986	5.63116	2.6857	5.55661	1.91897	2.49132	0.114476	0.477494
ENSG00000108587	golgi SNAP receptor complex member 1 [Source:HGNC Symbol;Acc:4430]	GOSR1	protein_coding	-1.21597	6.15875	3.61399	6.52382	5.45074	7.10865	5.39484	6.84414	2.48676	0.114808	0.47858
ENSG00000197223	C1D nuclear receptor corepressor [Source:HGNC Symbol;Acc:29911]	C1D	protein_coding	3.08442	4.1116	1.41864	5.51476	3.90492	1.89867	3.85311	4.70179	2.48198	0.115157	0.479551
ENSG00000163947	Rho guanine nucleotide exchange factor (GEF) 3 [Source:HGNC Symbol;Acc:683]	ARHGEF3	protein_coding	4.39963	4.52203	1.41864	3.69818	4.84002	1.349	4.7755	2.93909	2.48162	0.115184	0.479551
ENSG00000136100	vacuolar protein sorting 36 homolog (S. cerevisiae) [Source:HGNC Symbol;Acc:20312]	VPS36	protein_coding	-1.9145	5.24548	1.41864	5.12416	4.43624	6.92587	4.37432	6.26773	2.47835	0.115423	0.479874
ENSG00000167992	von Willebrand factor C and EGF domains [Source:HGNC Symbol;Acc:26487]	VWCE	protein_coding	1.03887	3.46569	6.74489	4.08681	2.62124	3.09732	3.31607	3.68775	2.47804	0.115446	0.479874
ENSG00000163584	ribosomal protein L22-like 1 [Source:HGNC Symbol;Acc:27610]	RPL22L1	protein_coding	-2.1223	3.79556	1.41864	1.87516	2.94215	5.7504	2.90513	4.84585	2.47763	0.115476	0.479874
ENSG00000177954	ribosomal protein S27 [Source:HGNC Symbol;Acc:10416]	RPS27	protein_coding	1.20278	9.29287	8.84909	8.37967	9.37939	8.80736	9.35007	8.60907	2.47013	0.116028	0.481869
ENSG00000163125	regulation of nuclear pre-mRNA domain containing 2 [Source:HGNC Symbol;Acc:29039]	RPRD2	protein_coding	2.53459	2.7969	1.41864	0.478037	3.12824	1.81845	3.08909	1.25194	2.46903	0.11611	0.481909
ENSG00000136870	zinc finger protein 189 [Source:HGNC Symbol;Acc:12980]	ZNF189	protein_coding	-2.72509	4.76811	1.41864	4.74964	3.53462	6.54426	3.48898	5.93218	2.46248	0.116595	0.483622
ENSG00000129226	CD68 molecule [Source:HGNC Symbol;Acc:1693]	CD68	protein_coding	2.58725	5.47205	1.41864	1.86047	5.80647	4.00459	5.72965	3.29062	2.45901	0.116852	0.483916
ENSG00000174437	ATPase, Ca++ transporting, cardiac muscle, slow twitch 2 [Source:HGNC Symbol;Acc:812]	ATP2A2	protein_coding	-1.50001	5.48159	1.83007	4.27413	4.86322	6.6269	4.79795	5.86283	2.45896	0.116856	0.483916
ENSG00000161955	tumor necrosis factor (ligand) superfamily, member 13 [Source:HGNC Symbol;Acc:11928]	TNFSF13	protein_coding	-3.68381	3.46834	1.41864	3.5833	1.55184	4.94153	1.54424	4.41027	2.45806	0.116923	0.483916
ENSG00000129197	RPA interacting protein [Source:HGNC Symbol;Acc:28641]	RPAIN	protein_coding	-1.47278	6.07106	3.91049	7.3681	4.50221	6.2497	4.47723	6.9066	2.45764	0.116954	0.483916
ENSG00000100813	apoptotic chromatin condensation inducer 1 [Source:HGNC Symbol;Acc:17066]	ACIN1	protein_coding	1.78058	5.12177	8.98443	5.55287	4.11281	3.96869	5.40256	4.93307	2.45598	0.117078	0.48413
ENSG00000065559	mitogen-activated protein kinase kinase 4 [Source:HGNC Symbol;Acc:6844]	MAP2K4	protein_coding	2.95049	5.63045	5.34559	4.51431	6.30694	3.87629	6.26121	4.21362	2.45258	0.117332	0.484423
ENSG00000154001	protein phosphatase 2, regulatory subunit B', epsilon isoform [Source:HGNC Symbol;Acc:9313]	PPP2R5E	protein_coding	-1.61737	6.67856	1.41864	7.07661	5.90822	7.99959	5.83031	7.60238	2.45227	0.117355	0.484423
ENSG00000087502	ERGIC and golgi 2 [Source:HGNC Symbol;Acc:30208]	ERGIC2	protein_coding	-1.42088	6.9253	4.42852	6.6031	6.39198	8.36287	6.32856	7.71762	2.45158	0.117406	0.484423
ENSG00000176046	nuclear protein, transcriptional regulator, 1 [Source:HGNC Symbol;Acc:29990]	NUPR1	protein_coding	3.39245	6.20943	1.41864	4.76666	6.60263	3.53974	6.51905	4.34118	2.45116	0.117438	0.484423
ENSG00000156261	chaperonin containing TCP1, subunit 8 (theta) [Source:HGNC Symbol;Acc:1623]	CCT8	protein_coding	2.78255	7.79184	1.41864	8.59183	7.77707	5.34919	7.6857	7.77205	2.45013	0.117515	0.484441
ENSG00000186468	ribosomal protein S23 [Source:HGNC Symbol;Acc:10410]	RPS23	protein_coding	1.34067	8.95425	3.51962	8.55901	9.01758	8.1161	8.92328	8.35492	2.44766	0.1177	0.484908
ENSG00000058272	protein phosphatase 1, regulatory subunit 12A [Source:HGNC Symbol;Acc:7618]	PPP1R12A	protein_coding	-1.46663	6.94516	2.0036	7.02836	6.34481	7.9832	6.26028	7.58757	2.44575	0.117844	0.485201
ENSG00000143457	golgi phosphoprotein 3-like [Source:HGNC Symbol;Acc:24882]	GOLPH3L	protein_coding	4.05209	5.53166	1.41864	2.60596	5.83814	2.69923	5.76246	2.64915	2.4432	0.118035	0.48569
ENSG00000147324	malignant fibrous histiocytoma amplified sequence 1 [Source:HGNC Symbol;Acc:16982]	MFHAS1	protein_coding	5.69577	5.53355	1.41864	6.64339	5.64896	1.46407	5.56761	5.72313	2.43965	0.118303	0.486245
ENSG00000102158	magnesium transporter 1 [Source:HGNC Symbol;Acc:28880]	MAGT1	protein_coding	1.75268	6.20946	2.67565	6.41918	6.3622	5.02714	6.28356	5.89899	2.43949	0.118315	0.486245
ENSG00000004487	lysine (K)-specific demethylase 1A [Source:HGNC Symbol;Acc:29079]	KDM1A	protein_coding	-2.69959	5.24563	1.41864	6.56296	3.40194	6.493	3.35758	6.52943	2.43736	0.118475	0.486605
ENSG00000146828	solute carrier family 12, member 9 [Source:HGNC Symbol;Acc:17435]	SLC12A9	protein_coding	-1.06888	4.27279	5.86556	5.38628	2.67378	4.68399	3.04292	5.07825	2.43622	0.118562	0.486662
ENSG00000101084	chromosome 20 open reading frame 24 [Source:HGNC Symbol;Acc:15870]	C20orf24	protein_coding	-2.93703	5.97832	1.41864	4.86557	4.73157	7.94484	4.66765	7.10344	2.43385	0.118741	0.4871
ENSG00000188313	phospholipid scramblase 1 [Source:HGNC Symbol;Acc:9092]	PLSCR1	protein_coding	2.13751	7.75378	2.0036	8.59682	7.85808	6.21889	7.76677	7.8471	2.42939	0.119079	0.488189
ENSG00000089123	taspase, threonine aspartase, 1 [Source:HGNC Symbol;Acc:15859]	TASP1	protein_coding	-3.1588	5.00156	1.41864	6.05097	3.37265	6.25317	3.32883	6.16029	2.42521	0.119397	0.489191
ENSG00000110435	pyruvate dehydrogenase complex, component X [Source:HGNC Symbol;Acc:21350]	PDHX	protein_coding	2.03917	5.45022	4.52967	5.15173	5.85679	4.27405	5.80397	4.76709	2.42257	0.119599	0.489719
ENSG00000108423	tubulin, delta 1 [Source:HGNC Symbol;Acc:16811]	TUBD1	protein_coding	1.61112	4.50668	4.87479	4.8741	4.65799	3.48323	4.66666	4.34626	2.42054	0.119753	0.490053
ENSG00000055208	TGF-beta activated kinase 1/MAP3K7 binding protein 2 [Source:HGNC Symbol;Acc:17075]	TAB2	protein_coding	-1.94351	6.40595	1.41864	5.06409	5.59619	7.96779	5.52344	7.12603	2.41916	0.11986	0.490188
ENSG00000114115	retinol binding protein 1, cellular [Source:HGNC Symbol;Acc:9919]	RBP1	protein_coding	-1.52174	7.71047	4.19053	9.28358	5.82884	7.73314	5.77195	8.70871	2.41732	0.12	0.490465
ENSG00000139826	abhydrolase domain containing 13 [Source:HGNC Symbol;Acc:20293]	ABHD13	protein_coding	-3.36529	4.7796	1.41864	4.70371	3.00726	7.25963	2.9705	6.47747	2.41554	0.120137	0.490724
ENSG00000068796	kinesin heavy chain member 2A [Source:HGNC Symbol;Acc:6318]	KIF2A	protein_coding	-1.94327	3.3921	2.41864	4.40076	2.19925	4.3443	2.20295	4.37242	2.41324	0.120313	0.491146
ENSG00000116221	mitochondrial ribosomal protein L37 [Source:HGNC Symbol;Acc:14034]	MRPL37	protein_coding	3.55208	5.01293	1.41864	5.00253	5.24837	2.71422	5.17849	4.34166	2.4107	0.120509	0.491393
ENSG00000133687	transmembrane and tetratricopeptide repeat containing 1 [Source:HGNC Symbol;Acc:24099]	TMTC1	protein_coding	-1.21905	2.66707	2.38949	3.45775	1.95993	3.70361	1.97125	3.58427	2.41023	0.120545	0.491393
ENSG00000151414	NIMA-related kinase 7 [Source:HGNC Symbol;Acc:13386]	NEK7	protein_coding	2.82229	4.44717	1.41864	0.353986	5.09785	2.66229	5.02857	1.86943	2.40959	0.120594	0.491393
ENSG00000134202	glutathione S-transferase mu 3 (brain) [Source:HGNC Symbol;Acc:4635]	GSTM3	protein_coding	-1.11795	5.02348	5.57891	6.85973	3.77795	5.63829	3.91664	6.37791	2.40813	0.120707	0.49153
ENSG00000153029	major histocompatibility complex, class I-related [Source:HGNC Symbol;Acc:4975]	MR1	protein_coding	1.29457	4.42382	6.98119	4.61299	4.34323	3.93398	4.65503	4.3151	2.40725	0.120774	0.49153
ENSG00000023318	endoplasmic reticulum protein 44 [Source:HGNC Symbol;Acc:18311]	ERP44	protein_coding	1.45778	7.87905	11.1677	6.70773	7.54446	7.68811	8.32798	7.27223	2.4019	0.121188	0.492621
ENSG00000174231	pre-mRNA processing factor 8 [Source:HGNC Symbol;Acc:17340]	PRPF8	protein_coding	-1.39457	7.57104	4.75135	7.49531	6.83339	9.02979	6.7657	8.44166	2.40188	0.121189	0.492621
ENSG00000112053	solute carrier family 26 (anion exchanger), member 8 [Source:HGNC Symbol;Acc:14468]	SLC26A8	protein_coding	-0.921835	3.67965	5.07799	4.27141	2.63019	4.70593	2.8353	4.49825	2.39688	0.121578	0.4939
ENSG00000136003	iron-sulfur cluster assembly enzyme [Source:HGNC Symbol;Acc:29882]	ISCU	protein_coding	-2.4314	4.86255	1.41864	5.20562	3.71241	6.50714	3.66485	6.00562	2.3923	0.121934	0.495049
ENSG00000168887	chromosome 2 open reading frame 68 [Source:HGNC Symbol;Acc:34353]	C2orf68	protein_coding	1.34027	6.57996	6.80975	7.70004	6.50345	5.75423	6.52249	7.03235	2.39115	0.122024	0.495111
ENSG00000229180		GS1-124K5.11	lincRNA	-1.16565	3.46159	2.64515	4.6209	2.378	4.02367	2.38399	4.3538	2.38972	0.122136	0.495267
ENSG00000136450	serine/arginine-rich splicing factor 1 [Source:HGNC Symbol;Acc:10780]	SRSF1	protein_coding	-2.48895	6.27429	2.0036	4.75487	5.01253	7.89853	4.94991	7.03176	2.38845	0.122234	0.495367
ENSG00000136021	SCY1-like 2 (S. cerevisiae) [Source:HGNC Symbol;Acc:19286]	SCYL2	protein_coding	-3.25058	5.8992	1.41864	7.22093	3.4347	6.65179	3.38937	6.96358	2.38652	0.122386	0.49568
ENSG00000181885	claudin 7 [Source:HGNC Symbol;Acc:2049]	CLDN7	protein_coding	2.09071	7.26383	1.41864	8.34587	6.74604	5.01493	6.6603	7.49882	2.38367	0.122609	0.496107
ENSG00000089335	zinc finger protein 302 [Source:HGNC Symbol;Acc:13848]	ZNF302	protein_coding	1.95413	5.96406	4.1979	3.8082	6.1569	5.16996	6.09437	4.59247	2.38329	0.122639	0.496107
ENSG00000225564		RP11-341A22.2	lincRNA	-1.01975	3.63431	2.65437	4.96304	2.72072	4.12957	2.71483	4.60513	2.37755	0.123091	0.49735
ENSG00000104388	RAB2A, member RAS oncogene family [Source:HGNC Symbol;Acc:9763]	RAB2A	protein_coding	-1.89552	6.45419	1.41864	5.41377	5.61591	7.73305	5.5407	6.9895	2.37644	0.123178	0.49735
ENSG00000115524	splicing factor 3b, subunit 1, 155kDa [Source:HGNC Symbol;Acc:10768]	SF3B1	protein_coding	-1.70452	8.19252	2.74057	9.37643	7.13222	9.36535	7.04613	9.37095	2.37543	0.123257	0.49735
ENSG00000130147	SH3-domain binding protein 4 [Source:HGNC Symbol;Acc:10826]	SH3BP4	protein_coding	-2.657	6.23837	1.41864	7.2073	4.44422	7.88367	4.38319	7.57551	2.37522	0.123274	0.49735
ENSG00000115484	chaperonin containing TCP1, subunit 4 (delta) [Source:HGNC Symbol;Acc:1617]	CCT4	protein_coding	1.83455	7.24521	7.94854	6.45135	7.46773	6.88436	7.50192	6.68163	2.37381	0.123385	0.49735
ENSG00000157107	FCH domain only 2 [Source:HGNC Symbol;Acc:25180]	FCHO2	protein_coding	1.71781	5.55145	9.59979	4.59518	4.73414	5.08935	6.10163	4.84837	2.37374	0.123391	0.49735
ENSG00000152601	muscleblind-like splicing regulator 1 [Source:HGNC Symbol;Acc:6923]	MBNL1	protein_coding	1.49717	7.739	11.7607	7.13713	6.80508	6.90294	8.35615	7.02239	2.37046	0.123651	0.498095
ENSG00000162585	chromosome 1 open reading frame 86 [Source:HGNC Symbol;Acc:26428]	C1orf86	protein_coding	-1.10767	4.00213	4.44278	3.24901	3.22826	5.31273	3.29529	4.62327	2.36872	0.123788	0.498287
ENSG00000074695	lectin, mannose-binding, 1 [Source:HGNC Symbol;Acc:6631]	LMAN1	protein_coding	-1.80639	7.1961	4.87807	7.17562	6.21925	8.28306	6.16846	7.83593	2.36791	0.123853	0.498287
ENSG00000145495	membrane-associated ring finger (C3HC4) 6, E3 ubiquitin protein ligase [Source:HGNC Symbol;Acc:30550]	MARCH6	protein_coding	3.02845	6.56075	2.0036	6.39204	6.98341	3.83344	6.89742	5.68234	2.36705	0.123921	0.498287
ENSG00000137992	dihydrolipoamide branched chain transacylase E2 [Source:HGNC Symbol;Acc:2698]	DBT	protein_coding	2.10198	5.29615	4.40323	6.09528	4.95533	3.46254	4.93123	5.39253	2.36606	0.123999	0.498302
ENSG00000152061	RAB GTPase activating protein 1-like [Source:HGNC Symbol;Acc:24663]	RABGAP1L	protein_coding	-1.41463	7.09765	5.88527	6.81938	6.1929	8.93964	6.17599	8.2435	2.36224	0.124304	0.498913
ENSG00000005889	zinc finger protein, X-linked [Source:HGNC Symbol;Acc:12869]	ZFX	protein_coding	-1.86089	7.06805	1.41864	7.77911	6.13695	7.87509	6.05727	7.82746	2.36175	0.124343	0.498913
ENSG00000140265	zinc finger and SCAN domain containing 29 [Source:HGNC Symbol;Acc:26673]	ZSCAN29	protein_coding	1.26685	4.29135	6.54978	5.01591	3.96322	3.52579	4.24606	4.4329	2.36135	0.124375	0.498913
ENSG00000164332	ubiquitin-like domain containing CTD phosphatase 1 [Source:HGNC Symbol;Acc:28110]	UBLCP1	protein_coding	4.50281	4.422	1.41864	4.28642	4.68843	1.60535	4.62371	3.62597	2.35961	0.124513	0.498933
ENSG00000082898	exportin 1 (CRM1 homolog, yeast) [Source:HGNC Symbol;Acc:12825]	XPO1	protein_coding	-1.70207	6.85464	3.92834	7.77073	6.00083	7.77626	5.93935	7.77341	2.35939	0.124531	0.498933
ENSG00000165646	solute carrier family 18 (vesicular monoamine transporter), member 2 [Source:HGNC Symbol;Acc:10935]	SLC18A2	protein_coding	2.73975	7.18003	11.186	4.91432	6.60184	5.84144	7.89594	5.45989	2.35849	0.124603	0.498933
ENSG00000196878	laminin, beta 3 [Source:HGNC Symbol;Acc:6490]	LAMB3	protein_coding	2.71462	8.03702	1.41864	6.37113	8.27188	6.19339	8.17802	6.28819	2.35646	0.124765	0.499284
ENSG00000048649	remodeling and spacing factor 1 [Source:HGNC Symbol;Acc:18118]	RSF1	protein_coding	-1.75309	6.56209	3.2806	6.85629	5.56208	8.05703	5.50033	7.55493	2.35518	0.124868	0.499397
ENSG00000119720	NRDE-2, necessary for RNA interference, domain containing [Source:HGNC Symbol;Acc:20186]	NRDE2	protein_coding	2.09287	3.97321	3.03688	4.84962	4.11217	2.32516	4.07756	4.04657	2.35105	0.125199	0.499673
ENSG00000214046	small integral membrane protein 7 [Source:HGNC Symbol;Acc:28419]	SMIM7	protein_coding	-1.53966	7.27781	2.0084	7.27061	6.72636	8.42787	6.64239	7.96196	2.34982	0.125297	0.499673
ENSG00000100099	Hermansky-Pudlak syndrome 4 [Source:HGNC Symbol;Acc:15844]	HPS4	protein_coding	-1.95296	4.72225	3.27861	5.86712	3.57441	5.99175	3.561	5.93181	2.34951	0.125322	0.499673
ENSG00000205937	RNA binding protein S1, serine-rich domain [Source:HGNC Symbol;Acc:10080]	RNPS1	protein_coding	-1.37714	6.1114	3.96954	7.12339	5.29132	6.94532	5.24511	7.03587	2.34888	0.125373	0.499673
ENSG00000137962	Rho GTPase activating protein 29 [Source:HGNC Symbol;Acc:30207]	ARHGAP29	protein_coding	-1.65356	5.08792	5.37284	6.30971	3.67053	6.26201	3.79115	6.28728	2.34763	0.125474	0.499673
ENSG00000176946	THAP domain containing 4 [Source:HGNC Symbol;Acc:23187]	THAP4	protein_coding	4.66798	4.59418	1.41864	1.15636	4.93064	1.72913	4.86573	1.45224	2.34739	0.125493	0.499673
ENSG00000162390	acyl-CoA thioesterase 11 [Source:HGNC Symbol;Acc:18156]	ACOT11	protein_coding	-1.26679	4.79832	4.44721	5.31888	3.98235	6.56755	4.00365	6.07575	2.34727	0.125503	0.499673
ENSG00000101144	bone morphogenetic protein 7 [Source:HGNC Symbol;Acc:1074]	BMP7	protein_coding	-0.976838	4.20009	4.17993	4.60891	3.47523	5.33557	3.50716	5.01195	2.34689	0.125533	0.499673
ENSG00000163374	YY1 associated protein 1 [Source:HGNC Symbol;Acc:30935]	YY1AP1	protein_coding	2.90683	3.73127	1.41864	5.02317	3.85261	1.74343	3.80296	4.08631	2.34507	0.12568	0.499961
ENSG00000229117	ribosomal protein L41 [Source:HGNC Symbol;Acc:10354]	RPL41	protein_coding	0.981801	10.7785	9.93237	9.5848	10.8591	10.4757	10.8131	10.0969	2.34322	0.12583	0.500258
ENSG00000115944	cytochrome c oxidase subunit VIIa polypeptide 2 like [Source:HGNC Symbol;Acc:2289]	COX7A2L	protein_coding	2.37516	7.1446	1.41864	7.53654	6.99931	5.05318	6.91236	6.79739	2.34071	0.126032	0.500768
ENSG00000166532	ribosomal modification protein rimK-like family member B [Source:HGNC Symbol;Acc:29228]	RIMKLB	protein_coding	-2.4509	4.19169	1.41864	2.89756	3.23994	5.99025	3.19853	5.06313	2.33747	0.126295	0.501181
ENSG00000183941	histone cluster 2, H4a [Source:HGNC Symbol;Acc:4794]	HIST2H4A	protein_coding	4.50505	5.75352	1.41864	4.29133	6.3878	2.69691	6.30386	3.8022	2.33644	0.126378	0.501181
ENSG00000127824	tubulin, alpha 4a [Source:HGNC Symbol;Acc:12407]	TUBA4A	protein_coding	4.19139	9.55394	1.41864	5.71582	10.0858	6.75356	9.98806	6.29261	2.33561	0.126446	0.501181
ENSG00000126456	interferon regulatory factor 3 [Source:HGNC Symbol;Acc:6118]	IRF3	protein_coding	-1.1341	3.02999	3.48387	4.29136	1.90885	3.43393	1.99	3.93518	2.33505	0.126491	0.501181
ENSG00000115942	origin recognition complex, subunit 2 [Source:HGNC Symbol;Acc:8488]	ORC2	protein_coding	-1.97304	4.59117	1.41864	4.11495	3.81908	6.16275	3.76945	5.34271	2.33406	0.126571	0.501181
ENSG00000196591	histone deacetylase 2 [Source:HGNC Symbol;Acc:4853]	HDAC2	protein_coding	2.11431	5.22033	2.81918	4.60137	5.39417	3.83019	5.32955	4.28013	2.33333	0.126631	0.501181
ENSG00000168952	syntaxin binding protein 6 (amisyn) [Source:HGNC Symbol;Acc:19666]	STXBP6	protein_coding	2.68905	4.85085	9.45206	1.43171	3.31166	3.39899	5.52633	2.66726	2.33297	0.12666	0.501181
ENSG00000101294	histocompatibility (minor) 13 [Source:HGNC Symbol;Acc:16435]	HM13	protein_coding	1.78192	5.9138	4.56676	5.83839	6.04135	4.88028	5.98803	5.46964	2.32743	0.127112	0.502248
ENSG00000049618	AT rich interactive domain 1B (SWI1-like) [Source:HGNC Symbol;Acc:18040]	ARID1B	protein_coding	-1.74176	5.7544	3.22599	5.97393	4.72376	7.10249	4.67866	6.63874	2.32741	0.127113	0.502248
ENSG00000103932	RNA polymerase II associated protein 1 [Source:HGNC Symbol;Acc:24567]	RPAP1	protein_coding	2.32993	4.3166	4.5635	4.7722	4.49807	2.56011	4.49886	4.0372	2.32691	0.127154	0.502248
ENSG00000143393	phosphatidylinositol 4-kinase, catalytic, beta [Source:HGNC Symbol;Acc:8984]	PI4KB	protein_coding	-3.49599	5.65418	1.41864	3.67375	3.80895	7.5441	3.76146	6.64564	2.32331	0.127448	0.502833
ENSG00000105519	calcyphosine [Source:HGNC Symbol;Acc:1487]	CAPS	protein_coding	0.955833	3.76394	6.7551	4.75851	2.82396	3.1665	3.46024	4.15652	2.32326	0.127452	0.502833
ENSG00000187607	Homo sapiens zinc finger protein 286A (ZNF286A), transcript variant 6, mRNA. [Source:RefSeq mRNA;Acc:NM_001288645]	ZNF286A	protein_coding	-2.26148	6.45509	2.32168	7.98412	4.48522	7.26391	4.43198	7.67851	2.31542	0.128097	0.504613
ENSG00000129007	calmodulin-like 4 [Source:HGNC Symbol;Acc:18445]	CALML4	protein_coding	-3.69583	4.08611	1.41864	6.11604	1.60848	5.47109	1.59918	5.82264	2.3139	0.128222	0.504613
ENSG00000159445	thioesterase superfamily member 4 [Source:HGNC Symbol;Acc:17947]	THEM4	protein_coding	-1.63319	4.92568	3.40232	5.24311	4.04775	6.02271	4.02269	5.64776	2.31345	0.128259	0.504613
ENSG00000115828	glutaminyl-peptide cyclotransferase [Source:HGNC Symbol;Acc:9753]	QPCT	protein_coding	-3.95828	4.96616	1.41864	6.12002	2.20235	6.75752	2.17783	6.46443	2.31329	0.128272	0.504613
ENSG00000124357	N-acetylglucosamine kinase [Source:HGNC Symbol;Acc:17174]	NAGK	protein_coding	2.03924	5.10489	2.51625	5.4194	5.0763	3.85371	5.01596	4.89277	2.3132	0.12828	0.504613
ENSG00000205981	DnaJ (Hsp40) homolog, subfamily C, member 19 [Source:HGNC Symbol;Acc:30528]	DNAJC19	protein_coding	-1.94659	5.32141	1.41864	5.58324	4.36687	6.57409	4.309	6.16856	2.30815	0.128697	0.505545
ENSG00000251417		RP11-1348G14.4	lincRNA	-0.898247	4.33584	3.707	5.34997	3.63081	5.11239	3.6309	5.23356	2.30779	0.128727	0.505545
ENSG00000158850	UDP-Gal:betaGlcNAc beta 1,4- galactosyltransferase, polypeptide 3 [Source:HGNC Symbol;Acc:926]	B4GALT3	protein_coding	4.82874	5.35182	1.41864	4.62153	5.8665	2.11051	5.78809	3.81874	2.30759	0.128743	0.505545
ENSG00000156110	adenosine kinase [Source:HGNC Symbol;Acc:257]	ADK	protein_coding	-2.33691	5.39974	1.41864	6.15718	4.16978	6.68716	4.1139	6.44418	2.30611	0.128866	0.50573
ENSG00000173960	UBX domain protein 2A [Source:HGNC Symbol;Acc:27265]	UBXN2A	protein_coding	-1.28143	5.45021	5.10346	5.88745	4.388	6.62897	4.42594	6.30982	2.29634	0.129679	0.508623
ENSG00000123636	bromodomain adjacent to zinc finger domain, 2B [Source:HGNC Symbol;Acc:963]	BAZ2B	protein_coding	-1.10164	7.25359	5.98363	9.03041	6.29228	7.91314	6.27502	8.57605	2.29172	0.130066	0.509844
ENSG00000133884	D4, zinc and double PHD fingers family 2 [Source:HGNC Symbol;Acc:9964]	DPF2	protein_coding	-1.00091	5.09197	5.62965	6.08367	4.10938	6.04803	4.22254	6.06613	2.28957	0.130246	0.510085
ENSG00000101365	isocitrate dehydrogenase 3 (NAD+) beta [Source:HGNC Symbol;Acc:5385]	IDH3B	protein_coding	5.25584	5.4261	1.41864	1.44943	6.18841	1.96579	6.0954	1.71858	2.28917	0.13028	0.510085
ENSG00000011405	phosphatidylinositol-4-phosphate 3-kinase, catalytic subunit type 2 alpha [Source:HGNC Symbol;Acc:8971]	PIK3C2A	protein_coding	-1.60012	4.96289	1.41864	5.84827	4.12501	6.16255	4.07187	6.01175	2.28715	0.130449	0.510451
ENSG00000164366	coiled-coil domain containing 127 [Source:HGNC Symbol;Acc:30520]	CCDC127	protein_coding	1.46122	4.38571	6.0066	4.56341	4.17514	3.89237	4.32334	4.27347	2.28531	0.130604	0.510651
ENSG00000102572	serine/threonine kinase 24 [Source:HGNC Symbol;Acc:11403]	STK24	protein_coding	-2.14172	5.72721	1.41864	5.765	4.81877	7.30434	4.74847	6.72271	2.28328	0.130775	0.510651
ENSG00000139132	FYVE, RhoGEF and PH domain containing 4 [Source:HGNC Symbol;Acc:19125]	FGD4	protein_coding	-1.87648	5.65011	5.74309	6.84093	3.80655	6.76505	3.96322	6.80369	2.28253	0.130838	0.510651
ENSG00000139433	glycolipid transfer protein [Source:HGNC Symbol;Acc:24867]	GLTP	protein_coding	1.28249	7.33468	5.33893	7.28783	7.49906	6.74025	7.42815	7.03985	2.2819	0.130892	0.510651
ENSG00000134882	UBA domain containing 2 [Source:HGNC Symbol;Acc:20486]	UBAC2	protein_coding	2.2718	5.26831	2.08312	4.53549	5.80804	3.88576	5.7328	4.25768	2.28164	0.130913	0.510651
ENSG00000070010	ubiquitin fusion degradation 1 like (yeast) [Source:HGNC Symbol;Acc:12520]	UFD1L	protein_coding	-1.22187	5.9669	4.05555	5.63281	5.38349	7.30814	5.3374	6.69316	2.28112	0.130958	0.510651
ENSG00000183605	sideroflexin 4 [Source:HGNC Symbol;Acc:16088]	SFXN4	protein_coding	4.96491	4.94683	1.41864	5.78805	4.37046	1.25716	4.31278	4.91658	2.27855	0.131175	0.510833
ENSG00000133818	related RAS viral (r-ras) oncogene homolog 2 [Source:HGNC Symbol;Acc:17271]	RRAS2	protein_coding	3.81142	4.81017	1.41864	4.26232	5.08103	2.46417	5.01359	3.68743	2.27797	0.131224	0.510833
ENSG00000213676	activating transcription factor 6 beta [Source:HGNC Symbol;Acc:2349]	ATF6B	protein_coding	-0.958951	4.15497	4.70256	5.1885	3.10391	4.91021	3.20934	5.05569	2.27717	0.131292	0.510833
ENSG00000164251	coagulation factor II (thrombin) receptor-like 1 [Source:HGNC Symbol;Acc:3538]	F2RL1	protein_coding	3.97432	5.29709	1.41864	3.18524	5.55613	2.6707	5.48205	2.95774	2.27696	0.131309	0.510833
ENSG00000008128	cyclin-dependent kinase 11A [Source:HGNC Symbol;Acc:1730]	CDK11A	protein_coding	2.78934	3.22712	1.41864	2.77836	3.66805	1.9638	3.61854	2.46232	2.27137	0.131784	0.512381
ENSG00000003402	CASP8 and FADD-like apoptosis regulator [Source:HGNC Symbol;Acc:1876]	CFLAR	protein_coding	-1.44442	6.52076	2.74057	7.74038	5.53989	7.37898	5.47282	7.57203	2.26814	0.132058	0.512684
ENSG00000099290	family with sequence similarity 21, member A [Source:HGNC Symbol;Acc:23416]	FAM21A	protein_coding	4.99268	5.32428	1.41864	7.46492	3.51081	0.958348	3.45738	6.51949	2.26782	0.132086	0.512684
ENSG00000014824	solute carrier family 30 (zinc transporter), member 9 [Source:HGNC Symbol;Acc:1329]	SLC30A9	protein_coding	2.95658	5.86391	1.41864	4.57024	6.30426	3.69525	6.2208	4.22184	2.26776	0.132091	0.512684
ENSG00000128881	tau tubulin kinase 2 [Source:HGNC Symbol;Acc:19141]	TTBK2	protein_coding	-2.07621	4.66406	2.56595	6.40429	1.79183	4.33025	1.81883	5.73042	2.26545	0.132288	0.512779
ENSG00000130332	LSM7 homolog, U6 small nuclear RNA associated (S. cerevisiae) [Source:HGNC Symbol;Acc:20470]	LSM7	protein_coding	-1.27573	3.99843	2.54297	4.82721	3.07788	4.88903	3.05767	4.85602	2.26537	0.132294	0.512779
ENSG00000156467	ubiquinol-cytochrome c reductase binding protein [Source:HGNC Symbol;Acc:12582]	UQCRB	protein_coding	0.995288	7.43868	11.2127	6.80347	6.52199	7.44121	7.87826	7.15698	2.26372	0.132436	0.512779
ENSG00000169375	SIN3 transcription regulator family member A [Source:HGNC Symbol;Acc:19353]	SIN3A	protein_coding	-1.767	5.82652	4.66277	5.58778	4.68121	7.58746	4.67827	6.85548	2.26334	0.132468	0.512779
ENSG00000053770	adaptor-related protein complex 5, mu 1 subunit [Source:HGNC Symbol;Acc:20192]	AP5M1	protein_coding	5.00388	5.01024	1.41864	6.44754	4.98931	1.39822	4.91789	5.55454	2.26237	0.132551	0.512779
ENSG00000197694	spectrin, alpha, non-erythrocytic 1 [Source:HGNC Symbol;Acc:11273]	SPTAN1	protein_coding	-1.84756	7.36548	3.59815	8.57753	5.76931	8.00081	5.70606	8.31963	2.2621	0.132574	0.512779
ENSG00000055211	glycoprotein integral membrane 1 [Source:HGNC Symbol;Acc:21074]	GINM1	protein_coding	1.73942	6.27678	2.81644	6.71211	6.17439	5.07373	6.09921	6.13487	2.2588	0.132857	0.513575
ENSG00000155660	protein disulfide isomerase family A, member 4 [Source:HGNC Symbol;Acc:30167]	PDIA4	protein_coding	-1.91689	5.31755	1.41864	5.29385	4.42303	6.49528	4.36392	6.01402	2.25573	0.133121	0.514285
ENSG00000070785	eukaryotic translation initiation factor 2B, subunit 3 gamma, 58kDa [Source:HGNC Symbol;Acc:3259]	EIF2B3	protein_coding	-3.29062	5.55102	1.41864	5.39461	3.5713	7.2942	3.52536	6.64129	2.25488	0.133194	0.514285
ENSG00000160471	cytochrome c oxidase subunit VIb polypeptide 2 (testis) [Source:HGNC Symbol;Acc:24380]	COX6B2	protein_coding	-1.03778	4.38057	4.02271	5.02864	3.61164	5.30722	3.6276	5.17622	2.25162	0.133474	0.515072
ENSG00000091640	sperm associated antigen 7 [Source:HGNC Symbol;Acc:11216]	SPAG7	protein_coding	-1.73717	6.30407	2.91177	5.38212	5.49507	7.59065	5.43091	6.87398	2.24693	0.13388	0.51634
ENSG00000109089	cerebellar degeneration-related protein 2-like [Source:HGNC Symbol;Acc:29999]	CDR2L	protein_coding	-3.12989	3.61831	1.41864	5.73688	0.725713	3.40082	0.74563	5.06177	2.24591	0.133968	0.516383
ENSG00000136238	ras-related C3 botulinum toxin substrate 1 (rho family, small GTP binding protein Rac1) [Source:HGNC Symbol;Acc:9801]	RAC1	protein_coding	-1.30767	6.7811	2.0036	7.87246	5.99322	7.68209	5.91559	7.78079	2.24176	0.134328	0.51747
ENSG00000125304	transmembrane 9 superfamily member 2 [Source:HGNC Symbol;Acc:11865]	TM9SF2	protein_coding	1.99294	8.1635	5.11908	7.98596	8.55017	6.94459	8.46393	7.56627	2.24056	0.134432	0.517576
ENSG00000165280	valosin containing protein [Source:HGNC Symbol;Acc:12666]	VCP	protein_coding	2.32793	5.93279	1.41864	5.25992	6.4276	4.74776	6.34448	5.02764	2.23754	0.134695	0.518006
ENSG00000181722	zinc finger and BTB domain containing 20 [Source:HGNC Symbol;Acc:13503]	ZBTB20	protein_coding	-1.61374	5.37573	1.41864	6.44589	4.49156	6.54178	4.43049	6.49429	2.2375	0.134699	0.518006
ENSG00000148950	IMP1 inner mitochondrial membrane peptidase-like (S. cerevisiae) [Source:HGNC Symbol;Acc:26317]	IMMP1L	protein_coding	-1.71969	3.58404	1.41864	3.58303	2.84857	5.06517	2.811	4.48163	2.23514	0.134904	0.518204
ENSG00000166326	tripartite motif containing 44 [Source:HGNC Symbol;Acc:19016]	TRIM44	protein_coding	3.32163	4.66403	1.41864	3.97904	4.99644	2.69936	4.92897	3.47765	2.23514	0.134905	0.518204
ENSG00000182217	histone cluster 2, H4b [Source:HGNC Symbol;Acc:29607]	HIST2H4B	protein_coding	4.35537	5.61716	1.41864	4.29133	6.26181	2.69691	6.17881	3.8022	2.2295	0.135398	0.519514
ENSG00000099797	trans-2,3-enoyl-CoA reductase [Source:HGNC Symbol;Acc:4551]	TECR	protein_coding	-1.54882	5.46583	5.10906	6.85439	4.44471	6.68102	4.47928	6.77044	2.22925	0.13542	0.519514
ENSG00000134709	hook microtubule-tethering protein 1 [Source:HGNC Symbol;Acc:19884]	HOOK1	protein_coding	3.49583	4.67151	3.74057	2.66184	5.01261	2.66005	4.96905	2.65937	2.22834	0.1355	0.519514
ENSG00000101150	tumor protein D52-like 2 [Source:HGNC Symbol;Acc:12007]	TPD52L2	protein_coding	3.83036	4.73843	1.41864	3.62648	5.05203	2.24273	4.985	3.1717	2.2277	0.135556	0.519514
ENSG00000140403	DnaJ (Hsp40) homolog, subfamily A, member 4 [Source:HGNC Symbol;Acc:14885]	DNAJA4	protein_coding	5.29048	5.22991	1.41864	0.353986	5.62743	1.28184	5.55369	0.845895	2.2256	0.13574	0.519762
ENSG00000051108	homocysteine-inducible, endoplasmic reticulum stress-inducible, ubiquitin-like domain member 1 [Source:HGNC Symbol;Acc:13744]	HERPUD1	protein_coding	2.31842	8.22444	3.22599	8.87269	8.43436	6.8914	8.34198	8.19484	2.22519	0.135776	0.519762
ENSG00000139624	ceramide synthase 5 [Source:HGNC Symbol;Acc:23749]	CERS5	protein_coding	-1.49117	5.4197	5.37887	5.87791	4.41861	6.68872	4.4781	6.33567	2.21961	0.136267	0.521347
ENSG00000012963	ubiquitin protein ligase E3 component n-recognin 7 (putative) [Source:HGNC Symbol;Acc:20344]	UBR7	protein_coding	-2.5053	5.83859	1.41864	5.88855	4.51057	7.3473	4.45038	6.78243	2.21657	0.136536	0.52195
ENSG00000106603	cytochrome c oxidase assembly factor 1 homolog (S. cerevisiae) [Source:HGNC Symbol;Acc:21868]	COA1	protein_coding	1.19453	6.44381	10.1282	6.44529	5.65441	6.07829	6.83918	6.27125	2.21597	0.136589	0.52195
ENSG00000149187	CUGBP, Elav-like family member 1 [Source:HGNC Symbol;Acc:2549]	CELF1	protein_coding	1.42659	6.57643	4.16388	6.56662	6.77817	5.62499	6.70263	6.19436	2.21519	0.136659	0.52195
ENSG00000114331	ArfGAP with coiled-coil, ankyrin repeat and PH domains 2 [Source:HGNC Symbol;Acc:16469]	ACAP2	protein_coding	-1.24842	4.7034	2.86754	4.57797	4.16136	5.99378	4.12244	5.46102	2.21325	0.13683	0.522306
ENSG00000088179	protein tyrosine phosphatase, non-receptor type 4 (megakaryocyte) [Source:HGNC Symbol;Acc:9656]	PTPN4	protein_coding	-2.42795	5.9474	1.41864	7.13948	4.56368	6.78182	4.49705	6.97025	2.21096	0.137033	0.522786
ENSG00000131475	vacuolar protein sorting 25 homolog (S. cerevisiae) [Source:HGNC Symbol;Acc:28122]	VPS25	protein_coding	2.67556	6.53826	1.41864	5.85254	6.93103	4.91303	6.84423	5.47575	2.20905	0.137203	0.523103
ENSG00000125954	CHURC1-FNTB readthrough [Source:HGNC Symbol;Acc:42960]	CHURC1-FNTB	protein_coding	-1.91115	5.40223	1.41864	6.67915	4.32817	6.4679	4.27034	6.5755	2.20821	0.137278	0.523103
ENSG00000164074	chromosome 4 open reading frame 29 [Source:HGNC Symbol;Acc:26111]	C4orf29	protein_coding	1.13956	4.17531	5.62106	3.80718	4.19632	3.88759	4.29654	3.84716	2.2068	0.137404	0.523103
ENSG00000182107	transmembrane protein 30B [Source:HGNC Symbol;Acc:27254]	TMEM30B	protein_coding	4.12873	4.07425	1.41864	3.17917	4.5903	1.68787	4.52816	2.70017	2.20652	0.137429	0.523103
ENSG00000132357	caspase recruitment domain family, member 6 [Source:HGNC Symbol;Acc:16394]	CARD6	protein_coding	-1.85208	5.04727	1.74057	5.69848	4.12793	6.01173	4.07655	5.86674	2.20557	0.137513	0.523127
ENSG00000227471	aldo-keto reductase family 1, member B15 [Source:HGNC Symbol;Acc:37281]	AKR1B15	protein_coding	-1.95518	4.66086	1.41864	4.73648	3.86084	6.2841	3.80217	5.72962	2.20268	0.137771	0.523449
ENSG00000158711	ELK4, ETS-domain protein (SRF accessory protein 1) [Source:HGNC Symbol;Acc:3326]	ELK4	protein_coding	1.87317	4.99857	4.02981	6.99211	4.19036	2.91768	4.1812	6.08501	2.20196	0.137835	0.523449
ENSG00000184743	atlastin GTPase 3 [Source:HGNC Symbol;Acc:24526]	ATL3	protein_coding	1.70412	7.39757	2.41503	5.91266	7.64527	6.41467	7.55574	6.17803	2.2013	0.137894	0.523449
ENSG00000147121	KRAB box domain containing 4 [Source:HGNC Symbol;Acc:26007]	KRBOX4	protein_coding	2.22203	4.7124	1.41864	4.90794	5.06979	3.44417	5.00168	4.38765	2.20113	0.13791	0.523449
ENSG00000071082	ribosomal protein L31 [Source:HGNC Symbol;Acc:10334]	RPL31	protein_coding	0.921067	9.20437	8.59357	8.47611	9.23574	8.86296	9.2015	8.68178	2.18968	0.138938	0.527054
ENSG00000203668	choroideremia-like (Rab escort protein 2) [Source:HGNC Symbol;Acc:1941]	CHML	protein_coding	2.38328	5.14669	1.41864	1.98036	5.40009	3.86967	5.32765	3.16487	2.18798	0.139092	0.527336
ENSG00000008710	polycystic kidney disease 1 (autosomal dominant) [Source:HGNC Symbol;Acc:9008]	PKD1	protein_coding	-1.26872	3.86315	1.41864	4.9827	3.04259	4.694	3.00261	4.84421	2.1817	0.13966	0.528962
ENSG00000128654	metaxin 2 [Source:HGNC Symbol;Acc:7506]	MTX2	protein_coding	-2.2523	4.81276	1.41864	3.15772	3.99455	6.66251	3.94119	5.81125	2.1813	0.139697	0.528962
ENSG00000155090	Kruppel-like factor 10 [Source:HGNC Symbol;Acc:11810]	KLF10	protein_coding	-2.05294	6.53355	1.41864	4.298	6.08282	8.2521	6.00196	7.3403	2.18063	0.139757	0.528962
ENSG00000198498	translation machinery associated 16 homolog (S. cerevisiae) [Source:HGNC Symbol;Acc:25638]	TMA16	protein_coding	-1.97762	3.885	1.41864	1.02421	3.07618	5.28108	3.03659	4.35908	2.17739	0.140052	0.529779
ENSG00000112306	ribosomal protein S12 [Source:HGNC Symbol;Acc:10385]	RPS12	protein_coding	1.20153	9.16569	7.8449	8.3057	9.23204	8.51673	9.17278	8.41474	2.17398	0.140362	0.530653
ENSG00000114302	protein kinase, cAMP-dependent, regulatory, type II, alpha [Source:HGNC Symbol;Acc:9391]	PRKAR2A	protein_coding	1.69565	5.54542	4.12903	5.02418	5.88537	4.6504	5.82787	4.83978	2.17038	0.140691	0.531597
ENSG00000129103	sulfatase modifying factor 2 [Source:HGNC Symbol;Acc:20415]	SUMF2	protein_coding	-1.47146	6.66911	1.41864	7.19507	5.82332	7.40767	5.74659	7.30405	2.16791	0.140917	0.531607
ENSG00000183520	UTP11-like, U3 small nucleolar ribonucleoprotein, (yeast) [Source:HGNC Symbol;Acc:24329]	UTP11L	protein_coding	1.29735	6.50556	3.17353	4.66997	6.72016	6.00227	6.64044	5.49905	2.16791	0.140918	0.531607
ENSG00000161970	ribosomal protein L26 [Source:HGNC Symbol;Acc:10327]	RPL26	protein_coding	1.09926	8.25105	8.60866	7.12765	8.32677	8.02586	8.34615	7.64003	2.16776	0.140932	0.531607
ENSG00000102144	phosphoglycerate kinase 1 [Source:HGNC Symbol;Acc:8896]	PGK1	protein_coding	1.71363	8.90024	1.41864	8.72725	9.24399	7.90822	9.14684	8.37832	2.16421	0.141258	0.532387
ENSG00000166483	WEE1 G2 checkpoint kinase [Source:HGNC Symbol;Acc:12761]	WEE1	protein_coding	2.14948	6.98115	2.41864	6.60511	7.30229	5.91749	7.21285	6.32033	2.16377	0.141297	0.532387
ENSG00000144909	oxysterol binding protein-like 11 [Source:HGNC Symbol;Acc:16397]	OSBPL11	protein_coding	-2.85791	4.55545	1.41864	5.60773	2.81772	5.68787	2.78298	5.64741	2.16258	0.141407	0.532499
ENSG00000163249	cyclin Y-like 1 [Source:HGNC Symbol;Acc:26868]	CCNYL1	protein_coding	-2.27664	3.46131	1.41864	3.89229	2.22263	4.90012	2.19951	4.47168	2.15901	0.141736	0.533439
ENSG00000174574	akirin 1 [Source:HGNC Symbol;Acc:25744]	AKIRIN1	protein_coding	-1.91845	3.59739	1.41864	4.1333	2.5648	4.99646	2.53487	4.62367	2.15588	0.142025	0.533979
ENSG00000204790	COBW domain containing 6 [Source:HGNC Symbol;Acc:31978]	CBWD6	protein_coding	-1.19468	7.46299	3.15849	8.09225	6.83861	8.55384	6.75711	8.34073	2.15567	0.142045	0.533979
ENSG00000165637	voltage-dependent anion channel 2 [Source:HGNC Symbol;Acc:12672]	VDAC2	protein_coding	1.62081	8.02105	6.68543	7.97633	8.09951	7.28058	8.04131	7.67322	2.15448	0.142155	0.533979
ENSG00000106400	zinc finger, HIT-type containing 1 [Source:HGNC Symbol;Acc:21688]	ZNHIT1	protein_coding	-1.38069	4.39828	3.0036	5.19406	3.40987	5.09766	3.3934	5.14742	2.15363	0.142233	0.533979
ENSG00000162607	ubiquitin specific peptidase 1 [Source:HGNC Symbol;Acc:12607]	USP1	protein_coding	-1.94604	5.95758	1.41864	3.03642	5.26274	7.2191	5.18729	6.29749	2.15315	0.142278	0.533979
ENSG00000114023	family with sequence similarity 162, member A [Source:HGNC Symbol;Acc:17865]	FAM162A	protein_coding	1.95551	6.52179	1.41864	5.94238	6.81679	5.23242	6.73024	5.62878	2.15229	0.142357	0.533979
ENSG00000059573	aldehyde dehydrogenase 18 family, member A1 [Source:HGNC Symbol;Acc:9722]	ALDH18A1	protein_coding	-2.74618	5.39401	3.0036	2.90975	3.29012	7.42763	3.277	6.52041	2.14992	0.142577	0.534506
ENSG00000189060	H1 histone family, member 0 [Source:HGNC Symbol;Acc:4714]	H1F0	protein_coding	3.33016	4.76834	1.41864	5.18583	4.49641	2.40543	4.43527	4.42438	2.14594	0.142947	0.535593
ENSG00000082258	cyclin T2 [Source:HGNC Symbol;Acc:1600]	CCNT2	protein_coding	3.47143	5.10589	2.0036	3.46628	5.6844	2.78053	5.61006	3.15842	2.14462	0.143071	0.535716
ENSG00000164022	aminoacyl tRNA synthetase complex-interacting multifunctional protein 1 [Source:HGNC Symbol;Acc:10648]	AIMP1	protein_coding	2.10004	6.0249	1.41864	6.80061	5.77734	4.38275	5.70241	6.0242	2.14329	0.143195	0.535716
ENSG00000196096		AC079610.2	lincRNA	-1.44012	2.90242	1.41864	4.07964	1.85899	3.71924	1.84351	3.91023	2.14249	0.143269	0.535716
ENSG00000101109	serine/threonine kinase 4 [Source:HGNC Symbol;Acc:11408]	STK4	protein_coding	1.21996	5.87341	5.93245	5.11443	5.99066	5.48349	5.98634	5.30531	2.14102	0.143407	0.535716
ENSG00000166685	component of oligomeric golgi complex 1 [Source:HGNC Symbol;Acc:6545]	COG1	protein_coding	1.13866	4.81127	7.31927	4.58756	4.56014	4.79516	4.93282	4.69307	2.13956	0.143543	0.535716
ENSG00000104946	TBC1 domain family, member 17 [Source:HGNC Symbol;Acc:25699]	TBC1D17	protein_coding	-1.00713	3.2832	3.92834	4.01274	2.37436	4.21688	2.45995	4.11647	2.13854	0.143638	0.535716
ENSG00000169402	radial spoke head 10 homolog B2 (Chlamydomonas) [Source:HGNC Symbol;Acc:34385]	RSPH10B2	protein_coding	-1.53952	3.59999	6.15552	4.95412	1.43607	4.19213	2.29433	4.61674	2.13854	0.143638	0.535716
ENSG00000071994	programmed cell death 2 [Source:HGNC Symbol;Acc:8762]	PDCD2	protein_coding	3.34897	5.29758	1.41864	6.75648	5.32731	2.74828	5.25718	5.81014	2.13742	0.143744	0.535716
ENSG00000138801	3'-phosphoadenosine 5'-phosphosulfate synthase 1 [Source:HGNC Symbol;Acc:8603]	PAPSS1	protein_coding	-2.76201	6.49468	1.41864	7.03016	4.75606	7.94363	4.69594	7.55014	2.13717	0.143767	0.535716
ENSG00000012061	excision repair cross-complementing rodent repair deficiency, complementation group 1 (includes overlapping antisense sequence) [Source:HGNC Symbol;Acc:3433]	ERCC1	protein_coding	2.50766	5.88684	5.26112	6.51814	5.24822	3.5073	5.24717	5.73935	2.13665	0.143816	0.535716
ENSG00000268802		CTD-2587H19.1	lincRNA	-0.926931	3.51772	4.03923	4.50713	2.40418	4.00327	2.5002	4.27814	2.13618	0.143859	0.535716
ENSG00000134291	transmembrane protein 106C [Source:HGNC Symbol;Acc:28775]	TMEM106C	protein_coding	4.79808	5.87112	1.41864	5.87904	6.06436	2.35724	5.98657	5.08822	2.13471	0.143998	0.535935
ENSG00000215252	golgin A8 family, member B [Source:HGNC Symbol;Acc:31973]	GOLGA8B	protein_coding	1.99779	5.45887	7.17139	3.58137	5.5761	5.14911	5.72184	4.57018	2.1322	0.144234	0.535993
ENSG00000136144	regulator of chromosome condensation (RCC1) and BTB (POZ) domain containing protein 1 [Source:HGNC Symbol;Acc:18243]	RCBTB1	protein_coding	4.07113	4.41775	1.41864	5.34702	4.39822	1.65251	4.33748	4.36562	2.13204	0.144249	0.535993
ENSG00000116679	influenza virus NS1A binding protein [Source:HGNC Symbol;Acc:16951]	IVNS1ABP	protein_coding	2.36677	5.877	5.91049	4.52633	6.32386	4.76374	6.30154	4.65288	2.13192	0.14426	0.535993
ENSG00000096063	SRSF protein kinase 1 [Source:HGNC Symbol;Acc:11305]	SRPK1	protein_coding	2.787	6.99202	1.41864	5.23613	7.37773	5.10057	7.28777	5.17191	2.13114	0.144334	0.535993
ENSG00000115548	lysine (K)-specific demethylase 3A [Source:HGNC Symbol;Acc:20815]	KDM3A	protein_coding	-2.66054	4.90443	3.0036	6.4395	2.91097	6.0299	2.91084	6.2474	2.13008	0.144433	0.536065
ENSG00000182196	ADP-ribosylation-like factor 6 interacting protein 4 [Source:HGNC Symbol;Acc:18076]	ARL6IP4	protein_coding	3.01809	5.02214	1.41864	5.67548	5.40426	2.96479	5.33191	4.91485	2.12922	0.144514	0.53607
ENSG00000269842	microRNA 519a-2 [Source:HGNC Symbol;Acc:32132]	MIR519A2	lincRNA	-0.888985	4.27843	4.94909	4.89944	3.34316	5.10462	3.45254	5.00275	2.12776	0.144652	0.536285
ENSG00000140105	tryptophanyl-tRNA synthetase [Source:HGNC Symbol;Acc:12729]	WARS	protein_coding	3.28455	5.81535	1.41864	5.25955	6.1337	3.56298	6.05464	4.68941	2.1215	0.145244	0.538183
ENSG00000114209	programmed cell death 10 [Source:HGNC Symbol;Acc:8761]	PDCD10	protein_coding	-1.92437	6.34697	1.41864	7.35614	4.79668	7.26288	4.733	7.31104	2.12026	0.145362	0.538322
ENSG00000120800	UTP20, small subunit (SSU) processome component, homolog (yeast) [Source:HGNC Symbol;Acc:17897]	UTP20	protein_coding	2.90947	5.58467	2.0036	4.65222	5.79244	3.67989	5.71682	4.28162	2.11905	0.145476	0.538378
ENSG00000101972	stromal antigen 2 [Source:HGNC Symbol;Acc:11355]	STAG2	protein_coding	1.53648	6.40004	3.65283	7.44517	6.02946	4.98676	5.9633	6.71677	2.11841	0.145538	0.538378
ENSG00000147874	HAUS augmin-like complex, subunit 6 [Source:HGNC Symbol;Acc:25948]	HAUS6	protein_coding	-2.05904	3.05003	2.0036	4.85919	1.58742	3.9615	1.5975	4.47053	2.11611	0.145756	0.538854
ENSG00000141232	transducer of ERBB2, 1 [Source:HGNC Symbol;Acc:11979]	TOB1	protein_coding	-2.31468	8.26901	2.0036	8.78886	7.3259	9.65109	7.23744	9.28306	2.11407	0.145951	0.538854
ENSG00000093183	SEC22 vesicle trafficking protein homolog C (S. cerevisiae) [Source:HGNC Symbol;Acc:16828]	SEC22C	protein_coding	2.22058	6.26432	2.0036	5.77536	6.50048	5.15368	6.41758	5.50388	2.11406	0.145951	0.538854
ENSG00000171853	trafficking protein particle complex 12 [Source:HGNC Symbol;Acc:24284]	TRAPPC12	protein_coding	-1.6632	3.32893	3.74057	4.15778	2.08728	4.7146	2.17857	4.46482	2.11368	0.145988	0.538854
ENSG00000167112	TruB pseudouridine (psi) synthase family member 2 [Source:HGNC Symbol;Acc:17170]	TRUB2	protein_coding	4.09291	3.74531	1.41864	1.83216	4.20227	1.53543	4.14739	1.69512	2.11211	0.146138	0.538867
ENSG00000090612	zinc finger protein 268 [Source:HGNC Symbol;Acc:13061]	ZNF268	protein_coding	-3.45682	5.51946	1.41864	5.87082	3.7235	7.48685	3.6753	6.89439	2.11195	0.146153	0.538867
ENSG00000178202	KDEL (Lys-Asp-Glu-Leu) containing 2 [Source:HGNC Symbol;Acc:28496]	KDELC2	protein_coding	-0.866364	4.40943	5.93434	4.86575	3.39513	5.64651	3.64373	5.29947	2.11095	0.146248	0.538924
ENSG00000204427	abhydrolase domain containing 16A [Source:HGNC Symbol;Acc:13921]	ABHD16A	protein_coding	3.0598	3.38834	1.41864	0.558367	3.9559	1.69196	3.90436	1.19137	2.10823	0.146509	0.539571
ENSG00000128731	HECT and RLD domain containing E3 ubiquitin protein ligase 2 [Source:HGNC Symbol;Acc:4868]	HERC2	protein_coding	-1.1765	4.30798	4.24443	3.55795	3.44687	6.28915	3.48456	5.46547	2.10743	0.146585	0.539571
ENSG00000257950	P2RX5-TAX1BP3 readthrough (NMD candidate) [Source:HGNC Symbol;Acc:49191]	P2RX5-TAX1BP3	protein_coding	-0.964717	4.78364	5.20941	6.201	3.77537	5.47613	3.86965	5.88095	2.10586	0.146736	0.539831
ENSG00000135378	proline rich Gla (G-carboxyglutamic acid) 4 (transmembrane) [Source:HGNC Symbol;Acc:30799]	PRRG4	protein_coding	-1.4235	4.1981	3.47001	5.19253	3.32892	5.2377	3.33132	5.21444	2.10451	0.146865	0.540009
ENSG00000109606	DEAH (Asp-Glu-Ala-His) box helicase 15 [Source:HGNC Symbol;Acc:2738]	DHX15	protein_coding	-1.78994	7.11879	3.37655	6.65761	6.31337	8.40435	6.23933	7.77743	2.10201	0.147106	0.540542
ENSG00000188559	Ral GTPase activating protein, alpha subunit 2 (catalytic) [Source:HGNC Symbol;Acc:16207]	RALGAPA2	protein_coding	-1.90158	6.35424	3.41864	7.88256	4.84519	7.13241	4.79997	7.56901	2.10076	0.147226	0.540542
ENSG00000141527	caspase recruitment domain family, member 14 [Source:HGNC Symbol;Acc:16446]	CARD14	protein_coding	-0.810856	3.65251	4.07055	4.25694	2.86889	4.52775	2.93179	4.39805	2.0999	0.147309	0.540542
ENSG00000147586	mitochondrial ribosomal protein S28 [Source:HGNC Symbol;Acc:14513]	MRPS28	protein_coding	2.55089	4.78747	2.0084	4.35294	5.20695	3.35294	5.13892	3.95476	2.09965	0.147333	0.540542
ENSG00000162086	zinc finger protein 75a [Source:HGNC Symbol;Acc:13146]	ZNF75A	protein_coding	3.33177	5.37723	4.26764	6.59322	5.00538	2.90562	4.97505	5.72234	2.09769	0.147522	0.540898
ENSG00000148120	chromosome 9 open reading frame 3 [Source:HGNC Symbol;Acc:1361]	C9orf3	protein_coding	1.79446	6.50469	3.56432	6.40618	6.82633	5.18867	6.747	5.96994	2.09697	0.147591	0.540898
ENSG00000120158	RNA terminal phosphate cyclase-like 1 [Source:HGNC Symbol;Acc:17687]	RCL1	protein_coding	5.08766	5.10541	1.41864	4.15464	5.49383	1.88407	5.42103	3.45043	2.09562	0.147722	0.541081
ENSG00000213965	nudix (nucleoside diphosphate linked moiety X)-type motif 19 [Source:HGNC Symbol;Acc:32036]	NUDT19	protein_coding	-1.6176	6.65308	4.47262	6.45588	5.76529	8.3895	5.71792	7.7066	2.09231	0.148042	0.541959
ENSG00000152749	G protein-coupled receptor 180 [Source:HGNC Symbol;Acc:28899]	GPR180	protein_coding	-1.95684	4.87652	1.41864	1.99194	4.01612	6.65299	3.96272	5.73916	2.08769	0.14849	0.543302
ENSG00000135926	transmembrane BAX inhibitor motif containing 1 [Source:HGNC Symbol;Acc:23410]	TMBIM1	protein_coding	2.25229	7.81465	3.64977	7.43953	8.03527	6.3821	7.94614	7.01284	2.08536	0.148717	0.543586
ENSG00000166794	peptidylprolyl isomerase B (cyclophilin B) [Source:HGNC Symbol;Acc:9255]	PPIB	protein_coding	-1.25638	8.52762	3.1778	9.00599	7.78015	9.10639	7.69107	9.05715	2.08523	0.14873	0.543586
ENSG00000146242	trophoblast glycoprotein [Source:HGNC Symbol;Acc:12004]	TPBG	protein_coding	-2.53647	4.19045	1.41864	5.83708	2.71083	5.35945	2.6788	5.61729	2.08323	0.148924	0.543709
ENSG00000130813	chromosome 19 open reading frame 66 [Source:HGNC Symbol;Acc:25649]	C19orf66	protein_coding	-0.957712	4.89297	4.66353	6.35791	3.77128	5.39538	3.81927	5.96013	2.08257	0.148989	0.543709
ENSG00000104774	mannosidase, alpha, class 2B, member 1 [Source:HGNC Symbol;Acc:6826]	MAN2B1	protein_coding	2.27716	3.86052	6.34938	1.80077	3.79122	2.8467	4.05598	2.33531	2.08239	0.149007	0.543709
ENSG00000164096	chromosome 4 open reading frame 3 [Source:HGNC Symbol;Acc:19225]	C4orf3	protein_coding	-1.74878	6.43929	1.41864	5.68806	5.71226	8.13373	5.63746	7.3765	2.08145	0.149099	0.543747
ENSG00000010404	iduronate 2-sulfatase [Source:HGNC Symbol;Acc:5389]	IDS	protein_coding	1.21748	7.51401	7.38846	6.52163	7.82787	7.60444	7.80278	7.15479	2.07969	0.14927	0.543896
ENSG00000069974	RAB27A, member RAS oncogene family [Source:HGNC Symbol;Acc:9766]	RAB27A	protein_coding	1.44719	6.01678	4.01915	6.20778	6.34199	5.25627	6.27293	5.80603	2.07937	0.149301	0.543896
ENSG00000186184	polymerase (RNA) I polypeptide D, 16kDa [Source:HGNC Symbol;Acc:20422]	POLR1D	protein_coding	2.37163	7.25532	1.41864	4.81998	7.57674	5.91775	7.48641	5.43713	2.07851	0.149386	0.543907
ENSG00000119632	interferon, alpha-inducible protein 27-like 2 [Source:HGNC Symbol;Acc:19753]	IFI27L2	protein_coding	-2.16912	3.75286	7.22599	4.25503	0.903339	4.78104	2.79869	4.52441	2.07492	0.149738	0.544892
ENSG00000009950	MLX interacting protein-like [Source:HGNC Symbol;Acc:12744]	MLXIPL	protein_coding	-1.07379	4.63597	4.59974	4.42848	3.89431	5.67689	3.9319	5.18714	2.07279	0.149947	0.545233
ENSG00000173821	ring finger protein 213 [Source:HGNC Symbol;Acc:14539]	RNF213	protein_coding	-1.20198	8.13595	4.81918	8.51827	7.48181	8.98573	7.40492	8.77173	2.07231	0.149994	0.545233
ENSG00000158411	MIT, microtubule interacting and transport, domain containing 1 [Source:HGNC Symbol;Acc:25207]	MITD1	protein_coding	-1.15145	5.66864	6.44809	6.88873	4.51782	6.66721	4.69635	6.77916	2.06936	0.150285	0.545651
ENSG00000135821	glutamate-ammonia ligase [Source:HGNC Symbol;Acc:4341]	GLUL	protein_coding	2.65329	8.31167	3.0036	7.28191	8.59283	6.3901	8.49925	6.93349	2.0685	0.150369	0.545651
ENSG00000107758	protein phosphatase 3, catalytic subunit, beta isozyme [Source:HGNC Symbol;Acc:9315]	PPP3CB	protein_coding	3.51018	5.26375	1.41864	3.38866	5.58852	2.48646	5.51244	3.00659	2.06846	0.150373	0.545651
ENSG00000163633	chromosome 4 open reading frame 36 [Source:HGNC Symbol;Acc:28386]	C4orf36	protein_coding	-1.10613	5.2044	4.99818	5.85073	4.47412	6.45021	4.50033	6.17076	2.06725	0.150493	0.545651
ENSG00000028839	TBP-like 1 [Source:HGNC Symbol;Acc:11589]	TBPL1	protein_coding	3.39487	6.28278	1.41864	4.98019	6.72855	3.94122	6.64389	4.60281	2.0667	0.150547	0.545651
ENSG00000099204	actin binding LIM protein 1 [Source:HGNC Symbol;Acc:78]	ABLIM1	protein_coding	-1.80239	6.16931	1.41864	7.04779	4.95429	7.12698	4.88325	7.08852	2.06603	0.150613	0.545651
ENSG00000108179	peptidylprolyl isomerase F [Source:HGNC Symbol;Acc:9259]	PPIF	protein_coding	-3.05763	5.42565	1.41864	0.353986	3.8297	7.72195	3.77747	6.59423	2.06537	0.150679	0.545651
ENSG00000014914	myotubularin related protein 11 [Source:HGNC Symbol;Acc:24307]	MTMR11	protein_coding	-2.48515	5.12326	1.41864	2.20725	3.88966	6.78624	3.83863	5.83251	2.06396	0.150818	0.54575
ENSG00000153187	heterogeneous nuclear ribonucleoprotein U (scaffold attachment factor A) [Source:HGNC Symbol;Acc:5048]	HNRNPU	protein_coding	-1.31096	8.54523	1.41864	8.28488	7.98662	9.76085	7.89426	9.2042	2.06344	0.150869	0.54575
ENSG00000163468	chaperonin containing TCP1, subunit 3 (gamma) [Source:HGNC Symbol;Acc:1616]	CCT3	protein_coding	-1.23653	8.33798	5.98819	8.49172	7.56349	9.46652	7.50273	9.05858	2.06209	0.151003	0.545939
ENSG00000223865	major histocompatibility complex, class II, DP beta 1 [Source:HGNC Symbol;Acc:4940]	HLA-DPB1	protein_coding	-1.98502	2.64602	1.41864	3.46239	1.69566	3.89349	1.68408	3.6767	2.05783	0.151426	0.547173
ENSG00000215472	RPL17-C18orf32 readthrough [Source:HGNC Symbol;Acc:44661]	RPL17-C18orf32	protein_coding	1.38141	7.73811	4.33033	6.6352	7.894	7.10947	7.80879	6.89032	2.05654	0.151554	0.547208
ENSG00000138413	isocitrate dehydrogenase 1 (NADP+), soluble [Source:HGNC Symbol;Acc:5382]	IDH1	protein_coding	-2.11212	6.48335	1.41864	7.48514	5.33502	7.81685	5.26447	7.658	2.05596	0.151612	0.547208
ENSG00000165102	heparan-alpha-glucosaminide N-acetyltransferase [Source:HGNC Symbol;Acc:26527]	HGSNAT	protein_coding	-1.68926	5.69257	2.63587	6.61066	4.5338	6.87034	4.48334	6.74394	2.05527	0.15168	0.547208
ENSG00000058262	Sec61 alpha 1 subunit (S. cerevisiae) [Source:HGNC Symbol;Acc:18276]	SEC61A1	protein_coding	2.60952	5.46218	2.41864	5.44572	5.49575	3.22826	5.4265	4.8366	2.05182	0.152024	0.548155
ENSG00000126067	proteasome (prosome, macropain) subunit, beta type, 2 [Source:HGNC Symbol;Acc:9539]	PSMB2	protein_coding	-1.50223	7.31667	2.0036	7.78842	6.68503	8.46465	6.60149	8.16673	2.04581	0.152625	0.549802
ENSG00000163820	FYVE and coiled-coil domain containing 1 [Source:HGNC Symbol;Acc:14673]	FYCO1	protein_coding	3.52295	5.77524	1.41864	7.03907	5.73703	3.0352	5.66134	6.14197	2.04527	0.15268	0.549802
ENSG00000181924	cytochrome c oxidase assembly factor 4 homolog (S. cerevisiae) [Source:HGNC Symbol;Acc:24604]	COA4	protein_coding	2.5456	4.78735	1.41864	5.30825	4.80413	3.21251	4.7407	4.62427	2.0448	0.152727	0.549802
ENSG00000246067	RAB30 antisense RNA 1 (head to head) [Source:HGNC Symbol;Acc:48672]	RAB30-AS1	lincRNA	2.25944	3.68706	1.41864	2.00458	3.93277	2.72068	3.88212	2.39889	2.04222	0.152986	0.549967
ENSG00000148840	peroxisome proliferator-activated receptor gamma, coactivator-related 1 [Source:HGNC Symbol;Acc:30025]	PPRC1	protein_coding	2.75485	3.19536	5.91049	2.83007	2.97485	2.04429	3.29758	2.52838	2.04103	0.153106	0.549967
ENSG00000105705	SURP and G patch domain containing 1 [Source:HGNC Symbol;Acc:18643]	SUGP1	protein_coding	2.6489	3.17242	5.51245	3.1728	3.10815	1.79784	3.32063	2.71603	2.04059	0.15315	0.549967
ENSG00000088832	FK506 binding protein 1A, 12kDa [Source:HGNC Symbol;Acc:3711]	FKBP1A	protein_coding	1.49794	8.72117	1.41864	8.29081	8.83589	7.73566	8.74046	8.03908	2.04026	0.153184	0.549967
ENSG00000083444	procollagen-lysine, 2-oxoglutarate 5-dioxygenase 1 [Source:HGNC Symbol;Acc:9081]	PLOD1	protein_coding	2.16351	5.21322	3.54957	6.48416	4.41001	2.71618	4.37921	5.64513	2.03875	0.153336	0.549967
ENSG00000150459	Sin3A-associated protein, 18kDa [Source:HGNC Symbol;Acc:10530]	SAP18	protein_coding	-1.27626	6.88544	1.41864	7.65934	6.10074	7.85156	6.02135	7.75785	2.03788	0.153423	0.549967
ENSG00000196187	transmembrane protein 63A [Source:HGNC Symbol;Acc:29118]	TMEM63A	protein_coding	-2.17114	5.30509	1.41864	7.15923	2.53145	4.65804	2.50227	6.38942	2.03694	0.153518	0.549967
ENSG00000092330	TERF1 (TRF1)-interacting nuclear factor 2 [Source:HGNC Symbol;Acc:11824]	TINF2	protein_coding	1.17441	5.03852	5.66771	4.22741	5.10483	4.68602	5.13718	4.4677	2.03658	0.153555	0.549967
ENSG00000175197	DNA-damage-inducible transcript 3 [Source:HGNC Symbol;Acc:2726]	DDIT3	protein_coding	3.94133	6.54906	2.0036	5.29833	6.81441	3.29914	6.73055	4.73502	2.03576	0.153638	0.549967
ENSG00000154174	translocase of outer mitochondrial membrane 70 homolog A (S. cerevisiae) [Source:HGNC Symbol;Acc:11985]	TOMM70A	protein_coding	-2.24175	5.78197	1.41864	5.01484	4.76696	7.44299	4.70408	6.69209	2.03558	0.153656	0.549967
ENSG00000111300	N(alpha)-acetyltransferase 25, NatB auxiliary subunit [Source:HGNC Symbol;Acc:25783]	NAA25	protein_coding	1.47998	6.68303	4.32457	5.99919	7.11586	6.03008	7.03863	6.01443	2.03478	0.153736	0.549967
ENSG00000027001	mitochondrial intermediate peptidase [Source:HGNC Symbol;Acc:7104]	MIPEP	protein_coding	-2.89907	2.33934	1.41864	4.13917	0.647472	3.38338	0.670514	3.80552	2.03457	0.153758	0.549967
ENSG00000109180	OCIA domain containing 1 [Source:HGNC Symbol;Acc:16074]	OCIAD1	protein_coding	1.37233	7.13112	8.50414	6.80543	7.42467	6.70942	7.52438	6.75827	2.03045	0.154175	0.551164
ENSG00000204389	heat shock 70kDa protein 1A [Source:HGNC Symbol;Acc:5232]	HSPA1A	protein_coding	-2.19169	4.27768	1.41864	4.20307	3.5643	5.9495	3.51894	5.28754	2.02871	0.154352	0.551319
ENSG00000182149	increased sodium tolerance 1 homolog (yeast) [Source:HGNC Symbol;Acc:28977]	IST1	protein_coding	2.23459	5.9643	1.41864	5.79907	6.3464	4.4286	6.26117	5.28712	2.02841	0.154382	0.551319
ENSG00000189350	family with sequence similarity 179, member A [Source:HGNC Symbol;Acc:33715]	FAM179A	protein_coding	-1.22204	3.0036	3.59337	4.05991	1.78351	3.63914	1.88877	3.85716	2.02654	0.154572	0.551703
ENSG00000113360	drosha, ribonuclease type III [Source:HGNC Symbol;Acc:17904]	DROSHA	protein_coding	-2.73407	5.76317	1.41864	4.97811	4.60283	7.55374	4.54081	6.7886	2.02304	0.154928	0.552481
ENSG00000174748	ribosomal protein L15 [Source:HGNC Symbol;Acc:10306]	RPL15	protein_coding	1.03683	10.9258	5.32697	10.4255	11.0574	10.6589	10.9606	10.5467	2.02278	0.154955	0.552481
ENSG00000062485	citrate synthase [Source:HGNC Symbol;Acc:2422]	CS	protein_coding	1.5304	6.4165	1.41864	5.0589	6.74236	5.68675	6.65699	5.41018	2.02137	0.155099	0.552539
ENSG00000233137		RP11-220I1.1	lincRNA	1.86467	6.74739	7.09107	4.07715	6.83976	6.4185	6.85509	5.67817	2.02101	0.155136	0.552539
ENSG00000114098	armadillo repeat containing 8 [Source:HGNC Symbol;Acc:24999]	ARMC8	protein_coding	-1.48903	6.402	1.99879	7.17925	5.56964	7.49714	5.49853	7.34828	2.01916	0.155325	0.552917
ENSG00000115750	TATA box binding protein (TBP)-associated factor, RNA polymerase I, B, 63kDa [Source:HGNC Symbol;Acc:11533]	TAF1B	protein_coding	3.23152	5.31839	2.41864	6.58182	5.27879	2.55002	5.21435	5.70652	2.01529	0.155721	0.554034
ENSG00000141385	AFG3-like AAA ATPase 2 [Source:HGNC Symbol;Acc:315]	AFG3L2	protein_coding	3.32801	4.37385	1.41864	4.98408	4.46628	2.35528	4.40934	4.14092	2.01364	0.155891	0.554342
ENSG00000198478	SH3 domain binding glutamic acid-rich protein like 2 [Source:HGNC Symbol;Acc:15567]	SH3BGRL2	protein_coding	-2.50543	5.59999	2.0036	5.73956	4.59814	7.68548	4.54016	6.99327	2.01165	0.156095	0.554775
ENSG00000108946	protein kinase, cAMP-dependent, regulatory, type I, alpha [Source:HGNC Symbol;Acc:9388]	PRKAR1A	protein_coding	-1.77292	6.21818	2.0036	5.88527	5.28443	7.72372	5.21756	7.06693	2.00994	0.156271	0.555107
ENSG00000205572	small EDRK-rich factor 1B (centromeric) [Source:HGNC Symbol;Acc:10756]	SERF1B	protein_coding	1.78051	3.18597	5.27313	4.46473	2.64393	2.04684	2.89188	3.73607	2.00879	0.15639	0.555236
ENSG00000136861	CDK5 regulatory subunit associated protein 2 [Source:HGNC Symbol;Acc:18672]	CDK5RAP2	protein_coding	3.0751	5.31132	1.41864	5.6832	4.98212	2.47821	4.91414	4.78542	2.00597	0.156681	0.555971
ENSG00000114405	chromosome 3 open reading frame 14 [Source:HGNC Symbol;Acc:25024]	C3orf14	protein_coding	3.00679	5.53527	1.41864	3.9009	6.08753	3.69659	6.00537	3.80367	2.00367	0.156919	0.556521
ENSG00000196235	suppressor of Ty 5 homolog (S. cerevisiae) [Source:HGNC Symbol;Acc:11469]	SUPT5H	protein_coding	-2.00598	4.85841	1.41864	5.75046	3.35301	5.75187	3.31063	5.75083	2.00231	0.15706	0.556727
ENSG00000107581	eukaryotic translation initiation factor 3, subunit A [Source:HGNC Symbol;Acc:3271]	EIF3A	protein_coding	1.23587	8.24459	8.18019	7.6791	8.42673	7.87495	8.41192	7.78079	2.00011	0.157288	0.556971
ENSG00000113558	S-phase kinase-associated protein 1 [Source:HGNC Symbol;Acc:10899]	SKP1	protein_coding	-1.08207	8.78561	8.95002	9.79596	7.62865	9.66114	7.7566	9.73018	1.99933	0.157369	0.556971
ENSG00000146425	dynein, light chain, Tctex-type 1 [Source:HGNC Symbol;Acc:11697]	DYNLT1	protein_coding	-1.2474	7.72966	5.34654	8.18044	6.90941	8.84666	6.85118	8.55088	1.99893	0.15741	0.556971
ENSG00000138185	ectonucleoside triphosphate diphosphohydrolase 1 [Source:HGNC Symbol;Acc:3363]	ENTPD1	protein_coding	1.46642	4.42486	5.27612	4.91657	4.19136	3.50526	4.25652	4.38278	1.99836	0.15747	0.556971
ENSG00000133606	makorin ring finger protein 1 [Source:HGNC Symbol;Acc:7112]	MKRN1	protein_coding	2.05448	6.15228	1.41864	7.57948	5.84104	4.48259	5.76387	6.72661	1.99764	0.157544	0.556971
ENSG00000147400	centrin, EF-hand protein, 2 [Source:HGNC Symbol;Acc:1867]	CETN2	protein_coding	-2.34321	3.90136	1.41864	4.84647	2.6463	5.37786	2.61446	5.13199	1.99136	0.158198	0.558591
ENSG00000116833	nuclear receptor subfamily 5, group A, member 2 [Source:HGNC Symbol;Acc:7984]	NR5A2	protein_coding	1.6925	6.92391	7.49844	7.2221	7.14711	5.65794	7.17036	6.6231	1.991	0.158237	0.558591
ENSG00000144228	speckle-type POZ protein-like [Source:HGNC Symbol;Acc:27934]	SPOPL	protein_coding	2.20101	2.67311	2.41864	3.13708	2.71245	1.72065	2.69982	2.65044	1.98944	0.1584	0.558591
ENSG00000183943	protein kinase, X-linked [Source:HGNC Symbol;Acc:9441]	PRKX	protein_coding	-1.01725	5.01509	5.05613	5.35203	4.26059	6.23929	4.30415	5.86868	1.98876	0.15847	0.558591
ENSG00000100528	cornichon family AMPA receptor auxiliary protein 1 [Source:HGNC Symbol;Acc:19431]	CNIH1	protein_coding	1.81787	7.13939	9.9125	3.75056	7.08195	7.30343	7.54536	6.44121	1.98732	0.158621	0.558591
ENSG00000163492	coiled-coil domain containing 141 [Source:HGNC Symbol;Acc:26821]	CCDC141	protein_coding	2.65782	5.01958	3.13013	5.94241	4.99002	3.28036	4.93759	5.1344	1.98519	0.158844	0.558591
ENSG00000165688	peptidase (mitochondrial processing) alpha [Source:HGNC Symbol;Acc:18667]	PMPCA	protein_coding	-1.06485	6.14036	5.0108	6.64081	5.45819	7.2563	5.4363	6.98367	1.985	0.158865	0.558591
ENSG00000083067	transient receptor potential cation channel, subfamily M, member 3 [Source:HGNC Symbol;Acc:17992]	TRPM3	protein_coding	-0.889412	3.88094	4.6536	4.59913	2.84149	4.74146	2.96788	4.67094	1.98435	0.158933	0.558591
ENSG00000177570	sterile alpha motif domain containing 12 [Source:HGNC Symbol;Acc:31750]	SAMD12	protein_coding	-1.96173	5.07347	2.0036	6.92984	3.28232	5.50105	3.24696	6.38893	1.98427	0.158942	0.558591
ENSG00000166908	phosphatidylinositol-5-phosphate 4-kinase, type II, gamma [Source:HGNC Symbol;Acc:23786]	PIP4K2C	protein_coding	-2.51132	6.10843	1.41864	6.42028	4.68083	7.74293	4.6187	7.21856	1.98166	0.159216	0.558591
ENSG00000173542	MOB kinase activator 1B [Source:HGNC Symbol;Acc:29801]	MOB1B	protein_coding	-1.50694	5.8676	2.07399	7.78322	4.52178	6.39189	4.4567	7.23811	1.97824	0.159576	0.558591
ENSG00000175414	ADP-ribosylation factor-like 10 [Source:HGNC Symbol;Acc:22042]	ARL10	protein_coding	-0.852749	3.72921	4.53717	4.81272	2.3774	3.99732	2.53108	4.48432	1.97806	0.159595	0.558591
ENSG00000169221	TBC1 domain family, member 10B [Source:HGNC Symbol;Acc:24510]	TBC1D10B	protein_coding	1.00379	3.9547	6.33703	3.83877	3.79364	3.88056	4.06292	3.85902	1.9779	0.159612	0.558591
ENSG00000116754	serine/arginine-rich splicing factor 11 [Source:HGNC Symbol;Acc:10782]	SRSF11	protein_coding	-1.04056	7.48637	7.75991	7.36464	6.81706	9.02675	6.89469	8.40953	1.97789	0.159613	0.558591
ENSG00000068001	hyaluronoglucosaminidase 2 [Source:HGNC Symbol;Acc:5321]	HYAL2	protein_coding	-3.74831	4.12895	1.41864	3.57067	2.19854	6.26913	2.17659	5.47538	1.97669	0.15974	0.558591
ENSG00000186300	zinc finger protein 555 [Source:HGNC Symbol;Acc:28382]	ZNF555	protein_coding	-1.1286	3.59209	2.82191	3.64447	2.92624	4.9297	2.91916	4.41662	1.97649	0.159761	0.558591
ENSG00000148985	post-GPI attachment to proteins 2 [Source:HGNC Symbol;Acc:17893]	PGAP2	protein_coding	-4.53713	6.37215	1.41864	6.90063	3.09228	8.0254	3.04766	7.5685	1.9763	0.159781	0.558591
ENSG00000140943	membrane-bound transcription factor peptidase, site 1 [Source:HGNC Symbol;Acc:15456]	MBTPS1	protein_coding	1.30207	4.99066	5.5061	2.55693	5.08777	5.14827	5.11022	4.38695	1.97524	0.159893	0.558591
ENSG00000146463	zinc finger, MYM-type 4 [Source:HGNC Symbol;Acc:13055]	ZMYM4	protein_coding	-2.88535	6.83122	1.41864	6.92851	5.64204	8.25165	5.56891	7.74047	1.9752	0.159897	0.558591
ENSG00000163605	protein phosphatase 4, regulatory subunit 2 [Source:HGNC Symbol;Acc:18296]	PPP4R2	protein_coding	-1.90538	4.52322	1.41864	5.11721	3.39801	5.49785	3.35474	5.32269	1.97517	0.159901	0.558591
ENSG00000168255	polymerase (RNA) II (DNA directed) polypeptide J3 [Source:HGNC Symbol;Acc:33853]	POLR2J3	protein_coding	1.18449	6.06589	9.59897	6.91731	5.2542	5.45612	6.3663	6.3481	1.97489	0.15993	0.558591
ENSG00000170485	neuronal PAS domain protein 2 [Source:HGNC Symbol;Acc:7895]	NPAS2	protein_coding	-1.51334	2.93643	3.0036	4.53321	1.62287	3.55588	1.68671	4.1572	1.97467	0.159953	0.558591
ENSG00000121274	PAP associated domain containing 5 [Source:HGNC Symbol;Acc:30758]	PAPD5	protein_coding	3.16545	4.33128	3.41864	5.41934	4.07962	1.77189	4.0551	4.66222	1.97347	0.16008	0.558591
ENSG00000077809	general transcription factor IIi [Source:HGNC Symbol;Acc:4659]	GTF2I	protein_coding	-1.04365	7.75523	6.46914	8.06907	7.0415	8.93347	7.01244	8.55954	1.97099	0.160343	0.558591
ENSG00000073009	inhibitor of kappa light polypeptide gene enhancer in B-cells, kinase gamma [Source:HGNC Symbol;Acc:5961]	IKBKG	protein_coding	-1.09451	3.77594	5.2296	4.75658	2.54543	4.94096	2.79114	4.85265	1.97068	0.160375	0.558591
ENSG00000184575	exportin, tRNA [Source:HGNC Symbol;Acc:12826]	XPOT	protein_coding	1.87842	5.22444	4.69365	6.50628	5.07565	3.73418	5.05557	5.74118	1.96981	0.160468	0.558591
ENSG00000108854	SMAD specific E3 ubiquitin protein ligase 2 [Source:HGNC Symbol;Acc:16809]	SMURF2	protein_coding	-1.39395	5.3258	3.34274	5.93431	4.4908	6.47153	4.45295	6.23396	1.96924	0.160528	0.558591
ENSG00000058673	zinc finger CCCH-type containing 11A [Source:HGNC Symbol;Acc:29093]	ZC3H11A	protein_coding	-1.5198	7.50447	4.11908	8.54787	6.43723	8.47824	6.36963	8.5136	1.96917	0.160536	0.558591
ENSG00000047644	WWC family member 3 [Source:HGNC Symbol;Acc:29237]	WWC3	protein_coding	4.1077	4.7987	1.41864	5.01522	4.80035	1.98178	4.73139	4.22766	1.96852	0.160605	0.558591
ENSG00000198961	praja ring finger 2, E3 ubiquitin protein ligase [Source:HGNC Symbol;Acc:17481]	PJA2	protein_coding	-1.74392	6.78854	4.11908	7.94714	5.30736	7.56353	5.26454	7.77029	1.96807	0.160653	0.558591
ENSG00000165092	aldehyde dehydrogenase 1 family, member A1 [Source:HGNC Symbol;Acc:402]	ALDH1A1	protein_coding	2.41127	8.73813	4.81096	8.06524	8.81176	7.27905	8.72197	7.72741	1.96754	0.160709	0.558591
ENSG00000152240	HAUS augmin-like complex, subunit 1 [Source:HGNC Symbol;Acc:25174]	HAUS1	protein_coding	-1.62869	4.28067	3.19895	4.3449	3.40098	5.80633	3.39019	5.21767	1.96709	0.160758	0.558591
ENSG00000170004	chromodomain helicase DNA binding protein 3 [Source:HGNC Symbol;Acc:1918]	CHD3	protein_coding	-2.50657	4.68838	1.41864	6.55973	1.19519	3.40473	1.19785	5.71707	1.96643	0.160827	0.558591
ENSG00000137767	sulfide quinone reductase-like (yeast) [Source:HGNC Symbol;Acc:20390]	SQRDL	protein_coding	3.19584	7.24241	1.41864	6.08396	7.72744	5.03103	7.63622	5.65359	1.96635	0.160836	0.558591
ENSG00000117620	solute carrier family 35 (UDP-N-acetylglucosamine (UDP-GlcNAc) transporter), member A3 [Source:HGNC Symbol;Acc:11023]	SLC35A3	protein_coding	1.37152	4.49965	3.90278	4.46175	4.62997	3.83403	4.60198	4.16824	1.96488	0.160992	0.558845
ENSG00000221955	solute carrier family 12, member 8 [Source:HGNC Symbol;Acc:15595]	SLC12A8	protein_coding	2.06654	4.00969	5.15687	5.15539	3.7252	2.68507	3.81762	4.32405	1.96369	0.16112	0.558998
ENSG00000119685	tubulin tyrosine ligase-like family, member 5 [Source:HGNC Symbol;Acc:19963]	TTLL5	protein_coding	-1.35899	4.6791	5.37377	4.36767	3.66174	6.54124	3.78589	5.8208	1.96193	0.161307	0.559361
ENSG00000047410	translocated promoter region, nuclear basket protein [Source:HGNC Symbol;Acc:12017]	TPR	protein_coding	1.60819	7.11123	2.74057	7.57021	7.26538	6.10975	7.17702	7.03201	1.96057	0.161453	0.55952
ENSG00000265681	ribosomal protein L17 [Source:HGNC Symbol;Acc:10307]	RPL17	protein_coding	1.30934	8.58434	5.87413	7.3711	8.85123	8.05481	8.76763	7.7545	1.95988	0.161527	0.55952
ENSG00000091039	oxysterol binding protein-like 8 [Source:HGNC Symbol;Acc:16396]	OSBPL8	protein_coding	1.65557	6.03263	9.82591	6.54301	4.4391	3.97415	6.18107	5.81075	1.95832	0.161693	0.55952
ENSG00000060971	acetyl-CoA acyltransferase 1 [Source:HGNC Symbol;Acc:82]	ACAA1	protein_coding	-2.87724	4.46884	1.41864	4.70992	3.43958	6.65441	3.39451	5.96008	1.95773	0.161756	0.55952
ENSG00000124226	ring finger protein 114 [Source:HGNC Symbol;Acc:13094]	RNF114	protein_coding	3.35748	5.86587	1.41864	5.70963	6.32146	3.57509	6.23857	5.0529	1.95676	0.16186	0.55952
ENSG00000079277	MAP kinase interacting serine/threonine kinase 1 [Source:HGNC Symbol;Acc:7110]	MKNK1	protein_coding	1.5321	5.79964	4.46041	4.93882	6.26994	5.36348	6.20722	5.16562	1.95476	0.162075	0.55952
ENSG00000169155	zinc finger and BTB domain containing 43 [Source:HGNC Symbol;Acc:17908]	ZBTB43	protein_coding	1.28309	7.44723	11.866	5.7191	5.8445	7.22717	8.17761	6.64815	1.95469	0.162082	0.55952
ENSG00000164244	proline-rich coiled-coil 1 [Source:HGNC Symbol;Acc:28164]	PRRC1	protein_coding	2.77464	6.02213	1.41864	6.94917	6.31165	4.05277	6.22983	6.12232	1.95466	0.162086	0.55952
ENSG00000198707	centrosomal protein 290kDa [Source:HGNC Symbol;Acc:29021]	CEP290	protein_coding	3.24156	3.99303	1.41864	3.97055	4.2135	2.04825	4.15926	3.35284	1.95448	0.162105	0.55952
ENSG00000157601	myxovirus (influenza virus) resistance 1, interferon-inducible protein p78 (mouse) [Source:HGNC Symbol;Acc:7532]	MX1	protein_coding	2.80311	4.99312	1.89372	3.83735	5.34972	3.35153	5.27986	3.62843	1.95049	0.162534	0.560712
ENSG00000084733	RAB10, member RAS oncogene family [Source:HGNC Symbol;Acc:9759]	RAB10	protein_coding	-1.68543	7.15831	2.41864	7.25859	6.50804	8.15304	6.42693	7.77329	1.94859	0.162739	0.561133
ENSG00000063177	ribosomal protein L18 [Source:HGNC Symbol;Acc:10310]	RPL18	protein_coding	1.5307	8.98425	1.41864	7.57337	9.18922	8.06279	9.09294	7.83919	1.94646	0.162969	0.561482
ENSG00000106246	pentatricopeptide repeat domain 1 [Source:HGNC Symbol;Acc:22198]	PTCD1	protein_coding	-1.17498	4.16725	3.17139	6.50798	2.3958	3.89651	2.42568	5.73124	1.9461	0.163008	0.561482
ENSG00000152492	coiled-coil domain containing 50 [Source:HGNC Symbol;Acc:18111]	CCDC50	protein_coding	2.13732	6.47364	2.0036	8.20613	5.7755	4.33139	5.70172	7.30406	1.94457	0.163173	0.561553
ENSG00000164329	PAP associated domain containing 4 [Source:HGNC Symbol;Acc:26776]	PAPD4	protein_coding	3.02555	5.81581	1.41864	5.93783	6.03605	3.13164	5.95458	5.13553	1.94358	0.16328	0.561553
ENSG00000196998	WD repeat domain 45 [Source:HGNC Symbol;Acc:28912]	WDR45	protein_coding	-1.49216	6.00393	3.17566	6.03802	5.21356	7.84095	5.15742	7.18741	1.94346	0.163293	0.561553
ENSG00000156804	F-box protein 32 [Source:HGNC Symbol;Acc:16731]	FBXO32	protein_coding	3.72183	6.56536	1.41864	1.56704	7.29045	4.09002	7.20125	3.30125	1.94206	0.163445	0.561553
ENSG00000185787	mortality factor 4 like 1 [Source:HGNC Symbol;Acc:16989]	MORF4L1	protein_coding	-0.991313	8.81008	8.44655	9.51536	7.92778	9.66684	7.96608	9.5926	1.94141	0.163515	0.561553
ENSG00000164610	retinitis pigmentosa 9 (autosomal dominant) [Source:HGNC Symbol;Acc:10288]	RP9	protein_coding	-2.41724	3.80093	1.41864	3.32146	2.80251	5.55097	2.7682	4.86714	1.94126	0.163531	0.561553
ENSG00000264194	CDNA FLJ25865 fis, clone CBR01927 [Source:UniProtKB/TrEMBL;Acc:Q8N7A4]	AC000003.2	protein_coding	-1.08118	4.20206	2.2586	5.59645	3.24023	4.63546	3.20957	5.18804	1.93786	0.163901	0.561839
ENSG00000100722	zinc finger CCCH-type containing 14 [Source:HGNC Symbol;Acc:20509]	ZC3H14	protein_coding	3.74255	6.18169	2.0036	5.63669	6.37433	3.58015	6.29309	4.96942	1.93758	0.163931	0.561839
ENSG00000125691	ribosomal protein L23 [Source:HGNC Symbol;Acc:10316]	RPL23	protein_coding	1.03	9.99961	9.58829	9.20717	10.0446	9.55878	10.0185	9.39347	1.9375	0.16394	0.561839
ENSG00000111897	serine incorporator 1 [Source:HGNC Symbol;Acc:13464]	SERINC1	protein_coding	-1.26838	7.61627	2.01796	7.44237	7.19806	9.02698	7.11032	8.44153	1.93731	0.163961	0.561839
ENSG00000138434	sperm specific antigen 2 [Source:HGNC Symbol;Acc:11319]	SSFA2	protein_coding	2.49725	5.96068	1.41864	7.20093	5.66463	3.85946	5.59082	6.35573	1.93645	0.164054	0.561839
ENSG00000175826	CTD nuclear envelope phosphatase 1 [Source:HGNC Symbol;Acc:19085]	CTDNEP1	protein_coding	-1.78891	4.79298	2.41864	1.02736	3.55941	6.32714	3.52615	5.38286	1.93535	0.164175	0.561839
ENSG00000137145	DENN/MADD domain containing 4C [Source:HGNC Symbol;Acc:26079]	DENND4C	protein_coding	-1.82075	6.94971	1.41864	4.43431	6.54756	8.73171	6.46358	7.78697	1.9351	0.164201	0.561839
ENSG00000108443	ribosomal protein S6 kinase, 70kDa, polypeptide 1 [Source:HGNC Symbol;Acc:10436]	RPS6KB1	protein_coding	1.69466	6.62837	4.0036	7.805	6.28654	5.09534	6.21931	7.02018	1.9322	0.164518	0.562624
ENSG00000004534	RNA binding motif protein 6 [Source:HGNC Symbol;Acc:9903]	RBM6	protein_coding	-1.11076	7.6903	10.2129	7.88163	6.11673	9.19087	7.09912	8.67739	1.93125	0.164622	0.562624
ENSG00000125652	alkB, alkylation repair homolog 7 (E. coli) [Source:HGNC Symbol;Acc:21306]	ALKBH7	protein_coding	2.9204	4.36382	1.41864	0.782754	4.7785	2.81363	4.71469	2.07845	1.92995	0.164763	0.562624
ENSG00000181904	chromosome 5 open reading frame 24 [Source:HGNC Symbol;Acc:26746]	C5orf24	protein_coding	-1.41454	4.22312	1.41864	5.72211	3.28869	4.66386	3.24683	5.28352	1.9296	0.164802	0.562624
ENSG00000091317	CKLF-like MARVEL transmembrane domain containing 6 [Source:HGNC Symbol;Acc:19177]	CMTM6	protein_coding	-1.9711	6.20064	2.0036	5.76414	5.28609	7.96385	5.21891	7.23606	1.92875	0.164895	0.562624
ENSG00000107223	endothelial differentiation-related factor 1 [Source:HGNC Symbol;Acc:3164]	EDF1	protein_coding	1.18507	7.26187	7.75849	6.23649	7.38608	7.03813	7.41124	6.69177	1.92774	0.165006	0.562624
ENSG00000198830	high mobility group nucleosomal binding domain 2 [Source:HGNC Symbol;Acc:4986]	HMGN2	protein_coding	-0.924044	8.40793	8.78933	8.89146	7.63429	9.4191	7.74148	9.17866	1.92702	0.165084	0.562624
ENSG00000163110	PDZ and LIM domain 5 [Source:HGNC Symbol;Acc:17468]	PDLIM5	protein_coding	-1.13169	7.1042	3.39867	7.39289	6.43275	8.16178	6.35762	7.82588	1.92686	0.165102	0.562624
ENSG00000197956	S100 calcium binding protein A6 [Source:HGNC Symbol;Acc:10496]	S100A6	protein_coding	-1.7058	9.64591	1.41864	9.92827	8.66071	10.8733	8.56533	10.4761	1.92474	0.165335	0.56313
ENSG00000114455	HERV-H LTR-associating 2 [Source:HGNC Symbol;Acc:4905]	HHLA2	protein_coding	3.68834	5.94721	1.41864	3.23621	6.75296	3.49962	6.66711	3.36639	1.92262	0.165568	0.563405
ENSG00000115808	striatin, calmodulin binding protein [Source:HGNC Symbol;Acc:11424]	STRN	protein_coding	3.11755	3.20941	1.41864	2.27575	3.62429	1.61669	3.57679	1.98849	1.92248	0.165584	0.563405
ENSG00000174840	phosphodiesterase 12 [Source:HGNC Symbol;Acc:25386]	PDE12	protein_coding	1.37104	4.5357	4.83007	5.32626	4.38821	3.51979	4.40857	4.7148	1.91925	0.165939	0.564106
ENSG00000131943	chromosome 19 open reading frame 12 [Source:HGNC Symbol;Acc:25443]	C19orf12	protein_coding	3.39649	2.39015	1.41864	1.32628	2.55301	1.06779	2.52213	1.20882	1.91879	0.16599	0.564106
ENSG00000114503	nuclear cap binding protein subunit 2, 20kDa [Source:HGNC Symbol;Acc:7659]	NCBP2	protein_coding	2.48686	6.32886	3.41864	5.99021	6.43482	4.88827	6.36074	5.57641	1.91832	0.166042	0.564106
ENSG00000159346	adiponectin receptor 1 [Source:HGNC Symbol;Acc:24040]	ADIPOR1	protein_coding	2.01677	6.38617	1.41864	1.75789	6.85703	5.4632	6.77112	4.56985	1.91753	0.166129	0.564116
ENSG00000138375	SWI/SNF related, matrix associated, actin dependent regulator of chromatin, subfamily a-like 1 [Source:HGNC Symbol;Acc:11102]	SMARCAL1	protein_coding	-0.988795	3.31668	3.16065	3.44938	2.74582	4.341	2.7589	3.96353	1.91505	0.166404	0.564467
ENSG00000179674	ADP-ribosylation factor-like 14 [Source:HGNC Symbol;Acc:22974]	ARL14	protein_coding	5.07757	4.20887	1.41864	5.14686	4.25935	1.13861	4.20322	4.2828	1.91445	0.16647	0.564467
ENSG00000197622	CDC42 small effector 1 [Source:HGNC Symbol;Acc:17719]	CDC42SE1	protein_coding	-1.38331	5.5618	5.60213	5.87145	4.53264	6.74154	4.60167	6.36486	1.91431	0.166485	0.564467
ENSG00000148843	programmed cell death 11 [Source:HGNC Symbol;Acc:13408]	PDCD11	protein_coding	2.58689	4.74315	1.41864	3.9994	5.08849	3.24169	5.02207	3.66855	1.9119	0.166752	0.564921
ENSG00000107771	coiled-coil serine-rich protein 2 [Source:HGNC Symbol;Acc:29197]	CCSER2	protein_coding	-1.35973	5.4911	3.14111	4.40062	4.72488	6.95398	4.67844	6.20707	1.91099	0.166853	0.564921
ENSG00000186335	solute carrier family 36 (proton/amino acid symporter), member 2 [Source:HGNC Symbol;Acc:18762]	SLC36A2	protein_coding	-0.817501	3.11582	3.94596	3.17282	2.3522	4.22133	2.44134	3.78586	1.91082	0.166872	0.564921
ENSG00000174628	IQ motif containing K [Source:HGNC Symbol;Acc:28556]	IQCK	protein_coding	-2.68187	5.18244	1.41864	3.8697	4.3	7.19106	4.24328	6.34202	1.90628	0.167377	0.565645
ENSG00000148218	aminolevulinate dehydratase [Source:HGNC Symbol;Acc:395]	ALAD	protein_coding	4.1873	5.17956	1.41864	2.38325	5.5136	2.51279	5.44292	2.44775	1.90579	0.167432	0.565645
ENSG00000198900	topoisomerase (DNA) I [Source:HGNC Symbol;Acc:11986]	TOP1	protein_coding	-1.52233	5.9127	1.41864	5.86074	5.33154	7.1868	5.25669	6.60343	1.90466	0.167558	0.565645
ENSG00000110060	pseudouridylate synthase 3 [Source:HGNC Symbol;Acc:25461]	PUS3	protein_coding	-1.44471	5.68261	4.74489	5.73004	4.7844	7.15103	4.78047	6.60043	1.90363	0.167672	0.565645
ENSG00000011260	UTP18 small subunit (SSU) processome component homolog (yeast) [Source:HGNC Symbol;Acc:24274]	UTP18	protein_coding	-2.74511	5.74258	1.41864	5.05667	4.30005	7.6276	4.24439	6.85607	1.90201	0.167854	0.565645
ENSG00000116127	Alstrom syndrome 1 [Source:HGNC Symbol;Acc:428]	ALMS1	protein_coding	-2.26259	4.33143	1.41864	5.2593	3.0116	5.4508	2.97348	5.36159	1.90135	0.167928	0.565645
ENSG00000135541	Abelson helper integration site 1 [Source:HGNC Symbol;Acc:21575]	AHI1	protein_coding	-1.20663	6.28644	8.55276	7.41438	4.50409	7.28901	5.36164	7.35274	1.89816	0.168284	0.565645
ENSG00000162772	activating transcription factor 3 [Source:HGNC Symbol;Acc:785]	ATF3	protein_coding	2.97951	5.31389	1.41864	4.77585	5.59203	3.43211	5.51865	4.29019	1.89745	0.168364	0.565645
ENSG00000111696	5'-nucleotidase domain containing 3 [Source:HGNC Symbol;Acc:30826]	NT5DC3	protein_coding	1.59687	6.26619	6.89308	7.30733	5.98337	5.18608	6.05041	6.60402	1.89713	0.1684	0.565645
ENSG00000134900	tripeptidyl peptidase II [Source:HGNC Symbol;Acc:12016]	TPP2	protein_coding	2.24774	5.13747	1.41864	4.93058	5.23137	3.7513	5.1642	4.49824	1.89694	0.168421	0.565645
ENSG00000007168	platelet-activating factor acetylhydrolase 1b, regulatory subunit 1 (45kDa) [Source:HGNC Symbol;Acc:8574]	PAFAH1B1	protein_coding	-1.92746	6.95433	1.41864	6.04986	6.51037	8.91582	6.42611	8.09087	1.89312	0.16885	0.565645
ENSG00000131876	small nuclear ribonucleoprotein polypeptide A' [Source:HGNC Symbol;Acc:11152]	SNRPA1	protein_coding	2.19606	6.09279	1.41864	6.63316	6.02645	4.56608	5.94792	5.98108	1.89216	0.168959	0.565645
ENSG00000099940	synaptosomal-associated protein, 29kDa [Source:HGNC Symbol;Acc:11133]	SNAP29	protein_coding	-1.05991	3.27874	4.10906	4.59348	2.14544	4.02477	2.27002	4.35259	1.89185	0.168994	0.565645
ENSG00000121067	speckle-type POZ protein [Source:HGNC Symbol;Acc:11254]	SPOP	protein_coding	-1.42417	6.29818	2.99395	6.95006	5.58585	7.07481	5.52003	7.01269	1.89174	0.169006	0.565645
ENSG00000168028	ribosomal protein SA [Source:HGNC Symbol;Acc:6502]	RPSA	protein_coding	1.32255	9.68319	1.41864	8.56393	9.90315	9.0029	9.80563	8.79926	1.89069	0.169124	0.565645
ENSG00000130529	transient receptor potential cation channel, subfamily M, member 4 [Source:HGNC Symbol;Acc:17993]	TRPM4	protein_coding	1.12267	4.25405	6.66086	4.3176	3.94485	3.90743	4.27627	4.1237	1.89063	0.169131	0.565645
ENSG00000213923	casein kinase 1, epsilon [Source:HGNC Symbol;Acc:2453]	CSNK1E	protein_coding	1.95203	5.58073	3.45426	5.85088	5.32371	4.02811	5.26671	5.19823	1.8899	0.169214	0.565645
[truncated: 4,706 more rows]

## Sheet: NonT2D.Acinar.vs.Stellate
	Description	Associated.Gene.Name	Gene.Biotype	logFC	logCPM	Acinar Male avelogCPM	Stellate Male avelogCPM	Acinar Female avelogCPM	Stellate Female avelogCPM	Acinar avelogCPM	Stellate avelogCPM	LR	PValue	FDR
ENSG00000142789	chymotrypsin-like elastase family, member 3A [Source:HGNC Symbol;Acc:15944]	CELA3A	protein_coding	16.2688	14.2443	9.63254	0.0490583	14.6096	0.204474	14.5134	0.0821772	136.371	1.66e-31	1.09e-27
ENSG00000168542	collagen, type III, alpha 1 [Source:HGNC Symbol;Acc:2201]	COL3A1	protein_coding	-13.7173	9.744	1.4303	11.5698	0.0629078	11.6933	0.117187	11.5982	132.606	1.1e-30	3.61e-27
ENSG00000153002	carboxypeptidase B1 (tissue) [Source:HGNC Symbol;Acc:2299]	CPB1	protein_coding	15.4862	14.3226	7.13074	0.129744	14.7331	0.204474	14.6342	0.145147	106.476	5.8e-25	1.27e-21
ENSG00000163430	follistatin-like 1 [Source:HGNC Symbol;Acc:3972]	FSTL1	protein_coding	-13.7647	7.51588	1.4303	8.85483	-0.0916363	9.89853	-0.0275455	9.15973	94.0175	3.13e-22	5.13e-19
ENSG00000182492	biglycan [Source:HGNC Symbol;Acc:1044]	BGN	protein_coding	-11.946	8.58732	1.4303	10.6447	0.0403499	9.40966	0.095719	10.4475	83.387	6.75e-20	8.27e-17
ENSG00000115461	insulin-like growth factor binding protein 5 [Source:HGNC Symbol;Acc:5474]	IGFBP5	protein_coding	-13.877	8.64738	1.4303	10.2793	-0.040362	11.0442	0.0203025	10.4875	83.1598	7.57e-20	8.27e-17
ENSG00000139329	lumican [Source:HGNC Symbol;Acc:6724]	LUM	protein_coding	-13.0185	8.89355	1.4303	10.6036	0.102962	11.2331	0.154577	10.769	81.5111	1.74e-19	1.63e-16
ENSG00000170835	carboxyl ester lipase [Source:HGNC Symbol;Acc:1848]	CEL	protein_coding	13.1783	8.69095	9.64401	0.0490583	9.03305	0.204474	9.0813	0.0821772	80.4822	2.93e-19	2.4e-16
ENSG00000113721	platelet-derived growth factor receptor, beta polypeptide [Source:HGNC Symbol;Acc:8804]	PDGFRB	protein_coding	-11.5514	7.18753	1.4303	8.64531	0.10388	9.77338	0.155468	8.9816	75.9521	2.91e-18	2.12e-15
ENSG00000171617	ectodermal-neural cortex 1 (with BTB domain) [Source:HGNC Symbol;Acc:3345]	ENC1	protein_coding	-9.66047	7.39796	2.01526	9.50288	0.0152729	7.73327	0.120395	9.25725	70.9372	3.69e-17	2.42e-14
ENSG00000130635	collagen, type V, alpha 1 [Source:HGNC Symbol;Acc:2209]	COL5A1	protein_coding	-12.4093	6.57622	1.4303	8.25272	-0.0916363	8.87262	-0.0275455	8.41501	66.5135	3.48e-16	2.07e-13
ENSG00000118640	vesicle-associated membrane protein 8 [Source:HGNC Symbol;Acc:12647]	VAMP8	protein_coding	11.9503	7.23606	8.55442	0.0490583	7.62225	0.204474	7.70077	0.0821772	63.9407	1.28e-15	7.01e-13
ENSG00000108679	lectin, galactoside-binding, soluble, 3 binding protein [Source:HGNC Symbol;Acc:6564]	LGALS3BP	protein_coding	-11.5437	7.23636	1.4303	8.45573	0.152138	10.1353	0.200805	9.02865	60.8958	6.02e-15	3.04e-12
ENSG00000089057	solute carrier family 23 (ascorbic acid transporter), member 2 [Source:HGNC Symbol;Acc:10973]	SLC23A2	protein_coding	-11.0455	4.18786	1.4303	4.50414	-0.0916363	7.17427	-0.0275455	5.63234	59.4699	1.24e-14	5.82e-12
ENSG00000151617	endothelin receptor type A [Source:HGNC Symbol;Acc:3179]	EDNRA	protein_coding	-12.1049	5.84887	1.4303	7.25	-0.0916363	8.66097	-0.0275455	7.70392	59.3214	1.34e-14	5.85e-12
ENSG00000219073	chymotrypsin-like elastase family, member 3B [Source:HGNC Symbol;Acc:15945]	CELA3B	protein_coding	14.2483	13.0061	2.73773	0.0490583	13.4061	0.204474	13.3068	0.0821772	55.0213	1.19e-13	4.89e-11
ENSG00000108821	collagen, type I, alpha 1 [Source:HGNC Symbol;Acc:2197]	COL1A1	protein_coding	-11.845	10.1957	1.4303	12.0338	0.737999	12.2437	0.758285	12.0832	54.1967	1.81e-13	7e-11
ENSG00000166741	nicotinamide N-methyltransferase [Source:HGNC Symbol;Acc:7861]	NNMT	protein_coding	-10.5098	6.3526	1.4303	8.1262	0.0571334	8.25277	0.11157	8.15509	52.0366	5.45e-13	1.98e-10
ENSG00000038427	versican [Source:HGNC Symbol;Acc:2464]	VCAN	protein_coding	-13.8101	7.24562	1.4303	8.1121	-0.0916363	10.4477	-0.0275455	9.03549	51.7396	6.34e-13	2.19e-10
ENSG00000189184	protocadherin 18 [Source:HGNC Symbol;Acc:14268]	PCDH18	protein_coding	-11.5843	4.52253	1.4303	3.90122	-0.0916363	8.22074	-0.0275455	6.25839	50.1881	1.4e-12	4.57e-10
ENSG00000187021	pancreatic lipase-related protein 1 [Source:HGNC Symbol;Acc:9156]	PNLIPRP1	protein_coding	12.1546	9.76069	8.2695	0.383309	10.098	0.204474	10.0282	0.347645	50.0958	1.46e-12	4.57e-10
ENSG00000169604	anthrax toxin receptor 1 [Source:HGNC Symbol;Acc:21014]	ANTXR1	protein_coding	-10.2614	5.39997	1.4303	6.66141	0.0562008	8.05875	0.110665	7.10761	49.9064	1.61e-12	4.81e-10
ENSG00000136235	glycoprotein (transmembrane) nmb [Source:HGNC Symbol;Acc:4462]	GPNMB	protein_coding	-7.79385	8.93778	3.34868	10.5557	3.05422	10.9002	3.06248	10.6397	48.9117	2.68e-12	7.63e-10
ENSG00000204262	collagen, type V, alpha 2 [Source:HGNC Symbol;Acc:2210]	COL5A2	protein_coding	-10.4638	6.97202	1.4303	9.01794	0.0152729	8.04166	0.0725601	8.85122	48.1293	3.99e-12	1.09e-09
ENSG00000204291	collagen, type XV, alpha 1 [Source:HGNC Symbol;Acc:2192]	COL15A1	protein_coding	-9.15632	6.80049	1.4303	9.01671	-0.0916363	4.84533	-0.0275455	8.67746	48.0505	4.15e-12	1.09e-09
ENSG00000269636		AC010441.1	protein_coding	-11.7945	4.92544	1.4303	5.13254	-0.0916363	8.44644	-0.0275455	6.71239	47.9225	4.43e-12	1.12e-09
ENSG00000169347	glycoprotein 2 (zymogen granule membrane) [Source:HGNC Symbol;Acc:4441]	GP2	protein_coding	11.3207	11.0203	8.25207	0.519353	11.3863	0.913564	11.299	0.610266	47.6969	4.97e-12	1.21e-09
[truncated: 6,530 more rows]

## Sheet: NonT2D.Ductal.vs.Stellate
	Description	Associated.Gene.Name	Gene.Biotype	logFC	logCPM	Ductal Male avelogCPM	Stellate Male avelogCPM	Ductal Female avelogCPM	Stellate Female avelogCPM	Ductal avelogCPM	Stellate avelogCPM	LR	PValue	FDR
[truncated: 6,320 more rows]

[truncated: 40 more sheets: NonT2D.Alpha.vs.Delta, NonT2D.Alpha.vs.Gamma, NonT2D.Beta.vs.Alpha, NonT2D.Beta.vs.Delta, NonT2D.Beta.vs.Gamma, NonT2D.Delta.vs.Gamma, NonT2D.Alpha.vs.Endocrine, NonT2D.Beta.vs.Endocrine, NonT2D.Delta.vs.Endocrine, NonT2D.Gamma.vs.Endocrine, NonT2D.Acinar.vs.Exocrine, NonT2D.Ductal.vs.Exocrine, NonT2D.Stellate.vs.Exocrine, NonT2D.Endocrine.vs.Exocrine, T2D.Alpha.vs.Delta, T2D.Alpha.vs.Gamma, T2D.Beta.vs.Alpha, T2D.Beta.vs.Delta, T2D.Beta.vs.Gamma, T2D.Delta.vs.Gamma …]
