# Supplementary material for: Single-cell transcriptomes identify human islet cell signatures and reveal cell-type–specific expression changes in type 2 diabetes
Source: Genome Res. 2017 Feb;27(2):208–22. doi: 10.1101/gr.212720.116 (PMC5287227; doi:10.1101/gr.212720.116)
Supplement: Supplemental Material [file supp_gr.212720.116_Supplemental_Table_S7.xlsx]

## Sheet: Beta.Signature.Genes
Supplemental_Table_S7: Supervised identification of signature genes for each pancreatic cell type.
A set of signature genes was defined for each of the classified non-diabetic beta, alpha, delta, PP/gamma, stellate, acinar, and ductal pancreatic cell types. The table is divided such that the signature genes for each cell type are on a separate sheet. For each signature gene, an Ensembl gene ID, gene description, associated gene symbol, and gene biotype information is provided. In addition, the…
	Description	Associated.Gene.Name	Gene.Biotype	Beta-Alpha logFC	Beta-Delta logFC	Beta-Gamma logFC	Beta-Alpha logCPM	Beta-Delta logCPM	Beta-Gamma logCPM
ENSG00000254647	insulin [Source:HGNC Symbol;Acc:6081]	INS	protein_coding	9.73606	7.12571	10.1535	14.2257	15.1083	15.1401
ENSG00000106236	neuronal pentraxin II [Source:HGNC Symbol;Acc:7953]	NPTX2	protein_coding	5.85911	2.51222	9.28264	6.95948	7.83818	7.84467
ENSG00000121351	islet amyloid polypeptide [Source:HGNC Symbol;Acc:5329]	IAPP	protein_coding	7.59274	5.56904	8.05886	12.814	13.6769	13.7201
ENSG00000164756	solute carrier family 30 (zinc transporter), member 8 [Source:HGNC Symbol;Acc:20303]	SLC30A8	protein_coding	0.420364	1.89132	3.68391	11.14	11.3617	11.3639
ENSG00000123836	6-phosphofructo-2-kinase/fructose-2,6-biphosphatase 2 [Source:HGNC Symbol;Acc:8873]	PFKFB2	protein_coding	4.90159	3.44665	4.97214	10.3068	11.1448	11.1721
ENSG00000185008	roundabout, axon guidance receptor, homolog 2 (Drosophila) [Source:HGNC Symbol;Acc:10250]	ROBO2	protein_coding	2.00398	9.41462	8.53583	7.09525	7.69066	7.73148
ENSG00000171227	transmembrane protein 37 [Source:HGNC Symbol;Acc:18216]	TMEM37	protein_coding	3.2561	2.91294	9.8049	6.01654	6.80318	6.80864
ENSG00000182759	v-maf avian musculoaponeurotic fibrosarcoma oncogene homolog A [Source:HGNC Symbol;Acc:23145]	MAFA	protein_coding	6.35933	7.32279	7.35193	2.90146	3.65243	3.69013
ENSG00000167244	insulin-like growth factor 2 (somatomedin A) [Source:HGNC Symbol;Acc:5466]	IGF2	protein_coding	5.19632	7.98762	8.93171	4.2741	5.0701	5.09532
ENSG00000168234	tetratricopeptide repeat domain 39C [Source:HGNC Symbol;Acc:26595]	TTC39C	protein_coding	2.85105	2.94208	4.58696	7.58021	8.32058	8.33085
ENSG00000163623	NK6 homeobox 1 [Source:HGNC Symbol;Acc:7839]	NKX6-1	protein_coding	4.86373	7.24772	7.2656	2.84306	3.5841	3.61031
ENSG00000036828	calcium-sensing receptor [Source:HGNC Symbol;Acc:1514]	CASR	protein_coding	8.44319	2.24964	5.40465	7.06695	7.97299	7.96705
ENSG00000117472	tetraspanin 1 [Source:HGNC Symbol;Acc:20657]	TSPAN1	protein_coding	3.81794	7.61152	10.7651	6.1909	6.9801	7.01076
ENSG00000152254	glucose-6-phosphatase, catalytic, 2 [Source:HGNC Symbol;Acc:28906]	G6PC2	protein_coding	2.86093	12.8791	5.30695	9.83258	10.5583	10.5919
ENSG00000058335	Ras protein-specific guanine nucleotide-releasing factor 1 [Source:HGNC Symbol;Acc:9875]	RASGRF1	protein_coding	1.17796	5.19585	7.09934	5.65237	6.08437	6.11264
ENSG00000109971	heat shock 70kDa protein 8 [Source:HGNC Symbol;Acc:5241]	HSPA8	protein_coding	0.8062	1.02247	1.78229	10.7221	11.1219	11.1143
ENSG00000114455	HERV-H LTR-associating 2 [Source:HGNC Symbol;Acc:4905]	HHLA2	protein_coding	0.716487	2.5568	4.12457	2.66032	2.93578	2.93787
ENSG00000111716	lactate dehydrogenase B [Source:HGNC Symbol;Acc:6541]	LDHB	protein_coding	3.51292	7.49379	8.01332	6.3205	7.099	7.1221
ENSG00000048471	sorting nexin 29 [Source:HGNC Symbol;Acc:30542]	SNX29	protein_coding	0.679565	1.75811	3.29135	6.85918	7.18604	7.18612
ENSG00000166265	cysteine/tyrosine-rich 1 [Source:HGNC Symbol;Acc:16274]	CYYR1	protein_coding	2.79898	9.56742	9.60441	5.03151	5.70275	5.74285
ENSG00000155368	diazepam binding inhibitor (GABA receptor modulator, acyl-CoA binding protein) [Source:HGNC Symbol;Acc:2690]	DBI	protein_coding	0.619718	1.74561	1.90133	8.02018	8.32271	8.33797
ENSG00000075035	WSC domain containing 2 [Source:HGNC Symbol;Acc:29117]	WSCD2	protein_coding	5.67209	6.35307	9.96329	5.32046	6.15347	6.1894
ENSG00000099194	stearoyl-CoA desaturase (delta-9-desaturase) [Source:HGNC Symbol;Acc:10571]	SCD	protein_coding	1.21105	1.83903	2.51315	9.38563	9.86772	9.87055
ENSG00000214548	maternally expressed 3 (non-protein coding) [Source:HGNC Symbol;Acc:14575]	MEG3	lincRNA	3.2711	4.97547	2.70516	8.16868	8.95962	8.98708
ENSG00000137642	sortilin-related receptor, L(DLR class) A repeats containing [Source:HGNC Symbol;Acc:11185]	SORL1	protein_coding	2.83099	1.4477	1.94711	8.9092	9.68991	9.69308
ENSG00000079308	tensin 1 [Source:HGNC Symbol;Acc:11973]	TNS1	protein_coding	8.69889	6.89208	9.04419	4.33976	5.1794	5.21104
ENSG00000136720	heparan sulfate 6-O-sulfotransferase 1 [Source:HGNC Symbol;Acc:5201]	HS6ST1	protein_coding	1.77257	3.61285	6.95202	4.58641	5.16663	5.20055
ENSG00000006071	ATP-binding cassette, sub-family C (CFTR/MRP), member 8 [Source:HGNC Symbol;Acc:59]	ABCC8	protein_coding	2.19357	1.93041	2.14908	9.65404	10.3298	10.3459
ENSG00000198739	leucine rich repeat transmembrane neuronal 3 [Source:HGNC Symbol;Acc:19410]	LRRTM3	protein_coding	9.90449	10.0178	9.2658	5.32956	6.20479	6.22068
ENSG00000096384	heat shock protein 90kDa alpha (cytosolic), class B member 1 [Source:HGNC Symbol;Acc:5258]	HSP90AB1	protein_coding	0.737951	0.723699	0.964359	11.4039	11.7988	11.7984
ENSG00000196531	nascent polypeptide-associated complex alpha subunit [Source:HGNC Symbol;Acc:7629]	NACA	protein_coding	0.579557	1.01389	1.5989	8.14292	8.46862	8.47125
ENSG00000115112	transcription factor CP2-like 1 [Source:HGNC Symbol;Acc:17925]	TFCP2L1	protein_coding	8.39011	9.42971	9.45449	4.70392	5.56905	5.59686
ENSG00000232018		AL132709.8	lincRNA	3.36898	7.97421	6.6726	3.48067	4.19513	4.21077
ENSG00000162461	solute carrier family 25, member 34 [Source:HGNC Symbol;Acc:27653]	SLC25A34	protein_coding	4.59206	2.95265	5.29158	8.00428	8.84274	8.86206
ENSG00000129757	cyclin-dependent kinase inhibitor 1C (p57, Kip2) [Source:HGNC Symbol;Acc:1786]	CDKN1C	protein_coding	2.30372	2.72376	3.79431	7.46548	8.16292	8.17109
ENSG00000135905	dedicator of cytokinesis 10 [Source:HGNC Symbol;Acc:23479]	DOCK10	protein_coding	3.02955	8.02267	7.89519	4.66858	5.41181	5.42685
ENSG00000163581	solute carrier family 2 (facilitated glucose transporter), member 2 [Source:HGNC Symbol;Acc:11006]	SLC2A2	protein_coding	9.27771	9.73212	9.74128	5	5.86405	5.87728
ENSG00000145888	glycine receptor, alpha 1 [Source:HGNC Symbol;Acc:4326]	GLRA1	protein_coding	7.32639	7.61417	7.22467	3.99796	4.81846	4.84911
ENSG00000162949	calpain 13 [Source:HGNC Symbol;Acc:16663]	CAPN13	protein_coding	7.97307	8.95959	8.0986	4.98605	5.80328	5.85665
ENSG00000149925	aldolase A, fructose-bisphosphate [Source:HGNC Symbol;Acc:414]	ALDOA	protein_coding	0.601577	1.44001	1.34147	10.3356	10.6327	10.6452
ENSG00000141433	adenylate cyclase activating polypeptide 1 (pituitary) [Source:HGNC Symbol;Acc:241]	ADCYAP1	protein_coding	5.84597	7.71598	2.95739	7.77006	8.65372	8.69148
ENSG00000243444	paralemmin 2 [Source:HGNC Symbol;Acc:15845]	PALM2	protein_coding	2.60425	4.34455	5.03448	4.75407	5.43859	5.45783
ENSG00000185559	delta-like 1 homolog (Drosophila) [Source:HGNC Symbol;Acc:2907]	DLK1	protein_coding	9.45464	10.6753	9.90825	5.96851	6.84543	6.88004
ENSG00000100316	ribosomal protein L3 [Source:HGNC Symbol;Acc:10332]	RPL3	protein_coding	0.957485	1.37254	0.853068	11.9741	12.4017	12.4354
ENSG00000167588	glycerol-3-phosphate dehydrogenase 1 (soluble) [Source:HGNC Symbol;Acc:4455]	GPD1	protein_coding	1.93659	8.81877	8.83656	4.44044	4.9877	5.00858
ENSG00000124783	signal sequence receptor, alpha [Source:HGNC Symbol;Acc:11323]	SSR1	protein_coding	0.36067	1.24099	1.48715	9.805	10.0401	10.0408
ENSG00000148180	gelsolin [Source:HGNC Symbol;Acc:4620]	GSN	protein_coding	3.36327	4.36718	2.24887	6.65162	7.42664	7.47104
ENSG00000118495	pleiomorphic adenoma gene-like 1 [Source:HGNC Symbol;Acc:9046]	PLAGL1	protein_coding	1.8653	3.17915	4.02784	6.57104	7.16048	7.19018
ENSG00000138083	SIX homeobox 3 [Source:HGNC Symbol;Acc:10889]	SIX3	protein_coding	5.96939	7.32132	7.33422	2.86405	3.60611	3.622
ENSG00000140443	insulin-like growth factor 1 receptor [Source:HGNC Symbol;Acc:5465]	IGF1R	protein_coding	1.41226	3.04142	1.87763	8.45086	8.94875	8.98997
ENSG00000029364	solute carrier family 39, member 9 [Source:HGNC Symbol;Acc:20182]	SLC39A9	protein_coding	0.691676	2.70944	2.93661	9.26051	9.57319	9.58975
ENSG00000089169	rabphilin 3A homolog (mouse) [Source:HGNC Symbol;Acc:17056]	RPH3A	protein_coding	7.01872	5.25689	7.65771	4.4549	5.26546	5.32042
ENSG00000115020	phosphoinositide kinase, FYVE finger containing [Source:HGNC Symbol;Acc:23785]	PIKFYVE	protein_coding	1.05667	2.6086	3.55846	5.63969	6.03894	6.06009
ENSG00000122852	surfactant protein A1 [Source:HGNC Symbol;Acc:10798]	SFTPA1	protein_coding	8.97407	8.34064	9.09972	4.39309	5.23492	5.27084
ENSG00000198768	adenomatosis polyposis coli down-regulated 1-like [Source:HGNC Symbol;Acc:26892]	APCDD1L	protein_coding	3.85522	8.61314	8.67142	4.06597	4.77873	4.83729
ENSG00000136161	regulator of chromosome condensation (RCC1) and BTB (POZ) domain containing protein 2 [Source:HGNC Symbol;Acc:1914]	RCBTB2	protein_coding	2.85457	5.48968	6.48808	5.70977	6.37049	6.3956
ENSG00000136051	KIAA1033 [Source:HGNC Symbol;Acc:29174]	KIAA1033	protein_coding	0.819214	2.06008	2.14263	7.06038	7.42317	7.43177
ENSG00000187634	sterile alpha motif domain containing 11 [Source:HGNC Symbol;Acc:28706]	SAMD11	protein_coding	6.94737	4.10701	2.61652	4.68329	5.53139	5.56454
ENSG00000182836	phosphatidylinositol-specific phospholipase C, X domain containing 3 [Source:HGNC Symbol;Acc:31822]	PLCXD3	protein_coding	1.91553	3.37899	2.00853	7.93381	8.54878	8.59365
ENSG00000196177	acyl-CoA dehydrogenase, short/branched chain [Source:HGNC Symbol;Acc:91]	ACADSB	protein_coding	1.62368	2.55933	2.73852	5.78609	6.38478	6.39673
ENSG00000178980	selenoprotein W, 1 [Source:HGNC Symbol;Acc:10752]	SEPW1	protein_coding	1.122	1.26537	1.03049	7.79811	8.27389	8.29479

## Sheet: Alpha.Signature.Genes
	Description	Associated.Gene.Name	Gene.Biotype	Alpha-Beta logFC	Alpha-Delta logFC	Alpha-Gamma logFC	Alpha-Beta logCPM	Alpha-Delta logCPM	Alpha-Gamma logCPM
ENSG00000118271	transthyretin [Source:HGNC Symbol;Acc:12405]	TTR	protein_coding	3.5122	4.5103	2.96943	14.5698	15.3403	15.3622
ENSG00000115263	glucagon [Source:HGNC Symbol;Acc:4191]	GCG	protein_coding	10.3243	10.0141	8.96393	17.1806	18.0858	18.1021
ENSG00000139209	solute carrier family 38, member 4 [Source:HGNC Symbol;Acc:14679]	SLC38A4	protein_coding	3.34736	1.7876	10.3446	7.29714	8.00571	7.98051
ENSG00000211445	glutathione peroxidase 3 (plasma) [Source:HGNC Symbol;Acc:4555]	GPX3	protein_coding	2.44801	1.76551	4.0552	10.3938	11.0631	11.0336
ENSG00000170561	iroquois homeobox 2 [Source:HGNC Symbol;Acc:14359]	IRX2	protein_coding	9.3561	6.61357	10.1041	5.32057	6.22292	6.24681
ENSG00000138131	lysyl oxidase-like 4 [Source:HGNC Symbol;Acc:17171]	LOXL4	protein_coding	8.15654	5.22598	12.457	7.72665	8.61842	8.62925
ENSG00000181061	HIG1 hypoxia inducible domain family, member 1A [Source:HGNC Symbol;Acc:29527]	HIGD1A	protein_coding	1.14127	3.49552	5.62721	7.79285	8.08832	8.0863
ENSG00000166710	beta-2-microglobulin [Source:HGNC Symbol;Acc:914]	B2M	protein_coding	1.37272	1.29584	1.19703	11.9969	12.4116	12.4137
ENSG00000197635	dipeptidyl-peptidase 4 [Source:HGNC Symbol;Acc:3009]	DPP4	protein_coding	7.44519	10.582	10.6077	5.87238	6.78278	6.82293
ENSG00000138193	phospholipase C, epsilon 1 [Source:HGNC Symbol;Acc:17175]	PLCE1	protein_coding	4.88598	5.20021	5.1046	7.75518	8.59023	8.61232
ENSG00000178796	regulatory subunit of type II PKA R-subunit (RIIa) domain containing 1 [Source:HGNC Symbol;Acc:26686]	RIIAD1	protein_coding	1.35073	3.5393	7.47833	3.37659	3.73055	3.73204
ENSG00000173418	N(alpha)-acetyltransferase 20, NatB catalytic subunit [Source:HGNC Symbol;Acc:15908]	NAA20	protein_coding	1.58522	2.52697	2.13483	8.87642	9.3187	9.33355
ENSG00000123416	tubulin, alpha 1b [Source:HGNC Symbol;Acc:18809]	TUBA1B	protein_coding	0.593813	1.84736	2.34415	10.4615	10.5818	10.5728
ENSG00000003989	solute carrier family 7 (cationic amino acid transporter, y+ system), member 2 [Source:HGNC Symbol;Acc:11060]	SLC7A2	protein_coding	1.37221	1.52958	2.25484	8.7538	9.15539	9.13919
ENSG00000115419	glutaminase [Source:HGNC Symbol;Acc:4331]	GLS	protein_coding	3.57054	3.28365	2.16816	8.36047	9.13509	9.16709
ENSG00000257060		RP11-266O8.1	lincRNA	2.71148	2.40831	3.31131	3.46234	4.11252	4.11265
ENSG00000196739	collagen, type XXVII, alpha 1 [Source:HGNC Symbol;Acc:22986]	COL27A1	protein_coding	1.68669	3.40381	3.0792	5.01703	5.49719	5.50755
ENSG00000161939	RNASEK-C17orf49 readthrough [Source:HGNC Symbol;Acc:44419]	RNASEK-C17orf49	protein_coding	0.879218	1.50877	1.39278	5.85228	6.09138	6.09158
ENSG00000152270	phosphodiesterase 3B, cGMP-inhibited [Source:HGNC Symbol;Acc:8779]	PDE3B	protein_coding	1.61864	2.99827	2.8178	6.62191	7.02191	7.04225
ENSG00000269871	Uncharacterized protein [Source:UniProtKB/TrEMBL;Acc:M0QX62]	AC040977.1	protein_coding	0.99745	2.1032	1.61494	6.30553	6.56981	6.58296
ENSG00000219200	ribonuclease, RNase K [Source:HGNC Symbol;Acc:33911]	RNASEK	protein_coding	0.914318	1.68902	1.16866	8.35764	8.60671	8.61976
ENSG00000132429	popeye domain containing 3 [Source:HGNC Symbol;Acc:17649]	POPDC3	protein_coding	3.45185	7.44601	7.46554	3.1064	3.73899	3.75492
ENSG00000089327	FXYD domain containing ion transport regulator 5 [Source:HGNC Symbol;Acc:4029]	FXYD5	protein_coding	5.27445	4.72223	3.01511	6.80799	7.68321	7.7214
ENSG00000078098	fibroblast activation protein, alpha [Source:HGNC Symbol;Acc:3590]	FAP	protein_coding	7.00515	7.68514	3.75662	7.80611	8.66661	8.69511
ENSG00000125354	septin 6 [Source:HGNC Symbol;Acc:15848]	SEPT6	protein_coding	2.15794	6.51452	6.6428	5.20581	5.7303	5.74011
ENSG00000129116	palladin, cytoskeletal associated protein [Source:HGNC Symbol;Acc:17068]	PALLD	protein_coding	1.90548	3.08373	2.27378	7.7874	8.31639	8.34432
ENSG00000043591	adrenoceptor beta 1 [Source:HGNC Symbol;Acc:285]	ADRB1	protein_coding	5.75745	8.43713	8.43797	3.896	4.75192	4.7584
ENSG00000133027	phosphatidylethanolamine N-methyltransferase [Source:HGNC Symbol;Acc:8830]	PEMT	protein_coding	1.2156	5.56145	2.0553	9.25731	9.57153	9.61001
ENSG00000102038	SWI/SNF related, matrix associated, actin dependent regulator of chromatin, subfamily a, member 1 [Source:HGNC Symbol;Acc:11097]	SMARCA1	protein_coding	1.00061	1.82082	2.52105	7.40794	7.6887	7.67719
ENSG00000128271	adenosine A2a receptor [Source:HGNC Symbol;Acc:263]	ADORA2A	protein_coding	8.57921	8.72188	8.7356	4.09715	4.97547	4.99227
ENSG00000102181	CD99 molecule-like 2 [Source:HGNC Symbol;Acc:18237]	CD99L2	protein_coding	1.37706	5.20646	4.07391	8.05559	8.41887	8.44077
ENSG00000115486	gamma-glutamyl carboxylase [Source:HGNC Symbol;Acc:4247]	GGCX	protein_coding	0.645808	2.02757	2.45653	4.90737	4.99811	4.9931
ENSG00000140450	arrestin domain containing 4 [Source:HGNC Symbol;Acc:28087]	ARRDC4	protein_coding	3.98117	4.34488	6.29802	6.47545	7.24615	7.25702
ENSG00000169744	LIM domain binding 2 [Source:HGNC Symbol;Acc:6533]	LDB2	protein_coding	4.061	8.44915	7.51891	3.86616	4.6381	4.63872
ENSG00000150093	integrin, beta 1 (fibronectin receptor, beta polypeptide, antigen CD29 includes MDF2, MSK12) [Source:HGNC Symbol;Acc:6153]	ITGB1	protein_coding	1.10271	1.10531	1.31219	8.78554	9.1256	9.11121
ENSG00000164742	adenylate cyclase 1 (brain) [Source:HGNC Symbol;Acc:232]	ADCY1	protein_coding	1.14439	3.61409	3.21692	5.49108	5.82206	5.83209
ENSG00000155363	Mov10, Moloney leukemia virus 10, homolog (mouse) [Source:HGNC Symbol;Acc:7200]	MOV10	protein_coding	2.71744	3.119	4.0035	4.29396	4.99692	5.03071
ENSG00000101463	synapse differentiation inducing 1 [Source:HGNC Symbol;Acc:15885]	SYNDIG1	protein_coding	8.92379	8.61074	8.57705	4.36387	5.23999	5.25497
ENSG00000115594	interleukin 1 receptor, type I [Source:HGNC Symbol;Acc:5993]	IL1R1	protein_coding	2.63408	4.89908	4.76785	4.71876	5.36897	5.35209
ENSG00000123131	peroxiredoxin 4 [Source:HGNC Symbol;Acc:17169]	PRDX4	protein_coding	0.979325	1.84685	1.94332	7.39489	7.68317	7.6832
ENSG00000018236	contactin 1 [Source:HGNC Symbol;Acc:2171]	CNTN1	protein_coding	1.14268	3.09205	2.44659	7.9508	8.2373	8.25313
ENSG00000125851	proprotein convertase subtilisin/kexin type 2 [Source:HGNC Symbol;Acc:8744]	PCSK2	protein_coding	2.37089	1.99071	1.27847	9.37893	10.0241	10.0455
ENSG00000152093	cripto, FRL-1, cryptic family 1B [Source:HGNC Symbol;Acc:33983]	CFC1B	protein_coding	0.955739	4.21746	3.23607	5.14536	5.39982	5.40967
ENSG00000125430	heparan sulfate (glucosamine) 3-O-sulfotransferase 3B1 [Source:HGNC Symbol;Acc:5198]	HS3ST3B1	protein_coding	4.59091	8.54003	5.2214	6.52572	7.33348	7.34728
ENSG00000145321	group-specific component (vitamin D binding protein) [Source:HGNC Symbol;Acc:4187]	GC	protein_coding	10.8691	11.9973	1.48632	8.59768	9.49893	9.56289
ENSG00000120306	cysteine-rich transmembrane module containing 1 [Source:HGNC Symbol;Acc:30239]	CYSTM1	protein_coding	1.20711	1.33827	0.943954	9.22799	9.58895	9.60503
ENSG00000196090	protein tyrosine phosphatase, receptor type, T [Source:HGNC Symbol;Acc:9682]	PTPRT	protein_coding	4.65204	8.57036	5.85981	4.96548	5.72601	5.73633
ENSG00000149485	fatty acid desaturase 1 [Source:HGNC Symbol;Acc:3574]	FADS1	protein_coding	0.894544	4.22122	2.75833	6.69065	6.85473	6.87575
ENSG00000151136	BTB (POZ) domain containing 11 [Source:HGNC Symbol;Acc:23844]	BTBD11	protein_coding	3.69717	5.75875	6.44439	4.46928	5.23125	5.23822
ENSG00000097096	synapse defective 1, Rho GTPase, homolog 2 (C. elegans) [Source:HGNC Symbol;Acc:25841]	SYDE2	protein_coding	1.38356	1.66628	2.0788	4.45589	4.81318	4.81585
ENSG00000116667	chromosome 1 open reading frame 21 [Source:HGNC Symbol;Acc:15494]	C1orf21	protein_coding	7.5861	7.25341	7.08714	3.25334	4.08217	4.0811

## Sheet: Delta.Signature.Genes
	Description	Associated.Gene.Name	Gene.Biotype	Delta-Beta logFC	Delta-Alpha logFC	Delta-Gamma logFC	Delta-Beta logCPM	Delta-Alpha logCPM	Delta-Gamma logCPM
ENSG00000157005	somatostatin [Source:HGNC Symbol;Acc:11329]	SST	protein_coding	12.2745	12.2263	11.1293	13.0482	13.04	15.9202
ENSG00000152804	hematopoietically expressed homeobox [Source:HGNC Symbol;Acc:4901]	HHEX	protein_coding	11.2165	10.8755	10.8282	4.03975	4.01489	6.80282
ENSG00000114200	butyrylcholinesterase [Source:HGNC Symbol;Acc:983]	BCHE	protein_coding	7.29492	10.3311	11.5264	4.87929	4.67192	7.48645
ENSG00000116678	leptin receptor [Source:HGNC Symbol;Acc:6554]	LEPR	protein_coding	6.25677	5.40587	8.98363	5.51451	5.50614	8.05312
ENSG00000178568	v-erb-b2 avian erythroblastic leukemia viral oncogene homolog 4 [Source:HGNC Symbol;Acc:3432]	ERBB4	protein_coding	9.54761	7.6978	7.26194	3.05361	3.26852	5.7629
ENSG00000236699	Rho guanine nucleotide exchange factor (GEF) 38 [Source:HGNC Symbol;Acc:25968]	ARHGEF38	protein_coding	8.04515	7.2201	7.75062	2.24007	2.28434	4.77772
ENSG00000154175	ABI family, member 3 (NESH) binding protein [Source:HGNC Symbol;Acc:17265]	ABI3BP	protein_coding	6.33032	7.06663	6.98977	3.40585	3.35456	6.04516
ENSG00000166526	zinc finger protein 3 [Source:HGNC Symbol;Acc:13089]	ZNF3	protein_coding	2.19661	1.97155	4.25252	5.56973	5.65144	6.84091
ENSG00000165379	leucine rich repeat and fibronectin type III domain containing 5 [Source:HGNC Symbol;Acc:20360]	LRFN5	protein_coding	8.95572	8.47115	6.72605	3.35102	3.37062	6.04367
ENSG00000164941	integrator complex subunit 8 [Source:HGNC Symbol;Acc:26048]	INTS8	protein_coding	1.70011	2.36235	3.88717	5.78559	5.16745	6.7617
ENSG00000267106	chromosome 19 open reading frame 82 [Source:HGNC Symbol;Acc:27613]	C19orf82	protein_coding	2.99759	3.68886	5.02683	4.48746	4.13788	6.0957
ENSG00000121853	growth hormone secretagogue receptor [Source:HGNC Symbol;Acc:4267]	GHSR	protein_coding	8.14027	7.8705	7.85094	1.56508	1.60907	3.9546
ENSG00000139220	protein tyrosine phosphatase, receptor type, f polypeptide (PTPRF), interacting protein (liprin), alpha 2 [Source:HGNC Symbol;Acc:9246]	PPFIA2	protein_coding	5.27988	9.91914	9.65235	3.54666	3.24991	6.02482
ENSG00000111371	solute carrier family 38, member 1 [Source:HGNC Symbol;Acc:13447]	SLC38A1	protein_coding	2.90069	2.98294	3.49053	3.76537	3.60076	5.42343
ENSG00000169570	DTW domain containing 2 [Source:HGNC Symbol;Acc:19334]	DTWD2	protein_coding	1.59768	1.87978	2.43755	3.22184	2.86908	4.06979
ENSG00000158636	chromosome 11 open reading frame 30 [Source:HGNC Symbol;Acc:18071]	C11orf30	protein_coding	2.38485	2.11241	4.91563	4.30402	4.05603	5.42641
ENSG00000175182	family with sequence similarity 131, member A [Source:HGNC Symbol;Acc:28308]	FAM131A	protein_coding	2.68148	1.78552	2.55592	4.24996	4.62177	5.78897

## Sheet: Gamma.Signature.Genes
	Description	Associated.Gene.Name	Gene.Biotype	Gamma-Beta logFC	Gamma-Alpha logFC	Gamma-Delta logFC	Gamma-Beta logCPM	Gamma-Alpha logCPM	Gamma-Delta logCPM
ENSG00000108849	pancreatic polypeptide [Source:HGNC Symbol;Acc:9327]	PPY	protein_coding	14.6279	13.6603	16.3811	11.9581	11.9674	14.8474
ENSG00000266830		CTD-2008P7.8	lincRNA	8.53693	8.21792	8.10994	1.59298	1.61518	3.96216
ENSG00000140297	glucosaminyl (N-acetyl) transferase 3, mucin type [Source:HGNC Symbol;Acc:4205]	GCNT3	protein_coding	6.05587	3.93773	8.11098	3.92895	4.26296	6.23246
ENSG00000172201	inhibitor of DNA binding 4, dominant negative helix-loop-helix protein [Source:HGNC Symbol;Acc:5363]	ID4	protein_coding	3.25494	3.65788	7.88096	5.49002	5.10005	7.05019
ENSG00000173826	potassium voltage-gated channel, subfamily H (eag-related), member 6 [Source:HGNC Symbol;Acc:18862]	KCNH6	protein_coding	6.32789	2.50901	8.85442	4.21064	5.38191	6.68881
ENSG00000108576	solute carrier family 6 (neurotransmitter transporter), member 4 [Source:HGNC Symbol;Acc:11050]	SLC6A4	protein_coding	4.87556	3.2802	3.56588	5.53868	6.18189	7.95129
ENSG00000137261	KIAA0319 [Source:HGNC Symbol;Acc:21580]	KIAA0319	protein_coding	3.71809	3.02864	6.89182	5.98815	6.07127	7.71678
ENSG00000169231	thrombospondin 3 [Source:HGNC Symbol;Acc:11787]	THBS3	protein_coding	4.33728	3.40384	4.98862	3.29604	3.3029	5.03571
ENSG00000122420	prostaglandin F receptor (FP) [Source:HGNC Symbol;Acc:9600]	PTGFR	protein_coding	7.49745	7.88929	7.78811	1.44943	1.38731	3.61824
ENSG00000005471	ATP-binding cassette, sub-family B (MDR/TAP), member 4 [Source:HGNC Symbol;Acc:45]	ABCB4	protein_coding	5.27265	6.5631	7.05607	1.81805	2.06911	4.00072
ENSG00000107099	dedicator of cytokinesis 8 [Source:HGNC Symbol;Acc:19191]	DOCK8	protein_coding	2.22549	1.44102	2.14801	3.09917	3.50247	4.27556
ENSG00000124214	staufen double-stranded RNA binding protein 1 [Source:HGNC Symbol;Acc:11370]	STAU1	protein_coding	2.72672	2.61544	4.37187	6.91984	6.65421	8.15612
ENSG00000049618	AT rich interactive domain 1B (SWI1-like) [Source:HGNC Symbol;Acc:18040]	ARID1B	protein_coding	1.74101	2.28101	3.29569	6.86921	6.21745	7.68843
ENSG00000142949	protein tyrosine phosphatase, receptor type, F [Source:HGNC Symbol;Acc:9670]	PTPRF	protein_coding	1.66003	2.14724	2.68927	7.36348	6.85907	8.02949
ENSG00000129167	tryptophan hydroxylase 1 [Source:HGNC Symbol;Acc:12008]	TPH1	protein_coding	2.12373	2.40764	2.31533	5.07743	4.83388	6.2694
ENSG00000106069	chimerin 2 [Source:HGNC Symbol;Acc:1944]	CHN2	protein_coding	5.75699	5.34886	2.81797	4.06726	4.17362	6.74967
ENSG00000166398	KIAA0355 [Source:HGNC Symbol;Acc:29016]	KIAA0355	protein_coding	1.75089	1.96395	2.78566	6.12642	5.78199	6.8622
ENSG00000155052	contactin associated protein-like 5 [Source:HGNC Symbol;Acc:18748]	CNTNAP5	protein_coding	11.454	8.11412	7.19421	4.17846	4.03319	6.81379
ENSG00000172831	carboxylesterase 2 [Source:HGNC Symbol;Acc:1864]	CES2	protein_coding	3.27889	2.44241	3.5514	4.60896	4.88586	6.14308
ENSG00000159164	synaptic vesicle glycoprotein 2A [Source:HGNC Symbol;Acc:20566]	SV2A	protein_coding	2.1599	2.15984	3.67824	5.12182	4.89063	6.11046
ENSG00000128641	myosin IB [Source:HGNC Symbol;Acc:7596]	MYO1B	protein_coding	3.07772	1.97217	3.80674	6.29974	6.935	7.93052
ENSG00000140577	CREB regulated transcription coactivator 3 [Source:HGNC Symbol;Acc:26148]	CRTC3	protein_coding	1.87678	2.92923	2.8089	5.31127	4.73456	6.16054
ENSG00000160179	ATP-binding cassette, sub-family G (WHITE), member 1 [Source:HGNC Symbol;Acc:73]	ABCG1	protein_coding	2.60491	2.58316	3.49672	5.20164	4.7651	6.33651
ENSG00000104435	stathmin-like 2 [Source:HGNC Symbol;Acc:10577]	STMN2	protein_coding	1.82222	2.2004	3.19198	8.7682	8.29955	9.51805
ENSG00000129691	ash2 (absent, small, or homeotic)-like (Drosophila) [Source:HGNC Symbol;Acc:744]	ASH2L	protein_coding	1.79706	1.95817	2.66994	5.28209	4.92231	6.06504

## Sheet: Acinar.Signature.Genes
	Description	Associated.Gene.Name	Gene.Biotype	Acinar-Ductal logFC	Acinar-Stellate logFC	Acinar-Ductal logCPM	Acinar-Stellate logCPM
ENSG00000091704	carboxypeptidase A1 (pancreatic) [Source:HGNC Symbol;Acc:2296]	CPA1	protein_coding	16.3115	16.3225	14.2594	14.3264
ENSG00000158516	carboxypeptidase A2 (pancreatic) [Source:HGNC Symbol;Acc:2297]	CPA2	protein_coding	15.5255	14.0026	12.2294	12.3033
ENSG00000204983	protease, serine, 1 (trypsin 1) [Source:HGNC Symbol;Acc:9475]	PRSS1	protein_coding	14.8962	17.8978	15.6017	15.6733
ENSG00000175535	pancreatic lipase [Source:HGNC Symbol;Acc:9155]	PNLIP	protein_coding	13.6921	15.6243	13.0225	13.0939
ENSG00000172023	regenerating islet-derived 1 beta [Source:HGNC Symbol;Acc:9952]	REG1B	protein_coding	15.0031	15.9916	13.4511	13.5011
ENSG00000142789	chymotrypsin-like elastase family, member 3A [Source:HGNC Symbol;Acc:15944]	CELA3A	protein_coding	15.2398	16.2688	14.1807	14.2443
ENSG00000170890	phospholipase A2, group IB (pancreas) [Source:HGNC Symbol;Acc:9030]	PLA2G1B	protein_coding	15.2439	13.3337	12.0228	12.0739
ENSG00000153002	carboxypeptidase B1 (tissue) [Source:HGNC Symbol;Acc:2299]	CPB1	protein_coding	15.7884	15.4862	14.249	14.3226
ENSG00000170835	carboxyl ester lipase [Source:HGNC Symbol;Acc:1848]	CEL	protein_coding	13.1483	13.1783	8.61862	8.69095
ENSG00000169347	glycoprotein 2 (zymogen granule membrane) [Source:HGNC Symbol;Acc:4441]	GP2	protein_coding	10.8173	11.3207	10.9479	11.0203
ENSG00000215704	chymotrypsin-like elastase family, member 2B [Source:HGNC Symbol;Acc:29995]	CELA2B	protein_coding	12.7113	11.4272	9.3048	9.3708
ENSG00000187021	pancreatic lipase-related protein 1 [Source:HGNC Symbol;Acc:9156]	PNLIPRP1	protein_coding	13.3026	12.1546	9.69286	9.76069
ENSG00000137392	colipase, pancreatic [Source:HGNC Symbol;Acc:2085]	CLPS	protein_coding	14.6137	12.993	11.1413	11.2094
ENSG00000142615	chymotrypsin-like elastase family, member 2A [Source:HGNC Symbol;Acc:24609]	CELA2A	protein_coding	12.8219	13.9992	11.9052	11.9692
ENSG00000243480	amylase, alpha 2A (pancreatic) [Source:HGNC Symbol;Acc:477]	AMY2A	protein_coding	13.6315	12.9354	11.0238	11.0981
ENSG00000179751	syncollin [Source:HGNC Symbol;Acc:18442]	SYCN	protein_coding	12.683	11.0772	9.19825	9.25851
ENSG00000168925	chymotrypsinogen B1 [Source:HGNC Symbol;Acc:2521]	CTRB1	protein_coding	15.3899	15.2634	12.9993	13.0712
ENSG00000158525	carboxypeptidase A5 [Source:HGNC Symbol;Acc:15722]	CPA5	protein_coding	7.44688	6.4829	3.88825	3.92836
ENSG00000114204	serpin peptidase inhibitor, clade I (pancpin), member 2 [Source:HGNC Symbol;Acc:8945]	SERPINI2	protein_coding	11.4583	10.782	7.42293	7.47438
ENSG00000162438	chymotrypsin C (caldecrin) [Source:HGNC Symbol;Acc:2523]	CTRC	protein_coding	7.28725	6.49112	10.6985	10.7639
ENSG00000168928	chymotrypsinogen B2 [Source:HGNC Symbol;Acc:2522]	CTRB2	protein_coding	17.2976	15.8851	13.4939	13.5494
ENSG00000163631	albumin [Source:HGNC Symbol;Acc:399]	ALB	protein_coding	11.7306	10.3718	7.9725	8.05374
ENSG00000219073	chymotrypsin-like elastase family, member 3B [Source:HGNC Symbol;Acc:15945]	CELA3B	protein_coding	11.143	14.2483	12.9428	13.0061
ENSG00000115386	regenerating islet-derived 1 alpha [Source:HGNC Symbol;Acc:9951]	REG1A	protein_coding	6.51718	17.5493	15.037	15.0826
ENSG00000136950	actin related protein 2/3 complex, subunit 5-like [Source:HGNC Symbol;Acc:23366]	ARPC5L	protein_coding	6.06408	5.98708	4.55021	4.59045
ENSG00000166825	alanyl (membrane) aminopeptidase [Source:HGNC Symbol;Acc:500]	ANPEP	protein_coding	8.43655	10.8763	7.27229	7.33259
ENSG00000152457	DNA cross-link repair 1C [Source:HGNC Symbol;Acc:17642]	DCLRE1C	protein_coding	5.31379	7.6337	6.79138	6.79898
ENSG00000184674	glutathione S-transferase theta 1 [Source:HGNC Symbol;Acc:4641]	GSTT1	protein_coding	8.3597	8.72323	5.09084	5.01727
ENSG00000125898	family with sequence similarity 110, member A [Source:HGNC Symbol;Acc:16188]	FAM110A	protein_coding	2.49601	2.96519	3.34132	3.33011
ENSG00000240038	amylase, alpha 2B (pancreatic) [Source:HGNC Symbol;Acc:478]	AMY2B	protein_coding	4.35274	7.73207	7.48703	7.52467
ENSG00000237248	long intergenic non-protein coding RNA 987 [Source:HGNC Symbol;Acc:48911]	LINC00987	lincRNA	2.52516	2.84048	4.21305	4.23983

## Sheet: Ductal.Signature.Genes
	Description	Associated.Gene.Name	Gene.Biotype	Ductal-Acinar logFC	Ductal-Stellate logFC	Ductal-Acinar logCPM	Ductal-Stellate logCPM
ENSG00000171345	keratin 19 [Source:HGNC Symbol;Acc:6436]	KRT19	protein_coding	12.3772	13.1756	8.24647	8.93468
ENSG00000137731	FXYD domain containing ion transport regulator 2 [Source:HGNC Symbol;Acc:4026]	FXYD2	protein_coding	10.5077	10.4032	6.39688	7.09016
ENSG00000001626	cystic fibrosis transmembrane conductance regulator (ATP-binding cassette sub-family C, member 7) [Source:HGNC Symbol;Acc:1884]	CFTR	protein_coding	11.9816	14.5889	9.08459	9.78811
ENSG00000137673	matrix metallopeptidase 7 (matrilysin, uterine) [Source:HGNC Symbol;Acc:7174]	MMP7	protein_coding	13.6181	15.9871	10.4971	11.2378
ENSG00000153292	G protein-coupled receptor 110 [Source:HGNC Symbol;Acc:18990]	GPR110	protein_coding	6.81536	4.43954	6.88698	7.5769
ENSG00000019582	CD74 molecule, major histocompatibility complex, class II invariant chain [Source:HGNC Symbol;Acc:1697]	CD74	protein_coding	8.79652	7.44436	6.13327	6.84414
ENSG00000006611	Usher syndrome 1C (autosomal recessive, severe) [Source:HGNC Symbol;Acc:12597]	USH1C	protein_coding	10.3135	8.41336	4.75937	5.42541
ENSG00000007062	prominin 1 [Source:HGNC Symbol;Acc:9454]	PROM1	protein_coding	10.8451	9.88063	5.45448	6.14105
ENSG00000163898	lipase, member H [Source:HGNC Symbol;Acc:18483]	LIPH	protein_coding	4.32466	4.31358	6.19515	6.85046
ENSG00000141934	phosphatidic acid phosphatase type 2C [Source:HGNC Symbol;Acc:9230]	PPAP2C	protein_coding	9.54447	9.49516	4.5454	5.21389
ENSG00000105825	tissue factor pathway inhibitor 2 [Source:HGNC Symbol;Acc:11761]	TFPI2	protein_coding	7.20869	7.59101	5.01137	5.7194
ENSG00000163235	transforming growth factor, alpha [Source:HGNC Symbol;Acc:11765]	TGFA	protein_coding	8.4647	9.29861	4.72489	5.38929
ENSG00000142611	PR domain containing 16 [Source:HGNC Symbol;Acc:14000]	PRDM16	protein_coding	7.9532	8.53261	3.43985	4.0588
ENSG00000122574	WAS/WASL interacting protein family, member 3 [Source:HGNC Symbol;Acc:22004]	WIPF3	protein_coding	9.4665	6.2942	5.016	5.69893
ENSG00000112303	vanin 2 [Source:HGNC Symbol;Acc:12706]	VNN2	protein_coding	9.71676	8.22411	4.48	5.13582
ENSG00000007306	carcinoembryonic antigen-related cell adhesion molecule 7 [Source:HGNC Symbol;Acc:1819]	CEACAM7	protein_coding	12.0133	11.5486	7.23434	7.90851
ENSG00000101443	WAP four-disulfide core domain 2 [Source:HGNC Symbol;Acc:15939]	WFDC2	protein_coding	8.75326	9.09243	3.99243	4.68912
ENSG00000149260	calpain 5 [Source:HGNC Symbol;Acc:1482]	CAPN5	protein_coding	7.92019	9.62954	4.35023	4.99301
ENSG00000163293	NIPA-like domain containing 1 [Source:HGNC Symbol;Acc:27194]	NIPAL1	protein_coding	5.34595	4.16704	4.18385	4.79295
ENSG00000187720	thrombospondin, type I, domain containing 4 [Source:HGNC Symbol;Acc:25835]	THSD4	protein_coding	7.17001	9.31466	4.89287	5.54051
ENSG00000143412	annexin A9 [Source:HGNC Symbol;Acc:547]	ANXA9	protein_coding	8.47351	9.96915	4.64156	5.32052
ENSG00000196260	surfactant associated 2 [Source:HGNC Symbol;Acc:18386]	SFTA2	protein_coding	8.57678	7.89223	3.40221	4.04071
ENSG00000163082	sphingosine-1-phosphate phosphatase 2 [Source:HGNC Symbol;Acc:19953]	SGPP2	protein_coding	6.02456	6.09662	2.95899	3.56305
ENSG00000112414	G protein-coupled receptor 126 [Source:HGNC Symbol;Acc:13841]	GPR126	protein_coding	10.0338	9.49669	4.80829	5.49038
ENSG00000180730	shisa family member 2 [Source:HGNC Symbol;Acc:20366]	SHISA2	protein_coding	10.4437	12.1617	6.79805	7.54135
ENSG00000163975	antigen p97 (melanoma associated) identified by monoclonal antibodies 133.2 and 96.5 [Source:HGNC Symbol;Acc:7037]	MFI2	protein_coding	6.6441	7.34724	2.82539	3.43341
ENSG00000166979	eva-1 homolog C (C. elegans) [Source:HGNC Symbol;Acc:13239]	EVA1C	protein_coding	9.0138	7.65008	4.07865	4.73172
ENSG00000090382	lysozyme [Source:HGNC Symbol;Acc:6740]	LYZ	protein_coding	3.55466	3.29005	7.6927	8.26972
ENSG00000170927	polycystic kidney and hepatic disease 1 (autosomal recessive) [Source:HGNC Symbol;Acc:9016]	PKHD1	protein_coding	6.68821	7.84108	3.92869	4.60006
ENSG00000197632	serpin peptidase inhibitor, clade B (ovalbumin), member 2 [Source:HGNC Symbol;Acc:8584]	SERPINB2	protein_coding	10.8436	10.4096	5.62113	6.3422
ENSG00000112299	vanin 1 [Source:HGNC Symbol;Acc:12705]	VNN1	protein_coding	8.1743	10.4026	5.96644	6.66093
ENSG00000204385	solute carrier family 44, member 4 [Source:HGNC Symbol;Acc:13941]	SLC44A4	protein_coding	4.4761	4.32759	5.11098	5.73396
ENSG00000136943	cathepsin V [Source:HGNC Symbol;Acc:2538]	CTSV	protein_coding	8.43321	10.7983	5.5429	6.2101
ENSG00000117632	stathmin 1 [Source:HGNC Symbol;Acc:6510]	STMN1	protein_coding	4.1333	4.28726	6.89427	7.69753
ENSG00000092421	sema domain, transmembrane domain (TM), and cytoplasmic domain, (semaphorin) 6A [Source:HGNC Symbol;Acc:10738]	SEMA6A	protein_coding	6.74046	6.56341	5.7776	6.46413
ENSG00000171124	fucosyltransferase 3 (galactoside 3(4)-L-fucosyltransferase, Lewis blood group) [Source:HGNC Symbol;Acc:4014]	FUT3	protein_coding	8.18883	8.84226	4.355	4.99272
ENSG00000146674	insulin-like growth factor binding protein 3 [Source:HGNC Symbol;Acc:5472]	IGFBP3	protein_coding	8.5999	8.69809	3.71792	4.36942
ENSG00000146038	doublecortin domain containing 2 [Source:HGNC Symbol;Acc:18141]	DCDC2	protein_coding	6.02604	11.0977	6.54829	7.22939
ENSG00000235162	chromosome 12 open reading frame 75 [Source:HGNC Symbol;Acc:35164]	C12orf75	protein_coding	6.09051	6.32248	4.03525	4.70987
ENSG00000023171	GRAM domain containing 1B [Source:HGNC Symbol;Acc:29214]	GRAMD1B	protein_coding	6.84678	6.38665	2.32936	2.89989
ENSG00000131941	rhophilin, Rho GTPase binding protein 2 [Source:HGNC Symbol;Acc:19974]	RHPN2	protein_coding	6.24266	7.49884	5.57136	6.24905
ENSG00000068078	fibroblast growth factor receptor 3 [Source:HGNC Symbol;Acc:3690]	FGFR3	protein_coding	7.55376	8.51117	3.34247	3.9909
ENSG00000015153	YY1 associated factor 2 [Source:HGNC Symbol;Acc:17363]	YAF2	protein_coding	3.76319	4.81767	4.61238	5.28365
ENSG00000184956	mucin 6, oligomeric mucus/gel-forming [Source:HGNC Symbol;Acc:7517]	MUC6	protein_coding	8.4368	9.72356	5.22125	5.94079
ENSG00000198515	cyclic nucleotide gated channel alpha 1 [Source:HGNC Symbol;Acc:2148]	CNGA1	protein_coding	5.14495	6.94046	2.9355	3.52973
ENSG00000257594	UDP-N-acetyl-alpha-D-galactosamine:polypeptide N-acetylgalactosaminyltransferase 4 (GalNAc-T4) [Source:HGNC Symbol;Acc:4126]	GALNT4	protein_coding	4.09457	3.63565	2.9224	3.53089
ENSG00000023445	baculoviral IAP repeat containing 3 [Source:HGNC Symbol;Acc:591]	BIRC3	protein_coding	6.11433	9.50205	7.71124	8.3418
ENSG00000070190	dual adaptor of phosphotyrosine and 3-phosphoinositides [Source:HGNC Symbol;Acc:16500]	DAPP1	protein_coding	3.30831	4.11911	5.46279	6.1236
ENSG00000196975	annexin A4 [Source:HGNC Symbol;Acc:542]	ANXA4	protein_coding	3.03129	3.53852	8.9484	9.54493
ENSG00000168803	adenosine deaminase-like [Source:HGNC Symbol;Acc:31853]	ADAL	protein_coding	6.13966	5.17186	3.10545	3.70616
ENSG00000080493	solute carrier family 4 (sodium bicarbonate cotransporter), member 4 [Source:HGNC Symbol;Acc:11030]	SLC4A4	protein_coding	5.7039	10.6958	8.0174	8.68509
ENSG00000163075	Primary ciliary dyskinesia protein 1 [Source:UniProtKB/Swiss-Prot;Acc:Q4G0U5]	PCDP1	protein_coding	2.9899	3.8253	4.36636	4.95905
ENSG00000162777	DENN/MADD domain containing 2D [Source:HGNC Symbol;Acc:26192]	DENND2D	protein_coding	7.98877	9.71249	4.62455	5.27797
ENSG00000124875	chemokine (C-X-C motif) ligand 6 [Source:HGNC Symbol;Acc:10643]	CXCL6	protein_coding	4.51279	9.4937	4.0297	4.73088
ENSG00000088367	erythrocyte membrane protein band 4.1-like 1 [Source:HGNC Symbol;Acc:3378]	EPB41L1	protein_coding	4.34867	5.63293	4.63019	5.23746
ENSG00000085831	tetratricopeptide repeat domain 39A [Source:HGNC Symbol;Acc:18657]	TTC39A	protein_coding	5.25461	6.85151	4.49287	5.1275
ENSG00000119547	one cut homeobox 2 [Source:HGNC Symbol;Acc:8139]	ONECUT2	protein_coding	6.88795	12.0792	7.38391	8.04954
ENSG00000169856	one cut homeobox 1 [Source:HGNC Symbol;Acc:8138]	ONECUT1	protein_coding	4.17464	9.26669	3.92504	4.56508
ENSG00000104450	sperm associated antigen 1 [Source:HGNC Symbol;Acc:11212]	SPAG1	protein_coding	6.02509	9.73771	4.562	5.19693
ENSG00000118946	protocadherin 17 [Source:HGNC Symbol;Acc:14267]	PCDH17	protein_coding	6.38217	7.70655	3.61298	4.25705
ENSG00000106686	spermatogenesis associated 6-like [Source:HGNC Symbol;Acc:25472]	SPATA6L	protein_coding	3.18467	3.52453	5.22235	5.57563
ENSG00000161921	chemokine (C-X-C motif) ligand 16 [Source:HGNC Symbol;Acc:16642]	CXCL16	protein_coding	3.46039	6.0331	6.28908	6.87914

## Sheet: Stellate.Signature.Genes
	Description	Associated.Gene.Name	Gene.Biotype	Stellate-Acinar logFC	Stellate-Ductal logFC	Stellate-Acinar logCPM	Stellate-Ductal logCPM
ENSG00000168542	collagen, type III, alpha 1 [Source:HGNC Symbol;Acc:2201]	COL3A1	protein_coding	13.7173	13.8033	9.744	10.4069
ENSG00000182492	biglycan [Source:HGNC Symbol;Acc:1044]	BGN	protein_coding	11.946	13.1854	8.58732	9.23464
ENSG00000115461	insulin-like growth factor binding protein 5 [Source:HGNC Symbol;Acc:5474]	IGFBP5	protein_coding	13.877	13.7286	8.64738	9.31291
ENSG00000139329	lumican [Source:HGNC Symbol;Acc:6724]	LUM	protein_coding	13.0185	12.7449	8.89355	9.53967
ENSG00000113721	platelet-derived growth factor receptor, beta polypeptide [Source:HGNC Symbol;Acc:8804]	PDGFRB	protein_coding	11.5514	11.6015	7.18753	7.82867
ENSG00000130635	collagen, type V, alpha 1 [Source:HGNC Symbol;Acc:2209]	COL5A1	protein_coding	12.4093	11.5934	6.57622	7.21186
ENSG00000151617	endothelin receptor type A [Source:HGNC Symbol;Acc:3179]	EDNRA	protein_coding	12.1049	11.4698	5.84887	6.45422
ENSG00000108821	collagen, type I, alpha 1 [Source:HGNC Symbol;Acc:2197]	COL1A1	protein_coding	11.845	9.37561	10.1957	10.844
ENSG00000038427	versican [Source:HGNC Symbol;Acc:2464]	VCAN	protein_coding	13.8101	12.8313	7.24562	7.86732
ENSG00000189184	protocadherin 18 [Source:HGNC Symbol;Acc:14268]	PCDH18	protein_coding	11.5843	9.79737	4.52253	5.14181
ENSG00000169604	anthrax toxin receptor 1 [Source:HGNC Symbol;Acc:21014]	ANTXR1	protein_coding	10.2614	7.80847	5.39997	6.08124
ENSG00000136235	glycoprotein (transmembrane) nmb [Source:HGNC Symbol;Acc:4462]	GPNMB	protein_coding	7.79385	7.85549	8.93778	9.63694
ENSG00000204262	collagen, type V, alpha 2 [Source:HGNC Symbol;Acc:2210]	COL5A2	protein_coding	10.4638	12.2895	6.97202	7.62497
ENSG00000204291	collagen, type XV, alpha 1 [Source:HGNC Symbol;Acc:2192]	COL15A1	protein_coding	9.15632	11.4946	6.80049	7.46353
ENSG00000269636		AC010441.1	protein_coding	11.7945	10.3554	4.92544	5.52913
ENSG00000122176	fibromodulin [Source:HGNC Symbol;Acc:3774]	FMOD	protein_coding	11.84	13.0973	8.11203	8.73979
ENSG00000011028	mannose receptor, C type 2 [Source:HGNC Symbol;Acc:16875]	MRC2	protein_coding	8.29035	7.61127	2.16579	2.78569
ENSG00000123610	tumor necrosis factor, alpha-induced protein 6 [Source:HGNC Symbol;Acc:11898]	TNFAIP6	protein_coding	10.3856	9.15935	7.94668	8.61373
ENSG00000115414	fibronectin 1 [Source:HGNC Symbol;Acc:3778]	FN1	protein_coding	8.4248	9.67937	10.0934	10.7947
ENSG00000123384	low density lipoprotein receptor-related protein 1 [Source:HGNC Symbol;Acc:6692]	LRP1	protein_coding	7.94939	6.3249	4.20765	4.84042
ENSG00000101335	myosin, light chain 9, regulatory [Source:HGNC Symbol;Acc:15754]	MYL9	protein_coding	8.1307	7.71548	2.36486	2.9462
ENSG00000140545	milk fat globule-EGF factor 8 protein [Source:HGNC Symbol;Acc:7036]	MFGE8	protein_coding	9.11419	10.1366	4.97977	5.69768
ENSG00000071967	cytochrome b reductase 1 [Source:HGNC Symbol;Acc:20797]	CYBRD1	protein_coding	5.75009	4.14799	4.60785	5.35892
ENSG00000131634	transmembrane protein 204 [Source:HGNC Symbol;Acc:14158]	TMEM204	protein_coding	11.4232	11.1008	5.45827	6.15601
ENSG00000125869	lysosomal-associated membrane protein family, member 5 [Source:HGNC Symbol;Acc:16097]	LAMP5	protein_coding	12.4848	10.2249	5.42844	6.04908
ENSG00000106333	procollagen C-endopeptidase enhancer [Source:HGNC Symbol;Acc:8738]	PCOLCE	protein_coding	9.97275	10.4065	5.00936	5.70737
ENSG00000157227	matrix metallopeptidase 14 (membrane-inserted) [Source:HGNC Symbol;Acc:7160]	MMP14	protein_coding	7.58526	4.0568	4.53416	5.32603
ENSG00000174099	methionine sulfoxide reductase B3 [Source:HGNC Symbol;Acc:27375]	MSRB3	protein_coding	6.3029	2.91745	4.1981	4.9088
ENSG00000122786	caldesmon 1 [Source:HGNC Symbol;Acc:1441]	CALD1	protein_coding	9.55858	3.91353	8.58602	9.39539
ENSG00000154096	Thy-1 cell surface antigen [Source:HGNC Symbol;Acc:11801]	THY1	protein_coding	11.0693	11.6408	6.37516	6.98479
ENSG00000183098	glypican 6 [Source:HGNC Symbol;Acc:4454]	GPC6	protein_coding	10.0447	11.0545	5.90513	6.59511
ENSG00000166147	fibrillin 1 [Source:HGNC Symbol;Acc:3603]	FBN1	protein_coding	8.71845	7.75091	6.33748	6.95808
ENSG00000150995	inositol 1,4,5-trisphosphate receptor, type 1 [Source:HGNC Symbol;Acc:6180]	ITPR1	protein_coding	12.331	8.67348	5.3761	6.18395
ENSG00000187479	chromosome 11 open reading frame 96 [Source:HGNC Symbol;Acc:38675]	C11orf96	protein_coding	8.97532	9.13071	3.60932	4.22106
ENSG00000091656	zinc finger homeobox 4 [Source:HGNC Symbol;Acc:30939]	ZFHX4	protein_coding	9.66264	9.39151	3.91114	4.5086
ENSG00000087303	nidogen 2 (osteonidogen) [Source:HGNC Symbol;Acc:13389]	NID2	protein_coding	9.19268	10.0729	5.85669	6.51492
ENSG00000182667	neurotrimin [Source:HGNC Symbol;Acc:17941]	NTM	protein_coding	10.4865	10.4154	4.95209	5.54417
ENSG00000110237	Rho guanine nucleotide exchange factor (GEF) 17 [Source:HGNC Symbol;Acc:21726]	ARHGEF17	protein_coding	10.669	7.99971	5.28379	5.90714
ENSG00000078098	fibroblast activation protein, alpha [Source:HGNC Symbol;Acc:3590]	FAP	protein_coding	8.92765	11.7798	7.68873	8.34488
ENSG00000074181	notch 3 [Source:HGNC Symbol;Acc:7883]	NOTCH3	protein_coding	6.14444	4.67002	5.99716	6.66413
ENSG00000181104	coagulation factor II (thrombin) receptor [Source:HGNC Symbol;Acc:3537]	F2R	protein_coding	5.35798	4.08352	7.11869	7.81987
ENSG00000122877	early growth response 2 [Source:HGNC Symbol;Acc:3239]	EGR2	protein_coding	11.5032	10.3579	4.91262	5.53497
ENSG00000011465	decorin [Source:HGNC Symbol;Acc:2705]	DCN	protein_coding	7.80723	7.87813	7.12455	7.80733
ENSG00000164932	collagen triple helix repeat containing 1 [Source:HGNC Symbol;Acc:18831]	CTHRC1	protein_coding	9.20586	6.63237	2.93417	3.59211
ENSG00000182326	complement component 1, s subcomponent [Source:HGNC Symbol;Acc:1247]	C1S	protein_coding	9.25321	9.12743	8.027	8.7076
ENSG00000176170	sphingosine kinase 1 [Source:HGNC Symbol;Acc:11240]	SPHK1	protein_coding	10.4387	7.17542	5.21004	5.87219
ENSG00000138795	lymphoid enhancer-binding factor 1 [Source:HGNC Symbol;Acc:6551]	LEF1	protein_coding	8.8148	8.57853	3.84936	4.44719
ENSG00000174807	CD248 molecule, endosialin [Source:HGNC Symbol;Acc:18219]	CD248	protein_coding	10.4127	9.66123	4.12653	4.76501
ENSG00000124216	snail family zinc finger 1 [Source:HGNC Symbol;Acc:11128]	SNAI1	protein_coding	10.6718	10.1694	4.59709	5.24372
ENSG00000099998	gamma-glutamyltransferase 5 [Source:HGNC Symbol;Acc:4260]	GGT5	protein_coding	8.28858	8.78735	3.54106	4.18106
ENSG00000170624	sarcoglycan, delta (35kDa dystrophin-associated glycoprotein) [Source:HGNC Symbol;Acc:10807]	SGCD	protein_coding	9.57639	9.3582	4.79158	5.41635
ENSG00000165633	V-set and transmembrane domain containing 4 [Source:HGNC Symbol;Acc:26470]	VSTM4	protein_coding	6.41426	5.37161	5.92589	6.60091
ENSG00000100968	nuclear factor of activated T-cells, cytoplasmic, calcineurin-dependent 4 [Source:HGNC Symbol;Acc:7778]	NFATC4	protein_coding	9.83847	8.3546	3.16357	3.78066
ENSG00000161544	cytoglobin [Source:HGNC Symbol;Acc:16505]	CYGB	protein_coding	7.72579	8.60209	3.53545	4.17305
ENSG00000142552	reticulocalbin 3, EF-hand calcium binding domain [Source:HGNC Symbol;Acc:21145]	RCN3	protein_coding	7.28283	8.38191	3.21526	3.80988
ENSG00000159674	spondin 2, extracellular matrix protein [Source:HGNC Symbol;Acc:11253]	SPON2	protein_coding	5.6228	5.29154	5.66456	6.26751
ENSG00000151388	ADAM metallopeptidase with thrombospondin type 1 motif, 12 [Source:HGNC Symbol;Acc:14605]	ADAMTS12	protein_coding	9.26525	10.3777	5.40768	6.06342
ENSG00000176788	brain abundant, membrane attached signal protein 1 [Source:HGNC Symbol;Acc:957]	BASP1	protein_coding	7.23902	7.45795	2.3342	2.90754
ENSG00000149090	peptidase domain containing associated with muscle regeneration 1 [Source:HGNC Symbol;Acc:24554]	PAMR1	protein_coding	9.04111	8.67367	3.25386	3.83571
ENSG00000176971	fin bud initiation factor homolog (zebrafish) [Source:HGNC Symbol;Acc:33747]	FIBIN	protein_coding	12.028	11.0524	5.58396	6.19648
ENSG00000111799	collagen, type XII, alpha 1 [Source:HGNC Symbol;Acc:2188]	COL12A1	protein_coding	8.04368	8.80481	4.4748	5.20365
ENSG00000158292	G protein-coupled receptor 153 [Source:HGNC Symbol;Acc:23618]	GPR153	protein_coding	8.89699	9.4568	4.14465	4.83825
ENSG00000043462	lymphocyte cytosolic protein 2 (SH2 domain containing leukocyte protein of 76kDa) [Source:HGNC Symbol;Acc:6529]	LCP2	protein_coding	7.86559	9.19304	4.22281	4.91553
ENSG00000164692	collagen, type I, alpha 2 [Source:HGNC Symbol;Acc:2198]	COL1A2	protein_coding	9.83541	12.1425	10.1353	10.7877
ENSG00000050165	dickkopf WNT signaling pathway inhibitor 3 [Source:HGNC Symbol;Acc:2893]	DKK3	protein_coding	7.24409	6.69439	7.16915	7.86326
ENSG00000103742	immunoglobulin superfamily, DCC subclass, member 4 [Source:HGNC Symbol;Acc:13770]	IGDCC4	protein_coding	8.60661	9.07466	3.80148	4.44283
ENSG00000142173	collagen, type VI, alpha 2 [Source:HGNC Symbol;Acc:2212]	COL6A2	protein_coding	7.15582	9.89119	5.20337	5.86702
ENSG00000007237	growth arrest-specific 7 [Source:HGNC Symbol;Acc:4169]	GAS7	protein_coding	6.20796	5.52106	3.75617	4.3905
ENSG00000187688	transient receptor potential cation channel, subfamily V, member 2 [Source:HGNC Symbol;Acc:18082]	TRPV2	protein_coding	6.98801	7.16182	2.03897	2.65511
ENSG00000103241	forkhead box F1 [Source:HGNC Symbol;Acc:3809]	FOXF1	protein_coding	8.12135	8.24352	3.65546	4.32693
ENSG00000114251	wingless-type MMTV integration site family, member 5A [Source:HGNC Symbol;Acc:12784]	WNT5A	protein_coding	7.04946	11.6454	7.95553	8.64648
ENSG00000145423	secreted frizzled-related protein 2 [Source:HGNC Symbol;Acc:10777]	SFRP2	protein_coding	10.1993	13.3529	7.74583	8.36839
ENSG00000106819	asporin [Source:HGNC Symbol;Acc:14872]	ASPN	protein_coding	10.3086	11.3908	5.99156	6.6023
ENSG00000087245	matrix metallopeptidase 2 (gelatinase A, 72kDa gelatinase, 72kDa type IV collagenase) [Source:HGNC Symbol;Acc:7166]	MMP2	protein_coding	9.28142	13.2598	7.71708	8.35406
ENSG00000168268	5'-nucleotidase domain containing 2 [Source:HGNC Symbol;Acc:25717]	NT5DC2	protein_coding	7.79442	8.80084	4.42785	5.15821
ENSG00000144810	collagen, type VIII, alpha 1 [Source:HGNC Symbol;Acc:2215]	COL8A1	protein_coding	5.05216	4.59739	6.58169	7.25277
ENSG00000132530	XIAP associated factor 1 [Source:HGNC Symbol;Acc:30932]	XAF1	protein_coding	3.97659	3.34711	6.22494	7.01656
ENSG00000118257	neuropilin 2 [Source:HGNC Symbol;Acc:8005]	NRP2	protein_coding	3.85999	3.7928	4.09447	4.75203
ENSG00000171444	mutated in colorectal cancers [Source:HGNC Symbol;Acc:6935]	MCC	protein_coding	5.23612	3.36192	4.22384	4.97588
ENSG00000196569	laminin, alpha 2 [Source:HGNC Symbol;Acc:6482]	LAMA2	protein_coding	7.6482	9.5851	4.90268	5.5111
ENSG00000205659	lin-52 homolog (C. elegans) [Source:HGNC Symbol;Acc:19856]	LIN52	protein_coding	5.83606	3.32715	3.45966	4.21175
ENSG00000004399	plexin D1 [Source:HGNC Symbol;Acc:9107]	PLXND1	protein_coding	8.29498	8.67213	3.17893	3.84134
ENSG00000129009	immunoglobulin superfamily containing leucine-rich repeat [Source:HGNC Symbol;Acc:6133]	ISLR	protein_coding	8.00663	9.71263	4.90568	5.54319
ENSG00000253864		AC131025.8	lincRNA	7.12244	5.41142	3.01029	3.61934
ENSG00000198700	importin 9 [Source:HGNC Symbol;Acc:19425]	IPO9	protein_coding	4.70048	3.71748	6.8444	7.50541
ENSG00000196562	sulfatase 2 [Source:HGNC Symbol;Acc:20392]	SULF2	protein_coding	8.06821	6.14669	5.58177	6.23531
ENSG00000106571	GLI family zinc finger 3 [Source:HGNC Symbol;Acc:4319]	GLI3	protein_coding	7.10693	8.77387	3.97059	4.63729
ENSG00000135919	serpin peptidase inhibitor, clade E (nexin, plasminogen activator inhibitor type 1), member 2 [Source:HGNC Symbol;Acc:8951]	SERPINE2	protein_coding	3.90428	3.60835	5.61018	6.332
ENSG00000166770	ZNF667 antisense RNA 1 (head to head) [Source:HGNC Symbol;Acc:44321]	ZNF667-AS1	lincRNA	8.38313	6.90666	4.60311	5.57818
ENSG00000087086	ferritin, light polypeptide [Source:HGNC Symbol;Acc:3999]	FTL	protein_coding	2.80439	3.95058	14.3498	14.8178
ENSG00000103196	cysteine-rich secretory protein LCCL domain containing 2 [Source:HGNC Symbol;Acc:25248]	CRISPLD2	protein_coding	5.90773	6.57919	7.84907	8.51778
ENSG00000161381	plexin domain containing 1 [Source:HGNC Symbol;Acc:20945]	PLXDC1	protein_coding	6.53497	7.32103	6.18518	6.78265
ENSG00000165219	GTPase activating protein and VPS9 domains 1 [Source:HGNC Symbol;Acc:23375]	GAPVD1	protein_coding	5.17624	3.60629	6.70737	7.57985
ENSG00000166482	microfibrillar-associated protein 4 [Source:HGNC Symbol;Acc:7035]	MFAP4	protein_coding	10.1744	11.8924	6.33226	6.95625
ENSG00000106366	serpin peptidase inhibitor, clade E (nexin, plasminogen activator inhibitor type 1), member 1 [Source:HGNC Symbol;Acc:8583]	SERPINE1	protein_coding	6.37988	6.37058	7.58266	8.22846
ENSG00000183722	lipoma HMGIC fusion partner [Source:HGNC Symbol;Acc:6586]	LHFP	protein_coding	8.21261	10.8918	5.31331	5.95056
ENSG00000174705	SH3 and PX domains 2B [Source:HGNC Symbol;Acc:29242]	SH3PXD2B	protein_coding	6.95307	10.3821	6.30597	6.94676
ENSG00000213949	integrin, alpha 1 [Source:HGNC Symbol;Acc:6134]	ITGA1	protein_coding	4.99709	5.45462	7.66349	8.32158
ENSG00000163359	collagen, type VI, alpha 3 [Source:HGNC Symbol;Acc:2213]	COL6A3	protein_coding	2.58449	2.7753	10.4021	10.9866
ENSG00000154864	piezo-type mechanosensitive ion channel component 2 [Source:HGNC Symbol;Acc:26270]	PIEZO2	protein_coding	6.26093	10.2671	6.08497	6.72216
ENSG00000169554	zinc finger E-box binding homeobox 2 [Source:HGNC Symbol;Acc:14881]	ZEB2	protein_coding	7.40602	12.1516	6.59509	7.24133
ENSG00000111341	matrix Gla protein [Source:HGNC Symbol;Acc:7060]	MGP	protein_coding	7.14856	6.94013	7.19685	7.77279
ENSG00000090581	N-acetylglucosamine-1-phosphate transferase, gamma subunit [Source:HGNC Symbol;Acc:23026]	GNPTG	protein_coding	3.25175	2.09659	5.39596	6.22539
ENSG00000213699	solute carrier family 35, member F6 [Source:HGNC Symbol;Acc:26055]	SLC35F6	protein_coding	3.54897	3.77104	7.56009	8.23721
ENSG00000079308	tensin 1 [Source:HGNC Symbol;Acc:11973]	TNS1	protein_coding	6.12136	5.30732	6.438	7.03861
ENSG00000058056	ubiquitin specific peptidase 13 (isopeptidase T-3) [Source:HGNC Symbol;Acc:12611]	USP13	protein_coding	5.32427	4.80559	4.02881	4.65217
ENSG00000166033	HtrA serine peptidase 1 [Source:HGNC Symbol;Acc:9476]	HTRA1	protein_coding	7.77907	6.51981	4.57598	5.24655
ENSG00000106624	AE binding protein 1 [Source:HGNC Symbol;Acc:303]	AEBP1	protein_coding	7.01848	11.7293	6.23534	6.88376
ENSG00000136859	angiopoietin-like 2 [Source:HGNC Symbol;Acc:490]	ANGPTL2	protein_coding	4.49229	10.4589	6.07332	6.74941
