# Supplementary material for: Single-cell transcriptomes identify human islet cell signatures and reveal cell-type–specific expression changes in type 2 diabetes
Source: Genome Res. 2017 Feb;27(2):208–22. doi: 10.1101/gr.212720.116 (PMC5287227; doi:10.1101/gr.212720.116)
Supplement: Supplemental Material [file supp_gr.212720.116_Supplemental_Table_S8.xlsx]

## Sheet: Alpha.downregulated.pathways
Supplemental_Table_S8: Gene set enrichment analysis reveals pathways exclusively upregulated in alpha and beta cells.
Tables containing lists of upregulated and downregulated KEGG pathways in each islet cell type after gene set enrichment analysis using Generally Applicable Gene-set Enrichment (GAGE). Each table contains the KEGG pathway name and identifier, geometric mean of the individual p-values from multiple single array based gene set tests (p.geomean), mean of the individual statistics from multiple singl…
KEGG Pathway	p.geomean	stat.mean	p.val	q.val	set.size
hsa03010 Ribosome	0.00169902	-2.36313	2.95e-160	6.26e-158	88
hsa04950 Maturity onset diabetes of the young	0.0816907	-1.34414	1.87e-53	1.99e-51	22
hsa00190 Oxidative phosphorylation	0.0849573	-0.829817	1.91e-22	1.35e-20	126
hsa04140 Regulation of autophagy	0.199375	-0.749614	2.72e-18	1.44e-16	23
hsa03013 RNA transport	0.155297	-0.722505	1.45e-17	6.14e-16	143
hsa04150 mTOR signaling pathway	0.203209	-0.711124	5.61e-17	1.98e-15	52
hsa04960 Aldosterone-regulated sodium reabsorption	0.211009	-0.699989	1.86e-16	5.65e-15	40
hsa04930 Type II diabetes mellitus	0.210989	-0.687785	5.67e-16	1.5e-14	44
hsa03060 Protein export	0.166009	-0.69007	1.59e-15	3.76e-14	23
hsa05012 Parkinson's disease	0.124687	-0.645697	2.37e-14	5.03e-13	126
hsa05110 Vibrio cholerae infection	0.207397	-0.568381	1.92e-11	3.71e-10	50
hsa00650 Butanoate metabolism	0.254068	-0.512507	1.42e-09	2.51e-08	29
hsa04966 Collecting duct acid secretion	0.25889	-0.454651	7.61e-08	1.23e-06	23
hsa05215 Prostate cancer	0.278141	-0.447677	8.09e-08	1.23e-06	86
hsa04141 Protein processing in endoplasmic reticulum	0.175823	-0.445825	9.48e-08	1.34e-06	161
hsa05010 Alzheimer's disease	0.187062	-0.433984	1.89e-07	2.51e-06	156
hsa03050 Proteasome	0.190388	-0.434292	2.56e-07	3.19e-06	41
hsa04910 Insulin signaling pathway	0.282595	-0.396974	1.66e-06	1.96e-05	126
hsa00071 Fatty acid metabolism	0.274278	-0.395935	2.12e-06	2.36e-05	40
hsa04973 Carbohydrate digestion and absorption	0.301244	-0.38114	4.5e-06	4.77e-05	37
hsa03018 RNA degradation	0.246385	-0.378119	5.26e-06	5.31e-05	68
hsa04962 Vasopressin-regulated water reabsorption	0.287029	-0.365625	1.07e-05	0.000103559	39
hsa04310 Wnt signaling pathway	0.291247	-0.359593	1.26e-05	0.000116087	133
hsa05120 Epithelial cell signaling in Helicobacter pylori infection	0.282701	-0.349918	2.24e-05	0.000197541	62
hsa03040 Spliceosome	0.241265	-0.321129	8.64e-05	0.000732856	125
hsa00280 Valine, leucine and isoleucine degradation	0.276459	-0.321028	9.72e-05	0.000792362	44
hsa04114 Oocyte meiosis	0.30457	-0.315597	0.000110393	0.000866789	104
hsa05016 Huntington's disease	0.2061	-0.301853	0.000201833	0.00152816	175
hsa04260 Cardiac muscle contraction	0.307443	-0.294584	0.000289818	0.00211867	69
hsa04810 Regulation of actin cytoskeleton	0.310481	-0.271378	0.000732741	0.00517804	194
hsa00310 Lysine degradation	0.316402	-0.263983	0.00106777	0.0073022	43
hsa04520 Adherens junction	0.30194	-0.25682	0.00136068	0.00901454	72
hsa04914 Progesterone-mediated oocyte maturation	0.341476	-0.254053	0.00147623	0.00948367	83
hsa04666 Fc gamma R-mediated phagocytosis	0.354069	-0.238683	0.00259393	0.0161739	91
hsa03008 Ribosome biogenesis in eukaryotes	0.287157	-0.236682	0.00289373	0.0175277	73
hsa04540 Gap junction	0.346288	-0.223093	0.00452703	0.0262243	80
hsa05323 Rheumatoid arthritis	0.338985	-0.222922	0.00457688	0.0262243	73
hsa05211 Renal cell carcinoma	0.3327	-0.212237	0.00657562	0.036685	70
hsa04710 Circadian rhythm - mammal	0.343669	-0.211317	0.00732699	0.0390949	22
hsa04340 Hedgehog signaling pathway	0.368958	-0.208566	0.00745512	0.0390949	43
hsa00010 Glycolysis / Gluconeogenesis	0.315219	-0.208462	0.0075608	0.0390949	57
hsa00051 Fructose and mannose metabolism	0.352165	-0.204869	0.00870686	0.0439489	32
hsa04070 Phosphatidylinositol signaling system	0.361819	-0.195112	0.0112484	0.0554574	71
hsa04730 Long-term depression	0.356613	-0.193071	0.0120664	0.0581382	64
hsa00410 beta-Alanine metabolism	0.334103	-0.188406	0.0150185	0.0697429	20
hsa04110 Cell cycle	0.32796	-0.184994	0.0151329	0.0697429	124
hsa04360 Axon guidance	0.363326	-0.173771	0.0208595	0.0940896	121
hsa05213 Endometrial cancer	0.360155	-0.169186	0.0241447	0.106639	52
hsa04972 Pancreatic secretion	0.377437	-0.166811	0.0253841	0.109825	91
hsa05216 Thyroid cancer	0.368883	-0.164106	0.0282581	0.119814	28
hsa04720 Long-term potentiation	0.368158	-0.159385	0.0312749	0.130005	59
hsa05020 Prion diseases	0.372306	-0.151692	0.0390648	0.156425	28
hsa04350 TGF-beta signaling pathway	0.362739	-0.150545	0.0391063	0.156425	82
hsa04130 SNARE interactions in vesicular transport	0.353514	-0.151193	0.0398949	0.156624	34
hsa04742 Taste transduction	0.394329	-0.142929	0.0476579	0.1837	34
hsa04912 GnRH signaling pathway	0.382661	-0.139636	0.0510439	0.193238	87
hsa04370 VEGF signaling pathway	0.378943	-0.137762	0.0536815	0.199344	70
hsa00430 Taurine and hypotaurine metabolism	0.409775	-0.138942	0.0552675	0.199344	10
hsa05143 African trypanosomiasis	0.406057	-0.136681	0.0556659	0.199344	29
hsa04146 Peroxisome	0.35585	-0.135626	0.056418	0.199344	79
hsa04120 Ubiquitin mediated proteolysis	0.329283	-0.134431	0.0577779	0.199685	134
hsa05223 Non-small cell lung cancer	0.378652	-0.134323	0.0583985	0.199685	53
hsa03410 Base excision repair	0.36652	-0.130474	0.0649603	0.216021	33
hsa05214 Glioma	0.376987	-0.129417	0.0652139	0.216021	61
hsa05212 Pancreatic cancer	0.377255	-0.127893	0.0675855	0.220433	69
hsa03015 mRNA surveillance pathway	0.362891	-0.126091	0.0700674	0.225065	77
hsa04320 Dorso-ventral axis formation	0.385965	-0.125169	0.0734541	0.232422	24
hsa04970 Salivary secretion	0.393668	-0.122058	0.076624	0.238887	72
hsa00020 Citrate cycle (TCA cycle)	0.342244	-0.120759	0.0808301	0.248348	29
hsa04115 p53 signaling pathway	0.375029	-0.118935	0.0825054	0.249873	67
hsa05210 Colorectal cancer	0.373387	-0.114761	0.0898978	0.267211	62
hsa00510 N-Glycan biosynthesis	0.361561	-0.114725	0.0907509	0.267211	49
hsa05014 Amyotrophic lateral sclerosis (ALS)	0.381277	-0.111874	0.0961215	0.279147	49
hsa04270 Vascular smooth muscle contraction	0.395496	-0.101012	0.118422	0.339264	97
hsa03020 RNA polymerase	0.362408	-0.0986395	0.126595	0.357843	29
hsa03430 Mismatch repair	0.374695	-0.0942936	0.13507	0.376774	23
hsa04940 Type I diabetes mellitus	0.40339	-0.0852179	0.16036	0.43672	34
hsa00120 Primary bile acid biosynthesis	0.413759	-0.0856642	0.16068	0.43672	14
hsa04920 Adipocytokine signaling pathway	0.393755	-0.0837671	0.163814	0.439603	64
hsa04145 Phagosome	0.357714	-0.0814495	0.170219	0.451081	137
hsa00970 Aminoacyl-tRNA biosynthesis	0.327332	-0.0804576	0.176025	0.460708	41
hsa05218 Melanoma	0.399726	-0.0734191	0.19513	0.504483	64
hsa04664 Fc epsilon RI signaling pathway	0.404645	-0.0702284	0.205598	0.525143	72
hsa00052 Galactose metabolism	0.401854	-0.0674065	0.217288	0.548394	23
hsa05221 Acute myeloid leukemia	0.404616	-0.060562	0.240022	0.598642	55
hsa00380 Tryptophan metabolism	0.397632	-0.0585761	0.248257	0.611983	39
hsa04660 T cell receptor signaling pathway	0.396653	-0.0438988	0.304438	0.741849	93
hsa04510 Focal adhesion	0.388144	-0.042718	0.308582	0.743402	190
hsa04210 Apoptosis	0.408819	-0.0417663	0.312987	0.744369	80
hsa05160 Hepatitis C	0.396365	-0.0409087	0.316006	0.744369	117
hsa05220 Chronic myeloid leukemia	0.392396	-0.0359601	0.336981	0.785055	72
hsa03420 Nucleotide excision repair	0.391095	-0.0344587	0.343387	0.791284	43
hsa00030 Pentose phosphate pathway	0.399492	-0.0289996	0.368013	0.837666	25
hsa04662 B cell receptor signaling pathway	0.407136	-0.0281874	0.371418	0.837666	69
hsa03022 Basal transcription factors	0.409901	-0.022276	0.397895	0.887935	34
hsa03440 Homologous recombination	0.417085	-0.0198281	0.408068	0.901149	28
hsa00630 Glyoxylate and dicarboxylate metabolism	0.400855	-0.0142616	0.435654	0.944405	18
hsa04380 Osteoclast differentiation	0.417412	-0.013731	0.436565	0.944405	113
hsa05200 Pathways in cancer	0.411404	-0.0126383	0.441114	0.944608	302
hsa05100 Bacterial invasion of epithelial cells	0.3916	-0.0101339	0.453756	0.961962	69
hsa00520 Amino sugar and nucleotide sugar metabolism	0.408444	-0.0087293	0.45939	0.964264	45
hsa00640 Propanoate metabolism	0.381898	-0.00760448	0.465799	0.968132	30
hsa00240 Pyrimidine metabolism	0.401573	-0.00435454	0.479273	0.986465	95
hsa05146 Amoebiasis	0.426456	-0.00223053	0.489527	0.997882	87
hsa04062 Chemokine signaling pathway	0.42622	-0.000845379	0.495972	1	146
hsa00562 Inositol phosphate metabolism	0.42209	0.000937846	0.504116	1	54
hsa05142 Chagas disease (American trypanosomiasis)	0.428639	0.00100347	0.504809	1	88
hsa02010 ABC transporters	0.434485	0.00732956	0.533234	1	43
hsa01040 Biosynthesis of unsaturated fatty acids	0.417488	0.00797984	0.536689	1	21
hsa04530 Tight junction	0.415784	0.0210194	0.597487	1	121
hsa05130 Pathogenic Escherichia coli infection	0.355025	0.0254176	0.615318	1	52
hsa04620 Toll-like receptor signaling pathway	0.432357	0.0257703	0.618564	1	79
hsa04142 Lysosome	0.355045	0.0299858	0.637117	1	117
hsa04330 Notch signaling pathway	0.435088	0.030177	0.637296	1	43
hsa04010 MAPK signaling pathway	0.421303	0.0328908	0.650455	1	240
hsa00290 Valine, leucine and isoleucine biosynthesis	0.431039	0.0342322	0.651593	1	10
hsa00500 Starch and sucrose metabolism	0.452896	0.0419495	0.687086	1	38
hsa04623 Cytosolic DNA-sensing pathway	0.449033	0.0445312	0.697739	1	37
hsa03450 Non-homologous end-joining	0.427933	0.0458788	0.69917	1	13
hsa05131 Shigellosis	0.399422	0.0450847	0.701064	1	58
hsa05219 Bladder cancer	0.443563	0.0487687	0.714516	1	42
hsa00600 Sphingolipid metabolism	0.439644	0.0516151	0.725658	1	37
hsa00592 alpha-Linolenic acid metabolism	0.479052	0.0578821	0.746293	1	16
hsa04916 Melanogenesis	0.453737	0.0584426	0.753211	1	84
hsa03030 DNA replication	0.435879	0.064977	0.760937	1	36
hsa00670 One carbon pool by folate	0.439798	0.0653586	0.775399	1	18
hsa00250 Alanine, aspartate and glutamate metabolism	0.445577	0.0676584	0.784118	1	31
hsa04630 Jak-STAT signaling pathway	0.450479	0.0691301	0.790905	1	119
hsa00270 Cysteine and methionine metabolism	0.445296	0.069993	0.791818	1	34
hsa04621 NOD-like receptor signaling pathway	0.454353	0.0706903	0.79531	1	52
hsa00533 Glycosaminoglycan biosynthesis - keratan sulfate	0.471811	0.0793305	0.818635	1	14
hsa00620 Pyruvate metabolism	0.430238	0.083828	0.835045	1	37
hsa05217 Basal cell carcinoma	0.467878	0.0881656	0.847696	1	44
hsa05222 Small cell lung cancer	0.457835	0.0909082	0.856444	1	84
hsa00601 Glycosphingolipid biosynthesis - lacto and neolacto series	0.480672	0.0922859	0.857631	1	24
hsa04971 Gastric acid secretion	0.470582	0.0936961	0.863332	1	64
hsa00450 Selenocompound metabolism	0.453261	0.0968806	0.866062	1	17
hsa04622 RIG-I-like receptor signaling pathway	0.459766	0.10792	0.896176	1	55
hsa04122 Sulfur relay system	0.492645	0.111237	0.897473	1	10
hsa04614 Renin-angiotensin system	0.476084	0.111017	0.897645	1	12
hsa00100 Steroid biosynthesis	0.399332	0.119949	0.912845	1	17
hsa04976 Bile secretion	0.484799	0.125828	0.929359	1	64
hsa00830 Retinol metabolism	0.491578	0.127762	0.931806	1	41
hsa05412 Arrhythmogenic right ventricular cardiomyopathy (ARVC)	0.467221	0.128105	0.932731	1	65
hsa04964 Proximal tubule bicarbonate reclamation	0.500352	0.133627	0.939334	1	22
hsa04722 Neurotrophin signaling pathway	0.458828	0.13276	0.939985	1	119
hsa04144 Endocytosis	0.470744	0.134501	0.942652	1	194
hsa00230 Purine metabolism	0.447784	0.142658	0.952533	1	153
hsa04012 ErbB signaling pathway	0.468822	0.142835	0.95264	1	87
hsa00591 Linoleic acid metabolism	0.514943	0.151271	0.960176	1	25
hsa00980 Metabolism of xenobiotics by cytochrome P450	0.484649	0.150568	0.960545	1	52
hsa00053 Ascorbate and aldarate metabolism	0.491101	0.161757	0.968386	1	14
hsa00590 Arachidonic acid metabolism	0.501174	0.163885	0.972054	1	50
hsa00040 Pentose and glucuronate interconversions	0.494839	0.165801	0.972208	1	20
hsa00563 Glycosylphosphatidylinositol(GPI)-anchor biosynthesis	0.453079	0.168209	0.973998	1	24
hsa00860 Porphyrin and chlorophyll metabolism	0.47911	0.169615	0.975264	1	29
hsa00770 Pantothenate and CoA biosynthesis	0.495596	0.172687	0.976373	1	15
hsa00534 Glycosaminoglycan biosynthesis - heparan sulfate	0.510438	0.174173	0.978377	1	25
hsa04670 Leukocyte transendothelial migration	0.47332	0.172839	0.978509	1	108
hsa00565 Ether lipid metabolism	0.503133	0.174304	0.978659	1	32
hsa00140 Steroid hormone biosynthesis	0.508238	0.179887	0.981812	1	38
hsa00983 Drug metabolism - other enzymes	0.507268	0.188236	0.985768	1	34
hsa04020 Calcium signaling pathway	0.503173	0.188131	0.986274	1	147
hsa05410 Hypertrophic cardiomyopathy (HCM)	0.496411	0.191523	0.987409	1	70
hsa05145 Toxoplasmosis	0.493263	0.194413	0.988644	1	122
hsa04744 Phototransduction	0.520574	0.207388	0.991638	1	18
hsa05340 Primary immunodeficiency	0.521965	0.207922	0.992025	1	26
hsa00360 Phenylalanine metabolism	0.516249	0.21022	0.992341	1	16
hsa00350 Tyrosine metabolism	0.51272	0.216458	0.994167	1	38
hsa00604 Glycosphingolipid biosynthesis - ganglio series	0.505709	0.220143	0.994243	1	15
hsa00514 Other types of O-glycan biosynthesis	0.52491	0.218306	0.994459	1	32
hsa00920 Sulfur metabolism	0.509455	0.231514	0.995879	1	12
hsa00511 Other glycan degradation	0.468045	0.232806	0.995913	1	15
hsa04974 Protein digestion and absorption	0.520225	0.231355	0.99659	1	72
hsa00740 Riboflavin metabolism	0.514988	0.247423	0.997484	1	10
hsa00531 Glycosaminoglycan degradation	0.508911	0.24784	0.997836	1	17
hsa00561 Glycerolipid metabolism	0.514626	0.248384	0.998109	1	44
hsa00480 Glutathione metabolism	0.497089	0.256068	0.998577	1	46
hsa05310 Asthma	0.55536	0.266524	0.998942	1	22
hsa00512 Mucin type O-Glycan biosynthesis	0.525684	0.26883	0.999099	1	28
hsa04977 Vitamin digestion and absorption	0.545526	0.273466	0.999225	1	23
hsa04650 Natural killer cell mediated cytotoxicity	0.527675	0.273926	0.999335	1	101
hsa05140 Leishmaniasis	0.522696	0.278439	0.999431	1	65
hsa00603 Glycosphingolipid biosynthesis - globo series	0.534495	0.285643	0.999473	1	14
hsa00532 Glycosaminoglycan biosynthesis - chondroitin sulfate	0.542372	0.286293	0.99953	1	20
hsa00900 Terpenoid backbone biosynthesis	0.486624	0.293342	0.99957	1	15
hsa04975 Fat digestion and absorption	0.555913	0.286629	0.999582	1	36
hsa00564 Glycerophospholipid metabolism	0.543579	0.290265	0.999657	1	75
hsa03320 PPAR signaling pathway	0.544692	0.290685	0.999662	1	61
hsa00982 Drug metabolism - cytochrome P450	0.53483	0.294162	0.9997	1	51
hsa00340 Histidine metabolism	0.538543	0.297259	0.999715	1	28
hsa00760 Nicotinate and nicotinamide metabolism	0.538417	0.303285	0.999776	1	23
hsa04672 Intestinal immune network for IgA production	0.564606	0.312967	0.99986	1	34
hsa05414 Dilated cardiomyopathy	0.544283	0.325359	0.999929	1	77
hsa05150 Staphylococcus aureus infection	0.542444	0.329278	0.999936	1	48
hsa00260 Glycine, serine and threonine metabolism	0.550289	0.335393	0.999951	1	30
hsa05322 Systemic lupus erythematosus	0.53585	0.359721	0.999987	1	77
hsa05416 Viral myocarditis	0.55822	0.411274	0.999999	1	59
hsa00910 Nitrogen metabolism	0.599458	0.433254	1	1	22
hsa04060 Cytokine-cytokine receptor interaction	0.519926	0.439251	1	1	181
hsa05144 Malaria	0.58319	0.444362	1	1	44
hsa04640 Hematopoietic cell lineage	0.592505	0.462576	1	1	68
hsa04514 Cell adhesion molecules (CAMs)	0.586697	0.466445	1	1	110
hsa04080 Neuroactive ligand-receptor interaction	0.510705	0.502994	1	1	189
hsa00330 Arginine and proline metabolism	0.59833	0.506044	1	1	52
hsa04740 Olfactory transduction	0.541904	0.508442	1	1	104
hsa04610 Complement and coagulation cascades	0.625565	0.555157	1	1	64
hsa04512 ECM-receptor interaction	0.596878	0.586494	1	1	78
hsa04612 Antigen processing and presentation	0.628629	0.695901	1	1	60
hsa05320 Autoimmune thyroid disease	0.699966	0.833053	1	1	34
hsa05330 Allograft rejection	0.701242	0.836721	1	1	29
hsa05332 Graft-versus-host disease	0.710151	0.854194	1	1	27
hsa00232 Caffeine metabolism	NA	NA	NA	NA	3
hsa01100 Metabolic pathways	NA	NA	NA	NA	1050
hsa00300 Lysine biosynthesis	NA	NA	NA	NA	3
hsa00130 Ubiquinone and other terpenoid-quinone biosynthesis	NA	NA	NA	NA	7
hsa00062 Fatty acid elongation in mitochondria	NA	NA	NA	NA	8
hsa00785 Lipoic acid metabolism	NA	NA	NA	NA	3
hsa00460 Cyanoamino acid metabolism	NA	NA	NA	NA	6
hsa00472 D-Arginine and D-ornithine metabolism	NA	NA	NA	NA	1
hsa00790 Folate biosynthesis	NA	NA	NA	NA	8
hsa00061 Fatty acid biosynthesis	NA	NA	NA	NA	5
hsa00400 Phenylalanine, tyrosine and tryptophan biosynthesis	NA	NA	NA	NA	5
hsa00524 Butirosin and neomycin biosynthesis	NA	NA	NA	NA	3
hsa00730 Thiamine metabolism	NA	NA	NA	NA	4
hsa00471 D-Glutamine and D-glutamate metabolism	NA	NA	NA	NA	4
hsa00750 Vitamin B6 metabolism	NA	NA	NA	NA	6
hsa00780 Biotin metabolism	NA	NA	NA	NA	2
hsa00072 Synthesis and degradation of ketone bodies	NA	NA	NA	NA	9

## Sheet: Alpha.upregulated.pathways
KEGG Pathway	p.geomean	stat.mean	p.val	q.val	set.size
hsa05332 Graft-versus-host disease	0.16435	0.854194	2.89e-23	6.13e-21	27
hsa05330 Allograft rejection	0.166605	0.836721	1.94e-22	1.76e-20	29
hsa05320 Autoimmune thyroid disease	0.16645	0.833053	2.49e-22	1.76e-20	34
hsa04612 Antigen processing and presentation	0.184985	0.695901	2.45e-16	1.3e-14	60
hsa04512 ECM-receptor interaction	0.214691	0.586494	3.73e-12	1.58e-10	78
hsa04610 Complement and coagulation cascades	0.242116	0.555157	4.52e-11	1.6e-09	64
hsa04740 Olfactory transduction	0.218233	0.508442	1.51e-09	4.54e-08	104
hsa00330 Arginine and proline metabolism	0.249271	0.506044	1.85e-09	4.54e-08	52
hsa04080 Neuroactive ligand-receptor interaction	0.208623	0.502994	1.93e-09	4.54e-08	189
hsa04514 Cell adhesion molecules (CAMs)	0.263025	0.466445	2.36e-08	5.01e-07	110
hsa04640 Hematopoietic cell lineage	0.27031	0.462576	3.28e-08	6.33e-07	68
hsa05144 Malaria	0.274785	0.444362	1.19e-07	2.09e-06	44
hsa04060 Cytokine-cytokine receptor interaction	0.238733	0.439251	1.34e-07	2.18e-06	181
hsa00910 Nitrogen metabolism	0.291478	0.433254	2.63e-07	3.98e-06	22
hsa05416 Viral myocarditis	0.275396	0.411274	7.9e-07	1.12e-05	59
hsa05322 Systemic lupus erythematosus	0.288254	0.359721	1.32e-05	0.00017468	77
hsa00260 Glycine, serine and threonine metabolism	0.31237	0.335393	4.93e-05	0.000614841	30
hsa05150 Staphylococcus aureus infection	0.311969	0.329278	6.42e-05	0.000755754	48
hsa05414 Dilated cardiomyopathy	0.312876	0.325359	7.08e-05	0.00079046	77
hsa04672 Intestinal immune network for IgA production	0.337622	0.312967	0.000139886	0.00148279	34
hsa00760 Nicotinate and nicotinamide metabolism	0.3239	0.303285	0.000223515	0.00225644	23
hsa00340 Histidine metabolism	0.32529	0.297259	0.000284734	0.0027438	28
hsa00982 Drug metabolism - cytochrome P450	0.324329	0.294162	0.000299969	0.00276494	51
hsa03320 PPAR signaling pathway	0.335196	0.290685	0.000337924	0.00290537	61
hsa00564 Glycerophospholipid metabolism	0.332586	0.290265	0.000342614	0.00290537	75
hsa04975 Fat digestion and absorption	0.345889	0.286629	0.000418236	0.00337823	36
hsa00900 Terpenoid backbone biosynthesis	0.294808	0.293342	0.000430246	0.00337823	15
hsa00532 Glycosaminoglycan biosynthesis - chondroitin sulfate	0.337721	0.286293	0.000469833	0.0035573	20
hsa00603 Glycosphingolipid biosynthesis - globo series	0.333566	0.285643	0.000526611	0.00384971	14
hsa05140 Leishmaniasis	0.326332	0.278439	0.000569183	0.00402222	65
hsa04650 Natural killer cell mediated cytotoxicity	0.333962	0.273926	0.000665245	0.00454942	101
hsa04977 Vitamin digestion and absorption	0.347276	0.273466	0.000775497	0.00513766	23
hsa00512 Mucin type O-Glycan biosynthesis	0.334901	0.26883	0.000900786	0.00578687	28
hsa05310 Asthma	0.360704	0.266524	0.00105792	0.00659642	22
hsa00480 Glutathione metabolism	0.320972	0.256068	0.00142303	0.00861952	46
hsa00561 Glycerolipid metabolism	0.337958	0.248384	0.00189105	0.0111362	44
hsa00531 Glycosaminoglycan degradation	0.336801	0.24784	0.0021638	0.012398	17
hsa00740 Riboflavin metabolism	0.343982	0.247423	0.00251644	0.0140391	10
hsa04974 Protein digestion and absorption	0.352665	0.231355	0.00341039	0.0185385	72
hsa00511 Other glycan degradation	0.314191	0.232806	0.00408668	0.021308	15
hsa00920 Sulfur metabolism	0.348478	0.231514	0.0041209	0.021308	12
hsa00514 Other types of O-glycan biosynthesis	0.364641	0.218306	0.00554091	0.0279684	32
hsa00604 Glycosphingolipid biosynthesis - ganglio series	0.351071	0.220143	0.00575723	0.028105	15
hsa00350 Tyrosine metabolism	0.356667	0.216458	0.00583311	0.028105	38
hsa00360 Phenylalanine metabolism	0.365871	0.21022	0.00765937	0.0360841	16
hsa05340 Primary immunodeficiency	0.371368	0.207922	0.00797465	0.0367527	26
hsa04744 Phototransduction	0.369919	0.207388	0.00836174	0.0377168	18
hsa05145 Toxoplasmosis	0.355257	0.194413	0.0113562	0.0501567	122
hsa05410 Hypertrophic cardiomyopathy (HCM)	0.357895	0.191523	0.0125906	0.0544737	70
hsa04020 Calcium signaling pathway	0.365122	0.188131	0.0137261	0.0581986	147
hsa00983 Drug metabolism - other enzymes	0.370203	0.188236	0.0142322	0.0591613	34
hsa00140 Steroid hormone biosynthesis	0.377162	0.179887	0.0181884	0.0741526	38
hsa00565 Ether lipid metabolism	0.375889	0.174304	0.0213415	0.0833481	32
hsa04670 Leukocyte transendothelial migration	0.35215	0.172839	0.0214906	0.0833481	108
hsa00534 Glycosaminoglycan biosynthesis - heparan sulfate	0.382223	0.174173	0.0216233	0.0833481	25
hsa00770 Pantothenate and CoA biosynthesis	0.372609	0.172687	0.0236267	0.089444	15
hsa00860 Porphyrin and chlorophyll metabolism	0.357969	0.169615	0.0247356	0.0919991	29
hsa00563 Glycosylphosphatidylinositol(GPI)-anchor biosynthesis	0.340179	0.168209	0.0260024	0.0950433	24
hsa00040 Pentose and glucuronate interconversions	0.375093	0.165801	0.0277919	0.0987425	20
hsa00590 Arachidonic acid metabolism	0.380284	0.163885	0.027946	0.0987425	50
hsa00053 Ascorbate and aldarate metabolism	0.376731	0.161757	0.0316139	0.109871	14
hsa00980 Metabolism of xenobiotics by cytochrome P450	0.376031	0.150568	0.0394552	0.134011	52
hsa00591 Linoleic acid metabolism	0.403264	0.151271	0.0398239	0.134011	25
hsa04012 ErbB signaling pathway	0.366768	0.142835	0.0473601	0.154815	87
hsa00230 Purine metabolism	0.34562	0.142658	0.047467	0.154815	153
hsa04144 Endocytosis	0.374486	0.134501	0.0573476	0.184207	194
hsa04722 Neurotrophin signaling pathway	0.364603	0.13276	0.0600148	0.189137	119
hsa04964 Proximal tubule bicarbonate reclamation	0.401198	0.133627	0.0606664	0.189137	22
hsa05412 Arrhythmogenic right ventricular cardiomyopathy (ARVC)	0.375123	0.128105	0.0672688	0.20653	65
hsa00830 Retinol metabolism	0.397521	0.127762	0.068194	0.20653	41
hsa04976 Bile secretion	0.392524	0.125828	0.0706406	0.210927	64
hsa00100 Steroid biosynthesis	0.323744	0.119949	0.0871551	0.256623	17
hsa04614 Renin-angiotensin system	0.397415	0.111017	0.102355	0.293477	12
hsa04122 Sulfur relay system	0.412337	0.111237	0.102527	0.293477	10
hsa04622 RIG-I-like receptor signaling pathway	0.382797	0.10792	0.103824	0.293477	55
hsa00450 Selenocompound metabolism	0.384361	0.0968806	0.133938	0.373616	17
hsa04971 Gastric acid secretion	0.401756	0.0936961	0.136668	0.37628	64
hsa00601 Glycosphingolipid biosynthesis - lacto and neolacto series	0.412573	0.0922859	0.142369	0.38524	24
hsa05222 Small cell lung cancer	0.39336	0.0909082	0.143556	0.38524	84
hsa05217 Basal cell carcinoma	0.403322	0.0881656	0.152304	0.403606	44
hsa00620 Pyruvate metabolism	0.372366	0.083828	0.164955	0.431735	37
hsa00533 Glycosaminoglycan biosynthesis - keratan sulfate	0.414151	0.0793305	0.181365	0.468896	14
hsa04621 NOD-like receptor signaling pathway	0.403102	0.0706903	0.20469	0.521506	52
hsa00270 Cysteine and methionine metabolism	0.395011	0.069993	0.208182	0.521506	34
hsa04630 Jak-STAT signaling pathway	0.39986	0.0691301	0.209095	0.521506	119
hsa00250 Alanine, aspartate and glutamate metabolism	0.397542	0.0676584	0.215882	0.532174	31
hsa00670 One carbon pool by folate	0.395348	0.0653586	0.224601	0.547303	18
hsa03030 DNA replication	0.372316	0.064977	0.239063	0.575925	36
hsa04916 Melanogenesis	0.411959	0.0584426	0.246789	0.587858	84
hsa00592 alpha-Linolenic acid metabolism	0.436419	0.0578821	0.253707	0.59762	16
hsa00600 Sphingolipid metabolism	0.402214	0.0516151	0.274342	0.639127	37
hsa05219 Bladder cancer	0.407312	0.0487687	0.285484	0.657855	42
hsa05131 Shigellosis	0.370905	0.0450847	0.298936	0.674519	58
hsa03450 Non-homologous end-joining	0.396344	0.0458788	0.30083	0.674519	13
hsa04623 Cytosolic DNA-sensing pathway	0.416437	0.0445312	0.302261	0.674519	37
hsa00500 Starch and sucrose metabolism	0.421475	0.0419495	0.312914	0.691017	38
hsa00290 Valine, leucine and isoleucine biosynthesis	0.407875	0.0342322	0.348407	0.756158	10
hsa04010 MAPK signaling pathway	0.401355	0.0328908	0.349545	0.756158	240
hsa04330 Notch signaling pathway	0.41303	0.030177	0.362704	0.769311	43
hsa04142 Lysosome	0.336279	0.0299858	0.362883	0.769311	117
hsa04620 Toll-like receptor signaling pathway	0.414297	0.0257703	0.381436	0.799536	79
hsa05130 Pathogenic Escherichia coli infection	0.339046	0.0254176	0.384682	0.799536	52
hsa04530 Tight junction	0.402481	0.0210194	0.402513	0.828473	121
hsa01040 Biosynthesis of unsaturated fatty acids	0.411837	0.00797984	0.463311	0.942423	21
hsa02010 ABC transporters	0.427691	0.00732956	0.466766	0.942423	43
hsa05142 Chagas disease (American trypanosomiasis)	0.428387	0.00100347	0.495191	0.982499	88
hsa00562 Inositol phosphate metabolism	0.420816	0.000937846	0.495884	0.982499	54
hsa04062 Chemokine signaling pathway	0.426319	-0.000845379	0.504028	0.989388	146
hsa05146 Amoebiasis	0.427909	-0.00223053	0.510473	0.992847	87
hsa00240 Pyrimidine metabolism	0.402738	-0.00435454	0.520727	1	95
hsa00640 Propanoate metabolism	0.387189	-0.00760448	0.534201	1	30
hsa00520 Amino sugar and nucleotide sugar metabolism	0.414248	-0.0087293	0.54061	1	45
hsa05100 Bacterial invasion of epithelial cells	0.401205	-0.0101339	0.546244	1	69
hsa05200 Pathways in cancer	0.421341	-0.0126383	0.558886	1	302
hsa04380 Osteoclast differentiation	0.429811	-0.013731	0.563435	1	113
hsa00630 Glyoxylate and dicarboxylate metabolism	0.41099	-0.0142616	0.564346	1	18
hsa03440 Homologous recombination	0.430295	-0.0198281	0.591932	1	28
hsa03022 Basal transcription factors	0.425806	-0.022276	0.602105	1	34
hsa04662 B cell receptor signaling pathway	0.428972	-0.0281874	0.628582	1	69
hsa00030 Pentose phosphate pathway	0.418875	-0.0289996	0.631987	1	25
hsa03420 Nucleotide excision repair	0.413357	-0.0344587	0.656613	1	43
hsa05220 Chronic myeloid leukemia	0.416656	-0.0359601	0.663019	1	72
hsa05160 Hepatitis C	0.425584	-0.0409087	0.683994	1	117
hsa04210 Apoptosis	0.440827	-0.0417663	0.687013	1	80
hsa04510 Focal adhesion	0.421165	-0.042718	0.691418	1	190
hsa04660 T cell receptor signaling pathway	0.431329	-0.0438988	0.695562	1	93
hsa00380 Tryptophan metabolism	0.440718	-0.0585761	0.751743	1	39
hsa05221 Acute myeloid leukemia	0.449319	-0.060562	0.759978	1	55
hsa00052 Galactose metabolism	0.449247	-0.0674065	0.782712	1	23
hsa04664 Fc epsilon RI signaling pathway	0.455243	-0.0702284	0.794402	1	72
hsa05218 Melanoma	0.451413	-0.0734191	0.80487	1	64
hsa00970 Aminoacyl-tRNA biosynthesis	0.378257	-0.0804576	0.823975	1	41
hsa04145 Phagosome	0.414121	-0.0814495	0.829781	1	137
hsa04920 Adipocytokine signaling pathway	0.454052	-0.0837671	0.836186	1	64
hsa00120 Primary bile acid biosynthesis	0.475416	-0.0856642	0.83932	1	14
hsa04940 Type I diabetes mellitus	0.464108	-0.0852179	0.83964	1	34
hsa03430 Mismatch repair	0.435556	-0.0942936	0.86493	1	23
hsa03020 RNA polymerase	0.428809	-0.0986395	0.873405	1	29
hsa04270 Vascular smooth muscle contraction	0.469109	-0.101012	0.881578	1	97
hsa05014 Amyotrophic lateral sclerosis (ALS)	0.462307	-0.111874	0.903878	1	49
hsa00510 N-Glycan biosynthesis	0.440915	-0.114725	0.909249	1	49
hsa05210 Colorectal cancer	0.45301	-0.114761	0.910102	1	62
hsa04115 p53 signaling pathway	0.461223	-0.118935	0.917495	1	67
hsa00020 Citrate cycle (TCA cycle)	0.420334	-0.120759	0.91917	1	29
hsa04970 Salivary secretion	0.483122	-0.122058	0.923376	1	72
hsa04320 Dorso-ventral axis formation	0.476116	-0.125169	0.926546	1	24
hsa03015 mRNA surveillance pathway	0.448646	-0.126091	0.929933	1	77
hsa05212 Pancreatic cancer	0.47031	-0.127893	0.932415	1	69
hsa05214 Glioma	0.469054	-0.129417	0.934786	1	61
hsa03410 Base excision repair	0.458276	-0.130474	0.93504	1	33
hsa05223 Non-small cell lung cancer	0.475151	-0.134323	0.941601	1	53
hsa04120 Ubiquitin mediated proteolysis	0.417758	-0.134431	0.942222	1	134
hsa04146 Peroxisome	0.449312	-0.135626	0.943582	1	79
hsa05143 African trypanosomiasis	0.508138	-0.136681	0.944334	1	29
hsa00430 Taurine and hypotaurine metabolism	0.511818	-0.138942	0.944733	1	10
hsa04370 VEGF signaling pathway	0.47974	-0.137762	0.946319	1	70
hsa04912 GnRH signaling pathway	0.483967	-0.139636	0.948956	1	87
hsa04742 Taste transduction	0.498272	-0.142929	0.952342	1	34
hsa04130 SNARE interactions in vesicular transport	0.459767	-0.151193	0.960105	1	34
hsa04350 TGF-beta signaling pathway	0.468964	-0.150545	0.960894	1	82
hsa05020 Prion diseases	0.480126	-0.151692	0.960935	1	28
hsa04720 Long-term potentiation	0.48146	-0.159385	0.968725	1	59
hsa05216 Thyroid cancer	0.485121	-0.164106	0.971742	1	28
hsa04972 Pancreatic secretion	0.499524	-0.166811	0.974616	1	91
hsa05213 Endometrial cancer	0.479627	-0.169186	0.975855	1	52
hsa04360 Axon guidance	0.487191	-0.173771	0.979141	1	121
hsa04110 Cell cycle	0.452044	-0.184994	0.984867	1	124
hsa00410 beta-Alanine metabolism	0.458937	-0.188406	0.984982	1	20
hsa04730 Long-term depression	0.496501	-0.193071	0.987934	1	64
hsa04070 Phosphatidylinositol signaling system	0.503232	-0.195112	0.988752	1	71
hsa00051 Fructose and mannose metabolism	0.499204	-0.204869	0.991293	1	32
hsa00010 Glycolysis / Gluconeogenesis	0.45341	-0.208462	0.992439	1	57
hsa04340 Hedgehog signaling pathway	0.521891	-0.208566	0.992545	1	43
hsa04710 Circadian rhythm - mammal	0.490772	-0.211317	0.992673	1	22
hsa05211 Renal cell carcinoma	0.479685	-0.212237	0.993424	1	70
hsa05323 Rheumatoid arthritis	0.496013	-0.222922	0.995423	1	73
hsa04540 Gap junction	0.505831	-0.223093	0.995473	1	80
hsa03008 Ribosome biogenesis in eukaryotes	0.439432	-0.236682	0.997106	1	73
hsa04666 Fc gamma R-mediated phagocytosis	0.528621	-0.238683	0.997406	1	91
hsa04914 Progesterone-mediated oocyte maturation	0.524864	-0.254053	0.998524	1	83
hsa04520 Adherens junction	0.474718	-0.25682	0.998639	1	72
hsa00310 Lysine degradation	0.498544	-0.263983	0.998932	1	43
hsa04810 Regulation of actin cytoskeleton	0.498117	-0.271378	0.999267	1	194
hsa04260 Cardiac muscle contraction	0.512057	-0.294584	0.99971	1	69
hsa05016 Huntington's disease	0.353624	-0.301853	0.999798	1	175
hsa04114 Oocyte meiosis	0.523856	-0.315597	0.99989	1	104
hsa00280 Valine, leucine and isoleucine degradation	0.486785	-0.321028	0.999903	1	44
hsa03040 Spliceosome	0.432181	-0.321129	0.999914	1	125
hsa05120 Epithelial cell signaling in Helicobacter pylori infection	0.521278	-0.349918	0.999978	1	62
hsa04310 Wnt signaling pathway	0.539777	-0.359593	0.999987	1	133
hsa04962 Vasopressin-regulated water reabsorption	0.539561	-0.365625	0.999989	1	39
hsa03018 RNA degradation	0.485235	-0.378119	0.999995	1	68
hsa04973 Carbohydrate digestion and absorption	0.57115	-0.38114	0.999995	1	37
hsa00071 Fatty acid metabolism	0.544429	-0.395935	0.999998	1	40
hsa04910 Insulin signaling pathway	0.56	-0.396974	0.999998	1	126
hsa03050 Proteasome	0.418874	-0.434292	1	1	41
hsa05010 Alzheimer's disease	0.416556	-0.433984	1	1	156
hsa04141 Protein processing in endoplasmic reticulum	0.41815	-0.445825	1	1	161
hsa05215 Prostate cancer	0.594619	-0.447677	1	1	86
hsa04966 Collecting duct acid secretion	0.560771	-0.454651	1	1	23
hsa00650 Butanoate metabolism	0.606499	-0.512507	1	1	29
hsa05110 Vibrio cholerae infection	0.568299	-0.568381	1	1	50
hsa05012 Parkinson's disease	0.435251	-0.645697	1	1	126
hsa03060 Protein export	0.569962	-0.69007	1	1	23
hsa04930 Type II diabetes mellitus	0.67786	-0.687785	1	1	44
hsa04960 Aldosterone-regulated sodium reabsorption	0.691057	-0.699989	1	1	40
hsa04150 mTOR signaling pathway	0.686764	-0.711124	1	1	52
hsa03013 RNA transport	0.587119	-0.722505	1	1	143
hsa03010 Ribosome	0.660695	-2.36313	1	1	88
hsa00190 Oxidative phosphorylation	0.451172	-0.829817	1	1	126
hsa04140 Regulation of autophagy	0.705257	-0.749614	1	1	23
hsa04950 Maturity onset diabetes of the young	0.845467	-1.34414	1	1	22
hsa00232 Caffeine metabolism	NA	NA	NA	NA	3
hsa01100 Metabolic pathways	NA	NA	NA	NA	1050
hsa00300 Lysine biosynthesis	NA	NA	NA	NA	3
hsa00130 Ubiquinone and other terpenoid-quinone biosynthesis	NA	NA	NA	NA	7
hsa00062 Fatty acid elongation in mitochondria	NA	NA	NA	NA	8
hsa00785 Lipoic acid metabolism	NA	NA	NA	NA	3
hsa00460 Cyanoamino acid metabolism	NA	NA	NA	NA	6
hsa00472 D-Arginine and D-ornithine metabolism	NA	NA	NA	NA	1
hsa00790 Folate biosynthesis	NA	NA	NA	NA	8
hsa00061 Fatty acid biosynthesis	NA	NA	NA	NA	5
hsa00400 Phenylalanine, tyrosine and tryptophan biosynthesis	NA	NA	NA	NA	5
hsa00524 Butirosin and neomycin biosynthesis	NA	NA	NA	NA	3
hsa00730 Thiamine metabolism	NA	NA	NA	NA	4
hsa00471 D-Glutamine and D-glutamate metabolism	NA	NA	NA	NA	4
hsa00750 Vitamin B6 metabolism	NA	NA	NA	NA	6
hsa00780 Biotin metabolism	NA	NA	NA	NA	2
hsa00072 Synthesis and degradation of ketone bodies	NA	NA	NA	NA	9

## Sheet: Beta.downregulated.pathways
KEGG Pathway	p.geomean	stat.mean	p.val	q.val	set.size
hsa05332 Graft-versus-host disease	0.166749	-0.838582	5.89e-27	8.48e-25	27
hsa05330 Allograft rejection	0.166301	-0.835615	8e-27	8.48e-25	29
hsa05320 Autoimmune thyroid disease	0.167295	-0.825832	2.49e-26	1.76e-24	34
hsa04612 Antigen processing and presentation	0.187742	-0.678494	1.31e-18	6.97e-17	60
hsa04610 Complement and coagulation cascades	0.219903	-0.651612	2.32e-17	8.81e-16	64
hsa04512 ECM-receptor interaction	0.200086	-0.650975	2.49e-17	8.81e-16	78
hsa04080 Neuroactive ligand-receptor interaction	0.182884	-0.615731	9.07e-16	2.75e-14	189
hsa04640 Hematopoietic cell lineage	0.24658	-0.55095	6.25e-13	1.66e-11	68
hsa04060 Cytokine-cytokine receptor interaction	0.223739	-0.503168	3.94e-11	9.27e-10	181
hsa05416 Viral myocarditis	0.253704	-0.489731	1.43e-10	3.04e-09	59
hsa04514 Cell adhesion molecules (CAMs)	0.26217	-0.465766	8.92e-10	1.72e-08	110
hsa04740 Olfactory transduction	0.227883	-0.463393	1.24e-09	2.18e-08	104
hsa05144 Malaria	0.26956	-0.463531	1.37e-09	2.23e-08	44
hsa05322 Systemic lupus erythematosus	0.265582	-0.443868	5.28e-09	7.99e-08	77
hsa05150 Staphylococcus aureus infection	0.28019	-0.438111	9.51e-09	1.34e-07	48
hsa00910 Nitrogen metabolism	0.293728	-0.421135	3.72e-08	4.93e-07	22
hsa05414 Dilated cardiomyopathy	0.287226	-0.414855	4.33e-08	5.4e-07	77
hsa00330 Arginine and proline metabolism	0.274632	-0.411788	5.96e-08	7.02e-07	52
hsa05140 Leishmaniasis	0.296201	-0.374599	6.86e-07	7.65e-06	65
hsa04650 Natural killer cell mediated cytotoxicity	0.303764	-0.372276	7.5e-07	7.96e-06	101
hsa04672 Intestinal immune network for IgA production	0.322185	-0.360038	2.02e-06	2.04e-05	34
hsa00982 Drug metabolism - cytochrome P450	0.323234	-0.302702	4.87e-05	0.000468937	51
hsa00532 Glycosaminoglycan biosynthesis - chondroitin sulfate	0.332393	-0.303721	5.41e-05	0.000498293	20
hsa05310 Asthma	0.3492	-0.300101	6.74e-05	0.000595728	22
hsa00512 Mucin type O-Glycan biosynthesis	0.32719	-0.296633	7.26e-05	0.000615608	28
hsa00760 Nicotinate and nicotinamide metabolism	0.328313	-0.290127	0.000105268	0.00085834	23
hsa04012 ErbB signaling pathway	0.321349	-0.284194	0.000121653	0.000955204	87
hsa05340 Primary immunodeficiency	0.347466	-0.281705	0.000156548	0.00115055	26
hsa00564 Glycerophospholipid metabolism	0.336546	-0.279157	0.000157387	0.00115055	75
hsa00260 Glycine, serine and threonine metabolism	0.329954	-0.278307	0.000183632	0.00129767	30
hsa00340 Histidine metabolism	0.333007	-0.27581	0.000210514	0.00143964	28
hsa03320 PPAR signaling pathway	0.342373	-0.269204	0.000256556	0.00169969	61
hsa00531 Glycosaminoglycan degradation	0.329183	-0.272808	0.000267107	0.00171596	17
hsa00603 Glycosphingolipid biosynthesis - globo series	0.339557	-0.265925	0.000384037	0.00239458	14
hsa00561 Glycerolipid metabolism	0.334985	-0.259645	0.000420528	0.0025472	44
hsa05410 Hypertrophic cardiomyopathy (HCM)	0.338289	-0.257226	0.000453362	0.0026698	70
hsa04975 Fat digestion and absorption	0.358395	-0.250451	0.000641075	0.00367319	36
hsa04977 Vitamin digestion and absorption	0.355198	-0.249105	0.000734325	0.00409676	23
hsa04722 Neurotrophin signaling pathway	0.326827	-0.244912	0.000778251	0.00423049	119
hsa05145 Toxoplasmosis	0.34371	-0.227641	0.00162865	0.00863187	122
hsa04010 MAPK signaling pathway	0.336705	-0.224629	0.00182025	0.00941205	240
hsa00350 Tyrosine metabolism	0.353669	-0.225461	0.00187546	0.00946659	38
hsa04974 Protein digestion and absorption	0.357653	-0.212689	0.00303553	0.0149659	72
hsa04020 Calcium signaling pathway	0.357932	-0.211007	0.00317789	0.0153116	147
hsa05412 Arrhythmogenic right ventricular cardiomyopathy (ARVC)	0.347834	-0.210742	0.00330782	0.0155835	65
hsa04976 Bile secretion	0.365544	-0.205483	0.00401446	0.0185014	64
hsa00480 Glutathione metabolism	0.336722	-0.20533	0.00415016	0.0187199	46
hsa04971 Gastric acid secretion	0.364019	-0.203921	0.00425824	0.0188072	64
hsa00983 Drug metabolism - other enzymes	0.367528	-0.197236	0.00565359	0.0244605	34
hsa00360 Phenylalanine metabolism	0.371623	-0.193583	0.00687068	0.0291317	16
hsa00604 Glycosphingolipid biosynthesis - ganglio series	0.35987	-0.192756	0.00734067	0.0305141	15
hsa00514 Other types of O-glycan biosynthesis	0.378104	-0.179626	0.0105348	0.0429496	32
hsa00040 Pentose and glucuronate interconversions	0.370375	-0.179005	0.0112923	0.0451692	20
hsa00591 Linoleic acid metabolism	0.395065	-0.172273	0.0138496	0.0543725	25
hsa00900 Terpenoid backbone biosynthesis	0.331672	-0.172365	0.0152583	0.0588137	15
hsa00511 Other glycan degradation	0.333143	-0.169762	0.0167885	0.0635563	15
hsa00140 Steroid hormone biosynthesis	0.382117	-0.164331	0.0174833	0.0650257	38
hsa04670 Leukocyte transendothelial migration	0.355567	-0.159327	0.0197685	0.0722574	108
hsa00601 Glycosphingolipid biosynthesis - lacto and neolacto series	0.391486	-0.153489	0.0248308	0.0892226	24
hsa00920 Sulfur metabolism	0.37317	-0.15269	0.0273289	0.092842	12
hsa04964 Proximal tubule bicarbonate reclamation	0.394966	-0.150138	0.027496	0.092842	22
hsa04620 Toll-like receptor signaling pathway	0.369832	-0.148612	0.0275881	0.092842	79
hsa00740 Riboflavin metabolism	0.372483	-0.153065	0.0275898	0.092842	10
hsa04662 B cell receptor signaling pathway	0.36478	-0.146787	0.0293585	0.0963831	69
hsa04380 Osteoclast differentiation	0.371357	-0.146061	0.0295514	0.0963831	113
hsa00565 Ether lipid metabolism	0.38524	-0.14587	0.0306845	0.0985622	32
hsa04744 Phototransduction	0.390476	-0.145636	0.0319415	0.0987008	18
hsa00534 Glycosaminoglycan biosynthesis - heparan sulfate	0.392533	-0.144534	0.0321049	0.0987008	25
hsa00053 Ascorbate and aldarate metabolism	0.381867	-0.146035	0.0321243	0.0987008	14
hsa04621 NOD-like receptor signaling pathway	0.377519	-0.14274	0.0331089	0.0994825	52
hsa05217 Basal cell carcinoma	0.383659	-0.142808	0.0333173	0.0994825	44
hsa04630 Jak-STAT signaling pathway	0.376357	-0.140542	0.0346557	0.102042	119
hsa00770 Pantothenate and CoA biosynthesis	0.383205	-0.141578	0.0363787	0.105648	15
hsa00980 Metabolism of xenobiotics by cytochrome P450	0.381802	-0.135572	0.0404546	0.115897	52
hsa00590 Arachidonic acid metabolism	0.391596	-0.128887	0.0485854	0.137335	50
hsa00250 Alanine, aspartate and glutamate metabolism	0.375701	-0.128865	0.0492843	0.137477	31
hsa04622 RIG-I-like receptor signaling pathway	0.377189	-0.125538	0.0529083	0.14567	55
hsa04916 Melanogenesis	0.390578	-0.116663	0.065866	0.17744	84
hsa04660 T cell receptor signaling pathway	0.372531	-0.116663	0.0661215	0.17744	93
hsa04062 Chemokine signaling pathway	0.38447	-0.113522	0.0710915	0.188392	146
hsa05222 Small cell lung cancer	0.387922	-0.110734	0.0763674	0.199875	84
hsa04614 Renin-angiotensin system	0.396962	-0.111854	0.0797062	0.20607	12
hsa05131 Shigellosis	0.351696	-0.0984937	0.103051	0.258101	58
hsa00830 Retinol metabolism	0.407262	-0.0982091	0.103414	0.258101	41
hsa04122 Sulfur relay system	0.416238	-0.100503	0.103484	0.258101	10
hsa00533 Glycosaminoglycan biosynthesis - keratan sulfate	0.408448	-0.0978835	0.107473	0.264933	14
hsa02010 ABC transporters	0.397697	-0.093524	0.114852	0.279868	43
hsa05142 Chagas disease (American trypanosomiasis)	0.396323	-0.0873766	0.129566	0.312136	88
hsa04144 Endocytosis	0.392233	-0.0804437	0.148955	0.354813	194
hsa00270 Cysteine and methionine metabolism	0.394601	-0.0741197	0.171128	0.403102	34
hsa00592 alpha-Linolenic acid metabolism	0.430138	-0.0740827	0.174164	0.405746	16
hsa05146 Amoebiasis	0.402269	-0.0691884	0.185942	0.428475	87
hsa04623 Cytosolic DNA-sensing pathway	0.4087	-0.0662441	0.197448	0.449349	37
hsa05200 Pathways in cancer	0.394628	-0.0647504	0.200867	0.449349	302
hsa00563 Glycosylphosphatidylinositol(GPI)-anchor biosynthesis	0.371601	-0.0655385	0.201359	0.449349	24
hsa04210 Apoptosis	0.403077	-0.062196	0.210918	0.465777	80
hsa04330 Notch signaling pathway	0.40179	-0.0582954	0.226969	0.4947	43
hsa00600 Sphingolipid metabolism	0.400429	-0.0580239	0.228682	0.4947	37
hsa00100 Steroid biosynthesis	0.346131	-0.0555604	0.243047	0.520464	17
hsa00670 One carbon pool by folate	0.401752	-0.0504461	0.258623	0.543865	18
hsa05220 Chronic myeloid leukemia	0.386288	-0.0501676	0.259105	0.543865	72
hsa05221 Acute myeloid leukemia	0.410239	-0.0449904	0.281084	0.584214	55
hsa00860 Porphyrin and chlorophyll metabolism	0.400643	-0.0436645	0.288309	0.593413	29
hsa05219 Bladder cancer	0.410481	-0.0397455	0.305271	0.617436	42
hsa04510 Focal adhesion	0.393938	-0.0391389	0.305806	0.617436	190
hsa04530 Tight junction	0.395217	-0.0380867	0.310986	0.621972	121
hsa05100 Bacterial invasion of epithelial cells	0.385011	-0.0363737	0.319176	0.632387	69
hsa00450 Selenocompound metabolism	0.407598	-0.0269581	0.368993	0.72432	17
hsa04142 Lysosome	0.338847	-0.0227284	0.384753	0.748326	117
hsa00562 Inositol phosphate metabolism	0.420039	-0.00540926	0.47254	0.901044	54
hsa05210 Colorectal cancer	0.409714	-0.00503916	0.474254	0.901044	62
hsa03030 DNA replication	0.397071	-0.00800701	0.476023	0.901044	36
hsa04664 Fc epsilon RI signaling pathway	0.427829	-0.00302014	0.484607	0.909175	72
hsa05160 Hepatitis C	0.41163	0.00664989	0.53426	0.993536	117
hsa04320 Dorso-ventral axis formation	0.433978	0.0132598	0.567639	1	24
hsa03450 Non-homologous end-joining	0.41781	0.0162678	0.581888	1	13
hsa00230 Purine metabolism	0.402935	0.02803	0.641678	1	153
hsa00520 Amino sugar and nucleotide sugar metabolism	0.422408	0.0285993	0.642929	1	45
hsa04920 Adipocytokine signaling pathway	0.444354	0.0513968	0.746186	1	64
hsa00620 Pyruvate metabolism	0.420527	0.0529656	0.750732	1	37
hsa05020 Prion diseases	0.443565	0.0531534	0.752011	1	28
hsa00290 Valine, leucine and isoleucine biosynthesis	0.43916	0.0589359	0.768361	1	10
hsa04270 Vascular smooth muscle contraction	0.453251	0.059079	0.777386	1	97
hsa04912 GnRH signaling pathway	0.450749	0.0594453	0.778715	1	87
hsa05211 Renal cell carcinoma	0.423503	0.0597113	0.779166	1	70
hsa04970 Salivary secretion	0.459903	0.0621665	0.789027	1	72
hsa00500 Starch and sucrose metabolism	0.460936	0.0630657	0.79146	1	38
hsa04370 VEGF signaling pathway	0.453211	0.0645498	0.797387	1	70
hsa00240 Pyrimidine metabolism	0.42455	0.0664214	0.804577	1	95
hsa03440 Homologous recombination	0.447823	0.0680667	0.80907	1	28
hsa05014 Amyotrophic lateral sclerosis (ALS)	0.447999	0.0710695	0.819612	1	49
hsa05212 Pancreatic cancer	0.447398	0.0712457	0.820508	1	69
hsa00030 Pentose phosphate pathway	0.43775	0.0788994	0.843383	1	25
hsa05223 Non-small cell lung cancer	0.455094	0.0784646	0.843872	1	53
hsa00120 Primary bile acid biosynthesis	0.472252	0.0791244	0.844472	1	14
hsa00380 Tryptophan metabolism	0.449132	0.0795708	0.846021	1	39
hsa04350 TGF-beta signaling pathway	0.443665	0.0799105	0.848806	1	82
hsa05218 Melanoma	0.456551	0.0827671	0.857382	1	64
hsa00430 Taurine and hypotaurine metabolism	0.496116	0.0978015	0.892938	1	10
hsa05143 African trypanosomiasis	0.492929	0.0981714	0.89678	1	29
hsa03022 Basal transcription factors	0.454919	0.0997428	0.899842	1	34
hsa04972 Pancreatic secretion	0.475649	0.102901	0.908106	1	91
hsa04145 Phagosome	0.421338	0.104727	0.911936	1	137
hsa00640 Propanoate metabolism	0.424091	0.108604	0.915922	1	30
hsa05130 Pathogenic Escherichia coli infection	0.380504	0.107961	0.916756	1	52
hsa04742 Taste transduction	0.483943	0.10756	0.91709	1	34
hsa00630 Glyoxylate and dicarboxylate metabolism	0.447682	0.112794	0.923818	1	18
hsa04720 Long-term potentiation	0.465876	0.118369	0.936458	1	59
hsa01040 Biosynthesis of unsaturated fatty acids	0.459128	0.120638	0.937678	1	21
hsa05213 Endometrial cancer	0.462847	0.12256	0.94277	1	52
hsa04360 Axon guidance	0.469779	0.127217	0.950034	1	121
hsa03420 Nucleotide excision repair	0.446931	0.129239	0.951771	1	43
hsa00052 Galactose metabolism	0.47812	0.135851	0.958826	1	23
hsa04130 SNARE interactions in vesicular transport	0.451919	0.136341	0.959557	1	34
hsa03410 Base excision repair	0.462783	0.139683	0.963123	1	33
hsa04340 Hedgehog signaling pathway	0.496529	0.146715	0.970665	1	43
hsa03015 mRNA surveillance pathway	0.462674	0.164013	0.982868	1	77
hsa04666 Fc gamma R-mediated phagocytosis	0.497295	0.165286	0.983665	1	91
hsa04115 p53 signaling pathway	0.480509	0.171366	0.986381	1	67
hsa05216 Thyroid cancer	0.492126	0.178183	0.988826	1	28
hsa05214 Glioma	0.487282	0.17784	0.989062	1	61
hsa03020 RNA polymerase	0.459162	0.185776	0.991162	1	29
hsa04120 Ubiquitin mediated proteolysis	0.435926	0.184986	0.991563	1	134
hsa00970 Aminoacyl-tRNA biosynthesis	0.417199	0.191629	0.992821	1	41
hsa03430 Mismatch repair	0.475756	0.198543	0.994543	1	23
hsa04146 Peroxisome	0.472192	0.198252	0.994711	1	79
hsa00410 beta-Alanine metabolism	0.464909	0.202172	0.994905	1	20
hsa00510 N-Glycan biosynthesis	0.474813	0.206121	0.995972	1	49
hsa05323 Rheumatoid arthritis	0.490774	0.209429	0.996553	1	73
hsa04540 Gap junction	0.498368	0.211914	0.996892	1	80
hsa04070 Phosphatidylinositol signaling system	0.512036	0.216546	0.997403	1	71
hsa04730 Long-term depression	0.50431	0.218427	0.99756	1	64
hsa04940 Type I diabetes mellitus	0.519968	0.223942	0.997983	1	34
hsa04710 Circadian rhythm - mammal	0.497578	0.229885	0.9983	1	22
hsa04810 Regulation of actin cytoskeleton	0.48648	0.238535	0.998984	1	194
hsa00020 Citrate cycle (TCA cycle)	0.471184	0.251478	0.999314	1	29
hsa04520 Adherens junction	0.474395	0.253071	0.999442	1	72
hsa00051 Fructose and mannose metabolism	0.525325	0.264542	0.999649	1	32
hsa00310 Lysine degradation	0.505807	0.278646	0.999825	1	43
hsa05120 Epithelial cell signaling in Helicobacter pylori infection	0.498129	0.289765	0.999904	1	62
hsa04110 Cell cycle	0.497319	0.295693	0.999933	1	124
hsa04962 Vasopressin-regulated water reabsorption	0.51321	0.304012	0.999951	1	39
hsa04914 Progesterone-mediated oocyte maturation	0.546668	0.306818	0.999963	1	83
hsa04260 Cardiac muscle contraction	0.523267	0.320769	0.999982	1	69
hsa04310 Wnt signaling pathway	0.529251	0.335157	0.999993	1	133
hsa03008 Ribosome biogenesis in eukaryotes	0.483309	0.357141	0.999998	1	73
hsa00280 Valine, leucine and isoleucine degradation	0.508366	0.376506	0.999999	1	44
hsa03040 Spliceosome	0.455623	0.381617	1	1	125
hsa04910 Insulin signaling pathway	0.556033	0.38277	1	1	126
hsa00010 Glycolysis / Gluconeogenesis	0.52835	0.39771	1	1	57
hsa04973 Carbohydrate digestion and absorption	0.594565	0.433768	1	1	37
hsa05215 Prostate cancer	0.592233	0.43487	1	1	86
hsa00071 Fatty acid metabolism	0.572011	0.46733	1	1	40
hsa04114 Oocyte meiosis	0.590166	0.466547	1	1	104
hsa03018 RNA degradation	0.52028	0.470734	1	1	68
hsa04966 Collecting duct acid secretion	0.577533	0.486535	1	1	23
hsa00650 Butanoate metabolism	0.604855	0.506041	1	1	29
hsa05016 Huntington's disease	0.423018	0.50863	1	1	175
hsa04141 Protein processing in endoplasmic reticulum	0.471037	0.588648	1	1	161
hsa05010 Alzheimer's disease	0.48262	0.608649	1	1	156
hsa05110 Vibrio cholerae infection	0.593474	0.623483	1	1	50
hsa03050 Proteasome	0.490375	0.639444	1	1	41
hsa04150 mTOR signaling pathway	0.698832	0.732043	1	1	52
hsa03013 RNA transport	0.601572	0.767202	1	1	143
hsa03010 Ribosome	0.642373	2.32198	1	1	88
hsa00190 Oxidative phosphorylation	0.540641	1.06275	1	1	126
hsa05012 Parkinson's disease	0.524605	0.880346	1	1	126
hsa04140 Regulation of autophagy	0.706423	0.741259	1	1	23
hsa03060 Protein export	0.611997	0.788001	1	1	23
hsa04930 Type II diabetes mellitus	0.701272	0.733001	1	1	44
hsa04950 Maturity onset diabetes of the young	0.895468	1.47258	1	1	22
hsa04960 Aldosterone-regulated sodium reabsorption	0.702093	0.7183	1	1	40
hsa00232 Caffeine metabolism	NA	NA	NA	NA	3
hsa01100 Metabolic pathways	NA	NA	NA	NA	1050
hsa00300 Lysine biosynthesis	NA	NA	NA	NA	3
hsa00130 Ubiquinone and other terpenoid-quinone biosynthesis	NA	NA	NA	NA	7
hsa00062 Fatty acid elongation in mitochondria	NA	NA	NA	NA	8
hsa00785 Lipoic acid metabolism	NA	NA	NA	NA	3
hsa00460 Cyanoamino acid metabolism	NA	NA	NA	NA	6
hsa00472 D-Arginine and D-ornithine metabolism	NA	NA	NA	NA	1
hsa00790 Folate biosynthesis	NA	NA	NA	NA	8
hsa00061 Fatty acid biosynthesis	NA	NA	NA	NA	5
hsa00400 Phenylalanine, tyrosine and tryptophan biosynthesis	NA	NA	NA	NA	5
hsa00524 Butirosin and neomycin biosynthesis	NA	NA	NA	NA	3
hsa00730 Thiamine metabolism	NA	NA	NA	NA	4
hsa00471 D-Glutamine and D-glutamate metabolism	NA	NA	NA	NA	4
hsa00750 Vitamin B6 metabolism	NA	NA	NA	NA	6
hsa00780 Biotin metabolism	NA	NA	NA	NA	2
hsa00072 Synthesis and degradation of ketone bodies	NA	NA	NA	NA	9

## Sheet: Beta.upregulated.pathways
KEGG Pathway	p.geomean	stat.mean	p.val	q.val	set.size
hsa03010 Ribosome	0.00185873	2.32198	4.82e-188	1.02e-185	88
hsa04950 Maturity onset diabetes of the young	0.0692671	1.47258	3.83e-77	4.06e-75	22
hsa00190 Oxidative phosphorylation	0.0630196	1.06275	7.9e-43	5.58e-41	126
hsa05012 Parkinson's disease	0.0933066	0.880346	4.5e-30	2.38e-28	126
hsa03060 Protein export	0.148402	0.788001	1.71e-23	7.25e-22	23
hsa03013 RNA transport	0.14687	0.767202	2.05e-23	7.25e-22	143
hsa04140 Regulation of autophagy	0.202855	0.741259	2.03e-21	5.4e-20	23
hsa04930 Type II diabetes mellitus	0.202002	0.733001	2.25e-21	5.4e-20	44
hsa04150 mTOR signaling pathway	0.200014	0.732043	2.29e-21	5.4e-20	52
hsa04960 Aldosterone-regulated sodium reabsorption	0.208143	0.7183	1.41e-20	3e-19	40
hsa03050 Proteasome	0.150962	0.639444	1.95e-16	3.76e-15	41
hsa05110 Vibrio cholerae infection	0.195865	0.623483	6.31e-16	1.12e-14	50
hsa05010 Alzheimer's disease	0.153657	0.608649	2e-15	3.26e-14	156
hsa04141 Protein processing in endoplasmic reticulum	0.149538	0.588648	1.62e-14	2.46e-13	161
hsa05016 Huntington's disease	0.162215	0.50863	2.56e-11	3.62e-10	175
hsa00650 Butanoate metabolism	0.256256	0.506041	4.85e-11	6.42e-10	29
hsa04966 Collecting duct acid secretion	0.252073	0.486535	2.89e-10	3.6e-09	23
hsa03018 RNA degradation	0.223492	0.470734	7.17e-10	8.45e-09	68
hsa04114 Oocyte meiosis	0.263427	0.466547	8.5e-10	9.49e-09	104
hsa00071 Fatty acid metabolism	0.255762	0.46733	1.03e-09	1.09e-08	40
hsa05215 Prostate cancer	0.283178	0.43487	9.85e-09	9.94e-08	86
hsa04973 Carbohydrate digestion and absorption	0.286993	0.433768	1.24e-08	1.19e-07	37
hsa00010 Glycolysis / Gluconeogenesis	0.263531	0.39771	1.58e-07	1.46e-06	57
hsa04910 Insulin signaling pathway	0.287905	0.38277	3.78e-07	3.33e-06	126
hsa03040 Spliceosome	0.226261	0.381617	4.27e-07	3.62e-06	125
hsa00280 Valine, leucine and isoleucine degradation	0.262072	0.376506	7.08e-07	5.77e-06	44
hsa03008 Ribosome biogenesis in eukaryotes	0.256359	0.357141	2.14e-06	1.68e-05	73
hsa04310 Wnt signaling pathway	0.298171	0.335157	7.36e-06	5.57e-05	133
hsa04260 Cardiac muscle contraction	0.300307	0.320769	1.78e-05	0.000130242	69
hsa04914 Progesterone-mediated oocyte maturation	0.32547	0.306818	3.73e-05	0.000263329	83
hsa04962 Vasopressin-regulated water reabsorption	0.303617	0.304012	4.85e-05	0.000331852	39
hsa04110 Cell cycle	0.296856	0.295693	6.67e-05	0.000441662	124
hsa05120 Epithelial cell signaling in Helicobacter pylori infection	0.30088	0.289765	9.56e-05	0.00061429	62
hsa00310 Lysine degradation	0.312445	0.278646	0.000175062	0.00109156	43
hsa00051 Fructose and mannose metabolism	0.335284	0.264542	0.00035082	0.00212497	32
hsa04520 Adherens junction	0.304247	0.253071	0.000557971	0.00328583	72
hsa00020 Citrate cycle (TCA cycle)	0.302997	0.251478	0.00068635	0.0039326	29
hsa04810 Regulation of actin cytoskeleton	0.321144	0.238535	0.00101626	0.00566968	194
hsa04710 Circadian rhythm - mammal	0.337452	0.229885	0.00170043	0.00924336	22
hsa04940 Type I diabetes mellitus	0.357566	0.223942	0.00201671	0.0106886	34
hsa04730 Long-term depression	0.346852	0.218427	0.00243958	0.0126144	64
hsa04070 Phosphatidylinositol signaling system	0.355442	0.216546	0.00259742	0.0131108	71
hsa04540 Gap junction	0.348436	0.211914	0.0031084	0.0153251	80
hsa05323 Rheumatoid arthritis	0.343632	0.209429	0.00344692	0.0166079	73
hsa00510 N-Glycan biosynthesis	0.332891	0.206121	0.00402757	0.0189743	49
hsa00410 beta-Alanine metabolism	0.330767	0.202172	0.00509473	0.0234801	20
hsa04146 Peroxisome	0.334758	0.198252	0.00528877	0.0238557	79
hsa03430 Mismatch repair	0.34315	0.198543	0.00545666	0.0241003	23
hsa00970 Aminoacyl-tRNA biosynthesis	0.296319	0.191629	0.00717862	0.0310585	41
hsa04120 Ubiquitin mediated proteolysis	0.314418	0.184986	0.00843741	0.0357746	134
hsa03020 RNA polymerase	0.333425	0.185776	0.0088384	0.03674	29
hsa05214 Glioma	0.360353	0.17784	0.0109382	0.0445942	61
hsa05216 Thyroid cancer	0.365452	0.178183	0.0111737	0.0446946	28
hsa04115 p53 signaling pathway	0.357351	0.171366	0.0136189	0.0534667	67
hsa04666 Fc gamma R-mediated phagocytosis	0.37738	0.165286	0.0163354	0.0629657	91
hsa03015 mRNA surveillance pathway	0.3507	0.164013	0.0171323	0.0648579	77
hsa04340 Hedgehog signaling pathway	0.389528	0.146715	0.0293355	0.109107	43
hsa03410 Base excision repair	0.364071	0.139683	0.0368774	0.134793	33
hsa04130 SNARE interactions in vesicular transport	0.357622	0.136341	0.040443	0.145321	34
hsa00052 Galactose metabolism	0.381711	0.135851	0.0411736	0.14548	23
hsa03420 Nucleotide excision repair	0.359309	0.129239	0.0482288	0.167615	43
hsa04360 Axon guidance	0.379615	0.127217	0.0499658	0.170851	121
hsa05213 Endometrial cancer	0.376064	0.12256	0.0572295	0.192582	52
hsa01040 Biosynthesis of unsaturated fatty acids	0.374478	0.120638	0.0623224	0.206443	21
hsa04720 Long-term potentiation	0.381398	0.118369	0.0635418	0.207244	59
hsa00630 Glyoxylate and dicarboxylate metabolism	0.370603	0.112794	0.076182	0.244706	18
hsa04742 Taste transduction	0.405939	0.10756	0.0829104	0.258325	34
hsa05130 Pathogenic Escherichia coli infection	0.312315	0.107961	0.0832442	0.258325	52
hsa00640 Propanoate metabolism	0.349235	0.108604	0.0840775	0.258325	30
hsa04145 Phagosome	0.349731	0.104727	0.0880637	0.266707	137
hsa04972 Pancreatic secretion	0.399539	0.102901	0.0918944	0.274389	91
hsa03022 Basal transcription factors	0.384647	0.0997428	0.100158	0.294911	34
hsa05143 African trypanosomiasis	0.419877	0.0981714	0.10322	0.299762	29
hsa00430 Taurine and hypotaurine metabolism	0.424182	0.0978015	0.107062	0.306718	10
hsa05218 Melanoma	0.398033	0.0827671	0.142618	0.403133	64
hsa04350 TGF-beta signaling pathway	0.3869	0.0799105	0.151194	0.415034	82
hsa00380 Tryptophan metabolism	0.390822	0.0795708	0.153979	0.415034	39
hsa00120 Primary bile acid biosynthesis	0.41574	0.0791244	0.155528	0.415034	14
hsa05223 Non-small cell lung cancer	0.398295	0.0784646	0.156128	0.415034	53
hsa00030 Pentose phosphate pathway	0.383526	0.0788994	0.156617	0.415034	25
hsa05212 Pancreatic cancer	0.394682	0.0712457	0.179492	0.466369	69
hsa05014 Amyotrophic lateral sclerosis (ALS)	0.39629	0.0710695	0.180388	0.466369	49
hsa03440 Homologous recombination	0.400276	0.0680667	0.19093	0.487675	28
hsa00240 Pyrimidine metabolism	0.37948	0.0664214	0.195423	0.49321	95
hsa04370 VEGF signaling pathway	0.40565	0.0645498	0.202613	0.505341	70
hsa00500 Starch and sucrose metabolism	0.41497	0.0630657	0.20854	0.514076	38
hsa04970 Salivary secretion	0.41495	0.0621665	0.210973	0.514096	72
hsa05211 Renal cell carcinoma	0.381705	0.0597113	0.220834	0.52438	70
hsa04912 GnRH signaling pathway	0.407829	0.0594453	0.221285	0.52438	87
hsa04270 Vascular smooth muscle contraction	0.410245	0.059079	0.222614	0.52438	97
hsa00290 Valine, leucine and isoleucine biosynthesis	0.398664	0.0589359	0.231639	0.539643	10
hsa05020 Prion diseases	0.405611	0.0531534	0.247989	0.568223	28
hsa00620 Pyruvate metabolism	0.383038	0.0529656	0.249268	0.568223	37
hsa04920 Adipocytokine signaling pathway	0.406984	0.0513968	0.253814	0.572432	64
hsa00520 Amino sugar and nucleotide sugar metabolism	0.401438	0.0285993	0.357071	0.791294	45
hsa00230 Purine metabolism	0.385124	0.02803	0.358322	0.791294	153
hsa03450 Non-homologous end-joining	0.406963	0.0162678	0.418112	0.913811	13
hsa04320 Dorso-ventral axis formation	0.424525	0.0132598	0.432361	0.935312	24
hsa05160 Hepatitis C	0.407188	0.00664989	0.46574	0.997342	117
hsa04664 Fc epsilon RI signaling pathway	0.430404	-0.00302014	0.515393	1	72
hsa03030 DNA replication	0.418676	-0.00800701	0.523977	1	36
hsa05210 Colorectal cancer	0.413654	-0.00503916	0.525746	1	62
hsa00562 Inositol phosphate metabolism	0.424623	-0.00540926	0.52746	1	54
hsa04142 Lysosome	0.353645	-0.0227284	0.615247	1	117
hsa00450 Selenocompound metabolism	0.427992	-0.0269581	0.631007	1	17
hsa05100 Bacterial invasion of epithelial cells	0.408553	-0.0363737	0.680824	1	69
hsa04530 Tight junction	0.420145	-0.0380867	0.689014	1	121
hsa04510 Focal adhesion	0.41701	-0.0391389	0.694194	1	190
hsa05219 Bladder cancer	0.440185	-0.0397455	0.694729	1	42
hsa00860 Porphyrin and chlorophyll metabolism	0.431719	-0.0436645	0.711691	1	29
hsa05221 Acute myeloid leukemia	0.442826	-0.0449904	0.718916	1	55
hsa05220 Chronic myeloid leukemia	0.422173	-0.0501676	0.740895	1	72
hsa00670 One carbon pool by folate	0.435399	-0.0504461	0.741377	1	18
hsa00100 Steroid biosynthesis	0.380817	-0.0555604	0.756953	1	17
hsa00600 Sphingolipid metabolism	0.442957	-0.0580239	0.771318	1	37
hsa04330 Notch signaling pathway	0.44413	-0.0582954	0.773031	1	43
hsa04210 Apoptosis	0.447549	-0.062196	0.789082	1	80
hsa00563 Glycosylphosphatidylinositol(GPI)-anchor biosynthesis	0.415069	-0.0655385	0.798641	1	24
hsa05200 Pathways in cancer	0.439787	-0.0647504	0.799133	1	302
hsa04623 Cytosolic DNA-sensing pathway	0.456979	-0.0662441	0.802552	1	37
hsa05146 Amoebiasis	0.452926	-0.0691884	0.814058	1	87
hsa00592 alpha-Linolenic acid metabolism	0.484626	-0.0740827	0.825836	1	16
hsa00270 Cysteine and methionine metabolism	0.447945	-0.0741197	0.828872	1	34
hsa04144 Endocytosis	0.449909	-0.0804437	0.851045	1	194
hsa05142 Chagas disease (American trypanosomiasis)	0.459609	-0.0873766	0.870434	1	88
hsa02010 ABC transporters	0.466952	-0.093524	0.885148	1	43
hsa00533 Glycosaminoglycan biosynthesis - keratan sulfate	0.479519	-0.0978835	0.892527	1	14
hsa04122 Sulfur relay system	0.488722	-0.100503	0.896516	1	10
hsa00830 Retinol metabolism	0.479984	-0.0982091	0.896586	1	41
hsa05131 Shigellosis	0.419452	-0.0984937	0.896949	1	58
hsa04614 Renin-angiotensin system	0.476445	-0.111854	0.920294	1	12
hsa05222 Small cell lung cancer	0.467827	-0.110734	0.923633	1	84
hsa04062 Chemokine signaling pathway	0.467732	-0.113522	0.928909	1	146
hsa04660 T cell receptor signaling pathway	0.456833	-0.116663	0.933879	1	93
hsa04916 Melanogenesis	0.474576	-0.116663	0.934134	1	84
hsa04622 RIG-I-like receptor signaling pathway	0.466751	-0.125538	0.947092	1	55
hsa00250 Alanine, aspartate and glutamate metabolism	0.467018	-0.128865	0.950716	1	31
hsa00590 Arachidonic acid metabolism	0.486944	-0.128887	0.951415	1	50
hsa00980 Metabolism of xenobiotics by cytochrome P450	0.480141	-0.135572	0.959545	1	52
hsa00770 Pantothenate and CoA biosynthesis	0.48416	-0.141578	0.963621	1	15
hsa04630 Jak-STAT signaling pathway	0.478623	-0.140542	0.965344	1	119
hsa05217 Basal cell carcinoma	0.488922	-0.142808	0.966683	1	44
hsa04621 NOD-like receptor signaling pathway	0.481925	-0.14274	0.966891	1	52
hsa00053 Ascorbate and aldarate metabolism	0.484999	-0.146035	0.967876	1	14
hsa00534 Glycosaminoglycan biosynthesis - heparan sulfate	0.498974	-0.144534	0.967895	1	25
hsa04744 Phototransduction	0.49634	-0.145636	0.968059	1	18
hsa00565 Ether lipid metabolism	0.491917	-0.14587	0.969316	1	32
hsa04380 Osteoclast differentiation	0.476756	-0.146061	0.970449	1	113
hsa04662 B cell receptor signaling pathway	0.472155	-0.146787	0.970642	1	69
hsa00740 Riboflavin metabolism	0.477628	-0.153065	0.97241	1	10
hsa04620 Toll-like receptor signaling pathway	0.47701	-0.148612	0.972412	1	79
hsa04964 Proximal tubule bicarbonate reclamation	0.506798	-0.150138	0.972504	1	22
hsa00920 Sulfur metabolism	0.479323	-0.15269	0.972671	1	12
hsa00601 Glycosphingolipid biosynthesis - lacto and neolacto series	0.50517	-0.153489	0.975169	1	24
hsa04670 Leukocyte transendothelial migration	0.46686	-0.159327	0.980231	1	108
hsa00140 Steroid hormone biosynthesis	0.501878	-0.164331	0.982517	1	38
hsa00511 Other glycan degradation	0.446145	-0.169762	0.983212	1	15
hsa00900 Terpenoid backbone biosynthesis	0.444617	-0.172365	0.984742	1	15
hsa00591 Linoleic acid metabolism	0.522285	-0.172273	0.98615	1	25
hsa00040 Pentose and glucuronate interconversions	0.499452	-0.179005	0.988708	1	20
hsa00514 Other types of O-glycan biosynthesis	0.509895	-0.179626	0.989465	1	32
hsa00604 Glycosphingolipid biosynthesis - ganglio series	0.495505	-0.192756	0.992659	1	15
hsa00360 Phenylalanine metabolism	0.510099	-0.193583	0.993129	1	16
hsa00983 Drug metabolism - other enzymes	0.511205	-0.197236	0.994346	1	34
hsa04971 Gastric acid secretion	0.512661	-0.203921	0.995742	1	64
hsa00480 Glutathione metabolism	0.478478	-0.20533	0.99585	1	46
hsa04976 Bile secretion	0.515449	-0.205483	0.995986	1	64
hsa05412 Arrhythmogenic right ventricular cardiomyopathy (ARVC)	0.499982	-0.210742	0.996692	1	65
hsa04020 Calcium signaling pathway	0.512607	-0.211007	0.996822	1	147
hsa04974 Protein digestion and absorption	0.511565	-0.212689	0.996964	1	72
hsa00350 Tyrosine metabolism	0.516206	-0.225461	0.998125	1	38
hsa04010 MAPK signaling pathway	0.493301	-0.224629	0.99818	1	240
hsa05145 Toxoplasmosis	0.507248	-0.227641	0.998371	1	122
hsa04722 Neurotrophin signaling pathway	0.50033	-0.244912	0.999222	1	119
hsa04977 Vitamin digestion and absorption	0.53598	-0.249105	0.999266	1	23
hsa04975 Fat digestion and absorption	0.542698	-0.250451	0.999359	1	36
hsa05410 Hypertrophic cardiomyopathy (HCM)	0.524028	-0.257226	0.999547	1	70
hsa00561 Glycerolipid metabolism	0.520694	-0.259645	0.999579	1	44
hsa00603 Glycosphingolipid biosynthesis - globo series	0.526623	-0.265925	0.999616	1	14
hsa00531 Glycosaminoglycan degradation	0.518997	-0.272808	0.999733	1	17
hsa03320 PPAR signaling pathway	0.536135	-0.269204	0.999743	1	61
hsa00340 Histidine metabolism	0.532053	-0.27581	0.999789	1	28
hsa00260 Glycine, serine and threonine metabolism	0.529158	-0.278307	0.999816	1	30
hsa00564 Glycerophospholipid metabolism	0.540051	-0.279157	0.999843	1	75
hsa05340 Primary immunodeficiency	0.551994	-0.281705	0.999843	1	26
hsa04012 ErbB signaling pathway	0.522172	-0.284194	0.999878	1	87
hsa00760 Nicotinate and nicotinamide metabolism	0.533543	-0.290127	0.999895	1	23
hsa00512 Mucin type O-Glycan biosynthesis	0.538403	-0.296633	0.999927	1	28
hsa05310 Asthma	0.569003	-0.300101	0.999933	1	22
hsa00532 Glycosaminoglycan biosynthesis - chondroitin sulfate	0.54975	-0.303721	0.999946	1	20
hsa00982 Drug metabolism - cytochrome P450	0.539993	-0.302702	0.999951	1	51
hsa04672 Intestinal immune network for IgA production	0.583694	-0.360038	0.999998	1	34
hsa04650 Natural killer cell mediated cytotoxicity	0.568749	-0.372276	0.999999	1	101
hsa05140 Leishmaniasis	0.560142	-0.374599	0.999999	1	65
hsa00330 Arginine and proline metabolism	0.560065	-0.411788	1	1	52
hsa05414 Dilated cardiomyopathy	0.583199	-0.414855	1	1	77
hsa00910 Nitrogen metabolism	0.591987	-0.421135	1	1	22
hsa05150 Staphylococcus aureus infection	0.586989	-0.438111	1	1	48
hsa05322 Systemic lupus erythematosus	0.57192	-0.443868	1	1	77
hsa05144 Malaria	0.591518	-0.463531	1	1	44
hsa04740 Olfactory transduction	0.521818	-0.463393	1	1	104
hsa04514 Cell adhesion molecules (CAMs)	0.586014	-0.465766	1	1	110
hsa05416 Viral myocarditis	0.59087	-0.489731	1	1	59
hsa04060 Cytokine-cytokine receptor interaction	0.54455	-0.503168	1	1	181
hsa04640 Hematopoietic cell lineage	0.628944	-0.55095	1	1	68
hsa04080 Neuroactive ligand-receptor interaction	0.556605	-0.615731	1	1	189
hsa04612 Antigen processing and presentation	0.621815	-0.678494	1	1	60
hsa05320 Autoimmune thyroid disease	0.696429	-0.825832	1	1	34
hsa05330 Allograft rejection	0.700149	-0.835615	1	1	29
hsa05332 Graft-versus-host disease	0.702601	-0.838582	1	1	27
hsa04512 ECM-receptor interaction	0.622084	-0.650975	1	1	78
hsa04610 Complement and coagulation cascades	0.668701	-0.651612	1	1	64
hsa00232 Caffeine metabolism	NA	NA	NA	NA	3
hsa01100 Metabolic pathways	NA	NA	NA	NA	1050
hsa00300 Lysine biosynthesis	NA	NA	NA	NA	3
hsa00130 Ubiquinone and other terpenoid-quinone biosynthesis	NA	NA	NA	NA	7
hsa00062 Fatty acid elongation in mitochondria	NA	NA	NA	NA	8
hsa00785 Lipoic acid metabolism	NA	NA	NA	NA	3
hsa00460 Cyanoamino acid metabolism	NA	NA	NA	NA	6
hsa00472 D-Arginine and D-ornithine metabolism	NA	NA	NA	NA	1
hsa00790 Folate biosynthesis	NA	NA	NA	NA	8
hsa00061 Fatty acid biosynthesis	NA	NA	NA	NA	5
hsa00400 Phenylalanine, tyrosine and tryptophan biosynthesis	NA	NA	NA	NA	5
hsa00524 Butirosin and neomycin biosynthesis	NA	NA	NA	NA	3
hsa00730 Thiamine metabolism	NA	NA	NA	NA	4
hsa00471 D-Glutamine and D-glutamate metabolism	NA	NA	NA	NA	4
hsa00750 Vitamin B6 metabolism	NA	NA	NA	NA	6
hsa00780 Biotin metabolism	NA	NA	NA	NA	2
hsa00072 Synthesis and degradation of ketone bodies	NA	NA	NA	NA	9

## Sheet: Delta.downregulated.pathways
KEGG Pathway	p.geomean	stat.mean	p.val	q.val	set.size
hsa00190 Oxidative phosphorylation	0.0696559	-0.946806	8.94e-05	0.0188318	126
hsa05012 Parkinson's disease	0.0796111	-0.90172	0.000177659	0.0188318	126
hsa05016 Huntington's disease	0.0923763	-0.781317	0.000959843	0.0678289	175
hsa05010 Alzheimer's disease	0.114023	-0.746141	0.00151775	0.0804408	156
hsa00230 Purine metabolism	0.186471	-0.668577	0.00384634	0.163085	153
hsa04114 Oocyte meiosis	0.215618	-0.593951	0.00900221	0.308269	104
hsa05130 Pathogenic Escherichia coli infection	0.177997	-0.586993	0.0103219	0.308269	52
hsa00010 Glycolysis / Gluconeogenesis	0.216457	-0.572148	0.0116328	0.308269	57
hsa00500 Starch and sucrose metabolism	0.267691	-0.526362	0.0183521	0.427095	38
hsa01040 Biosynthesis of unsaturated fatty acids	0.251368	-0.521883	0.020146	0.427095	21
hsa04950 Maturity onset diabetes of the young	0.226909	-0.5085	0.023851	0.459674	22
hsa05214 Glioma	0.264693	-0.475813	0.0292089	0.494774	61
hsa00860 Porphyrin and chlorophyll metabolism	0.25045	-0.466316	0.033129	0.494774	29
hsa00563 Glycosylphosphatidylinositol(GPI)-anchor biosynthesis	0.261768	-0.460812	0.0348973	0.494774	24
hsa03020 RNA polymerase	0.249859	-0.460579	0.0350076	0.494774	29
hsa00020 Citrate cycle (TCA cycle)	0.235265	-0.442943	0.0414211	0.51462	29
hsa05110 Vibrio cholerae infection	0.244743	-0.432123	0.0436345	0.51462	50
hsa04141 Protein processing in endoplasmic reticulum	0.170704	-0.422594	0.0465461	0.51462	161
hsa04142 Lysosome	0.233215	-0.408956	0.0517161	0.51462	117
hsa00511 Other glycan degradation	0.282348	-0.416805	0.0523946	0.51462	15
hsa00330 Arginine and proline metabolism	0.278011	-0.4082	0.0526081	0.51462	52
hsa03010 Ribosome	0.0518302	-0.41036	0.0546591	0.51462	88
hsa03018 RNA degradation	0.232139	-0.396838	0.057991	0.51462	68
hsa04940 Type I diabetes mellitus	0.291598	-0.396018	0.0585146	0.51462	34
hsa00630 Glyoxylate and dicarboxylate metabolism	0.276123	-0.396798	0.0606863	0.51462	18
hsa00900 Terpenoid backbone biosynthesis	0.256531	-0.395714	0.0635889	0.518494	15
hsa04730 Long-term depression	0.290674	-0.368875	0.0711533	0.558104	64
hsa00620 Pyruvate metabolism	0.254292	-0.367037	0.0737119	0.558104	37
hsa03050 Proteasome	0.146381	-0.363112	0.0781153	0.57105	41
hsa04973 Carbohydrate digestion and absorption	0.315232	-0.336976	0.0906931	0.627526	37
hsa00052 Galactose metabolism	0.317106	-0.337255	0.0917608	0.627526	23
hsa00240 Pyrimidine metabolism	0.298277	-0.319753	0.101436	0.663477	95
hsa00740 Riboflavin metabolism	0.315083	-0.324118	0.106129	0.663477	10
hsa00520 Amino sugar and nucleotide sugar metabolism	0.306353	-0.31099	0.108916	0.663477	45
hsa00071 Fatty acid metabolism	0.303709	-0.31017	0.109536	0.663477	40
hsa00450 Selenocompound metabolism	0.328096	-0.308788	0.112938	0.665078	17
hsa04810 Regulation of actin cytoskeleton	0.302433	-0.291428	0.122277	0.700614	194
hsa04520 Adherens junction	0.318413	-0.27483	0.137061	0.728169	72
hsa00640 Propanoate metabolism	0.2689	-0.274963	0.140275	0.728169	30
hsa05218 Melanoma	0.345608	-0.267982	0.142963	0.728169	64
hsa03320 PPAR signaling pathway	0.340468	-0.265086	0.145778	0.728169	61
hsa04966 Collecting duct acid secretion	0.31822	-0.264664	0.149129	0.728169	23
hsa03420 Nucleotide excision repair	0.317658	-0.261744	0.149532	0.728169	43
hsa04740 Olfactory transduction	0.270641	-0.255532	0.15473	0.728169	104
hsa03008 Ribosome biogenesis in eukaryotes	0.253112	-0.254938	0.154922	0.728169	73
hsa04260 Cardiac muscle contraction	0.326135	-0.246787	0.16319	0.728169	69
hsa04974 Protein digestion and absorption	0.358347	-0.241405	0.168085	0.728169	72
hsa04960 Aldosterone-regulated sodium reabsorption	0.334118	-0.242064	0.168429	0.728169	40
hsa00970 Aminoacyl-tRNA biosynthesis	0.299223	-0.242295	0.169852	0.728169	41
hsa03450 Non-homologous end-joining	0.335596	-0.243344	0.172108	0.728169	13
hsa00920 Sulfur metabolism	0.347376	-0.240142	0.175173	0.728169	12
hsa05215 Prostate cancer	0.341942	-0.229144	0.18049	0.735844	86
hsa00510 N-Glycan biosynthesis	0.340612	-0.2257	0.184827	0.739308	49
hsa00980 Metabolism of xenobiotics by cytochrome P450	0.345864	-0.219606	0.191125	0.750344	52
hsa04930 Type II diabetes mellitus	0.323876	-0.216766	0.195373	0.753076	44
hsa05131 Shigellosis	0.315221	-0.212864	0.199341	0.754075	58
hsa04914 Progesterone-mediated oocyte maturation	0.355881	-0.205965	0.205953	0.754075	83
hsa05219 Bladder cancer	0.354271	-0.205293	0.207674	0.754075	42
hsa04670 Leukocyte transendothelial migration	0.356912	-0.201345	0.210961	0.754075	108
hsa04310 Wnt signaling pathway	0.33732	-0.199216	0.213418	0.754075	133
hsa00051 Fructose and mannose metabolism	0.364991	-0.182487	0.235439	0.770743	32
hsa03022 Basal transcription factors	0.352647	-0.179487	0.237919	0.770743	34
hsa04970 Salivary secretion	0.389796	-0.17808	0.238918	0.770743	72
hsa03430 Mismatch repair	0.345601	-0.179472	0.239763	0.770743	23
hsa04910 Insulin signaling pathway	0.352701	-0.175756	0.241709	0.770743	126
hsa04110 Cell cycle	0.340114	-0.174239	0.243691	0.770743	124
hsa00830 Retinol metabolism	0.365439	-0.174144	0.244425	0.770743	41
hsa03013 RNA transport	0.295721	-0.171496	0.247219	0.770743	143
hsa05100 Bacterial invasion of epithelial cells	0.345895	-0.162687	0.258644	0.781582	69
hsa04120 Ubiquitin mediated proteolysis	0.328379	-0.162033	0.258978	0.781582	134
hsa04744 Phototransduction	0.381461	-0.160344	0.264845	0.781582	18
hsa04144 Endocytosis	0.342631	-0.156973	0.265443	0.781582	194
hsa00030 Pentose phosphate pathway	0.368143	-0.15315	0.272854	0.792398	25
hsa04540 Gap junction	0.384629	-0.145973	0.280387	0.80327	80
hsa05323 Rheumatoid arthritis	0.379355	-0.138568	0.29059	0.804461	73
hsa00770 Pantothenate and CoA biosynthesis	0.394828	-0.140251	0.291057	0.804461	15
hsa04530 Tight junction	0.355062	-0.135078	0.295329	0.804461	121
hsa04140 Regulation of autophagy	0.369504	-0.134029	0.299021	0.804461	23
hsa04146 Peroxisome	0.361224	-0.131916	0.299776	0.804461	79
hsa04964 Proximal tubule bicarbonate reclamation	0.394236	-0.123981	0.31119	0.807638	22
hsa00140 Steroid hormone biosynthesis	0.384936	-0.121974	0.314102	0.807638	38
hsa03060 Protein export	0.276706	-0.124567	0.322417	0.807638	23
hsa00983 Drug metabolism - other enzymes	0.391368	-0.114577	0.324954	0.807638	34
hsa04145 Phagosome	0.328316	-0.11072	0.329002	0.807638	137
hsa00604 Glycosphingolipid biosynthesis - ganglio series	0.383727	-0.11163	0.330694	0.807638	15
hsa04710 Circadian rhythm - mammal	0.367408	-0.11128	0.33122	0.807638	22
hsa00982 Drug metabolism - cytochrome P450	0.381654	-0.104801	0.338501	0.807638	51
hsa03440 Homologous recombination	0.381345	-0.104092	0.34061	0.807638	28
hsa00480 Glutathione metabolism	0.377742	-0.102305	0.342308	0.807638	46
hsa00600 Sphingolipid metabolism	0.395868	-0.0978988	0.349141	0.807638	37
hsa05216 Thyroid cancer	0.402783	-0.0961359	0.351896	0.807638	28
hsa03030 DNA replication	0.37744	-0.0977576	0.352123	0.807638	36
hsa03040 Spliceosome	0.255154	-0.0948485	0.354294	0.807638	125
hsa00534 Glycosaminoglycan biosynthesis - heparan sulfate	0.417708	-0.0848267	0.368628	0.810353	25
hsa04720 Long-term potentiation	0.39341	-0.0840565	0.369223	0.810353	59
hsa05120 Epithelial cell signaling in Helicobacter pylori infection	0.377519	-0.0830481	0.370563	0.810353	62
hsa00410 beta-Alanine metabolism	0.347027	-0.07919	0.377697	0.810353	20
hsa04070 Phosphatidylinositol signaling system	0.417378	-0.074669	0.382908	0.810353	71
hsa04150 mTOR signaling pathway	0.392516	-0.0737567	0.384495	0.810353	52
hsa00531 Glycosaminoglycan degradation	0.404468	-0.0732092	0.386304	0.810353	17
hsa00350 Tyrosine metabolism	0.409489	-0.0713809	0.38812	0.810353	38
hsa00260 Glycine, serine and threonine metabolism	0.393004	-0.065594	0.396672	0.810353	30
hsa00290 Valine, leucine and isoleucine biosynthesis	0.392053	-0.0640308	0.399375	0.810353	10
hsa00562 Inositol phosphate metabolism	0.40775	-0.063752	0.399932	0.810353	54
hsa00053 Ascorbate and aldarate metabolism	0.41485	-0.0617117	0.404071	0.810353	14
hsa00280 Valine, leucine and isoleucine degradation	0.33075	-0.0536668	0.415623	0.810353	44
hsa00603 Glycosphingolipid biosynthesis - globo series	0.420346	-0.05416	0.416211	0.810353	14
hsa04270 Vascular smooth muscle contraction	0.413307	-0.0519607	0.417915	0.810353	97
hsa04975 Fat digestion and absorption	0.429746	-0.0478828	0.42452	0.810353	36
hsa04977 Vitamin digestion and absorption	0.431716	-0.0468951	0.426224	0.810353	23
hsa04350 TGF-beta signaling pathway	0.413687	-0.0456942	0.427861	0.810353	82
hsa04510 Focal adhesion	0.398815	-0.0437068	0.430996	0.810353	190
hsa00380 Tryptophan metabolism	0.392437	-0.043315	0.431933	0.810353	39
hsa04115 p53 signaling pathway	0.397419	-0.0338121	0.446616	0.825218	67
hsa00512 Mucin type O-Glycan biosynthesis	0.41111	-0.0323182	0.449497	0.825218	28
hsa00910 Nitrogen metabolism	0.424616	-0.0286173	0.454967	0.825218	22
hsa00514 Other types of O-glycan biosynthesis	0.424356	-0.0287564	0.455427	0.825218	32
hsa00760 Nicotinate and nicotinamide metabolism	0.393632	-0.023095	0.463233	0.832248	23
hsa00100 Steroid biosynthesis	0.360528	-0.0176615	0.471998	0.83421	17
hsa00360 Phenylalanine metabolism	0.422155	-0.0177012	0.472658	0.83421	16
hsa04614 Renin-angiotensin system	0.43122	-0.0126226	0.479169	0.83421	12
hsa04020 Calcium signaling pathway	0.433081	-0.0124701	0.480064	0.83421	147
hsa03015 mRNA surveillance pathway	0.403275	-0.00714269	0.488802	0.835668	77
hsa00340 Histidine metabolism	0.433354	-0.00638043	0.489692	0.835668	28
hsa05143 African trypanosomiasis	0.452491	-0.00425103	0.492729	0.835668	29
hsa05146 Amoebiasis	0.445962	0.00319381	0.505006	0.842578	87
hsa05222 Small cell lung cancer	0.436384	0.00677186	0.510667	0.842578	84
hsa00040 Pentose and glucuronate interconversions	0.441185	0.0102179	0.515857	0.842578	20
hsa00592 alpha-Linolenic acid metabolism	0.455468	0.011612	0.518524	0.842578	16
hsa00591 Linoleic acid metabolism	0.447566	0.0130624	0.519746	0.842578	25
hsa00120 Primary bile acid biosynthesis	0.438818	0.0151054	0.522596	0.842578	14
hsa04623 Cytosolic DNA-sensing pathway	0.437074	0.0218781	0.534635	0.842578	37
hsa05213 Endometrial cancer	0.430807	0.0239239	0.538034	0.842578	52
hsa04916 Melanogenesis	0.443943	0.0253245	0.540056	0.842578	84
hsa05200 Pathways in cancer	0.440331	0.0275948	0.543872	0.842578	302
hsa05014 Amyotrophic lateral sclerosis (ALS)	0.420472	0.0292979	0.546123	0.842578	49
hsa05160 Hepatitis C	0.42817	0.0340217	0.553793	0.842578	117
hsa04972 Pancreatic secretion	0.46364	0.0406331	0.56449	0.842578	91
hsa04912 GnRH signaling pathway	0.441528	0.0411116	0.565302	0.842578	87
hsa05223 Non-small cell lung cancer	0.440693	0.0432964	0.568398	0.842578	53
hsa00565 Ether lipid metabolism	0.461409	0.0485208	0.576138	0.842578	32
hsa05144 Malaria	0.425977	0.0539553	0.583524	0.842578	44
hsa04664 Fc epsilon RI signaling pathway	0.435668	0.0532831	0.58441	0.842578	72
hsa03410 Base excision repair	0.43464	0.0537016	0.584722	0.842578	33
hsa05145 Toxoplasmosis	0.435896	0.055251	0.587209	0.842578	122
hsa04666 Fc gamma R-mediated phagocytosis	0.469069	0.0586471	0.592165	0.842578	91
hsa00533 Glycosaminoglycan biosynthesis - keratan sulfate	0.459818	0.0615493	0.594982	0.842578	14
hsa04330 Notch signaling pathway	0.445327	0.0618222	0.596328	0.842578	43
hsa04130 SNARE interactions in vesicular transport	0.421474	0.0636855	0.597544	0.842578	34
hsa00270 Cysteine and methionine metabolism	0.442693	0.062672	0.597922	0.842578	34
hsa04370 VEGF signaling pathway	0.46149	0.0636608	0.600138	0.842578	70
hsa04360 Axon guidance	0.453028	0.0701118	0.610041	0.850847	121
hsa04122 Sulfur relay system	0.489966	0.0769124	0.61658	0.851204	10
hsa00310 Lysine degradation	0.42938	0.0800078	0.623799	0.851204	43
hsa04722 Neurotrophin signaling pathway	0.456262	0.0809738	0.626601	0.851204	119
hsa00670 One carbon pool by folate	0.455906	0.0838564	0.629668	0.851204	18
hsa05212 Pancreatic cancer	0.454001	0.0836256	0.630373	0.851204	69
hsa00564 Glycerophospholipid metabolism	0.478937	0.0906619	0.641021	0.859752	75
hsa00590 Arachidonic acid metabolism	0.449393	0.0932672	0.644814	0.859752	50
hsa00430 Taurine and hypotaurine metabolism	0.502408	0.108808	0.663141	0.878662	10
hsa05217 Basal cell carcinoma	0.472175	0.110929	0.669936	0.880038	44
hsa04622 RIG-I-like receptor signaling pathway	0.481287	0.114094	0.675254	0.880038	55
hsa00532 Glycosaminoglycan biosynthesis - chondroitin sulfate	0.46874	0.117356	0.677808	0.880038	20
hsa04512 ECM-receptor interaction	0.403849	0.118444	0.680784	0.880038	78
hsa05332 Graft-versus-host disease	0.412433	0.123802	0.686416	0.88194	27
hsa00250 Alanine, aspartate and glutamate metabolism	0.473965	0.125855	0.690902	0.882357	31
hsa05220 Chronic myeloid leukemia	0.470827	0.143872	0.716592	0.897006	72
hsa04962 Vasopressin-regulated water reabsorption	0.467773	0.14481	0.717114	0.897006	39
hsa00650 Butanoate metabolism	0.467877	0.147732	0.719841	0.897006	29
hsa05142 Chagas disease (American trypanosomiasis)	0.498865	0.152248	0.728197	0.897006	88
hsa05412 Arrhythmogenic right ventricular cardiomyopathy (ARVC)	0.464556	0.157138	0.733772	0.897006	65
hsa04612 Antigen processing and presentation	0.395329	0.158362	0.733848	0.897006	60
hsa04976 Bile secretion	0.504086	0.160012	0.737837	0.897006	64
hsa04060 Cytokine-cytokine receptor interaction	0.396055	0.163181	0.742672	0.897006	181
hsa04621 NOD-like receptor signaling pathway	0.502071	0.167612	0.747823	0.897006	52
hsa05410 Hypertrophic cardiomyopathy (HCM)	0.481266	0.168965	0.74942	0.897006	70
hsa00561 Glycerolipid metabolism	0.469726	0.170404	0.7501	0.897006	44
hsa04630 Jak-STAT signaling pathway	0.497585	0.174681	0.756997	0.897006	119
hsa04920 Adipocytokine signaling pathway	0.495013	0.175288	0.757378	0.897006	64
hsa04380 Osteoclast differentiation	0.498631	0.1819	0.766063	0.902252	113
hsa05320 Autoimmune thyroid disease	0.431694	0.189495	0.772252	0.904516	34
hsa04062 Chemokine signaling pathway	0.509919	0.195128	0.78201	0.909342	146
hsa05020 Prion diseases	0.496195	0.199306	0.784951	0.909342	28
hsa00601 Glycosphingolipid biosynthesis - lacto and neolacto series	0.517607	0.210636	0.797354	0.912327	24
hsa05330 Allograft rejection	0.441066	0.216327	0.802348	0.912327	29
hsa04340 Hedgehog signaling pathway	0.515802	0.215712	0.803878	0.912327	43
hsa05140 Leishmaniasis	0.480252	0.215947	0.804741	0.912327	65
hsa04650 Natural killer cell mediated cytotoxicity	0.494381	0.233172	0.823537	0.924128	101
hsa04320 Dorso-ventral axis formation	0.512623	0.236966	0.824426	0.924128	24
hsa05416 Viral myocarditis	0.462527	0.238964	0.828228	0.924128	59
hsa04514 Cell adhesion molecules (CAMs)	0.494933	0.245808	0.836172	0.928107	110
hsa02010 ABC transporters	0.519268	0.253043	0.842222	0.92983	43
hsa04742 Taste transduction	0.541434	0.262687	0.851156	0.92983	34
hsa05310 Asthma	0.536508	0.266803	0.852401	0.92983	22
hsa05414 Dilated cardiomyopathy	0.511808	0.266285	0.855268	0.92983	77
hsa04672 Intestinal immune network for IgA production	0.543405	0.300141	0.881477	0.941095	34
hsa04620 Toll-like receptor signaling pathway	0.54451	0.30507	0.887882	0.941095	79
hsa04660 T cell receptor signaling pathway	0.508172	0.308613	0.890299	0.941095	93
hsa04210 Apoptosis	0.541348	0.309308	0.891117	0.941095	80
hsa04640 Hematopoietic cell lineage	0.513159	0.310137	0.891338	0.941095	68
hsa04971 Gastric acid secretion	0.58207	0.310917	0.892265	0.941095	64
hsa05211 Renal cell carcinoma	0.542497	0.331837	0.906666	0.95155	70
hsa04010 MAPK signaling pathway	0.557494	0.351369	0.91979	0.958997	240
hsa04610 Complement and coagulation cascades	0.555411	0.36918	0.92904	0.958997	64
hsa05322 Systemic lupus erythematosus	0.534886	0.377726	0.933517	0.958997	77
hsa04012 ErbB signaling pathway	0.562429	0.382573	0.936297	0.958997	87
hsa05221 Acute myeloid leukemia	0.568743	0.386822	0.937823	0.958997	55
hsa05150 Staphylococcus aureus infection	0.53956	0.395757	0.941082	0.958997	48
hsa04662 B cell receptor signaling pathway	0.550244	0.403279	0.945426	0.958997	69
hsa05210 Colorectal cancer	0.578332	0.42445	0.954285	0.959176	62
hsa04080 Neuroactive ligand-receptor interaction	0.44664	0.42528	0.954651	0.959176	189
hsa05340 Primary immunodeficiency	0.606658	0.441231	0.959376	0.959376	26
hsa00232 Caffeine metabolism	NA	NA	NA	NA	3
hsa01100 Metabolic pathways	NA	NA	NA	NA	1050
hsa00300 Lysine biosynthesis	NA	NA	NA	NA	3
hsa00130 Ubiquinone and other terpenoid-quinone biosynthesis	NA	NA	NA	NA	7
hsa00062 Fatty acid elongation in mitochondria	NA	NA	NA	NA	8
hsa00785 Lipoic acid metabolism	NA	NA	NA	NA	3
hsa00460 Cyanoamino acid metabolism	NA	NA	NA	NA	6
hsa00472 D-Arginine and D-ornithine metabolism	NA	NA	NA	NA	1
hsa00790 Folate biosynthesis	NA	NA	NA	NA	8
hsa00061 Fatty acid biosynthesis	NA	NA	NA	NA	5
hsa00400 Phenylalanine, tyrosine and tryptophan biosynthesis	NA	NA	NA	NA	5
hsa00524 Butirosin and neomycin biosynthesis	NA	NA	NA	NA	3
hsa00730 Thiamine metabolism	NA	NA	NA	NA	4
hsa00471 D-Glutamine and D-glutamate metabolism	NA	NA	NA	NA	4
hsa00750 Vitamin B6 metabolism	NA	NA	NA	NA	6
hsa00780 Biotin metabolism	NA	NA	NA	NA	2
hsa00072 Synthesis and degradation of ketone bodies	NA	NA	NA	NA	9

## Sheet: Delta.upregulated.pathways
KEGG Pathway	p.geomean	stat.mean	p.val	q.val	set.size
hsa05340 Primary immunodeficiency	0.291496	0.441231	0.0406243	0.999911	26
hsa04080 Neuroactive ligand-receptor interaction	0.192016	0.42528	0.0453488	0.999911	189
hsa05210 Colorectal cancer	0.279655	0.42445	0.0457147	0.999911	62
hsa04662 B cell receptor signaling pathway	0.269238	0.403279	0.0545741	0.999911	69
hsa05150 Staphylococcus aureus infection	0.271458	0.395757	0.058918	0.999911	48
hsa05221 Acute myeloid leukemia	0.292554	0.386822	0.0621772	0.999911	55
hsa04012 ErbB signaling pathway	0.292867	0.382573	0.0637029	0.999911	87
hsa05322 Systemic lupus erythematosus	0.27697	0.377726	0.066483	0.999911	77
hsa04610 Complement and coagulation cascades	0.296739	0.36918	0.0709603	0.999911	64
hsa04010 MAPK signaling pathway	0.306971	0.351369	0.0802095	0.999911	240
hsa05211 Renal cell carcinoma	0.307142	0.331837	0.093334	0.999911	70
hsa04971 Gastric acid secretion	0.34825	0.310917	0.107735	0.999911	64
hsa04640 Hematopoietic cell lineage	0.302052	0.310137	0.108662	0.999911	68
hsa04210 Apoptosis	0.321015	0.309308	0.108883	0.999911	80
hsa04660 T cell receptor signaling pathway	0.293292	0.308613	0.109701	0.999911	93
hsa04620 Toll-like receptor signaling pathway	0.324683	0.30507	0.112118	0.999911	79
hsa04672 Intestinal immune network for IgA production	0.326534	0.300141	0.118523	0.999911	34
hsa05414 Dilated cardiomyopathy	0.321233	0.266285	0.144732	0.999911	77
hsa05310 Asthma	0.343481	0.266803	0.147599	0.999911	22
hsa04742 Taste transduction	0.350714	0.262687	0.148844	0.999911	34
hsa02010 ABC transporters	0.337199	0.253043	0.157778	0.999911	43
hsa04514 Cell adhesion molecules (CAMs)	0.31878	0.245808	0.163828	0.999911	110
hsa05416 Viral myocarditis	0.300748	0.238964	0.171772	0.999911	59
hsa04320 Dorso-ventral axis formation	0.342567	0.236966	0.175574	0.999911	24
hsa04650 Natural killer cell mediated cytotoxicity	0.329068	0.233172	0.176463	0.999911	101
hsa05140 Leishmaniasis	0.330817	0.215947	0.195259	0.999911	65
hsa04340 Hedgehog signaling pathway	0.357496	0.215712	0.196122	0.999911	43
hsa05330 Allograft rejection	0.30131	0.216327	0.197652	0.999911	29
hsa00601 Glycosphingolipid biosynthesis - lacto and neolacto series	0.365131	0.210636	0.202646	0.999911	24
hsa05020 Prion diseases	0.356329	0.199306	0.215049	0.999911	28
hsa04062 Chemokine signaling pathway	0.367332	0.195128	0.21799	0.999911	146
hsa05320 Autoimmune thyroid disease	0.308383	0.189495	0.227748	0.999911	34
hsa04380 Osteoclast differentiation	0.368303	0.1819	0.233937	0.999911	113
hsa04920 Adipocytokine signaling pathway	0.368635	0.175288	0.242622	0.999911	64
hsa04630 Jak-STAT signaling pathway	0.368832	0.174681	0.243003	0.999911	119
hsa00561 Glycerolipid metabolism	0.349155	0.170404	0.2499	0.999911	44
hsa05410 Hypertrophic cardiomyopathy (HCM)	0.360965	0.168965	0.25058	0.999911	70
hsa04621 NOD-like receptor signaling pathway	0.381684	0.167612	0.252177	0.999911	52
hsa04060 Cytokine-cytokine receptor interaction	0.302214	0.163181	0.257328	0.999911	181
hsa04976 Bile secretion	0.385004	0.160012	0.262163	0.999911	64
hsa04612 Antigen processing and presentation	0.290195	0.158362	0.266152	0.999911	60
hsa05412 Arrhythmogenic right ventricular cardiomyopathy (ARVC)	0.3524	0.157138	0.266228	0.999911	65
hsa05142 Chagas disease (American trypanosomiasis)	0.38793	0.152248	0.271803	0.999911	88
hsa00650 Butanoate metabolism	0.362734	0.147732	0.280159	0.999911	29
hsa04962 Vasopressin-regulated water reabsorption	0.366365	0.14481	0.282886	0.999911	39
hsa05220 Chronic myeloid leukemia	0.368376	0.143872	0.283408	0.999911	72
hsa00250 Alanine, aspartate and glutamate metabolism	0.383929	0.125855	0.309098	0.999911	31
hsa05332 Graft-versus-host disease	0.3312	0.123802	0.313584	0.999911	27
hsa04512 ECM-receptor interaction	0.326704	0.118444	0.319216	0.999911	78
hsa00532 Glycosaminoglycan biosynthesis - chondroitin sulfate	0.38511	0.117356	0.322192	0.999911	20
hsa04622 RIG-I-like receptor signaling pathway	0.398722	0.114094	0.324746	0.999911	55
hsa05217 Basal cell carcinoma	0.391153	0.110929	0.330064	0.999911	44
hsa00430 Taurine and hypotaurine metabolism	0.422121	0.108808	0.336859	0.999911	10
hsa00590 Arachidonic acid metabolism	0.384953	0.0932672	0.355186	0.999911	50
hsa00564 Glycerophospholipid metabolism	0.411092	0.0906619	0.358979	0.999911	75
hsa05212 Pancreatic cancer	0.393699	0.0836256	0.369627	0.999911	69
hsa00670 One carbon pool by folate	0.397966	0.0838564	0.370332	0.999911	18
hsa04722 Neurotrophin signaling pathway	0.396509	0.0809738	0.373399	0.999911	119
hsa00310 Lysine degradation	0.370938	0.0800078	0.376201	0.999911	43
hsa04122 Sulfur relay system	0.432908	0.0769124	0.38342	0.999911	10
hsa04360 Axon guidance	0.400285	0.0701118	0.389959	0.999911	121
hsa04370 VEGF signaling pathway	0.415205	0.0636608	0.399862	0.999911	70
hsa00270 Cysteine and methionine metabolism	0.397941	0.062672	0.402078	0.999911	34
hsa04130 SNARE interactions in vesicular transport	0.371279	0.0636855	0.402456	0.999911	34
hsa04330 Notch signaling pathway	0.397901	0.0618222	0.403672	0.999911	43
hsa00533 Glycosaminoglycan biosynthesis - keratan sulfate	0.415743	0.0615493	0.405018	0.999911	14
hsa04666 Fc gamma R-mediated phagocytosis	0.4213	0.0586471	0.407835	0.999911	91
hsa05145 Toxoplasmosis	0.396302	0.055251	0.412791	0.999911	122
hsa03410 Base excision repair	0.398841	0.0537016	0.415278	0.999911	33
hsa04664 Fc epsilon RI signaling pathway	0.401717	0.0532831	0.41559	0.999911	72
hsa05144 Malaria	0.38584	0.0539553	0.416476	0.999911	44
hsa00565 Ether lipid metabolism	0.42538	0.0485208	0.423862	0.999911	32
hsa05223 Non-small cell lung cancer	0.410128	0.0432964	0.431602	0.999911	53
hsa04912 GnRH signaling pathway	0.41461	0.0411116	0.434698	0.999911	87
hsa04972 Pancreatic secretion	0.434757	0.0406331	0.43551	0.999911	91
hsa05160 Hepatitis C	0.401074	0.0340217	0.446207	0.999911	117
hsa05014 Amyotrophic lateral sclerosis (ALS)	0.398742	0.0292979	0.453877	0.999911	49
hsa05200 Pathways in cancer	0.418889	0.0275948	0.456128	0.999911	302
hsa04916 Melanogenesis	0.423688	0.0253245	0.459944	0.999911	84
hsa05213 Endometrial cancer	0.414821	0.0239239	0.461966	0.999911	52
hsa04623 Cytosolic DNA-sensing pathway	0.421491	0.0218781	0.465365	0.999911	37
hsa00120 Primary bile acid biosynthesis	0.426425	0.0151054	0.477404	0.999911	14
hsa00591 Linoleic acid metabolism	0.436186	0.0130624	0.480254	0.999911	25
hsa00592 alpha-Linolenic acid metabolism	0.447276	0.011612	0.481476	0.999911	16
hsa00040 Pentose and glucuronate interconversions	0.433536	0.0102179	0.484143	0.999911	20
hsa05222 Small cell lung cancer	0.430303	0.00677186	0.489333	0.999911	84
hsa05146 Amoebiasis	0.44337	0.00319381	0.494994	0.999911	87
hsa05143 African trypanosomiasis	0.454478	-0.00425103	0.507271	0.999911	29
hsa00340 Histidine metabolism	0.437319	-0.00638043	0.510308	0.999911	28
hsa03015 mRNA surveillance pathway	0.409777	-0.00714269	0.511198	0.999911	77
hsa04020 Calcium signaling pathway	0.440387	-0.0124701	0.519936	0.999911	147
hsa04614 Renin-angiotensin system	0.439204	-0.0126226	0.520831	0.999911	12
hsa00360 Phenylalanine metabolism	0.435213	-0.0177012	0.527342	0.999911	16
hsa00100 Steroid biosynthesis	0.37013	-0.0176615	0.528002	0.999911	17
hsa00760 Nicotinate and nicotinamide metabolism	0.408117	-0.023095	0.536767	0.999911	23
hsa00514 Other types of O-glycan biosynthesis	0.448254	-0.0287564	0.544573	0.999911	32
hsa00910 Nitrogen metabolism	0.445333	-0.0286173	0.545033	0.999911	22
hsa00512 Mucin type O-Glycan biosynthesis	0.435519	-0.0323182	0.550503	0.999911	28
hsa04115 p53 signaling pathway	0.422228	-0.0338121	0.553384	0.999911	67
hsa00380 Tryptophan metabolism	0.422688	-0.043315	0.568067	0.999911	39
hsa04510 Focal adhesion	0.437174	-0.0437068	0.569004	0.999911	190
hsa04350 TGF-beta signaling pathway	0.448172	-0.0456942	0.572139	0.999911	82
hsa04977 Vitamin digestion and absorption	0.46618	-0.0468951	0.573776	0.999911	23
hsa04975 Fat digestion and absorption	0.465481	-0.0478828	0.57548	0.999911	36
hsa04270 Vascular smooth muscle contraction	0.450976	-0.0519607	0.582085	0.999911	97
hsa00603 Glycosphingolipid biosynthesis - globo series	0.459942	-0.05416	0.583789	0.999911	14
hsa00280 Valine, leucine and isoleucine degradation	0.362626	-0.0536668	0.584377	0.999911	44
hsa00053 Ascorbate and aldarate metabolism	0.458552	-0.0617117	0.595929	0.999911	14
hsa00562 Inositol phosphate metabolism	0.453913	-0.063752	0.600068	0.999911	54
hsa00290 Valine, leucine and isoleucine biosynthesis	0.431937	-0.0640308	0.600625	0.999911	10
hsa00260 Glycine, serine and threonine metabolism	0.435593	-0.065594	0.603328	0.999911	30
hsa00350 Tyrosine metabolism	0.459566	-0.0713809	0.61188	0.999911	38
hsa00531 Glycosaminoglycan degradation	0.455742	-0.0732092	0.613696	0.999911	17
hsa04150 mTOR signaling pathway	0.442066	-0.0737567	0.615505	0.999911	52
hsa04070 Phosphatidylinositol signaling system	0.47133	-0.074669	0.617092	0.999911	71
hsa00410 beta-Alanine metabolism	0.396382	-0.07919	0.622303	0.999911	20
hsa05120 Epithelial cell signaling in Helicobacter pylori infection	0.434358	-0.0830481	0.629437	0.999911	62
hsa04720 Long-term potentiation	0.455214	-0.0840565	0.630777	0.999911	59
hsa00534 Glycosaminoglycan biosynthesis - heparan sulfate	0.480838	-0.0848267	0.631372	0.999911	25
hsa03040 Spliceosome	0.319872	-0.0948485	0.645706	0.999911	125
hsa03030 DNA replication	0.456245	-0.0977576	0.647877	0.999911	36
hsa05216 Thyroid cancer	0.473137	-0.0961359	0.648104	0.999911	28
hsa00600 Sphingolipid metabolism	0.467704	-0.0978988	0.650859	0.999911	37
hsa00480 Glutathione metabolism	0.449389	-0.102305	0.657692	0.999911	46
hsa03440 Homologous recombination	0.455176	-0.104092	0.65939	0.999911	28
hsa00982 Drug metabolism - cytochrome P450	0.454696	-0.104801	0.661499	0.999911	51
hsa04710 Circadian rhythm - mammal	0.444498	-0.11128	0.66878	0.999911	22
hsa00604 Glycosphingolipid biosynthesis - ganglio series	0.46091	-0.11163	0.669306	0.999911	15
hsa04145 Phagosome	0.390379	-0.11072	0.670998	0.999911	137
hsa00983 Drug metabolism - other enzymes	0.47439	-0.114577	0.675046	0.999911	34
hsa03060 Protein export	0.363316	-0.124567	0.677583	0.999911	23
hsa00140 Steroid hormone biosynthesis	0.470637	-0.121974	0.685898	0.999911	38
hsa04964 Proximal tubule bicarbonate reclamation	0.480466	-0.123981	0.68881	0.999911	22
hsa04146 Peroxisome	0.453557	-0.131916	0.700224	0.999911	79
hsa04140 Regulation of autophagy	0.461275	-0.134029	0.700979	0.999911	23
hsa04530 Tight junction	0.45398	-0.135078	0.704671	0.999911	121
hsa00770 Pantothenate and CoA biosynthesis	0.497111	-0.140251	0.708943	0.999911	15
hsa05323 Rheumatoid arthritis	0.480124	-0.138568	0.70941	0.999911	73
hsa04540 Gap junction	0.491955	-0.145973	0.719613	0.999911	80
hsa00030 Pentose phosphate pathway	0.475657	-0.15315	0.727146	0.999911	25
hsa04144 Endocytosis	0.44993	-0.156973	0.734557	0.999911	194
hsa04744 Phototransduction	0.4984	-0.160344	0.735155	0.999911	18
hsa04120 Ubiquitin mediated proteolysis	0.432251	-0.162033	0.741022	0.999911	134
hsa05100 Bacterial invasion of epithelial cells	0.455843	-0.162687	0.741356	0.999911	69
hsa03013 RNA transport	0.40416	-0.171496	0.752781	0.999911	143
hsa00830 Retinol metabolism	0.486521	-0.174144	0.755575	0.999911	41
hsa04110 Cell cycle	0.462266	-0.174239	0.756309	0.999911	124
hsa04910 Insulin signaling pathway	0.478145	-0.175756	0.758291	0.999911	126
hsa03430 Mismatch repair	0.466313	-0.179472	0.760237	0.999911	23
hsa04970 Salivary secretion	0.524006	-0.17808	0.761082	0.999911	72
hsa03022 Basal transcription factors	0.473365	-0.179487	0.762081	0.999911	34
hsa00051 Fructose and mannose metabolism	0.497632	-0.182487	0.764561	0.999911	32
hsa04310 Wnt signaling pathway	0.475804	-0.199216	0.786582	0.999911	133
hsa04670 Leukocyte transendothelial migration	0.501636	-0.201345	0.789039	0.999911	108
hsa05219 Bladder cancer	0.501611	-0.205293	0.792326	0.999911	42
hsa04914 Progesterone-mediated oocyte maturation	0.50509	-0.205965	0.794047	0.999911	83
hsa05131 Shigellosis	0.459703	-0.212864	0.800659	0.999911	58
hsa04930 Type II diabetes mellitus	0.471476	-0.216766	0.804627	0.999911	44
hsa00980 Metabolism of xenobiotics by cytochrome P450	0.496546	-0.219606	0.808875	0.999911	52
hsa00510 N-Glycan biosynthesis	0.497281	-0.2257	0.815173	0.999911	49
hsa05215 Prostate cancer	0.501766	-0.229144	0.81951	0.999911	86
hsa00920 Sulfur metabolism	0.515244	-0.240142	0.824827	0.999911	12
hsa03450 Non-homologous end-joining	0.502324	-0.243344	0.827892	0.999911	13
hsa00970 Aminoacyl-tRNA biosynthesis	0.462991	-0.242295	0.830148	0.999911	41
hsa04960 Aldosterone-regulated sodium reabsorption	0.501373	-0.242064	0.831571	0.999911	40
hsa04974 Protein digestion and absorption	0.535967	-0.241405	0.831915	0.999911	72
hsa04260 Cardiac muscle contraction	0.500151	-0.246787	0.83681	0.999911	69
hsa03008 Ribosome biogenesis in eukaryotes	0.388539	-0.254938	0.845078	0.999911	73
hsa04740 Olfactory transduction	0.426599	-0.255532	0.84527	0.999911	104
hsa03420 Nucleotide excision repair	0.49514	-0.261744	0.850468	0.999911	43
hsa04966 Collecting duct acid secretion	0.499469	-0.264664	0.850871	0.999911	23
hsa03320 PPAR signaling pathway	0.533472	-0.265086	0.854222	0.999911	61
hsa05218 Melanoma	0.541676	-0.267982	0.857037	0.999911	64
hsa00640 Propanoate metabolism	0.438469	-0.274963	0.859725	0.999911	30
hsa04520 Adherens junction	0.509684	-0.27483	0.862939	0.999911	72
hsa04810 Regulation of actin cytoskeleton	0.497755	-0.291428	0.877723	0.999911	194
hsa00450 Selenocompound metabolism	0.546909	-0.308788	0.887062	0.999911	17
hsa00071 Fatty acid metabolism	0.515174	-0.31017	0.890464	0.999911	40
hsa00520 Amino sugar and nucleotide sugar metabolism	0.525823	-0.31099	0.891084	0.999911	45
hsa00740 Riboflavin metabolism	0.53681	-0.324118	0.893871	0.999911	10
hsa00240 Pyrimidine metabolism	0.521326	-0.319753	0.898564	0.999911	95
hsa00052 Galactose metabolism	0.556177	-0.337255	0.908239	0.999911	23
hsa04973 Carbohydrate digestion and absorption	0.555436	-0.336976	0.909307	0.999911	37
hsa03050 Proteasome	0.29252	-0.363112	0.921885	0.999911	41
hsa00620 Pyruvate metabolism	0.484257	-0.367037	0.926288	0.999911	37
hsa04730 Long-term depression	0.546268	-0.368875	0.928847	0.999911	64
hsa00900 Terpenoid backbone biosynthesis	0.508603	-0.395714	0.936411	0.999911	15
hsa00630 Glyoxylate and dicarboxylate metabolism	0.541203	-0.396798	0.939314	0.999911	18
hsa04940 Type I diabetes mellitus	0.57073	-0.396018	0.941485	0.999911	34
hsa03018 RNA degradation	0.481853	-0.396838	0.942009	0.999911	68
hsa03010 Ribosome	0.140424	-0.41036	0.945341	0.999911	88
hsa00330 Arginine and proline metabolism	0.562571	-0.4082	0.947392	0.999911	52
hsa00511 Other glycan degradation	0.567784	-0.416805	0.947605	0.999911	15
hsa04142 Lysosome	0.486719	-0.408956	0.948284	0.999911	117
hsa04141 Protein processing in endoplasmic reticulum	0.402454	-0.422594	0.953454	0.999911	161
hsa05110 Vibrio cholerae infection	0.528363	-0.432123	0.956366	0.999911	50
hsa00020 Citrate cycle (TCA cycle)	0.518847	-0.442943	0.958579	0.999911	29
hsa03020 RNA polymerase	0.55896	-0.460579	0.964992	0.999911	29
hsa00563 Glycosylphosphatidylinositol(GPI)-anchor biosynthesis	0.572134	-0.460812	0.965103	0.999911	24
hsa00860 Porphyrin and chlorophyll metabolism	0.562326	-0.466316	0.966871	0.999911	29
hsa05214 Glioma	0.595263	-0.475813	0.970791	0.999911	61
hsa04950 Maturity onset diabetes of the young	0.547231	-0.5085	0.976149	0.999911	22
hsa01040 Biosynthesis of unsaturated fatty acids	0.606226	-0.521883	0.979854	0.999911	21
hsa00500 Starch and sucrose metabolism	0.645184	-0.526362	0.981648	0.999911	38
hsa00010 Glycolysis / Gluconeogenesis	0.592746	-0.572148	0.988367	0.999911	57
hsa05130 Pathogenic Escherichia coli infection	0.533434	-0.586993	0.989678	0.999911	52
hsa04114 Oocyte meiosis	0.612697	-0.593951	0.990998	0.999911	104
hsa00230 Purine metabolism	0.622258	-0.668577	0.996154	0.999911	153
hsa05010 Alzheimer's disease	0.521367	-0.746141	0.998482	0.999911	156
hsa05016 Huntington's disease	0.486046	-0.781317	0.99904	0.999911	175
hsa05012 Parkinson's disease	0.527935	-0.90172	0.999822	0.999911	126
hsa00190 Oxidative phosphorylation	0.523814	-0.946806	0.999911	0.999911	126
hsa00232 Caffeine metabolism	NA	NA	NA	NA	3
hsa01100 Metabolic pathways	NA	NA	NA	NA	1050
hsa00300 Lysine biosynthesis	NA	NA	NA	NA	3
hsa00130 Ubiquinone and other terpenoid-quinone biosynthesis	NA	NA	NA	NA	7
hsa00062 Fatty acid elongation in mitochondria	NA	NA	NA	NA	8
hsa00785 Lipoic acid metabolism	NA	NA	NA	NA	3
hsa00460 Cyanoamino acid metabolism	NA	NA	NA	NA	6
hsa00472 D-Arginine and D-ornithine metabolism	NA	NA	NA	NA	1
hsa00790 Folate biosynthesis	NA	NA	NA	NA	8
hsa00061 Fatty acid biosynthesis	NA	NA	NA	NA	5
hsa00400 Phenylalanine, tyrosine and tryptophan biosynthesis	NA	NA	NA	NA	5
hsa00524 Butirosin and neomycin biosynthesis	NA	NA	NA	NA	3
hsa00730 Thiamine metabolism	NA	NA	NA	NA	4
hsa00471 D-Glutamine and D-glutamate metabolism	NA	NA	NA	NA	4
hsa00750 Vitamin B6 metabolism	NA	NA	NA	NA	6
hsa00780 Biotin metabolism	NA	NA	NA	NA	2
hsa00072 Synthesis and degradation of ketone bodies	NA	NA	NA	NA	9

## Sheet: Gamma.downregulated.pathways
KEGG Pathway	p.geomean	stat.mean	p.val	q.val	set.size
hsa03050 Proteasome	0.0817612	-1.09694	9.91e-05	0.0210191	41
hsa03060 Protein export	0.164846	-0.692801	0.00975422	0.597422	23
hsa00010 Glycolysis / Gluconeogenesis	0.202136	-0.657808	0.011875	0.597422	57
hsa05012 Parkinson's disease	0.143241	-0.646569	0.0129652	0.597422	126
hsa00190 Oxidative phosphorylation	0.133801	-0.61487	0.0170906	0.597422	126
hsa04110 Cell cycle	0.20774	-0.60974	0.0176576	0.597422	124
hsa03008 Ribosome biogenesis in eukaryotes	0.214699	-0.585163	0.0220184	0.597422	73
hsa04141 Protein processing in endoplasmic reticulum	0.165238	-0.571262	0.0244491	0.597422	161
hsa00290 Valine, leucine and isoleucine biosynthesis	0.241941	-0.580675	0.0269091	0.597422	10
hsa04950 Maturity onset diabetes of the young	0.211728	-0.549614	0.0319857	0.597422	22
hsa05016 Huntington's disease	0.16693	-0.529194	0.0337888	0.597422	175
hsa03430 Mismatch repair	0.250702	-0.536583	0.0338164	0.597422	23
hsa00970 Aminoacyl-tRNA biosynthesis	0.218468	-0.500812	0.0433864	0.661216	41
hsa04940 Type I diabetes mellitus	0.272088	-0.498289	0.0436652	0.661216	34
hsa00620 Pyruvate metabolism	0.22593	-0.485765	0.0479972	0.678361	37
hsa00100 Steroid biosynthesis	0.229548	-0.415382	0.0837179	0.949063	17
hsa00280 Valine, leucine and isoleucine degradation	0.247998	-0.399524	0.0856278	0.949063	44
hsa00510 N-Glycan biosynthesis	0.271661	-0.387385	0.091745	0.949063	49
hsa03040 Spliceosome	0.253044	-0.381484	0.0939808	0.949063	125
hsa00020 Citrate cycle (TCA cycle)	0.250763	-0.386444	0.0956922	0.949063	29
hsa04114 Oocyte meiosis	0.264841	-0.375977	0.0972264	0.949063	104
hsa05010 Alzheimer's disease	0.211567	-0.372476	0.0990957	0.949063	156
hsa00640 Propanoate metabolism	0.252837	-0.368546	0.105531	0.949063	30
hsa04115 p53 signaling pathway	0.30819	-0.359748	0.107441	0.949063	67
hsa03420 Nucleotide excision repair	0.279019	-0.346902	0.117051	0.985986	43
hsa00590 Arachidonic acid metabolism	0.328685	-0.339777	0.120923	0.985986	50
hsa03022 Basal transcription factors	0.307634	-0.327607	0.130722	0.999337	34
hsa00230 Purine metabolism	0.297542	-0.32055	0.133977	0.999337	153
hsa04146 Peroxisome	0.284932	-0.307776	0.144717	0.999337	79
hsa03015 mRNA surveillance pathway	0.30977	-0.291706	0.157172	0.999337	77
hsa00900 Terpenoid backbone biosynthesis	0.31632	-0.288303	0.166839	0.999337	15
hsa00310 Lysine degradation	0.288787	-0.268568	0.179489	0.999337	43
hsa03030 DNA replication	0.333054	-0.268325	0.180019	0.999337	36
hsa00650 Butanoate metabolism	0.317697	-0.259272	0.187911	0.999337	29
hsa00860 Porphyrin and chlorophyll metabolism	0.326372	-0.258132	0.188438	0.999337	29
hsa03013 RNA transport	0.280112	-0.253844	0.190473	0.999337	143
hsa00260 Glycine, serine and threonine metabolism	0.347713	-0.252732	0.192893	0.999337	30
hsa01040 Biosynthesis of unsaturated fatty acids	0.324912	-0.239352	0.207959	0.999337	21
hsa00051 Fructose and mannose metabolism	0.358603	-0.234929	0.209998	0.999337	32
hsa00565 Ether lipid metabolism	0.365371	-0.231219	0.213605	0.999337	32
hsa03018 RNA degradation	0.312087	-0.228091	0.216137	0.999337	68
hsa04514 Cell adhesion molecules (CAMs)	0.339931	-0.227173	0.216405	0.999337	110
hsa03440 Homologous recombination	0.357917	-0.215402	0.230141	0.999337	28
hsa04150 mTOR signaling pathway	0.357549	-0.208449	0.236428	0.999337	52
hsa00670 One carbon pool by folate	0.356951	-0.203841	0.244994	0.999337	18
hsa00920 Sulfur metabolism	0.367149	-0.202367	0.247625	0.999337	12
hsa00740 Riboflavin metabolism	0.362087	-0.200444	0.251815	0.999337	10
hsa00514 Other types of O-glycan biosynthesis	0.359408	-0.19385	0.252688	0.999337	32
hsa00071 Fatty acid metabolism	0.30067	-0.192935	0.253106	0.999337	40
hsa00630 Glyoxylate and dicarboxylate metabolism	0.30468	-0.191759	0.254661	0.999337	18
hsa04930 Type II diabetes mellitus	0.357132	-0.190428	0.256287	0.999337	44
hsa04744 Phototransduction	0.39034	-0.189468	0.258473	0.999337	18
hsa05130 Pathogenic Escherichia coli infection	0.269275	-0.184188	0.26279	0.999337	52
hsa04612 Antigen processing and presentation	0.316096	-0.18288	0.264931	0.999337	60
hsa04120 Ubiquitin mediated proteolysis	0.3024	-0.180737	0.266521	0.999337	134
hsa00480 Glutathione metabolism	0.358442	-0.175814	0.272747	0.999337	46
hsa04914 Progesterone-mediated oocyte maturation	0.359374	-0.164843	0.284558	0.999337	83
hsa03410 Base excision repair	0.367421	-0.165541	0.285301	0.999337	33
hsa00030 Pentose phosphate pathway	0.363195	-0.164787	0.287616	0.999337	25
hsa04144 Endocytosis	0.391011	-0.154213	0.296795	0.999337	194
hsa04122 Sulfur relay system	0.391311	-0.154566	0.30159	0.999337	10
hsa00564 Glycerophospholipid metabolism	0.402636	-0.136449	0.318795	0.999337	75
hsa04975 Fat digestion and absorption	0.392119	-0.135748	0.320186	0.999337	36
hsa04742 Taste transduction	0.403661	-0.121693	0.338143	0.999337	34
hsa05320 Autoimmune thyroid disease	0.369176	-0.120543	0.339656	0.999337	34
hsa03450 Non-homologous end-joining	0.394529	-0.118135	0.345437	0.999337	13
hsa05330 Allograft rejection	0.370893	-0.110941	0.351987	0.999337	29
hsa00380 Tryptophan metabolism	0.346688	-0.107225	0.356646	0.999337	39
hsa04070 Phosphatidylinositol signaling system	0.401462	-0.0987901	0.366588	0.999337	71
hsa00563 Glycosylphosphatidylinositol(GPI)-anchor biosynthesis	0.361636	-0.097662	0.371045	0.999337	24
hsa05332 Graft-versus-host disease	0.376952	-0.0900033	0.379054	0.999337	27
hsa00561 Glycerolipid metabolism	0.410917	-0.0891135	0.379638	0.999337	44
hsa00340 Histidine metabolism	0.407891	-0.0817885	0.389444	0.999337	28
hsa00450 Selenocompound metabolism	0.395066	-0.0769947	0.39714	0.999337	17
hsa00052 Galactose metabolism	0.418995	-0.0645547	0.41239	0.999337	23
hsa00534 Glycosaminoglycan biosynthesis - heparan sulfate	0.420807	-0.0643541	0.412975	0.999337	25
hsa00500 Starch and sucrose metabolism	0.408255	-0.0557188	0.424817	0.999337	38
hsa04977 Vitamin digestion and absorption	0.427823	-0.0546224	0.426444	0.999337	23
hsa05310 Asthma	0.442116	-0.051038	0.430737	0.999337	22
hsa00360 Phenylalanine metabolism	0.424399	-0.0510639	0.430879	0.999337	16
hsa03020 RNA polymerase	0.368553	-0.043861	0.439864	0.999337	29
hsa04145 Phagosome	0.362753	-0.0399195	0.445588	0.999337	137
hsa00270 Cysteine and methionine metabolism	0.421287	-0.0375252	0.448877	0.999337	34
hsa00410 beta-Alanine metabolism	0.397236	-0.0360353	0.451318	0.999337	20
hsa04710 Circadian rhythm - mammal	0.395611	-0.0334225	0.454758	0.999337	22
hsa00330 Arginine and proline metabolism	0.409199	-0.0327656	0.45527	0.999337	52
hsa00240 Pyrimidine metabolism	0.3989	-0.0278667	0.461859	0.999337	95
hsa04973 Carbohydrate digestion and absorption	0.430479	-0.0189723	0.474088	0.999337	37
hsa04920 Adipocytokine signaling pathway	0.41966	-0.0153952	0.478789	0.999337	64
hsa05216 Thyroid cancer	0.424751	-0.0106837	0.485474	0.999337	28
hsa04130 SNARE interactions in vesicular transport	0.41329	-0.00953037	0.487046	0.999337	34
hsa00603 Glycosphingolipid biosynthesis - globo series	0.421476	-0.00889927	0.487323	0.999337	14
hsa05340 Primary immunodeficiency	0.445595	-0.00327673	0.495707	0.999337	26
hsa00604 Glycosphingolipid biosynthesis - ganglio series	0.423654	-0.00281545	0.496326	0.999337	15
hsa00770 Pantothenate and CoA biosynthesis	0.445855	-0.00231117	0.497335	0.999337	15
hsa04622 RIG-I-like receptor signaling pathway	0.421005	0.000380674	0.500151	0.999337	55
hsa00760 Nicotinate and nicotinamide metabolism	0.422908	0.00137857	0.502909	0.999337	23
hsa00053 Ascorbate and aldarate metabolism	0.429694	0.00295195	0.504743	0.999337	14
hsa00120 Primary bile acid biosynthesis	0.450526	0.00868673	0.511304	0.999337	14
hsa04672 Intestinal immune network for IgA production	0.459057	0.0125453	0.517023	0.999337	34
hsa04966 Collecting duct acid secretion	0.39215	0.0195476	0.528184	0.999337	23
hsa00532 Glycosaminoglycan biosynthesis - chondroitin sulfate	0.446099	0.0334906	0.545132	0.999337	20
hsa04960 Aldosterone-regulated sodium reabsorption	0.440821	0.0344145	0.546763	0.999337	40
hsa00830 Retinol metabolism	0.452644	0.0437841	0.559574	0.999337	41
hsa00910 Nitrogen metabolism	0.446498	0.0444016	0.560259	0.999337	22
hsa04614 Renin-angiotensin system	0.459273	0.046799	0.561896	0.999337	12
hsa05110 Vibrio cholerae infection	0.37795	0.0477484	0.565894	0.999337	50
hsa00533 Glycosaminoglycan biosynthesis - keratan sulfate	0.476584	0.0701033	0.594501	0.999337	14
hsa04260 Cardiac muscle contraction	0.417587	0.071937	0.597766	0.999337	69
hsa04140 Regulation of autophagy	0.441516	0.073833	0.599088	0.999337	23
hsa00140 Steroid hormone biosynthesis	0.473506	0.0874381	0.617964	0.999337	38
hsa00592 alpha-Linolenic acid metabolism	0.504051	0.114219	0.650903	0.999337	16
hsa00562 Inositol phosphate metabolism	0.449622	0.116423	0.655673	0.999337	54
hsa00040 Pentose and glucuronate interconversions	0.487847	0.117882	0.656132	0.999337	20
hsa04340 Hedgehog signaling pathway	0.490299	0.117017	0.656453	0.999337	43
hsa00430 Taurine and hypotaurine metabolism	0.505543	0.123446	0.661861	0.999337	10
hsa04740 Olfactory transduction	0.431839	0.121869	0.662445	0.999337	104
hsa04330 Notch signaling pathway	0.470822	0.128096	0.670538	0.999337	43
hsa04623 Cytosolic DNA-sensing pathway	0.455993	0.137583	0.681855	0.999337	37
hsa00511 Other glycan degradation	0.451156	0.144439	0.687763	0.999337	15
hsa05222 Small cell lung cancer	0.463386	0.153935	0.702108	0.999337	84
hsa05144 Malaria	0.485754	0.163902	0.71338	0.999337	44
hsa00591 Linoleic acid metabolism	0.526984	0.167261	0.716387	0.999337	25
hsa04962 Vasopressin-regulated water reabsorption	0.466183	0.174519	0.724653	0.999337	39
hsa00601 Glycosphingolipid biosynthesis - lacto and neolacto series	0.514409	0.184428	0.735353	0.999337	24
hsa00600 Sphingolipid metabolism	0.489229	0.186386	0.738151	0.999337	37
hsa05322 Systemic lupus erythematosus	0.477275	0.188145	0.741436	0.999337	77
hsa05160 Hepatitis C	0.494089	0.193567	0.748075	0.999337	117
hsa00350 Tyrosine metabolism	0.533566	0.20603	0.760787	0.999337	38
hsa04670 Leukocyte transendothelial migration	0.501599	0.205175	0.760813	0.999337	108
hsa04360 Axon guidance	0.509986	0.205901	0.761532	0.999337	121
hsa05145 Toxoplasmosis	0.488305	0.209332	0.764722	0.999337	122
hsa00980 Metabolism of xenobiotics by cytochrome P450	0.510322	0.213675	0.76924	0.999337	52
hsa05219 Bladder cancer	0.485476	0.215802	0.770841	0.999337	42
hsa04020 Calcium signaling pathway	0.530236	0.22242	0.779099	0.999337	147
hsa04540 Gap junction	0.489504	0.224397	0.780267	0.999337	80
hsa05014 Amyotrophic lateral sclerosis (ALS)	0.504538	0.231603	0.787182	0.999337	49
hsa05323 Rheumatoid arthritis	0.471799	0.231382	0.787293	0.999337	73
hsa04974 Protein digestion and absorption	0.518227	0.23345	0.789584	0.999337	72
hsa05221 Acute myeloid leukemia	0.494179	0.239291	0.794862	0.999337	55
hsa04910 Insulin signaling pathway	0.498582	0.247645	0.803663	0.999337	126
hsa05214 Glioma	0.528606	0.248911	0.804556	0.999337	61
hsa05143 African trypanosomiasis	0.549966	0.253826	0.807964	0.999337	29
hsa00983 Drug metabolism - other enzymes	0.524282	0.256749	0.810953	0.999337	34
hsa03320 PPAR signaling pathway	0.542906	0.257213	0.812439	0.999337	61
hsa04730 Long-term depression	0.518197	0.26075	0.815461	0.999337	64
hsa00982 Drug metabolism - cytochrome P450	0.524479	0.263578	0.818278	0.999337	51
hsa00520 Amino sugar and nucleotide sugar metabolism	0.532302	0.264196	0.818378	0.999337	45
hsa05217 Basal cell carcinoma	0.515143	0.267478	0.820522	0.999337	44
hsa05213 Endometrial cancer	0.530066	0.268239	0.821933	0.999337	52
hsa05218 Melanoma	0.538445	0.269441	0.823555	0.999337	64
hsa05212 Pancreatic cancer	0.53906	0.270928	0.825096	0.999337	69
hsa05210 Colorectal cancer	0.513262	0.28079	0.833634	0.999337	62
hsa00250 Alanine, aspartate and glutamate metabolism	0.529536	0.290735	0.840153	0.999337	31
hsa02010 ABC transporters	0.549015	0.290493	0.8414	0.999337	43
hsa05410 Hypertrophic cardiomyopathy (HCM)	0.543809	0.293351	0.844266	0.999337	70
hsa05215 Prostate cancer	0.555477	0.296848	0.847282	0.999337	86
hsa00512 Mucin type O-Glycan biosynthesis	0.536091	0.301663	0.848599	0.999337	28
hsa04630 Jak-STAT signaling pathway	0.554728	0.30042	0.850393	0.999337	119
hsa04530 Tight junction	0.533448	0.305617	0.854267	0.999337	121
hsa04964 Proximal tubule bicarbonate reclamation	0.567653	0.311465	0.85662	0.999337	22
hsa04621 NOD-like receptor signaling pathway	0.518428	0.314673	0.859717	0.999337	52
hsa03010 Ribosome	0.107523	0.323616	0.860462	0.999337	88
hsa05223 Non-small cell lung cancer	0.5597	0.316941	0.862523	0.999337	53
hsa00531 Glycosaminoglycan degradation	0.544541	0.330485	0.868592	0.999337	17
hsa04640 Hematopoietic cell lineage	0.539726	0.330012	0.871987	0.999337	68
hsa04610 Complement and coagulation cascades	0.556585	0.330713	0.872739	0.999337	64
hsa04520 Adherens junction	0.496915	0.33311	0.874362	0.999337	72
hsa04210 Apoptosis	0.499034	0.333969	0.874928	0.999337	80
hsa05150 Staphylococcus aureus infection	0.561436	0.335955	0.875635	0.999337	48
hsa05416 Viral myocarditis	0.533919	0.341004	0.879685	0.999337	59
hsa04060 Cytokine-cytokine receptor interaction	0.505553	0.34193	0.881109	0.999337	181
hsa04270 Vascular smooth muscle contraction	0.571009	0.349107	0.886001	0.999337	97
hsa04310 Wnt signaling pathway	0.513436	0.360515	0.893428	0.999337	133
hsa04080 Neuroactive ligand-receptor interaction	0.450476	0.363013	0.894997	0.999337	189
hsa05414 Dilated cardiomyopathy	0.552618	0.366017	0.896572	0.999337	77
hsa04720 Long-term potentiation	0.579158	0.372067	0.900096	0.999337	59
hsa04972 Pancreatic secretion	0.59149	0.371497	0.900291	0.999337	91
hsa04976 Bile secretion	0.603799	0.391557	0.911613	0.999337	64
hsa04916 Melanogenesis	0.591178	0.39956	0.916145	0.999337	84
hsa04666 Fc gamma R-mediated phagocytosis	0.592449	0.40062	0.916735	0.999337	91
hsa04971 Gastric acid secretion	0.574093	0.406498	0.919411	0.999337	64
hsa05020 Prion diseases	0.584119	0.415779	0.922678	0.999337	28
hsa04370 VEGF signaling pathway	0.586438	0.414623	0.923479	0.999337	70
hsa05412 Arrhythmogenic right ventricular cardiomyopathy (ARVC)	0.566569	0.417356	0.924693	0.999337	65
hsa05142 Chagas disease (American trypanosomiasis)	0.57329	0.423131	0.927744	0.999337	88
hsa05220 Chronic myeloid leukemia	0.56147	0.424354	0.928074	0.999337	72
hsa04512 ECM-receptor interaction	0.566524	0.436925	0.933862	0.999337	78
hsa04664 Fc epsilon RI signaling pathway	0.588227	0.443235	0.936702	0.999337	72
hsa04650 Natural killer cell mediated cytotoxicity	0.596553	0.462346	0.944793	0.999337	101
hsa04320 Dorso-ventral axis formation	0.610212	0.468455	0.945459	0.999337	24
hsa05120 Epithelial cell signaling in Helicobacter pylori infection	0.542291	0.467434	0.945908	0.999337	62
hsa05140 Leishmaniasis	0.586104	0.4702	0.947291	0.999337	65
hsa04620 Toll-like receptor signaling pathway	0.597808	0.49049	0.954485	0.999337	79
hsa04142 Lysosome	0.535549	0.492641	0.955263	0.999337	117
hsa04912 GnRH signaling pathway	0.608472	0.494277	0.955988	0.999337	87
hsa05146 Amoebiasis	0.610213	0.510768	0.960993	0.999337	87
hsa05200 Pathways in cancer	0.630469	0.519461	0.96388	0.999337	302
hsa04350 TGF-beta signaling pathway	0.632279	0.537242	0.968083	0.999337	82
hsa05100 Bacterial invasion of epithelial cells	0.579517	0.547683	0.970274	0.999337	69
hsa04012 ErbB signaling pathway	0.645487	0.547535	0.97062	0.999337	87
hsa04810 Regulation of actin cytoskeleton	0.614018	0.56179	0.973961	0.999337	194
hsa04062 Chemokine signaling pathway	0.632891	0.568313	0.975213	0.999337	146
hsa05211 Renal cell carcinoma	0.647997	0.617744	0.983354	0.999337	70
hsa04970 Salivary secretion	0.679253	0.640218	0.98639	0.999337	72
hsa04510 Focal adhesion	0.650051	0.639059	0.986431	0.999337	190
hsa05131 Shigellosis	0.606484	0.675568	0.989625	0.999337	58
hsa04662 B cell receptor signaling pathway	0.654577	0.725705	0.993731	0.999337	69
hsa04722 Neurotrophin signaling pathway	0.684204	0.73168	0.994227	0.999337	119
hsa04660 T cell receptor signaling pathway	0.643331	0.742921	0.994757	0.999337	93
hsa04380 Osteoclast differentiation	0.740724	0.910777	0.999162	0.999337	113
hsa04010 MAPK signaling pathway	0.737943	0.928328	0.999337	0.999337	240
hsa00232 Caffeine metabolism	NA	NA	NA	NA	3
hsa01100 Metabolic pathways	NA	NA	NA	NA	1050
hsa00300 Lysine biosynthesis	NA	NA	NA	NA	3
hsa00130 Ubiquinone and other terpenoid-quinone biosynthesis	NA	NA	NA	NA	7
hsa00062 Fatty acid elongation in mitochondria	NA	NA	NA	NA	8
hsa00785 Lipoic acid metabolism	NA	NA	NA	NA	3
hsa00460 Cyanoamino acid metabolism	NA	NA	NA	NA	6
hsa00472 D-Arginine and D-ornithine metabolism	NA	NA	NA	NA	1
hsa00790 Folate biosynthesis	NA	NA	NA	NA	8
hsa00061 Fatty acid biosynthesis	NA	NA	NA	NA	5
hsa00400 Phenylalanine, tyrosine and tryptophan biosynthesis	NA	NA	NA	NA	5
hsa00524 Butirosin and neomycin biosynthesis	NA	NA	NA	NA	3
hsa00730 Thiamine metabolism	NA	NA	NA	NA	4
hsa00471 D-Glutamine and D-glutamate metabolism	NA	NA	NA	NA	4
hsa00750 Vitamin B6 metabolism	NA	NA	NA	NA	6
hsa00780 Biotin metabolism	NA	NA	NA	NA	2
hsa00072 Synthesis and degradation of ketone bodies	NA	NA	NA	NA	9

## Sheet: Gamma.upregulated.pathways
KEGG Pathway	p.geomean	stat.mean	p.val	q.val	set.size
hsa04010 MAPK signaling pathway	0.144418	0.928328	0.000663132	0.0887815	240
hsa04380 Osteoclast differentiation	0.148183	0.910777	0.000837561	0.0887815	113
hsa04660 T cell receptor signaling pathway	0.169259	0.742921	0.00524335	0.265797	93
hsa04722 Neurotrophin signaling pathway	0.190323	0.73168	0.00577271	0.265797	119
hsa04662 B cell receptor signaling pathway	0.180779	0.725705	0.0062688	0.265797	69
hsa05131 Shigellosis	0.173781	0.675568	0.0103748	0.360653	58
hsa04510 Focal adhesion	0.215681	0.639059	0.0135688	0.360653	190
hsa04970 Salivary secretion	0.230539	0.640218	0.0136095	0.360653	72
hsa05211 Renal cell carcinoma	0.224016	0.617744	0.0166464	0.392116	70
hsa04062 Chemokine signaling pathway	0.236449	0.568313	0.0247874	0.483316	146
hsa04810 Regulation of actin cytoskeleton	0.233311	0.56179	0.0260387	0.483316	194
hsa04012 ErbB signaling pathway	0.255672	0.547535	0.0293798	0.483316	87
hsa05100 Bacterial invasion of epithelial cells	0.221578	0.547683	0.0297262	0.483316	69
hsa04350 TGF-beta signaling pathway	0.253183	0.537242	0.0319171	0.483316	82
hsa05200 Pathways in cancer	0.260644	0.519461	0.0361202	0.507857	302
hsa05146 Amoebiasis	0.255094	0.510768	0.0390075	0.507857	87
hsa04912 GnRH signaling pathway	0.262934	0.494277	0.044012	0.507857	87
hsa04142 Lysosome	0.218353	0.492641	0.0447374	0.507857	117
hsa04620 Toll-like receptor signaling pathway	0.253667	0.49049	0.0455155	0.507857	79
hsa05140 Leishmaniasis	0.260689	0.4702	0.0527092	0.508861	65
hsa05120 Epithelial cell signaling in Helicobacter pylori infection	0.236629	0.467434	0.0540918	0.508861	62
hsa04320 Dorso-ventral axis formation	0.279807	0.468455	0.054541	0.508861	24
hsa04650 Natural killer cell mediated cytotoxicity	0.27115	0.462346	0.0552066	0.508861	101
hsa04664 Fc epsilon RI signaling pathway	0.274755	0.443235	0.0632983	0.538708	72
hsa04512 ECM-receptor interaction	0.267559	0.436925	0.0661378	0.538708	78
hsa05220 Chronic myeloid leukemia	0.268439	0.424354	0.0719259	0.538708	72
hsa05142 Chagas disease (American trypanosomiasis)	0.275188	0.423131	0.0722561	0.538708	88
hsa05412 Arrhythmogenic right ventricular cardiomyopathy (ARVC)	0.276294	0.417356	0.0753066	0.538708	65
hsa04370 VEGF signaling pathway	0.287835	0.414623	0.0765214	0.538708	70
hsa05020 Prion diseases	0.290424	0.415779	0.0773216	0.538708	28
hsa04971 Gastric acid secretion	0.288519	0.406498	0.0805894	0.538708	64
hsa04666 Fc gamma R-mediated phagocytosis	0.30239	0.40062	0.0832648	0.538708	91
hsa04916 Melanogenesis	0.303034	0.39956	0.0838554	0.538708	84
hsa04976 Bile secretion	0.316013	0.391557	0.0883872	0.55112	64
hsa04972 Pancreatic secretion	0.318638	0.371497	0.0997091	0.574364	91
hsa04720 Long-term potentiation	0.3096	0.372067	0.0999036	0.574364	59
hsa05414 Dilated cardiomyopathy	0.296443	0.366017	0.103428	0.574364	77
hsa04080 Neuroactive ligand-receptor interaction	0.234097	0.363013	0.105003	0.574364	189
hsa04310 Wnt signaling pathway	0.27331	0.360515	0.106572	0.574364	133
hsa04270 Vascular smooth muscle contraction	0.316461	0.349107	0.113999	0.574364	97
hsa04060 Cytokine-cytokine receptor interaction	0.273254	0.34193	0.118891	0.574364	181
hsa05416 Viral myocarditis	0.296202	0.341004	0.120315	0.574364	59
hsa05150 Staphylococcus aureus infection	0.320462	0.335955	0.124365	0.574364	48
hsa04210 Apoptosis	0.275274	0.333969	0.125072	0.574364	80
hsa04520 Adherens junction	0.277959	0.33311	0.125638	0.574364	72
hsa04610 Complement and coagulation cascades	0.318971	0.330713	0.127261	0.574364	64
hsa04640 Hematopoietic cell lineage	0.30625	0.330012	0.128013	0.574364	68
hsa00531 Glycosaminoglycan degradation	0.313024	0.330485	0.131408	0.574364	17
hsa05223 Non-small cell lung cancer	0.328687	0.316941	0.137477	0.574364	53
hsa03010 Ribosome	0.0451623	0.323616	0.139538	0.574364	88
hsa04621 NOD-like receptor signaling pathway	0.295104	0.314673	0.140283	0.574364	52
hsa04964 Proximal tubule bicarbonate reclamation	0.339568	0.311465	0.14338	0.574364	22
hsa04530 Tight junction	0.311668	0.305617	0.145733	0.574364	121
hsa04630 Jak-STAT signaling pathway	0.334375	0.30042	0.149607	0.574364	119
hsa00512 Mucin type O-Glycan biosynthesis	0.320438	0.301663	0.151401	0.574364	28
hsa05215 Prostate cancer	0.337475	0.296848	0.152718	0.574364	86
hsa05410 Hypertrophic cardiomyopathy (HCM)	0.333241	0.293351	0.155734	0.574364	70
hsa02010 ABC transporters	0.339786	0.290493	0.1586	0.574364	43
hsa00250 Alanine, aspartate and glutamate metabolism	0.322974	0.290735	0.159847	0.574364	31
hsa05210 Colorectal cancer	0.322269	0.28079	0.166366	0.578102	62
hsa05212 Pancreatic cancer	0.343445	0.270928	0.174904	0.578102	69
hsa05218 Melanoma	0.34231	0.269441	0.176445	0.578102	64
hsa05213 Endometrial cancer	0.335652	0.268239	0.178067	0.578102	52
hsa05217 Basal cell carcinoma	0.32434	0.267478	0.179478	0.578102	44
hsa00520 Amino sugar and nucleotide sugar metabolism	0.341923	0.264196	0.181622	0.578102	45
hsa00982 Drug metabolism - cytochrome P450	0.340132	0.263578	0.181722	0.578102	51
hsa04730 Long-term depression	0.33178	0.26075	0.184539	0.578102	64
hsa03320 PPAR signaling pathway	0.353277	0.257213	0.187561	0.578102	61
hsa00983 Drug metabolism - other enzymes	0.341071	0.256749	0.189047	0.578102	34
hsa05143 African trypanosomiasis	0.362111	0.253826	0.192036	0.578102	29
hsa05214 Glioma	0.347736	0.248911	0.195444	0.578102	61
hsa04910 Insulin signaling pathway	0.321858	0.247645	0.196337	0.578102	126
hsa05221 Acute myeloid leukemia	0.328008	0.239291	0.205138	0.593649	55
hsa04974 Protein digestion and absorption	0.350143	0.23345	0.210416	0.593649	72
hsa05323 Rheumatoid arthritis	0.315515	0.231382	0.212707	0.593649	73
hsa05014 Amyotrophic lateral sclerosis (ALS)	0.34028	0.231603	0.212818	0.593649	49
hsa04540 Gap junction	0.330228	0.224397	0.219733	0.600397	80
hsa04020 Calcium signaling pathway	0.366493	0.22242	0.220901	0.600397	147
hsa05219 Bladder cancer	0.336895	0.215802	0.229159	0.603727	42
hsa00980 Metabolism of xenobiotics by cytochrome P450	0.358197	0.213675	0.23076	0.603727	52
hsa05145 Toxoplasmosis	0.331863	0.209332	0.235278	0.603727	122
hsa04360 Axon guidance	0.358496	0.205901	0.238468	0.603727	121
hsa04670 Leukocyte transendothelial migration	0.355734	0.205175	0.239187	0.603727	108
hsa00350 Tyrosine metabolism	0.379532	0.20603	0.239213	0.603727	38
hsa05160 Hepatitis C	0.353976	0.193567	0.251925	0.628329	117
hsa05322 Systemic lupus erythematosus	0.343268	0.188145	0.258564	0.637391	77
hsa00600 Sphingolipid metabolism	0.353412	0.186386	0.261849	0.637559	37
hsa00601 Glycosphingolipid biosynthesis - lacto and neolacto series	0.376864	0.184428	0.264647	0.637559	24
hsa04962 Vasopressin-regulated water reabsorption	0.342639	0.174519	0.275347	0.655883	39
hsa00591 Linoleic acid metabolism	0.402428	0.167261	0.283613	0.667731	25
hsa05144 Malaria	0.369271	0.163902	0.28662	0.667731	44
hsa05222 Small cell lung cancer	0.353449	0.153935	0.297892	0.686446	84
hsa00511 Other glycan degradation	0.355623	0.144439	0.312237	0.711765	15
hsa04623 Cytosolic DNA-sensing pathway	0.362112	0.137583	0.318145	0.71752	37
hsa04330 Notch signaling pathway	0.3814	0.128096	0.329462	0.729972	43
hsa04740 Olfactory transduction	0.349324	0.121869	0.337555	0.729972	104
hsa00430 Taurine and hypotaurine metabolism	0.415286	0.123446	0.338139	0.729972	10
hsa04340 Hedgehog signaling pathway	0.404237	0.117017	0.343547	0.729972	43
hsa00040 Pentose and glucuronate interconversions	0.401212	0.117882	0.343868	0.729972	20
hsa00562 Inositol phosphate metabolism	0.36871	0.116423	0.344327	0.729972	54
hsa00592 alpha-Linolenic acid metabolism	0.419134	0.114219	0.349097	0.732758	16
hsa00140 Steroid hormone biosynthesis	0.409818	0.0874381	0.382036	0.794036	38
hsa04140 Regulation of autophagy	0.387521	0.073833	0.400912	0.818722	23
hsa04260 Cardiac muscle contraction	0.368024	0.071937	0.402234	0.818722	69
hsa00533 Glycosaminoglycan biosynthesis - keratan sulfate	0.425796	0.0701033	0.405499	0.818722	14
hsa05110 Vibrio cholerae infection	0.352942	0.0477484	0.434106	0.856608	50
hsa04614 Renin-angiotensin system	0.425184	0.046799	0.438104	0.856608	12
hsa00910 Nitrogen metabolism	0.414869	0.0444016	0.439741	0.856608	22
hsa00830 Retinol metabolism	0.419507	0.0437841	0.440426	0.856608	41
hsa04960 Aldosterone-regulated sodium reabsorption	0.413702	0.0344145	0.453237	0.868757	40
hsa00532 Glycosaminoglycan biosynthesis - chondroitin sulfate	0.421598	0.0334906	0.454868	0.868757	20
hsa04966 Collecting duct acid secretion	0.384229	0.0195476	0.471816	0.886826	23
hsa04672 Intestinal immune network for IgA production	0.450472	0.0125453	0.482977	0.886826	34
hsa00120 Primary bile acid biosynthesis	0.44393	0.00868673	0.488696	0.886826	14
hsa00053 Ascorbate and aldarate metabolism	0.429025	0.00295195	0.495257	0.886826	14
hsa00760 Nicotinate and nicotinamide metabolism	0.425134	0.00137857	0.497091	0.886826	23
hsa04622 RIG-I-like receptor signaling pathway	0.417913	0.000380674	0.499849	0.886826	55
hsa00770 Pantothenate and CoA biosynthesis	0.448332	-0.00231117	0.502665	0.886826	15
hsa00604 Glycosphingolipid biosynthesis - ganglio series	0.425826	-0.00281545	0.503674	0.886826	15
hsa05340 Primary immunodeficiency	0.448844	-0.00327673	0.504293	0.886826	26
hsa00603 Glycosphingolipid biosynthesis - globo series	0.427633	-0.00889927	0.512677	0.886826	14
hsa04130 SNARE interactions in vesicular transport	0.420156	-0.00953037	0.512954	0.886826	34
hsa05216 Thyroid cancer	0.432683	-0.0106837	0.514526	0.886826	28
hsa04920 Adipocytokine signaling pathway	0.430198	-0.0153952	0.521211	0.891103	64
hsa04973 Carbohydrate digestion and absorption	0.444897	-0.0189723	0.525912	0.891947	37
hsa00240 Pyrimidine metabolism	0.421242	-0.0278667	0.538141	0.896608	95
hsa00330 Arginine and proline metabolism	0.433548	-0.0327656	0.54473	0.896608	52
hsa04710 Circadian rhythm - mammal	0.419158	-0.0334225	0.545242	0.896608	22
hsa00410 beta-Alanine metabolism	0.421651	-0.0360353	0.548682	0.896608	20
hsa00270 Cysteine and methionine metabolism	0.449119	-0.0375252	0.551123	0.896608	34
hsa04145 Phagosome	0.397482	-0.0399195	0.554412	0.896608	137
hsa03020 RNA polymerase	0.395882	-0.043861	0.560136	0.896608	29
hsa00360 Phenylalanine metabolism	0.461646	-0.0510639	0.569121	0.896608	16
hsa05310 Asthma	0.481014	-0.051038	0.569263	0.896608	22
hsa04977 Vitamin digestion and absorption	0.468536	-0.0546224	0.573556	0.896608	23
hsa00500 Starch and sucrose metabolism	0.452616	-0.0557188	0.575183	0.896608	38
hsa00534 Glycosaminoglycan biosynthesis - heparan sulfate	0.468723	-0.0643541	0.587025	0.902705	25
hsa00052 Galactose metabolism	0.465434	-0.0645547	0.58761	0.902705	23
hsa00450 Selenocompound metabolism	0.449457	-0.0769947	0.60286	0.91947	17
hsa00340 Histidine metabolism	0.466914	-0.0817885	0.610556	0.924556	28
hsa00561 Glycerolipid metabolism	0.477801	-0.0891135	0.620362	0.927045	44
hsa05332 Graft-versus-host disease	0.439016	-0.0900033	0.620946	0.927045	27
hsa00563 Glycosylphosphatidylinositol(GPI)-anchor biosynthesis	0.432155	-0.097662	0.628955	0.932437	24
hsa04070 Phosphatidylinositol signaling system	0.47356	-0.0987901	0.633412	0.932523	71
hsa00380 Tryptophan metabolism	0.417455	-0.107225	0.643354	0.940628	39
hsa05330 Allograft rejection	0.447325	-0.110941	0.648013	0.94095	29
hsa03450 Non-homologous end-joining	0.479738	-0.118135	0.654563	0.941703	13
hsa05320 Autoimmune thyroid disease	0.452615	-0.120543	0.660344	0.941703	34
hsa04742 Taste transduction	0.494336	-0.121693	0.661857	0.941703	34
hsa04975 Fat digestion and absorption	0.489408	-0.135748	0.679814	0.952745	36
hsa00564 Glycerophospholipid metabolism	0.505117	-0.136449	0.681205	0.952745	75
hsa04122 Sulfur relay system	0.502463	-0.154566	0.69841	0.952745	10
hsa04144 Endocytosis	0.5033	-0.154213	0.703205	0.952745	194
hsa00030 Pentose phosphate pathway	0.483152	-0.164787	0.712384	0.952745	25
hsa03410 Base excision repair	0.486512	-0.165541	0.714699	0.952745	33
hsa04914 Progesterone-mediated oocyte maturation	0.472019	-0.164843	0.715442	0.952745	83
hsa00480 Glutathione metabolism	0.482584	-0.175814	0.727253	0.952745	46
hsa04120 Ubiquitin mediated proteolysis	0.420824	-0.180737	0.733479	0.952745	134
hsa04612 Antigen processing and presentation	0.438192	-0.18288	0.735069	0.952745	60
hsa05130 Pathogenic Escherichia coli infection	0.364364	-0.184188	0.73721	0.952745	52
hsa04744 Phototransduction	0.531153	-0.189468	0.741527	0.952745	18
hsa04930 Type II diabetes mellitus	0.491089	-0.190428	0.743713	0.952745	44
hsa00630 Glyoxylate and dicarboxylate metabolism	0.412439	-0.191759	0.745339	0.952745	18
hsa00071 Fatty acid metabolism	0.411729	-0.192935	0.746894	0.952745	40
hsa00514 Other types of O-glycan biosynthesis	0.494843	-0.19385	0.747312	0.952745	32
hsa00740 Riboflavin metabolism	0.503031	-0.200444	0.748185	0.952745	10
hsa00920 Sulfur metabolism	0.511942	-0.202367	0.752375	0.952745	12
hsa00670 One carbon pool by folate	0.503679	-0.203841	0.755006	0.952745	18
hsa04150 mTOR signaling pathway	0.506528	-0.208449	0.763572	0.957853	52
hsa03440 Homologous recombination	0.512398	-0.215402	0.769859	0.959501	28
hsa04514 Cell adhesion molecules (CAMs)	0.50196	-0.227173	0.783595	0.959501	110
hsa03018 RNA degradation	0.462247	-0.228091	0.783863	0.959501	68
hsa00565 Ether lipid metabolism	0.536273	-0.231219	0.786395	0.959501	32
hsa00051 Fructose and mannose metabolism	0.529808	-0.234929	0.790002	0.959501	32
hsa01040 Biosynthesis of unsaturated fatty acids	0.488153	-0.239352	0.792041	0.959501	21
hsa00260 Glycine, serine and threonine metabolism	0.528843	-0.252732	0.807107	0.961041	30
hsa03013 RNA transport	0.441908	-0.253844	0.809527	0.961041	143
hsa00860 Porphyrin and chlorophyll metabolism	0.504837	-0.258132	0.811562	0.961041	29
hsa00650 Butanoate metabolism	0.494691	-0.259272	0.812089	0.961041	29
hsa03030 DNA replication	0.533556	-0.268325	0.819981	0.961041	36
hsa00310 Lysine degradation	0.469849	-0.268568	0.820511	0.961041	43
hsa00900 Terpenoid backbone biosynthesis	0.51726	-0.288303	0.833161	0.970495	15
hsa03015 mRNA surveillance pathway	0.507621	-0.291706	0.842828	0.976391	77
hsa04146 Peroxisome	0.494072	-0.307776	0.855283	0.985435	79
hsa00230 Purine metabolism	0.516892	-0.32055	0.866023	0.98605	153
hsa03022 Basal transcription factors	0.536891	-0.327607	0.869278	0.98605	34
hsa00590 Arachidonic acid metabolism	0.577299	-0.339777	0.879077	0.98605	50
hsa03420 Nucleotide excision repair	0.509943	-0.346902	0.882949	0.98605	43
hsa04115 p53 signaling pathway	0.566853	-0.359748	0.892559	0.98605	67
hsa00640 Propanoate metabolism	0.489922	-0.368546	0.894469	0.98605	30
hsa05010 Alzheimer's disease	0.407198	-0.372476	0.900904	0.98605	156
hsa04114 Oocyte meiosis	0.507493	-0.375977	0.902774	0.98605	104
hsa00020 Citrate cycle (TCA cycle)	0.5083	-0.386444	0.904308	0.98605	29
hsa03040 Spliceosome	0.496333	-0.381484	0.906019	0.98605	125
hsa00510 N-Glycan biosynthesis	0.533921	-0.387385	0.908255	0.98605	49
hsa00280 Valine, leucine and isoleucine degradation	0.499725	-0.399524	0.914372	0.98605	44
hsa00100 Steroid biosynthesis	0.483539	-0.415382	0.916282	0.98605	17
hsa00620 Pyruvate metabolism	0.521766	-0.485765	0.952003	0.994939	37
hsa04940 Type I diabetes mellitus	0.628236	-0.498289	0.956335	0.994939	34
hsa00970 Aminoacyl-tRNA biosynthesis	0.527898	-0.500812	0.956614	0.994939	41
hsa03430 Mismatch repair	0.622904	-0.536583	0.966184	0.994939	23
hsa05016 Huntington's disease	0.432629	-0.529194	0.966211	0.994939	175
hsa04950 Maturity onset diabetes of the young	0.549768	-0.549614	0.968014	0.994939	22
hsa00290 Valine, leucine and isoleucine biosynthesis	0.630195	-0.580675	0.973091	0.994939	10
hsa04141 Protein processing in endoplasmic reticulum	0.490108	-0.571262	0.975551	0.994939	161
hsa03008 Ribosome biogenesis in eukaryotes	0.603729	-0.585163	0.977982	0.994939	73
hsa04110 Cell cycle	0.607924	-0.60974	0.982342	0.994939	124
hsa00190 Oxidative phosphorylation	0.430176	-0.61487	0.982909	0.994939	126
hsa05012 Parkinson's disease	0.485563	-0.646569	0.987035	0.994939	126
hsa00010 Glycolysis / Gluconeogenesis	0.637846	-0.657808	0.988125	0.994939	57
hsa03060 Protein export	0.565323	-0.692801	0.990246	0.994939	23
hsa03050 Proteasome	0.649201	-1.09694	0.999901	0.999901	41
hsa00232 Caffeine metabolism	NA	NA	NA	NA	3
hsa01100 Metabolic pathways	NA	NA	NA	NA	1050
hsa00300 Lysine biosynthesis	NA	NA	NA	NA	3
hsa00130 Ubiquinone and other terpenoid-quinone biosynthesis	NA	NA	NA	NA	7
hsa00062 Fatty acid elongation in mitochondria	NA	NA	NA	NA	8
hsa00785 Lipoic acid metabolism	NA	NA	NA	NA	3
hsa00460 Cyanoamino acid metabolism	NA	NA	NA	NA	6
hsa00472 D-Arginine and D-ornithine metabolism	NA	NA	NA	NA	1
hsa00790 Folate biosynthesis	NA	NA	NA	NA	8
hsa00061 Fatty acid biosynthesis	NA	NA	NA	NA	5
hsa00400 Phenylalanine, tyrosine and tryptophan biosynthesis	NA	NA	NA	NA	5
hsa00524 Butirosin and neomycin biosynthesis	NA	NA	NA	NA	3
hsa00730 Thiamine metabolism	NA	NA	NA	NA	4
hsa00471 D-Glutamine and D-glutamate metabolism	NA	NA	NA	NA	4
hsa00750 Vitamin B6 metabolism	NA	NA	NA	NA	6
hsa00780 Biotin metabolism	NA	NA	NA	NA	2
hsa00072 Synthesis and degradation of ketone bodies	NA	NA	NA	NA	9
