# Supplementary material for: Single-cell transcriptomes identify human islet cell signatures and reveal cell-type–specific expression changes in type 2 diabetes
Source: Genome Res. 2017 Feb;27(2):208–22. doi: 10.1101/gr.212720.116 (PMC5287227; doi:10.1101/gr.212720.116)
Supplement: Supplemental Material [file supp_gr.212720.116_Supplemental_Table_S9.xlsx]

## Sheet: Swiss_Prot_Cell_Surface_Markers
Supplemental_Table_S9: Signature gene overlap with cell surface markers and receptors.
Table containing a list of the cell type signature genes identified to encode cell surface markers or receptors defined by Swiss Prot. A list of the approximately 3000 human cell surface markers and receptors from Swiss-Prot are provided in a separate sheet. Third, the average log2CPM expression for each gene encoding cell surface markers is provided across all non-diabetic cell types and bulk in…
Entry	Entry name	Status	Protein names	Gene names	Organism	Length
Q14524	SCN5A_HUMAN	reviewed	Sodium channel protein type 5 subunit alpha (HH1) (Sodium channel protein cardiac muscle subunit alpha) (Sodium channel protein type V subunit alpha) (Voltage-gated sodium channel subunit alpha Nav1.5)	SCN5A	Homo sapiens (Human)	2016
P35222	CTNB1_HUMAN	reviewed	Catenin beta-1 (Beta-catenin)	CTNNB1 CTNNB OK/SW-cl.35 PRO2286	Homo sapiens (Human)	781
P00533	EGFR_HUMAN	reviewed	Epidermal growth factor receptor (EC 2.7.10.1) (Proto-oncogene c-ErbB-1) (Receptor tyrosine-protein kinase erbB-1)	EGFR ERBB ERBB1 HER1	Homo sapiens (Human)	1210
P07949	RET_HUMAN	reviewed	Proto-oncogene tyrosine-protein kinase receptor Ret (EC 2.7.10.1) (Cadherin family member 12) (Proto-oncogene c-Ret) [Cleaved into: Soluble RET kinase fragment; Extracellular cell-membrane anchored RET cadherin 120 kDa fragment]	RET CDHF12 CDHR16 PTC RET51	Homo sapiens (Human)	1114
P10721	KIT_HUMAN	reviewed	Mast/stem cell growth factor receptor Kit (SCFR) (EC 2.7.10.1) (Piebald trait protein) (PBT) (Proto-oncogene c-Kit) (Tyrosine-protein kinase Kit) (p145 c-kit) (v-kit Hardy-Zuckerman 4 feline sarcoma viral oncogene homolog) (CD antigen CD117)	KIT SCFR	Homo sapiens (Human)	976
P04626	ERBB2_HUMAN	reviewed	Receptor tyrosine-protein kinase erbB-2 (EC 2.7.10.1) (Metastatic lymph node gene 19 protein) (MLN 19) (Proto-oncogene Neu) (Proto-oncogene c-ErbB-2) (Tyrosine kinase-type cell surface receptor HER2) (p185erbB2) (CD antigen CD340)	ERBB2 HER2 MLN19 NEU NGL	Homo sapiens (Human)	1255
P51787	KCNQ1_HUMAN	reviewed	Potassium voltage-gated channel subfamily KQT member 1 (IKs producing slow voltage-gated potassium channel subunit alpha KvLQT1) (KQT-like 1) (Voltage-gated potassium channel subunit Kv7.1)	KCNQ1 KCNA8 KCNA9 KVLQT1	Homo sapiens (Human)	676
P31749	AKT1_HUMAN	reviewed	RAC-alpha serine/threonine-protein kinase (EC 2.7.11.1) (Protein kinase B) (PKB) (Protein kinase B alpha) (PKB alpha) (Proto-oncogene c-Akt) (RAC-PK-alpha)	AKT1 PKB RAC	Homo sapiens (Human)	480
P35498	SCN1A_HUMAN	reviewed	Sodium channel protein type 1 subunit alpha (Sodium channel protein brain I subunit alpha) (Sodium channel protein type I subunit alpha) (Voltage-gated sodium channel subunit alpha Nav1.1)	SCN1A NAC1 SCN1	Homo sapiens (Human)	2009
P63000	RAC1_HUMAN	reviewed	Ras-related C3 botulinum toxin substrate 1 (Cell migration-inducing gene 5 protein) (Ras-like protein TC25) (p21-Rac1)	RAC1 TC25 MIG5	Homo sapiens (Human)	192
P01375	TNFA_HUMAN	reviewed	Tumor necrosis factor (Cachectin) (TNF-alpha) (Tumor necrosis factor ligand superfamily member 2) (TNF-a) [Cleaved into: Tumor necrosis factor, membrane form (N-terminal fragment) (NTF); Intracellular domain 1 (ICD1); Intracellular domain 2 (ICD2); C-domain 1; C-domain 2; Tumor necrosis factor, soluble form]	TNF TNFA TNFSF2	Homo sapiens (Human)	233
P21802	FGFR2_HUMAN	reviewed	Fibroblast growth factor receptor 2 (FGFR-2) (EC 2.7.10.1) (K-sam) (KGFR) (Keratinocyte growth factor receptor) (CD antigen CD332)	FGFR2 BEK KGFR KSAM	Homo sapiens (Human)	821
Q12809	KCNH2_HUMAN	reviewed	Potassium voltage-gated channel subfamily H member 2 (Eag homolog) (Ether-a-go-go-related gene potassium channel 1) (ERG-1) (Eag-related protein 1) (Ether-a-go-go-related protein 1) (H-ERG) (hERG-1) (hERG1) (Voltage-gated potassium channel subunit Kv11.1)	KCNH2 ERG ERG1 HERG	Homo sapiens (Human)	1159
P11362	FGFR1_HUMAN	reviewed	Fibroblast growth factor receptor 1 (FGFR-1) (EC 2.7.10.1) (Basic fibroblast growth factor receptor 1) (BFGFR) (bFGF-R-1) (Fms-like tyrosine kinase 2) (FLT-2) (N-sam) (Proto-oncogene c-Fgr) (CD antigen CD331)	FGFR1 BFGFR CEK FGFBR FLG FLT2 HBGFR	Homo sapiens (Human)	822
P49768	PSN1_HUMAN	reviewed	Presenilin-1 (PS-1) (EC 3.4.23.-) (Protein S182) [Cleaved into: Presenilin-1 NTF subunit; Presenilin-1 CTF subunit; Presenilin-1 CTF12 (PS1-CTF12)]	PSEN1 AD3 PS1 PSNL1	Homo sapiens (Human)	467
Q06187	BTK_HUMAN	reviewed	Tyrosine-protein kinase BTK (EC 2.7.10.2) (Agammaglobulinemia tyrosine kinase) (ATK) (B-cell progenitor kinase) (BPK) (Bruton tyrosine kinase)	BTK AGMX1 ATK BPK	Homo sapiens (Human)	659
P12931	SRC_HUMAN	reviewed	Proto-oncogene tyrosine-protein kinase Src (EC 2.7.10.2) (Proto-oncogene c-Src) (pp60c-src) (p60-Src)	SRC SRC1	Homo sapiens (Human)	536
Q14289	FAK2_HUMAN	reviewed	Protein-tyrosine kinase 2-beta (EC 2.7.10.2) (Calcium-dependent tyrosine kinase) (CADTK) (Calcium-regulated non-receptor proline-rich tyrosine kinase) (Cell adhesion kinase beta) (CAK-beta) (CAKB) (Focal adhesion kinase 2) (FADK 2) (Proline-rich tyrosine kinase 2) (Related adhesion focal tyrosine kinase) (RAFTK)	PTK2B FAK2 PYK2 RAFTK	Homo sapiens (Human)	1009
Q15465	SHH_HUMAN	reviewed	Sonic hedgehog protein (SHH) (HHG-1) [Cleaved into: Sonic hedgehog protein N-product; Sonic hedgehog protein C-product]	SHH	Homo sapiens (Human)	462
P08631	HCK_HUMAN	reviewed	Tyrosine-protein kinase HCK (EC 2.7.10.2) (Hematopoietic cell kinase) (Hemopoietic cell kinase) (p59-HCK/p60-HCK) (p59Hck) (p61Hck)	HCK	Homo sapiens (Human)	526
P06213	INSR_HUMAN	reviewed	Insulin receptor (IR) (EC 2.7.10.1) (CD antigen CD220) [Cleaved into: Insulin receptor subunit alpha; Insulin receptor subunit beta]	INSR	Homo sapiens (Human)	1382
Q02297	NRG1_HUMAN	reviewed	Pro-neuregulin-1, membrane-bound isoform (Pro-NRG1) [Cleaved into: Neuregulin-1 (Acetylcholine receptor-inducing activity) (ARIA) (Breast cancer cell differentiation factor p45) (Glial growth factor) (Heregulin) (HRG) (Neu differentiation factor) (Sensory and motor neuron-derived factor)]	NRG1 GGF HGL HRGA NDF SMDF	Homo sapiens (Human)	640
P60953	CDC42_HUMAN	reviewed	Cell division control protein 42 homolog (G25K GTP-binding protein)	CDC42	Homo sapiens (Human)	191
P01130	LDLR_HUMAN	reviewed	Low-density lipoprotein receptor (LDL receptor)	LDLR	Homo sapiens (Human)	860
Q99497	PARK7_HUMAN	reviewed	Protein deglycase DJ-1 (DJ-1) (EC 3.1.2.-) (EC 3.5.1.-) (Oncogene DJ1) (Parkinson disease protein 7)	PARK7	Homo sapiens (Human)	189
Q02763	TIE2_HUMAN	reviewed	Angiopoietin-1 receptor (EC 2.7.10.1) (Endothelial tyrosine kinase) (Tunica interna endothelial cell kinase) (Tyrosine kinase with Ig and EGF homology domains-2) (Tyrosine-protein kinase receptor TEK) (Tyrosine-protein kinase receptor TIE-2) (hTIE2) (p140 TEK) (CD antigen CD202b)	TEK TIE2 VMCM VMCM1	Homo sapiens (Human)	1124
P13760	2B14_HUMAN	reviewed	HLA class II histocompatibility antigen, DRB1-4 beta chain (MHC class II antigen DRB1*4) (DR-4) (DR4)	HLA-DRB1	Homo sapiens (Human)	266
Q9TQE0	2B19_HUMAN	reviewed	HLA class II histocompatibility antigen, DRB1-9 beta chain (MHC class II antigen DRB1*9) (DR-9) (DR9)	HLA-DRB1	Homo sapiens (Human)	266
Q30167	2B1A_HUMAN	reviewed	HLA class II histocompatibility antigen, DRB1-10 beta chain (DRw10) (MHC class II antigen DRB1*10)	HLA-DRB1	Homo sapiens (Human)	266
Q29974	2B1G_HUMAN	reviewed	HLA class II histocompatibility antigen, DRB1-16 beta chain (MHC class II antigen DRB1*16) (DR-16) (DR16)	HLA-DRB1	Homo sapiens (Human)	266
P46098	5HT3A_HUMAN	reviewed	5-hydroxytryptamine receptor 3A (5-HT3-A) (5-HT3A) (5-hydroxytryptamine receptor 3) (5-HT-3) (5-HT3R) (Serotonin receptor 3A) (Serotonin-gated ion channel receptor)	HTR3A 5HT3R HTR3	Homo sapiens (Human)	478
A5X5Y0	5HT3E_HUMAN	reviewed	5-hydroxytryptamine receptor 3E (5-HT3-E) (5-HT3E) (Serotonin receptor 3E)	HTR3E	Homo sapiens (Human)	456
Q13639	5HT4R_HUMAN	reviewed	5-hydroxytryptamine receptor 4 (5-HT-4) (5-HT4) (Serotonin receptor 4)	HTR4	Homo sapiens (Human)	388
P01912	2B13_HUMAN	reviewed	HLA class II histocompatibility antigen, DRB1-3 chain (Clone P2-beta-3) (MHC class II antigen DRB1*3)	HLA-DRB1	Homo sapiens (Human)	266
Q30134	2B18_HUMAN	reviewed	HLA class II histocompatibility antigen, DRB1-8 beta chain (MHC class II antigen DRB1*8) (DR-8) (DR8) (DRw8)	HLA-DRB1	Homo sapiens (Human)	266
Q95IE3	2B1C_HUMAN	reviewed	HLA class II histocompatibility antigen, DRB1-12 beta chain (MHC class II antigen DRB1*12) (DR-12) (DR12)	HLA-DRB1	Homo sapiens (Human)	266
P08908	5HT1A_HUMAN	reviewed	5-hydroxytryptamine receptor 1A (5-HT-1A) (5-HT1A) (G-21) (Serotonin receptor 1A)	HTR1A ADRB2RL1 ADRBRL1	Homo sapiens (Human)	422
P28221	5HT1D_HUMAN	reviewed	5-hydroxytryptamine receptor 1D (5-HT-1D) (5-HT1D) (Serotonin 1D alpha receptor) (5-HT-1D-alpha) (Serotonin receptor 1D)	HTR1D HTR1DA HTRL	Homo sapiens (Human)	377
P28566	5HT1E_HUMAN	reviewed	5-hydroxytryptamine receptor 1E (5-HT-1E) (5-HT1E) (S31) (Serotonin receptor 1E)	HTR1E	Homo sapiens (Human)	365
Q70Z44	5HT3D_HUMAN	reviewed	5-hydroxytryptamine receptor 3D (5-HT3-D) (5-HT3D) (Serotonin receptor 3D)	HTR3D	Homo sapiens (Human)	454
P29274	AA2AR_HUMAN	reviewed	Adenosine receptor A2a	ADORA2A ADORA2	Homo sapiens (Human)	412
Q2M2I8	AAK1_HUMAN	reviewed	AP2-associated protein kinase 1 (EC 2.7.11.1) (Adaptor-associated kinase 1)	AAK1 KIAA1048	Homo sapiens (Human)	961
Q13685	AAMP_HUMAN	reviewed	Angio-associated migratory cell protein	AAMP	Homo sapiens (Human)	434
Q2M3G0	ABCB5_HUMAN	reviewed	ATP-binding cassette sub-family B member 5 (ABCB5 P-gp) (P-glycoprotein ABCB5)	ABCB5	Homo sapiens (Human)	1257
Q09428	ABCC8_HUMAN	reviewed	ATP-binding cassette sub-family C member 8 (Sulfonylurea receptor 1)	ABCC8 HRINS SUR SUR1	Homo sapiens (Human)	1581
Q9UNQ0	ABCG2_HUMAN	reviewed	ATP-binding cassette sub-family G member 2 (Breast cancer resistance protein) (CDw338) (Mitoxantrone resistance-associated protein) (Placenta-specific ATP-binding cassette transporter) (Urate exporter) (CD antigen CD338)	ABCG2 ABCP BCRP BCRP1 MXR	Homo sapiens (Human)	655
Q9BYF1	ACE2_HUMAN	reviewed	Angiotensin-converting enzyme 2 (EC 3.4.17.23) (ACE-related carboxypeptidase) (Angiotensin-converting enzyme homolog) (ACEH) (Metalloprotease MPROT15) [Cleaved into: Processed angiotensin-converting enzyme 2]	ACE2 UNQ868/PRO1885	Homo sapiens (Human)	805
P43681	ACHA4_HUMAN	reviewed	Neuronal acetylcholine receptor subunit alpha-4	CHRNA4 NACRA4	Homo sapiens (Human)	627
Q15825	ACHA6_HUMAN	reviewed	Neuronal acetylcholine receptor subunit alpha-6	CHRNA6	Homo sapiens (Human)	494
P13761	2B17_HUMAN	reviewed	HLA class II histocompatibility antigen, DRB1-7 beta chain (MHC class II antigen DRB1*7) (DR-7) (DR7)	HLA-DRB1	Homo sapiens (Human)	266
Q5Y7A7	2B1D_HUMAN	reviewed	HLA class II histocompatibility antigen, DRB1-13 beta chain (MHC class II antigen DRB1*13) (DR-13) (DR13)	HLA-DRB1	Homo sapiens (Human)	266
P08195	4F2_HUMAN	reviewed	4F2 cell-surface antigen heavy chain (4F2hc) (4F2 heavy chain antigen) (Lymphocyte activation antigen 4F2 large subunit) (Solute carrier family 3 member 2) (CD antigen CD98)	SLC3A2 MDU1	Homo sapiens (Human)	630
P30542	AA1R_HUMAN	reviewed	Adenosine receptor A1	ADORA1	Homo sapiens (Human)	326
P0DMS8	AA3R_HUMAN	reviewed	Adenosine receptor A3	ADORA3	Homo sapiens (Human)	318
P00505	AATM_HUMAN	reviewed	Aspartate aminotransferase, mitochondrial (mAspAT) (EC 2.6.1.1) (EC 2.6.1.7) (Fatty acid-binding protein) (FABP-1) (Glutamate oxaloacetate transaminase 2) (Kynurenine aminotransferase 4) (Kynurenine aminotransferase IV) (Kynurenine--oxoglutarate transaminase 4) (Kynurenine--oxoglutarate transaminase IV) (Plasma membrane-associated fatty acid-binding protein) (FABPpm) (Transaminase A)	GOT2	Homo sapiens (Human)	430
Q7Z5R6	AB1IP_HUMAN	reviewed	Amyloid beta A4 precursor protein-binding family B member 1-interacting protein (APBB1-interacting protein 1) (Proline-rich EVH1 ligand 1) (PREL-1) (Proline-rich protein 73) (Rap1-GTP-interacting adapter molecule) (RIAM) (Retinoic acid-responsive proline-rich protein 1) (RARP-1)	APBB1IP PREL1 RARP1 RIAM	Homo sapiens (Human)	666
Q9NP58	ABCB6_HUMAN	reviewed	ATP-binding cassette sub-family B member 6, mitochondrial (Mitochondrial ABC transporter 3) (Mt-ABC transporter 3) (P-glycoprotein-related protein) (Ubiquitously-expressed mammalian ABC half transporter)	ABCB6 MTABC3 PRP UMAT	Homo sapiens (Human)	842
Q05901	ACHB3_HUMAN	reviewed	Neuronal acetylcholine receptor subunit beta-3	CHRNB3	Homo sapiens (Human)	458
Q07912	ACK1_HUMAN	reviewed	Activated CDC42 kinase 1 (ACK-1) (EC 2.7.10.2) (EC 2.7.11.1) (Tyrosine kinase non-receptor protein 2)	TNK2 ACK1	Homo sapiens (Human)	1038
P08172	ACM2_HUMAN	reviewed	Muscarinic acetylcholine receptor M2	CHRM2	Homo sapiens (Human)	466
P08173	ACM4_HUMAN	reviewed	Muscarinic acetylcholine receptor M4	CHRM4	Homo sapiens (Human)	479
P08912	ACM5_HUMAN	reviewed	Muscarinic acetylcholine receptor M5	CHRM5	Homo sapiens (Human)	532
Q29960	1C16_HUMAN	reviewed	HLA class I histocompatibility antigen, Cw-16 alpha chain (MHC class I antigen Cw*16)	HLA-C HLAC	Homo sapiens (Human)	366
Q9GIY3	2B1E_HUMAN	reviewed	HLA class II histocompatibility antigen, DRB1-14 beta chain (MHC class II antigen DRB1*14) (DR-14) (DR14)	HLA-DRB1	Homo sapiens (Human)	266
P28223	5HT2A_HUMAN	reviewed	5-hydroxytryptamine receptor 2A (5-HT-2) (5-HT-2A) (Serotonin receptor 2A)	HTR2A HTR2	Homo sapiens (Human)	471
P41595	5HT2B_HUMAN	reviewed	5-hydroxytryptamine receptor 2B (5-HT-2B) (5-HT2B) (Serotonin receptor 2B)	HTR2B	Homo sapiens (Human)	481
P08910	ABHD2_HUMAN	reviewed	Monoacylglycerol lipase ABHD2 (EC 3.1.1.23) (2-arachidonoylglycerol hydrolase) (Abhydrolase domain-containing protein 2) (Lung alpha/beta hydrolase 2) (Protein PHPS1-2)	ABHD2 LABH2	Homo sapiens (Human)	425
P04229	2B11_HUMAN	reviewed	HLA class II histocompatibility antigen, DRB1-1 beta chain (MHC class II antigen DRB1*1) (DR-1) (DR1)	HLA-DRB1	Homo sapiens (Human)	266
P20039	2B1B_HUMAN	reviewed	HLA class II histocompatibility antigen, DRB1-11 beta chain (DR-5) (DR5) (DRw11) (MHC class II antigen DRB1*11)	HLA-DRB1	Homo sapiens (Human)	266
P01911	2B1F_HUMAN	reviewed	HLA class II histocompatibility antigen, DRB1-15 beta chain (DW2.2/DR2.2) (MHC class II antigen DRB1*15)	HLA-DRB1 HLA-DRB2	Homo sapiens (Human)	266
P47898	5HT5A_HUMAN	reviewed	5-hydroxytryptamine receptor 5A (5-HT-5) (5-HT-5A) (5-HT5A) (Serotonin receptor 5A)	HTR5A	Homo sapiens (Human)	357
P50406	5HT6R_HUMAN	reviewed	5-hydroxytryptamine receptor 6 (5-HT-6) (5-HT6) (Serotonin receptor 6)	HTR6	Homo sapiens (Human)	440
P34969	5HT7R_HUMAN	reviewed	5-hydroxytryptamine receptor 7 (5-HT-7) (5-HT7) (5-HT-X) (Serotonin receptor 7)	HTR7	Homo sapiens (Human)	479
O94911	ABCA8_HUMAN	reviewed	ATP-binding cassette sub-family A member 8	ABCA8 KIAA0822	Homo sapiens (Human)	1581
Q9UGM1	ACHA9_HUMAN	reviewed	Neuronal acetylcholine receptor subunit alpha-9 (Nicotinic acetylcholine receptor subunit alpha-9) (NACHR alpha-9)	CHRNA9 NACHRA9	Homo sapiens (Human)	479
P02708	ACHA_HUMAN	reviewed	Acetylcholine receptor subunit alpha	CHRNA1 ACHRA CHNRA	Homo sapiens (Human)	482
P11230	ACHB_HUMAN	reviewed	Acetylcholine receptor subunit beta	CHRNB1 ACHRB CHRNB	Homo sapiens (Human)	501
O00590	ACKR2_HUMAN	reviewed	Atypical chemokine receptor 2 (C-C chemokine receptor D6) (Chemokine receptor CCR-10) (Chemokine receptor CCR-9) (Chemokine-binding protein 2) (Chemokine-binding protein D6)	ACKR2 CCBP2 CCR10 CMKBR9 D6	Homo sapiens (Human)	384
P25106	ACKR3_HUMAN	reviewed	Atypical chemokine receptor 3 (C-X-C chemokine receptor type 7) (CXC-R7) (CXCR-7) (Chemokine orphan receptor 1) (G-protein coupled receptor 159) (G-protein coupled receptor RDC1 homolog) (RDC-1)	ACKR3 CMKOR1 CXCR7 GPR159 RDC1	Homo sapiens (Human)	362
O14672	ADA10_HUMAN	reviewed	Disintegrin and metalloproteinase domain-containing protein 10 (ADAM 10) (EC 3.4.24.81) (CDw156) (Kuzbanian protein homolog) (Mammalian disintegrin-metalloprotease) (CD antigen CD156c)	ADAM10 KUZ MADM	Homo sapiens (Human)	748
P25100	ADA1D_HUMAN	reviewed	Alpha-1D adrenergic receptor (Alpha-1A adrenergic receptor) (Alpha-1D adrenoreceptor) (Alpha-1D adrenoceptor) (Alpha-adrenergic receptor 1a)	ADRA1D ADRA1A	Homo sapiens (Human)	572
O75077	ADA23_HUMAN	reviewed	Disintegrin and metalloproteinase domain-containing protein 23 (ADAM 23) (Metalloproteinase-like, disintegrin-like, and cysteine-rich protein 3) (MDC-3)	ADAM23 MDC3	Homo sapiens (Human)	832
P08913	ADA2A_HUMAN	reviewed	Alpha-2A adrenergic receptor (Alpha-2 adrenergic receptor subtype C10) (Alpha-2A adrenoreceptor) (Alpha-2A adrenoceptor) (Alpha-2AAR)	ADRA2A ADRA2R ADRAR	Homo sapiens (Human)	450
Q8IZY2	ABCA7_HUMAN	reviewed	ATP-binding cassette sub-family A member 7 (ABCA-SSN) (Autoantigen SS-N) (Macrophage ABC transporter)	ABCA7	Homo sapiens (Human)	2146
Q8IZP0	ABI1_HUMAN	reviewed	Abl interactor 1 (Abelson interactor 1) (Abi-1) (Abl-binding protein 4) (AblBP4) (Eps8 SH3 domain-binding protein) (Eps8-binding protein) (Nap1-binding protein) (Nap1BP) (Spectrin SH3 domain-binding protein 1) (e3B1)	ABI1 SSH3BP1	Homo sapiens (Human)	508
P22303	ACES_HUMAN	reviewed	Acetylcholinesterase (AChE) (EC 3.1.1.7)	ACHE	Homo sapiens (Human)	614
Q9GZZ6	ACH10_HUMAN	reviewed	Neuronal acetylcholine receptor subunit alpha-10 (Nicotinic acetylcholine receptor subunit alpha-10) (NACHR alpha-10)	CHRNA10 NACHRA10	Homo sapiens (Human)	450
P30532	ACHA5_HUMAN	reviewed	Neuronal acetylcholine receptor subunit alpha-5	CHRNA5 NACHRA5	Homo sapiens (Human)	468
P18825	ADA2C_HUMAN	reviewed	Alpha-2C adrenergic receptor (Alpha-2 adrenergic receptor subtype C4) (Alpha-2C adrenoreceptor) (Alpha-2C adrenoceptor) (Alpha-2CAR)	ADRA2C ADRA2L2 ADRA2RL2	Homo sapiens (Human)	462
Q9NPF8	ADAP2_HUMAN	reviewed	Arf-GAP with dual PH domain-containing protein 2 (Centaurin-alpha-2) (Cnt-a2)	ADAP2 CENTA2	Homo sapiens (Human)	381
P28222	5HT1B_HUMAN	reviewed	5-hydroxytryptamine receptor 1B (5-HT-1B) (5-HT1B) (S12) (Serotonin 1D beta receptor) (5-HT-1D-beta) (Serotonin receptor 1B)	HTR1B HTR1DB	Homo sapiens (Human)	390
P30939	5HT1F_HUMAN	reviewed	5-hydroxytryptamine receptor 1F (5-HT-1F) (5-HT1F) (Serotonin receptor 1F)	HTR1F HTR1EL	Homo sapiens (Human)	366
P28335	5HT2C_HUMAN	reviewed	5-hydroxytryptamine receptor 2C (5-HT-2C) (5-HT2C) (5-HTR2C) (5-hydroxytryptamine receptor 1C) (5-HT-1C) (5-HT1C) (Serotonin receptor 2C)	HTR2C HTR1C	Homo sapiens (Human)	458
O95264	5HT3B_HUMAN	reviewed	5-hydroxytryptamine receptor 3B (5-HT3-B) (5-HT3B) (Serotonin receptor 3B)	HTR3B	Homo sapiens (Human)	441
Q8WXA8	5HT3C_HUMAN	reviewed	5-hydroxytryptamine receptor 3C (5-HT3-C) (5-HT3C) (Serotonin receptor 3C)	HTR3C	Homo sapiens (Human)	447
P29275	AA2BR_HUMAN	reviewed	Adenosine receptor A2b	ADORA2B	Homo sapiens (Human)	332
Q15822	ACHA2_HUMAN	reviewed	Neuronal acetylcholine receptor subunit alpha-2	CHRNA2	Homo sapiens (Human)	529
P20309	ACM3_HUMAN	reviewed	Muscarinic acetylcholine receptor M3	CHRM3	Homo sapiens (Human)	590
P12814	ACTN1_HUMAN	reviewed	Alpha-actinin-1 (Alpha-actinin cytoskeletal isoform) (F-actin cross-linking protein) (Non-muscle alpha-actinin-1)	ACTN1	Homo sapiens (Human)	892
O43184	ADA12_HUMAN	reviewed	Disintegrin and metalloproteinase domain-containing protein 12 (ADAM 12) (EC 3.4.24.-) (Meltrin-alpha)	ADAM12 MLTN UNQ346/PRO545	Homo sapiens (Human)	909
Q8NFM4	ADCY4_HUMAN	reviewed	Adenylate cyclase type 4 (EC 4.6.1.1) (ATP pyrophosphate-lyase 4) (Adenylate cyclase type IV) (Adenylyl cyclase 4)	ADCY4	Homo sapiens (Human)	1077
P21589	5NTD_HUMAN	reviewed	5'-nucleotidase (5'-NT) (EC 3.1.3.5) (Ecto-5'-nucleotidase) (CD antigen CD73)	NT5E NT5 NTE	Homo sapiens (Human)	574
Q15758	AAAT_HUMAN	reviewed	Neutral amino acid transporter B(0) (ATB(0)) (Baboon M7 virus receptor) (RD114/simian type D retrovirus receptor) (Sodium-dependent neutral amino acid transporter type 2) (Solute carrier family 1 member 5)	SLC1A5 ASCT2 M7V1 RDR RDRC	Homo sapiens (Human)	541
P12821	ACE_HUMAN	reviewed	Angiotensin-converting enzyme (ACE) (EC 3.2.1.-) (EC 3.4.15.1) (Dipeptidyl carboxypeptidase I) (Kininase II) (CD antigen CD143) [Cleaved into: Angiotensin-converting enzyme, soluble form]	ACE DCP DCP1	Homo sapiens (Human)	1306
O60266	ADCY3_HUMAN	reviewed	Adenylate cyclase type 3 (EC 4.6.1.1) (ATP pyrophosphate-lyase 3) (Adenylate cyclase type III) (AC-III) (Adenylate cyclase, olfactive type) (Adenylyl cyclase 3) (AC3)	ADCY3 KIAA0511	Homo sapiens (Human)	1144
P35612	ADDB_HUMAN	reviewed	Beta-adducin (Erythrocyte adducin subunit beta)	ADD2 ADDB	Homo sapiens (Human)	726
O60241	AGRB2_HUMAN	reviewed	Adhesion G protein-coupled receptor B2 (Brain-specific angiogenesis inhibitor 2)	ADGRB2 BAI2	Homo sapiens (Human)	1585
O60242	AGRB3_HUMAN	reviewed	Adhesion G protein-coupled receptor B3 (Brain-specific angiogenesis inhibitor 3)	ADGRB3 BAI3 KIAA0550	Homo sapiens (Human)	1522
Q5T601	AGRF1_HUMAN	reviewed	Adhesion G-protein coupled receptor F1 (G-protein coupled receptor 110) (G-protein coupled receptor KPG_012) (G-protein coupled receptor PGR19)	ADGRF1 GPR110 PGR19	Homo sapiens (Human)	910
Q9Y653	AGRG1_HUMAN	reviewed	Adhesion G-protein coupled receptor G1 (G-protein coupled receptor 56) (Protein TM7XN1) [Cleaved into: ADGRG1 N-terminal fragment (ADGRG1 NT) (GPR56 N-terminal fragment) (GPR56 NT) (GPR56(N)) (GPR56 extracellular subunit) (GPR56 subunit alpha); ADGRG1 C-terminal fragment (ADGRG1 CT) (GPR56 C-terminal fragment) (GPR56 CT) (GPR56(C)) (GPR56 seven-transmembrane subunit) (GPR56 7TM) (GPR56 subunit be…	ADGRG1 GPR56 TM7LN4 TM7XN1 UNQ540/PRO1083	Homo sapiens (Human)	693
P32297	ACHA3_HUMAN	reviewed	Neuronal acetylcholine receptor subunit alpha-3	CHRNA3 NACHRA3	Homo sapiens (Human)	505
P36544	ACHA7_HUMAN	reviewed	Neuronal acetylcholine receptor subunit alpha-7	CHRNA7 NACHRA7	Homo sapiens (Human)	502
P17787	ACHB2_HUMAN	reviewed	Neuronal acetylcholine receptor subunit beta-2	CHRNB2	Homo sapiens (Human)	502
Q07001	ACHD_HUMAN	reviewed	Acetylcholine receptor subunit delta	CHRND ACHRD	Homo sapiens (Human)	517
P07510	ACHG_HUMAN	reviewed	Acetylcholine receptor subunit gamma	CHRNG ACHRG	Homo sapiens (Human)	517
Q9NPB9	ACKR4_HUMAN	reviewed	Atypical chemokine receptor 4 (C-C chemokine receptor type 11) (C-C CKR-11) (CC-CKR-11) (CCR-11) (CC chemokine receptor-like 1) (CCRL1) (CCX CKR)	ACKR4 CCBP2 CCR11 CCRL1 VSHK1	Homo sapiens (Human)	350
P11229	ACM1_HUMAN	reviewed	Muscarinic acetylcholine receptor M1	CHRM1	Homo sapiens (Human)	460
Q96HD9	ACY3_HUMAN	reviewed	N-acyl-aromatic-L-amino acid amidohydrolase (carboxylate-forming) (EC 3.5.1.114) (Acylase III) (Aminoacylase-3) (ACY-3) (Aspartoacylase-2) (Hepatitis C virus core-binding protein 1) (HCBP1) (HCV core-binding protein 1)	ACY3 ASPA2	Homo sapiens (Human)	319
Q96D53	ADCK4_HUMAN	reviewed	AarF domain-containing protein kinase 4 (EC 2.7.11.-)	ADCK4	Homo sapiens (Human)	544
Q08828	ADCY1_HUMAN	reviewed	Adenylate cyclase type 1 (EC 4.6.1.1) (ATP pyrophosphate-lyase 1) (Adenylate cyclase type I) (Adenylyl cyclase 1) (Ca(2+)/calmodulin-activated adenylyl cyclase)	ADCY1	Homo sapiens (Human)	1119
O43306	ADCY6_HUMAN	reviewed	Adenylate cyclase type 6 (EC 4.6.1.1) (ATP pyrophosphate-lyase 6) (Adenylate cyclase type VI) (Adenylyl cyclase 6) (Ca(2+)-inhibitable adenylyl cyclase)	ADCY6 KIAA0422	Homo sapiens (Human)	1168
Q96A54	ADR1_HUMAN	reviewed	Adiponectin receptor protein 1 (Progestin and adipoQ receptor family member I)	ADIPOR1 PAQR1 TESBP1A CGI-45	Homo sapiens (Human)	375
Q96IZ2	ADTRP_HUMAN	reviewed	Androgen-dependent TFPI-regulating protein	ADTRP C6orf105	Homo sapiens (Human)	230
Q5I7T1	AG10B_HUMAN	reviewed	Putative Dol-P-Glc:Glc(2)Man(9)GlcNAc(2)-PP-Dol alpha-1,2-glucosyltransferase (EC 2.4.1.256) (Alpha-1,2-glucosyltransferase ALG10-A) (Alpha-2-glucosyltransferase ALG10-B) (Asparagine-linked glycosylation protein 10 homolog B) (Potassium channel regulator 1)	ALG10B KCR1	Homo sapiens (Human)	473
Q9BY15	AGRE3_HUMAN	reviewed	Adhesion G protein-coupled receptor E3 (EGF-like module receptor 3) (EGF-like module-containing mucin-like hormone receptor-like 3)	ADGRE3 EMR3 UNQ683/PRO1562	Homo sapiens (Human)	652
Q8IZP9	AGRG2_HUMAN	reviewed	Adhesion G-protein coupled receptor G2 (G-protein coupled receptor 64) (Human epididymis-specific protein 6) (He6)	ADGRG2 GPR64 HE6 TM7LN2	Homo sapiens (Human)	1017
Q9HBW9	AGRL4_HUMAN	reviewed	Adhesion G protein-coupled receptor L4 (EGF, latrophilin and seven transmembrane domain-containing protein 1) (EGF-TM7-latrophilin-related protein) (ETL protein)	ADGRL4 ELTD1 ETL UNQ202/PRO228	Homo sapiens (Human)	690
P30556	AGTR1_HUMAN	reviewed	Type-1 angiotensin II receptor (AT1AR) (AT1BR) (Angiotensin II type-1 receptor) (AT1)	AGTR1 AGTR1A AGTR1B AT2R1 AT2R1B	Homo sapiens (Human)	359
P31751	AKT2_HUMAN	reviewed	RAC-beta serine/threonine-protein kinase (EC 2.7.11.1) (Protein kinase Akt-2) (Protein kinase B beta) (PKB beta) (RAC-PK-beta)	AKT2	Homo sapiens (Human)	481
P43353	AL3B1_HUMAN	reviewed	Aldehyde dehydrogenase family 3 member B1 (EC 1.2.1.5) (Aldehyde dehydrogenase 7)	ALDH3B1 ALDH7	Homo sapiens (Human)	468
P84996	ALEX_HUMAN	reviewed	Protein ALEX (Alternative gene product encoded by XL-exon)	GNAS GNAS1	Homo sapiens (Human)	626
P30926	ACHB4_HUMAN	reviewed	Neuronal acetylcholine receptor subunit beta-4	CHRNB4	Homo sapiens (Human)	498
Q04844	ACHE_HUMAN	reviewed	Acetylcholine receptor subunit epsilon	CHRNE ACHRE	Homo sapiens (Human)	493
P36896	ACV1B_HUMAN	reviewed	Activin receptor type-1B (EC 2.7.11.30) (Activin receptor type IB) (ACTR-IB) (Activin receptor-like kinase 4) (ALK-4) (Serine/threonine-protein kinase receptor R2) (SKR2)	ACVR1B ACVRLK4 ALK4	Homo sapiens (Human)	505
P35348	ADA1A_HUMAN	reviewed	Alpha-1A adrenergic receptor (Alpha-1A adrenoreceptor) (Alpha-1A adrenoceptor) (Alpha-1C adrenergic receptor) (Alpha-adrenergic receptor 1c)	ADRA1A ADRA1C	Homo sapiens (Human)	466
Q9UKQ2	ADA28_HUMAN	reviewed	Disintegrin and metalloproteinase domain-containing protein 28 (ADAM 28) (EC 3.4.24.-) (Epididymal metalloproteinase-like, disintegrin-like, and cysteine-rich protein II) (eMDC II) (Metalloproteinase-like, disintegrin-like, and cysteine-rich protein L) (MDC-L)	ADAM28 ADAM23 MDCL	Homo sapiens (Human)	775
P18089	ADA2B_HUMAN	reviewed	Alpha-2B adrenergic receptor (Alpha-2 adrenergic receptor subtype C2) (Alpha-2B adrenoreceptor) (Alpha-2B adrenoceptor) (Alpha-2BAR)	ADRA2B ADRA2L1 ADRA2RL1	Homo sapiens (Human)	447
P08588	ADRB1_HUMAN	reviewed	Beta-1 adrenergic receptor (Beta-1 adrenoreceptor) (Beta-1 adrenoceptor)	ADRB1 ADRB1R B1AR	Homo sapiens (Human)	477
P13945	ADRB3_HUMAN	reviewed	Beta-3 adrenergic receptor (Beta-3 adrenoreceptor) (Beta-3 adrenoceptor)	ADRB3 ADRB3R B3AR	Homo sapiens (Human)	408
Q9BQI0	AIF1L_HUMAN	reviewed	Allograft inflammatory factor 1-like (Ionized calcium-binding adapter molecule 2)	AIF1L C9orf58 IBA2 UNQ672/PRO1306	Homo sapiens (Human)	150
Q8N7J2	AMER2_HUMAN	reviewed	APC membrane recruitment protein 2 (Amer2) (Protein FAM123A)	AMER2 FAM123A	Homo sapiens (Human)	671
Q86SJ2	AMGO2_HUMAN	reviewed	Amphoterin-induced protein 2 (AMIGO-2) (Alivin-1) (Differentially expressed in gastric adenocarcinomas) (DEGA)	AMIGO2 ALI1	Homo sapiens (Human)	522
Q01718	ACTHR_HUMAN	reviewed	Adrenocorticotropic hormone receptor (ACTH receptor) (ACTH-R) (Adrenocorticotropin receptor) (Melanocortin receptor 2) (MC2-R)	MC2R ACTHR	Homo sapiens (Human)	297
P37023	ACVL1_HUMAN	reviewed	Serine/threonine-protein kinase receptor R3 (SKR3) (EC 2.7.11.30) (Activin receptor-like kinase 1) (ALK-1) (TGF-B superfamily receptor type I) (TSR-I)	ACVRL1 ACVRLK1 ALK1	Homo sapiens (Human)	503
Q13443	ADAM9_HUMAN	reviewed	Disintegrin and metalloproteinase domain-containing protein 9 (ADAM 9) (EC 3.4.24.-) (Cellular disintegrin-related protein) (Meltrin-gamma) (Metalloprotease/disintegrin/cysteine-rich protein 9) (Myeloma cell metalloproteinase)	ADAM9 KIAA0021 MCMP MDC9 MLTNG	Homo sapiens (Human)	819
Q08462	ADCY2_HUMAN	reviewed	Adenylate cyclase type 2 (EC 4.6.1.1) (ATP pyrophosphate-lyase 2) (Adenylate cyclase type II) (Adenylyl cyclase 2)	ADCY2 KIAA1060	Homo sapiens (Human)	1091
O95622	ADCY5_HUMAN	reviewed	Adenylate cyclase type 5 (EC 4.6.1.1) (ATP pyrophosphate-lyase 5) (Adenylate cyclase type V) (Adenylyl cyclase 5) (AC5)	ADCY5	Homo sapiens (Human)	1261
O60503	ADCY9_HUMAN	reviewed	Adenylate cyclase type 9 (EC 4.6.1.1) (ATP pyrophosphate-lyase 9) (Adenylate cyclase type IX) (ACIX) (Adenylyl cyclase 9) (AC9)	ADCY9 KIAA0520	Homo sapiens (Human)	1353
P50052	AGTR2_HUMAN	reviewed	Type-2 angiotensin II receptor (Angiotensin II type-2 receptor) (AT2)	AGTR2	Homo sapiens (Human)	363
P35368	ADA1B_HUMAN	reviewed	Alpha-1B adrenergic receptor (Alpha-1B adrenoreceptor) (Alpha-1B adrenoceptor)	ADRA1B	Homo sapiens (Human)	520
P00813	ADA_HUMAN	reviewed	Adenosine deaminase (EC 3.5.4.4) (Adenosine aminohydrolase)	ADA ADA1	Homo sapiens (Human)	363
P35611	ADDA_HUMAN	reviewed	Alpha-adducin (Erythrocyte adducin subunit alpha)	ADD1 ADDA	Homo sapiens (Human)	737
Q9UEY8	ADDG_HUMAN	reviewed	Gamma-adducin (Adducin-like protein 70)	ADD3 ADDL	Homo sapiens (Human)	706
Q86V24	ADR2_HUMAN	reviewed	Adiponectin receptor protein 2 (Progestin and adipoQ receptor family member II)	ADIPOR2 PAQR2	Homo sapiens (Human)	386
Q86Y34	AGRG3_HUMAN	reviewed	Adhesion G protein-coupled receptor G3 (G-protein coupled receptor 97) (G-protein coupled receptor PGR26)	ADGRG3 GPR97 PGR26	Homo sapiens (Human)	549
O00468	AGRIN_HUMAN	reviewed	Agrin [Cleaved into: Agrin N-terminal 110 kDa subunit; Agrin C-terminal 110 kDa subunit; Agrin C-terminal 90 kDa fragment (C90); Agrin C-terminal 22 kDa fragment (C22)]	AGRN AGRIN	Homo sapiens (Human)	2067
P55008	AIF1_HUMAN	reviewed	Allograft inflammatory factor 1 (AIF-1) (Ionized calcium-binding adapter molecule 1) (Protein G1)	AIF1 G1 IBA1	Homo sapiens (Human)	147
Q9HCE9	ANO8_HUMAN	reviewed	Anoctamin-8 (Transmembrane protein 16H)	ANO8 KIAA1623 TMEM16H	Homo sapiens (Human)	1232
Q7Z6G8	ANS1B_HUMAN	reviewed	Ankyrin repeat and sterile alpha motif domain-containing protein 1B (Amyloid-beta protein intracellular domain-associated protein 1) (AIDA-1) (E2A-PBX1-associated protein) (EB-1)	ANKS1B	Homo sapiens (Human)	1248
Q9H6X2	ANTR1_HUMAN	reviewed	Anthrax toxin receptor 1 (Tumor endothelial marker 8)	ANTXR1 ATR TEM8	Homo sapiens (Human)	564
P58335	ANTR2_HUMAN	reviewed	Anthrax toxin receptor 2 (Capillary morphogenesis gene 2 protein) (CMG-2)	ANTXR2 CMG2	Homo sapiens (Human)	489
Q96PN6	ADCYA_HUMAN	reviewed	Adenylate cyclase type 10 (EC 4.6.1.1) (AH-related protein) (Adenylate cyclase homolog) (Germ cell soluble adenylyl cyclase) (hsAC) (sAC) (Testicular soluble adenylyl cyclase)	ADCY10 SAC	Homo sapiens (Human)	1610
P07550	ADRB2_HUMAN	reviewed	Beta-2 adrenergic receptor (Beta-2 adrenoreceptor) (Beta-2 adrenoceptor)	ADRB2 ADRB2R B2AR	Homo sapiens (Human)	413
Q96PE1	AGRA2_HUMAN	reviewed	Adhesion G protein-coupled receptor A2 (G-protein coupled receptor 124) (Tumor endothelial marker 5)	ADGRA2 GPR124 KIAA1531 TEM5	Homo sapiens (Human)	1338
Q9UKB5	AJAP1_HUMAN	reviewed	Adherens junction-associated protein 1 (Membrane protein shrew-1)	AJAP1 MOT8 SHREW1	Homo sapiens (Human)	411
Q96IF1	AJUBA_HUMAN	reviewed	LIM domain-containing protein ajuba	AJUBA JUB	Homo sapiens (Human)	538
Q8N944	AMER3_HUMAN	reviewed	APC membrane recruitment protein 3 (Amer3) (Protein FAM123C)	AMER3 FAM123C	Homo sapiens (Human)	861
Q86WK6	AMGO1_HUMAN	reviewed	Amphoterin-induced protein 1 (AMIGO-1) (Alivin-2)	AMIGO1 ALI2 AMIGO KIAA1163	Homo sapiens (Human)	493
Q9BYT9	ANO3_HUMAN	reviewed	Anoctamin-3 (Transmembrane protein 16C)	ANO3 C11orf25 TMEM16C GENX-3947	Homo sapiens (Human)	981
A1A5B4	ANO9_HUMAN	reviewed	Anoctamin-9 (Transmembrane protein 16J) (Tumor protein p53-inducible protein 5) (p53-induced gene 5 protein)	ANO9 PIG5 TMEM16J TP53I5	Homo sapiens (Human)	782
P27216	ANX13_HUMAN	reviewed	Annexin A13 (Annexin XIII) (Annexin-13) (Intestine-specific annexin) (ISA)	ANXA13 ANX13	Homo sapiens (Human)	316
O75106	AOC2_HUMAN	reviewed	Retina-specific copper amine oxidase (RAO) (EC 1.4.3.21) (Amine oxidase [copper-containing]) (Semicarbazide-sensitive amine oxidase) (SSAO)	AOC2	Homo sapiens (Human)	756
P53680	AP2S1_HUMAN	reviewed	AP-2 complex subunit sigma (Adaptor protein complex AP-2 subunit sigma) (Adaptor-related protein complex 2 subunit sigma) (Clathrin assembly protein 2 sigma small chain) (Clathrin coat assembly protein AP17) (Clathrin coat-associated protein AP17) (HA2 17 kDa subunit) (Plasma membrane adaptor AP-2 17 kDa protein) (Sigma2-adaptin)	AP2S1 AP17 CLAPS2	Homo sapiens (Human)	142
O43687	AKA7A_HUMAN	reviewed	A-kinase anchor protein 7 isoforms alpha and beta (AKAP-7 isoforms alpha and beta) (A-kinase anchor protein 18 kDa) (AKAP 18) (Protein kinase A-anchoring protein 7 isoforms alpha/beta) (PRKA7 isoforms alpha/beta)	AKAP7 AKAP15 AKAP18	Homo sapiens (Human)	104
Q9H8T0	AKTIP_HUMAN	reviewed	AKT-interacting protein (Ft1) (Fused toes protein homolog)	AKTIP FTS	Homo sapiens (Human)	292
Q9BXJ7	AMNLS_HUMAN	reviewed	Protein amnionless	AMN UNQ513/PRO1028	Homo sapiens (Human)	453
P15144	AMPN_HUMAN	reviewed	Aminopeptidase N (AP-N) (hAPN) (EC 3.4.11.2) (Alanyl aminopeptidase) (Aminopeptidase M) (AP-M) (Microsomal aminopeptidase) (Myeloid plasma membrane glycoprotein CD13) (gp150) (CD antigen CD13)	ANPEP APN CD13 PEPN	Homo sapiens (Human)	967
Q8IZ07	AN13A_HUMAN	reviewed	Ankyrin repeat domain-containing protein 13A (Protein KE03)	ANKRD13A ANKRD13	Homo sapiens (Human)	590
Q6ZTN6	AN13D_HUMAN	reviewed	Ankyrin repeat domain-containing protein 13D	ANKRD13D	Homo sapiens (Human)	518
Q12955	ANK3_HUMAN	reviewed	Ankyrin-3 (ANK-3) (Ankyrin-G)	ANK3	Homo sapiens (Human)	4377
P20594	ANPRB_HUMAN	reviewed	Atrial natriuretic peptide receptor 2 (EC 4.6.1.2) (Atrial natriuretic peptide receptor type B) (ANP-B) (ANPR-B) (NPR-B) (Guanylate cyclase B) (GC-B)	NPR2 ANPRB	Homo sapiens (Human)	1047
O60641	AP180_HUMAN	reviewed	Clathrin coat assembly protein AP180 (91 kDa synaptosomal-associated protein) (Clathrin coat-associated protein AP180) (Phosphoprotein F1-20)	SNAP91 KIAA0656	Homo sapiens (Human)	907
O95782	AP2A1_HUMAN	reviewed	AP-2 complex subunit alpha-1 (100 kDa coated vesicle protein A) (Adaptor protein complex AP-2 subunit alpha-1) (Adaptor-related protein complex 2 subunit alpha-1) (Alpha-adaptin A) (Alpha1-adaptin) (Clathrin assembly protein complex 2 alpha-A large chain) (Plasma membrane adaptor HA2/AP2 adaptin alpha A subunit)	AP2A1 ADTAA CLAPA1	Homo sapiens (Human)	977
O94973	AP2A2_HUMAN	reviewed	AP-2 complex subunit alpha-2 (100 kDa coated vesicle protein C) (Adaptor protein complex AP-2 subunit alpha-2) (Adaptor-related protein complex 2 subunit alpha-2) (Alpha-adaptin C) (Alpha2-adaptin) (Clathrin assembly protein complex 2 alpha-C large chain) (Huntingtin yeast partner J) (Huntingtin-interacting protein 9) (HIP-9) (Huntingtin-interacting protein J) (Plasma membrane adaptor HA2/AP2 ada…	AP2A2 ADTAB CLAPA2 HIP9 HYPJ KIAA0899	Homo sapiens (Human)	939
Q8J025	APCD1_HUMAN	reviewed	Protein APCDD1 (Adenomatosis polyposis coli down-regulated 1 protein)	APCDD1 DRAPC1 FP7019	Homo sapiens (Human)	514
P35414	APJ_HUMAN	reviewed	Apelin receptor (Angiotensin receptor-like 1) (G-protein coupled receptor APJ) (G-protein coupled receptor HG11)	APLNR AGTRL1 APJ	Homo sapiens (Human)	380
P51693	APLP1_HUMAN	reviewed	Amyloid-like protein 1 (APLP) (APLP-1) [Cleaved into: C30]	APLP1	Homo sapiens (Human)	650
Q6QNK2	AGRD1_HUMAN	reviewed	Adhesion G-protein coupled receptor D1 (G-protein coupled receptor 133) (G-protein coupled receptor PGR25)	ADGRD1 GPR133 PGR25	Homo sapiens (Human)	874
Q14246	AGRE1_HUMAN	reviewed	Adhesion G protein-coupled receptor E1 (EGF-like module receptor 1) (EGF-like module-containing mucin-like hormone receptor-like 1) (EMR1 hormone receptor)	ADGRE1 EMR1 TM7LN3	Homo sapiens (Human)	886
Q9UHX3	AGRE2_HUMAN	reviewed	Adhesion G protein-coupled receptor E2 (EGF-like module receptor 2) (EGF-like module-containing mucin-like hormone receptor-like 2) (CD antigen CD312)	ADGRE2 EMR2	Homo sapiens (Human)	823
Q86SQ3	AGRE4_HUMAN	reviewed	Putative adhesion G protein-coupled receptor E4P (EGF-like module receptor 4) (EGF-like module-containing mucin-like hormone receptor-like 4) (G-protein coupled receptor 127) (G-protein coupled receptor PGR16)	ADGRE4P EMR4 EMR4P GPR127 PGR16	Homo sapiens (Human)	457
Q8IZF2	AGRF5_HUMAN	reviewed	Adhesion G protein-coupled receptor F5 (G-protein coupled receptor 116)	ADGRF5 GPR116 KIAA0758	Homo sapiens (Human)	1346
O94910	AGRL1_HUMAN	reviewed	Adhesion G protein-coupled receptor L1 (Calcium-independent alpha-latrotoxin receptor 1) (CIRL-1) (Latrophilin-1) (Lectomedin-2)	ADGRL1 KIAA0821 LEC2 LPHN1	Homo sapiens (Human)	1474
Q9HAR2	AGRL3_HUMAN	reviewed	Adhesion G protein-coupled receptor L3 (Calcium-independent alpha-latrotoxin receptor 3) (CIRL-3) (Latrophilin-3) (Lectomedin-3)	ADGRL3 KIAA0768 LEC3 LPHN3	Homo sapiens (Human)	1447
Q5JTC6	AMER1_HUMAN	reviewed	APC membrane recruitment protein 1 (Amer1) (Protein FAM123B) (Wilms tumor gene on the X chromosome protein)	AMER1 FAM123B WTX	Homo sapiens (Human)	1135
Q01484	ANK2_HUMAN	reviewed	Ankyrin-2 (ANK-2) (Ankyrin-B) (Brain ankyrin) (Non-erythroid ankyrin)	ANK2	Homo sapiens (Human)	3957
Q9NW15	ANO10_HUMAN	reviewed	Anoctamin-10 (Transmembrane protein 16K)	ANO10 TMEM16K	Homo sapiens (Human)	660
Q5XXA6	ANO1_HUMAN	reviewed	Anoctamin-1 (Discovered on gastrointestinal stromal tumors protein 1) (Oral cancer overexpressed protein 2) (Transmembrane protein 16A) (Tumor-amplified and overexpressed sequence 2)	ANO1 DOG1 ORAOV2 TAOS2 TMEM16A	Homo sapiens (Human)	986
P04083	ANXA1_HUMAN	reviewed	Annexin A1 (Annexin I) (Annexin-1) (Calpactin II) (Calpactin-2) (Chromobindin-9) (Lipocortin I) (Phospholipase A2 inhibitory protein) (p35)	ANXA1 ANX1 LPC1	Homo sapiens (Human)	346
Q16853	AOC3_HUMAN	reviewed	Membrane primary amine oxidase (EC 1.4.3.21) (Copper amine oxidase) (HPAO) (Semicarbazide-sensitive amine oxidase) (SSAO) (Vascular adhesion protein 1) (VAP-1)	AOC3 VAP1	Homo sapiens (Human)	763
Q0VD83	APOBR_HUMAN	reviewed	Apolipoprotein B receptor (Apolipoprotein B-100 receptor) (Apolipoprotein B-48 receptor) (Apolipoprotein B48 receptor) (apoB-48R)	APOBR APOB48R	Homo sapiens (Human)	1088
Q3SXY8	AR13B_HUMAN	reviewed	ADP-ribosylation factor-like protein 13B (ADP-ribosylation factor-like protein 2-like 1) (ARL2-like protein 1)	ARL13B ARL2L1	Homo sapiens (Human)	428
Q9UM73	ALK_HUMAN	reviewed	ALK tyrosine kinase receptor (EC 2.7.10.1) (Anaplastic lymphoma kinase) (CD antigen CD246)	ALK	Homo sapiens (Human)	1620
Q32M45	ANO4_HUMAN	reviewed	Anoctamin-4 (Transmembrane protein 16D)	ANO4 TMEM16D	Homo sapiens (Human)	955
Q4KMQ2	ANO6_HUMAN	reviewed	Anoctamin-6 (Small-conductance calcium-activated nonselective cation channel) (SCAN channel) (Transmembrane protein 16F)	ANO6 TMEM16F	Homo sapiens (Human)	910
Q96NW4	ANR27_HUMAN	reviewed	Ankyrin repeat domain-containing protein 27 (VPS9 domain-containing protein)	ANKRD27 PP12899	Homo sapiens (Human)	1050
O00213	APBB1_HUMAN	reviewed	Amyloid beta A4 precursor protein-binding family B member 1 (Protein Fe65)	APBB1 FE65 RIR	Homo sapiens (Human)	710
P41181	AQP2_HUMAN	reviewed	Aquaporin-2 (AQP-2) (ADH water channel) (Aquaporin-CD) (AQP-CD) (Collecting duct water channel protein) (WCH-CD) (Water channel protein for renal collecting duct)	AQP2	Homo sapiens (Human)	271
Q6UW56	ARAID_HUMAN	reviewed	All-trans retinoic acid-induced differentiation factor (Apoptosis-related protein 3) (APR-3) (p18)	ATRAID APR3 C2orf28 HSPC013 UNQ214/PRO240	Homo sapiens (Human)	229
Q8N1W1	ARG28_HUMAN	reviewed	Rho guanine nucleotide exchange factor 28 (190 kDa guanine nucleotide exchange factor) (p190-RhoGEF) (p190RhoGEF) (Rho guanine nucleotide exchange factor)	ARHGEF28 KIAA1998 RGNEF	Homo sapiens (Human)	1705
Q9NR80	ARHG4_HUMAN	reviewed	Rho guanine nucleotide exchange factor 4 (APC-stimulated guanine nucleotide exchange factor 1) (Asef) (Asef1)	ARHGEF4 KIAA1112	Homo sapiens (Human)	690
Q75V66	ANO5_HUMAN	reviewed	Anoctamin-5 (Gnathodiaphyseal dysplasia 1 protein) (Transmembrane protein 16E)	ANO5 GDD1 TMEM16E	Homo sapiens (Human)	913
P55064	AQP5_HUMAN	reviewed	Aquaporin-5 (AQP-5)	AQP5	Homo sapiens (Human)	265
Q96P48	ARAP1_HUMAN	reviewed	Arf-GAP with Rho-GAP domain, ANK repeat and PH domain-containing protein 1 (Centaurin-delta-2) (Cnt-d2)	ARAP1 CENTD2 KIAA0782	Homo sapiens (Human)	1450
Q8WWN8	ARAP3_HUMAN	reviewed	Arf-GAP with Rho-GAP domain, ANK repeat and PH domain-containing protein 3 (Centaurin-delta-3) (Cnt-d3)	ARAP3 CENTD3	Homo sapiens (Human)	1544
P84077	ARF1_HUMAN	reviewed	ADP-ribosylation factor 1	ARF1	Homo sapiens (Human)	181
Q9NR22	ANM8_HUMAN	reviewed	Protein arginine N-methyltransferase 8 (EC 2.1.1.-) (Heterogeneous nuclear ribonucleoprotein methyltransferase-like protein 4)	PRMT8 HRMT1L3 HRMT1L4	Homo sapiens (Human)	394
Q96LR9	APLD1_HUMAN	reviewed	Apolipoprotein L domain-containing protein 1 (Vascular early response gene protein)	APOLD1 VERGE	Homo sapiens (Human)	279
Q92482	AQP3_HUMAN	reviewed	Aquaporin-3 (AQP-3) (Aquaglyceroporin-3)	AQP3	Homo sapiens (Human)	292
Q7LC44	ARC_HUMAN	reviewed	Activity-regulated cytoskeleton-associated protein (ARC/ARG3.1) (Activity-regulated gene 3.1 protein homolog) (Arg3.1)	ARC KIAA0278	Homo sapiens (Human)	396
P62330	ARF6_HUMAN	reviewed	ADP-ribosylation factor 6	ARF6	Homo sapiens (Human)	175
Q92974	ARHG2_HUMAN	reviewed	Rho guanine nucleotide exchange factor 2 (Guanine nucleotide exchange factor H1) (GEF-H1) (Microtubule-regulated Rho-GEF) (Proliferating cell nucleolar antigen p40)	ARHGEF2 KIAA0651 LFP40	Homo sapiens (Human)	986
Q6ZSZ5	ARHGI_HUMAN	reviewed	Rho guanine nucleotide exchange factor 18 (114 kDa Rho-specific guanine nucleotide exchange factor) (p114-Rho-GEF) (p114RhoGEF) (Septin-associated RhoGEF) (SA-RhoGEF)	ARHGEF18 KIAA0521	Homo sapiens (Human)	1173
P49703	ARL4D_HUMAN	reviewed	ADP-ribosylation factor-like protein 4D (ADP-ribosylation factor-like protein 4L)	ARL4D ARF4L	Homo sapiens (Human)	201
Q86YJ7	AN13B_HUMAN	reviewed	Ankyrin repeat domain-containing protein 13B	ANKRD13B	Homo sapiens (Human)	626
Q9NQ90	ANO2_HUMAN	reviewed	Anoctamin-2 (Transmembrane protein 16B)	ANO2 C12orf3 TMEM16B	Homo sapiens (Human)	1003
Q6IWH7	ANO7_HUMAN	reviewed	Anoctamin-7 (Dresden transmembrane protein of the prostate) (D-TMPP) (IPCA-5) (New gene expressed in prostate) (Prostate cancer-associated protein 5) (Transmembrane protein 16G)	ANO7 NGEP PCANAP5 TMEM16G	Homo sapiens (Human)	933
P63010	AP2B1_HUMAN	reviewed	AP-2 complex subunit beta (AP105B) (Adaptor protein complex AP-2 subunit beta) (Adaptor-related protein complex 2 subunit beta) (Beta-2-adaptin) (Beta-adaptin) (Clathrin assembly protein complex 2 beta large chain) (Plasma membrane adaptor HA2/AP2 adaptin beta subunit)	AP2B1 ADTB2 CLAPB1	Homo sapiens (Human)	937
Q96CW1	AP2M1_HUMAN	reviewed	AP-2 complex subunit mu (AP-2 mu chain) (Adaptin-mu2) (Adaptor protein complex AP-2 subunit mu) (Adaptor-related protein complex 2 subunit mu) (Clathrin assembly protein complex 2 mu medium chain) (Clathrin coat assembly protein AP50) (Clathrin coat-associated protein AP50) (HA2 50 kDa subunit) (Plasma membrane adaptor AP-2 50 kDa protein)	AP2M1 CLAPM1 KIAA0109	Homo sapiens (Human)	435
P25054	APC_HUMAN	reviewed	Adenomatous polyposis coli protein (Protein APC) (Deleted in polyposis 2.5)	APC DP2.5	Homo sapiens (Human)	2843
Q06481	APLP2_HUMAN	reviewed	Amyloid-like protein 2 (APLP-2) (APPH) (Amyloid protein homolog) (CDEI box-binding protein) (CDEBP)	APLP2 APPL2	Homo sapiens (Human)	763
P29972	AQP1_HUMAN	reviewed	Aquaporin-1 (AQP-1) (Aquaporin-CHIP) (Urine water channel) (Water channel protein for red blood cells and kidney proximal tubule)	AQP1 CHIP28	Homo sapiens (Human)	269
Q8N4T4	ARG39_HUMAN	reviewed	Rho guanine nucleotide exchange factor 39	ARHGEF39 C9orf100	Homo sapiens (Human)	335
P40617	ARL4A_HUMAN	reviewed	ADP-ribosylation factor-like protein 4A	ARL4A ARL4	Homo sapiens (Human)	200
Q9UHC3	ASIC3_HUMAN	reviewed	Acid-sensing ion channel 3 (ASIC3) (hASIC3) (Amiloride-sensitive cation channel 3) (Neuronal amiloride-sensitive cation channel 3) (Testis sodium channel 1) (hTNaC1)	ASIC3 ACCN3 SLNAC1 TNAC1	Homo sapiens (Human)	531
Q9H0F7	ARL6_HUMAN	reviewed	ADP-ribosylation factor-like protein 6 (Bardet-Biedl syndrome 3 protein)	ARL6 BBS3	Homo sapiens (Human)	186
O43150	ASAP2_HUMAN	reviewed	Arf-GAP with SH3 domain, ANK repeat and PH domain-containing protein 2 (Development and differentiation-enhancing factor 2) (Paxillin-associated protein with ARF GAP activity 3) (PAG3) (Pyk2 C-terminus-associated protein) (PAP)	ASAP2 DDEF2 KIAA0400	Homo sapiens (Human)	1006
Q92485	ASM3B_HUMAN	reviewed	Acid sphingomyelinase-like phosphodiesterase 3b (ASM-like phosphodiesterase 3b) (EC 3.1.4.-)	SMPDL3B ASML3B	Homo sapiens (Human)	455
P25098	ARBK1_HUMAN	reviewed	Beta-adrenergic receptor kinase 1 (Beta-ARK-1) (EC 2.7.11.15) (G-protein coupled receptor kinase 2)	ADRBK1 BARK BARK1 GRK2	Homo sapiens (Human)	689
Q8NCT1	ARRD4_HUMAN	reviewed	Arrestin domain-containing protein 4	ARRDC4	Homo sapiens (Human)	418
Q9NR71	ASAH2_HUMAN	reviewed	Neutral ceramidase (N-CDase) (NCDase) (EC 3.5.1.23) (Acylsphingosine deacylase 2) (BCDase) (LCDase) (hCD) (N-acylsphingosine amidohydrolase 2) (Non-lysosomal ceramidase) [Cleaved into: Neutral ceramidase soluble form]	ASAH2 HNAC1	Homo sapiens (Human)	780
P78348	ASIC1_HUMAN	reviewed	Acid-sensing ion channel 1 (ASIC1) (Amiloride-sensitive cation channel 2, neuronal) (Brain sodium channel 2) (BNaC2)	ASIC1 ACCN2 BNAC2	Homo sapiens (Human)	528
Q16515	ASIC2_HUMAN	reviewed	Acid-sensing ion channel 2 (ASIC2) (Amiloride-sensitive brain sodium channel) (Amiloride-sensitive cation channel 1, neuronal) (Amiloride-sensitive cation channel neuronal 1) (Brain sodium channel 1) (BNC1) (BNaC1) (Mammalian degenerin homolog)	ASIC2 ACCN ACCN1 BNAC1 MDEG	Homo sapiens (Human)	512
P98196	AT11A_HUMAN	reviewed	Probable phospholipid-transporting ATPase IH (EC 3.6.3.1) (ATPase IS) (ATPase class VI type 11A) (P4-ATPase flippase complex alpha subunit ATP11A)	ATP11A ATPIH ATPIS KIAA1021	Homo sapiens (Human)	1134
Q8NB49	AT11C_HUMAN	reviewed	Phospholipid-transporting ATPase IG (EC 3.6.3.1) (ATPase IQ) (ATPase class VI type 11C) (P4-ATPase flippase complex alpha subunit ATP11C)	ATP11C ATPIG ATPIQ	Homo sapiens (Human)	1132
Q86VW2	ARHGP_HUMAN	reviewed	Rho guanine nucleotide exchange factor 25 (Guanine nucleotide exchange factor GEFT) (Rac/Cdc42/Rho exchange factor GEFT) (RhoA/Rac/Cdc42 guanine nucleotide exchange factor GEFT) (p63RhoGEF)	ARHGEF25 GEFT	Homo sapiens (Human)	580
P56559	ARL4C_HUMAN	reviewed	ADP-ribosylation factor-like protein 4C (ADP-ribosylation factor-like protein 7) (ADP-ribosylation factor-like protein LAK)	ARL4C ARL7	Homo sapiens (Human)	192
Q96B67	ARRD3_HUMAN	reviewed	Arrestin domain-containing protein 3 (TBP-2-like inducible membrane protein) (TLIMP)	ARRDC3 KIAA1376	Homo sapiens (Human)	414
O60312	AT10A_HUMAN	reviewed	Probable phospholipid-transporting ATPase VA (EC 3.6.3.1) (ATPase class V type 10A) (Aminophospholipid translocase VA) (P4-ATPase flippase complex alpha subunit ATP10A)	ATP10A ATP10C ATPVA ATPVC KIAA0566	Homo sapiens (Human)	1499
P05023	AT1A1_HUMAN	reviewed	Sodium/potassium-transporting ATPase subunit alpha-1 (Na(+)/K(+) ATPase alpha-1 subunit) (EC 3.6.3.9) (Sodium pump subunit alpha-1)	ATP1A1	Homo sapiens (Human)	1023
P20020	AT2B1_HUMAN	reviewed	Plasma membrane calcium-transporting ATPase 1 (PMCA1) (EC 3.6.3.8) (Plasma membrane calcium ATPase isoform 1) (Plasma membrane calcium pump isoform 1)	ATP2B1 PMCA1	Homo sapiens (Human)	1258
Q01814	AT2B2_HUMAN	reviewed	Plasma membrane calcium-transporting ATPase 2 (PMCA2) (EC 3.6.3.8) (Plasma membrane calcium ATPase isoform 2) (Plasma membrane calcium pump isoform 2)	ATP2B2 PMCA2	Homo sapiens (Human)	1243
O43520	AT8B1_HUMAN	reviewed	Phospholipid-transporting ATPase IC (EC 3.6.3.1) (ATPase class I type 8B member 1) (Familial intrahepatic cholestasis type 1) (P4-ATPase flippase complex alpha subunit ATP8B1)	ATP8B1 ATPIC FIC1 PFIC	Homo sapiens (Human)	1251
P51164	ATP4B_HUMAN	reviewed	Potassium-transporting ATPase subunit beta (Gastric H(+)/K(+) ATPase subunit beta) (Proton pump beta chain)	ATP4B	Homo sapiens (Human)	291
Q13733	AT1A4_HUMAN	reviewed	Sodium/potassium-transporting ATPase subunit alpha-4 (Na(+)/K(+) ATPase alpha-4 subunit) (EC 3.6.3.9) (Sodium pump subunit alpha-4)	ATP1A4 ATP1AL2	Homo sapiens (Human)	1029
P32121	ARRB2_HUMAN	reviewed	Beta-arrestin-2 (Arrestin beta-2)	ARRB2 ARB2 ARR2	Homo sapiens (Human)	409
Q9Y2Q0	AT8A1_HUMAN	reviewed	Phospholipid-transporting ATPase IA (EC 3.6.3.1) (ATPase class I type 8A member 1) (Chromaffin granule ATPase II) (P4-ATPase flippase complex alpha subunit ATP8A1)	ATP8A1 ATPIA	Homo sapiens (Human)	1164
P49407	ARRB1_HUMAN	reviewed	Beta-arrestin-1 (Arrestin beta-1)	ARRB1 ARR1	Homo sapiens (Human)	418
P50993	AT1A2_HUMAN	reviewed	Sodium/potassium-transporting ATPase subunit alpha-2 (Na(+)/K(+) ATPase alpha-2 subunit) (EC 3.6.3.9) (Sodium pump subunit alpha-2)	ATP1A2 KIAA0778	Homo sapiens (Human)	1020
P13637	AT1A3_HUMAN	reviewed	Sodium/potassium-transporting ATPase subunit alpha-3 (Na(+)/K(+) ATPase alpha-3 subunit) (EC 3.6.3.9) (Na(+)/K(+) ATPase alpha(III) subunit) (Sodium pump subunit alpha-3)	ATP1A3	Homo sapiens (Human)	1013
P05026	AT1B1_HUMAN	reviewed	Sodium/potassium-transporting ATPase subunit beta-1 (Sodium/potassium-dependent ATPase subunit beta-1)	ATP1B1 ATP1B	Homo sapiens (Human)	303
P14415	AT1B2_HUMAN	reviewed	Sodium/potassium-transporting ATPase subunit beta-2 (Adhesion molecule in glia) (AMOG) (Sodium/potassium-dependent ATPase subunit beta-2)	ATP1B2	Homo sapiens (Human)	290
Q16720	AT2B3_HUMAN	reviewed	Plasma membrane calcium-transporting ATPase 3 (PMCA3) (EC 3.6.3.8) (Plasma membrane calcium ATPase isoform 3) (Plasma membrane calcium pump isoform 3)	ATP2B3	Homo sapiens (Human)	1220
P98198	AT8B2_HUMAN	reviewed	Phospholipid-transporting ATPase ID (EC 3.6.3.1) (ATPase class I type 8B member 2) (P4-ATPase flippase complex alpha subunit ATP8B2)	ATP8B2 ATPID KIAA1137	Homo sapiens (Human)	1209
P20648	ATP4A_HUMAN	reviewed	Potassium-transporting ATPase alpha chain 1 (EC 3.6.3.10) (Gastric H(+)/K(+) ATPase subunit alpha) (Proton pump)	ATP4A	Homo sapiens (Human)	1035
Q9NY37	ASIC5_HUMAN	reviewed	Acid-sensing ion channel 5 (ASIC5) (Amiloride-sensitive cation channel 5) (Human intestine Na(+) channel) (HINaC)	ASIC5 ACCN5 HINAC	Homo sapiens (Human)	505
Q6HA08	ASTL_HUMAN	reviewed	Astacin-like metalloendopeptidase (EC 3.4.-.-) (Oocyte astacin) (Ovastacin)	ASTL	Homo sapiens (Human)	431
Q9P241	AT10D_HUMAN	reviewed	Probable phospholipid-transporting ATPase VD (EC 3.6.3.1) (ATPase class V type 10D) (P4-ATPase flippase complex alpha subunit ATP10D)	ATP10D ATPVD KIAA1487	Homo sapiens (Human)	1426
P54709	AT1B3_HUMAN	reviewed	Sodium/potassium-transporting ATPase subunit beta-3 (Sodium/potassium-dependent ATPase subunit beta-3) (ATPB-3) (CD antigen CD298)	ATP1B3	Homo sapiens (Human)	279
Q9NTI2	AT8A2_HUMAN	reviewed	Phospholipid-transporting ATPase IB (EC 3.6.3.1) (ATPase class I type 8A member 2) (ML-1) (P4-ATPase flippase complex alpha subunit ATP8A2)	ATP8A2 ATPIB	Homo sapiens (Human)	1148
Q04656	ATP7A_HUMAN	reviewed	Copper-transporting ATPase 1 (EC 3.6.3.54) (Copper pump 1) (Menkes disease-associated protein)	ATP7A MC1 MNK	Homo sapiens (Human)	1500
O15169	AXIN1_HUMAN	reviewed	Axin-1 (Axis inhibition protein 1) (hAxin)	AXIN1 AXIN	Homo sapiens (Human)	862
P23634	AT2B4_HUMAN	reviewed	Plasma membrane calcium-transporting ATPase 4 (PMCA4) (EC 3.6.3.8) (Matrix-remodeling-associated protein 1) (Plasma membrane calcium ATPase isoform 4) (Plasma membrane calcium pump isoform 4)	ATP2B4 ATP2B2 MXRA1	Homo sapiens (Human)	1241
P18848	ATF4_HUMAN	reviewed	Cyclic AMP-dependent transcription factor ATF-4 (cAMP-dependent transcription factor ATF-4) (Activating transcription factor 4) (Cyclic AMP-responsive element-binding protein 2) (CREB-2) (cAMP-responsive element-binding protein 2) (DNA-binding protein TAXREB67) (Tax-responsive enhancer element-binding protein 67) (TaxREB67)	ATF4 CREB2 TXREB	Homo sapiens (Human)	351
P25705	ATPA_HUMAN	reviewed	ATP synthase subunit alpha, mitochondrial	ATP5A1 ATP5A ATP5AL2 ATPM	Homo sapiens (Human)	553
P80723	BASP1_HUMAN	reviewed	Brain acid soluble protein 1 (22 kDa neuronal tissue-enriched acidic protein) (Neuronal axonal membrane protein NAP-22)	BASP1 NAP22	Homo sapiens (Human)	227
Q8TF62	AT8B4_HUMAN	reviewed	Probable phospholipid-transporting ATPase IM (EC 3.6.3.1) (ATPase class I type 8B member 4) (P4-ATPase flippase complex alpha subunit ATP8B4)	ATP8B4 KIAA1939	Homo sapiens (Human)	1192
Q8NBU5	ATAD1_HUMAN	reviewed	ATPase family AAA domain-containing protein 1 (EC 3.6.1.3) (Thorase)	ATAD1 FNP001	Homo sapiens (Human)	361
Q13705	AVR2B_HUMAN	reviewed	Activin receptor type-2B (EC 2.7.11.30) (Activin receptor type IIB) (ACTR-IIB)	ACVR2B	Homo sapiens (Human)	512
P15291	B4GT1_HUMAN	reviewed	Beta-1,4-galactosyltransferase 1 (Beta-1,4-GalTase 1) (Beta4Gal-T1) (b4Gal-T1) (EC 2.4.1.-) (UDP-Gal:beta-GlcNAc beta-1,4-galactosyltransferase 1) (UDP-galactose:beta-N-acetylglucosamine beta-1,4-galactosyltransferase 1) [Cleaved into: Processed beta-1,4-galactosyltransferase 1] [Includes: Lactose synthase A protein (EC 2.4.1.22); N-acetyllactosamine synthase (EC 2.4.1.90) (Nal synthase); Beta-N-…	B4GALT1 GGTB2	Homo sapiens (Human)	398
O14514	BAI1_HUMAN	reviewed	Brain-specific angiogenesis inhibitor 1	BAI1	Homo sapiens (Human)	1584
P35613	BASI_HUMAN	reviewed	Basigin (5F7) (Collagenase stimulatory factor) (Extracellular matrix metalloproteinase inducer) (EMMPRIN) (Leukocyte activation antigen M6) (OK blood group antigen) (Tumor cell-derived collagenase stimulatory factor) (TCSF) (CD antigen CD147)	BSG UNQ6505/PRO21383	Homo sapiens (Human)	385
Q8NFJ9	BBS1_HUMAN	reviewed	Bardet-Biedl syndrome 1 protein (BBS2-like protein 2)	BBS1 BBS2L2	Homo sapiens (Human)	593
Q6ZUJ8	BCAP_HUMAN	reviewed	Phosphoinositide 3-kinase adapter protein 1 (B-cell adapter for phosphoinositide 3-kinase) (B-cell phosphoinositide 3-kinase adapter protein 1)	PIK3AP1 BCAP	Homo sapiens (Human)	805
Q8N1M1	BEST3_HUMAN	reviewed	Bestrophin-3 (Vitelliform macular dystrophy 2-like protein 3)	BEST3 VMD2L3	Homo sapiens (Human)	668
O76090	BEST1_HUMAN	reviewed	Bestrophin-1 (TU15B) (Vitelliform macular dystrophy protein 2)	BEST1 VMD2	Homo sapiens (Human)	585
O75882	ATRN_HUMAN	reviewed	Attractin (DPPT-L) (Mahogany homolog)	ATRN KIAA0548 MGCA	Homo sapiens (Human)	1429
P02730	B3AT_HUMAN	reviewed	Band 3 anion transport protein (Anion exchange protein 1) (AE 1) (Anion exchanger 1) (Solute carrier family 4 member 1) (CD antigen CD233)	SLC4A1 AE1 DI EPB3	Homo sapiens (Human)	911
P82251	BAT1_HUMAN	reviewed	b(0,+)-type amino acid transporter 1 (b(0,+)AT1) (Glycoprotein-associated amino acid transporter b0,+AT1) (Solute carrier family 7 member 9)	SLC7A9 BAT1	Homo sapiens (Human)	487
Q8IWZ6	BBS7_HUMAN	reviewed	Bardet-Biedl syndrome 7 protein (BBS2-like protein 1)	BBS7 BBS2L1	Homo sapiens (Human)	715
P11274	BCR_HUMAN	reviewed	Breakpoint cluster region protein (EC 2.7.11.1) (Renal carcinoma antigen NY-REN-26)	BCR BCR1 D22S11	Homo sapiens (Human)	1271
Q12934	BFSP1_HUMAN	reviewed	Filensin (Beaded filament structural protein 1) (Lens fiber cell beaded-filament structural protein CP 115) (CP115) (Lens intermediate filament-like heavy) (LIFL-H)	BFSP1	Homo sapiens (Human)	665
Q13515	BFSP2_HUMAN	reviewed	Phakinin (49 kDa cytoskeletal protein) (Beaded filament structural protein 2) (Lens fiber cell beaded filament protein CP 47) (CP47) (Lens fiber cell beaded filament protein CP 49) (CP49) (Lens intermediate filament-like light) (LIFL-L)	BFSP2	Homo sapiens (Human)	415
P46663	BKRB1_HUMAN	reviewed	B1 bradykinin receptor (B1R) (BK-1 receptor)	BDKRB1 BRADYB1	Homo sapiens (Human)	353
Q8NFU1	BEST2_HUMAN	reviewed	Bestrophin-2 (Vitelliform macular dystrophy 2-like protein 1)	BEST2 VMD2L1	Homo sapiens (Human)	509
Q9UBW5	BIN2_HUMAN	reviewed	Bridging integrator 2 (Breast cancer-associated protein 1)	BIN2 BRAP1	Homo sapiens (Human)	565
Q9BWV1	BOC_HUMAN	reviewed	Brother of CDO (Protein BOC)	BOC UNQ604/PRO1190	Homo sapiens (Human)	1114
Q8WZ55	BSND_HUMAN	reviewed	Barttin	BSND BART	Homo sapiens (Human)	320
Q9BXC9	BBS2_HUMAN	reviewed	Bardet-Biedl syndrome 2 protein	BBS2	Homo sapiens (Human)	721
Q8N3I7	BBS5_HUMAN	reviewed	Bardet-Biedl syndrome 5 protein	BBS5	Homo sapiens (Human)	341
P51451	BLK_HUMAN	reviewed	Tyrosine-protein kinase Blk (EC 2.7.10.2) (B lymphocyte kinase) (p55-Blk)	BLK	Homo sapiens (Human)	505
O00238	BMR1B_HUMAN	reviewed	Bone morphogenetic protein receptor type-1B (BMP type-1B receptor) (BMPR-1B) (EC 2.7.11.30) (CD antigen CDw293)	BMPR1B	Homo sapiens (Human)	502
O00481	BT3A1_HUMAN	reviewed	Butyrophilin subfamily 3 member A1 (CD antigen CD277)	BTN3A1 BTF5	Homo sapiens (Human)	513
Q86YS7	C2CD5_HUMAN	reviewed	C2 domain-containing protein 5 (C2 domain-containing phosphoprotein of 138 kDa)	C2CD5 CDP138 KIAA0528	Homo sapiens (Human)	1000
Q96RK4	BBS4_HUMAN	reviewed	Bardet-Biedl syndrome 4 protein	BBS4	Homo sapiens (Human)	519
Q10588	BST1_HUMAN	reviewed	ADP-ribosyl cyclase/cyclic ADP-ribose hydrolase 2 (EC 3.2.2.6) (ADP-ribosyl cyclase 2) (Bone marrow stromal antigen 1) (BST-1) (Cyclic ADP-ribose hydrolase 2) (cADPr hydrolase 2) (CD antigen CD157)	BST1	Homo sapiens (Human)	318
P78410	BT3A2_HUMAN	reviewed	Butyrophilin subfamily 3 member A2	BTN3A2 BT3.2 BTF3 BTF4	Homo sapiens (Human)	334
Q9NZU7	CABP1_HUMAN	reviewed	Calcium-binding protein 1 (CaBP1) (Calbrain) (Caldendrin)	CABP1	Homo sapiens (Human)	370
Q08289	CACB2_HUMAN	reviewed	Voltage-dependent L-type calcium channel subunit beta-2 (CAB2) (Calcium channel voltage-dependent subunit beta 2) (Lambert-Eaton myasthenic syndrome antigen B) (MYSB)	CACNB2 CACNLB2 MYSB	Homo sapiens (Human)	660
Q8NFU0	BEST4_HUMAN	reviewed	Bestrophin-4 (Vitelliform macular dystrophy 2-like protein 2)	BEST4 VMD2L2	Homo sapiens (Human)	473
Q6UXY1	BI2L2_HUMAN	reviewed	Brain-specific angiogenesis inhibitor 1-associated protein 2-like protein 2 (BAI1-associated protein 2-like protein 2) (Planar intestinal- and kidney-specific BAR domain protein) (Pinkbar)	BAIAP2L2 UNQ9336/PRO34007	Homo sapiens (Human)	529
O00478	BT3A3_HUMAN	reviewed	Butyrophilin subfamily 3 member A3	BTN3A3 BTF3	Homo sapiens (Human)	584
Q9P296	C5AR2_HUMAN	reviewed	C5a anaphylatoxin chemotactic receptor 2 (Complement component 5a receptor 2) (G-protein coupled receptor 77)	C5AR2 C5L2 GPR77	Homo sapiens (Human)	337
Q9BRK5	CAB45_HUMAN	reviewed	45 kDa calcium-binding protein (Cab45) (Stromal cell-derived factor 4) (SDF-4)	SDF4 CAB45 PSEC0034	Homo sapiens (Human)	362
Q86V35	CABP7_HUMAN	reviewed	Calcium-binding protein 7 (CaBP7) (Calneuron II) (Calneuron-2)	CABP7 CALN2	Homo sapiens (Human)	215
P55289	CAD12_HUMAN	reviewed	Cadherin-12 (Brain cadherin) (BR-cadherin) (Neural type cadherin 2) (N-cadherin 2)	CDH12	Homo sapiens (Human)	794
Q9UJ99	CAD22_HUMAN	reviewed	Cadherin-22 (Pituitary and brain cadherin) (PB-cadherin)	CDH22 C20orf25	Homo sapiens (Human)	828
Q9H251	CAD23_HUMAN	reviewed	Cadherin-23 (Otocadherin)	CDH23 KIAA1774 KIAA1812 UNQ1894/PRO4340	Homo sapiens (Human)	3354
Q8IXH8	CAD26_HUMAN	reviewed	Cadherin-like protein 26 (Cadherin-like protein VR20)	CDH26	Homo sapiens (Human)	852
P19022	CADH2_HUMAN	reviewed	Cadherin-2 (CDw325) (Neural cadherin) (N-cadherin) (CD antigen CD325)	CDH2 CDHN NCAD	Homo sapiens (Human)	906
P55285	CADH6_HUMAN	reviewed	Cadherin-6 (Kidney cadherin) (K-cadherin)	CDH6	Homo sapiens (Human)	790
Q9ULB5	CADH7_HUMAN	reviewed	Cadherin-7	CDH7 CDH7L1	Homo sapiens (Human)	785
P55286	CADH8_HUMAN	reviewed	Cadherin-8	CDH8	Homo sapiens (Human)	799
Q8IU99	CAHM1_HUMAN	reviewed	Calcium homeostasis modulator protein 1 (Protein FAM26C)	CALHM1 FAM26C	Homo sapiens (Human)	346
P30988	CALCR_HUMAN	reviewed	Calcitonin receptor (CT-R)	CALCR	Homo sapiens (Human)	508
P17655	CAN2_HUMAN	reviewed	Calpain-2 catalytic subunit (EC 3.4.22.53) (Calcium-activated neutral proteinase 2) (CANP 2) (Calpain M-type) (Calpain large polypeptide L2) (Calpain-2 large subunit) (Millimolar-calpain) (M-calpain)	CAPN2 CANPL2	Homo sapiens (Human)	700
Q8WV28	BLNK_HUMAN	reviewed	B-cell linker protein (B-cell adapter containing a SH2 domain protein) (B-cell adapter containing a Src homology 2 domain protein) (Cytoplasmic adapter protein) (Src homology 2 domain-containing leukocyte protein of 65 kDa) (SLP-65)	BLNK BASH SLP65	Homo sapiens (Human)	456
Q13873	BMPR2_HUMAN	reviewed	Bone morphogenetic protein receptor type-2 (BMP type-2 receptor) (BMPR-2) (EC 2.7.11.30) (Bone morphogenetic protein receptor type II) (BMP type II receptor) (BMPR-II)	BMPR2 PPH1	Homo sapiens (Human)	1038
P15056	BRAF_HUMAN	reviewed	Serine/threonine-protein kinase B-raf (EC 2.7.11.1) (Proto-oncogene B-Raf) (p94) (v-Raf murine sarcoma viral oncogene homolog B1)	BRAF BRAF1 RAFB1	Homo sapiens (Human)	766
Q10589	BST2_HUMAN	reviewed	Bone marrow stromal antigen 2 (BST-2) (HM1.24 antigen) (Tetherin) (CD antigen CD317)	BST2	Homo sapiens (Human)	180
P35070	BTC_HUMAN	reviewed	Probetacellulin [Cleaved into: Betacellulin (BTC)]	BTC	Homo sapiens (Human)	178
Q86VB7	C163A_HUMAN	reviewed	Scavenger receptor cysteine-rich type 1 protein M130 (Hemoglobin scavenger receptor) (CD antigen CD163) [Cleaved into: Soluble CD163 (sCD163)]	CD163 M130	Homo sapiens (Human)	1156
Q8TCZ2	C99L2_HUMAN	reviewed	CD99 antigen-like protein 2 (MIC2-like protein 1) (CD antigen CD99)	CD99L2 MIC2L1 UNQ1964/PRO4486	Homo sapiens (Human)	262
Q8IVY1	CA210_HUMAN	reviewed	Type III endosome membrane protein TEMP (TEMP)	C1orf210	Homo sapiens (Human)	113
Q9Y6N8	CAD10_HUMAN	reviewed	Cadherin-10 (T2-cadherin)	CDH10	Homo sapiens (Human)	788
P55290	CAD13_HUMAN	reviewed	Cadherin-13 (Heart cadherin) (H-cadherin) (P105) (Truncated cadherin) (T-cad) (T-cadherin)	CDH13 CDHH	Homo sapiens (Human)	713
Q12864	CAD17_HUMAN	reviewed	Cadherin-17 (Intestinal peptide-associated transporter HPT-1) (Liver-intestine cadherin) (LI-cadherin)	CDH17	Homo sapiens (Human)	832
P55283	CADH4_HUMAN	reviewed	Cadherin-4 (Retinal cadherin) (R-CAD) (R-cadherin)	CDH4	Homo sapiens (Human)	916
P33151	CADH5_HUMAN	reviewed	Cadherin-5 (7B4 antigen) (Vascular endothelial cadherin) (VE-cadherin) (CD antigen CD144)	CDH5	Homo sapiens (Human)	784
P00918	CAH2_HUMAN	reviewed	Carbonic anhydrase 2 (EC 4.2.1.1) (Carbonate dehydratase II) (Carbonic anhydrase C) (CAC) (Carbonic anhydrase II) (CA-II)	CA2	Homo sapiens (Human)	260
Q07021	C1QBP_HUMAN	reviewed	Complement component 1 Q subcomponent-binding protein, mitochondrial (ASF/SF2-associated protein p32) (Glycoprotein gC1qBP) (C1qBP) (Hyaluronan-binding protein 1) (Mitochondrial matrix protein p32) (gC1q-R protein) (p33)	C1QBP GC1QBP HABP1 SF2P32	Homo sapiens (Human)	282
Q16581	C3AR_HUMAN	reviewed	C3a anaphylatoxin chemotactic receptor (C3AR) (C3a-R)	C3AR1 AZ3B C3R1 HNFAG09	Homo sapiens (Human)	482
Q9NRR8	C42S1_HUMAN	reviewed	CDC42 small effector protein 1 (CDC42-binding protein SCIP1) (Small effector of CDC42 protein 1)	CDC42SE1 SPEC1	Homo sapiens (Human)	79
Q9NRR3	C42S2_HUMAN	reviewed	CDC42 small effector protein 2 (Small effector of CDC42 protein 2)	CDC42SE2 SPEC2	Homo sapiens (Human)	84
Q8N3J6	CADM2_HUMAN	reviewed	Cell adhesion molecule 2 (Immunoglobulin superfamily member 4D) (IgSF4D) (Nectin-like protein 3) (NECL-3) (Synaptic cell adhesion molecule 2) (SynCAM 2)	CADM2 IGSF4D NECL3	Homo sapiens (Human)	435
P07384	CAN1_HUMAN	reviewed	Calpain-1 catalytic subunit (EC 3.4.22.52) (Calcium-activated neutral proteinase 1) (CANP 1) (Calpain mu-type) (Calpain-1 large subunit) (Cell proliferation-inducing gene 30 protein) (Micromolar-calpain) (muCANP)	CAPN1 CANPL1 PIG30	Homo sapiens (Human)	714
P30411	BKRB2_HUMAN	reviewed	B2 bradykinin receptor (B2R) (BK-2 receptor)	BDKRB2 BKR2	Homo sapiens (Human)	391
P32247	BRS3_HUMAN	reviewed	Bombesin receptor subtype-3 (BRS-3)	BRS3	Homo sapiens (Human)	399
O95971	BY55_HUMAN	reviewed	CD160 antigen (Natural killer cell receptor BY55) (CD antigen CD160)	CD160 BY55	Homo sapiens (Human)	181
Q13936	CAC1C_HUMAN	reviewed	Voltage-dependent L-type calcium channel subunit alpha-1C (Calcium channel, L type, alpha-1 polypeptide, isoform 1, cardiac muscle) (Voltage-gated calcium channel subunit alpha Cav1.2)	CACNA1C CACH2 CACN2 CACNL1A1 CCHL1A1	Homo sapiens (Human)	2221
Q02641	CACB1_HUMAN	reviewed	Voltage-dependent L-type calcium channel subunit beta-1 (CAB1) (Calcium channel voltage-dependent subunit beta 1)	CACNB1 CACNLB1	Homo sapiens (Human)	598
Q13634	CAD18_HUMAN	reviewed	Cadherin-18 (Cadherin-14)	CDH18 CDH14	Homo sapiens (Human)	790
Q9NYX4	CALY_HUMAN	reviewed	Neuron-specific vesicular protein calcyon	CALY DRD1IP	Homo sapiens (Human)	217
Q5VZK9	CARL1_HUMAN	reviewed	F-actin-uncapping protein LRRC16A (CARMIL homolog) (Capping protein, Arp2/3 and myosin-I linker homolog 1) (Capping protein, Arp2/3 and myosin-I linker protein 1) (Leucine-rich repeat-containing protein 16A)	LRRC16A CARMIL CARMIL1 LRRC16	Homo sapiens (Human)	1371
Q03135	CAV1_HUMAN	reviewed	Caveolin-1	CAV1 CAV	Homo sapiens (Human)	178
Q9NR16	C163B_HUMAN	reviewed	Scavenger receptor cysteine-rich type 1 protein M160 (CD163 antigen-like 1) (CD antigen CD163b)	CD163L1 CD163B M160 UNQ6434/PRO23202	Homo sapiens (Human)	1453
Q86UP0	CAD24_HUMAN	reviewed	Cadherin-24	CDH24 CDH11L UNQ2834/PRO34009	Homo sapiens (Human)	819
Q9BY67	CADM1_HUMAN	reviewed	Cell adhesion molecule 1 (Immunoglobulin superfamily member 4) (IgSF4) (Nectin-like protein 2) (NECL-2) (Spermatogenic immunoglobulin superfamily) (SgIgSF) (Synaptic cell adhesion molecule) (SynCAM) (Tumor suppressor in lung cancer 1) (TSLC-1)	CADM1 IGSF4 IGSF4A NECL2 SYNCAM TSLC1	Homo sapiens (Human)	442
P22748	CAH4_HUMAN	reviewed	Carbonic anhydrase 4 (EC 4.2.1.1) (Carbonate dehydratase IV) (Carbonic anhydrase IV) (CA-IV)	CA4	Homo sapiens (Human)	312
Q16602	CALRL_HUMAN	reviewed	Calcitonin gene-related peptide type 1 receptor (CGRP type 1 receptor) (Calcitonin receptor-like receptor)	CALCRL CGRPR	Homo sapiens (Human)	461
P40123	CAP2_HUMAN	reviewed	Adenylyl cyclase-associated protein 2 (CAP 2)	CAP2	Homo sapiens (Human)	477
P51636	CAV2_HUMAN	reviewed	Caveolin-2	CAV2	Homo sapiens (Human)	162
P56539	CAV3_HUMAN	reviewed	Caveolin-3 (M-caveolin)	CAV3	Homo sapiens (Human)	151
P23435	CBLN1_HUMAN	reviewed	Cerebellin-1 (Precerebellin) [Cleaved into: Cerebellin (CER); [des-Ser1]-cerebellin]	CBLN1	Homo sapiens (Human)	193
P14384	CBPM_HUMAN	reviewed	Carboxypeptidase M (CPM) (EC 3.4.17.12)	CPM	Homo sapiens (Human)	443
Q9UF02	CCG5_HUMAN	reviewed	Voltage-dependent calcium channel gamma-5 subunit (Neuronal voltage-gated calcium channel gamma-5 subunit) (Transmembrane AMPAR regulatory protein gamma-5) (TARP gamma-5)	CACNG5	Homo sapiens (Human)	275
Q8WXS5	CCG8_HUMAN	reviewed	Voltage-dependent calcium channel gamma-8 subunit (Neuronal voltage-gated calcium channel gamma-8 subunit) (Transmembrane AMPAR regulatory protein gamma-8) (TARP gamma-8)	CACNG8 CACNG6	Homo sapiens (Human)	425
P21730	C5AR1_HUMAN	reviewed	C5a anaphylatoxin chemotactic receptor 1 (C5a anaphylatoxin chemotactic receptor) (C5a-R) (C5aR) (CD antigen CD88)	C5AR1 C5AR C5R1	Homo sapiens (Human)	350
Q9NPB3	CABP2_HUMAN	reviewed	Calcium-binding protein 2 (CaBP2)	CABP2	Homo sapiens (Human)	220
Q9BXU9	CABP8_HUMAN	reviewed	Calcium-binding protein 8 (CaBP8) (Calneuron I) (Calneuron-1)	CALN1 CABP8	Homo sapiens (Human)	219
Q9HBT6	CAD20_HUMAN	reviewed	Cadherin-20	CDH20 CDH7L3	Homo sapiens (Human)	801
Q16790	CAH9_HUMAN	reviewed	Carbonic anhydrase 9 (EC 4.2.1.1) (Carbonate dehydratase IX) (Carbonic anhydrase IX) (CA-IX) (CAIX) (Membrane antigen MN) (P54/58N) (Renal cell carcinoma-associated antigen G250) (RCC-associated antigen G250) (pMW1)	CA9 G250 MN	Homo sapiens (Human)	459
Q8NCB2	CAMKV_HUMAN	reviewed	CaM kinase-like vesicle-associated protein	CAMKV	Homo sapiens (Human)	501
P63098	CANB1_HUMAN	reviewed	Calcineurin subunit B type 1 (Protein phosphatase 2B regulatory subunit 1) (Protein phosphatase 3 regulatory subunit B alpha isoform 1)	PPP3R1 CNA2 CNB	Homo sapiens (Human)	170
Q6F5E8	CARL2_HUMAN	reviewed	F-actin-uncapping protein RLTPR (Capping protein, Arp2/3 and myosin-I linker protein 2) (CARMIL2) (Leucine-rich repeat-containing protein 16C) (RGD, leucine-rich repeat, tropomodulin and proline-rich-containing protein)	RLTPR LRRC16C	Homo sapiens (Human)	1435
P41180	CASR_HUMAN	reviewed	Extracellular calcium-sensing receptor (CaSR) (Parathyroid cell calcium-sensing receptor 1) (PCaR1)	CASR GPRC2A PCAR1	Homo sapiens (Human)	1078
Q8N350	CBARP_HUMAN	reviewed	Voltage-dependent calcium channel beta subunit-associated regulatory protein	CBARP C19orf26	Homo sapiens (Human)	705
O75976	CBPD_HUMAN	reviewed	Carboxypeptidase D (EC 3.4.17.22) (Metallocarboxypeptidase D) (gp180)	CPD	Homo sapiens (Human)	1380
A2IDD5	CCD78_HUMAN	reviewed	Coiled-coil domain-containing protein 78 (hsCCDC78)	CCDC78 C16orf25 JFP10	Homo sapiens (Human)	438
P46092	CCR10_HUMAN	reviewed	C-C chemokine receptor type 10 (C-C CKR-10) (CC-CKR-10) (CCR-10) (G-protein coupled receptor 2)	CCR10 GPR2	Homo sapiens (Human)	362
P55287	CAD11_HUMAN	reviewed	Cadherin-11 (OSF-4) (Osteoblast cadherin) (OB-cadherin)	CDH11	Homo sapiens (Human)	796
P55291	CAD15_HUMAN	reviewed	Cadherin-15 (Cadherin-14) (Muscle cadherin) (M-cadherin)	CDH15 CDH14 CDH3	Homo sapiens (Human)	814
O75309	CAD16_HUMAN	reviewed	Cadherin-16 (Kidney-specific cadherin) (Ksp-cadherin)	CDH16 UNQ695/PRO1340	Homo sapiens (Human)	829
Q9H159	CAD19_HUMAN	reviewed	Cadherin-19	CDH19 CDH7L2 UNQ478/PRO941	Homo sapiens (Human)	772
P12830	CADH1_HUMAN	reviewed	Cadherin-1 (CAM 120/80) (Epithelial cadherin) (E-cadherin) (Uvomorulin) (CD antigen CD324) [Cleaved into: E-Cad/CTF1; E-Cad/CTF2; E-Cad/CTF3]	CDH1 CDHE UVO	Homo sapiens (Human)	882
P22223	CADH3_HUMAN	reviewed	Cadherin-3 (Placental cadherin) (P-cadherin)	CDH3 CDHP	Homo sapiens (Human)	829
Q9ULB4	CADH9_HUMAN	reviewed	Cadherin-9	CDH9	Homo sapiens (Human)	789
Q8N126	CADM3_HUMAN	reviewed	Cell adhesion molecule 3 (Brain immunoglobulin receptor) (Immunoglobulin superfamily member 4B) (IgSF4B) (Nectin-like protein 1) (NECL-1) (Synaptic cell adhesion molecule 3) (SynCAM3) (TSLC1-like protein 1) (TSLL1)	CADM3 IGSF4B NECL1 SYNCAM3 TSLL1 UNQ225/PRO258	Homo sapiens (Human)	398
Q3MIR4	CC50B_HUMAN	reviewed	Cell cycle control protein 50B (P4-ATPase flippase complex beta subunit TMEM30B) (Transmembrane protein 30B)	TMEM30B CDC50B	Homo sapiens (Human)	351
P41597	CCR2_HUMAN	reviewed	C-C chemokine receptor type 2 (C-C CKR-2) (CC-CKR-2) (CCR-2) (CCR2) (Monocyte chemoattractant protein 1 receptor) (MCP-1-R) (CD antigen CD192)	CCR2 CMKBR2	Homo sapiens (Human)	374
P51684	CCR6_HUMAN	reviewed	C-C chemokine receptor type 6 (C-C CKR-6) (CC-CKR-6) (CCR-6) (Chemokine receptor-like 3) (CKR-L3) (DRY6) (G-protein coupled receptor 29) (GPR-CY4) (GPRCY4) (LARC receptor) (CD antigen CD196)	CCR6 CKRL3 CMKBR6 GPR29 STRL22	Homo sapiens (Human)	374
P51686	CCR9_HUMAN	reviewed	C-C chemokine receptor type 9 (C-C CKR-9) (CC-CKR-9) (CCR-9) (G-protein coupled receptor 28) (GPR-9-6) (CD antigen CDw199)	CCR9 GPR28	Homo sapiens (Human)	369
P15813	CD1D_HUMAN	reviewed	Antigen-presenting glycoprotein CD1d (R3G1) (CD antigen CD1d)	CD1D	Homo sapiens (Human)	335
Q9NNX6	CD209_HUMAN	reviewed	CD209 antigen (C-type lectin domain family 4 member L) (Dendritic cell-specific ICAM-3-grabbing non-integrin 1) (DC-SIGN) (DC-SIGN1) (CD antigen CD209)	CD209 CLEC4L	Homo sapiens (Human)	404
Q9BZW8	CD244_HUMAN	reviewed	Natural killer cell receptor 2B4 (NK cell activation-inducing ligand) (NAIL) (NK cell type I receptor protein 2B4) (NKR2B4) (h2B4) (SLAM family member 4) (SLAMF4) (Signaling lymphocytic activation molecule 4) (CD antigen CD244)	CD244 2B4	Homo sapiens (Human)	370
P25063	CD24_HUMAN	reviewed	Signal transducer CD24 (Small cell lung carcinoma cluster 4 antigen) (CD antigen CD24)	CD24 CD24A	Homo sapiens (Human)	80
P34810	CD68_HUMAN	reviewed	Macrosialin (Gp110) (CD antigen CD68)	CD68	Homo sapiens (Human)	354
P40259	CD79B_HUMAN	reviewed	B-cell antigen receptor complex-associated protein beta chain (B-cell-specific glycoprotein B29) (Ig-beta) (Immunoglobulin-associated B29 protein) (CD antigen CD79b)	CD79B B29 IGB	Homo sapiens (Human)	229
P01732	CD8A_HUMAN	reviewed	T-cell surface glycoprotein CD8 alpha chain (T-lymphocyte differentiation antigen T8/Leu-2) (CD antigen CD8a)	CD8A MAL	Homo sapiens (Human)	235
Q01518	CAP1_HUMAN	reviewed	Adenylyl cyclase-associated protein 1 (CAP 1)	CAP1 CAP	Homo sapiens (Human)	475
Q8ND23	CARL3_HUMAN	reviewed	Leucine-rich repeat-containing protein 16B (Capping protein, Arp2/3 and myosin-I linker protein 3) (CARMIL3)	LRRC16B C14orf121	Homo sapiens (Human)	1372
Q7Z7H3	CATIP_HUMAN	reviewed	Ciliogenesis-associated TTC17-interacting protein	CATIP C2orf62	Homo sapiens (Human)	387
Q9UBN1	CCG4_HUMAN	reviewed	Voltage-dependent calcium channel gamma-4 subunit (Neuronal voltage-gated calcium channel gamma-4 subunit) (Transmembrane AMPAR regulatory protein gamma-4) (TARP gamma-4)	CACNG4	Homo sapiens (Human)	327
P51681	CCR5_HUMAN	reviewed	C-C chemokine receptor type 5 (C-C CKR-5) (CC-CKR-5) (CCR-5) (CCR5) (CHEMR13) (HIV-1 fusion coreceptor) (CD antigen CD195)	CCR5 CMKBR5	Homo sapiens (Human)	352
O00421	CCRL2_HUMAN	reviewed	C-C chemokine receptor-like 2 (Chemokine receptor CCR11) (Chemokine receptor X) (Putative MCP-1 chemokine receptor)	CCRL2 CCR11 CCR6 CKRX CRAM HCR	Homo sapiens (Human)	344
P08571	CD14_HUMAN	reviewed	Monocyte differentiation antigen CD14 (Myeloid cell-specific leucine-rich glycoprotein) (CD antigen CD14) [Cleaved into: Monocyte differentiation antigen CD14, urinary form; Monocyte differentiation antigen CD14, membrane-bound form]	CD14	Homo sapiens (Human)	375
Q8N6Q3	CD177_HUMAN	reviewed	CD177 antigen (Human neutrophil alloantigen 2a) (HNA-2a) (NB1 glycoprotein) (NB1 GP) (Polycythemia rubra vera protein 1) (PRV-1) (CD antigen CD177)	CD177 NB1 PRV1 UNQ595/PRO1181	Homo sapiens (Human)	437
P06126	CD1A_HUMAN	reviewed	T-cell surface glycoprotein CD1a (T-cell surface antigen T6/Leu-6) (hTa1 thymocyte antigen) (CD antigen CD1a)	CD1A	Homo sapiens (Human)	327
P20273	CD22_HUMAN	reviewed	B-cell receptor CD22 (B-lymphocyte cell adhesion molecule) (BL-CAM) (Sialic acid-binding Ig-like lectin 2) (Siglec-2) (T-cell surface antigen Leu-14) (CD antigen CD22)	CD22 SIGLEC2	Homo sapiens (Human)	847
P06127	CD5_HUMAN	reviewed	T-cell surface glycoprotein CD5 (Lymphocyte antigen T1/Leu-1) (CD antigen CD5)	CD5 LEU1	Homo sapiens (Human)	495
P10966	CD8B_HUMAN	reviewed	T-cell surface glycoprotein CD8 beta chain (CD antigen CD8b)	CD8B CD8B1	Homo sapiens (Human)	210
P21926	CD9_HUMAN	reviewed	CD9 antigen (5H9 antigen) (Cell growth-inhibiting gene 2 protein) (Leukocyte antigen MIC3) (Motility-related protein) (MRP-1) (Tetraspanin-29) (Tspan-29) (p24) (CD antigen CD9)	CD9 MIC3 TSPAN29 GIG2	Homo sapiens (Human)	228
Q9H5V8	CDCP1_HUMAN	reviewed	CUB domain-containing protein 1 (Membrane glycoprotein gp140) (Subtractive immunization M plus HEp3-associated 135 kDa protein) (SIMA135) (Transmembrane and associated with src kinases) (CD antigen CD318)	CDCP1 TRASK UNQ2486/PRO5773	Homo sapiens (Human)	836
Q00535	CDK5_HUMAN	reviewed	Cyclin-dependent-like kinase 5 (EC 2.7.11.1) (Cell division protein kinase 5) (Serine/threonine-protein kinase PSSALRE) (Tau protein kinase II catalytic subunit) (TPKII catalytic subunit)	CDK5 CDKN5	Homo sapiens (Human)	292
Q4KMG0	CDON_HUMAN	reviewed	Cell adhesion molecule-related/down-regulated by oncogenes	CDON CDO	Homo sapiens (Human)	1287
Q14002	CEAM7_HUMAN	reviewed	Carcinoembryonic antigen-related cell adhesion molecule 7 (Carcinoembryonic antigen CGM2)	CEACAM7 CGM2	Homo sapiens (Human)	265
Q9NV96	CC50A_HUMAN	reviewed	Cell cycle control protein 50A (P4-ATPase flippase complex beta subunit TMEM30A) (Transmembrane protein 30A)	TMEM30A C6orf67 CDC50A	Homo sapiens (Human)	361
P32246	CCR1_HUMAN	reviewed	C-C chemokine receptor type 1 (C-C CKR-1) (CC-CKR-1) (CCR-1) (CCR1) (HM145) (LD78 receptor) (Macrophage inflammatory protein 1-alpha receptor) (MIP-1alpha-R) (RANTES-R) (CD antigen CD191)	CCR1 CMKBR1 CMKR1 SCYAR1	Homo sapiens (Human)	355
P51677	CCR3_HUMAN	reviewed	C-C chemokine receptor type 3 (C-C CKR-3) (CC-CKR-3) (CCR-3) (CCR3) (CKR3) (Eosinophil eotaxin receptor) (CD antigen CD193)	CCR3 CMKBR3	Homo sapiens (Human)	355
P29017	CD1C_HUMAN	reviewed	T-cell surface glycoprotein CD1c (CD antigen CD1c)	CD1C	Homo sapiens (Human)	333
P29965	CD40L_HUMAN	reviewed	CD40 ligand (CD40-L) (T-cell antigen Gp39) (TNF-related activation protein) (TRAP) (Tumor necrosis factor ligand superfamily member 5) (CD antigen CD154) [Cleaved into: CD40 ligand, membrane form; CD40 ligand, soluble form]	CD40LG CD40L TNFSF5 TRAP	Homo sapiens (Human)	261
P08962	CD63_HUMAN	reviewed	CD63 antigen (Granulophysin) (Lysosomal-associated membrane protein 3) (LAMP-3) (Melanoma-associated antigen ME491) (OMA81H) (Ocular melanoma-associated antigen) (Tetraspanin-30) (Tspan-30) (CD antigen CD63)	CD63 MLA1 TSPAN30	Homo sapiens (Human)	238
A6NJW9	CD8BL_HUMAN	reviewed	Putative T-cell surface glycoprotein CD8 beta-2 chain (CD8b pseudogene)	CD8BP CD8B2	Homo sapiens (Human)	211
Q96JP9	CDHR1_HUMAN	reviewed	Cadherin-related family member 1 (Photoreceptor cadherin) (prCAD) (Protocadherin-21)	CDHR1 KIAA1775 PCDH21 PRCAD	Homo sapiens (Human)	859
Q9BYE9	CDHR2_HUMAN	reviewed	Cadherin-related family member 2 (Protocadherin LKC) (PC-LKC) (Protocadherin-24)	CDHR2 PCDH24 PCLKC	Homo sapiens (Human)	1310
Q9HBB8	CDHR5_HUMAN	reviewed	Cadherin-related family member 5 (Mu-protocadherin) (Mucin and cadherin-like protein) (Mucin-like protocadherin) (MLPCDH)	CDHR5 MUCDHL MUPCDH UNQ2781/PRO7168	Homo sapiens (Human)	845
P31997	CEAM8_HUMAN	reviewed	Carcinoembryonic antigen-related cell adhesion molecule 8 (CD67 antigen) (Carcinoembryonic antigen CGM6) (Non-specific cross-reacting antigen NCA-95) (CD antigen CD66b)	CEACAM8 CGM6	Homo sapiens (Human)	349
P32238	CCKAR_HUMAN	reviewed	Cholecystokinin receptor type A (CCK-A receptor) (CCK-AR) (Cholecystokinin-1 receptor) (CCK1-R)	CCKAR CCKRA	Homo sapiens (Human)	428
P16671	CD36_HUMAN	reviewed	Platelet glycoprotein 4 (Fatty acid translocase) (FAT) (Glycoprotein IIIb) (GPIIIB) (Leukocyte differentiation antigen CD36) (PAS IV) (PAS-4) (Platelet collagen receptor) (Platelet glycoprotein IV) (GPIV) (Thrombospondin receptor) (CD antigen CD36)	CD36 GP3B GP4	Homo sapiens (Human)	472
P16070	CD44_HUMAN	reviewed	CD44 antigen (CDw44) (Epican) (Extracellular matrix receptor III) (ECMR-III) (GP90 lymphocyte homing/adhesion receptor) (HUTCH-I) (Heparan sulfate proteoglycan) (Hermes antigen) (Hyaluronate receptor) (Phagocytic glycoprotein 1) (PGP-1) (Phagocytic glycoprotein I) (PGP-I) (CD antigen CD44)	CD44 LHR MDU2 MDU3 MIC4	Homo sapiens (Human)	742
P31358	CD52_HUMAN	reviewed	CAMPATH-1 antigen (CDw52) (Cambridge pathology 1 antigen) (Epididymal secretory protein E5) (Human epididymis-specific protein 5) (He5) (CD antigen CD52)	CD52 CDW52 HE5	Homo sapiens (Human)	61
Q13319	CD5R2_HUMAN	reviewed	Cyclin-dependent kinase 5 activator 2 (CDK5 activator 2) (Cyclin-dependent kinase 5 regulatory subunit 2) (p39) (p39I)	CDK5R2 NCK5AI	Homo sapiens (Human)	367
Q15078	CD5R1_HUMAN	reviewed	Cyclin-dependent kinase 5 activator 1 (CDK5 activator 1) (Cyclin-dependent kinase 5 regulatory subunit 1) (TPKII regulatory subunit) [Cleaved into: Cyclin-dependent kinase 5 activator 1, p35 (p35); Cyclin-dependent kinase 5 activator 1, p25 (p25) (Tau protein kinase II 23 kDa subunit) (p23)]	CDK5R1 CDK5R NCK5A	Homo sapiens (Human)	307
P30203	CD6_HUMAN	reviewed	T-cell differentiation antigen CD6 (T12) (TP120) (CD antigen CD6) [Cleaved into: Soluble CD6]	CD6	Homo sapiens (Human)	668
P13688	CEAM1_HUMAN	reviewed	Carcinoembryonic antigen-related cell adhesion molecule 1 (Biliary glycoprotein 1) (BGP-1) (CD antigen CD66a)	CEACAM1 BGP BGP1	Homo sapiens (Human)	526
P13569	CFTR_HUMAN	reviewed	Cystic fibrosis transmembrane conductance regulator (CFTR) (ATP-binding cassette sub-family C member 7) (Channel conductance-controlling ATPase) (EC 3.6.3.49) (cAMP-dependent chloride channel)	CFTR ABCC7	Homo sapiens (Human)	1480
P22681	CBL_HUMAN	reviewed	E3 ubiquitin-protein ligase CBL (EC 6.3.2.-) (Casitas B-lineage lymphoma proto-oncogene) (Proto-oncogene c-Cbl) (RING finger protein 55) (Signal transduction protein CBL)	CBL CBL2 RNF55	Homo sapiens (Human)	906
Q8ND76	CCNY_HUMAN	reviewed	Cyclin-Y (Cyc-Y) (Cyclin box protein 1) (Cyclin fold protein 1) (cyclin-X)	CCNY C10orf9 CBCP1 CFP1	Homo sapiens (Human)	341
P51685	CCR8_HUMAN	reviewed	C-C chemokine receptor type 8 (C-C CKR-8) (CC-CKR-8) (CCR-8) (CC chemokine receptor CHEMR1) (CMKBRL2) (Chemokine receptor-like 1) (CKR-L1) (GPR-CY6) (GPRCY6) (TER1) (CD antigen CDw198)	CCR8 CKRL1 CMKBR8 CMKBRL2	Homo sapiens (Human)	355
P32248	CCR7_HUMAN	reviewed	C-C chemokine receptor type 7 (C-C CKR-7) (CC-CKR-7) (CCR-7) (BLR2) (CDw197) (Epstein-Barr virus-induced G-protein coupled receptor 1) (EBI1) (EBV-induced G-protein coupled receptor 1) (MIP-3 beta receptor) (CD antigen CD197)	CCR7 CMKBR7 EBI1 EVI1	Homo sapiens (Human)	378
Q6YHK3	CD109_HUMAN	reviewed	CD109 antigen (150 kDa TGF-beta-1-binding protein) (C3 and PZP-like alpha-2-macroglobulin domain-containing protein 7) (Platelet-specific Gov antigen) (p180) (r150) (CD antigen CD109)	CD109 CPAMD7	Homo sapiens (Human)	1445
P29016	CD1B_HUMAN	reviewed	T-cell surface glycoprotein CD1b (CD antigen CD1b)	CD1B	Homo sapiens (Human)	333
P07766	CD3E_HUMAN	reviewed	T-cell surface glycoprotein CD3 epsilon chain (T-cell surface antigen T3/Leu-4 epsilon chain) (CD antigen CD3e)	CD3E T3E	Homo sapiens (Human)	207
Q08722	CD47_HUMAN	reviewed	Leukocyte surface antigen CD47 (Antigenic surface determinant protein OA3) (Integrin-associated protein) (IAP) (Protein MER6) (CD antigen CD47)	CD47 MER6	Homo sapiens (Human)	323
P19397	CD53_HUMAN	reviewed	Leukocyte surface antigen CD53 (Cell surface glycoprotein CD53) (Tetraspanin-25) (Tspan-25) (CD antigen CD53)	CD53 MOX44 TSPAN25	Homo sapiens (Human)	219
Q6ZTQ4	CDHR3_HUMAN	reviewed	Cadherin-related family member 3 (Cadherin-like protein 28)	CDHR3 CDH28	Homo sapiens (Human)	885
O94921	CDK14_HUMAN	reviewed	Cyclin-dependent kinase 14 (EC 2.7.11.22) (Cell division protein kinase 14) (Serine/threonine-protein kinase PFTAIRE-1) (hPFTAIRE1)	CDK14 KIAA0834 PFTK1	Homo sapiens (Human)	469
P51679	CCR4_HUMAN	reviewed	C-C chemokine receptor type 4 (C-C CKR-4) (CC-CKR-4) (CCR-4) (CCR4) (K5-5) (CD antigen CD194)	CCR4 CMKBR4	Homo sapiens (Human)	360
P11912	CD79A_HUMAN	reviewed	B-cell antigen receptor complex-associated protein alpha chain (Ig-alpha) (MB-1 membrane glycoprotein) (Membrane-bound immunoglobulin-associated protein) (Surface IgM-associated protein) (CD antigen CD79a)	CD79A IGA MB1	Homo sapiens (Human)	226
O14735	CDIPT_HUMAN	reviewed	CDP-diacylglycerol--inositol 3-phosphatidyltransferase (EC 2.7.8.11) (Phosphatidylinositol synthase) (PI synthase) (PtdIns synthase)	CDIPT PIS PIS1	Homo sapiens (Human)	213
Q00536	CDK16_HUMAN	reviewed	Cyclin-dependent kinase 16 (EC 2.7.11.22) (Cell division protein kinase 16) (PCTAIRE-motif protein kinase 1) (Serine/threonine-protein kinase PCTAIRE-1)	CDK16 PCTAIRE1 PCTK1	Homo sapiens (Human)	496
P40199	CEAM6_HUMAN	reviewed	Carcinoembryonic antigen-related cell adhesion molecule 6 (Non-specific crossreacting antigen) (Normal cross-reacting antigen) (CD antigen CD66c)	CEACAM6 NCA	Homo sapiens (Human)	344
Q9NYQ6	CELR1_HUMAN	reviewed	Cadherin EGF LAG seven-pass G-type receptor 1 (Cadherin family member 9) (Flamingo homolog 2) (hFmi2)	CELSR1 CDHF9 FMI2	Homo sapiens (Human)	3014
O75838	CIB2_HUMAN	reviewed	Calcium and integrin-binding family member 2 (Kinase-interacting protein 2) (KIP 2)	CIB2 KIP2	Homo sapiens (Human)	187
Q13740	CD166_HUMAN	reviewed	CD166 antigen (Activated leukocyte cell adhesion molecule) (CD antigen CD166)	ALCAM MEMD	Homo sapiens (Human)	583
Q99467	CD180_HUMAN	reviewed	CD180 antigen (Lymphocyte antigen 64) (Radioprotective 105 kDa protein) (CD antigen CD180)	CD180 LY64 RP105	Homo sapiens (Human)	661
P11836	CD20_HUMAN	reviewed	B-lymphocyte antigen CD20 (B-lymphocyte surface antigen B1) (Bp35) (Leukocyte surface antigen Leu-16) (Membrane-spanning 4-domains subfamily A member 1) (CD antigen CD20)	MS4A1 CD20	Homo sapiens (Human)	297
P20138	CD33_HUMAN	reviewed	Myeloid cell surface antigen CD33 (Sialic acid-binding Ig-like lectin 3) (Siglec-3) (gp67) (CD antigen CD33)	CD33 SIGLEC3	Homo sapiens (Human)	364
P01730	CD4_HUMAN	reviewed	T-cell surface glycoprotein CD4 (T-cell surface antigen T4/Leu-3) (CD antigen CD4)	CD4	Homo sapiens (Human)	458
Q9HCU4	CELR2_HUMAN	reviewed	Cadherin EGF LAG seven-pass G-type receptor 2 (Cadherin family member 10) (Epidermal growth factor-like protein 2) (EGF-like protein 2) (Flamingo homolog 3) (Multiple epidermal growth factor-like domains protein 3) (Multiple EGF-like domains protein 3)	CELSR2 CDHF10 EGFL2 KIAA0279 MEGF3	Homo sapiens (Human)	2923
Q9UKJ5	CHIC2_HUMAN	reviewed	Cysteine-rich hydrophobic domain-containing protein 2 (BrX-like translocated in leukemia)	CHIC2 BTL	Homo sapiens (Human)	165
Q99828	CIB1_HUMAN	reviewed	Calcium and integrin-binding protein 1 (CIB) (Calcium- and integrin-binding protein) (CIBP) (Calmyrin) (DNA-PKcs-interacting protein) (Kinase-interacting protein) (KIP) (SNK-interacting protein 2-28) (SIP2-28)	CIB1 CIB KIP PRKDCIP	Homo sapiens (Human)	191
Q5QGZ9	CL12A_HUMAN	reviewed	C-type lectin domain family 12 member A (C-type lectin-like molecule 1) (CLL-1) (Dendritic cell-associated lectin 2) (DCAL-2) (Myeloid inhibitory C-type lectin-like receptor) (MICL)	CLEC12A CLL1 DCAL2 MICL	Homo sapiens (Human)	265
P09326	CD48_HUMAN	reviewed	CD48 antigen (B-lymphocyte activation marker BLAST-1) (BCM1 surface antigen) (Leukocyte antigen MEM-102) (SLAM family member 2) (SLAMF2) (Signaling lymphocytic activation molecule 2) (TCT.1) (CD antigen CD48)	CD48 BCM1 BLAST1	Homo sapiens (Human)	243
P13987	CD59_HUMAN	reviewed	CD59 glycoprotein (1F5 antigen) (20 kDa homologous restriction factor) (HRF-20) (HRF20) (MAC-inhibitory protein) (MAC-IP) (MEM43 antigen) (Membrane attack complex inhibition factor) (MACIF) (Membrane inhibitor of reactive lysis) (MIRL) (Protectin) (CD antigen CD59)	CD59 MIC11 MIN1 MIN2 MIN3 MSK21	Homo sapiens (Human)	128
P42081	CD86_HUMAN	reviewed	T-lymphocyte activation antigen CD86 (Activation B7-2 antigen) (B70) (BU63) (CTLA-4 counter-receptor B7.2) (FUN-1) (CD antigen CD86)	CD86 CD28LG2	Homo sapiens (Human)	329
P48960	CD97_HUMAN	reviewed	CD97 antigen (Leukocyte antigen CD97) (CD antigen CD97) [Cleaved into: CD97 antigen subunit alpha; CD97 antigen subunit beta]	CD97	Homo sapiens (Human)	835
Q15642	CIP4_HUMAN	reviewed	Cdc42-interacting protein 4 (Protein Felic) (Salt tolerant protein) (hSTP) (Thyroid receptor-interacting protein 10) (TR-interacting protein 10) (TRIP-10)	TRIP10 CIP4 STOT STP	Homo sapiens (Human)	601
O75122	CLAP2_HUMAN	reviewed	CLIP-associating protein 2 (Cytoplasmic linker-associated protein 2) (Protein Orbit homolog 2) (hOrbit2)	CLASP2 KIAA0627	Homo sapiens (Human)	1294
Q14CN2	CLCA4_HUMAN	reviewed	Calcium-activated chloride channel regulator 4 (EC 3.4.-.-) (Calcium-activated chloride channel family member 4) (hCLCA4) (Calcium-activated chloride channel protein 2) (CaCC-2) (hCaCC-2) (Chloride channel accessory 4) [Cleaved into: Calcium-activated chloride channel regulator 4, 110 kDa form; Calcium-activated chloride channel regulator 4, 30 kDa form]	CLCA4 CaCC2 UNQ562/PRO1124	Homo sapiens (Human)	919
P56750	CLD17_HUMAN	reviewed	Claudin-17	CLDN17 UNQ758/PRO1489	Homo sapiens (Human)	224
P56880	CLD20_HUMAN	reviewed	Claudin-20	CLDN20	Homo sapiens (Human)	219
C9JDP6	CLD25_HUMAN	reviewed	Putative claudin-25	CLDN25	Homo sapiens (Human)	229
O14493	CLD4_HUMAN	reviewed	Claudin-4 (Clostridium perfringens enterotoxin receptor) (CPE-R) (CPE-receptor) (Williams-Beuren syndrome chromosomal region 8 protein)	CLDN4 CPER CPETR1 WBSCR8	Homo sapiens (Human)	209
O00501	CLD5_HUMAN	reviewed	Claudin-5 (Transmembrane protein deleted in VCFS) (TMDVCF)	CLDN5 AWAL TMVCF	Homo sapiens (Human)	218
P56748	CLD8_HUMAN	reviewed	Claudin-8	CLDN8 UNQ779/PRO1573	Homo sapiens (Human)	225
Q96DZ5	CLIP3_HUMAN	reviewed	CAP-Gly domain-containing linker protein 3 (Cytoplasmic linker protein 170-related 59 kDa protein) (CLIP-170-related 59 kDa protein) (CLIPR-59)	CLIP3 CLIPR59	Homo sapiens (Human)	547
Q08708	CLM6_HUMAN	reviewed	CMRF35-like molecule 6 (CLM-6) (CD300 antigen-like family member C) (CMRF35-A1) (CMRF-35) (Immunoglobulin superfamily member 16) (IgSF16) (CD antigen CD300c)	CD300C CMRF35 CMRF35A CMRF35A1 IGSF16	Homo sapiens (Human)	224
P06731	CEAM5_HUMAN	reviewed	Carcinoembryonic antigen-related cell adhesion molecule 5 (Carcinoembryonic antigen) (CEA) (Meconium antigen 100) (CD antigen CD66e)	CEACAM5 CEA	Homo sapiens (Human)	702
Q9NYQ7	CELR3_HUMAN	reviewed	Cadherin EGF LAG seven-pass G-type receptor 3 (Cadherin family member 11) (Epidermal growth factor-like protein 1) (EGF-like protein 1) (Flamingo homolog 1) (hFmi1) (Multiple epidermal growth factor-like domains protein 2) (Multiple EGF-like domains protein 2)	CELSR3 CDHF11 EGFL1 FMI1 KIAA0812 MEGF2	Homo sapiens (Human)	3312
Q99653	CHP1_HUMAN	reviewed	Calcineurin B homologous protein 1 (Calcineurin B-like protein) (Calcium-binding protein CHP) (Calcium-binding protein p22) (EF-hand calcium-binding domain-containing protein p22)	CHP1 CHP	Homo sapiens (Human)	195
Q8IZS7	CLCL1_HUMAN	reviewed	C-type lectin-like domain family 1 (Dendritic cell-associated lectin 1) (DC-associated lectin-1) (DCAL-1)	CLECL1 DCAL1	Homo sapiens (Human)	167
O75508	CLD11_HUMAN	reviewed	Claudin-11 (Oligodendrocyte-specific protein)	CLDN11 OSP OTM	Homo sapiens (Human)	207
P56749	CLD12_HUMAN	reviewed	Claudin-12	CLDN12	Homo sapiens (Human)	244
O95832	CLD1_HUMAN	reviewed	Claudin-1 (Senescence-associated epithelial membrane protein)	CLDN1 CLD1 SEMP1 UNQ481/PRO944	Homo sapiens (Human)	211
A6NM45	CLD24_HUMAN	reviewed	Putative claudin-24	CLDN24	Homo sapiens (Human)	220
H7C241	CLD34_HUMAN	reviewed	Claudin-34	CLDN34	Homo sapiens (Human)	214
Q496F6	CLM2_HUMAN	reviewed	CMRF35-like molecule 2 (CLM-2) (CD300 antigen-like family member E) (CMRF35-A5) (Immune receptor expressed on myeloid cells 2) (IREM-2) (Polymeric immunoglobulin receptor 2) (PIgR-2) (PIgR2) (Poly-Ig receptor 2) (CD antigen CD300e)	CD300E CD300LE CLM2 CMRF35A5 IREM2	Homo sapiens (Human)	205
Q6UXG3	CLM9_HUMAN	reviewed	CMRF35-like molecule 9 (CLM-9) (CD300 antigen-like family member G) (Triggering receptor expressed on myeloid cells 4) (TREM-4) (CD antigen CD300g)	CD300LG CLM9 TREM4 UNQ422/PRO846	Homo sapiens (Human)	332
Q8WUJ3	CEMIP_HUMAN	reviewed	Cell migration-inducing and hyaluronan-binding protein (EC 3.2.1.35)	CEMIP KIAA1199	Homo sapiens (Human)	1361
P0CG37	CFC1_HUMAN	reviewed	Cryptic protein (Cryptic family protein 1)	CFC1	Homo sapiens (Human)	223
Q96BS2	CHP3_HUMAN	reviewed	Calcineurin B homologous protein 3 (Tescalcin) (TSC)	TESC CHP3	Homo sapiens (Human)	214
Q6UXB4	CLC4G_HUMAN	reviewed	C-type lectin domain family 4 member G (Liver and lymph node sinusoidal endothelial cell C-type lectin) (LSECtin)	CLEC4G UNQ431/PRO792	Homo sapiens (Human)	293
Q9BXN2	CLC7A_HUMAN	reviewed	C-type lectin domain family 7 member A (Beta-glucan receptor) (C-type lectin superfamily member 12) (Dendritic cell-associated C-type lectin 1) (DC-associated C-type lectin 1) (Dectin-1)	CLEC7A BGR CLECSF12 DECTIN1 UNQ539/PRO1082	Homo sapiens (Human)	247
Q9UQC9	CLCA2_HUMAN	reviewed	Calcium-activated chloride channel regulator 2 (EC 3.4.-.-) (Calcium-activated chloride channel family member 2) (hCLCA2) (Calcium-activated chloride channel protein 3) (CaCC-3) (hCaCC-3) [Cleaved into: Calcium-activated chloride channel regulator 2, 109 kDa form; Calcium-activated chloride channel regulator 2, 35 kDa form]	CLCA2 CACC3	Homo sapiens (Human)	943
Q99788	CML1_HUMAN	reviewed	Chemokine-like receptor 1 (G-protein coupled receptor ChemR23) (G-protein coupled receptor DEZ)	CMKLR1 CHEMR23 DEZ	Homo sapiens (Human)	373
Q5VXU3	CHIC1_HUMAN	reviewed	Cysteine-rich hydrophobic domain-containing protein 1 (Brain X-linked protein)	CHIC1 BRX	Homo sapiens (Human)	224
Q6UVW9	CLC2A_HUMAN	reviewed	C-type lectin domain family 2 member A (Keratinocyte-associated C-type lectin) (KACL) (Proliferation-induced lymphocyte-associated receptor) (PILAR)	CLEC2A KACL UNQ5792/PRO19597	Homo sapiens (Human)	174
P51795	CLCN5_HUMAN	reviewed	H(+)/Cl(-) exchange transporter 5 (Chloride channel protein 5) (ClC-5) (Chloride transporter ClC-5)	CLCN5 CLCK2	Homo sapiens (Human)	746
Q8N6F1	CLD19_HUMAN	reviewed	Claudin-19	CLDN19	Homo sapiens (Human)	224
O15551	CLD3_HUMAN	reviewed	Claudin-3 (Clostridium perfringens enterotoxin receptor 2) (CPE-R 2) (CPE-receptor 2) (Rat ventral prostate.1 protein homolog) (hRVP1)	CLDN3 C7orf1 CPETR2	Homo sapiens (Human)	220
Q9Y696	CLIC4_HUMAN	reviewed	Chloride intracellular channel protein 4 (Intracellular chloride ion channel protein p64H1)	CLIC4	Homo sapiens (Human)	253
Q9H6B4	CLMP_HUMAN	reviewed	CXADR-like membrane protein (Adipocyte adhesion molecule) (Coxsackie- and adenovirus receptor-like membrane protein) (CAR-like membrane protein)	CLMP ACAM ASAM UNQ318/PRO363	Homo sapiens (Human)	373
Q9NS75	CLTR2_HUMAN	reviewed	Cysteinyl leukotriene receptor 2 (CysLTR2) (G-protein coupled receptor GPCR21) (hGPCR21) (G-protein coupled receptor HG57) (HPN321)	CYSLTR2 CYSLT2 CYSLT2R PSEC0146	Homo sapiens (Human)	346
P26992	CNTFR_HUMAN	reviewed	Ciliary neurotrophic factor receptor subunit alpha (CNTF receptor subunit alpha) (CNTFR-alpha)	CNTFR	Homo sapiens (Human)	372
Q02246	CNTN2_HUMAN	reviewed	Contactin-2 (Axonal glycoprotein TAG-1) (Axonin-1) (Transient axonal glycoprotein 1) (TAX-1)	CNTN2 AXT TAG1 TAX1	Homo sapiens (Human)	1040
O43745	CHP2_HUMAN	reviewed	Calcineurin B homologous protein 2 (Hepatocellular carcinoma-associated antigen 520)	CHP2 HCA520	Homo sapiens (Human)	196
Q96F05	CK024_HUMAN	reviewed	Uncharacterized protein C11orf24 (Protein DM4E3)	C11orf24 FP2568 UNQ1872/PRO4315	Homo sapiens (Human)	449
P57739	CLD2_HUMAN	reviewed	Claudin-2 (SP82)	CLDN2 PSEC0059 SP82 UNQ705/PRO1356	Homo sapiens (Human)	230
O95484	CLD9_HUMAN	reviewed	Claudin-9	CLDN9	Homo sapiens (Human)	217
A8K4G0	CLM7_HUMAN	reviewed	CMRF35-like molecule 7 (CLM-7) (CD300 antigen-like family member B) (CMRF35-A2) (Immune receptor expressed on myeloid cells 3) (IREM-3) (Leukocyte mono-Ig-like receptor 5) (Triggering receptor expressed on myeloid cells 5) (TREM-5) (CD antigen CD300b)	CD300LB CD300B CLM7 CMRF35A2 IREM3 LMIR5 TREM5 UNQ2530/PRO6029	Homo sapiens (Human)	201
Q9UGN4	CLM8_HUMAN	reviewed	CMRF35-like molecule 8 (CLM-8) (CD300 antigen-like family member A) (CMRF-35-H9) (CMRF35-H9) (CMRF35-H) (IRC1/IRC2) (Immunoglobulin superfamily member 12) (IgSF12) (Inhibitory receptor protein 60) (IRp60) (NK inhibitory receptor) (CD antigen CD300a)	CD300A CMRF35H IGSF12 HSPC083	Homo sapiens (Human)	299
Q9NRU3	CNNM1_HUMAN	reviewed	Metal transporter CNNM1 (Ancient conserved domain-containing protein 1) (Cyclin-M1)	CNNM1 ACDP1	Homo sapiens (Human)	951
Q8NE01	CNNM3_HUMAN	reviewed	Metal transporter CNNM3 (Ancient conserved domain-containing protein 3) (Cyclin-M3)	CNNM3 ACDP3	Homo sapiens (Human)	707
Q12860	CNTN1_HUMAN	reviewed	Contactin-1 (Glycoprotein gp135) (Neural cell surface protein F3)	CNTN1	Homo sapiens (Human)	1018
Q9P232	CNTN3_HUMAN	reviewed	Contactin-3 (Brain-derived immunoglobulin superfamily protein 1) (BIG-1) (Plasmacytoma-associated neuronal glycoprotein)	CNTN3 KIAA1496 PANG	Homo sapiens (Human)	1028
Q8IWV2	CNTN4_HUMAN	reviewed	Contactin-4 (Brain-derived immunoglobulin superfamily protein 2) (BIG-2)	CNTN4	Homo sapiens (Human)	1026
Q9C0A0	CNTP4_HUMAN	reviewed	Contactin-associated protein-like 4 (Cell recognition molecule Caspr4)	CNTNAP4 CASPR4 KIAA1763	Homo sapiens (Human)	1308
P07357	CO8A_HUMAN	reviewed	Complement component C8 alpha chain (Complement component 8 subunit alpha)	C8A	Homo sapiens (Human)	584
Q7Z7J9	CK2N1_HUMAN	reviewed	Calcium/calmodulin-dependent protein kinase II inhibitor 1 (CaMKII inhibitory protein alpha) (CaMKIIN-alpha)	CAMK2N1	Homo sapiens (Human)	78
Q07065	CKAP4_HUMAN	reviewed	Cytoskeleton-associated protein 4 (63-kDa cytoskeleton-linking membrane protein) (Climp-63) (p63)	CKAP4	Homo sapiens (Human)	602
Q2HXU8	CL12B_HUMAN	reviewed	C-type lectin domain family 12 member B (Macrophage antigen H)	CLEC12B UNQ5782/PRO16089	Homo sapiens (Human)	276
Q9NY25	CLC5A_HUMAN	reviewed	C-type lectin domain family 5 member A (C-type lectin superfamily member 5) (Myeloid DAP12-associating lectin 1) (MDL-1)	CLEC5A CLECSF5 MDL1	Homo sapiens (Human)	188
P51801	CLCKB_HUMAN	reviewed	Chloride channel protein ClC-Kb (Chloride channel Kb) (ClC-K2)	CLCNKB	Homo sapiens (Human)	687
O95500	CLD14_HUMAN	reviewed	Claudin-14	CLDN14 UNQ777/PRO1571	Homo sapiens (Human)	239
P56856	CLD18_HUMAN	reviewed	Claudin-18	CLDN18 UNQ778/PRO1572	Homo sapiens (Human)	261
Q96B33	CLD23_HUMAN	reviewed	Claudin-23	CLDN23	Homo sapiens (Human)	292
O00299	CLIC1_HUMAN	reviewed	Chloride intracellular channel protein 1 (Chloride channel ABP) (Nuclear chloride ion channel 27) (NCC27) (Regulatory nuclear chloride ion channel protein) (hRNCC)	CLIC1 G6 NCC27	Homo sapiens (Human)	241
Q8TDQ1	CLM1_HUMAN	reviewed	CMRF35-like molecule 1 (CLM-1) (CD300 antigen-like family member F) (Immune receptor expressed on myeloid cells 1) (IREM-1) (Immunoglobulin superfamily member 13) (IgSF13) (NK inhibitory receptor) (CD antigen CD300f)	CD300LF CD300F CLM1 IGSF13 IREM1 NKIR UNQ3105/PRO10111	Homo sapiens (Human)	290
P21964	COMT_HUMAN	reviewed	Catechol O-methyltransferase (EC 2.1.1.6)	COMT	Homo sapiens (Human)	271
P78369	CLD10_HUMAN	reviewed	Claudin-10 (OSP-like protein)	CLDN10	Homo sapiens (Human)	228
P56746	CLD15_HUMAN	reviewed	Claudin-15	CLDN15	Homo sapiens (Human)	228
Q9Y5I7	CLD16_HUMAN	reviewed	Claudin-16 (Paracellin-1) (PCLN-1)	CLDN16 PCLN1	Homo sapiens (Human)	305
Q8N7P3	CLD22_HUMAN	reviewed	Claudin-22	CLDN22	Homo sapiens (Human)	220
P56747	CLD6_HUMAN	reviewed	Claudin-6 (Skullin)	CLDN6 UNQ757/PRO1488	Homo sapiens (Human)	220
Q96NY7	CLIC6_HUMAN	reviewed	Chloride intracellular channel protein 6 (Parchorin)	CLIC6 CLIC1L	Homo sapiens (Human)	704
Q6UXZ3	CLM4_HUMAN	reviewed	CMRF35-like molecule 4 (CLM-4) (CD300 antigen-like family member D) (CMRF35-A4) (CD antigen CD300d)	CD300LD CD300D CMRF35A4 UNQ9218/PRO28686	Homo sapiens (Human)	194
P58418	CLRN1_HUMAN	reviewed	Clarin-1 (Usher syndrome type-3 protein)	CLRN1 USH3A	Homo sapiens (Human)	232
Q6PI25	CNIH2_HUMAN	reviewed	Protein cornichon homolog 2 (CNIH-2) (Cornichon family AMPA receptor auxiliary protein 2) (Cornichon-like protein)	CNIH2 CNIL	Homo sapiens (Human)	160
Q8TBE1	CNIH3_HUMAN	reviewed	Protein cornichon homolog 3 (CNIH-3) (Cornichon family AMPA receptor auxiliary protein 3)	CNIH3	Homo sapiens (Human)	160
Q6P4Q7	CNNM4_HUMAN	reviewed	Metal transporter CNNM4 (Ancient conserved domain-containing protein 4) (Cyclin-M4)	CNNM4 ACDP4 KIAA1592	Homo sapiens (Human)	775
Q9UQ52	CNTN6_HUMAN	reviewed	Contactin-6 (Neural recognition molecule NB-3) (hNB-3)	CNTN6	Homo sapiens (Human)	1028
P53618	COPB_HUMAN	reviewed	Coatomer subunit beta (Beta-coat protein) (Beta-COP)	COPB1 COPB MSTP026	Homo sapiens (Human)	953
Q9UHP7	CLC2D_HUMAN	reviewed	C-type lectin domain family 2 member D (Lectin-like NK cell receptor) (Lectin-like transcript 1) (LLT-1) (Osteoclast inhibitory lectin)	CLEC2D CLAX LLT1 OCIL	Homo sapiens (Human)	191
Q9H2X3	CLC4M_HUMAN	reviewed	C-type lectin domain family 4 member M (CD209 antigen-like protein 1) (DC-SIGN-related protein) (DC-SIGNR) (Dendritic cell-specific ICAM-3-grabbing non-integrin 2) (DC-SIGN2) (Liver/lymph node-specific ICAM-3-grabbing non-integrin) (L-SIGN) (CD antigen CD299)	CLEC4M CD209L CD209L1 CD299	Homo sapiens (Human)	399
A8K7I4	CLCA1_HUMAN	reviewed	Calcium-activated chloride channel regulator 1 (EC 3.4.-.-) (Calcium-activated chloride channel family member 1) (hCLCA1) (Calcium-activated chloride channel protein 1) (CaCC-1) (hCaCC-1)	CLCA1 CACC1	Homo sapiens (Human)	914
P35523	CLCN1_HUMAN	reviewed	Chloride channel protein 1 (ClC-1) (Chloride channel protein, skeletal muscle)	CLCN1 CLC1	Homo sapiens (Human)	988
P51788	CLCN2_HUMAN	reviewed	Chloride channel protein 2 (ClC-2)	CLCN2	Homo sapiens (Human)	898
O95471	CLD7_HUMAN	reviewed	Claudin-7 (CLDN-7)	CLDN7 CEPTRL2 CPETRL2	Homo sapiens (Human)	211
Q9Y271	CLTR1_HUMAN	reviewed	Cysteinyl leukotriene receptor 1 (CysLTR1) (Cysteinyl leukotriene D4 receptor) (LTD4 receptor) (G-protein coupled receptor HG55) (HMTMF81)	CYSLTR1 CYSLT1	Homo sapiens (Human)	337
Q9ULV4	COR1C_HUMAN	reviewed	Coronin-1C (Coronin-3) (hCRNN4)	CORO1C CRN2 CRNN4	Homo sapiens (Human)	474
P34972	CNR2_HUMAN	reviewed	Cannabinoid receptor 2 (CB-2) (CB2) (hCB2) (CX5)	CNR2 CB2A CB2B	Homo sapiens (Human)	360
Q6PJW8	CNST_HUMAN	reviewed	Consortin	CNST C1orf71	Homo sapiens (Human)	725
Q9BZ76	CNTP3_HUMAN	reviewed	Contactin-associated protein-like 3 (Cell recognition molecule Caspr3)	CNTNAP3 CASPR3 KIAA1714	Homo sapiens (Human)	1288
O75128	COBL_HUMAN	reviewed	Protein cordon-bleu	COBL KIAA0633	Homo sapiens (Human)	1261
Q5TAT6	CODA1_HUMAN	reviewed	Collagen alpha-1(XIII) chain (COLXIIIA1)	COL13A1	Homo sapiens (Human)	717
O15431	COPT1_HUMAN	reviewed	High affinity copper uptake protein 1 (Copper transporter 1) (hCTR1) (Solute carrier family 31 member 1)	SLC31A1 COPT1 CTR1	Homo sapiens (Human)	190
Q8TAV3	CP2W1_HUMAN	reviewed	Cytochrome P450 2W1 (EC 1.14.14.-) (CYPIIW1)	CYP2W1	Homo sapiens (Human)	490
Q9H8M5	CNNM2_HUMAN	reviewed	Metal transporter CNNM2 (Ancient conserved domain-containing protein 2) (Cyclin-M2)	CNNM2 ACDP2	Homo sapiens (Human)	875
P21554	CNR1_HUMAN	reviewed	Cannabinoid receptor 1 (CB-R) (CB1) (CANN6)	CNR1 CNR	Homo sapiens (Human)	472
Q9HC73	CRLF2_HUMAN	reviewed	Cytokine receptor-like factor 2 (Cytokine receptor-like 2) (IL-XR) (Thymic stromal lymphopoietin protein receptor) (TSLP receptor)	CRLF2 CRL2 ILXR TSLPR	Homo sapiens (Human)	371
O94779	CNTN5_HUMAN	reviewed	Contactin-5 (Neural recognition molecule NB-2) (hNB-2)	CNTN5	Homo sapiens (Human)	1100
P02748	CO9_HUMAN	reviewed	Complement component C9 [Cleaved into: Complement component C9a; Complement component C9b]	C9	Homo sapiens (Human)	559
Q86Y22	CONA1_HUMAN	reviewed	Collagen alpha-1(XXIII) chain	COL23A1	Homo sapiens (Human)	540
Q9BZB8	CPEB1_HUMAN	reviewed	Cytoplasmic polyadenylation element-binding protein 1 (CPE-BP1) (CPE-binding protein 1) (h-CPEB) (hCPEB-1)	CPEB1 CPEB	Homo sapiens (Human)	566
P04632	CPNS1_HUMAN	reviewed	Calpain small subunit 1 (CSS1) (Calcium-activated neutral proteinase small subunit) (CANP small subunit) (Calcium-dependent protease small subunit) (CDPS) (Calcium-dependent protease small subunit 1) (Calpain regulatory subunit)	CAPNS1 CAPN4 CAPNS	Homo sapiens (Human)	268
Q5TA50	CPTP_HUMAN	reviewed	Ceramide-1-phosphate transfer protein (CPTP) (Glycolipid transfer protein domain-containing protein 1) (GLTP domain-containing protein 1)	CPTP GLTPD1	Homo sapiens (Human)	214
P09603	CSF1_HUMAN	reviewed	Macrophage colony-stimulating factor 1 (CSF-1) (M-CSF) (MCSF) (Lanimostim) [Cleaved into: Processed macrophage colony-stimulating factor 1]	CSF1	Homo sapiens (Human)	554
Q96D31	CRCM1_HUMAN	reviewed	Calcium release-activated calcium channel protein 1 (Protein orai-1) (Transmembrane protein 142A)	ORAI1 CRACM1 TMEM142A	Homo sapiens (Human)	301
Q13324	CRFR2_HUMAN	reviewed	Corticotropin-releasing factor receptor 2 (CRF-R-2) (CRF-R2) (CRFR-2) (Corticotropin-releasing hormone receptor 2) (CRH-R-2) (CRH-R2)	CRHR2 CRF2R CRH2R	Homo sapiens (Human)	411
Q5IJ48	CRUM2_HUMAN	reviewed	Protein crumbs homolog 2 (Crumbs-like protein 2)	CRB2	Homo sapiens (Human)	1285
P41240	CSK_HUMAN	reviewed	Tyrosine-protein kinase CSK (EC 2.7.10.2) (C-Src kinase) (Protein-tyrosine kinase CYL)	CSK	Homo sapiens (Human)	450
P23528	COF1_HUMAN	reviewed	Cofilin-1 (18 kDa phosphoprotein) (p18) (Cofilin, non-muscle isoform)	CFL1 CFL	Homo sapiens (Human)	166
Q9Y5Q5	CORIN_HUMAN	reviewed	Atrial natriuretic peptide-converting enzyme (EC 3.4.21.-) (Corin) (Heart-specific serine proteinase ATC2) (Pro-ANP-converting enzyme) (Transmembrane protease serine 10) [Cleaved into: Atrial natriuretic peptide-converting enzyme, N-terminal propeptide; Atrial natriuretic peptide-converting enzyme, activated protease fragment; Atrial natriuretic peptide-converting enzyme, 180 kDa soluble fragment…	CORIN CRN TMPRSS10	Homo sapiens (Human)	1042
O75131	CPNE3_HUMAN	reviewed	Copine-3 (Copine III)	CPNE3 CPN3 KIAA0636	Homo sapiens (Human)	537
P34998	CRFR1_HUMAN	reviewed	Corticotropin-releasing factor receptor 1 (CRF-R-1) (CRF-R1) (CRFR-1) (Corticotropin-releasing hormone receptor 1) (CRH-R-1) (CRH-R1)	CRHR1 CRFR CRFR1 CRHR	Homo sapiens (Human)	444
O95196	CSPG5_HUMAN	reviewed	Chondroitin sulfate proteoglycan 5 (Acidic leucine-rich EGF-like domain-containing brain protein) (Neuroglycan C)	CSPG5 CALEB NGC	Homo sapiens (Human)	566
P30825	CTR1_HUMAN	reviewed	High affinity cationic amino acid transporter 1 (CAT-1) (CAT1) (Ecotropic retroviral leukemia receptor homolog) (Ecotropic retrovirus receptor homolog) (ERR) (Solute carrier family 7 member 1) (System Y+ basic amino acid transporter)	SLC7A1 ATRC1 ERR REC1L	Homo sapiens (Human)	629
Q86XQ3	CTSR3_HUMAN	reviewed	Cation channel sperm-associated protein 3 (CatSper3) (Ca(v)-like protein) (One-repeat calcium channel-like protein)	CATSPER3	Homo sapiens (Human)	398
Q7RTX7	CTSR4_HUMAN	reviewed	Cation channel sperm-associated protein 4 (CatSper4)	CATSPER4	Homo sapiens (Human)	472
Q9BUF7	CRUM3_HUMAN	reviewed	Protein crumbs homolog 3	CRB3 UNQ588/PRO1158	Homo sapiens (Human)	120
Q7Z408	CSMD2_HUMAN	reviewed	CUB and sushi domain-containing protein 2 (CUB and sushi multiple domains protein 2)	CSMD2 KIAA1884	Homo sapiens (Human)	3487
Q7Z407	CSMD3_HUMAN	reviewed	CUB and sushi domain-containing protein 3 (CUB and sushi multiple domains protein 3)	CSMD3 KIAA1894	Homo sapiens (Human)	3707
O94985	CSTN1_HUMAN	reviewed	Calsyntenin-1 (Alcadein-alpha) (Alc-alpha) (Alzheimer-related cadherin-like protein) (Non-classical cadherin XB31alpha) [Cleaved into: Soluble Alc-alpha (SAlc-alpha); CTF1-alpha (C-terminal fragment 1-alpha)]	CLSTN1 CS1 KIAA0911	Homo sapiens (Human)	981
P49238	CX3C1_HUMAN	reviewed	CX3C chemokine receptor 1 (C-X3-C CKR-1) (CX3CR1) (Beta chemokine receptor-like 1) (CMK-BRL-1) (CMK-BRL1) (Fractalkine receptor) (G-protein coupled receptor 13) (V28)	CX3CR1 CMKBRL1 GPR13	Homo sapiens (Human)	355
Q969M2	CXA10_HUMAN	reviewed	Gap junction alpha-10 protein (Connexin-62) (Cx62)	GJA10 CX62	Homo sapiens (Human)	543
P17302	CXA1_HUMAN	reviewed	Gap junction alpha-1 protein (Connexin-43) (Cx43) (Gap junction 43 kDa heart protein)	GJA1 GJAL	Homo sapiens (Human)	382
Q8IZJ3	CPMD8_HUMAN	reviewed	C3 and PZP-like alpha-2-macroglobulin domain-containing protein 8	CPAMD8 KIAA1283	Homo sapiens (Human)	1885
Q96FN4	CPNE2_HUMAN	reviewed	Copine-2 (Copine II)	CPNE2	Homo sapiens (Human)	548
Q9UBL6	CPNE7_HUMAN	reviewed	Copine-7 (Copine VII)	CPNE7	Homo sapiens (Human)	633
P23508	CRCM_HUMAN	reviewed	Colorectal mutant cancer protein (Protein MCC)	MCC	Homo sapiens (Human)	829
O14936	CSKP_HUMAN	reviewed	Peripheral plasma membrane protein CASK (hCASK) (EC 2.7.11.1) (Calcium/calmodulin-dependent serine protein kinase) (Protein lin-2 homolog)	CASK LIN2	Homo sapiens (Human)	926
P26232	CTNA2_HUMAN	reviewed	Catenin alpha-2 (Alpha N-catenin) (Alpha-catenin-related protein)	CTNNA2 CAPR	Homo sapiens (Human)	953
Q9UBT7	CTNL1_HUMAN	reviewed	Alpha-catulin (Alpha-catenin-related protein) (ACRP) (Catenin alpha-like protein 1)	CTNNAL1	Homo sapiens (Human)	734
Q9Y6H8	CXA3_HUMAN	reviewed	Gap junction alpha-3 protein (Connexin-46) (Cx46)	GJA3	Homo sapiens (Human)	435
P48165	CXA8_HUMAN	reviewed	Gap junction alpha-8 protein (Connexin-50) (Cx50) (Lens fiber protein MP70)	GJA8	Homo sapiens (Human)	433
Q9NTQ9	CXB4_HUMAN	reviewed	Gap junction beta-4 protein (Connexin-30.3) (Cx30.3)	GJB4	Homo sapiens (Human)	266
Q99829	CPNE1_HUMAN	reviewed	Copine-1 (Chromobindin 17) (Copine I)	CPNE1 CPN1	Homo sapiens (Human)	537
O95741	CPNE6_HUMAN	reviewed	Copine-6 (Copine VI) (Neuronal-copine) (N-copine)	CPNE6	Homo sapiens (Human)	557
Q96L46	CPNS2_HUMAN	reviewed	Calpain small subunit 2 (CSS2) (Calcium-dependent protease small subunit 2)	CAPNS2	Homo sapiens (Human)	248
P46108	CRK_HUMAN	reviewed	Adapter molecule crk (Proto-oncogene c-Crk) (p38)	CRK	Homo sapiens (Human)	304
P15509	CSF2R_HUMAN	reviewed	Granulocyte-macrophage colony-stimulating factor receptor subunit alpha (GM-CSF-R-alpha) (GMCSFR-alpha) (GMR-alpha) (CDw116) (CD antigen CD116)	CSF2RA CSF2R CSF2RY	Homo sapiens (Human)	400
Q99062	CSF3R_HUMAN	reviewed	Granulocyte colony-stimulating factor receptor (G-CSF receptor) (G-CSF-R) (CD antigen CD114)	CSF3R GCSFR	Homo sapiens (Human)	836
Q9BQT9	CSTN3_HUMAN	reviewed	Calsyntenin-3 (Alcadein-beta) (Alc-beta)	CLSTN3 CS3 KIAA0726	Homo sapiens (Human)	956
P52569	CTR2_HUMAN	reviewed	Cationic amino acid transporter 2 (CAT-2) (CAT2) (Low affinity cationic amino acid transporter 2) (Solute carrier family 7 member 2)	SLC7A2 ATRC2 CAT2	Homo sapiens (Human)	658
Q8NEC5	CTSR1_HUMAN	reviewed	Cation channel sperm-associated protein 1 (CatSper1) (hCatSper)	CATSPER1	Homo sapiens (Human)	780
O60494	CUBN_HUMAN	reviewed	Cubilin (460 kDa receptor) (Intestinal intrinsic factor receptor) (Intrinsic factor-cobalamin receptor) (Intrinsic factor-vitamin B12 receptor)	CUBN IFCR	Homo sapiens (Human)	3623
O95452	CXB6_HUMAN	reviewed	Gap junction beta-6 protein (Connexin-30) (Cx30)	GJB6	Homo sapiens (Human)	261
P25025	CXCR2_HUMAN	reviewed	C-X-C chemokine receptor type 2 (CXC-R2) (CXCR-2) (CDw128b) (GRO/MGSA receptor) (High affinity interleukin-8 receptor B) (IL-8R B) (IL-8 receptor type 2) (CD antigen CD182)	CXCR2 IL8RB	Homo sapiens (Human)	360
P61073	CXCR4_HUMAN	reviewed	C-X-C chemokine receptor type 4 (CXC-R4) (CXCR-4) (FB22) (Fusin) (HM89) (LCR1) (Leukocyte-derived seven transmembrane domain receptor) (LESTR) (Lipopolysaccharide-associated protein 3) (LAP-3) (LPS-associated protein 3) (NPYRL) (Stromal cell-derived factor 1 receptor) (SDF-1 receptor) (CD antigen CD184)	CXCR4	Homo sapiens (Human)	352
P32302	CXCR5_HUMAN	reviewed	C-X-C chemokine receptor type 5 (CXC-R5) (CXCR-5) (Burkitt lymphoma receptor 1) (Monocyte-derived receptor 15) (MDR-15) (CD antigen CD185)	CXCR5 BLR1 MDR15	Homo sapiens (Human)	372
Q96KN9	CXD4_HUMAN	reviewed	Gap junction delta-4 protein (Connexin-40.1) (Cx40.1)	GJD4 CX40.1	Homo sapiens (Human)	370
Q9NZV1	CRIM1_HUMAN	reviewed	Cysteine-rich motor neuron 1 protein (CRIM-1) (Cysteine-rich repeat-containing protein S52) [Cleaved into: Processed cysteine-rich motor neuron 1 protein]	CRIM1 S52 UNQ1886/PRO4330	Homo sapiens (Human)	1036
P82279	CRUM1_HUMAN	reviewed	Protein crumbs homolog 1	CRB1	Homo sapiens (Human)	1406
Q6UVK1	CSPG4_HUMAN	reviewed	Chondroitin sulfate proteoglycan 4 (Chondroitin sulfate proteoglycan NG2) (Melanoma chondroitin sulfate proteoglycan) (Melanoma-associated chondroitin sulfate proteoglycan)	CSPG4 MCSP	Homo sapiens (Human)	2322
P16410	CTLA4_HUMAN	reviewed	Cytotoxic T-lymphocyte protein 4 (Cytotoxic T-lymphocyte-associated antigen 4) (CTLA-4) (CD antigen CD152)	CTLA4 CD152	Homo sapiens (Human)	223
P35221	CTNA1_HUMAN	reviewed	Catenin alpha-1 (Alpha E-catenin) (Cadherin-associated protein) (Renal carcinoma antigen NY-REN-13)	CTNNA1	Homo sapiens (Human)	906
Q96P56	CTSR2_HUMAN	reviewed	Cation channel sperm-associated protein 2 (CatSper2)	CATSPER2	Homo sapiens (Human)	530
Q86XM0	CTSRD_HUMAN	reviewed	Cation channel sperm-associated protein subunit delta (CatSper-delta) (CatSperdelta) (Transmembrane protein 146)	CATSPERD TMEM146	Homo sapiens (Human)	798
P78310	CXAR_HUMAN	reviewed	Coxsackievirus and adenovirus receptor (CAR) (hCAR) (CVB3-binding protein) (Coxsackievirus B-adenovirus receptor) (HCVADR)	CXADR CAR	Homo sapiens (Human)	365
O95377	CXB5_HUMAN	reviewed	Gap junction beta-5 protein (Connexin-31.1) (Cx31.1)	GJB5	Homo sapiens (Human)	273
Q9UIA0	CYH4_HUMAN	reviewed	Cytohesin-4 (PH, SEC7 and coiled-coil domain-containing protein 4)	CYTH4 CYT4 PSCD4	Homo sapiens (Human)	394
Q9Y2W7	CSEN_HUMAN	reviewed	Calsenilin (A-type potassium channel modulatory protein 3) (DRE-antagonist modulator) (DREAM) (Kv channel-interacting protein 3) (KChIP3)	KCNIP3 CSEN DREAM KCHIP3	Homo sapiens (Human)	256
P07333	CSF1R_HUMAN	reviewed	Macrophage colony-stimulating factor 1 receptor (CSF-1 receptor) (CSF-1-R) (CSF-1R) (M-CSF-R) (EC 2.7.10.1) (Proto-oncogene c-Fms) (CD antigen CD115)	CSF1R FMS	Homo sapiens (Human)	972
Q9H4D0	CSTN2_HUMAN	reviewed	Calsyntenin-2 (Alcadein-gamma) (Alc-gamma)	CLSTN2 CS2	Homo sapiens (Human)	955
Q8WWI5	CTL1_HUMAN	reviewed	Choline transporter-like protein 1 (CDw92) (Solute carrier family 44 member 1) (CD antigen CD92)	SLC44A1 CD92 CDW92 CTL1	Homo sapiens (Human)	657
O60716	CTND1_HUMAN	reviewed	Catenin delta-1 (Cadherin-associated Src substrate) (CAS) (p120 catenin) (p120(ctn)) (p120(cas))	CTNND1 KIAA0384	Homo sapiens (Human)	968
Q6PEY0	CXB7_HUMAN	reviewed	Gap junction beta-7 protein (Connexin-25) (Cx25)	GJB7 CX25	Homo sapiens (Human)	223
P25024	CXCR1_HUMAN	reviewed	C-X-C chemokine receptor type 1 (CXC-R1) (CXCR-1) (CDw128a) (High affinity interleukin-8 receptor A) (IL-8R A) (IL-8 receptor type 1) (CD antigen CD181)	CXCR1 CMKAR1 IL8RA	Homo sapiens (Human)	350
P49682	CXCR3_HUMAN	reviewed	C-X-C chemokine receptor type 3 (CXC-R3) (CXCR-3) (CKR-L2) (G protein-coupled receptor 9) (Interferon-inducible protein 10 receptor) (IP-10 receptor) (CD antigen CD183)	CXCR3 GPR9	Homo sapiens (Human)	368
P36383	CXG1_HUMAN	reviewed	Gap junction gamma-1 protein (Connexin-45) (Cx45) (Gap junction alpha-7 protein)	GJC1 GJA7	Homo sapiens (Human)	396
Q9H2A7	CXL16_HUMAN	reviewed	C-X-C motif chemokine 16 (Scavenger receptor for phosphatidylserine and oxidized low density lipoprotein) (SR-PSOX) (Small-inducible cytokine B16) (Transmembrane chemokine CXCL16)	CXCL16 SCYB16 SRPSOX UNQ2759/PRO6714	Homo sapiens (Human)	254
Q15438	CYH1_HUMAN	reviewed	Cytohesin-1 (PH, SEC7 and coiled-coil domain-containing protein 1) (SEC7 homolog B2-1)	CYTH1 D17S811E PSCD1	Homo sapiens (Human)	398
Q99418	CYH2_HUMAN	reviewed	Cytohesin-2 (ARF exchange factor) (ARF nucleotide-binding site opener) (Protein ARNO) (PH, SEC7 and coiled-coil domain-containing protein 2)	CYTH2 ARNO PSCD2 PSCD2L	Homo sapiens (Human)	400
Q717R9	CYS1_HUMAN	reviewed	Cystin-1 (Cilia-associated protein)	CYS1	Homo sapiens (Human)	158
P08034	CXB1_HUMAN	reviewed	Gap junction beta-1 protein (Connexin-32) (Cx32) (GAP junction 28 kDa liver protein)	GJB1 CX32	Homo sapiens (Human)	283
Q8NFK1	CXG3_HUMAN	reviewed	Gap junction gamma-3 protein (Connexin-30.2) (Cx30.2) (Connexin-31.3) (Cx31.3) (Gap junction epsilon-1 protein)	GJC3 GJE1	Homo sapiens (Human)	279
P13498	CY24A_HUMAN	reviewed	Cytochrome b-245 light chain (Cytochrome b(558) alpha chain) (Cytochrome b558 subunit alpha) (Neutrophil cytochrome b 22 kDa polypeptide) (Superoxide-generating NADPH oxidase light chain subunit) (p22 phagocyte B-cytochrome) (p22-phox) (p22phox)	CYBA	Homo sapiens (Human)	195
P04839	CY24B_HUMAN	reviewed	Cytochrome b-245 heavy chain (EC 1.-.-.-) (CGD91-phox) (Cytochrome b(558) subunit beta) (Cytochrome b558 subunit beta) (Heme-binding membrane glycoprotein gp91phox) (NADPH oxidase 2) (Neutrophil cytochrome b 91 kDa polypeptide) (Superoxide-generating NADPH oxidase heavy chain subunit) (gp91-1) (gp91-phox) (p22 phagocyte B-cytochrome)	CYBB NOX2	Homo sapiens (Human)	570
P08174	DAF_HUMAN	reviewed	Complement decay-accelerating factor (CD antigen CD55)	CD55 CR DAF	Homo sapiens (Human)	381
O60931	CTNS_HUMAN	reviewed	Cystinosin	CTNS	Homo sapiens (Human)	367
Q8WY07	CTR3_HUMAN	reviewed	Cationic amino acid transporter 3 (CAT-3) (CAT3) (Cationic amino acid transporter y+) (Solute carrier family 7 member 3)	SLC7A3 ATRC3 CAT3	Homo sapiens (Human)	619
P36382	CXA5_HUMAN	reviewed	Gap junction alpha-5 protein (Connexin-40) (Cx40)	GJA5	Homo sapiens (Human)	358
P29033	CXB2_HUMAN	reviewed	Gap junction beta-2 protein (Connexin-26) (Cx26)	GJB2	Homo sapiens (Human)	226
O00574	CXCR6_HUMAN	reviewed	C-X-C chemokine receptor type 6 (CXC-R6) (CXCR-6) (CDw186) (G-protein coupled receptor STRL33) (G-protein coupled receptor bonzo) (CD antigen CD186)	CXCR6 BONZO STRL33 TYMSTR	Homo sapiens (Human)	342
Q9UKL4	CXD2_HUMAN	reviewed	Gap junction delta-2 protein (Connexin-36) (Cx36) (Gap junction alpha-9 protein)	GJD2 GJA9	Homo sapiens (Human)	321
Q8N144	CXD3_HUMAN	reviewed	Gap junction delta-3 protein (Connexin-31.9) (Cx31.9) (Gap junction alpha-11 protein) (Gap junction chi-1 protein)	GJD3 GJA11 GJC1	Homo sapiens (Human)	294
A6NN92	CXE1_HUMAN	reviewed	Gap junction epsilon-1 protein (Connexin-23) (Cx23)	GJE1	Homo sapiens (Human)	205
Q5T442	CXG2_HUMAN	reviewed	Gap junction gamma-2 protein (Connexin-46.6) (Cx46.6) (Connexin-47) (Cx47) (Gap junction alpha-12 protein)	GJC2 GJA12	Homo sapiens (Human)	439
Q9NQC7	CYLD_HUMAN	reviewed	Ubiquitin carboxyl-terminal hydrolase CYLD (EC 3.4.19.12) (Deubiquitinating enzyme CYLD) (Ubiquitin thioesterase CYLD) (Ubiquitin-specific-processing protease CYLD)	CYLD CYLD1 KIAA0849 HSPC057	Homo sapiens (Human)	956
Q14118	DAG1_HUMAN	reviewed	Dystroglycan (Dystrophin-associated glycoprotein 1) [Cleaved into: Alpha-dystroglycan (Alpha-DG); Beta-dystroglycan (Beta-DG)]	DAG1	Homo sapiens (Human)	895
P35212	CXA4_HUMAN	reviewed	Gap junction alpha-4 protein (Connexin-37) (Cx37)	GJA4	Homo sapiens (Human)	333
P57773	CXA9_HUMAN	reviewed	Gap junction alpha-9 protein (Connexin-58) (Cx58) (Connexin-59) (Cx59) (Gap junction alpha-10 protein)	GJA9 GJA10	Homo sapiens (Human)	515
O75712	CXB3_HUMAN	reviewed	Gap junction beta-3 protein (Connexin-31) (Cx31)	GJB3 CX31	Homo sapiens (Human)	270
O15255	CXX1_HUMAN	reviewed	CAAX box protein 1 (Cerebral protein 5)	FAM127A CXX1 MAR8 MAR8C MART8 hucep-5	Homo sapiens (Human)	209
Q5VWQ8	DAB2P_HUMAN	reviewed	Disabled homolog 2-interacting protein (DAB2 interaction protein) (DAB2-interacting protein) (ASK-interacting protein 1) (AIP-1) (DOC-2/DAB-2 interactive protein)	DAB2IP AF9Q34 AIP1 KIAA1743	Homo sapiens (Human)	1189
O43739	CYH3_HUMAN	reviewed	Cytohesin-3 (ARF nucleotide-binding site opener 3) (Protein ARNO3) (General receptor of phosphoinositides 1) (Grp1) (PH, SEC7 and coiled-coil domain-containing protein 3)	CYTH3 ARNO3 GRP1 PSCD3	Homo sapiens (Human)	400
Q05329	DCE2_HUMAN	reviewed	Glutamate decarboxylase 2 (EC 4.1.1.15) (65 kDa glutamic acid decarboxylase) (GAD-65) (Glutamate decarboxylase 65 kDa isoform)	GAD2 GAD65	Homo sapiens (Human)	585
Q8IWE4	DCNL3_HUMAN	reviewed	DCN1-like protein 3 (DCUN1 domain-containing protein 3) (Defective in cullin neddylation protein 1-like protein 3) (Squamous cell carcinoma-related oncogene 3)	DCUN1D3 SCCRO3	Homo sapiens (Human)	304
Q08345	DDR1_HUMAN	reviewed	Epithelial discoidin domain-containing receptor 1 (Epithelial discoidin domain receptor 1) (EC 2.7.10.1) (CD167 antigen-like family member A) (Cell adhesion kinase) (Discoidin receptor tyrosine kinase) (HGK2) (Mammary carcinoma kinase 10) (MCK-10) (Protein-tyrosine kinase 3A) (Protein-tyrosine kinase RTK-6) (TRK E) (Tyrosine kinase DDR) (Tyrosine-protein kinase CAK) (CD antigen CD167a)	DDR1 CAK EDDR1 NEP NTRK4 PTK3A RTK6 TRKE	Homo sapiens (Human)	913
Q16832	DDR2_HUMAN	reviewed	Discoidin domain-containing receptor 2 (Discoidin domain receptor 2) (EC 2.7.10.1) (CD167 antigen-like family member B) (Discoidin domain-containing receptor tyrosine kinase 2) (Neurotrophic tyrosine kinase, receptor-related 3) (Receptor protein-tyrosine kinase TKT) (Tyrosine-protein kinase TYRO10) (CD antigen CD167b)	DDR2 NTRKR3 TKT TYRO10	Homo sapiens (Human)	855
O94850	DEND_HUMAN	reviewed	Dendrin	DDN KIAA0749	Homo sapiens (Human)	711
P15924	DESP_HUMAN	reviewed	Desmoplakin (DP) (250/210 kDa paraneoplastic pemphigus antigen)	DSP	Homo sapiens (Human)	2871
Q9H295	DCSTP_HUMAN	reviewed	Dendritic cell-specific transmembrane protein (DC-STAMP) (hDC-STAMP) (Dendrocyte-expressed seven transmembrane protein) (IL-four-induced protein) (FIND) (Transmembrane 7 superfamily member 4)	DCSTAMP TM7SF4	Homo sapiens (Human)	470
P17661	DESM_HUMAN	reviewed	Desmin	DES	Homo sapiens (Human)	470
Q86XP1	DGKH_HUMAN	reviewed	Diacylglycerol kinase eta (DAG kinase eta) (EC 2.7.1.107) (Diglyceride kinase eta) (DGK-eta)	DGKH	Homo sapiens (Human)	1220
P52824	DGKQ_HUMAN	reviewed	Diacylglycerol kinase theta (DAG kinase theta) (EC 2.7.1.107) (Diglyceride kinase theta) (DGK-theta)	DGKQ DAGK4	Homo sapiens (Human)	942
Q8NCG7	DGLB_HUMAN	reviewed	Sn1-specific diacylglycerol lipase beta (DGL-beta) (EC 3.1.1.-) (KCCR13L)	DAGLB	Homo sapiens (Human)	672
O43323	DHH_HUMAN	reviewed	Desert hedgehog protein (DHH) (HHG-3) [Cleaved into: Desert hedgehog protein N-product; Desert hedgehog protein C-product]	DHH	Homo sapiens (Human)	396
Q9UJU6	DBNL_HUMAN	reviewed	Drebrin-like protein (Cervical SH3P7) (Cervical mucin-associated protein) (Drebrin-F) (HPK1-interacting protein of 55 kDa) (HIP-55) (SH3 domain-containing protein 7)	DBNL CMAP SH3P7 PP5423	Homo sapiens (Human)	430
Q08495	DEMA_HUMAN	reviewed	Dematin (Dematin actin-binding protein) (Erythrocyte membrane protein band 4.9)	DMTN DMT EPB49	Homo sapiens (Human)	405
O95057	DIRA1_HUMAN	reviewed	GTP-binding protein Di-Ras1 (Distinct subgroup of the Ras family member 1) (Ras-related inhibitor of cell growth) (Rig) (Small GTP-binding tumor suppressor 1)	DIRAS1 GBTS1 RIG	Homo sapiens (Human)	198
O95786	DDX58_HUMAN	reviewed	Probable ATP-dependent RNA helicase DDX58 (EC 3.6.4.13) (DEAD box protein 58) (RIG-I-like receptor 1) (RLR-1) (Retinoic acid-inducible gene 1 protein) (RIG-1) (Retinoic acid-inducible gene I protein) (RIG-I)	DDX58	Homo sapiens (Human)	925
Q96HU8	DIRA2_HUMAN	reviewed	GTP-binding protein Di-Ras2 (Distinct subgroup of the Ras family member 2)	DIRAS2	Homo sapiens (Human)	199
Q9NRI5	DISC1_HUMAN	reviewed	Disrupted in schizophrenia 1 protein	DISC1 KIAA0457	Homo sapiens (Human)	854
P78352	DLG4_HUMAN	reviewed	Disks large homolog 4 (Postsynaptic density protein 95) (PSD-95) (Synapse-associated protein 90) (SAP-90) (SAP90)	DLG4 PSD95	Homo sapiens (Human)	724
Q8TDM6	DLG5_HUMAN	reviewed	Disks large homolog 5 (Discs large protein P-dlg) (Placenta and prostate DLG)	DLG5 KIAA0583 PDLG	Homo sapiens (Human)	1919
O14490	DLGP1_HUMAN	reviewed	Disks large-associated protein 1 (DAP-1) (Guanylate kinase-associated protein) (hGKAP) (PSD-95/SAP90-binding protein 1) (SAP90/PSD-95-associated protein 1) (SAPAP1)	DLGAP1 DAP1 GKAP	Homo sapiens (Human)	977
Q9P1A6	DLGP2_HUMAN	reviewed	Disks large-associated protein 2 (DAP-2) (PSD-95/SAP90-binding protein 2) (SAP90/PSD-95-associated protein 2) (SAPAP2)	DLGAP2 DAP2	Homo sapiens (Human)	1054
Q9H4E7	DEFI6_HUMAN	reviewed	Differentially expressed in FDCP 6 homolog (DEF-6) (IRF4-binding protein)	DEF6 IBP	Homo sapiens (Human)	631
P11532	DMD_HUMAN	reviewed	Dystrophin	DMD	Homo sapiens (Human)	3685
Q5VZ89	DEN4C_HUMAN	reviewed	DENN domain-containing protein 4C	DENND4C C9orf55 C9orf55B	Homo sapiens (Human)	1673
P56937	DHB7_HUMAN	reviewed	3-keto-steroid reductase (EC 1.1.1.270) (17-beta-hydroxysteroid dehydrogenase 7) (17-beta-HSD 7) (Estradiol 17-beta-dehydrogenase 7) (EC 1.1.1.62) (Short chain dehydrogenase/reductase family 37C member 1)	HSD17B7 SDR37C1 UNQ2563/PRO6243	Homo sapiens (Human)	341
Q8TEH3	DEN1A_HUMAN	reviewed	DENN domain-containing protein 1A (Connecdenn 1) (Connecdenn) (Protein FAM31A)	DENND1A FAM31A KIAA1608	Homo sapiens (Human)	1009
Q8NFT8	DNER_HUMAN	reviewed	Delta and Notch-like epidermal growth factor-related receptor	DNER BET UNQ262/PRO299	Homo sapiens (Human)	737
P16444	DPEP1_HUMAN	reviewed	Dipeptidase 1 (EC 3.4.13.19) (Dehydropeptidase-I) (Microsomal dipeptidase) (Renal dipeptidase) (hRDP)	DPEP1 MDP RDP	Homo sapiens (Human)	411
Q13574	DGKZ_HUMAN	reviewed	Diacylglycerol kinase zeta (DAG kinase zeta) (EC 2.7.1.107) (Diglyceride kinase zeta) (DGK-zeta)	DGKZ DAGK6	Homo sapiens (Human)	1117
O95886	DLGP3_HUMAN	reviewed	Disks large-associated protein 3 (DAP-3) (PSD-95/SAP90-binding protein 3) (SAP90/PSD-95-associated protein 3) (SAPAP3)	DLGAP3 DAP3	Homo sapiens (Human)	979
Q9UDY4	DNJB4_HUMAN	reviewed	DnaJ homolog subfamily B member 4 (Heat shock 40 kDa protein 1 homolog) (HSP40 homolog) (Heat shock protein 40 homolog) (Human liver DnaJ-like protein)	DNAJB4 DNAJW HLJ1	Homo sapiens (Human)	337
P20036	DPA1_HUMAN	reviewed	HLA class II histocompatibility antigen, DP alpha 1 chain (DP(W3)) (DP(W4)) (HLA-SB alpha chain) (MHC class II DP3-alpha) (MHC class II DPA1)	HLA-DPA1 HLA-DP1A HLASB	Homo sapiens (Human)	260
Q6UX65	DRAM2_HUMAN	reviewed	DNA damage-regulated autophagy modulator protein 2 (Transmembrane protein 77)	DRAM2 TMEM77 PSEC0031 UNQ154/PRO180	Homo sapiens (Human)	266
P79483	DRB3_HUMAN	reviewed	HLA class II histocompatibility antigen, DR beta 3 chain (MHC class II antigen DRB3)	HLA-DRB3	Homo sapiens (Human)	266
O60610	DIAP1_HUMAN	reviewed	Protein diaphanous homolog 1 (Diaphanous-related formin-1) (DRF1)	DIAPH1 DIAP1	Homo sapiens (Human)	1272
Q15700	DLG2_HUMAN	reviewed	Disks large homolog 2 (Channel-associated protein of synapse-110) (Chapsyn-110) (Postsynaptic density protein PSD-93)	DLG2	Homo sapiens (Human)	870
P27487	DPP4_HUMAN	reviewed	Dipeptidyl peptidase 4 (EC 3.4.14.5) (ADABP) (Adenosine deaminase complexing protein 2) (ADCP-2) (Dipeptidyl peptidase IV) (DPP IV) (T-cell activation antigen CD26) (TP103) (CD antigen CD26) [Cleaved into: Dipeptidyl peptidase 4 membrane form (Dipeptidyl peptidase IV membrane form); Dipeptidyl peptidase 4 soluble form (Dipeptidyl peptidase IV soluble form)]	DPP4 ADCP2 CD26	Homo sapiens (Human)	766
P21728	DRD1_HUMAN	reviewed	D(1A) dopamine receptor (Dopamine D1 receptor)	DRD1	Homo sapiens (Human)	446
Q8TD84	DSCL1_HUMAN	reviewed	Down syndrome cell adhesion molecule-like protein 1 (Down syndrome cell adhesion molecule 2)	DSCAML1 DSCAM2 KIAA1132	Homo sapiens (Human)	2053
Q9Y4D2	DGLA_HUMAN	reviewed	Sn1-specific diacylglycerol lipase alpha (DGL-alpha) (EC 3.1.1.-) (Neural stem cell-derived dendrite regulator)	DAGLA C11orf11 KIAA0659 NSDDR	Homo sapiens (Human)	1042
O95661	DIRA3_HUMAN	reviewed	GTP-binding protein Di-Ras3 (Distinct subgroup of the Ras family member 3) (Rho-related GTP-binding protein RhoI)	DIRAS3 ARHI NOEY2 RHOI	Homo sapiens (Human)	229
O00548	DLL1_HUMAN	reviewed	Delta-like protein 1 (Drosophila Delta homolog 1) (Delta1) (H-Delta-1)	DLL1 UNQ146/PRO172	Homo sapiens (Human)	723
Q96EY1	DNJA3_HUMAN	reviewed	DnaJ homolog subfamily A member 3, mitochondrial (DnaJ protein Tid-1) (hTid-1) (Hepatocellular carcinoma-associated antigen 57) (Tumorous imaginal discs protein Tid56 homolog)	DNAJA3 HCA57 TID1	Homo sapiens (Human)	480
Q8N1I0	DOCK4_HUMAN	reviewed	Dedicator of cytokinesis protein 4	DOCK4 KIAA0716	Homo sapiens (Human)	1966
Q8N608	DPP10_HUMAN	reviewed	Inactive dipeptidyl peptidase 10 (Dipeptidyl peptidase IV-related protein 3) (DPRP-3) (Dipeptidyl peptidase X) (DPP X) (Dipeptidyl peptidase-like protein 2) (DPL2)	DPP10 DPRP3 KIAA1492	Homo sapiens (Human)	796
P21917	DRD4_HUMAN	reviewed	D(4) dopamine receptor (D(2C) dopamine receptor) (Dopamine D4 receptor)	DRD4	Homo sapiens (Human)	467
Q02487	DSC2_HUMAN	reviewed	Desmocollin-2 (Cadherin family member 2) (Desmocollin-3) (Desmosomal glycoprotein II) (Desmosomal glycoprotein III)	DSC2 CDHF2 DSC3	Homo sapiens (Human)	901
O60469	DSCAM_HUMAN	reviewed	Down syndrome cell adhesion molecule (CHD2)	DSCAM	Homo sapiens (Human)	2012
Q12959	DLG1_HUMAN	reviewed	Disks large homolog 1 (Synapse-associated protein 97) (SAP-97) (SAP97) (hDlg)	DLG1	Homo sapiens (Human)	904
Q9NR61	DLL4_HUMAN	reviewed	Delta-like protein 4 (Drosophila Delta homolog 4) (Delta4)	DLL4 UNQ1895/PRO4341	Homo sapiens (Human)	685
Q09013	DMPK_HUMAN	reviewed	Myotonin-protein kinase (MT-PK) (EC 2.7.11.1) (DM-kinase) (DMK) (DM1 protein kinase) (DMPK) (Myotonic dystrophy protein kinase)	DMPK DM1PK MDPK	Homo sapiens (Human)	629
Q9H3Z4	DNJC5_HUMAN	reviewed	DnaJ homolog subfamily C member 5 (Ceroid-lipofuscinosis neuronal protein 4) (Cysteine string protein) (CSP)	DNAJC5 CLN4	Homo sapiens (Human)	198
Q7L591	DOK3_HUMAN	reviewed	Docking protein 3 (Downstream of tyrosine kinase 3)	DOK3	Homo sapiens (Human)	496
P01906	DQA2_HUMAN	reviewed	HLA class II histocompatibility antigen, DQ alpha 2 chain (DX alpha chain) (HLA class II histocompatibility antigen, DQ(6) alpha chain) (HLA-DQA1) (MHC class II DQA2)	HLA-DQA2 HLA-DXA	Homo sapiens (Human)	255
P01920	DQB1_HUMAN	reviewed	HLA class II histocompatibility antigen, DQ beta 1 chain (MHC class II antigen DQB1)	HLA-DQB1 HLA-DQB	Homo sapiens (Human)	261
Q30154	DRB5_HUMAN	reviewed	HLA class II histocompatibility antigen, DR beta 5 chain (DR beta-5) (DR2-beta-2) (Dw2) (MHC class II antigen DRB5)	HLA-DRB5	Homo sapiens (Human)	266
Q13474	DRP2_HUMAN	reviewed	Dystrophin-related protein 2 (DRP-2)	DRP2	Homo sapiens (Human)	957
Q14574	DSC3_HUMAN	reviewed	Desmocollin-3 (Cadherin family member 3) (Desmocollin-4) (HT-CP)	DSC3 CDHF3 DSC4	Homo sapiens (Human)	896
Q9Y4J8	DTNA_HUMAN	reviewed	Dystrobrevin alpha (DTN-A) (Alpha-dystrobrevin) (Dystrophin-related protein 3)	DTNA DRP3	Homo sapiens (Human)	743
A2CJ06	DYTN_HUMAN	reviewed	Dystrotelin	DYTN	Homo sapiens (Human)	578
O43491	E41L2_HUMAN	reviewed	Band 4.1-like protein 2 (Generally expressed protein 4.1) (4.1G)	EPB41L2	Homo sapiens (Human)	1005
Q8WXX5	DNJC9_HUMAN	reviewed	DnaJ homolog subfamily C member 9 (HDJC9) (DnaJ protein SB73)	DNAJC9	Homo sapiens (Human)	260
Q14184	DOC2B_HUMAN	reviewed	Double C2-like domain-containing protein beta (Doc2-beta)	DOC2B DOC2BL	Homo sapiens (Human)	412
P01909	DQA1_HUMAN	reviewed	HLA class II histocompatibility antigen, DQ alpha 1 chain (DC-1 alpha chain) (DC-alpha) (HLA-DCA) (MHC class II DQA1)	HLA-DQA1	Homo sapiens (Human)	254
P32926	DSG3_HUMAN	reviewed	Desmoglein-3 (130 kDa pemphigus vulgaris antigen) (PVA) (Cadherin family member 6)	DSG3 CDHF6	Homo sapiens (Human)	999
Q6XUX3	DUSTY_HUMAN	reviewed	Dual serine/threonine and tyrosine protein kinase (EC 2.7.12.1) (Dusty protein kinase) (Dusty PK) (RIP-homologous kinase) (Receptor-interacting serine/threonine-protein kinase 5) (Sugen kinase 496) (SgK496)	DSTYK KIAA0472 RIP5 RIPK5 SGK496 HDCMD38P	Homo sapiens (Human)	929
Q18PE1	DOK7_HUMAN	reviewed	Protein Dok-7 (Downstream of tyrosine kinase 7)	DOK7 C4orf25	Homo sapiens (Human)	504
P04440	DPB1_HUMAN	reviewed	HLA class II histocompatibility antigen, DP beta 1 chain (HLA class II histocompatibility antigen, DP(W4) beta chain) (MHC class II antigen DPB1)	HLA-DPB1 HLA-DP1B	Homo sapiens (Human)	258
P13762	DRB4_HUMAN	reviewed	HLA class II histocompatibility antigen, DR beta 4 chain (MHC class II antigen DRB4)	HLA-DRB4	Homo sapiens (Human)	266
P14416	DRD2_HUMAN	reviewed	D(2) dopamine receptor (Dopamine D2 receptor)	DRD2	Homo sapiens (Human)	443
P35462	DRD3_HUMAN	reviewed	D(3) dopamine receptor (Dopamine D3 receptor)	DRD3	Homo sapiens (Human)	400
Q86SJ6	DSG4_HUMAN	reviewed	Desmoglein-4 (Cadherin family member 13)	DSG4 CDHF13	Homo sapiens (Human)	1040
P50570	DYN2_HUMAN	reviewed	Dynamin-2 (EC 3.6.5.5)	DNM2 DYN2	Homo sapiens (Human)	870
P42658	DPP6_HUMAN	reviewed	Dipeptidyl aminopeptidase-like protein 6 (DPPX) (Dipeptidyl aminopeptidase-related protein) (Dipeptidyl peptidase 6) (Dipeptidyl peptidase IV-like protein) (Dipeptidyl peptidase VI) (DPP VI)	DPP6	Homo sapiens (Human)	865
P01903	DRA_HUMAN	reviewed	HLA class II histocompatibility antigen, DR alpha chain (MHC class II antigen DRA)	HLA-DRA HLA-DRA1	Homo sapiens (Human)	254
Q08554	DSC1_HUMAN	reviewed	Desmocollin-1 (Cadherin family member 1) (Desmosomal glycoprotein 2/3) (DG2/DG3)	DSC1 CDHF1	Homo sapiens (Human)	894
Q02413	DSG1_HUMAN	reviewed	Desmoglein-1 (Cadherin family member 4) (Desmosomal glycoprotein 1) (DG1) (DGI) (Pemphigus foliaceus antigen)	DSG1 CDHF4	Homo sapiens (Human)	1049
Q9NRD8	DUOX2_HUMAN	reviewed	Dual oxidase 2 (EC 1.11.1.-) (EC 1.6.3.1) (Large NOX 2) (Long NOX 2) (NADH/NADPH thyroid oxidase p138-tox) (NADPH oxidase/peroxidase DUOX2) (NADPH thyroid oxidase 2) (Thyroid oxidase 2) (p138 thyroid oxidase)	DUOX2 LNOX2 THOX2	Homo sapiens (Human)	1548
O14641	DVL2_HUMAN	reviewed	Segment polarity protein dishevelled homolog DVL-2 (Dishevelled-2) (DSH homolog 2)	DVL2	Homo sapiens (Human)	736
Q9Y2J2	E41L3_HUMAN	reviewed	Band 4.1-like protein 3 (4.1B) (Differentially expressed in adenocarcinoma of the lung protein 1) (DAL-1) [Cleaved into: Band 4.1-like protein 3, N-terminally processed]	EPB41L3 DAL1 KIAA0987	Homo sapiens (Human)	1087
P25101	EDNRA_HUMAN	reviewed	Endothelin-1 receptor (Endothelin A receptor) (ET-A) (ETA-R) (hET-AR)	EDNRA ETA ETRA	Homo sapiens (Human)	427
Q9Y2G0	EFR3B_HUMAN	reviewed	Protein EFR3 homolog B	EFR3B KIAA0953	Homo sapiens (Human)	817
P05538	DQB2_HUMAN	reviewed	HLA class II histocompatibility antigen, DQ beta 2 chain (HLA class II histocompatibility antigen, DX beta chain) (MHC class II antigen DQB2)	HLA-DQB2 HLA-DXB	Homo sapiens (Human)	268
P21918	DRD5_HUMAN	reviewed	D(1B) dopamine receptor (D(5) dopamine receptor) (D1beta dopamine receptor) (Dopamine D5 receptor)	DRD5 DRD1B DRD1L2	Homo sapiens (Human)	477
Q14126	DSG2_HUMAN	reviewed	Desmoglein-2 (Cadherin family member 5) (HDGC)	DSG2 CDHF5	Homo sapiens (Human)	1118
Q9H1R2	DUS15_HUMAN	reviewed	Dual specificity protein phosphatase 15 (EC 3.1.3.16) (EC 3.1.3.48) (VH1-related member Y) (Vaccinia virus VH1-related dual-specific protein phosphatase Y)	DUSP15 C20orf57 VHY	Homo sapiens (Human)	295
P52798	EFNA4_HUMAN	reviewed	Ephrin-A4 (EPH-related receptor tyrosine kinase ligand 4) (LERK-4)	EFNA4 EPLG4 LERK4	Homo sapiens (Human)	201
Q14156	EFR3A_HUMAN	reviewed	Protein EFR3 homolog A (Protein EFR3-like)	EFR3A KIAA0143	Homo sapiens (Human)	821
Q96EV8	DTBP1_HUMAN	reviewed	Dysbindin (Biogenesis of lysosome-related organelles complex 1 subunit 8) (BLOC-1 subunit 8) (Dysbindin-1) (Dystrobrevin-binding protein 1) (Hermansky-Pudlak syndrome 7 protein) (HPS7 protein)	DTNBP1 BLOC1S8 My031	Homo sapiens (Human)	351
O14640	DVL1_HUMAN	reviewed	Segment polarity protein dishevelled homolog DVL-1 (Dishevelled-1) (DSH homolog 1)	DVL1	Homo sapiens (Human)	695
O75923	DYSF_HUMAN	reviewed	Dysferlin (Dystrophy-associated fer-1-like protein) (Fer-1-like protein 1)	DYSF FER1L1	Homo sapiens (Human)	2080
Q19T08	ECSCR_HUMAN	reviewed	Endothelial cell-specific chemotaxis regulator (Apoptosis regulator through modulating IAP expression) (ARIA) (Endothelial cell-specific molecule 2)	ECSCR ECSM2	Homo sapiens (Human)	205
Q92838	EDA_HUMAN	reviewed	Ectodysplasin-A (Ectodermal dysplasia protein) (EDA protein) [Cleaved into: Ectodysplasin-A, membrane form; Ectodysplasin-A, secreted form]	EDA ED1 EDA2	Homo sapiens (Human)	391
P24530	EDNRB_HUMAN	reviewed	Endothelin B receptor (ET-B) (ET-BR) (Endothelin receptor non-selective type)	EDNRB ETRB	Homo sapiens (Human)	442
O43921	EFNA2_HUMAN	reviewed	Ephrin-A2 (EPH-related receptor tyrosine kinase ligand 6) (LERK-6) (HEK7 ligand) (HEK7-L)	EFNA2 EPLG6 LERK6	Homo sapiens (Human)	213
P52797	EFNA3_HUMAN	reviewed	Ephrin-A3 (EFL-2) (EHK1 ligand) (EHK1-L) (EPH-related receptor tyrosine kinase ligand 3) (LERK-3)	EFNA3 EFL2 EPLG3 LERK3	Homo sapiens (Human)	238
P52803	EFNA5_HUMAN	reviewed	Ephrin-A5 (AL-1) (EPH-related receptor tyrosine kinase ligand 7) (LERK-7)	EFNA5 EPLG7 LERK7	Homo sapiens (Human)	228
Q9NZN4	EHD2_HUMAN	reviewed	EH domain-containing protein 2 (PAST homolog 2)	EHD2 PAST2	Homo sapiens (Human)	543
Q92556	ELMO1_HUMAN	reviewed	Engulfment and cell motility protein 1 (Protein ced-12 homolog)	ELMO1 KIAA0281	Homo sapiens (Human)	727
Q9NRD9	DUOX1_HUMAN	reviewed	Dual oxidase 1 (EC 1.11.1.-) (EC 1.6.3.1) (Large NOX 1) (Long NOX 1) (NADPH thyroid oxidase 1) (Thyroid oxidase 1)	DUOX1 DUOX LNOX1 THOX1	Homo sapiens (Human)	1551
Q8NCM8	DYHC2_HUMAN	reviewed	Cytoplasmic dynein 2 heavy chain 1 (Cytoplasmic dynein 2 heavy chain) (Dynein cytoplasmic heavy chain 2) (Dynein heavy chain 11) (hDHC11) (Dynein heavy chain isotype 1B)	DYNC2H1 DHC1B DHC2 DNCH2 DYH1B KIAA1997	Homo sapiens (Human)	4307
Q8N1N2	DYNAP_HUMAN	reviewed	Dynactin-associated protein (Full)	DYNAP C18orf26	Homo sapiens (Human)	210
P43005	EAA3_HUMAN	reviewed	Excitatory amino acid transporter 3 (Excitatory amino-acid carrier 1) (Neuronal and epithelial glutamate transporter) (Sodium-dependent glutamate/aspartate transporter 3) (Solute carrier family 1 member 1)	SLC1A1 EAAC1 EAAT3	Homo sapiens (Human)	524
Q9NZN3	EHD3_HUMAN	reviewed	EH domain-containing protein 3 (PAST homolog 3)	EHD3 EHD2 PAST3	Homo sapiens (Human)	535
Q902F9	EN113_HUMAN	reviewed	Endogenous retrovirus group K member 113 Env polyprotein (EnvK5 protein) (Envelope polyprotein) (HERV-K113 envelope protein) (HERV-K_19p13.11 provirus ancestral Env polyprotein) [Cleaved into: Surface protein (SU); Transmembrane protein (TM)]	HERVK_113	Homo sapiens (Human)	699
Q03001	DYST_HUMAN	reviewed	Dystonin (230 kDa bullous pemphigoid antigen) (230/240 kDa bullous pemphigoid antigen) (Bullous pemphigoid antigen 1) (BPA) (Bullous pemphigoid antigen) (Dystonia musculorum protein) (Hemidesmosomal plaque protein)	DST BP230 BP240 BPAG1 DMH DT KIAA0728	Homo sapiens (Human)	7570
P42892	ECE1_HUMAN	reviewed	Endothelin-converting enzyme 1 (ECE-1) (EC 3.4.24.71)	ECE1	Homo sapiens (Human)	770
Q9H223	EHD4_HUMAN	reviewed	EH domain-containing protein 4 (Hepatocellular carcinoma-associated protein 10/11) (PAST homolog 4)	EHD4 HCA10 HCA11 PAST4 FKSG7	Homo sapiens (Human)	541
P54851	EMP2_HUMAN	reviewed	Epithelial membrane protein 2 (EMP-2) (Protein XMP)	EMP2 XMP	Homo sapiens (Human)	167
P09104	ENOG_HUMAN	reviewed	Gamma-enolase (EC 4.2.1.11) (2-phospho-D-glycerate hydro-lyase) (Enolase 2) (Neural enolase) (Neuron-specific enolase) (NSE)	ENO2	Homo sapiens (Human)	434
Q6UWR7	ENPP6_HUMAN	reviewed	Ectonucleotide pyrophosphatase/phosphodiesterase family member 6 (E-NPP 6) (NPP-6) (EC 3.1.4.-) (EC 3.1.4.38) (Choline-specific glycerophosphodiester phosphodiesterase) (Glycerophosphocholine cholinephosphodiesterase) (GPC-Cpde)	ENPP6 UNQ1889/PRO4334	Homo sapiens (Human)	440
Q5MY95	ENTP8_HUMAN	reviewed	Ectonucleoside triphosphate diphosphohydrolase 8 (E-NTPDase 8) (NTPDase 8) (NTPDase8) (EC 3.6.1.5)	ENTPD8 UNQ2492/PRO5779	Homo sapiens (Human)	495
P60507	EFC1_HUMAN	reviewed	Endogenous retrovirus group FC1 Env polyprotein (Envelope polyprotein) (Fc1env) (HERV-F(c)1_Xq21.33 provirus ancestral Env polyprotein) (HERV-Fc1env) [Cleaved into: Surface protein (SU); Transmembrane protein (TM)]	ERVFC1	Homo sapiens (Human)	584
Q9N2J8	ENH3_HUMAN	reviewed	HERV-H_2q24.1 provirus ancestral Env polyprotein (Env protein HERV-H/p59) (Envelope polyprotein) (HERV-H/env59) [Cleaved into: Surface protein (SU); Transmembrane protein (TM)]		Homo sapiens (Human)	555
P61566	ENK24_HUMAN	reviewed	Endogenous retrovirus group K member 24 Env polyprotein (Envelope polyprotein) (HERV-K101 envelope protein) (HERV-K_22q11.21 provirus ancestral Env polyprotein) [Cleaved into: Surface protein (SU); Transmembrane protein (TM)]	ERVK-24	Homo sapiens (Human)	588
Q902F8	ENK8_HUMAN	reviewed	Endogenous retrovirus group K member 8 Env polyprotein (EnvK6 protein) (Envelope polyprotein) (HERV-K115 envelope protein) (HERV-K_8p23.1 provirus ancestral Env polyprotein) [Cleaved into: Surface protein (SU); Transmembrane protein (TM)]	ERVK-8	Homo sapiens (Human)	699
P29320	EPHA3_HUMAN	reviewed	Ephrin type-A receptor 3 (EC 2.7.10.1) (EPH-like kinase 4) (EK4) (hEK4) (HEK) (Human embryo kinase) (Tyrosine-protein kinase TYRO4) (Tyrosine-protein kinase receptor ETK1) (Eph-like tyrosine kinase 1)	EPHA3 ETK ETK1 HEK TYRO4	Homo sapiens (Human)	983
P54764	EPHA4_HUMAN	reviewed	Ephrin type-A receptor 4 (EC 2.7.10.1) (EPH-like kinase 8) (EK8) (hEK8) (Tyrosine-protein kinase TYRO1) (Tyrosine-protein kinase receptor SEK)	EPHA4 HEK8 SEK TYRO1	Homo sapiens (Human)	986
Q5JZY3	EPHAA_HUMAN	reviewed	Ephrin type-A receptor 10 (EC 2.7.10.1)	EPHA10	Homo sapiens (Human)	1008
Q9Y6I3	EPN1_HUMAN	reviewed	Epsin-1 (EH domain-binding mitotic phosphoprotein) (EPS-15-interacting protein 1)	EPN1	Homo sapiens (Human)	576
P19235	EPOR_HUMAN	reviewed	Erythropoietin receptor (EPO-R)	EPOR	Homo sapiens (Human)	508
Q9N2K0	ENH1_HUMAN	reviewed	HERV-H_2q24.3 provirus ancestral Env polyprotein (Env protein HERV-H/p62) (Env protein HERV-H19) (Env protein HERV-Hcl.3) (Envelope polyprotein) (HERV-H/env62) [Cleaved into: Surface protein (SU); Transmembrane protein (TM)]		Homo sapiens (Human)	584
P61570	ENK25_HUMAN	reviewed	Endogenous retrovirus group K member 25 Env polyprotein (Envelope polyprotein) (HERV-K_11q22.1 provirus ancestral Env polyprotein) [Cleaved into: Surface protein (SU); Transmembrane protein (TM)]	ERVK-25	Homo sapiens (Human)	661
Q69384	ENK6_HUMAN	reviewed	Endogenous retrovirus group K member 6 Env polyprotein (EnvK2 protein) (Envelope polyprotein) (HERV-K(C7) envelope protein) (HERV-K(HML-2.HOM) envelope protein) (HERV-K108 envelope protein) (HERV-K_7p22.1 provirus ancestral Env polyprotein) [Cleaved into: Surface protein (SU); Transmembrane protein (TM)]	ERVK-6 ERVK6	Homo sapiens (Human)	699
Q9UKH3	ENK9_HUMAN	reviewed	Endogenous retrovirus group K member 9 Env polyprotein (EnvK4 protein) (Envelope polyprotein) (HERV-K(C6) envelope protein) (HERV-K109 envelope protein) (HERV-K_6q14.1 provirus ancestral Env polyprotein) [Cleaved into: Surface protein (SU); Transmembrane protein (TM)]	ERVK-9	Homo sapiens (Human)	698
P29317	EPHA2_HUMAN	reviewed	Ephrin type-A receptor 2 (EC 2.7.10.1) (Epithelial cell kinase) (Tyrosine-protein kinase receptor ECK)	EPHA2 ECK	Homo sapiens (Human)	976
P54753	EPHB3_HUMAN	reviewed	Ephrin type-B receptor 3 (EC 2.7.10.1) (EPH-like tyrosine kinase 2) (EPH-like kinase 2) (Embryonic kinase 2) (EK2) (hEK2) (Tyrosine-protein kinase TYRO6)	EPHB3 ETK2 HEK2 TYRO6	Homo sapiens (Human)	998
P20827	EFNA1_HUMAN	reviewed	Ephrin-A1 (EPH-related receptor tyrosine kinase ligand 1) (LERK-1) (Immediate early response protein B61) (Tumor necrosis factor alpha-induced protein 4) (TNF alpha-induced protein 4) [Cleaved into: Ephrin-A1, secreted form]	EFNA1 EPLG1 LERK1 TNFAIP4	Homo sapiens (Human)	205
Q9H4M9	EHD1_HUMAN	reviewed	EH domain-containing protein 1 (PAST homolog 1) (hPAST1) (Testilin)	EHD1 PAST PAST1 CDABP0131	Homo sapiens (Human)	534
P06733	ENOA_HUMAN	reviewed	Alpha-enolase (EC 4.2.1.11) (2-phospho-D-glycerate hydro-lyase) (C-myc promoter-binding protein) (Enolase 1) (MBP-1) (MPB-1) (Non-neural enolase) (NNE) (Phosphopyruvate hydratase) (Plasminogen-binding protein)	ENO1 ENO1L1 MBPB1 MPB1	Homo sapiens (Human)	434
Q9UBC2	EP15R_HUMAN	reviewed	Epidermal growth factor receptor substrate 15-like 1 (Eps15-related protein) (Eps15R)	EPS15L1 EPS15R	Homo sapiens (Human)	864
O95278	EPM2A_HUMAN	reviewed	Laforin (EC 3.1.3.-) (EC 3.1.3.16) (EC 3.1.3.48) (Glucan phosphatase) (Lafora PTPase) (LAFPTPase)	EPM2A	Homo sapiens (Human)	331
Q12929	EPS8_HUMAN	reviewed	Epidermal growth factor receptor kinase substrate 8	EPS8	Homo sapiens (Human)	822
O14944	EREG_HUMAN	reviewed	Proepiregulin [Cleaved into: Epiregulin (EPR)]	EREG	Homo sapiens (Human)	169
A0FGR9	ESYT3_HUMAN	reviewed	Extended synaptotagmin-3 (E-Syt3) (Chr3Syt)	ESYT3 FAM62C	Homo sapiens (Human)	886
O42043	ENK18_HUMAN	reviewed	Endogenous retrovirus group K member 18 Env polyprotein (Envelope polyprotein) (HERV-K(C1a) envelope protein) (HERV-K110 envelope protein) (HERV-K18 envelope protein) (HERV-K18 superantigen) (HERV-K_1q23.3 provirus ancestral Env polyprotein) (IDDMK1,2 22 envelope protein) (IDDMK1,2 22 superantigen) [Cleaved into: Surface protein (SU); Transmembrane protein (TM)]	ERVK-18	Homo sapiens (Human)	560
O71037	ENK19_HUMAN	reviewed	Endogenous retrovirus group K member 19 Env polyprotein (EnvK3 protein) (Envelope polyprotein) (HERV-K(C19) envelope protein) (HERV-K_19q11 provirus ancestral Env polyprotein) [Cleaved into: Surface protein (SU); Transmembrane protein (TM)]	ERVK-19	Homo sapiens (Human)	699
P61567	ENK7_HUMAN	reviewed	Endogenous retrovirus group K member 7 Env polyprotein (Envelope polyprotein) (HERV-K(III) envelope protein) (HERV-K102 envelope protein) (HERV-K_1q22 provirus ancestral Env polyprotein) [Cleaved into: Surface protein (SU); Transmembrane protein (TM)]	ERVK-7	Homo sapiens (Human)	588
Q16206	ENOX2_HUMAN	reviewed	Ecto-NOX disulfide-thiol exchanger 2 (APK1 antigen) (Cytosolic ovarian carcinoma antigen 1) (Tumor-associated hydroquinone oxidase) (tNOX) [Includes: Hydroquinone [NADH] oxidase (EC 1.-.-.-); Protein disulfide-thiol oxidoreductase (EC 1.-.-.-)]	ENOX2 COVA1	Homo sapiens (Human)	610
Q15375	EPHA7_HUMAN	reviewed	Ephrin type-A receptor 7 (EC 2.7.10.1) (EPH homology kinase 3) (EHK-3) (EPH-like kinase 11) (EK11) (hEK11)	EPHA7 EHK3 HEK11	Homo sapiens (Human)	998
Q9NX77	ENK13_HUMAN	reviewed	Endogenous retrovirus group K member 13-1 Env polyprotein (Envelope polyprotein) (HERV-K_16p13.3 provirus ancestral Env polyprotein) [Cleaved into: Surface protein (SU); Transmembrane protein (TM)]	ERVK13-1	Homo sapiens (Human)	482
P61565	ENK21_HUMAN	reviewed	Endogenous retrovirus group K member 21 Env polyprotein (EnvK1 protein) (Envelope polyprotein) (HERV-K_12q14.1 provirus ancestral Env polyprotein) [Cleaved into: Surface protein (SU); Transmembrane protein (TM)]	ERVK-21	Homo sapiens (Human)	698
P22413	ENPP1_HUMAN	reviewed	Ectonucleotide pyrophosphatase/phosphodiesterase family member 1 (E-NPP 1) (Membrane component chromosome 6 surface marker 1) (Phosphodiesterase I/nucleotide pyrophosphatase 1) (Plasma-cell membrane glycoprotein PC-1) [Includes: Alkaline phosphodiesterase I (EC 3.1.4.1); Nucleotide pyrophosphatase (NPPase) (EC 3.6.1.9)]	ENPP1 M6S1 NPPS PC1 PDNP1	Homo sapiens (Human)	925
P54762	EPHB1_HUMAN	reviewed	Ephrin type-B receptor 1 (EC 2.7.10.1) (ELK) (EPH tyrosine kinase 2) (EPH-like kinase 6) (EK6) (hEK6) (Neuronally-expressed EPH-related tyrosine kinase) (NET) (Tyrosine-protein kinase receptor EPH-2)	EPHB1 ELK EPHT2 HEK6 NET	Homo sapiens (Human)	984
P54760	EPHB4_HUMAN	reviewed	Ephrin type-B receptor 4 (EC 2.7.10.1) (Hepatoma transmembrane kinase) (Tyrosine-protein kinase TYRO11)	EPHB4 HTK MYK1 TYRO11	Homo sapiens (Human)	987
P21860	ERBB3_HUMAN	reviewed	Receptor tyrosine-protein kinase erbB-3 (EC 2.7.10.1) (Proto-oncogene-like protein c-ErbB-3) (Tyrosine kinase-type cell surface receptor HER3)	ERBB3 HER3	Homo sapiens (Human)	1342
Q9BSJ8	ESYT1_HUMAN	reviewed	Extended synaptotagmin-1 (E-Syt1) (Membrane-bound C2 domain-containing protein)	ESYT1 FAM62A KIAA0747 MBC2	Homo sapiens (Human)	1104
A0FGR8	ESYT2_HUMAN	reviewed	Extended synaptotagmin-2 (E-Syt2) (Chr2Syt)	ESYT2 FAM62B KIAA1228	Homo sapiens (Human)	921
Q6PCB8	EMB_HUMAN	reviewed	Embigin	EMB	Homo sapiens (Human)	327
Q9Y6X5	ENPP4_HUMAN	reviewed	Bis(5'-adenosyl)-triphosphatase ENPP4 (EC 3.6.1.29) (AP3A hydrolase) (AP3Aase) (Ectonucleotide pyrophosphatase/phosphodiesterase family member 4) (E-NPP 4) (NPP-4)	ENPP4 KIAA0879 NPP4	Homo sapiens (Human)	453
P61550	ENVT1_HUMAN	reviewed	Endogenous retrovirus group S71 member 1 Env polyprotein (Envelope polyprotein) (HERV-T Env protein) (HERV-T_19q13.11 provirus ancestral Env polyprotein) [Includes: Surface protein (SU); Transmembrane protein (TM)]	ERVS71-1	Homo sapiens (Human)	626
P16452	EPB42_HUMAN	reviewed	Erythrocyte membrane protein band 4.2 (Erythrocyte protein 4.2) (P4.2)	EPB42 E42P	Homo sapiens (Human)	691
P21709	EPHA1_HUMAN	reviewed	Ephrin type-A receptor 1 (hEpha1) (EC 2.7.10.1) (EPH tyrosine kinase) (EPH tyrosine kinase 1) (Erythropoietin-producing hepatoma receptor) (Tyrosine-protein kinase receptor EPH)	EPHA1 EPH EPHT EPHT1	Homo sapiens (Human)	976
P54756	EPHA5_HUMAN	reviewed	Ephrin type-A receptor 5 (EC 2.7.10.1) (Brain-specific kinase) (EPH homology kinase 1) (EHK-1) (EPH-like kinase 7) (EK7) (hEK7)	EPHA5 BSK EHK1 HEK7 TYRO4	Homo sapiens (Human)	1037
P29322	EPHA8_HUMAN	reviewed	Ephrin type-A receptor 8 (EC 2.7.10.1) (EPH- and ELK-related kinase) (EPH-like kinase 3) (EK3) (hEK3) (Tyrosine-protein kinase receptor EEK)	EPHA8 EEK HEK3 KIAA1459	Homo sapiens (Human)	1005
P29323	EPHB2_HUMAN	reviewed	Ephrin type-B receptor 2 (EC 2.7.10.1) (Developmentally-regulated Eph-related tyrosine kinase) (ELK-related tyrosine kinase) (EPH tyrosine kinase 3) (EPH-like kinase 5) (EK5) (hEK5) (Renal carcinoma antigen NY-REN-47) (Tyrosine-protein kinase TYRO5) (Tyrosine-protein kinase receptor EPH-3)	EPHB2 DRT EPHT3 EPTH3 ERK HEK5 TYRO5	Homo sapiens (Human)	1055
Q9UJM3	ERRFI_HUMAN	reviewed	ERBB receptor feedback inhibitor 1 (Mitogen-inducible gene 6 protein) (MIG-6)	ERRFI1 MIG6	Homo sapiens (Human)	462
P03372	ESR1_HUMAN	reviewed	Estrogen receptor (ER) (ER-alpha) (Estradiol receptor) (Nuclear receptor subfamily 3 group A member 1)	ESR1 ESR NR3A1	Homo sapiens (Human)	595
P57679	EVC_HUMAN	reviewed	Ellis-van Creveld syndrome protein (DWF-1)	EVC	Homo sapiens (Human)	992
Q9UPT5	EXOC7_HUMAN	reviewed	Exocyst complex component 7 (Exocyst complex component Exo70)	EXOC7 EXO70 KIAA1067	Homo sapiens (Human)	735
Q8IXS8	F126B_HUMAN	reviewed	Protein FAM126B	FAM126B	Homo sapiens (Human)	530
Q8TC92	ENOX1_HUMAN	reviewed	Ecto-NOX disulfide-thiol exchanger 1 (Candidate growth-related and time keeping constitutive hydroquinone [NADH] oxidase) (cCNOX) (Cell proliferation-inducing gene 38 protein) (Constitutive Ecto-NOX) (cNOX) [Includes: Hydroquinone [NADH] oxidase (EC 1.-.-.-); Protein disulfide-thiol oxidoreductase (EC 1.-.-.-)]	ENOX1 PIG38	Homo sapiens (Human)	643
Q9Y5L3	ENTP2_HUMAN	reviewed	Ectonucleoside triphosphate diphosphohydrolase 2 (NTPDase 2) (EC 3.6.1.-) (CD39 antigen-like 1) (Ecto-ATP diphosphohydrolase 2) (Ecto-ATPDase 2) (Ecto-ATPase 2)	ENTPD2 CD39L1	Homo sapiens (Human)	495
P60509	ERB1_HUMAN	reviewed	Endogenous retrovirus group PABLB member 1 Env polyprotein (Endogenous retrovirus group PABLB member 1) (Envelope polyprotein) (HERV-R(b) Env protein) (HERV-R(b)_3p24.3 provirus ancestral Env polyprotein) [Includes: Surface protein domain (SU); Transmembrane protein domain (TM)]	ERVPABLB-1	Homo sapiens (Human)	514
Q8TBR7	FA57A_HUMAN	reviewed	Protein FAM57A (Protein CT120)	FAM57A	Homo sapiens (Human)	257
Q9Y4F9	FA65B_HUMAN	reviewed	Protein FAM65B	FAM65B C6orf32 DIFF48 KIAA0386 PL48	Homo sapiens (Human)	1068
P16422	EPCAM_HUMAN	reviewed	Epithelial cell adhesion molecule (Ep-CAM) (Adenocarcinoma-associated antigen) (Cell surface glycoprotein Trop-1) (Epithelial cell surface antigen) (Epithelial glycoprotein) (EGP) (Epithelial glycoprotein 314) (EGP314) (hEGP314) (KS 1/4 antigen) (KSA) (Major gastrointestinal tumor-associated protein GA733-2) (Tumor-associated calcium signal transducer 1) (CD antigen CD326)	EPCAM GA733-2 M1S2 M4S1 MIC18 TACSTD1 TROP1	Homo sapiens (Human)	314
P42566	EPS15_HUMAN	reviewed	Epidermal growth factor receptor substrate 15 (Protein Eps15) (Protein AF-1p)	EPS15 AF1P	Homo sapiens (Human)	896
Q15303	ERBB4_HUMAN	reviewed	Receptor tyrosine-protein kinase erbB-4 (EC 2.7.10.1) (Proto-oncogene-like protein c-ErbB-4) (Tyrosine kinase-type cell surface receptor HER4) (p180erbB4) [Cleaved into: ERBB4 intracellular domain (4ICD) (E4ICD) (s80HER4)]	ERBB4 HER4	Homo sapiens (Human)	1308
Q96PL5	ERMAP_HUMAN	reviewed	Erythroid membrane-associated protein (hERMAP) (Radin blood group antigen) (Scianna blood group antigen)	ERMAP RD SC	Homo sapiens (Human)	475
Q96AP7	ESAM_HUMAN	reviewed	Endothelial cell-selective adhesion molecule	ESAM UNQ220/PRO246	Homo sapiens (Human)	390
O60883	ETBR2_HUMAN	reviewed	Prosaposin receptor GPR37L1 (Endothelin B receptor-like protein 2) (ETBR-LP-2) (G-protein coupled receptor 37-like 1)	GPR37L1 ETBRLP2	Homo sapiens (Human)	481
Q9NZB2	F120A_HUMAN	reviewed	Constitutive coactivator of PPAR-gamma-like protein 1 (Oxidative stress-associated Src activator) (Protein FAM120A)	FAM120A C9orf10 KIAA0183 OSSA	Homo sapiens (Human)	1118
Q641Q2	FA21A_HUMAN	reviewed	WASH complex subunit FAM21A	FAM21A FAM21B	Homo sapiens (Human)	1341
Q8WWV6	FCAMR_HUMAN	reviewed	High affinity immunoglobulin alpha and immunoglobulin mu Fc receptor (Fc alpha/mu receptor) (CD antigen CD351)	FCAMR FKSG87	Homo sapiens (Human)	532
P30273	FCERG_HUMAN	reviewed	High affinity immunoglobulin epsilon receptor subunit gamma (Fc receptor gamma-chain) (FcRgamma) (Fc-epsilon RI-gamma) (IgE Fc receptor subunit gamma) (FceRI gamma)	FCER1G	Homo sapiens (Human)	86
O00602	FCN1_HUMAN	reviewed	Ficolin-1 (Collagen/fibrinogen domain-containing protein 1) (Ficolin-A) (Ficolin-alpha) (M-ficolin)	FCN1 FCNM	Homo sapiens (Human)	326
Q01844	EWS_HUMAN	reviewed	RNA-binding protein EWS (EWS oncogene) (Ewing sarcoma breakpoint region 1 protein)	EWSR1 EWS	Homo sapiens (Human)	656
P15311	EZRI_HUMAN	reviewed	Ezrin (Cytovillin) (Villin-2) (p81)	EZR VIL2	Homo sapiens (Human)	586
Q9Y4F1	FARP1_HUMAN	reviewed	FERM, RhoGEF and pleckstrin domain-containing protein 1 (Chondrocyte-derived ezrin-like protein) (Pleckstrin homology domain-containing family C member 2) (PH domain-containing family C member 2)	FARP1 CDEP PLEKHC2	Homo sapiens (Human)	1045
A1KXE4	F168B_HUMAN	reviewed	Myelin-associated neurite-outgrowth inhibitor (Mani) (p20)	FAM168B KIAA0280L MANI	Homo sapiens (Human)	195
Q9Y4E1	FA21C_HUMAN	reviewed	WASH complex subunit FAM21C (Vaccinia virus penetration factor) (VPEF)	FAM21C KIAA0592	Homo sapiens (Human)	1318
P0C2W1	FBSP1_HUMAN	reviewed	F-box/SPRY domain-containing protein 1 (F-box only protein 45) (hFbxo45)	FBXO45 FBX45	Homo sapiens (Human)	286
P31995	FCG2C_HUMAN	reviewed	Low affinity immunoglobulin gamma Fc region receptor II-c (IgG Fc receptor II-c) (CDw32) (Fc-gamma RII-c) (Fc-gamma-RIIc) (FcRII-c) (CD antigen CD32)	FCGR2C CD32 FCG2 IGFR2	Homo sapiens (Human)	323
P55899	FCGRN_HUMAN	reviewed	IgG receptor FcRn large subunit p51 (FcRn) (IgG Fc fragment receptor transporter alpha chain) (Neonatal Fc receptor)	FCGRT FCRN	Homo sapiens (Human)	365
Q96LA5	FCRL2_HUMAN	reviewed	Fc receptor-like protein 2 (FcR-like protein 2) (FcRL2) (Fc receptor homolog 2) (FcRH2) (IFGP family protein 4) (Immunoglobulin receptor translocation-associated protein 4) (SH2 domain-containing phosphatase anchor protein 1) (CD antigen CD307b)	FCRL2 FCRH2 IFGP4 IRTA4 SPAP1 UNQ9236/PRO31998	Homo sapiens (Human)	508
Q96RD9	FCRL5_HUMAN	reviewed	Fc receptor-like protein 5 (FcR-like protein 5) (FcRL5) (BXMAS1) (Fc receptor homolog 5) (FcRH5) (Immune receptor translocation-associated protein 2) (CD antigen CD307e)	FCRL5 FCRH5 IRTA2 UNQ503/PRO820	Homo sapiens (Human)	977
P09769	FGR_HUMAN	reviewed	Tyrosine-protein kinase Fgr (EC 2.7.10.2) (Gardner-Rasheed feline sarcoma viral (v-fgr) oncogene homolog) (Proto-oncogene c-Fgr) (p55-Fgr) (p58-Fgr) (p58c-Fgr)	FGR SRC2	Homo sapiens (Human)	529
Q05397	FAK1_HUMAN	reviewed	Focal adhesion kinase 1 (FADK 1) (EC 2.7.10.2) (Focal adhesion kinase-related nonkinase) (FRNK) (Protein phosphatase 1 regulatory subunit 71) (PPP1R71) (Protein-tyrosine kinase 2) (p125FAK) (pp125FAK)	PTK2 FAK FAK1	Homo sapiens (Human)	1052
P31994	FCG2B_HUMAN	reviewed	Low affinity immunoglobulin gamma Fc region receptor II-b (IgG Fc receptor II-b) (CDw32) (Fc-gamma RII-b) (Fc-gamma-RIIb) (FcRII-b) (CD antigen CD32)	FCGR2B CD32 FCG2 IGFR2	Homo sapiens (Human)	310
O75015	FCG3B_HUMAN	reviewed	Low affinity immunoglobulin gamma Fc region receptor III-B (Fc-gamma RIII-beta) (Fc-gamma RIII) (Fc-gamma RIIIb) (FcRIII) (FcRIIIb) (FcR-10) (IgG Fc receptor III-1) (CD antigen CD16b)	FCGR3B CD16B FCG3 FCGR3 IGFR3	Homo sapiens (Human)	233
Q96PJ5	FCRL4_HUMAN	reviewed	Fc receptor-like protein 4 (FcR-like protein 4) (FcRL4) (Fc receptor homolog 4) (FcRH4) (IFGP family protein 2) (hIFGP2) (Immune receptor translocation-associated protein 1) (CD antigen CD307d)	FCRL4 FCRH4 IFGP2 IRTA1	Homo sapiens (Human)	515
Q9BQL6	FERM1_HUMAN	reviewed	Fermitin family homolog 1 (Kindlerin) (Kindlin syndrome protein) (Kindlin-1) (Unc-112-related protein 1)	FERMT1 C20orf42 KIND1 URP1	Homo sapiens (Human)	677
P22607	FGFR3_HUMAN	reviewed	Fibroblast growth factor receptor 3 (FGFR-3) (EC 2.7.10.1) (CD antigen CD333)	FGFR3 JTK4	Homo sapiens (Human)	806
Q14517	FAT1_HUMAN	reviewed	Protocadherin Fat 1 (Cadherin family member 7) (Cadherin-related tumor suppressor homolog) (Protein fat homolog) [Cleaved into: Protocadherin Fat 1, nuclear form]	FAT1 CDHF7 FAT	Homo sapiens (Human)	4588
Q9NYQ8	FAT2_HUMAN	reviewed	Protocadherin Fat 2 (hFat2) (Cadherin family member 8) (Multiple epidermal growth factor-like domains protein 1) (Multiple EGF-like domains protein 1)	FAT2 CDHF8 KIAA0811 MEGF1	Homo sapiens (Human)	4349
P24071	FCAR_HUMAN	reviewed	Immunoglobulin alpha Fc receptor (IgA Fc receptor) (CD antigen CD89)	FCAR CD89	Homo sapiens (Human)	287
P12314	FCGR1_HUMAN	reviewed	High affinity immunoglobulin gamma Fc receptor I (IgG Fc receptor I) (Fc-gamma RI) (FcRI) (Fc-gamma RIA) (FcgammaRIa) (CD antigen CD64)	FCGR1A FCG1 FCGR1 IGFR1	Homo sapiens (Human)	374
Q96LA6	FCRL1_HUMAN	reviewed	Fc receptor-like protein 1 (FcR-like protein 1) (FcRL1) (Fc receptor homolog 1) (FcRH1) (IFGP family protein 1) (hIFGP1) (Immune receptor translocation-associated protein 5) (CD antigen CD307a)	FCRL1 FCRH1 IFGP1 IRTA5	Homo sapiens (Human)	429
Q96P31	FCRL3_HUMAN	reviewed	Fc receptor-like protein 3 (FcR-like protein 3) (FcRL3) (Fc receptor homolog 3) (FcRH3) (IFGP family protein 3) (hIFGP3) (Immune receptor translocation-associated protein 3) (SH2 domain-containing phosphatase anchor protein 2) (CD antigen CD307c)	FCRL3 FCRH3 IFGP3 IRTA3 SPAP2	Homo sapiens (Human)	734
Q6ZNL6	FGD5_HUMAN	reviewed	FYVE, RhoGEF and PH domain-containing protein 5 (Zinc finger FYVE domain-containing protein 23)	FGD5 ZFYVE23	Homo sapiens (Human)	1462
Q9H9S5	FKRP_HUMAN	reviewed	Fukutin-related protein (EC 2.-.-.-)	FKRP	Homo sapiens (Human)	495
Q5T0N5	FBP1L_HUMAN	reviewed	Formin-binding protein 1-like (Transducer of Cdc42-dependent actin assembly protein 1) (Toca-1)	FNBP1L C1orf39 TOCA1	Homo sapiens (Human)	605
P12318	FCG2A_HUMAN	reviewed	Low affinity immunoglobulin gamma Fc region receptor II-a (IgG Fc receptor II-a) (CDw32) (Fc-gamma RII-a) (Fc-gamma-RIIa) (FcRII-a) (CD antigen CD32)	FCGR2A CD32 FCG2 FCGR2A1 IGFR2	Homo sapiens (Human)	317
P08637	FCG3A_HUMAN	reviewed	Low affinity immunoglobulin gamma Fc region receptor III-A (CD16a antigen) (Fc-gamma RIII-alpha) (Fc-gamma RIII) (Fc-gamma RIIIa) (FcRIII) (FcRIIIa) (FcR-10) (IgG Fc receptor III-2) (CD antigen CD16a)	FCGR3A CD16A FCG3 FCGR3 IGFR3	Homo sapiens (Human)	254
Q92637	FCGRB_HUMAN	reviewed	High affinity immunoglobulin gamma Fc receptor IB (IgG Fc receptor IB) (Fc-gamma RIB) (FcRIB) (hFcgammaRIB)	FCGR1B IGFRB	Homo sapiens (Human)	280
Q14512	FGFP1_HUMAN	reviewed	Fibroblast growth factor-binding protein 1 (FGF-BP) (FGF-BP1) (FGF-binding protein 1) (FGFBP-1) (17 kDa heparin-binding growth factor-binding protein) (17 kDa HBGF-binding protein) (HBp17)	FGFBP1 FGFBP HBP17	Homo sapiens (Human)	234
Q9Y5Y0	FLVC1_HUMAN	reviewed	Feline leukemia virus subgroup C receptor-related protein 1 (Feline leukemia virus subgroup C receptor) (hFLVCR)	FLVCR1 FLVCR	Homo sapiens (Human)	555
P06734	FCER2_HUMAN	reviewed	Low affinity immunoglobulin epsilon Fc receptor (BLAST-2) (C-type lectin domain family 4 member J) (Fc-epsilon-RII) (Immunoglobulin E-binding factor) (Lymphocyte IgE receptor) (CD antigen CD23) [Cleaved into: Low affinity immunoglobulin epsilon Fc receptor membrane-bound form; Low affinity immunoglobulin epsilon Fc receptor soluble form]	FCER2 CD23A CLEC4J FCE2 IGEBF	Homo sapiens (Human)	321
P12319	FCERA_HUMAN	reviewed	High affinity immunoglobulin epsilon receptor subunit alpha (Fc-epsilon RI-alpha) (FcERI) (IgE Fc receptor subunit alpha)	FCER1A FCE1A	Homo sapiens (Human)	257
P07332	FES_HUMAN	reviewed	Tyrosine-protein kinase Fes/Fps (EC 2.7.10.2) (Feline sarcoma/Fujinami avian sarcoma oncogene homolog) (Proto-oncogene c-Fes) (Proto-oncogene c-Fps) (p93c-fes)	FES FPS	Homo sapiens (Human)	822
O15552	FFAR2_HUMAN	reviewed	Free fatty acid receptor 2 (G-protein coupled receptor 43)	FFAR2 FFA2 GPCR43 GPR43	Homo sapiens (Human)	330
Q7Z6J4	FGD2_HUMAN	reviewed	FYVE, RhoGEF and PH domain-containing protein 2 (Zinc finger FYVE domain-containing protein 4)	FGD2 ZFYVE4	Homo sapiens (Human)	655
Q14254	FLOT2_HUMAN	reviewed	Flotillin-2 (Epidermal surface antigen) (ESA) (Membrane component chromosome 17 surface marker 1)	FLOT2 ESA1 M17S1	Homo sapiens (Human)	428
Q9NZU1	FLRT1_HUMAN	reviewed	Leucine-rich repeat transmembrane protein FLRT1 (Fibronectin-like domain-containing leucine-rich transmembrane protein 1)	FLRT1 UNQ752/PRO1483	Homo sapiens (Human)	646
Q9NZU0	FLRT3_HUMAN	reviewed	Leucine-rich repeat transmembrane protein FLRT3 (Fibronectin-like domain-containing leucine-rich transmembrane protein 3)	FLRT3 KIAA1469 UNQ856/PRO1865	Homo sapiens (Human)	649
A6NKC4	FCGRC_HUMAN	reviewed	Putative high affinity immunoglobulin gamma Fc receptor IC (IgG Fc receptor IC) (Fc-gamma RIC) (FcRIC) (hFcgammaRIC)	FCGR1C IGFRC	Homo sapiens (Human)	280
Q5NUL3	FFAR4_HUMAN	reviewed	Free fatty acid receptor 4 (G-protein coupled receptor 120) (G-protein coupled receptor 129) (G-protein coupled receptor GT01) (G-protein coupled receptor PGR4) (Omega-3 fatty acid receptor 1)	FFAR4 GPR120 GPR129 O3FAR1 PGR4	Homo sapiens (Human)	377
O75955	FLOT1_HUMAN	reviewed	Flotillin-1	FLOT1	Homo sapiens (Human)	427
Q96AC1	FERM2_HUMAN	reviewed	Fermitin family homolog 2 (Kindlin-2) (Mitogen-inducible gene 2 protein) (MIG-2) (Pleckstrin homology domain-containing family C member 1) (PH domain-containing family C member 1)	FERMT2 KIND2 MIG2 PLEKHC1	Homo sapiens (Human)	680
P16591	FER_HUMAN	reviewed	Tyrosine-protein kinase Fer (EC 2.7.10.2) (Feline encephalitis virus-related kinase FER) (Fujinami poultry sarcoma/Feline sarcoma-related protein Fer) (Proto-oncogene c-Fer) (Tyrosine kinase 3) (p94-Fer)	FER TYK3	Homo sapiens (Human)	822
Q99689	FEZ1_HUMAN	reviewed	Fasciculation and elongation protein zeta-1 (Zygin I) (Zygin-1)	FEZ1	Homo sapiens (Human)	392
O14842	FFAR1_HUMAN	reviewed	Free fatty acid receptor 1 (G-protein coupled receptor 40)	FFAR1 GPR40	Homo sapiens (Human)	300
O14843	FFAR3_HUMAN	reviewed	Free fatty acid receptor 3 (G-protein coupled receptor 41)	FFAR3 GPR41	Homo sapiens (Human)	346
Q68DA7	FMN1_HUMAN	reviewed	Formin-1 (Limb deformity protein homolog)	FMN1 FMN LD	Homo sapiens (Human)	1419
O95466	FMNL1_HUMAN	reviewed	Formin-like protein 1 (CLL-associated antigen KW-13) (Leukocyte formin)	FMNL1 C17orf1 C17orf1B FMNL FRL1	Homo sapiens (Human)	1100
Q8IVF7	FMNL3_HUMAN	reviewed	Formin-like protein 3 (Formin homology 2 domain-containing protein 3) (WW domain-binding protein 3) (WBP-3)	FMNL3 FHOD3 FRL2 KIAA2014 WBP3	Homo sapiens (Human)	1028
Q04609	FOLH1_HUMAN	reviewed	Glutamate carboxypeptidase 2 (EC 3.4.17.21) (Cell growth-inhibiting gene 27 protein) (Folate hydrolase 1) (Folylpoly-gamma-glutamate carboxypeptidase) (FGCP) (Glutamate carboxypeptidase II) (GCPII) (Membrane glutamate carboxypeptidase) (mGCP) (N-acetylated-alpha-linked acidic dipeptidase I) (NAALADase I) (Prostate-specific membrane antigen) (PSM) (PSMA) (Pteroylpoly-gamma-glutamate carboxypeptida…	FOLH1 FOLH NAALAD1 PSM PSMA GIG27	Homo sapiens (Human)	750
Q5SZK8	FREM2_HUMAN	reviewed	FRAS1-related extracellular matrix protein 2 (ECM3 homolog)	FREM2	Homo sapiens (Human)	3169
Q5SYB0	FRPD1_HUMAN	reviewed	FERM and PDZ domain-containing protein 1 (FERM domain-containing protein 2)	FRMPD1 FRMD2 KIAA0967	Homo sapiens (Human)	1578
Q8NGA4	G32P1_HUMAN	reviewed	Putative G-protein coupled receptor GPR32P1 (G-protein coupled 32 pseudogene) (G-protein coupled 32 pseudogene 1) (G-protein coupled receptor GPCR39) (hGPCR39)	GPR32P1	Homo sapiens (Human)	272
P22455	FGFR4_HUMAN	reviewed	Fibroblast growth factor receptor 4 (FGFR-4) (EC 2.7.10.1) (CD antigen CD334)	FGFR4 JTK2 TKF	Homo sapiens (Human)	802
Q5VTH2	FLTOP_HUMAN	reviewed	Protein Flattop (Cilia- and flagella-associated protein 126)	CFAP126 C1orf192 FLTP	Homo sapiens (Human)	177
Q96NE9	FRMD6_HUMAN	reviewed	FERM domain-containing protein 6 (Willin)	FRMD6 C14orf31	Homo sapiens (Human)	622
Q13283	G3BP1_HUMAN	reviewed	Ras GTPase-activating protein-binding protein 1 (G3BP-1) (EC 3.6.4.12) (EC 3.6.4.13) (ATP-dependent DNA helicase VIII) (hDH VIII) (GAP SH3 domain-binding protein 1)	G3BP1 G3BP	Homo sapiens (Human)	466
O95866	G6B_HUMAN	reviewed	Protein G6b	G6B C6orf25	Homo sapiens (Human)	241
P62684	GA113_HUMAN	reviewed	Endogenous retrovirus group K member 113 Gag polyprotein (HERV-K113 Gag protein) (HERV-K_19p13.11 provirus ancestral Gag polyprotein) (Gag polyprotein)	HERVK_113	Homo sapiens (Human)	666
Q9UBS5	GABR1_HUMAN	reviewed	Gamma-aminobutyric acid type B receptor subunit 1 (GABA-B receptor 1) (GABA-B-R1) (GABA-BR1) (GABABR1) (Gb1)	GABBR1 GPRC3A	Homo sapiens (Human)	961
P49771	FLT3L_HUMAN	reviewed	Fms-related tyrosine kinase 3 ligand (Flt3 ligand) (Flt3L) (SL cytokine)	FLT3LG	Homo sapiens (Human)	235
P14207	FOLR2_HUMAN	reviewed	Folate receptor beta (FR-beta) (Folate receptor 2) (Folate receptor, fetal/placental) (Placental folate-binding protein) (FBP)	FOLR2	Homo sapiens (Human)	255
P25090	FPR2_HUMAN	reviewed	N-formyl peptide receptor 2 (FMLP-related receptor I) (FMLP-R-I) (Formyl peptide receptor-like 1) (HM63) (Lipoxin A4 receptor) (LXA4 receptor) (RFP)	FPR2 FPRH1 FPRL1 LXA4R	Homo sapiens (Human)	351
A0AVI2	FR1L5_HUMAN	reviewed	Fer-1-like protein 5	FER1L5	Homo sapiens (Human)	2093
Q9P0K9	FRS1L_HUMAN	reviewed	DOMON domain-containing protein FRRS1L (Brain protein CG-6) (Ferric-chelate reductase 1-like protein)	FRRS1L C9orf4	Homo sapiens (Human)	344
Q9UP38	FZD1_HUMAN	reviewed	Frizzled-1 (Fz-1) (hFz1) (FzE1)	FZD1	Homo sapiens (Human)	647
Q9ULV1	FZD4_HUMAN	reviewed	Frizzled-4 (Fz-4) (hFz4) (FzE4) (CD antigen CD344)	FZD4	Homo sapiens (Human)	537
Q13467	FZD5_HUMAN	reviewed	Frizzled-5 (Fz-5) (hFz5) (FzE5)	FZD5 C2orf31	Homo sapiens (Human)	585
Q9YNA8	GAK19_HUMAN	reviewed	Endogenous retrovirus group K member 19 Gag polyprotein (HERV-K(C19) Gag protein) (HERV-K_19q11 provirus ancestral Gag polyprotein) (Gag polyprotein)	ERVK-19	Homo sapiens (Human)	666
P15328	FOLR1_HUMAN	reviewed	Folate receptor alpha (FR-alpha) (Adult folate-binding protein) (FBP) (Folate receptor 1) (Folate receptor, adult) (KB cells FBP) (Ovarian tumor-associated antigen MOv18)	FOLR1 FOLR	Homo sapiens (Human)	257
Q68DX3	FRPD2_HUMAN	reviewed	FERM and PDZ domain-containing protein 2 (PDZ domain-containing protein 4) (PDZ domain-containing protein 5C)	FRMPD2 PDZD5C PDZK4 PDZK5C	Homo sapiens (Human)	1309
Q9ULW2	FZD10_HUMAN	reviewed	Frizzled-10 (Fz-10) (hFz10) (FzE7) (CD antigen CD350)	FZD10	Homo sapiens (Human)	581
Q9H461	FZD8_HUMAN	reviewed	Frizzled-8 (Fz-8) (hFz8)	FZD8	Homo sapiens (Human)	694
P63145	GAK24_HUMAN	reviewed	Endogenous retrovirus group K member 24 Gag polyprotein (HERV-K101 Gag protein) (HERV-K_22q11.21 provirus ancestral Gag polyprotein) (Gag polyprotein)	ERVK-24	Homo sapiens (Human)	666
P32239	GASR_HUMAN	reviewed	Gastrin/cholecystokinin type B receptor (CCK-B receptor) (CCK-BR) (Cholecystokinin-2 receptor) (CCK2-R)	CCKBR CCKRB	Homo sapiens (Human)	447
O43155	FLRT2_HUMAN	reviewed	Leucine-rich repeat transmembrane protein FLRT2 (Fibronectin-like domain-containing leucine-rich transmembrane protein 2)	FLRT2 KIAA0405 UNQ232/PRO265	Homo sapiens (Human)	660
Q9UPI3	FLVC2_HUMAN	reviewed	Feline leukemia virus subgroup C receptor-related protein 2 (Calcium-chelate transporter) (CCT)	FLVCR2 C14orf58	Homo sapiens (Human)	526
Q9NZ56	FMN2_HUMAN	reviewed	Formin-2	FMN2	Homo sapiens (Human)	1722
Q96RU3	FNBP1_HUMAN	reviewed	Formin-binding protein 1 (Formin-binding protein 17) (hFBP17)	FNBP1 FBP17 KIAA0554	Homo sapiens (Human)	617
Q8NAU1	FNDC5_HUMAN	reviewed	Fibronectin type III domain-containing protein 5 (Fibronectin type III repeat-containing protein 2) [Cleaved into: Irisin]	FNDC5 FRCP2	Homo sapiens (Human)	212
P21462	FPR1_HUMAN	reviewed	fMet-Leu-Phe receptor (fMLP receptor) (N-formyl peptide receptor) (FPR) (N-formylpeptide chemoattractant receptor)	FPR1	Homo sapiens (Human)	350
P25089	FPR3_HUMAN	reviewed	N-formyl peptide receptor 3 (FMLP-related receptor II) (FMLP-R-II) (Formyl peptide receptor-like 2)	FPR3 FPRH1 FPRL2	Homo sapiens (Human)	353
Q86XX4	FRAS1_HUMAN	reviewed	Extracellular matrix protein FRAS1	FRAS1 KIAA1500	Homo sapiens (Human)	4008
P09958	FURIN_HUMAN	reviewed	Furin (EC 3.4.21.75) (Dibasic-processing enzyme) (Paired basic amino acid residue-cleaving enzyme) (PACE)	FURIN FUR PACE PCSK3	Homo sapiens (Human)	794
O00144	FZD9_HUMAN	reviewed	Frizzled-9 (Fz-9) (hFz9) (FzE6) (CD antigen CD349)	FZD9 FZD3	Homo sapiens (Human)	591
O75899	GABR2_HUMAN	reviewed	Gamma-aminobutyric acid type B receptor subunit 2 (GABA-B receptor 2) (GABA-B-R2) (GABA-BR2) (GABABR2) (Gb2) (G-protein coupled receptor 51) (HG20)	GABBR2 GPR51 GPRC3B	Homo sapiens (Human)	941
Q9HDB9	GAK5_HUMAN	reviewed	Endogenous retrovirus group K member 5 Gag polyprotein (HERV-K(II) Gag protein) (HERV-K_3q12.3 provirus ancestral Gag polyprotein) (Gag polyprotein)	ERVK-5 ERVK5	Homo sapiens (Human)	667
P63126	GAK9_HUMAN	reviewed	Endogenous retrovirus group K member 9 Gag polyprotein (HERV-K(C6) Gag protein) (HERV-K109 Gag protein) (HERV-K_6q14.1 provirus ancestral Gag polyprotein) (Gag polyprotein)	ERVK-9	Homo sapiens (Human)	666
Q8N292	GAPT_HUMAN	reviewed	Protein GAPT (Growth factor receptor-bound protein 2-binding adapter protein, transmembrane)	GAPT C5orf29	Homo sapiens (Human)	157
P61952	GBG11_HUMAN	reviewed	Guanine nucleotide-binding protein G(I)/G(S)/G(O) subunit gamma-11	GNG11 GNGT11	Homo sapiens (Human)	73
P14867	GBRA1_HUMAN	reviewed	Gamma-aminobutyric acid receptor subunit alpha-1 (GABA(A) receptor subunit alpha-1)	GABRA1	Homo sapiens (Human)	456
P47869	GBRA2_HUMAN	reviewed	Gamma-aminobutyric acid receptor subunit alpha-2 (GABA(A) receptor subunit alpha-2)	GABRA2	Homo sapiens (Human)	451
P31644	GBRA5_HUMAN	reviewed	Gamma-aminobutyric acid receptor subunit alpha-5 (GABA(A) receptor subunit alpha-5)	GABRA5	Homo sapiens (Human)	462
Q16445	GBRA6_HUMAN	reviewed	Gamma-aminobutyric acid receptor subunit alpha-6 (GABA(A) receptor subunit alpha-6)	GABRA6	Homo sapiens (Human)	453
Q8N1C3	GBRG1_HUMAN	reviewed	Gamma-aminobutyric acid receptor subunit gamma-1 (GABA(A) receptor subunit gamma-1)	GABRG1	Homo sapiens (Human)	465
Q14332	FZD2_HUMAN	reviewed	Frizzled-2 (Fz-2) (hFz2) (FzE2)	FZD2	Homo sapiens (Human)	565
Q9NPG1	FZD3_HUMAN	reviewed	Frizzled-3 (Fz-3) (hFz3)	FZD3	Homo sapiens (Human)	666
O60353	FZD6_HUMAN	reviewed	Frizzled-6 (Fz-6) (hFz6)	FZD6	Homo sapiens (Human)	706
O75084	FZD7_HUMAN	reviewed	Frizzled-7 (Fz-7) (hFz7) (FzE3)	FZD7	Homo sapiens (Human)	574
Q7LDI9	GAK6_HUMAN	reviewed	Endogenous retrovirus group K member 6 Gag polyprotein (HERV-K(C7) Gag protein) (HERV-K(HML-2.HOM) Gag protein) (HERV-K108 Gag protein) (HERV-K_7p22.1 provirus ancestral Gag polyprotein) (Gag polyprotein)	ERVK-6 ERVK6	Homo sapiens (Human)	666
P54826	GAS1_HUMAN	reviewed	Growth arrest-specific protein 1 (GAS-1)	GAS1	Homo sapiens (Human)	345
P63215	GBG3_HUMAN	reviewed	Guanine nucleotide-binding protein G(I)/G(S)/G(O) subunit gamma-3	GNG3 GNGT3	Homo sapiens (Human)	75
P63218	GBG5_HUMAN	reviewed	Guanine nucleotide-binding protein G(I)/G(S)/G(O) subunit gamma-5	GNG5 GNGT5	Homo sapiens (Human)	68
Q9NZC3	GDE1_HUMAN	reviewed	Glycerophosphodiester phosphodiesterase 1 (EC 3.1.4.44) (Membrane-interacting protein of RGS16) (RGS16-interacting membrane protein)	GDE1 MIR16	Homo sapiens (Human)	331
O95876	FRITZ_HUMAN	reviewed	WD repeat-containing and planar cell polarity effector protein fritz homolog (hFRTZ) (Bardet-Biedl syndrome 15 protein) (WD repeat-containing and planar cell polarity effector protein)	WDPCP BBS15 C2orf86 FRITZ	Homo sapiens (Human)	746
P23945	FSHR_HUMAN	reviewed	Follicle-stimulating hormone receptor (FSH-R) (Follitropin receptor)	FSHR LGR1	Homo sapiens (Human)	695
Q9UQC2	GAB2_HUMAN	reviewed	GRB2-associated-binding protein 2 (GRB2-associated binder 2) (Growth factor receptor bound protein 2-associated protein 2) (pp100)	GAB2 KIAA0571	Homo sapiens (Human)	676
P47211	GALR1_HUMAN	reviewed	Galanin receptor type 1 (GAL1-R) (GALR-1)	GALR1 GALNR GALNR1	Homo sapiens (Human)	349
O60755	GALR3_HUMAN	reviewed	Galanin receptor type 3 (GAL3-R) (GALR-3)	GALR3 GALNR3	Homo sapiens (Human)	368
P59768	GBG2_HUMAN	reviewed	Guanine nucleotide-binding protein G(I)/G(S)/G(O) subunit gamma-2 (G gamma-I)	GNG2	Homo sapiens (Human)	71
Q9UK08	GBG8_HUMAN	reviewed	Guanine nucleotide-binding protein G(I)/G(S)/G(O) subunit gamma-8 (Gamma-9)	GNG8 GNG9 GNGT9	Homo sapiens (Human)	70
P78334	GBRE_HUMAN	reviewed	Gamma-aminobutyric acid receptor subunit epsilon (GABA(A) receptor subunit epsilon)	GABRE	Homo sapiens (Human)	506
P24046	GBRR1_HUMAN	reviewed	Gamma-aminobutyric acid receptor subunit rho-1 (GABA(A) receptor subunit rho-1) (GABA(C) receptor)	GABRR1	Homo sapiens (Human)	479
O00451	GFRA2_HUMAN	reviewed	GDNF family receptor alpha-2 (GDNF receptor alpha-2) (GDNFR-alpha-2) (GFR-alpha-2) (GDNF receptor beta) (GDNFR-beta) (Neurturin receptor alpha) (NRTNR-alpha) (NTNR-alpha) (RET ligand 2) (TGF-beta-related neurotrophic factor receptor 2)	GFRA2 GDNFRB RETL2 TRNR2	Homo sapiens (Human)	464
O60609	GFRA3_HUMAN	reviewed	GDNF family receptor alpha-3 (GDNF receptor alpha-3) (GDNFR-alpha-3) (GFR-alpha-3)	GFRA3 UNQ339/PRO538/PRO3664	Homo sapiens (Human)	400
P06241	FYN_HUMAN	reviewed	Tyrosine-protein kinase Fyn (EC 2.7.10.2) (Proto-oncogene Syn) (Proto-oncogene c-Fyn) (Src-like kinase) (SLK) (p59-Fyn)	FYN	Homo sapiens (Human)	537
P62683	GAK21_HUMAN	reviewed	Endogenous retrovirus group K member 21 Gag polyprotein (HERV-K_12q14.1 provirus ancestral Gag polyprotein) (Gag polyprotein)	ERVK-21	Homo sapiens (Human)	666
P63130	GAK7_HUMAN	reviewed	Endogenous retrovirus group K member 7 Gag polyprotein (HERV-K(III) Gag protein) (HERV-K102 Gag protein) (HERV-K_1q22 provirus ancestral Gag polyprotein) (Gag polyprotein)	ERVK-7	Homo sapiens (Human)	666
P50151	GBG10_HUMAN	reviewed	Guanine nucleotide-binding protein G(I)/G(S)/G(O) subunit gamma-10	GNG10 GNGT10	Homo sapiens (Human)	68
Q9P2W3	GBG13_HUMAN	reviewed	Guanine nucleotide-binding protein G(I)/G(S)/G(O) subunit gamma-13	GNG13	Homo sapiens (Human)	67
P63211	GBG1_HUMAN	reviewed	Guanine nucleotide-binding protein G(T) subunit gamma-T1 (Transducin gamma chain)	GNGT1	Homo sapiens (Human)	74
P28472	GBRB3_HUMAN	reviewed	Gamma-aminobutyric acid receptor subunit beta-3 (GABA(A) receptor subunit beta-3)	GABRB3	Homo sapiens (Human)	473
A8MPY1	GBRR3_HUMAN	reviewed	Gamma-aminobutyric acid receptor subunit rho-3 (GABA(A) receptor subunit rho-3) (GABA(C) receptor)	GABRR3	Homo sapiens (Human)	467
P87889	GAK10_HUMAN	reviewed	Endogenous retrovirus group K member 10 Gag polyprotein (HERV-K10 Gag protein) (HERV-K107 Gag protein) (HERV-K_5q33.3 provirus ancestral Gag polyprotein) (Gag polyprotein)	ERVK-10	Homo sapiens (Human)	666
P62685	GAK8_HUMAN	reviewed	Endogenous retrovirus group K member 8 Gag polyprotein (HERV-K115 Gag protein) (HERV-K_8p23.1 provirus ancestral Gag polyprotein) (Gag polyprotein)	ERVK-8	Homo sapiens (Human)	647
O60262	GBG7_HUMAN	reviewed	Guanine nucleotide-binding protein G(I)/G(S)/G(O) subunit gamma-7	GNG7 GNGT7	Homo sapiens (Human)	68
P43026	GDF5_HUMAN	reviewed	Growth/differentiation factor 5 (GDF-5) (Bone morphogenetic protein 14) (BMP-14) (Cartilage-derived morphogenetic protein 1) (CDMP-1) (Lipopolysaccharide-associated protein 4) (LAP-4) (LPS-associated protein 4) (Radotermin)	GDF5 BMP14 CDMP1	Homo sapiens (Human)	501
Q9HCC8	GDPD2_HUMAN	reviewed	Glycerophosphoinositol inositolphosphodiesterase GDPD2 (EC 3.1.4.43) (Glycerophosphodiester phosphodiesterase 3) (Glycerophosphodiester phosphodiesterase domain-containing protein 2) (Osteoblast differentiation promoting factor)	GDPD2 GDE3 OBDPF UNQ1935/PRO4418	Homo sapiens (Human)	539
Q9NQX3	GEPH_HUMAN	reviewed	Gephyrin [Includes: Molybdopterin adenylyltransferase (MPT adenylyltransferase) (EC 2.7.7.75) (Domain G); Molybdopterin molybdenumtransferase (MPT Mo-transferase) (EC 2.10.1.1) (Domain E)]	GPHN GPH KIAA1385	Homo sapiens (Human)	736
Q9GZZ7	GFRA4_HUMAN	reviewed	GDNF family receptor alpha-4 (GDNF receptor alpha-4) (GDNFR-alpha-4) (GFR-alpha-4) (Persephin receptor)	GFRA4	Homo sapiens (Human)	299
P50150	GBG4_HUMAN	reviewed	Guanine nucleotide-binding protein G(I)/G(S)/G(O) subunit gamma-4	GNG4 GNGT4	Homo sapiens (Human)	75
O14610	GBGT2_HUMAN	reviewed	Guanine nucleotide-binding protein G(I)/G(S)/G(O) subunit gamma-T2 (G gamma-C) (G-gamma-8) (G-gamma-9) (Guanine nucleotide binding protein gamma transducing activity polypeptide 2)	GNGT2 GNG8 GNG9 GNGT8	Homo sapiens (Human)	69
P18505	GBRB1_HUMAN	reviewed	Gamma-aminobutyric acid receptor subunit beta-1 (GABA(A) receptor subunit beta-1)	GABRB1	Homo sapiens (Human)	474
O00591	GBRP_HUMAN	reviewed	Gamma-aminobutyric acid receptor subunit pi (GABA(A) receptor subunit pi)	GABRP	Homo sapiens (Human)	440
P28476	GBRR2_HUMAN	reviewed	Gamma-aminobutyric acid receptor subunit rho-2 (GABA(A) receptor subunit rho-2) (GABA(C) receptor)	GABRR2	Homo sapiens (Human)	465
Q8N6F7	GCSAM_HUMAN	reviewed	Germinal center-associated signaling and motility protein (Germinal center B-cell-expressed transcript 2 protein) (Germinal center-associated lymphoma protein) (hGAL)	GCSAM GAL GCET2	Homo sapiens (Human)	178
P55040	GEM_HUMAN	reviewed	GTP-binding protein GEM (GTP-binding mitogen-induced T-cell protein) (RAS-like protein KIR)	GEM KIR	Homo sapiens (Human)	296
O43603	GALR2_HUMAN	reviewed	Galanin receptor type 2 (GAL2-R) (GALR-2)	GALR2 GALNR2	Homo sapiens (Human)	387
Q9UBI6	GBG12_HUMAN	reviewed	Guanine nucleotide-binding protein G(I)/G(S)/G(O) subunit gamma-12	GNG12	Homo sapiens (Human)	72
P32455	GBP1_HUMAN	reviewed	Guanylate-binding protein 1 (EC 3.6.5.-) (GTP-binding protein 1) (GBP-1) (HuGBP-1) (Guanine nucleotide-binding protein 1) (Interferon-induced guanylate-binding protein 1)	GBP1	Homo sapiens (Human)	592
P34903	GBRA3_HUMAN	reviewed	Gamma-aminobutyric acid receptor subunit alpha-3 (GABA(A) receptor subunit alpha-3)	GABRA3	Homo sapiens (Human)	492
P48169	GBRA4_HUMAN	reviewed	Gamma-aminobutyric acid receptor subunit alpha-4 (GABA(A) receptor subunit alpha-4)	GABRA4	Homo sapiens (Human)	554
P47870	GBRB2_HUMAN	reviewed	Gamma-aminobutyric acid receptor subunit beta-2 (GABA(A) receptor subunit beta-2)	GABRB2	Homo sapiens (Human)	512
O14764	GBRD_HUMAN	reviewed	Gamma-aminobutyric acid receptor subunit delta (GABA(A) receptor subunit delta)	GABRD	Homo sapiens (Human)	452
P18507	GBRG2_HUMAN	reviewed	Gamma-aminobutyric acid receptor subunit gamma-2 (GABA(A) receptor subunit gamma-2)	GABRG2	Homo sapiens (Human)	467
Q99928	GBRG3_HUMAN	reviewed	Gamma-aminobutyric acid receptor subunit gamma-3 (GABA(A) receptor subunit gamma-3)	GABRG3	Homo sapiens (Human)	467
Q9UN88	GBRT_HUMAN	reviewed	Gamma-aminobutyric acid receptor subunit theta (GABA(A) receptor subunit theta)	GABRQ	Homo sapiens (Human)	632
P56159	GFRA1_HUMAN	reviewed	GDNF family receptor alpha-1 (GDNF receptor alpha-1) (GDNFR-alpha-1) (GFR-alpha-1) (RET ligand 1) (TGF-beta-related neurotrophic factor receptor 1)	GFRA1 GDNFRA RETL1 TRNR1	Homo sapiens (Human)	465
P19440	GGT1_HUMAN	reviewed	Gamma-glutamyltranspeptidase 1 (GGT 1) (EC 2.3.2.2) (Gamma-glutamyltransferase 1) (Glutathione hydrolase 1) (EC 3.4.19.13) (Leukotriene-C4 hydrolase) (EC 3.4.19.14) (CD antigen CD224) [Cleaved into: Gamma-glutamyltranspeptidase 1 heavy chain; Gamma-glutamyltranspeptidase 1 light chain]	GGT1 GGT	Homo sapiens (Human)	569
P23416	GLRA2_HUMAN	reviewed	Glycine receptor subunit alpha-2	GLRA2	Homo sapiens (Human)	452
P47871	GLR_HUMAN	reviewed	Glucagon receptor (GL-R)	GCGR	Homo sapiens (Human)	477
Q02643	GHRHR_HUMAN	reviewed	Growth hormone-releasing hormone receptor (GHRH receptor) (Growth hormone-releasing factor receptor) (GRF receptor) (GRFR)	GHRHR	Homo sapiens (Human)	423
P06028	GLPB_HUMAN	reviewed	Glycophorin-B (PAS-3) (SS-active sialoglycoprotein) (Sialoglycoprotein delta) (CD antigen CD235b)	GYPB GPB	Homo sapiens (Human)	91
P10912	GHR_HUMAN	reviewed	Growth hormone receptor (GH receptor) (Somatotropin receptor) [Cleaved into: Growth hormone-binding protein (GH-binding protein) (GHBP) (Serum-binding protein)]	GHR	Homo sapiens (Human)	638
Q92847	GHSR_HUMAN	reviewed	Growth hormone secretagogue receptor type 1 (GHS-R) (GH-releasing peptide receptor) (GHRP) (Ghrelin receptor)	GHSR	Homo sapiens (Human)	366
Q6ZMI3	GLDN_HUMAN	reviewed	Gliomedin [Cleaved into: Gliomedin shedded ectodomain]	GLDN COLM UNQ9339/PRO34011	Homo sapiens (Human)	551
P04921	GLPC_HUMAN	reviewed	Glycophorin-C (Glycoconnectin) (Glycophorin-D) (GPD) (Glycoprotein beta) (PAS-2') (Sialoglycoprotein D) (CD antigen CD236)	GYPC GLPC GPC	Homo sapiens (Human)	128
O75311	GLRA3_HUMAN	reviewed	Glycine receptor subunit alpha-3	GLRA3	Homo sapiens (Human)	464
Q5JXX5	GLRA4_HUMAN	reviewed	Glycine receptor subunit alpha-4	GLRA4	Homo sapiens (Human)	417
Q99445	GML_HUMAN	reviewed	Glycosyl-phosphatidylinositol-anchored molecule-like protein	GML LY6DL	Homo sapiens (Human)	158
P04899	GNAI2_HUMAN	reviewed	Guanine nucleotide-binding protein G(i) subunit alpha-2 (Adenylate cyclase-inhibiting G alpha protein)	GNAI2 GNAI2B	Homo sapiens (Human)	355
Q86SQ4	GP126_HUMAN	reviewed	G-protein coupled receptor 126 (Developmentally regulated G-protein-coupled receptor) (Vascular inducible G protein-coupled receptor)	GPR126 DREG VIGR	Homo sapiens (Human)	1221
Q6DWJ6	GP139_HUMAN	reviewed	Probable G-protein coupled receptor 139 (G(q)-coupled orphan receptor GPRg1) (G-protein-coupled receptor PGR3)	GPR139 GPRG1 PGR3	Homo sapiens (Human)	353
Q7Z602	GP141_HUMAN	reviewed	Probable G-protein coupled receptor 141 (G-protein coupled receptor PGR13)	GPR141 PGR13	Homo sapiens (Human)	305
Q96CH1	GP146_HUMAN	reviewed	Probable G-protein coupled receptor 146 (G-protein coupled receptor PGR8)	GPR146 PGR8	Homo sapiens (Human)	333
Q8TDV2	GP148_HUMAN	reviewed	Probable G-protein coupled receptor 148 (Brain and testis restricted GPCR) (G-protein coupled receptor PGR6)	GPR148 BTR PGR6	Homo sapiens (Human)	347
Q8TDT2	GP152_HUMAN	reviewed	Probable G-protein coupled receptor 152 (G-protein coupled receptor PGR5)	GPR152 PGR5	Homo sapiens (Human)	470
Q6NV75	GP153_HUMAN	reviewed	Probable G-protein coupled receptor 153 (G-protein coupled receptor PGR1)	GPR153 PGR1	Homo sapiens (Human)	609
Q8N6U8	GP161_HUMAN	reviewed	G-protein coupled receptor 161 (G-protein coupled receptor RE2)	GPR161	Homo sapiens (Human)	529
P32249	GP183_HUMAN	reviewed	G-protein coupled receptor 183 (Epstein-Barr virus-induced G-protein coupled receptor 2) (EBI2) (EBV-induced G-protein coupled receptor 2)	GPR183 EBI2	Homo sapiens (Human)	361
Q9NZH0	GPC5B_HUMAN	reviewed	G-protein coupled receptor family C group 5 member B (A-69G12.1) (Retinoic acid-induced gene 2 protein) (RAIG-2)	GPRC5B RAIG2	Homo sapiens (Human)	403
P02724	GLPA_HUMAN	reviewed	Glycophorin-A (MN sialoglycoprotein) (PAS-2) (Sialoglycoprotein alpha) (CD antigen CD235a)	GYPA GPA	Homo sapiens (Human)	150
P63096	GNAI1_HUMAN	reviewed	Guanine nucleotide-binding protein G(i) subunit alpha-1 (Adenylate cyclase-inhibiting G alpha protein)	GNAI1	Homo sapiens (Human)	354
P09471	GNAO_HUMAN	reviewed	Guanine nucleotide-binding protein G(o) subunit alpha	GNAO1	Homo sapiens (Human)	354
P30968	GNRHR_HUMAN	reviewed	Gonadotropin-releasing hormone receptor (GnRH receptor) (GnRH-R)	GNRHR GRHR	Homo sapiens (Human)	328
Q5T848	GP158_HUMAN	reviewed	Probable G-protein coupled receptor 158	GPR158 KIAA1136	Homo sapiens (Human)	1215
P48546	GIPR_HUMAN	reviewed	Gastric inhibitory polypeptide receptor (GIP-R) (Glucose-dependent insulinotropic polypeptide receptor)	GIPR	Homo sapiens (Human)	466
P23415	GLRA1_HUMAN	reviewed	Glycine receptor subunit alpha-1 (Glycine receptor 48 kDa subunit) (Glycine receptor strychnine-binding subunit)	GLRA1	Homo sapiens (Human)	457
Q8TDV0	GP151_HUMAN	reviewed	Probable G-protein coupled receptor 151 (G-protein coupled receptor PGR7) (GPCR-2037)	GPR151 PGR7	Homo sapiens (Human)	419
Q8NFN8	GP156_HUMAN	reviewed	Probable G-protein coupled receptor 156 (G-protein coupled receptor PGR28) (GABAB-related G-protein coupled receptor)	GPR156 GABABL PGR28	Homo sapiens (Human)	814
Q5UAW9	GP157_HUMAN	reviewed	Probable G-protein coupled receptor 157	GPR157	Homo sapiens (Human)	335
Q9UJ42	GP160_HUMAN	reviewed	Probable G-protein coupled receptor 160 (G-protein coupled receptor GPCR1) (hGPCR1)	GPR160 GPCR150	Homo sapiens (Human)	338
P78333	GPC5_HUMAN	reviewed	Glypican-5 [Cleaved into: Secreted glypican-5]	GPC5	Homo sapiens (Human)	572
Q8NDV2	GPR26_HUMAN	reviewed	G-protein coupled receptor 26	GPR26	Homo sapiens (Human)	337
P46091	GPR1_HUMAN	reviewed	G-protein coupled receptor 1	GPR1	Homo sapiens (Human)	355
Q9HC97	GPR35_HUMAN	reviewed	G-protein coupled receptor 35 (Kynurenic acid receptor) (KYNA receptor)	GPR35	Homo sapiens (Human)	309
Q9Y5Y3	GPR45_HUMAN	reviewed	Probable G-protein coupled receptor 45 (PSP24-1) (PSP24-alpha)	GPR45	Homo sapiens (Human)	372
Q9BZJ6	GPR63_HUMAN	reviewed	Probable G-protein coupled receptor 63 (PSP24-2) (PSP24-beta)	GPR63 PSP24B	Homo sapiens (Human)	419
Q86YR5	GPSM1_HUMAN	reviewed	G-protein-signaling modulator 1 (Activator of G-protein signaling 3)	GPSM1 AGS3	Homo sapiens (Human)	675
P43220	GLP1R_HUMAN	reviewed	Glucagon-like peptide 1 receptor (GLP-1 receptor) (GLP-1-R) (GLP-1R)	GLP1R	Homo sapiens (Human)	463
P48167	GLRB_HUMAN	reviewed	Glycine receptor subunit beta (Glycine receptor 58 kDa subunit)	GLRB	Homo sapiens (Human)	497
P08754	GNAI3_HUMAN	reviewed	Guanine nucleotide-binding protein G(k) subunit alpha (G(i) alpha-3)	GNAI3	Homo sapiens (Human)	354
Q86SP6	GP149_HUMAN	reviewed	Probable G-protein coupled receptor 149 (G-protein coupled receptor PGR10)	GPR149 PGR10	Homo sapiens (Human)	731
Q16538	GP162_HUMAN	reviewed	Probable G-protein coupled receptor 162 (Gene-rich cluster gene A protein)	GPR162 GRCA	Homo sapiens (Human)	588
Q14439	GP176_HUMAN	reviewed	Probable G-protein coupled receptor 176 (HB-954)	GPR176	Homo sapiens (Human)	515
Q6PRD1	GP179_HUMAN	reviewed	Probable G-protein coupled receptor 179 (Probable G-protein coupled receptor 158-like 1) (GPR158-like)	GPR179 GPR158L GPR158L1	Homo sapiens (Human)	2367
Q9Y625	GPC6_HUMAN	reviewed	Glypican-6 [Cleaved into: Secreted glypican-6]	GPC6 UNQ369/PRO705	Homo sapiens (Human)	555
P51674	GPM6A_HUMAN	reviewed	Neuronal membrane glycoprotein M6-a (M6a)	GPM6A M6A	Homo sapiens (Human)	278
Q13491	GPM6B_HUMAN	reviewed	Neuronal membrane glycoprotein M6-b (M6b)	GPM6B M6B	Homo sapiens (Human)	265
Q9NS67	GPR27_HUMAN	reviewed	Probable G-protein coupled receptor 27 (Super conserved receptor expressed in brain 1)	GPR27 SREB1	Homo sapiens (Human)	375
O00155	GPR25_HUMAN	reviewed	Probable G-protein coupled receptor 25	GPR25	Homo sapiens (Human)	361
P46089	GPR3_HUMAN	reviewed	G-protein coupled receptor 3 (ACCA orphan receptor)	GPR3 ACCA	Homo sapiens (Human)	330
Q9BZJ8	GPR61_HUMAN	reviewed	Probable G-protein coupled receptor 61 (Biogenic amine receptor-like G-protein coupled receptor)	GPR61 BALGR	Homo sapiens (Human)	451
P46095	GPR6_HUMAN	reviewed	G-protein coupled receptor 6 (Sphingosine 1-phosphate receptor GPR6)	GPR6	Homo sapiens (Human)	362
Q96P67	GPR82_HUMAN	reviewed	Probable G-protein coupled receptor 82	GPR82	Homo sapiens (Human)	336
Q9BY21	GPR87_HUMAN	reviewed	G-protein coupled receptor 87 (G-protein coupled receptor 95)	GPR87 GPR95 FKSG78	Homo sapiens (Human)	358
P42262	GRIA2_HUMAN	reviewed	Glutamate receptor 2 (GluR-2) (AMPA-selective glutamate receptor 2) (GluR-B) (GluR-K2) (Glutamate receptor ionotropic, AMPA 2) (GluA2)	GRIA2 GLUR2	Homo sapiens (Human)	883
P42261	GRIA1_HUMAN	reviewed	Glutamate receptor 1 (GluR-1) (AMPA-selective glutamate receptor 1) (GluR-A) (GluR-K1) (Glutamate receptor ionotropic, AMPA 1) (GluA1)	GRIA1 GLUH1 GLUR1	Homo sapiens (Human)	906
O95838	GLP2R_HUMAN	reviewed	Glucagon-like peptide 2 receptor (GLP-2 receptor) (GLP-2-R) (GLP-2R)	GLP2R	Homo sapiens (Human)	553
Q96P88	GNRR2_HUMAN	reviewed	Putative gonadotropin-releasing hormone II receptor (GnRH II receptor) (GnRH-II-R) (Type II GnRH receptor)	GNRHR2	Homo sapiens (Human)	292
Q9H4A6	GOLP3_HUMAN	reviewed	Golgi phosphoprotein 3 (Coat protein GPP34) (Mitochondrial DNA absence factor) (MIDAS)	GOLPH3 GPP34	Homo sapiens (Human)	298
P55259	GP2_HUMAN	reviewed	Pancreatic secretory granule membrane major glycoprotein GP2 (Pancreatic zymogen granule membrane protein GP-2) (ZAP75)	GP2	Homo sapiens (Human)	537
Q8TDU6	GPBAR_HUMAN	reviewed	G-protein coupled bile acid receptor 1 (G-protein coupled receptor GPCR19) (hGPCR19) (Membrane-type receptor for bile acids) (M-BAR) (hBG37) (BG37)	GPBAR1 TGR5	Homo sapiens (Human)	330
Q9NQ84	GPC5C_HUMAN	reviewed	G-protein coupled receptor family C group 5 member C (Retinoic acid-induced gene 3 protein) (RAIG-3)	GPRC5C RAIG3 PSEC0087	Homo sapiens (Human)	441
Q99527	GPER1_HUMAN	reviewed	G-protein coupled estrogen receptor 1 (Chemoattractant receptor-like 2) (Flow-induced endothelial G-protein coupled receptor 1) (FEG-1) (G protein-coupled estrogen receptor 1) (G-protein coupled receptor 30) (GPCR-Br) (IL8-related receptor DRY12) (Lymphocyte-derived G-protein coupled receptor) (LYGPR) (Membrane estrogen receptor) (mER)	GPER1 CEPR CMKRL2 DRY12 GPER GPR30	Homo sapiens (Human)	375
P47775	GPR12_HUMAN	reviewed	G-protein coupled receptor 12	GPR12	Homo sapiens (Human)	334
O00270	GPR31_HUMAN	reviewed	12-(S)-hydroxy-5,8,10,14-eicosatetraenoic acid receptor (12-(S)-HETE receptor) (12-HETER) (G-protein coupled receptor 31)	GPR31	Homo sapiens (Human)	319
Q49SQ1	GPR33_HUMAN	reviewed	Probable G-protein coupled receptor 33	GPR33	Homo sapiens (Human)	333
P39086	GRIK1_HUMAN	reviewed	Glutamate receptor ionotropic, kainate 1 (GluK1) (Excitatory amino acid receptor 3) (EAA3) (Glutamate receptor 5) (GluR-5) (GluR5)	GRIK1 GLUR5	Homo sapiens (Human)	918
Q13002	GRIK2_HUMAN	reviewed	Glutamate receptor ionotropic, kainate 2 (GluK2) (Excitatory amino acid receptor 4) (EAA4) (Glutamate receptor 6) (GluR-6) (GluR6)	GRIK2 GLUR6	Homo sapiens (Human)	908
Q13003	GRIK3_HUMAN	reviewed	Glutamate receptor ionotropic, kainate 3 (GluK3) (Excitatory amino acid receptor 5) (EAA5) (Glutamate receptor 7) (GluR-7) (GluR7)	GRIK3 GLUR7	Homo sapiens (Human)	919
Q9Y3R0	GRIP1_HUMAN	reviewed	Glutamate receptor-interacting protein 1 (GRIP-1)	GRIP1	Homo sapiens (Human)	1128
O95267	GRP1_HUMAN	reviewed	RAS guanyl-releasing protein 1 (Calcium and DAG-regulated guanine nucleotide exchange factor II) (CalDAG-GEFII) (Ras guanyl-releasing protein)	RASGRP1 RASGRP	Homo sapiens (Human)	797
P49841	GSK3B_HUMAN	reviewed	Glycogen synthase kinase-3 beta (GSK-3 beta) (EC 2.7.11.26) (Serine/threonine-protein kinase GSK3B) (EC 2.7.11.1)	GSK3B	Homo sapiens (Human)	420
Q5JWF2	GNAS1_HUMAN	reviewed	Guanine nucleotide-binding protein G(s) subunit alpha isoforms XLas (Adenylate cyclase-stimulating G alpha protein) (Extra large alphas protein) (XLalphas)	GNAS GNAS1	Homo sapiens (Human)	1037
P63092	GNAS2_HUMAN	reviewed	Guanine nucleotide-binding protein G(s) subunit alpha isoforms short (Adenylate cyclase-stimulating G alpha protein)	GNAS GNAS1 GSP	Homo sapiens (Human)	394
Q8TDV5	GP119_HUMAN	reviewed	Glucose-dependent insulinotropic receptor (G-protein coupled receptor 119)	GPR119	Homo sapiens (Human)	335
Q9NZD1	GPC5D_HUMAN	reviewed	G-protein coupled receptor family C group 5 member D	GPRC5D	Homo sapiens (Human)	345
Q5T6X5	GPC6A_HUMAN	reviewed	G-protein coupled receptor family C group 6 member A (hGPRC6A) (G-protein coupled receptor GPCR33) (hGPCR33)	GPRC6A	Homo sapiens (Human)	926
Q99678	GPR20_HUMAN	reviewed	G-protein coupled receptor 20	GPR20	Homo sapiens (Human)	358
O15354	GPR37_HUMAN	reviewed	Prosaposin receptor GPR37 (Endothelin B receptor-like protein 1) (ETBR-LP-1) (G-protein coupled receptor 37) (Parkin-associated endothelin receptor-like receptor) (PAELR)	GPR37	Homo sapiens (Human)	613
Q9BZJ7	GPR62_HUMAN	reviewed	Probable G-protein coupled receptor 62 (G-protein coupled receptor GPCR8) (hGPCR8) (G-protein coupled receptor KPG_005)	GPR62	Homo sapiens (Human)	368
Q9NYM4	GPR83_HUMAN	reviewed	Probable G-protein coupled receptor 83 (G-protein coupled receptor 72)	GPR83 GPR72 KIAA1540	Homo sapiens (Human)	423
P60893	GPR85_HUMAN	reviewed	Probable G-protein coupled receptor 85 (Super conserved receptor expressed in brain 2)	GPR85 SREB2	Homo sapiens (Human)	370
Q14451	GRB7_HUMAN	reviewed	Growth factor receptor-bound protein 7 (B47) (Epidermal growth factor receptor GRB-7) (GRB7 adapter protein)	GRB7	Homo sapiens (Human)	532
Q3V6T2	GRDN_HUMAN	reviewed	Girdin (Akt phosphorylation enhancer) (APE) (Coiled-coil domain-containing protein 88A) (G alpha-interacting vesicle-associated protein) (GIV) (Girders of actin filament) (Hook-related protein 1) (HkRP1)	CCDC88A APE GRDN KIAA1212	Homo sapiens (Human)	1871
P42263	GRIA3_HUMAN	reviewed	Glutamate receptor 3 (GluR-3) (AMPA-selective glutamate receptor 3) (GluR-C) (GluR-K3) (Glutamate receptor ionotropic, AMPA 3) (GluA3)	GRIA3 GLUR3 GLURC	Homo sapiens (Human)	894
Q14833	GRM4_HUMAN	reviewed	Metabotropic glutamate receptor 4 (mGluR4)	GRM4 GPRC1D MGLUR4	Homo sapiens (Human)	912
O15303	GRM6_HUMAN	reviewed	Metabotropic glutamate receptor 6 (mGluR6)	GRM6 GPRC1F MGLUR6	Homo sapiens (Human)	877
Q14831	GRM7_HUMAN	reviewed	Metabotropic glutamate receptor 7 (mGluR7)	GRM7 GPRC1G MGLUR7	Homo sapiens (Human)	915
Q8TDF6	GRP4_HUMAN	reviewed	RAS guanyl-releasing protein 4	RASGRP4	Homo sapiens (Human)	673
Q6UXU4	GSG1L_HUMAN	reviewed	Germ cell-specific gene 1-like protein (GSG1-like protein)	GSG1L UNQ5831/PRO19651	Homo sapiens (Human)	331
Q9BYW1	GTR11_HUMAN	reviewed	Solute carrier family 2, facilitated glucose transporter member 11 (Glucose transporter type 10) (GLUT-10) (Glucose transporter type 11) (GLUT-11)	SLC2A11 GLUT10 GLUT11	Homo sapiens (Human)	496
P11166	GTR1_HUMAN	reviewed	Solute carrier family 2, facilitated glucose transporter member 1 (Glucose transporter type 1, erythrocyte/brain) (GLUT-1) (HepG2 glucose transporter)	SLC2A1 GLUT1	Homo sapiens (Human)	492
P14672	GTR4_HUMAN	reviewed	Solute carrier family 2, facilitated glucose transporter member 4 (Glucose transporter type 4, insulin-responsive) (GLUT-4)	SLC2A4 GLUT4	Homo sapiens (Human)	509
Q9UGQ3	GTR6_HUMAN	reviewed	Solute carrier family 2, facilitated glucose transporter member 6 (Glucose transporter type 6) (GLUT-6) (Glucose transporter type 9) (GLUT-9)	SLC2A6 GLUT9	Homo sapiens (Human)	507
Q9NY64	GTR8_HUMAN	reviewed	Solute carrier family 2, facilitated glucose transporter member 8 (Glucose transporter type 8) (GLUT-8) (Glucose transporter type X1)	SLC2A8 GLUT8 GLUTX1	Homo sapiens (Human)	477
Q9NRM0	GTR9_HUMAN	reviewed	Solute carrier family 2, facilitated glucose transporter member 9 (Glucose transporter type 9) (GLUT-9)	SLC2A9 GLUT9	Homo sapiens (Human)	540
P25092	GUC2C_HUMAN	reviewed	Heat-stable enterotoxin receptor (STA receptor) (hSTAR) (EC 4.6.1.2) (Guanylyl cyclase C) (GC-C) (Intestinal guanylate cyclase)	GUCY2C GUC2C STAR	Homo sapiens (Human)	1073
P29992	GNA11_HUMAN	reviewed	Guanine nucleotide-binding protein subunit alpha-11 (G alpha-11) (G-protein subunit alpha-11) (Guanine nucleotide-binding protein G(y) subunit alpha)	GNA11 GA11	Homo sapiens (Human)	359
Q9UNW8	GP132_HUMAN	reviewed	Probable G-protein coupled receptor 132 (G2 accumulation protein)	GPR132 G2A	Homo sapiens (Human)	380
Q9BXC1	GP174_HUMAN	reviewed	Probable G-protein coupled receptor 174	GPR174 FKSG79 GPCR17	Homo sapiens (Human)	333
O15218	GP182_HUMAN	reviewed	G-protein coupled receptor 182	GPR182 ADMR	Homo sapiens (Human)	404
P35052	GPC1_HUMAN	reviewed	Glypican-1 [Cleaved into: Secreted glypican-1]	GPC1	Homo sapiens (Human)	558
P51654	GPC3_HUMAN	reviewed	Glypican-3 (GTR2-2) (Intestinal protein OCI-5) (MXR7) [Cleaved into: Secreted glypican-3]	GPC3 OCI5	Homo sapiens (Human)	580
Q14956	GPNMB_HUMAN	reviewed	Transmembrane glycoprotein NMB (Transmembrane glycoprotein HGFIN)	GPNMB HGFIN NMB UNQ1725/PRO9925	Homo sapiens (Human)	572
Q14330	GPR18_HUMAN	reviewed	N-arachidonyl glycine receptor (NAGly receptor) (G-protein coupled receptor 18)	GPR18 GPCRW	Homo sapiens (Human)	331
Q9HCN6	GPVI_HUMAN	reviewed	Platelet glycoprotein VI (GPVI) (Glycoprotein 6)	GP6	Homo sapiens (Human)	339
Q16099	GRIK4_HUMAN	reviewed	Glutamate receptor ionotropic, kainate 4 (GluK4) (Excitatory amino acid receptor 1) (EAA1) (Glutamate receptor KA-1) (KA1)	GRIK4 GRIK	Homo sapiens (Human)	956
P22732	GTR5_HUMAN	reviewed	Solute carrier family 2, facilitated glucose transporter member 5 (Fructose transporter) (Glucose transporter type 5, small intestine) (GLUT-5)	SLC2A5 GLUT5	Homo sapiens (Human)	501
Q9HD26	GOPC_HUMAN	reviewed	Golgi-associated PDZ and coiled-coil motif-containing protein (CFTR-associated ligand) (Fused in glioblastoma) (PDZ protein interacting specifically with TC10) (PIST)	GOPC CAL FIG	Homo sapiens (Human)	462
Q96P66	GP101_HUMAN	reviewed	Probable G-protein coupled receptor 101	GPR101	Homo sapiens (Human)	508
Q8IZ08	GP135_HUMAN	reviewed	Probable G-protein coupled receptor 135	GPR135	Homo sapiens (Human)	494
Q7Z601	GP142_HUMAN	reviewed	Probable G-protein coupled receptor 142 (G-protein coupled receptor PGR2)	GPR142 PGR2	Homo sapiens (Human)	462
P51810	GP143_HUMAN	reviewed	G-protein coupled receptor 143 (Ocular albinism type 1 protein)	GPR143 OA1	Homo sapiens (Human)	404
Q8NGU9	GP150_HUMAN	reviewed	Probable G-protein coupled receptor 150	GPR150	Homo sapiens (Human)	434
O14626	GP171_HUMAN	reviewed	Probable G-protein coupled receptor 171 (G-protein coupled receptor H963)	GPR171 H963	Homo sapiens (Human)	319
Q9NS66	GP173_HUMAN	reviewed	Probable G-protein coupled receptor 173 (Super conserved receptor expressed in brain 3)	GPR173 SREB3	Homo sapiens (Human)	373
Q8N158	GPC2_HUMAN	reviewed	Glypican-2 [Cleaved into: Secreted glypican-2]	GPC2	Homo sapiens (Human)	579
O75487	GPC4_HUMAN	reviewed	Glypican-4 (K-glypican) [Cleaved into: Secreted glypican-4]	GPC4 UNQ474/PRO937	Homo sapiens (Human)	556
P49685	GPR15_HUMAN	reviewed	G-protein coupled receptor 15 (Brother of Bonzo) (BoB)	GPR15	Homo sapiens (Human)	360
Q99679	GPR21_HUMAN	reviewed	Probable G-protein coupled receptor 21	GPR21	Homo sapiens (Human)	349
O75388	GPR32_HUMAN	reviewed	Probable G-protein coupled receptor 32	GPR32	Homo sapiens (Human)	356
Q99680	GPR22_HUMAN	reviewed	Probable G-protein coupled receptor 22	GPR22	Homo sapiens (Human)	433
O43194	GPR39_HUMAN	reviewed	G-protein coupled receptor 39	GPR39	Homo sapiens (Human)	453
O15529	GPR42_HUMAN	reviewed	G-protein coupled receptor 42	GPR42 GPR42P	Homo sapiens (Human)	346
O95800	GPR75_HUMAN	reviewed	Probable G-protein coupled receptor 75	GPR75	Homo sapiens (Human)	540
Q8WXG9	GPR98_HUMAN	reviewed	G-protein coupled receptor 98 (Monogenic audiogenic seizure susceptibility protein 1 homolog) (Usher syndrome type-2C protein) (Very large G-protein coupled receptor 1)	GPR98 KIAA0686 KIAA1943 MASS1 VLGR1	Homo sapiens (Human)	6306
Q7Z6J2	GRASP_HUMAN	reviewed	General receptor for phosphoinositides 1-associated scaffold protein (GRP1-associated scaffold protein)	GRASP	Homo sapiens (Human)	395
A4D2P6	GRD2I_HUMAN	reviewed	Delphilin (Glutamate receptor, ionotropic, delta 2-interacting protein 1)	GRID2IP	Homo sapiens (Human)	1211
Q9ULK0	GRID1_HUMAN	reviewed	Glutamate receptor ionotropic, delta-1 (GluD1) (GluR delta-1 subunit)	GRID1 KIAA1220	Homo sapiens (Human)	1009
Q7LDG7	GRP2_HUMAN	reviewed	RAS guanyl-releasing protein 2 (Calcium and DAG-regulated guanine nucleotide exchange factor I) (CalDAG-GEFI) (Cdc25-like protein) (hCDC25L) (F25B3.3 kinase-like protein)	RASGRP2 CDC25L MCG7	Homo sapiens (Human)	609
P11169	GTR3_HUMAN	reviewed	Solute carrier family 2, facilitated glucose transporter member 3 (Glucose transporter type 3, brain) (GLUT-3)	SLC2A3 GLUT3	Homo sapiens (Human)	496
Q13304	GPR17_HUMAN	reviewed	Uracil nucleotide/cysteinyl leukotriene receptor (UDP/CysLT receptor) (G-protein coupled receptor 17) (P2Y-like receptor) (R12)	GPR17	Homo sapiens (Human)	367
Q9UPC5	GPR34_HUMAN	reviewed	Probable G-protein coupled receptor 34	GPR34	Homo sapiens (Human)	381
P46093	GPR4_HUMAN	reviewed	G-protein coupled receptor 4 (G-protein coupled receptor 19)	GPR4 GPR19	Homo sapiens (Human)	362
Q9Y2T5	GPR52_HUMAN	reviewed	Probable G-protein coupled receptor 52	GPR52	Homo sapiens (Human)	361
Q9Y2T6	GPR55_HUMAN	reviewed	G-protein coupled receptor 55	GPR55	Homo sapiens (Human)	319
Q96P69	GPR78_HUMAN	reviewed	G-protein coupled receptor 78	GPR78 UNQ5925/PRO19818	Homo sapiens (Human)	363
Q9NQS5	GPR84_HUMAN	reviewed	G-protein coupled receptor 84 (Inflammation-related G-protein coupled receptor EX33)	GPR84 EX33	Homo sapiens (Human)	396
Q9GZN0	GPR88_HUMAN	reviewed	Probable G-protein coupled receptor 88 (Striatum-specific G-protein coupled receptor)	GPR88 STRG	Homo sapiens (Human)	384
P34947	GRK5_HUMAN	reviewed	G protein-coupled receptor kinase 5 (EC 2.7.11.16) (G protein-coupled receptor kinase GRK5)	GRK5 GPRK5	Homo sapiens (Human)	590
Q13255	GRM1_HUMAN	reviewed	Metabotropic glutamate receptor 1 (mGluR1)	GRM1 GPRC1A MGLUR1	Homo sapiens (Human)	1194
Q14416	GRM2_HUMAN	reviewed	Metabotropic glutamate receptor 2 (mGluR2)	GRM2 GPRC1B MGLUR2	Homo sapiens (Human)	872
Q14832	GRM3_HUMAN	reviewed	Metabotropic glutamate receptor 3 (mGluR3)	GRM3 GPRC1C MGLUR3	Homo sapiens (Human)	879
P41594	GRM5_HUMAN	reviewed	Metabotropic glutamate receptor 5 (mGluR5)	GRM5 GPRC1E MGLUR5	Homo sapiens (Human)	1212
Q9UMX6	GUC1B_HUMAN	reviewed	Guanylyl cyclase-activating protein 2 (GCAP 2) (Guanylate cyclase activator 1B)	GUCA1B GCAP2	Homo sapiens (Human)	200
Q8TDS4	HCAR2_HUMAN	reviewed	Hydroxycarboxylic acid receptor 2 (G-protein coupled receptor 109A) (G-protein coupled receptor HM74A) (Niacin receptor 1) (Nicotinic acid receptor)	HCAR2 GPR109A HCA2 HM74A NIACR1	Homo sapiens (Human)	363
P49019	HCAR3_HUMAN	reviewed	Hydroxycarboxylic acid receptor 3 (G-protein coupled receptor 109B) (G-protein coupled receptor HM74) (G-protein coupled receptor HM74B) (Niacin receptor 2) (Nicotinic acid receptor 2)	HCAR3 GPR109B HCA3 HM74B NIACR2	Homo sapiens (Human)	387
Q9P1Z3	HCN3_HUMAN	reviewed	Potassium/sodium hyperpolarization-activated cyclic nucleotide-gated channel 3	HCN3 KIAA1535	Homo sapiens (Human)	774
Q15760	GPR19_HUMAN	reviewed	Probable G-protein coupled receptor 19 (GPR-NGA)	GPR19	Homo sapiens (Human)	415
P48058	GRIA4_HUMAN	reviewed	Glutamate receptor 4 (GluR-4) (GluR4) (AMPA-selective glutamate receptor 4) (GluR-D) (Glutamate receptor ionotropic, AMPA 4) (GluA4)	GRIA4 GLUR4	Homo sapiens (Human)	902
Q16478	GRIK5_HUMAN	reviewed	Glutamate receptor ionotropic, kainate 5 (GluK5) (Excitatory amino acid receptor 2) (EAA2) (Glutamate receptor KA-2) (KA2)	GRIK5 GRIK2	Homo sapiens (Human)	980
Q7Z2K8	GRIN1_HUMAN	reviewed	G protein-regulated inducer of neurite outgrowth 1 (GRIN1)	GPRIN1 KIAA1893	Homo sapiens (Human)	1008
P30550	GRPR_HUMAN	reviewed	Gastrin-releasing peptide receptor (GRP-R) (GRP-preferring bombesin receptor)	GRPR	Homo sapiens (Human)	384
O43424	GRID2_HUMAN	reviewed	Glutamate receptor ionotropic, delta-2 (GluD2) (GluR delta-2 subunit)	GRID2 GLURD2	Homo sapiens (Human)	1007
O00222	GRM8_HUMAN	reviewed	Metabotropic glutamate receptor 8 (mGluR8)	GRM8 GPRC1H MGLUR8	Homo sapiens (Human)	908
Q9Y3Q4	HCN4_HUMAN	reviewed	Potassium/sodium hyperpolarization-activated cyclic nucleotide-gated channel 4	HCN4	Homo sapiens (Human)	1203
Q9ULI3	HEG1_HUMAN	reviewed	Protein HEG homolog 1	HEG1 KIAA1237	Homo sapiens (Human)	1381
Q8IV16	HDBP1_HUMAN	reviewed	Glycosylphosphatidylinositol-anchored high density lipoprotein-binding protein 1 (GPI-HBP1) (GPI-anchored HDL-binding protein 1) (High density lipoprotein-binding protein 1)	GPIHBP1 HBP1	Homo sapiens (Human)	184
Q96QV1	HHIP_HUMAN	reviewed	Hedgehog-interacting protein (HHIP) (HIP)	HHIP HIP UNQ5825/PRO19644	Homo sapiens (Human)	700
Q99075	HBEGF_HUMAN	reviewed	Proheparin-binding EGF-like growth factor [Cleaved into: Heparin-binding EGF-like growth factor (HB-EGF) (HBEGF) (Diphtheria toxin receptor) (DT-R)]	HBEGF DTR DTS HEGFL	Homo sapiens (Human)	208
Q9UL51	HCN2_HUMAN	reviewed	Potassium/sodium hyperpolarization-activated cyclic nucleotide-gated channel 2 (Brain cyclic nucleotide-gated channel 2) (BCNG-2)	HCN2 BCNG2	Homo sapiens (Human)	889
O60741	HCN1_HUMAN	reviewed	Potassium/sodium hyperpolarization-activated cyclic nucleotide-gated channel 1 (Brain cyclic nucleotide-gated channel 1) (BCNG-1)	HCN1 BCNG1	Homo sapiens (Human)	890
Q30201	HFE_HUMAN	reviewed	Hereditary hemochromatosis protein (HLA-H)	HFE HLAH	Homo sapiens (Human)	348
Q9BXC0	HCAR1_HUMAN	reviewed	Hydroxycarboxylic acid receptor 1 (G-protein coupled receptor 104) (G-protein coupled receptor 81)	HCAR1 GPR104 GPR81 HCA1 FKSG80	Homo sapiens (Human)	346
Q8TCT9	HM13_HUMAN	reviewed	Minor histocompatibility antigen H13 (EC 3.4.23.-) (Intramembrane protease 1) (IMP-1) (IMPAS-1) (hIMP1) (Presenilin-like protein 3) (Signal peptide peptidase)	HM13 H13 IMP1 PSL3 SPP MSTP086	Homo sapiens (Human)	377
P09429	HMGB1_HUMAN	reviewed	High mobility group protein B1 (High mobility group protein 1) (HMG-1)	HMGB1 HMG1	Homo sapiens (Human)	215
P04233	HG2A_HUMAN	reviewed	HLA class II histocompatibility antigen gamma chain (HLA-DR antigens-associated invariant chain) (Ia antigen-associated invariant chain) (Ii) (p33) (CD antigen CD74)	CD74 DHLAG	Homo sapiens (Human)	296
Q95460	HMR1_HUMAN	reviewed	Major histocompatibility complex class I-related gene protein (MHC class I-related gene protein) (Class I histocompatibility antigen-like protein)	MR1	Homo sapiens (Human)	341
Q9Y5N1	HRH3_HUMAN	reviewed	Histamine H3 receptor (H3R) (HH3R) (G-protein coupled receptor 97)	HRH3 GPCR97	Homo sapiens (Human)	445
P05981	HEPS_HUMAN	reviewed	Serine protease hepsin (EC 3.4.21.106) (Transmembrane protease serine 1) [Cleaved into: Serine protease hepsin non-catalytic chain; Serine protease hepsin catalytic chain]	HPN TMPRSS1	Homo sapiens (Human)	417
P35367	HRH1_HUMAN	reviewed	Histamine H1 receptor (H1R) (HH1R)	HRH1	Homo sapiens (Human)	487
P01893	HLAH_HUMAN	reviewed	Putative HLA class I histocompatibility antigen, alpha chain H (HLA-12.4) (HLA-AR) (MHC class I antigen H)	HLA-H HLAH	Homo sapiens (Human)	362
Q9NSC5	HOME3_HUMAN	reviewed	Homer protein homolog 3 (Homer-3)	HOMER3	Homo sapiens (Human)	361
Q9NSB8	HOME2_HUMAN	reviewed	Homer protein homolog 2 (Homer-2) (Cupidin)	HOMER2	Homo sapiens (Human)	354
Q92743	HTRA1_HUMAN	reviewed	Serine protease HTRA1 (EC 3.4.21.-) (High-temperature requirement A serine peptidase 1) (L56) (Serine protease 11)	HTRA1 HTRA PRSS11	Homo sapiens (Human)	480
Q96F46	I17RA_HUMAN	reviewed	Interleukin-17 receptor A (IL-17 receptor A) (IL-17RA) (CDw217) (CD antigen CD217)	IL17RA IL17R	Homo sapiens (Human)	866
Q86YM7	HOME1_HUMAN	reviewed	Homer protein homolog 1 (Homer-1)	HOMER1 SYN47	Homo sapiens (Human)	354
Q96D96	HVCN1_HUMAN	reviewed	Voltage-gated hydrogen channel 1 (Hydrogen voltage-gated channel 1) (HV1) (Voltage sensor domain-only protein)	HVCN1 VSOP UNQ578/PRO1140	Homo sapiens (Human)	273
Q9NRM6	I17RB_HUMAN	reviewed	Interleukin-17 receptor B (IL-17 receptor B) (IL-17RB) (Cytokine receptor-like 4) (IL-17 receptor homolog 1) (IL-17Rh1) (IL17Rh1) (Interleukin-17B receptor) (IL-17B receptor)	IL17RB CRL4 EVI27 IL17BR UNQ2501/PRO19612	Homo sapiens (Human)	502
Q8NFM7	I17RD_HUMAN	reviewed	Interleukin-17 receptor D (IL-17 receptor D) (IL-17RD) (IL17Rhom) (Interleukin-17 receptor-like protein) (Sef homolog) (hSef)	IL17RD IL17RLM SEF UNQ6115/PRO20026	Homo sapiens (Human)	739
Q8WWN9	ICEF1_HUMAN	reviewed	Interactor protein for cytohesin exchange factors 1 (Phosphoinositide-binding protein PIP3-E)	IPCEF1 KIAA0403	Homo sapiens (Human)	437
Q12891	HYAL2_HUMAN	reviewed	Hyaluronidase-2 (Hyal-2) (EC 3.2.1.35) (Hyaluronoglucosaminidase-2) (Lung carcinoma protein 2) (LuCa-2)	HYAL2 LUCA2	Homo sapiens (Human)	473
Q8NFR9	I17RE_HUMAN	reviewed	Interleukin-17 receptor E (IL-17 receptor E) (IL-17RE)	IL17RE UNQ3056/PRO9877	Homo sapiens (Human)	667
P25021	HRH2_HUMAN	reviewed	Histamine H2 receptor (H2R) (HH2R) (Gastric receptor I)	HRH2	Homo sapiens (Human)	359
Q9H3N8	HRH4_HUMAN	reviewed	Histamine H4 receptor (H4R) (HH4R) (AXOR35) (G-protein coupled receptor 105) (GPRv53) (Pfi-013) (SP9144)	HRH4 GPCR105	Homo sapiens (Human)	390
P11142	HSP7C_HUMAN	reviewed	Heat shock cognate 71 kDa protein (Heat shock 70 kDa protein 8) (Lipopolysaccharide-associated protein 1) (LAP-1) (LPS-associated protein 1)	HSPA8 HSC70 HSP73 HSPA10	Homo sapiens (Human)	646
Q9Y6W8	ICOS_HUMAN	reviewed	Inducible T-cell costimulator (Activation-inducible lymphocyte immunomediatory molecule) (CD antigen CD278)	ICOS AILIM	Homo sapiens (Human)	199
P14735	IDE_HUMAN	reviewed	Insulin-degrading enzyme (EC 3.4.24.56) (Abeta-degrading protease) (Insulin protease) (Insulinase) (Insulysin)	IDE	Homo sapiens (Human)	1019
Q13325	IFIT5_HUMAN	reviewed	Interferon-induced protein with tetratricopeptide repeats 5 (IFIT-5) (Interferon-induced 58 kDa protein) (Retinoic acid- and interferon-inducible 58 kDa protein) (P58)	IFIT5 ISG58 RI58	Homo sapiens (Human)	482
A6NMD0	IFM10_HUMAN	reviewed	Interferon-induced transmembrane protein 10 (Dispanin subfamily A member 3) (DSPA3)	IFITM10	Homo sapiens (Human)	228
A6NNB3	IFM5_HUMAN	reviewed	Interferon-induced transmembrane protein 5 (Bone-restricted interferon-induced transmembrane protein-like protein) (BRIL) (Dispanin subfamily A member 1) (DSPA1)	IFITM5	Homo sapiens (Human)	132
P38567	HYALP_HUMAN	reviewed	Hyaluronidase PH-20 (Hyal-PH20) (EC 3.2.1.35) (Hyaluronoglucosaminidase PH-20) (Sperm adhesion molecule 1) (Sperm surface protein PH-20)	SPAM1 HYAL3 PH20	Homo sapiens (Human)	509
Q969P0	IGSF8_HUMAN	reviewed	Immunoglobulin superfamily member 8 (IgSF8) (CD81 partner 3) (Glu-Trp-Ile EWI motif-containing protein 2) (EWI-2) (Keratinocytes-associated transmembrane protein 4) (KCT-4) (LIR-D1) (Prostaglandin regulatory-like protein) (PGRL) (CD antigen CD316)	IGSF8 CD81P3 EWI2 KCT4	Homo sapiens (Human)	613
P24394	IL4RA_HUMAN	reviewed	Interleukin-4 receptor subunit alpha (IL-4 receptor subunit alpha) (IL-4R subunit alpha) (IL-4R-alpha) (IL-4RA) (CD antigen CD124) [Cleaved into: Soluble interleukin-4 receptor subunit alpha (Soluble IL-4 receptor subunit alpha) (Soluble IL-4R-alpha) (sIL4Ralpha/prot) (IL-4-binding protein) (IL4-BP)]	IL4R IL4RA 582J2.1	Homo sapiens (Human)	825
P07900	HS90A_HUMAN	reviewed	Heat shock protein HSP 90-alpha (Heat shock 86 kDa) (HSP 86) (HSP86) (Lipopolysaccharide-associated protein 2) (LAP-2) (LPS-associated protein 2) (Renal carcinoma antigen NY-REN-38)	HSP90AA1 HSP90A HSPC1 HSPCA	Homo sapiens (Human)	732
Q8NAC3	I17RC_HUMAN	reviewed	Interleukin-17 receptor C (IL-17 receptor C) (IL-17RC) (Interleukin-17 receptor homolog) (IL17Rhom) (Interleukin-17 receptor-like protein) (IL-17RL) (ZcytoR14)	IL17RC UNQ6118/PRO20040/PRO38901	Homo sapiens (Human)	791
Q9H665	IGFR1_HUMAN	reviewed	IGF-like family receptor 1 (Transmembrane protein 149) (U2 small nuclear RNA auxiliary factor 1-like 4)	IGFLR1 TMEM149 U2AF1L4	Homo sapiens (Human)	355
P01880	IGHD_HUMAN	reviewed	Ig delta chain C region	IGHD	Homo sapiens (Human)	384
Q5DX21	IGS11_HUMAN	reviewed	Immunoglobulin superfamily member 11 (IgSF11) (Brain and testis-specific immunoglobulin superfamily protein) (Bt-IGSF) (V-set and immunoglobulin domain-containing protein 3)	IGSF11 BTIGSF CXADRL1 VSIG3	Homo sapiens (Human)	431
P13164	IFM1_HUMAN	reviewed	Interferon-induced transmembrane protein 1 (Dispanin subfamily A member 2a) (DSPA2a) (Interferon-induced protein 17) (Interferon-inducible protein 9-27) (Leu-13 antigen) (CD antigen CD225)	IFITM1 CD225 IFI17	Homo sapiens (Human)	125
Q8TDY8	IGDC4_HUMAN	reviewed	Immunoglobulin superfamily DCC subclass member 4 (Neighbor of punc e11) (Protein DDM36) (hDDM36)	IGDCC4 DDM36 KIAA1628 NOPE	Homo sapiens (Human)	1250
P01871	IGHM_HUMAN	reviewed	Ig mu chain C region	IGHM	Homo sapiens (Human)	452
Q9NPH3	IL1AP_HUMAN	reviewed	Interleukin-1 receptor accessory protein (IL-1 receptor accessory protein) (IL-1RAcP) (Interleukin-1 receptor 3) (IL-1R-3) (IL-1R3)	IL1RAP C3orf13 IL1R3	Homo sapiens (Human)	570
Q01113	IL9R_HUMAN	reviewed	Interleukin-9 receptor (IL-9 receptor) (IL-9R) (CD antigen CD129)	IL9R	Homo sapiens (Human)	521
Q13418	ILK_HUMAN	reviewed	Integrin-linked protein kinase (EC 2.7.11.1) (59 kDa serine/threonine-protein kinase) (ILK-1) (ILK-2) (p59ILK)	ILK ILK1 ILK2	Homo sapiens (Human)	452
P15260	INGR1_HUMAN	reviewed	Interferon gamma receptor 1 (IFN-gamma receptor 1) (IFN-gamma-R1) (CDw119) (CD antigen CD119)	IFNGR1	Homo sapiens (Human)	489
Q9BYI3	HYCCI_HUMAN	reviewed	Hyccin (Down-regulated by CTNNB1 protein A) (Protein FAM126A)	FAM126A DRCTNNB1A	Homo sapiens (Human)	521
Q14773	ICAM4_HUMAN	reviewed	Intercellular adhesion molecule 4 (ICAM-4) (Landsteiner-Wiener blood group glycoprotein) (LW blood group protein) (CD antigen CD242)	ICAM4 LW	Homo sapiens (Human)	271
Q9NSI5	IGSF5_HUMAN	reviewed	Immunoglobulin superfamily member 5 (IgSF5) (Junctional adhesion molecule 4) (JAM-4)	IGSF5 JAM4	Homo sapiens (Human)	407
P14778	IL1R1_HUMAN	reviewed	Interleukin-1 receptor type 1 (IL-1R-1) (IL-1RT-1) (IL-1RT1) (CD121 antigen-like family member A) (Interleukin-1 receptor alpha) (IL-1R-alpha) (Interleukin-1 receptor type I) (p80) (CD antigen CD121a) [Cleaved into: Interleukin-1 receptor type 1, membrane form (mIL-1R1) (mIL-1RI); Interleukin-1 receptor type 1, soluble form (sIL-1R1) (sIL-1RI)]	IL1R1 IL1R IL1RA IL1RT1	Homo sapiens (Human)	569
Q8NI17	IL31R_HUMAN	reviewed	Interleukin-31 receptor subunit alpha (IL-31 receptor subunit alpha) (IL-31R subunit alpha) (IL-31R-alpha) (IL-31RA) (Cytokine receptor-like 3) (GLM-R) (hGLM-R) (Gp130-like monocyte receptor) (Gp130-like receptor) (ZcytoR17)	IL31RA CRL3 GPL UNQ6368/PRO21073/PRO21384	Homo sapiens (Human)	732
P16871	IL7RA_HUMAN	reviewed	Interleukin-7 receptor subunit alpha (IL-7 receptor subunit alpha) (IL-7R subunit alpha) (IL-7R-alpha) (IL-7RA) (CDw127) (CD antigen CD127)	IL7R	Homo sapiens (Human)	459
P08887	IL6RA_HUMAN	reviewed	Interleukin-6 receptor subunit alpha (IL-6 receptor subunit alpha) (IL-6R subunit alpha) (IL-6R-alpha) (IL-6RA) (IL-6R 1) (Membrane glycoprotein 80) (gp80) (CD antigen CD126)	IL6R	Homo sapiens (Human)	468
Q01638	ILRL1_HUMAN	reviewed	Interleukin-1 receptor-like 1 (Protein ST2)	IL1RL1 DER4 ST2 T1	Homo sapiens (Human)	556
P08069	IGF1R_HUMAN	reviewed	Insulin-like growth factor 1 receptor (EC 2.7.10.1) (Insulin-like growth factor I receptor) (IGF-I receptor) (CD antigen CD221) [Cleaved into: Insulin-like growth factor 1 receptor alpha chain; Insulin-like growth factor 1 receptor beta chain]	IGF1R	Homo sapiens (Human)	1367
Q86SU0	ILDR1_HUMAN	reviewed	Immunoglobulin-like domain-containing receptor 1	ILDR1	Homo sapiens (Human)	546
P55073	IOD3_HUMAN	reviewed	Thyroxine 5-deiodinase (EC 1.21.99.3) (5DIII) (DIOIII) (Type 3 DI) (Type III iodothyronine deiodinase)	DIO3 ITDI3 TXDI3	Homo sapiens (Human)	304
Q01629	IFM2_HUMAN	reviewed	Interferon-induced transmembrane protein 2 (Dispanin subfamily A member 2c) (DSPA2c) (Interferon-inducible protein 1-8D)	IFITM2	Homo sapiens (Human)	132
Q14623	IHH_HUMAN	reviewed	Indian hedgehog protein (IHH) (HHG-2) [Cleaved into: Indian hedgehog protein N-product; Indian hedgehog protein C-product]	IHH	Homo sapiens (Human)	411
Q5VWK5	IL23R_HUMAN	reviewed	Interleukin-23 receptor (IL-23 receptor) (IL-23R)	IL23R	Homo sapiens (Human)	629
Q01628	IFM3_HUMAN	reviewed	Interferon-induced transmembrane protein 3 (Dispanin subfamily A member 2b) (DSPA2b) (Interferon-inducible protein 1-8U)	IFITM3	Homo sapiens (Human)	133
Q8NI35	INADL_HUMAN	reviewed	InaD-like protein (Inadl protein) (hINADL) (Pals1-associated tight junction protein) (Protein associated to tight junctions)	INADL PATJ	Homo sapiens (Human)	1801
P17181	INAR1_HUMAN	reviewed	Interferon alpha/beta receptor 1 (IFN-R-1) (IFN-alpha/beta receptor 1) (Cytokine receptor class-II member 1) (Cytokine receptor family 2 member 1) (CRF2-1) (Type I interferon receptor 1)	IFNAR1 IFNAR	Homo sapiens (Human)	557
Q9NRR6	INP5E_HUMAN	reviewed	72 kDa inositol polyphosphate 5-phosphatase (EC 3.1.3.36) (Phosphatidylinositol 4,5-bisphosphate 5-phosphatase) (Phosphatidylinositol polyphosphate 5-phosphatase type IV)	INPP5E	Homo sapiens (Human)	644
P53708	ITA8_HUMAN	reviewed	Integrin alpha-8 [Cleaved into: Integrin alpha-8 heavy chain; Integrin alpha-8 light chain]	ITGA8	Homo sapiens (Human)	1063
Q96J02	ITCH_HUMAN	reviewed	E3 ubiquitin-protein ligase Itchy homolog (Itch) (EC 6.3.2.-) (Atrophin-1-interacting protein 4) (AIP4) (NFE2-associated polypeptide 1) (NAPP1)	ITCH	Homo sapiens (Human)	903
Q8WWA0	ITLN1_HUMAN	reviewed	Intelectin-1 (ITLN-1) (Endothelial lectin HL-1) (Galactofuranose-binding lectin) (Intestinal lactoferrin receptor) (Omentin)	ITLN1 INTL ITLN LFR UNQ640/PRO1270	Homo sapiens (Human)	313
Q9NQX7	ITM2C_HUMAN	reviewed	Integral membrane protein 2C (Cerebral protein 14) (Transmembrane protein BRI3) [Cleaved into: CT-BRI3]	ITM2C BRI3 hucep-14 NPD018 PSEC0047	Homo sapiens (Human)	267
P27930	IL1R2_HUMAN	reviewed	Interleukin-1 receptor type 2 (IL-1R-2) (IL-1RT-2) (IL-1RT2) (CD121 antigen-like family member B) (CDw121b) (IL-1 type II receptor) (Interleukin-1 receptor beta) (IL-1R-beta) (Interleukin-1 receptor type II) (CD antigen CD121b) [Cleaved into: Interleukin-1 receptor type 2, membrane form (mIL-1R2) (mIL-1RII); Interleukin-1 receptor type 2, soluble form (sIL-1R2) (sIL-1RII)]	IL1R2 IL1RB	Homo sapiens (Human)	398
P40189	IL6RB_HUMAN	reviewed	Interleukin-6 receptor subunit beta (IL-6 receptor subunit beta) (IL-6R subunit beta) (IL-6R-beta) (IL-6RB) (CDw130) (Interleukin-6 signal transducer) (Membrane glycoprotein 130) (gp130) (Oncostatin-M receptor subunit alpha) (CD antigen CD130)	IL6ST	Homo sapiens (Human)	918
O14654	IRS4_HUMAN	reviewed	Insulin receptor substrate 4 (IRS-4) (160 kDa phosphotyrosine protein) (py160) (Phosphoprotein of 160 kDa) (pp160)	IRS4	Homo sapiens (Human)	1257
P26006	ITA3_HUMAN	reviewed	Integrin alpha-3 (CD49 antigen-like family member C) (FRP-2) (Galactoprotein B3) (GAPB3) (VLA-3 subunit alpha) (CD antigen CD49c) [Cleaved into: Integrin alpha-3 heavy chain; Integrin alpha-3 light chain]	ITGA3 MSK18	Homo sapiens (Human)	1051
P16144	ITB4_HUMAN	reviewed	Integrin beta-4 (GP150) (CD antigen CD104)	ITGB4	Homo sapiens (Human)	1822
Q15040	JOS1_HUMAN	reviewed	Josephin-1 (EC 3.4.19.12) (Josephin domain-containing protein 1)	JOSD1 JSPH1 KIAA0063	Homo sapiens (Human)	202
P05106	ITB3_HUMAN	reviewed	Integrin beta-3 (Platelet membrane glycoprotein IIIa) (GPIIIa) (CD antigen CD61)	ITGB3 GP3A	Homo sapiens (Human)	788
Q5VZ72	IZUM3_HUMAN	reviewed	Izumo sperm-egg fusion protein 3	IZUMO3 C9orf134	Homo sapiens (Human)	239
P17612	KAPCA_HUMAN	reviewed	cAMP-dependent protein kinase catalytic subunit alpha (PKA C-alpha) (EC 2.7.11.11)	PRKACA PKACA	Homo sapiens (Human)	351
P48551	INAR2_HUMAN	reviewed	Interferon alpha/beta receptor 2 (IFN-R-2) (IFN-alpha binding protein) (IFN-alpha/beta receptor 2) (Interferon alpha binding protein) (Type I interferon receptor 2)	IFNAR2 IFNABR IFNARB	Homo sapiens (Human)	515
P38484	INGR2_HUMAN	reviewed	Interferon gamma receptor 2 (IFN-gamma receptor 2) (IFN-gamma-R2) (Interferon gamma receptor accessory factor 1) (AF-1) (Interferon gamma transducer 1)	IFNGR2 IFNGT1	Homo sapiens (Human)	337
Q8IWB1	IPRI_HUMAN	reviewed	Inositol 1,4,5-trisphosphate receptor-interacting protein (Protein DANGER)	ITPRIP DANGER KIAA1754	Homo sapiens (Human)	547
P46940	IQGA1_HUMAN	reviewed	Ras GTPase-activating-like protein IQGAP1 (p195)	IQGAP1 KIAA0051	Homo sapiens (Human)	1657
Q6UXK2	ISLR2_HUMAN	reviewed	Immunoglobulin superfamily containing leucine-rich repeat protein 2 (Leucine-rich repeat domain and immunoglobulin domain-containing axon extension protein)	ISLR2 KIAA1465 LINX UNQ1885/PRO4329	Homo sapiens (Human)	745
Q8WXH2	JPH3_HUMAN	reviewed	Junctophilin-3 (JP-3) (Junctophilin type 3) (Trinucleotide repeat-containing gene 22 protein)	JPH3 JP3 TNRC22	Homo sapiens (Human)	748
A6ND01	JUNO_HUMAN	reviewed	Sperm-egg fusion protein Juno (Folate receptor 4) (Folate receptor delta) (FR-delta) (IZUMO1 receptor protein JUNO)	IZUMO1R FOLR4 JUNO	Homo sapiens (Human)	250
Q6UXG2	K1324_HUMAN	reviewed	UPF0577 protein KIAA1324 (Estrogen-induced gene 121 protein)	KIAA1324 EIG121 UNQ2426/PRO4985	Homo sapiens (Human)	1013
P31321	KAP1_HUMAN	reviewed	cAMP-dependent protein kinase type I-beta regulatory subunit	PRKAR1B	Homo sapiens (Human)	381
Q9UQM7	KCC2A_HUMAN	reviewed	Calcium/calmodulin-dependent protein kinase type II subunit alpha (CaM kinase II subunit alpha) (CaMK-II subunit alpha) (EC 2.7.11.17)	CAMK2A CAMKA KIAA0968	Homo sapiens (Human)	478
Q13557	KCC2D_HUMAN	reviewed	Calcium/calmodulin-dependent protein kinase type II subunit delta (CaM kinase II subunit delta) (CaMK-II subunit delta) (EC 2.7.11.17)	CAMK2D CAMKD	Homo sapiens (Human)	499
Q6PIL6	KCIP4_HUMAN	reviewed	Kv channel-interacting protein 4 (KChIP4) (A-type potassium channel modulatory protein 4) (Calsenilin-like protein) (Potassium channel-interacting protein 4)	KCNIP4 CALP KCHIP4	Homo sapiens (Human)	250
Q9NZN1	IRPL1_HUMAN	reviewed	Interleukin-1 receptor accessory protein-like 1 (IL-1-RAPL-1) (IL-1RAPL-1) (IL1RAPL-1) (Oligophrenin-4) (Three immunoglobulin domain-containing IL-1 receptor-related 2) (TIGIRR-2) (X-linked interleukin-1 receptor accessory protein-like 1)	IL1RAPL1 OPHN4	Homo sapiens (Human)	696
P05556	ITB1_HUMAN	reviewed	Integrin beta-1 (Fibronectin receptor subunit beta) (Glycoprotein IIa) (GPIIA) (VLA-4 subunit beta) (CD antigen CD29)	ITGB1 FNRB MDF2 MSK12	Homo sapiens (Human)	798
O14713	ITBP1_HUMAN	reviewed	Integrin beta-1-binding protein 1 (Integrin cytoplasmic domain-associated protein 1) (ICAP-1)	ITGB1BP1 ICAP1	Homo sapiens (Human)	200
Q9Y624	JAM1_HUMAN	reviewed	Junctional adhesion molecule A (JAM-A) (Junctional adhesion molecule 1) (JAM-1) (Platelet F11 receptor) (Platelet adhesion molecule 1) (PAM-1) (CD antigen CD321)	F11R JAM1 JCAM UNQ264/PRO301	Homo sapiens (Human)	299
Q9BX67	JAM3_HUMAN	reviewed	Junctional adhesion molecule C (JAM-C) (JAM-2) (Junctional adhesion molecule 3) (JAM-3)	JAM3 UNQ859/PRO1868	Homo sapiens (Human)	310
Q9HDC5	JPH1_HUMAN	reviewed	Junctophilin-1 (JP-1) (Junctophilin type 1)	JPH1 JP1	Homo sapiens (Human)	661
Q09470	KCNA1_HUMAN	reviewed	Potassium voltage-gated channel subfamily A member 1 (Voltage-gated K(+) channel HuKI) (Voltage-gated potassium channel HBK1) (Voltage-gated potassium channel subunit Kv1.1)	KCNA1	Homo sapiens (Human)	495
P22459	KCNA4_HUMAN	reviewed	Potassium voltage-gated channel subfamily A member 4 (HPCN2) (Voltage-gated K(+) channel HuKII) (Voltage-gated potassium channel HBK4) (Voltage-gated potassium channel HK1) (Voltage-gated potassium channel subunit Kv1.4)	KCNA4 KCNA4L	Homo sapiens (Human)	653
P22460	KCNA5_HUMAN	reviewed	Potassium voltage-gated channel subfamily A member 5 (HPCN1) (Voltage-gated potassium channel HK2) (Voltage-gated potassium channel subunit Kv1.5)	KCNA5	Homo sapiens (Human)	613
Q14721	KCNB1_HUMAN	reviewed	Potassium voltage-gated channel subfamily B member 1 (Delayed rectifier potassium channel 1) (DRK1) (h-DRK1) (Voltage-gated potassium channel subunit Kv2.1)	KCNB1	Homo sapiens (Human)	858
O95259	KCNH1_HUMAN	reviewed	Potassium voltage-gated channel subfamily H member 1 (Ether-a-go-go potassium channel 1) (EAG channel 1) (h-eag) (hEAG1) (Voltage-gated potassium channel subunit Kv10.1)	KCNH1 EAG EAG1	Homo sapiens (Human)	989
O14649	KCNK3_HUMAN	reviewed	Potassium channel subfamily K member 3 (Acid-sensitive potassium channel protein TASK-1) (TWIK-related acid-sensitive K(+) channel 1) (Two pore potassium channel KT3.1) (Two pore K(+) channel KT3.1)	KCNK3 TASK TASK1	Homo sapiens (Human)	394
P56696	KCNQ4_HUMAN	reviewed	Potassium voltage-gated channel subfamily KQT member 4 (KQT-like 4) (Potassium channel subunit alpha KvLQT4) (Voltage-gated potassium channel subunit Kv7.4)	KCNQ4	Homo sapiens (Human)	695
Q5JUK3	KCNT1_HUMAN	reviewed	Potassium channel subfamily T member 1 (KCa4.1)	KCNT1 KIAA1422	Homo sapiens (Human)	1230
A1A4Y4	IRGM_HUMAN	reviewed	Immunity-related GTPase family M protein (EC 3.6.5.-) (Immunity-related GTPase family M protein 1) (Interferon-inducible protein 1) (LPS-stimulated RAW 264.7 macrophage protein 47 homolog) (LRG-47)	IRGM IFI1 IRGM1 LRG47	Homo sapiens (Human)	181
Q6PHW0	IYD1_HUMAN	reviewed	Iodotyrosine deiodinase 1 (IYD-1) (EC 1.21.1.1) (Iodotyrosine dehalogenase 1)	IYD C6orf71 DEHAL1	Homo sapiens (Human)	289
P31323	KAP3_HUMAN	reviewed	cAMP-dependent protein kinase type II-beta regulatory subunit	PRKAR2B	Homo sapiens (Human)	418
Q92953	KCNB2_HUMAN	reviewed	Potassium voltage-gated channel subfamily B member 2 (Voltage-gated potassium channel subunit Kv2.2)	KCNB2	Homo sapiens (Human)	911
Q14003	KCNC3_HUMAN	reviewed	Potassium voltage-gated channel subfamily C member 3 (KSHIIID) (Voltage-gated potassium channel subunit Kv3.3)	KCNC3	Homo sapiens (Human)	757
Q9UIX4	KCNG1_HUMAN	reviewed	Potassium voltage-gated channel subfamily G member 1 (Voltage-gated potassium channel subunit Kv6.1) (kH2)	KCNG1	Homo sapiens (Human)	513
O95069	KCNK2_HUMAN	reviewed	Potassium channel subfamily K member 2 (Outward rectifying potassium channel protein TREK-1) (TREK-1 K(+) channel subunit) (Two pore domain potassium channel TREK-1) (Two pore potassium channel TPKC1)	KCNK2 TREK TREK1	Homo sapiens (Human)	426
O15554	KCNN4_HUMAN	reviewed	Intermediate conductance calcium-activated potassium channel protein 4 (SK4) (SKCa 4) (SKCa4) (IKCa1) (IK1) (KCa3.1) (KCa4) (Putative Gardos channel)	KCNN4 IK1 IKCA1 KCA4 SK4	Homo sapiens (Human)	427
P23229	ITA6_HUMAN	reviewed	Integrin alpha-6 (CD49 antigen-like family member F) (VLA-6) (CD antigen CD49f) [Cleaved into: Integrin alpha-6 heavy chain; Integrin alpha-6 light chain; Processed integrin alpha-6 (Alpha6p)]	ITGA6	Homo sapiens (Human)	1130
Q9Y287	ITM2B_HUMAN	reviewed	Integral membrane protein 2B (Immature BRI2) (imBRI2) (Protein E25B) (Transmembrane protein BRI) (Bri) [Cleaved into: BRI2, membrane form (Mature BRI2) (mBRI2); BRI2 intracellular domain (BRI2 ICD); BRI2C, soluble form; Bri23 peptide (Bri2-23) (ABri23) (C-terminal peptide) (P23 peptide)]	ITM2B BRI BRI2	Homo sapiens (Human)	266
Q5VV43	K0319_HUMAN	reviewed	Dyslexia-associated protein KIAA0319	KIAA0319	Homo sapiens (Human)	1072
Q8IZA0	K319L_HUMAN	reviewed	Dyslexia-associated protein KIAA0319-like protein (Adeno-associated virus receptor) (AAVR)	KIAA0319L AAVR KIAA1837 PP791	Homo sapiens (Human)	1049
P23352	KALM_HUMAN	reviewed	Anosmin-1 (Adhesion molecule-like X-linked) (Kallmann syndrome protein)	ANOS1 ADMLX KAL KAL1 KALIG1	Homo sapiens (Human)	680
Q14678	KANK1_HUMAN	reviewed	KN motif and ankyrin repeat domain-containing protein 1 (Ankyrin repeat domain-containing protein 15) (Kidney ankyrin repeat-containing protein)	KANK1 ANKRD15 KANK KIAA0172	Homo sapiens (Human)	1352
P48730	KC1D_HUMAN	reviewed	Casein kinase I isoform delta (CKI-delta) (CKId) (EC 2.7.11.1) (Tau-protein kinase CSNK1D) (EC 2.7.11.26)	CSNK1D HCKID	Homo sapiens (Human)	415
Q13303	KCAB2_HUMAN	reviewed	Voltage-gated potassium channel subunit beta-2 (EC 1.1.1.-) (K(+) channel subunit beta-2) (Kv-beta-2) (hKvbeta2)	KCNAB2 KCNA2B KCNK2	Homo sapiens (Human)	367
Q9NZI2	KCIP1_HUMAN	reviewed	Kv channel-interacting protein 1 (KChIP1) (A-type potassium channel modulatory protein 1) (Potassium channel-interacting protein 1) (Vesicle APC-binding protein)	KCNIP1 KCHIP1 VABP	Homo sapiens (Human)	227
P78508	KCJ10_HUMAN	reviewed	ATP-sensitive inward rectifier potassium channel 10 (ATP-dependent inwardly rectifying potassium channel Kir4.1) (Inward rectifier K(+) channel Kir1.2) (Potassium channel, inwardly rectifying subfamily J member 10)	KCNJ10	Homo sapiens (Human)	379
P48547	KCNC1_HUMAN	reviewed	Potassium voltage-gated channel subfamily C member 1 (NGK2) (Voltage-gated potassium channel subunit Kv3.1) (Voltage-gated potassium channel subunit Kv4)	KCNC1	Homo sapiens (Human)	511
Q96PR1	KCNC2_HUMAN	reviewed	Potassium voltage-gated channel subfamily C member 2 (Shaw-like potassium channel) (Voltage-gated potassium channel Kv3.2)	KCNC2	Homo sapiens (Human)	638
Q96KK3	KCNS1_HUMAN	reviewed	Potassium voltage-gated channel subfamily S member 1 (Delayed-rectifier K(+) channel alpha subunit 1) (Voltage-gated potassium channel subunit Kv9.1)	KCNS1	Homo sapiens (Human)	526
P57087	JAM2_HUMAN	reviewed	Junctional adhesion molecule B (JAM-B) (Junctional adhesion molecule 2) (JAM-2) (Vascular endothelial junction-associated molecule) (VE-JAM) (CD antigen CD322)	JAM2 C21orf43 VEJAM UNQ219/PRO245	Homo sapiens (Human)	298
Q86YT9	JAML_HUMAN	reviewed	Junctional adhesion molecule-like (Adhesion molecule interacting with CXADR antigen 1) (Dendritic cell-specific protein CREA7-1)	JAML AMICA1 UNQ722/PRO1387	Homo sapiens (Human)	394
Q9BR39	JPH2_HUMAN	reviewed	Junctophilin-2 (JP-2) (Junctophilin type 2)	JPH2 JP2	Homo sapiens (Human)	696
Q96NX5	KCC1G_HUMAN	reviewed	Calcium/calmodulin-dependent protein kinase type 1G (EC 2.7.11.17) (CaM kinase I gamma) (CaM kinase IG) (CaM-KI gamma) (CaMKI gamma) (CaMKIG) (CaMK-like CREB kinase III) (CLICK III)	CAMK1G CLICK3 VWS1	Homo sapiens (Human)	476
Q68DU8	KCD16_HUMAN	reviewed	BTB/POZ domain-containing protein KCTD16 (Potassium channel tetramerization domain-containing protein 16)	KCTD16 KIAA1317	Homo sapiens (Human)	428
P22001	KCNA3_HUMAN	reviewed	Potassium voltage-gated channel subfamily A member 3 (HGK5) (HLK3) (HPCN3) (Voltage-gated K(+) channel HuKIII) (Voltage-gated potassium channel subunit Kv1.3)	KCNA3 HGK5	Homo sapiens (Human)	575
Q8TAE7	KCNG3_HUMAN	reviewed	Potassium voltage-gated channel subfamily G member 3 (Voltage-gated potassium channel subunit Kv10.1) (Voltage-gated potassium channel subunit Kv6.3)	KCNG3	Homo sapiens (Human)	436
Q7Z418	KCNKI_HUMAN	reviewed	Potassium channel subfamily K member 18 (TWIK-related individual potassium channel) (TWIK-related spinal cord potassium channel)	KCNK18 TRESK TRIK	Homo sapiens (Human)	384
Q6UWL6	KIRR2_HUMAN	reviewed	Kin of IRRE-like protein 2 (Kin of irregular chiasm-like protein 2) (Nephrin-like protein 3)	KIRREL2 NEPH3 UNQ5827/PRO19646	Homo sapiens (Human)	708
Q96JJ6	JPH4_HUMAN	reviewed	Junctophilin-4 (JP-4) (Junctophilin-like 1 protein)	JPH4 JPHL1 KIAA1831	Homo sapiens (Human)	628
P04264	K2C1_HUMAN	reviewed	Keratin, type II cytoskeletal 1 (67 kDa cytokeratin) (Cytokeratin-1) (CK-1) (Hair alpha protein) (Keratin-1) (K1) (Type-II keratin Kb1)	KRT1 KRTA	Homo sapiens (Human)	644
Q9NPI9	KCJ16_HUMAN	reviewed	Inward rectifier potassium channel 16 (Inward rectifier K(+) channel Kir5.1) (Potassium channel, inwardly rectifying subfamily J member 16)	KCNJ16	Homo sapiens (Human)	418
P17658	KCNA6_HUMAN	reviewed	Potassium voltage-gated channel subfamily A member 6 (Voltage-gated potassium channel HBK2) (Voltage-gated potassium channel subunit Kv1.6)	KCNA6	Homo sapiens (Human)	529
Q9UK17	KCND3_HUMAN	reviewed	Potassium voltage-gated channel subfamily D member 3 (Voltage-gated potassium channel subunit Kv4.3)	KCND3	Homo sapiens (Human)	655
Q9Y6J6	KCNE2_HUMAN	reviewed	Potassium voltage-gated channel subfamily E member 2 (MinK-related peptide 1) (Minimum potassium ion channel-related peptide 1) (Potassium channel subunit beta MiRP1)	KCNE2	Homo sapiens (Human)	123
P48048	KCNJ1_HUMAN	reviewed	ATP-sensitive inward rectifier potassium channel 1 (ATP-regulated potassium channel ROM-K) (Inward rectifier K(+) channel Kir1.1) (Potassium channel, inwardly rectifying subfamily J member 1)	KCNJ1 ROMK1	Homo sapiens (Human)	391
O00180	KCNK1_HUMAN	reviewed	Potassium channel subfamily K member 1 (Inward rectifying potassium channel protein TWIK-1) (Potassium channel K2P1) (Potassium channel KCNO1)	KCNK1 HOHO1 KCNO1 TWIK1	Homo sapiens (Human)	336
Q9NYG8	KCNK4_HUMAN	reviewed	Potassium channel subfamily K member 4 (TWIK-related arachidonic acid-stimulated potassium channel protein) (TRAAK) (Two pore potassium channel KT4.1) (Two pore K(+) channel KT4.1)	KCNK4 TRAAK	Homo sapiens (Human)	393
Q6UVM3	KCNT2_HUMAN	reviewed	Potassium channel subfamily T member 2 (Sequence like an intermediate conductance potassium channel subunit) (Sodium and chloride-activated ATP-sensitive potassium channel Slo2.1)	KCNT2 SLICK	Homo sapiens (Human)	1135
Q96MP8	KCTD7_HUMAN	reviewed	BTB/POZ domain-containing protein KCTD7	KCTD7	Homo sapiens (Human)	289
P23276	KELL_HUMAN	reviewed	Kell blood group glycoprotein (EC 3.4.24.-) (CD antigen CD238)	KEL	Homo sapiens (Human)	732
Q969F8	KISSR_HUMAN	reviewed	KiSS-1 receptor (KiSS-1R) (G-protein coupled receptor 54) (G-protein coupled receptor OT7T175) (hOT7T175) (Hypogonadotropin-1) (Kisspeptins receptor) (Metastin receptor)	KISS1R AXOR12 GPR54	Homo sapiens (Human)	398
Q5H943	KKLC1_HUMAN	reviewed	Kita-kyushu lung cancer antigen 1 (KK-LC-1) (Cancer/testis antigen 83)	CT83 CXorf61 KKLC1	Homo sapiens (Human)	113
Q8IZD2	KMT2E_HUMAN	reviewed	Histone-lysine N-methyltransferase 2E (Lysine N-methyltransferase 2E) (EC 2.1.1.43) (Myeloid/lymphoid or mixed-lineage leukemia protein 5)	KMT2E MLL5	Homo sapiens (Human)	1858
P05129	KPCG_HUMAN	reviewed	Protein kinase C gamma type (PKC-gamma) (EC 2.7.11.13)	PRKCG PKCG	Homo sapiens (Human)	697
P10644	KAP0_HUMAN	reviewed	cAMP-dependent protein kinase type I-alpha regulatory subunit (Tissue-specific extinguisher 1) (TSE1) [Cleaved into: cAMP-dependent protein kinase type I-alpha regulatory subunit, N-terminally processed]	PRKAR1A PKR1 PRKAR1 TSE1	Homo sapiens (Human)	381
P13861	KAP2_HUMAN	reviewed	cAMP-dependent protein kinase type II-alpha regulatory subunit	PRKAR2A PKR2 PRKAR2	Homo sapiens (Human)	404
P22694	KAPCB_HUMAN	reviewed	cAMP-dependent protein kinase catalytic subunit beta (PKA C-beta) (EC 2.7.11.11)	PRKACB	Homo sapiens (Human)	351
Q96CX2	KCD12_HUMAN	reviewed	BTB/POZ domain-containing protein KCTD12 (Pfetin) (Predominantly fetal expressed T1 domain)	KCTD12 C13orf2 KIAA1778 PFET1	Homo sapiens (Human)	325
Q14500	KCJ12_HUMAN	reviewed	ATP-sensitive inward rectifier potassium channel 12 (Inward rectifier K(+) channel Kir2.2) (IRK-2) (Inward rectifier K(+) channel Kir2.2v) (Potassium channel, inwardly rectifying subfamily J member 12)	KCNJ12 IRK2 KCNJN1	Homo sapiens (Human)	433
B7U540	KCJ18_HUMAN	reviewed	Inward rectifier potassium channel 18 (Inward rectifier K(+) channel Kir2.6) (Potassium channel, inwardly rectifying subfamily J member 18)	KCNJ18	Homo sapiens (Human)	433
Q12791	KCMA1_HUMAN	reviewed	Calcium-activated potassium channel subunit alpha-1 (BK channel) (BKCA alpha) (Calcium-activated potassium channel, subfamily M subunit alpha-1) (K(VCA)alpha) (KCa1.1) (Maxi K channel) (MaxiK) (Slo-alpha) (Slo1) (Slowpoke homolog) (Slo homolog) (hSlo)	KCNMA1 KCNMA SLO	Homo sapiens (Human)	1236
P16389	KCNA2_HUMAN	reviewed	Potassium voltage-gated channel subfamily A member 2 (NGK1) (Voltage-gated K(+) channel HuKIV) (Voltage-gated potassium channel HBK5) (Voltage-gated potassium channel subunit Kv1.2)	KCNA2	Homo sapiens (Human)	499
Q9NZV8	KCND2_HUMAN	reviewed	Potassium voltage-gated channel subfamily D member 2 (Voltage-gated potassium channel subunit Kv4.2)	KCND2 KIAA1044	Homo sapiens (Human)	630
Q9Y6H6	KCNE3_HUMAN	reviewed	Potassium voltage-gated channel subfamily E member 3 (MinK-related peptide 2) (Minimum potassium ion channel-related peptide 2) (Potassium channel subunit beta MiRP2)	KCNE3	Homo sapiens (Human)	103
Q8TDN1	KCNG4_HUMAN	reviewed	Potassium voltage-gated channel subfamily G member 4 (Voltage-gated potassium channel subunit Kv6.4)	KCNG4 KCNG3	Homo sapiens (Human)	519
Q9NPC2	KCNK9_HUMAN	reviewed	Potassium channel subfamily K member 9 (Acid-sensitive potassium channel protein TASK-3) (TWIK-related acid-sensitive K(+) channel 3) (Two pore potassium channel KT3.2) (Two pore K(+) channel KT3.2)	KCNK9 TASK3	Homo sapiens (Human)	374
Q9ULS6	KCNS2_HUMAN	reviewed	Potassium voltage-gated channel subfamily S member 2 (Delayed-rectifier K(+) channel alpha subunit 2) (Voltage-gated potassium channel subunit Kv9.2)	KCNS2 KIAA1144	Homo sapiens (Human)	477
Q13237	KGP2_HUMAN	reviewed	cGMP-dependent protein kinase 2 (cGK 2) (cGK2) (EC 2.7.11.12) (cGMP-dependent protein kinase II) (cGKII)	PRKG2 PRKGR2	Homo sapiens (Human)	762
Q8NHK3	KI2LB_HUMAN	reviewed	Killer cell immunoglobulin-like receptor 2DL5B (CD158 antigen-like family member F2) (Killer cell immunoglobulin-like receptor 2DLX) (CD antigen CD158f2)	KIR2DL5B CD158F CD158F2 KIR2DL5 KIR2DLX	Homo sapiens (Human)	375
Q14952	KI2S3_HUMAN	reviewed	Killer cell immunoglobulin-like receptor 2DS3 (MHC class I NK cell receptor) (Natural killer-associated transcript 7) (NKAT-7)	KIR2DS3 NKAT7	Homo sapiens (Human)	304
Q14943	KI3S1_HUMAN	reviewed	Killer cell immunoglobulin-like receptor 3DS1 (MHC class I NK cell receptor) (Natural killer-associated transcript 10) (NKAT-10)	KIR3DS1 NKAT10	Homo sapiens (Human)	387
P46019	KPB2_HUMAN	reviewed	Phosphorylase b kinase regulatory subunit alpha, liver isoform (Phosphorylase kinase alpha L subunit)	PHKA2 PHKLA PYK	Homo sapiens (Human)	1235
Q14722	KCAB1_HUMAN	reviewed	Voltage-gated potassium channel subunit beta-1 (EC 1.1.1.-) (K(+) channel subunit beta-1) (Kv-beta-1)	KCNAB1 KCNA1B	Homo sapiens (Human)	419
Q9NS61	KCIP2_HUMAN	reviewed	Kv channel-interacting protein 2 (KChIP2) (A-type potassium channel modulatory protein 2) (Cardiac voltage-gated potassium channel modulatory subunit) (Potassium channel-interacting protein 2)	KCNIP2 KCHIP2	Homo sapiens (Human)	270
P15382	KCNE1_HUMAN	reviewed	Potassium voltage-gated channel subfamily E member 1 (Delayed rectifier potassium channel subunit IsK) (IKs producing slow voltage-gated potassium channel subunit beta Mink) (Minimal potassium channel)	KCNE1	Homo sapiens (Human)	129
P48050	KCNJ4_HUMAN	reviewed	Inward rectifier potassium channel 4 (HIRK2) (HRK1) (Hippocampal inward rectifier) (HIR) (Inward rectifier K(+) channel Kir2.3) (IRK-3) (Potassium channel, inwardly rectifying subfamily J member 4)	KCNJ4 IRK3	Homo sapiens (Human)	445
A8MYU2	KCNU1_HUMAN	reviewed	Potassium channel subfamily U member 1 (Calcium-activated potassium channel subunit alpha-3) (Calcium-activated potassium channel, subfamily M subunit alpha-3) (KCa5) (Slowpoke homolog 3)	KCNU1 KCNMA3 KCNMC1 SLO3	Homo sapiens (Human)	1149
Q6PIU1	KCNV1_HUMAN	reviewed	Potassium voltage-gated channel subfamily V member 1 (Neuronal potassium channel alpha subunit HNKA) (Voltage-gated potassium channel subunit Kv8.1)	KCNV1	Homo sapiens (Human)	500
P43626	KI2L1_HUMAN	reviewed	Killer cell immunoglobulin-like receptor 2DL1 (CD158 antigen-like family member A) (MHC class I NK cell receptor) (Natural killer-associated transcript 1) (NKAT-1) (p58 natural killer cell receptor clones CL-42/47.11) (p58 NK receptor CL-42/47.11) (p58.1 MHC class-I-specific NK receptor) (CD antigen CD158a)	KIR2DL1 CD158A NKAT1	Homo sapiens (Human)	348
Q99706	KI2L4_HUMAN	reviewed	Killer cell immunoglobulin-like receptor 2DL4 (CD158 antigen-like family member D) (G9P) (Killer cell inhibitory receptor 103AS) (KIR-103AS) (MHC class I NK cell receptor KIR103AS) (CD antigen CD158d)	KIR2DL4 CD158D KIR103AS	Homo sapiens (Human)	377
P43632	KI2S4_HUMAN	reviewed	Killer cell immunoglobulin-like receptor 2DS4 (CD158 antigen-like family member I) (MHC class I NK cell receptor) (Natural killer-associated transcript 8) (NKAT-8) (P58 natural killer cell receptor clones CL-39/CL-17) (p58 NK receptor CL-39/CL-17) (CD antigen CD158i)	KIR2DS4 CD158I KKA3 NKAT8	Homo sapiens (Human)	304
Q8IZU9	KIRR3_HUMAN	reviewed	Kin of IRRE-like protein 3 (Kin of irregular chiasm-like protein 3) (Nephrin-like protein 2) [Cleaved into: Processed kin of IRRE-like protein 3]	KIRREL3 KIAA1867 NEPH2 UNQ5923/PRO4502/PRO19814	Homo sapiens (Human)	778
P17252	KPCA_HUMAN	reviewed	Protein kinase C alpha type (PKC-A) (PKC-alpha) (EC 2.7.11.13)	PRKCA PKCA PRKACA	Homo sapiens (Human)	672
Q9BZL6	KPCD2_HUMAN	reviewed	Serine/threonine-protein kinase D2 (EC 2.7.11.13) (nPKC-D2)	PRKD2 PKD2 HSPC187	Homo sapiens (Human)	878
Q05655	KPCD_HUMAN	reviewed	Protein kinase C delta type (EC 2.7.11.13) (Tyrosine-protein kinase PRKCD) (EC 2.7.10.2) (nPKC-delta) [Cleaved into: Protein kinase C delta type regulatory subunit; Protein kinase C delta type catalytic subunit (Sphingosine-dependent protein kinase-1) (SDK1)]	PRKCD	Homo sapiens (Human)	676
P32004	L1CAM_HUMAN	reviewed	Neural cell adhesion molecule L1 (N-CAM-L1) (NCAM-L1) (CD antigen CD171)	L1CAM CAML1 MIC5	Homo sapiens (Human)	1257
Q6GTX8	LAIR1_HUMAN	reviewed	Leukocyte-associated immunoglobulin-like receptor 1 (LAIR-1) (hLAIR1) (CD antigen CD305)	LAIR1 CD305	Homo sapiens (Human)	287
Q9UHI5	LAT2_HUMAN	reviewed	Large neutral amino acids transporter small subunit 2 (L-type amino acid transporter 2) (hLAT2) (Solute carrier family 7 member 8)	SLC7A8 LAT2	Homo sapiens (Human)	535
Q8IWV1	LAX1_HUMAN	reviewed	Lymphocyte transmembrane adapter 1 (Linker for activation of X cells) (Membrane-associated adapter protein LAX)	LAX1 LAX	Homo sapiens (Human)	398
Q9BQ31	KCNS3_HUMAN	reviewed	Potassium voltage-gated channel subfamily S member 3 (Delayed-rectifier K(+) channel alpha subunit 3) (Voltage-gated potassium channel subunit Kv9.3)	KCNS3	Homo sapiens (Human)	491
Q8TDN2	KCNV2_HUMAN	reviewed	Potassium voltage-gated channel subfamily V member 2 (Voltage-gated potassium channel subunit Kv8.2)	KCNV2	Homo sapiens (Human)	545
Q6ZWB6	KCTD8_HUMAN	reviewed	BTB/POZ domain-containing protein KCTD8	KCTD8	Homo sapiens (Human)	473
P43628	KI2L3_HUMAN	reviewed	Killer cell immunoglobulin-like receptor 2DL3 (CD158 antigen-like family member B2) (KIR-023GB) (Killer inhibitory receptor cl 2-3) (MHC class I NK cell receptor) (NKAT2a) (NKAT2b) (Natural killer-associated transcript 2) (NKAT-2) (p58 natural killer cell receptor clone CL-6) (p58 NK receptor CL-6) (p58.2 MHC class-I-specific NK receptor) (CD antigen CD158b2)	KIR2DL3 CD158B2 KIRCL23 NKAT2	Homo sapiens (Human)	341
Q14954	KI2S1_HUMAN	reviewed	Killer cell immunoglobulin-like receptor 2DS1 (CD158 antigen-like family member H) (MHC class I NK cell receptor Eb6 ActI) (CD antigen CD158h)	KIR2DS1 CD158H	Homo sapiens (Human)	304
Q14953	KI2S5_HUMAN	reviewed	Killer cell immunoglobulin-like receptor 2DS5 (CD158 antigen-like family member G) (MHC class I NK cell receptor) (Natural killer-associated transcript 9) (NKAT-9) (CD antigen CD158g)	KIR2DS5 CD158G NKAT9	Homo sapiens (Human)	304
P43629	KI3L1_HUMAN	reviewed	Killer cell immunoglobulin-like receptor 3DL1 (CD158 antigen-like family member E) (HLA-BW4-specific inhibitory NK cell receptor) (MHC class I NK cell receptor) (Natural killer-associated transcript 3) (NKAT-3) (p70 natural killer cell receptor clones CL-2/CL-11) (p70 NK receptor CL-2/CL-11) (CD antigen CD158e)	KIR3DL1 CD158E NKAT3 NKB1	Homo sapiens (Human)	444
Q8N743	KI3L3_HUMAN	reviewed	Killer cell immunoglobulin-like receptor 3DL3 (CD158 antigen-like family member Z) (Killer cell inhibitory receptor 1) (CD antigen CD158z)	KIR3DL3 CD158Z KIR3DL7 KIRC1	Homo sapiens (Human)	410
Q8IX03	KIBRA_HUMAN	reviewed	Protein KIBRA (HBeAg-binding protein 3) (Kidney and brain protein) (KIBRA) (WW domain-containing protein 1)	WWC1 KIAA0869	Homo sapiens (Human)	1113
Q96J84	KIRR1_HUMAN	reviewed	Kin of IRRE-like protein 1 (Kin of irregular chiasm-like protein 1) (Nephrin-like protein 1)	KIRREL KIRREL1 NEPH1	Homo sapiens (Human)	757
Q96E93	KLRG1_HUMAN	reviewed	Killer cell lectin-like receptor subfamily G member 1 (C-type lectin domain family 15 member A) (ITIM-containing receptor MAFA-L) (MAFA-like receptor) (Mast cell function-associated antigen)	KLRG1 CLEC15A MAFA MAFAL	Homo sapiens (Human)	195
P46020	KPB1_HUMAN	reviewed	Phosphorylase b kinase regulatory subunit alpha, skeletal muscle isoform (Phosphorylase kinase alpha M subunit)	PHKA1 PHKA	Homo sapiens (Human)	1223
Q96RT1	LAP2_HUMAN	reviewed	Protein LAP2 (Densin-180-like protein) (Erbb2-interacting protein) (Erbin)	ERBB2IP ERBIN KIAA1225 LAP2	Homo sapiens (Human)	1412
Q86UK5	LBN_HUMAN	reviewed	Limbin (Ellis-van Creveld syndrome protein 2) (EVC2)	EVC2 LBN	Homo sapiens (Human)	1308
Q9UIQ6	LCAP_HUMAN	reviewed	Leucyl-cystinyl aminopeptidase (Cystinyl aminopeptidase) (EC 3.4.11.3) (Insulin-regulated membrane aminopeptidase) (Insulin-responsive aminopeptidase) (IRAP) (Oxytocinase) (OTase) (Placental leucine aminopeptidase) (P-LAP) [Cleaved into: Leucyl-cystinyl aminopeptidase, pregnancy serum form]	LNPEP OTASE	Homo sapiens (Human)	1025
P43627	KI2L2_HUMAN	reviewed	Killer cell immunoglobulin-like receptor 2DL2 (CD158 antigen-like family member B1) (MHC class I NK cell receptor) (Natural killer-associated transcript 6) (NKAT-6) (p58 natural killer cell receptor clone CL-43) (p58 NK receptor CL-43) (CD antigen CD158b1)	KIR2DL2 CD158B1 NKAT6	Homo sapiens (Human)	348
Q8N109	KI2LA_HUMAN	reviewed	Killer cell immunoglobulin-like receptor 2DL5A (CD antigen CD158f1)	KIR2DL5A CD158F CD158F1 KIR2DL5	Homo sapiens (Human)	375
P43631	KI2S2_HUMAN	reviewed	Killer cell immunoglobulin-like receptor 2DS2 (CD158 antigen-like family member J) (MHC class I NK cell receptor) (NK receptor 183 ActI) (Natural killer-associated transcript 5) (NKAT-5) (p58 natural killer cell receptor clone CL-49) (p58 NK receptor CL-49) (CD antigen CD158j)	KIR2DS2 CD158J NKAT5	Homo sapiens (Human)	304
P43630	KI3L2_HUMAN	reviewed	Killer cell immunoglobulin-like receptor 3DL2 (CD158 antigen-like family member K) (MHC class I NK cell receptor) (Natural killer-associated transcript 4) (NKAT-4) (p70 natural killer cell receptor clone CL-5) (p70 NK receptor CL-5) (CD antigen CD158k)	KIR3DL2 CD158K NKAT4	Homo sapiens (Human)	455
Q6TDP4	KLH17_HUMAN	reviewed	Kelch-like protein 17 (Actinfilin)	KLHL17	Homo sapiens (Human)	642
Q15139	KPCD1_HUMAN	reviewed	Serine/threonine-protein kinase D1 (EC 2.7.11.13) (Protein kinase C mu type) (Protein kinase D) (nPKC-D1) (nPKC-mu)	PRKD1 PKD PKD1 PRKCM	Homo sapiens (Human)	912
P11279	LAMP1_HUMAN	reviewed	Lysosome-associated membrane glycoprotein 1 (LAMP-1) (Lysosome-associated membrane protein 1) (CD107 antigen-like family member A) (CD antigen CD107a)	LAMP1	Homo sapiens (Human)	417
P13473	LAMP2_HUMAN	reviewed	Lysosome-associated membrane glycoprotein 2 (LAMP-2) (Lysosome-associated membrane protein 2) (CD107 antigen-like family member B) (CD antigen CD107b)	LAMP2	Homo sapiens (Human)	410
D3W0D1	KLRF2_HUMAN	reviewed	Killer cell lectin-like receptor subfamily F member 2 (Lectin-like receptor F2) (Activating coreceptor NKp65)	KLRF2	Homo sapiens (Human)	207
Q93100	KPBB_HUMAN	reviewed	Phosphorylase b kinase regulatory subunit beta (Phosphorylase kinase subunit beta)	PHKB	Homo sapiens (Human)	1093
Q02156	KPCE_HUMAN	reviewed	Protein kinase C epsilon type (EC 2.7.11.13) (nPKC-epsilon)	PRKCE PKCE	Homo sapiens (Human)	737
Q04759	KPCT_HUMAN	reviewed	Protein kinase C theta type (EC 2.7.11.13) (nPKC-theta)	PRKCQ PRKCT	Homo sapiens (Human)	706
P11801	KPSH1_HUMAN	reviewed	Serine/threonine-protein kinase H1 (EC 2.7.11.1) (Protein serine kinase H1) (PSK-H1)	PSKH1	Homo sapiens (Human)	424
Q8IVT5	KSR1_HUMAN	reviewed	Kinase suppressor of Ras 1	KSR1 KSR	Homo sapiens (Human)	923
P43405	KSYK_HUMAN	reviewed	Tyrosine-protein kinase SYK (EC 2.7.10.2) (Spleen tyrosine kinase) (p72-Syk)	SYK	Homo sapiens (Human)	635
O43813	LANC1_HUMAN	reviewed	LanC-like protein 1 (40 kDa erythrocyte membrane protein) (p40)	LANCL1 GPR69A	Homo sapiens (Human)	399
Q9NS86	LANC2_HUMAN	reviewed	LanC-like protein 2 (Testis-specific adriamycin sensitivity protein)	LANCL2 GPR69B TASP	Homo sapiens (Human)	450
Q86Z14	KLOTB_HUMAN	reviewed	Beta-klotho (BKL) (BetaKlotho) (Klotho beta-like protein)	KLB	Homo sapiens (Human)	1044
Q9UEF7	KLOT_HUMAN	reviewed	Klotho (EC 3.2.1.31) [Cleaved into: Klotho peptide]	KL	Homo sapiens (Human)	1012
Q9UJQ1	LAMP5_HUMAN	reviewed	Lysosome-associated membrane glycoprotein 5 (Brain and dendritic cell-associated LAMP) (Brain-associated LAMP-like protein) (BAD-LAMP) (Lysosome-associated membrane protein 5) (LAMP-5)	LAMP5 C20orf103	Homo sapiens (Human)	280
P19256	LFA3_HUMAN	reviewed	Lymphocyte function-associated antigen 3 (Ag3) (Surface glycoprotein LFA-3) (CD antigen CD58)	CD58 LFA3	Homo sapiens (Human)	250
O00522	KRIT1_HUMAN	reviewed	Krev interaction trapped protein 1 (Krev interaction trapped 1) (Cerebral cavernous malformations 1 protein)	KRIT1 CCM1	Homo sapiens (Human)	736
P48357	LEPR_HUMAN	reviewed	Leptin receptor (LEP-R) (HuB219) (OB receptor) (OB-R) (CD antigen CD295)	LEPR DB OBR	Homo sapiens (Human)	1165
Q05469	LIPS_HUMAN	reviewed	Hormone-sensitive lipase (HSL) (EC 3.1.1.79)	LIPE	Homo sapiens (Human)	1076
A6NI73	LIRA5_HUMAN	reviewed	Leukocyte immunoglobulin-like receptor subfamily A member 5 (CD85 antigen-like family member F) (Immunoglobulin-like transcript 11) (ILT-11) (Leukocyte immunoglobulin-like receptor 9) (LIR-9) (CD antigen CD85f)	LILRA5 ILT11 LILRB7 LIR9	Homo sapiens (Human)	299
O43561	LAT_HUMAN	reviewed	Linker for activation of T-cells family member 1 (36 kDa phospho-tyrosine adapter protein) (pp36) (p36-38)	LAT	Homo sapiens (Human)	262
P42702	LIFR_HUMAN	reviewed	Leukemia inhibitory factor receptor (LIF receptor) (LIF-R) (CD antigen CD118)	LIFR	Homo sapiens (Human)	1097
O75022	LIRB3_HUMAN	reviewed	Leukocyte immunoglobulin-like receptor subfamily B member 3 (LIR-3) (Leukocyte immunoglobulin-like receptor 3) (CD85 antigen-like family member A) (Immunoglobulin-like transcript 5) (ILT-5) (Monocyte inhibitory receptor HL9) (CD antigen CD85a)	LILRB3 ILT5 LIR3	Homo sapiens (Human)	631
Q01650	LAT1_HUMAN	reviewed	Large neutral amino acids transporter small subunit 1 (4F2 light chain) (4F2 LC) (4F2LC) (CD98 light chain) (Integral membrane protein E16) (L-type amino acid transporter 1) (hLAT1) (Solute carrier family 7 member 5) (y+ system cationic amino acid transporter)	SLC7A5 CD98LC LAT1 MPE16	Homo sapiens (Human)	507
Q9BWQ8	LFG2_HUMAN	reviewed	Protein lifeguard 2 (Fas apoptotic inhibitory molecule 2) (Neural membrane protein 35) (Transmembrane BAX inhibitor motif-containing protein 2)	FAIM2 KIAA0950 LFG LFG2 NMP35 TMBIM2	Homo sapiens (Human)	316
P06858	LIPL_HUMAN	reviewed	Lipoprotein lipase (LPL) (EC 3.1.1.34)	LPL LIPD	Homo sapiens (Human)	475
Q92633	LPAR1_HUMAN	reviewed	Lysophosphatidic acid receptor 1 (LPA receptor 1) (LPA-1) (Lysophosphatidic acid receptor Edg-2)	LPAR1 EDG2 LPA1	Homo sapiens (Human)	364
P09848	LPH_HUMAN	reviewed	Lactase-phlorizin hydrolase (Lactase-glycosylceramidase) [Includes: Lactase (EC 3.2.1.108); Phlorizin hydrolase (EC 3.2.1.62)]	LCT LPH	Homo sapiens (Human)	1927
P06239	LCK_HUMAN	reviewed	Tyrosine-protein kinase Lck (EC 2.7.10.2) (Leukocyte C-terminal Src kinase) (LSK) (Lymphocyte cell-specific protein-tyrosine kinase) (Protein YT16) (Proto-oncogene Lck) (T cell-specific protein-tyrosine kinase) (p56-LCK)	LCK	Homo sapiens (Human)	509
O75473	LGR5_HUMAN	reviewed	Leucine-rich repeat-containing G-protein coupled receptor 5 (G-protein coupled receptor 49) (G-protein coupled receptor 67) (G-protein coupled receptor HG38)	LGR5 GPR49 GPR67	Homo sapiens (Human)	907
Q9HBX8	LGR6_HUMAN	reviewed	Leucine-rich repeat-containing G-protein coupled receptor 6	LGR6 UNQ6427/PRO21331 VTS20631	Homo sapiens (Human)	967
Q96FE5	LIGO1_HUMAN	reviewed	Leucine-rich repeat and immunoglobulin-like domain-containing nogo receptor-interacting protein 1 (Leucine-rich repeat and immunoglobulin domain-containing protein 1) (Leucine-rich repeat neuronal protein 1) (Leucine-rich repeat neuronal protein 6A)	LINGO1 LERN1 LRRN6A UNQ201/PRO227	Homo sapiens (Human)	620
Q9H400	LIME1_HUMAN	reviewed	Lck-interacting transmembrane adapter 1 (Lck-interacting membrane protein) (Lck-interacting molecule)	LIME1 LIME LP8067	Homo sapiens (Human)	295
P48059	LIMS1_HUMAN	reviewed	LIM and senescent cell antigen-like-containing domain protein 1 (Particularly interesting new Cys-His protein 1) (PINCH-1) (Renal carcinoma antigen NY-REN-48)	LIMS1 PINCH PINCH1	Homo sapiens (Human)	325
Q9UBY5	LPAR3_HUMAN	reviewed	Lysophosphatidic acid receptor 3 (LPA receptor 3) (LPA-3) (Lysophosphatidic acid receptor Edg-7)	LPAR3 EDG7 LPA3	Homo sapiens (Human)	353
Q5VT99	LRC38_HUMAN	reviewed	Leucine-rich repeat-containing protein 38 (BK channel auxiliary gamma subunit LRRC38)	LRRC38	Homo sapiens (Human)	294
Q6ZSA7	LRC55_HUMAN	reviewed	Leucine-rich repeat-containing protein 55 (BK channel auxiliary gamma subunit LRRC55)	LRRC55	Homo sapiens (Human)	311
Q8TDW0	LRC8C_HUMAN	reviewed	Volume-regulated anion channel subunit LRRC8C (Factor for adipocyte differentiation 158) (Leucine-rich repeat-containing protein 8C)	LRRC8C AD158 FAD158	Homo sapiens (Human)	803
O14910	LIN7A_HUMAN	reviewed	Protein lin-7 homolog A (Lin-7A) (hLin-7) (Mammalian lin-seven protein 1) (MALS-1) (Tax interaction protein 33) (TIP-33) (Vertebrate lin-7 homolog 1) (Veli-1)	LIN7A MALS1 VELI1	Homo sapiens (Human)	233
Q9HBW0	LPAR2_HUMAN	reviewed	Lysophosphatidic acid receptor 2 (LPA receptor 2) (LPA-2) (Lysophosphatidic acid receptor Edg-4)	LPAR2 EDG4 LPA2	Homo sapiens (Human)	351
Q9H1C0	LPAR5_HUMAN	reviewed	Lysophosphatidic acid receptor 5 (LPA receptor 5) (LPA-5) (G-protein coupled receptor 92) (G-protein coupled receptor 93)	LPAR5 GPR92 GPR93	Homo sapiens (Human)	372
P43657	LPAR6_HUMAN	reviewed	Lysophosphatidic acid receptor 6 (LPA receptor 6) (LPA-6) (Oleoyl-L-alpha-lysophosphatidic acid receptor) (P2Y purinoceptor 5) (P2Y5) (Purinergic receptor 5) (RB intron encoded G-protein coupled receptor)	LPAR6 P2RY5	Homo sapiens (Human)	344
Q9NPC1	LT4R2_HUMAN	reviewed	Leukotriene B4 receptor 2 (LTB4-R 2) (LTB4-R2) (LTB4 receptor JULF2) (Leukotriene B4 receptor BLT2) (Seven transmembrane receptor BLTR2)	LTB4R2 BLT2R BLTR2	Homo sapiens (Human)	389
Q7Z4I7	LIMS2_HUMAN	reviewed	LIM and senescent cell antigen-like-containing domain protein 2 (LIM-like protein 2) (Particularly interesting new Cys-His protein 2) (PINCH-2)	LIMS2 PINCH2	Homo sapiens (Human)	341
Q9HAP6	LIN7B_HUMAN	reviewed	Protein lin-7 homolog B (Lin-7B) (hLin7B) (Mammalian lin-seven protein 2) (MALS-2) (Vertebrate lin-7 homolog 2) (Veli-2) (hVeli2)	LIN7B MALS2 VELI2 UNQ3116/PRO10200	Homo sapiens (Human)	207
Q8NHL6	LIRB1_HUMAN	reviewed	Leukocyte immunoglobulin-like receptor subfamily B member 1 (LIR-1) (Leukocyte immunoglobulin-like receptor 1) (CD85 antigen-like family member J) (Immunoglobulin-like transcript 2) (ILT-2) (Monocyte/macrophage immunoglobulin-like receptor 7) (MIR-7) (CD antigen CD85j)	LILRB1 ILT2 LIR1 MIR7	Homo sapiens (Human)	650
P50851	LRBA_HUMAN	reviewed	Lipopolysaccharide-responsive and beige-like anchor protein (Beige-like protein) (CDC4-like protein)	LRBA BGL CDC4L LBA	Homo sapiens (Human)	2863
Q9NT99	LRC4B_HUMAN	reviewed	Leucine-rich repeat-containing protein 4B (Netrin-G3 ligand) (NGL-3)	LRRC4B LRIG4	Homo sapiens (Human)	713
Q9HCJ2	LRC4C_HUMAN	reviewed	Leucine-rich repeat-containing protein 4C (Netrin-G1 ligand) (NGL-1)	LRRC4C KIAA1580 NGL1 UNQ292/PRO331	Homo sapiens (Human)	640
Q8N7C0	LRC52_HUMAN	reviewed	Leucine-rich repeat-containing protein 52 (BK channel auxiliary gamma subunit LRRC52)	LRRC52	Homo sapiens (Human)	313
Q86X29	LSR_HUMAN	reviewed	Lipolysis-stimulated lipoprotein receptor	LSR LISCH	Homo sapiens (Human)	649
O95867	LY66C_HUMAN	reviewed	Lymphocyte antigen 6 complex locus protein G6c	LY6G6C C6orf24 G6C NG24 UNQ1947/PRO4430	Homo sapiens (Human)	125
O94772	LY6H_HUMAN	reviewed	Lymphocyte antigen 6H (Ly-6H)	LY6H	Homo sapiens (Human)	140
Q9HBG7	LY9_HUMAN	reviewed	T-lymphocyte surface antigen Ly-9 (Cell surface molecule Ly-9) (Lymphocyte antigen 9) (SLAM family member 3) (SLAMF3) (Signaling lymphocytic activation molecule 3) (CD antigen CD229)	LY9 CDABP0070	Homo sapiens (Human)	655
O95274	LYPD3_HUMAN	reviewed	Ly6/PLAUR domain-containing protein 3 (GPI-anchored metastasis-associated protein C4.4A homolog) (Matrigel-induced gene C4 protein) (MIG-C4)	LYPD3 C4.4A UNQ491/PRO1007	Homo sapiens (Human)	346
Q9BXB1	LGR4_HUMAN	reviewed	Leucine-rich repeat-containing G-protein coupled receptor 4 (G-protein coupled receptor 48)	LGR4 GPR48	Homo sapiens (Human)	951
Q9NUP9	LIN7C_HUMAN	reviewed	Protein lin-7 homolog C (Lin-7C) (Mammalian lin-seven protein 3) (MALS-3) (Vertebrate lin-7 homolog 3) (Veli-3)	LIN7C MALS3 VELI3	Homo sapiens (Human)	197
Q2I0M4	LRC26_HUMAN	reviewed	Leucine-rich repeat-containing protein 26 (BK channel auxiliary gamma subunit LRRC26) (Cytokeratin-associated protein in cancer)	LRRC26 CAPC	Homo sapiens (Human)	334
Q6P9F7	LRC8B_HUMAN	reviewed	Volume-regulated anion channel subunit LRRC8B (Leucine-rich repeat-containing protein 8B) (T-cell activation leucine repeat-rich protein) (TA-LRRP)	LRRC8B KIAA0231 UNQ6413/PRO21207	Homo sapiens (Human)	803
Q9P244	LRFN1_HUMAN	reviewed	Leucine-rich repeat and fibronectin type III domain-containing protein 1 (Synaptic adhesion-like molecule 2)	LRFN1 KIAA1484 SALM2	Homo sapiens (Human)	771
Q9ULH4	LRFN2_HUMAN	reviewed	Leucine-rich repeat and fibronectin type-III domain-containing protein 2 (Synaptic adhesion-like molecule 1)	LRFN2 KIAA1246 SALM1	Homo sapiens (Human)	789
Q9BTN0	LRFN3_HUMAN	reviewed	Leucine-rich repeat and fibronectin type-III domain-containing protein 3 (Synaptic adhesion-like molecule 4)	LRFN3 SALM4 UNQ5865/PRO34192	Homo sapiens (Human)	628
O94898	LRIG2_HUMAN	reviewed	Leucine-rich repeats and immunoglobulin-like domains protein 2 (LIG-2)	LRIG2 KIAA0806 LIG2	Homo sapiens (Human)	1065
Q6UXM1	LRIG3_HUMAN	reviewed	Leucine-rich repeats and immunoglobulin-like domains protein 3 (LIG-3)	LRIG3 LIG3 UNQ287/PRO326/PRO335	Homo sapiens (Human)	1119
Q9HBW1	LRRC4_HUMAN	reviewed	Leucine-rich repeat-containing protein 4 (Brain tumor-associated protein BAG) (Nasopharyngeal carcinoma-associated gene 14 protein) (Netrin-G2 ligand) (NGL-2)	LRRC4 BAG NAG14 UNQ554/PRO1111	Homo sapiens (Human)	653
Q96NW7	LRRC7_HUMAN	reviewed	Leucine-rich repeat-containing protein 7 (Densin-180) (Densin) (Protein LAP1)	LRRC7 KIAA1365 LAP1	Homo sapiens (Human)	1537
Q86VH5	LRRT3_HUMAN	reviewed	Leucine-rich repeat transmembrane neuronal protein 3	LRRTM3 UNQ803/PRO1693	Homo sapiens (Human)	581
Q13449	LSAMP_HUMAN	reviewed	Limbic system-associated membrane protein (LSAMP) (IgLON family member 3)	LSAMP IGLON3 LAMP	Homo sapiens (Human)	338
Q17RY6	LY6K_HUMAN	reviewed	Lymphocyte antigen 6K (Ly-6K)	LY6K CO16	Homo sapiens (Human)	165
P16581	LYAM2_HUMAN	reviewed	E-selectin (CD62 antigen-like family member E) (Endothelial leukocyte adhesion molecule 1) (ELAM-1) (Leukocyte-endothelial cell adhesion molecule 2) (LECAM2) (CD antigen CD62E)	SELE ELAM1	Homo sapiens (Human)	610
Q8NHJ6	LIRB4_HUMAN	reviewed	Leukocyte immunoglobulin-like receptor subfamily B member 4 (CD85 antigen-like family member K) (Immunoglobulin-like transcript 3) (ILT-3) (Leukocyte immunoglobulin-like receptor 5) (LIR-5) (Monocyte inhibitory receptor HM18) (CD antigen CD85k)	LILRB4 ILT3 LIR5	Homo sapiens (Human)	448
Q99677	LPAR4_HUMAN	reviewed	Lysophosphatidic acid receptor 4 (LPA receptor 4) (LPA-4) (G-protein coupled receptor 23) (P2Y purinoceptor 9) (P2Y9) (P2Y5-like receptor) (Purinergic receptor 9)	LPAR4 GPR23 LPA4 P2RY9	Homo sapiens (Human)	370
Q8IWT6	LRC8A_HUMAN	reviewed	Volume-regulated anion channel subunit LRRC8A (Leucine-rich repeat-containing protein 8A) (Swelling protein 1)	LRRC8A KIAA1437 LRRC8 SWELL1 UNQ221/PRO247	Homo sapiens (Human)	810
Q07954	LRP1_HUMAN	reviewed	Prolow-density lipoprotein receptor-related protein 1 (LRP-1) (Alpha-2-macroglobulin receptor) (A2MR) (Apolipoprotein E receptor) (APOER) (CD antigen CD91) [Cleaved into: Low-density lipoprotein receptor-related protein 1 85 kDa subunit (LRP-85); Low-density lipoprotein receptor-related protein 1 515 kDa subunit (LRP-515); Low-density lipoprotein receptor-related protein 1 intracellular domain (L…	LRP1 A2MR APR	Homo sapiens (Human)	4544
Q14114	LRP8_HUMAN	reviewed	Low-density lipoprotein receptor-related protein 8 (LRP-8) (Apolipoprotein E receptor 2)	LRP8 APOER2	Homo sapiens (Human)	963
O43300	LRRT2_HUMAN	reviewed	Leucine-rich repeat transmembrane neuronal protein 2 (Leucine-rich repeat neuronal 2 protein)	LRRTM2 KIAA0416 LRRN2	Homo sapiens (Human)	516
P33241	LSP1_HUMAN	reviewed	Lymphocyte-specific protein 1 (47 kDa actin-binding protein) (52 kDa phosphoprotein) (pp52) (Lymphocyte-specific antigen WP34)	LSP1 WP34	Homo sapiens (Human)	339
Q6UXB3	LYPD2_HUMAN	reviewed	Ly6/PLAUR domain-containing protein 2	LYPD2 LYPDC2 UNQ430/PRO788	Homo sapiens (Human)	125
Q6UX82	LYPD8_HUMAN	reviewed	Ly6/PLAUR domain-containing protein 8	LYPD8 UNQ511/PRO1026	Homo sapiens (Human)	237
Q12851	M4K2_HUMAN	reviewed	Mitogen-activated protein kinase kinase kinase kinase 2 (EC 2.7.11.1) (B lymphocyte serine/threonine-protein kinase) (Germinal center kinase) (GC kinase) (MAPK/ERK kinase kinase kinase 2) (MEK kinase kinase 2) (MEKKK 2) (Rab8-interacting protein)	MAP4K2 GCK RAB8IP	Homo sapiens (Human)	820
Q6UX01	LMBRL_HUMAN	reviewed	Protein LMBR1L (Limb region 1 protein homolog-like) (Lipocalin-1-interacting membrane receptor) (Lipocalin-interacting membrane receptor)	LMBR1L KIAA1174 LIMR UNQ458/PRO783	Homo sapiens (Human)	489
P16050	LOX15_HUMAN	reviewed	Arachidonate 15-lipoxygenase (15-LOX) (15-LOX-1) (EC 1.13.11.33) (12/15-lipoxygenase) (Arachidonate 12-lipoxygenase, leukocyte-type) (12-LOX) (EC 1.13.11.31) (Arachidonate omega-6 lipoxygenase)	ALOX15 LOG15	Homo sapiens (Human)	662
Q8NI32	LPD6B_HUMAN	reviewed	Ly6/PLAUR domain-containing protein 6B	LYPD6B	Homo sapiens (Human)	183
Q93052	LPP_HUMAN	reviewed	Lipoma-preferred partner (LIM domain-containing preferred translocation partner in lipoma)	LPP	Homo sapiens (Human)	612
O60711	LPXN_HUMAN	reviewed	Leupaxin	LPXN LDLP	Homo sapiens (Human)	386
P07948	LYN_HUMAN	reviewed	Tyrosine-protein kinase Lyn (EC 2.7.10.2) (Lck/Yes-related novel protein tyrosine kinase) (V-yes-1 Yamaguchi sarcoma viral related oncogene homolog) (p53Lyn) (p56Lyn)	LYN JTK8	Homo sapiens (Human)	512
Q96QZ7	MAGI1_HUMAN	reviewed	Membrane-associated guanylate kinase, WW and PDZ domain-containing protein 1 (Atrophin-1-interacting protein 3) (AIP-3) (BAI1-associated protein 1) (BAP-1) (Membrane-associated guanylate kinase inverted 1) (MAGI-1) (Trinucleotide repeat-containing gene 19 protein) (WW domain-containing protein 3) (WWP3)	MAGI1 AIP3 BAIAP1 BAP1 TNRC19	Homo sapiens (Human)	1491
Q86UL8	MAGI2_HUMAN	reviewed	Membrane-associated guanylate kinase, WW and PDZ domain-containing protein 2 (Atrophin-1-interacting protein 1) (AIP-1) (Atrophin-1-interacting protein A) (Membrane-associated guanylate kinase inverted 2) (MAGI-2)	MAGI2 ACVRINP1 AIP1 KIAA0705	Homo sapiens (Human)	1455
Q5TCQ9	MAGI3_HUMAN	reviewed	Membrane-associated guanylate kinase, WW and PDZ domain-containing protein 3 (Membrane-associated guanylate kinase inverted 3) (MAGI-3)	MAGI3 KIAA1634	Homo sapiens (Human)	1506
P04201	MAS_HUMAN	reviewed	Proto-oncogene Mas	MAS1 MAS	Homo sapiens (Human)	325
Q7L1W4	LRC8D_HUMAN	reviewed	Volume-regulated anion channel subunit LRRC8D (Leucine-rich repeat-containing protein 5) (Leucine-rich repeat-containing protein 8D)	LRRC8D LRRC5 UNQ213/PRO239	Homo sapiens (Human)	858
Q6IAA8	LTOR1_HUMAN	reviewed	Ragulator complex protein LAMTOR1 (Late endosomal/lysosomal adaptor and MAPK and MTOR activator 1) (Lipid raft adaptor protein p18) (Protein associated with DRMs and endosomes) (p27Kip1-releasing factor from RhoA) (p27RF-Rho)	LAMTOR1 C11orf59 PDRO PP7157	Homo sapiens (Human)	161
Q14210	LY6D_HUMAN	reviewed	Lymphocyte antigen 6D (Ly-6D) (E48 antigen)	LY6D E48	Homo sapiens (Human)	128
Q6UWN0	LYPD4_HUMAN	reviewed	Ly6/PLAUR domain-containing protein 4	LYPD4 UNQ2552/PRO6181	Homo sapiens (Human)	246
Q9Y250	LZTS1_HUMAN	reviewed	Leucine zipper putative tumor suppressor 1 (F37/esophageal cancer-related gene-coding leucine-zipper motif) (Fez1)	LZTS1 FEZ1	Homo sapiens (Human)	596
Q8N4S9	MALD2_HUMAN	reviewed	MARVEL domain-containing protein 2 (Tricellulin)	MARVELD2 TRIC	Homo sapiens (Human)	558
Q86YD5	LRAD3_HUMAN	reviewed	Low-density lipoprotein receptor class A domain-containing protein 3	LDLRAD3	Homo sapiens (Human)	345
Q6NSJ5	LRC8E_HUMAN	reviewed	Volume-regulated anion channel subunit LRRC8E (Leucine-rich repeat-containing protein 8E)	LRRC8E	Homo sapiens (Human)	796
Q86UE6	LRRT1_HUMAN	reviewed	Leucine-rich repeat transmembrane neuronal protein 1	LRRTM1 UNQ675/PRO1309	Homo sapiens (Human)	522
P22888	LSHR_HUMAN	reviewed	Lutropin-choriogonadotropic hormone receptor (LH/CG-R) (Luteinizing hormone receptor) (LHR) (LSH-R)	LHCGR LCGR LGR2 LHRHR	Homo sapiens (Human)	699
Q15722	LT4R1_HUMAN	reviewed	Leukotriene B4 receptor 1 (LTB4-R 1) (LTB4-R1) (Chemoattractant receptor-like 1) (G-protein coupled receptor 16) (P2Y purinoceptor 7) (P2Y7)	LTB4R BLT BLT1 BLTR CMKRL1 GPR16 P2RY7	Homo sapiens (Human)	352
Q6UWN5	LYPD5_HUMAN	reviewed	Ly6/PLAUR domain-containing protein 5	LYPD5 UNQ1908/PRO4356	Homo sapiens (Human)	251
O60299	LZTS3_HUMAN	reviewed	Leucine zipper putative tumor suppressor 3 (ProSAP-interacting protein 1) (ProSAPiP1)	LZTS3 KIAA0552 PROSAPIP1	Homo sapiens (Human)	673
O43318	M3K7_HUMAN	reviewed	Mitogen-activated protein kinase kinase kinase 7 (EC 2.7.11.25) (Transforming growth factor-beta-activated kinase 1) (TGF-beta-activated kinase 1)	MAP3K7 TAK1	Homo sapiens (Human)	606
Q969L2	MAL2_HUMAN	reviewed	Protein MAL2	MAL2	Homo sapiens (Human)	176
Q9BSK0	MALD1_HUMAN	reviewed	MARVEL domain-containing protein 1	MARVELD1 MRVLDC1	Homo sapiens (Human)	173
Q8TCQ1	MARH1_HUMAN	reviewed	E3 ubiquitin-protein ligase MARCH1 (EC 6.3.2.-) (Membrane-associated RING finger protein 1) (Membrane-associated RING-CH protein I) (MARCH-I) (RING finger protein 171)	MARCH1 RNF171	Homo sapiens (Human)	289
P27448	MARK3_HUMAN	reviewed	MAP/microtubule affinity-regulating kinase 3 (EC 2.7.11.1) (C-TAK1) (cTAK1) (Cdc25C-associated protein kinase 1) (ELKL motif kinase 2) (EMK-2) (Protein kinase STK10) (Ser/Thr protein kinase PAR-1) (Par-1a) (Serine/threonine-protein kinase p78)	MARK3 CTAK1 EMK2	Homo sapiens (Human)	753
P35410	MAS1L_HUMAN	reviewed	Mas-related G-protein coupled receptor MRG (MAS-R) (MAS1-like)	MAS1L MRG	Homo sapiens (Human)	378
Q6P0Q8	MAST2_HUMAN	reviewed	Microtubule-associated serine/threonine-protein kinase 2 (EC 2.7.11.1)	MAST2 KIAA0807 MAST205	Homo sapiens (Human)	1798
Q86VH4	LRRT4_HUMAN	reviewed	Leucine-rich repeat transmembrane neuronal protein 4	LRRTM4 UNQ3075/PRO9907	Homo sapiens (Human)	590
O95868	LY66D_HUMAN	reviewed	Lymphocyte antigen 6 complex locus protein G6d (Protein Ly6-D) (Megakaryocyte-enhanced gene transcript 1 protein)	LY6G6D C6orf23 G6D MEGT1 NG25	Homo sapiens (Human)	133
Q16553	LY6E_HUMAN	reviewed	Lymphocyte antigen 6E (Ly-6E) (Retinoic acid-induced gene E protein) (RIG-E) (Stem cell antigen 2) (SCA-2) (Thymic shared antigen 1) (TSA-1)	LY6E 9804 RIGE SCA2 TSA1	Homo sapiens (Human)	131
Q8N2G4	LYPD1_HUMAN	reviewed	Ly6/PLAUR domain-containing protein 1 (Putative HeLa tumor suppressor) (PHTS)	LYPD1 LYPDC1 PSEC0181 UNQ3079/PRO9917	Homo sapiens (Human)	141
Q9UPN3	MACF1_HUMAN	reviewed	Microtubule-actin cross-linking factor 1, isoforms 1/2/3/5 (620 kDa actin-binding protein) (ABP620) (Actin cross-linking family protein 7) (Macrophin-1) (Trabeculin-alpha)	MACF1 ABP620 ACF7 KIAA0465 KIAA1251	Homo sapiens (Human)	7388
Q9P0L2	MARK1_HUMAN	reviewed	Serine/threonine-protein kinase MARK1 (EC 2.7.11.1) (EC 2.7.11.26) (MAP/microtubule affinity-regulating kinase 1) (PAR1 homolog c) (Par-1c) (Par1c)	MARK1 KIAA1477 MARK	Homo sapiens (Human)	795
Q99705	MCHR1_HUMAN	reviewed	Melanin-concentrating hormone receptor 1 (MCH receptor 1) (MCH-R1) (MCHR-1) (G-protein coupled receptor 24) (MCH-1R) (MCH1R) (MCHR) (SLC-1) (Somatostatin receptor-like protein)	MCHR1 GPR24 SLC1	Homo sapiens (Human)	422
O15296	LX15B_HUMAN	reviewed	Arachidonate 15-lipoxygenase B (15-LOX-B) (EC 1.13.11.33) (15-lipoxygenase 2) (15-LOX-2) (Arachidonate 15-lipoxygenase type II) (Linoleate 13-lipoxygenase 15-LOb) (EC 1.13.11.-)	ALOX15B	Homo sapiens (Human)	676
Q5SQ64	LY66F_HUMAN	reviewed	Lymphocyte antigen 6 complex locus protein G6f	LY6G6F C6orf21 G6F LY6G6D NG32	Homo sapiens (Human)	297
Q9BZG9	LYNX1_HUMAN	reviewed	Ly-6/neurotoxin-like protein 1 (Secreted Ly-6/uPAR domain-containing protein 2) (Secreted Ly-6/uPAR-related protein 2) (SLURP-2)	LYNX1 SLURP2	Homo sapiens (Human)	131
Q7L5Y9	MAEA_HUMAN	reviewed	Macrophage erythroblast attacher (Cell proliferation-inducing gene 5 protein) (Erythroblast macrophage protein) (Human lung cancer oncogene 10 protein) (HLC-10)	MAEA EMP HLC10 PIG5	Homo sapiens (Human)	396
Q9H0U3	MAGT1_HUMAN	reviewed	Magnesium transporter protein 1 (MagT1) (Implantation-associated protein) (IAP)	MAGT1 IAG2 PSEC0084 UNQ628/PRO1244	Homo sapiens (Human)	335
Q14244	MAP7_HUMAN	reviewed	Ensconsin (Epithelial microtubule-associated protein of 115 kDa) (E-MAP-115) (Microtubule-associated protein 7) (MAP-7)	MAP7	Homo sapiens (Human)	749
Q7KZI7	MARK2_HUMAN	reviewed	Serine/threonine-protein kinase MARK2 (EC 2.7.11.1) (EC 2.7.11.26) (ELKL motif kinase 1) (EMK-1) (MAP/microtubule affinity-regulating kinase 2) (PAR1 homolog) (PAR1 homolog b) (Par-1b) (Par1b)	MARK2 EMK1	Homo sapiens (Human)	788
P32245	MC4R_HUMAN	reviewed	Melanocortin receptor 4 (MC4-R)	MC4R	Homo sapiens (Human)	332
P33032	MC5R_HUMAN	reviewed	Melanocortin receptor 5 (MC5-R) (MC-2)	MC5R	Homo sapiens (Human)	325
Q9GZU1	MCLN1_HUMAN	reviewed	Mucolipin-1 (MG-2) (Mucolipidin)	MCOLN1 ML4 MSTP080	Homo sapiens (Human)	580
Q14680	MELK_HUMAN	reviewed	Maternal embryonic leucine zipper kinase (hMELK) (EC 2.7.11.1) (Protein kinase Eg3) (pEg3 kinase) (Protein kinase PK38) (hPK38) (Tyrosine-protein kinase MELK) (EC 2.7.10.2)	MELK KIAA0175	Homo sapiens (Human)	651
Q9Y2H9	MAST1_HUMAN	reviewed	Microtubule-associated serine/threonine-protein kinase 1 (EC 2.7.11.1) (Syntrophin-associated serine/threonine-protein kinase)	MAST1 KIAA0973 SAST	Homo sapiens (Human)	1570
P08183	MDR1_HUMAN	reviewed	Multidrug resistance protein 1 (EC 3.6.3.44) (ATP-binding cassette sub-family B member 1) (P-glycoprotein 1) (CD antigen CD243)	ABCB1 MDR1 PGY1	Homo sapiens (Human)	1280
Q16820	MEP1B_HUMAN	reviewed	Meprin A subunit beta (EC 3.4.24.63) (Endopeptidase-2) (Meprin B) (N-benzoyl-L-tyrosyl-P-amino-benzoic acid hydrolase subunit beta) (PABA peptide hydrolase) (PPH beta)	MEP1B	Homo sapiens (Human)	701
P35240	MERL_HUMAN	reviewed	Merlin (Moesin-ezrin-radixin-like protein) (Neurofibromin-2) (Schwannomerlin) (Schwannomin)	NF2 SCH	Homo sapiens (Human)	595
Q9Y5V3	MAGD1_HUMAN	reviewed	Melanoma-associated antigen D1 (MAGE tumor antigen CCF) (MAGE-D1 antigen) (Neurotrophin receptor-interacting MAGE homolog)	MAGED1 NRAGE PP2250 PRO2292	Homo sapiens (Human)	778
Q9HCI5	MAGE1_HUMAN	reviewed	Melanoma-associated antigen E1 (Alpha-dystrobrevin-associated MAGE Protein) (DAMAGE) (Hepatocellular carcinoma-associated protein 1) (MAGE-E1 antigen)	MAGEE1 HCA1 KIAA1587	Homo sapiens (Human)	957
P41968	MC3R_HUMAN	reviewed	Melanocortin receptor 3 (MC3-R)	MC3R	Homo sapiens (Human)	323
Q7Z553	MDGA2_HUMAN	reviewed	MAM domain-containing glycosylphosphatidylinositol anchor protein 2 (MAM domain-containing protein 1)	MDGA2 MAMDC1 UNQ8188/PRO23197	Homo sapiens (Human)	956
O60291	MGRN1_HUMAN	reviewed	E3 ubiquitin-protein ligase MGRN1 (EC 6.3.2.-) (Mahogunin RING finger protein 1) (RING finger protein 156)	MGRN1 KIAA0544 RNF156	Homo sapiens (Human)	552
P02686	MBP_HUMAN	reviewed	Myelin basic protein (MBP) (Myelin A1 protein) (Myelin membrane encephalitogenic protein)	MBP	Homo sapiens (Human)	304
Q969V1	MCHR2_HUMAN	reviewed	Melanin-concentrating hormone receptor 2 (MCH receptor 2) (MCH-R2) (MCHR-2) (G-protein coupled receptor 145) (GPRv17) (MCH-2R) (MCH2) (MCH2R)	MCHR2 GPR145 SLT	Homo sapiens (Human)	340
Q8NFP4	MDGA1_HUMAN	reviewed	MAM domain-containing glycosylphosphatidylinositol anchor protein 1 (GPI and MAM protein) (GPIM) (Glycosylphosphatidylinositol-MAM) (MAM domain-containing protein 3)	MDGA1 MAMDC3	Homo sapiens (Human)	955
O43451	MGA_HUMAN	reviewed	Maltase-glucoamylase, intestinal [Includes: Maltase (EC 3.2.1.20) (Alpha-glucosidase); Glucoamylase (EC 3.2.1.3) (Glucan 1,4-alpha-glucosidase)]	MGAM MGA MGAML	Homo sapiens (Human)	1857
O15068	MCF2L_HUMAN	reviewed	Guanine nucleotide exchange factor DBS (DBL's big sister) (MCF2-transforming sequence-like protein)	MCF2L KIAA0362 OST	Homo sapiens (Human)	1137
Q14D04	MELT_HUMAN	reviewed	Ventricular zone-expressed PH domain-containing protein homolog 1 (Protein melted)	VEPH1 KIAA1692 VEPH	Homo sapiens (Human)	833
P55082	MFAP3_HUMAN	reviewed	Microfibril-associated glycoprotein 3	MFAP3	Homo sapiens (Human)	362
Q8IY33	MILK2_HUMAN	reviewed	MICAL-like protein 2 (Junctional Rab13-binding protein) (Molecule interacting with CasL-like 2) (MICAL-L2)	MICALL2 JRAB	Homo sapiens (Human)	904
Q96KG7	MEG10_HUMAN	reviewed	Multiple epidermal growth factor-like domains protein 10 (Multiple EGF-like domains protein 10)	MEGF10 KIAA1780	Homo sapiens (Human)	1140
A6BM72	MEG11_HUMAN	reviewed	Multiple epidermal growth factor-like domains protein 11 (Multiple EGF-like domains protein 11)	MEGF11 KIAA1781 UNQ1949/PRO4432	Homo sapiens (Human)	1044
Q5HYA8	MKS3_HUMAN	reviewed	Meckelin (Meckel syndrome type 3 protein) (Transmembrane protein 67)	TMEM67 MKS3	Homo sapiens (Human)	995
P51512	MMP16_HUMAN	reviewed	Matrix metalloproteinase-16 (MMP-16) (EC 3.4.24.-) (MMP-X2) (Membrane-type matrix metalloproteinase 3) (MT-MMP 3) (MTMMP3) (Membrane-type-3 matrix metalloproteinase) (MT3-MMP) (MT3MMP)	MMP16 MMPX2	Homo sapiens (Human)	607
P21439	MDR3_HUMAN	reviewed	Phosphatidylcholine translocator ABCB4 (ATP-binding cassette sub-family B member 4) (Multidrug resistance protein 3) (EC 3.6.3.44) (P-glycoprotein 3)	ABCB4 MDR3 PGY3	Homo sapiens (Human)	1286
Q8N4C8	MINK1_HUMAN	reviewed	Misshapen-like kinase 1 (EC 2.7.11.1) (GCK family kinase MiNK) (MAPK/ERK kinase kinase kinase 6) (MEK kinase kinase 6) (MEKKK 6) (Misshapen/NIK-related kinase) (Mitogen-activated protein kinase kinase kinase kinase 6)	MINK1 B55 MAP4K6 MINK YSK2 ZC3	Homo sapiens (Human)	1332
O75121	MFA3L_HUMAN	reviewed	Microfi brillar-associated protein 3-like (Testis development protein NYD-SP9)	MFAP3L KIAA0626 HSD-39 HSD39	Homo sapiens (Human)	409
Q9BY79	MFRP_HUMAN	reviewed	Membrane frizzled-related protein (Membrane-type frizzled-related protein)	MFRP	Homo sapiens (Human)	579
Q6N075	MFSD5_HUMAN	reviewed	Molybdate-anion transporter (Major facilitator superfamily domain-containing protein 5) (Molybdate transporter 2 homolog) (hsMOT2)	MFSD5 UNQ832/PRO1759	Homo sapiens (Human)	450
Q9BRT3	MIEN1_HUMAN	reviewed	Migration and invasion enhancer 1 (HBV X-transactivated gene 4 protein) (HBV XAg-transactivated protein 4) (Protein C35)	MIEN1 C17orf37 RDX12 XTP4	Homo sapiens (Human)	115
Q29983	MICA_HUMAN	reviewed	MHC class I polypeptide-related sequence A (MIC-A)	MICA PERB11.1	Homo sapiens (Human)	383
Q15049	MLC1_HUMAN	reviewed	Membrane protein MLC1	MLC1 KIAA0027 WKL1	Homo sapiens (Human)	377
Q8TD46	MO2R1_HUMAN	reviewed	Cell surface glycoprotein CD200 receptor 1 (CD200 cell surface glycoprotein receptor) (Cell surface glycoprotein OX2 receptor 1)	CD200R1 CD200R CRTR2 MOX2R OX2R UNQ2522/PRO6015	Homo sapiens (Human)	325
O15374	MOT5_HUMAN	reviewed	Monocarboxylate transporter 5 (MCT 5) (Monocarboxylate transporter 4) (MCT 4) (Solute carrier family 16 member 4)	SLC16A4 MCT4 MCT5	Homo sapiens (Human)	487
P36021	MOT8_HUMAN	reviewed	Monocarboxylate transporter 8 (MCT 8) (Monocarboxylate transporter 7) (MCT 7) (Solute carrier family 16 member 2) (X-linked PEST-containing transporter)	SLC16A2 MCT8 XPCT	Homo sapiens (Human)	539
Q5TF39	MFS4B_HUMAN	reviewed	Sodium-dependent glucose transporter 1 (Major facilitator superfamily domain-containing protein 4B)	MFSD4B KIAA1919 NAGLT1 HSPC100	Homo sapiens (Human)	518
Q29980	MICB_HUMAN	reviewed	MHC class I polypeptide-related sequence B (MIC-B)	MICB PERB11.2	Homo sapiens (Human)	383
P30301	MIP_HUMAN	reviewed	Lens fiber major intrinsic protein (Aquaporin-0) (MIP26) (MP26)	MIP AQP0	Homo sapiens (Human)	263
Q9ULZ9	MMP17_HUMAN	reviewed	Matrix metalloproteinase-17 (MMP-17) (EC 3.4.24.-) (Membrane-type matrix metalloproteinase 4) (MT-MMP 4) (MTMMP4) (Membrane-type-4 matrix metalloproteinase) (MT4-MMP) (MT4MMP)	MMP17 MT4MMP	Homo sapiens (Human)	603
Q9NPA2	MMP25_HUMAN	reviewed	Matrix metalloproteinase-25 (MMP-25) (EC 3.4.24.-) (Leukolysin) (Membrane-type matrix metalloproteinase 6) (MT-MMP 6) (MTMMP6) (Membrane-type-6 matrix metalloproteinase) (MT6-MMP) (MT6MMP)	MMP25 MMP20 MMPL1 MT6MMP	Homo sapiens (Human)	562
Q8N3R9	MPP5_HUMAN	reviewed	MAGUK p55 subfamily member 5	MPP5	Homo sapiens (Human)	675
Q86YT6	MIB1_HUMAN	reviewed	E3 ubiquitin-protein ligase MIB1 (EC 6.3.2.-) (DAPK-interacting protein 1) (DIP-1) (Mind bomb homolog 1) (Zinc finger ZZ type with ankyrin repeat domain protein 2)	MIB1 DIP1 KIAA1323 ZZANK2	Homo sapiens (Human)	1006
Q7Z6M3	MILR1_HUMAN	reviewed	Allergin-1 (Allergy inhibitory receptor 1) (Mast cell antigen 32) (MCA-32) (Mast cell immunoglobulin-like receptor 1)	MILR1 C17orf60 MCA32	Homo sapiens (Human)	343
Q7RTY0	MOT13_HUMAN	reviewed	Monocarboxylate transporter 13 (MCT 13) (Solute carrier family 16 member 13)	SLC16A13 MCT13	Homo sapiens (Human)	426
Q86WK9	MPRA_HUMAN	reviewed	Membrane progestin receptor alpha (mPR alpha) (Progestin and adipoQ receptor family member 7) (Progestin and adipoQ receptor family member VII)	PAQR7 MRPA	Homo sapiens (Human)	346
Q8TCY5	MRAP_HUMAN	reviewed	Melanocortin-2 receptor accessory protein (B27) (Fat cell-specific low molecular weight protein) (Fat tissue-specific low MW protein)	MRAP C21orf61 FALP	Homo sapiens (Human)	172
Q86SM5	MRGRG_HUMAN	reviewed	Mas-related G-protein coupled receptor member G (G-protein coupled receptor 169)	MRGPRG GPR169 MRGG	Homo sapiens (Human)	289
Q96LB0	MRGX3_HUMAN	reviewed	Mas-related G-protein coupled receptor member X3 (Sensory neuron-specific G-protein coupled receptor 1/2)	MRGPRX3 MRGX3 SNSR1 SNSR2	Homo sapiens (Human)	322
O95255	MRP6_HUMAN	reviewed	Multidrug resistance-associated protein 6 (ATP-binding cassette sub-family C member 6) (Anthracycline resistance-associated protein) (Multi-specific organic anion transporter E) (MOAT-E)	ABCC6 ARA MRP6	Homo sapiens (Human)	1503
Q9Y5R2	MMP24_HUMAN	reviewed	Matrix metalloproteinase-24 (MMP-24) (EC 3.4.24.-) (Membrane-type matrix metalloproteinase 5) (MT-MMP 5) (MTMMP5) (Membrane-type-5 matrix metalloproteinase) (MT5-MMP) (MT5MMP) [Cleaved into: Processed matrix metalloproteinase-24]	MMP24 MT5MMP	Homo sapiens (Human)	645
Q16653	MOG_HUMAN	reviewed	Myelin-oligodendrocyte glycoprotein	MOG	Homo sapiens (Human)	247
Q8TF71	MOT10_HUMAN	reviewed	Monocarboxylate transporter 10 (MCT 10) (Aromatic amino acid transporter 1) (Solute carrier family 16 member 10) (T-type amino acid transporter 1)	SLC16A10 MCT10 TAT1	Homo sapiens (Human)	515
P53985	MOT1_HUMAN	reviewed	Monocarboxylate transporter 1 (MCT 1) (Solute carrier family 16 member 1)	SLC16A1 MCT1	Homo sapiens (Human)	500
O60669	MOT2_HUMAN	reviewed	Monocarboxylate transporter 2 (MCT 2) (Solute carrier family 16 member 7)	SLC16A7 MCT2	Homo sapiens (Human)	478
O15403	MOT7_HUMAN	reviewed	Monocarboxylate transporter 7 (MCT 7) (Monocarboxylate transporter 6) (MCT 6) (Solute carrier family 16 member 6)	SLC16A6 MCT6 MCT7	Homo sapiens (Human)	523
Q8N565	MREG_HUMAN	reviewed	Melanoregulin (Dilute suppressor protein homolog)	MREG DSU HDCGA21P	Homo sapiens (Human)	214
Q13421	MSLN_HUMAN	reviewed	Mesothelin (CAK1 antigen) (Pre-pro-megakaryocyte-potentiating factor) [Cleaved into: Megakaryocyte-potentiating factor (MPF); Mesothelin, cleaved form]	MSLN MPF	Homo sapiens (Human)	630
Q8NB16	MLKL_HUMAN	reviewed	Mixed lineage kinase domain-like protein (hMLKL)	MLKL	Homo sapiens (Human)	471
O95907	MOT3_HUMAN	reviewed	Monocarboxylate transporter 3 (MCT 3) (Solute carrier family 16 member 8)	SLC16A8 MCT3	Homo sapiens (Human)	504
O15427	MOT4_HUMAN	reviewed	Monocarboxylate transporter 4 (MCT 4) (Solute carrier family 16 member 3)	SLC16A3 MCT4	Homo sapiens (Human)	465
Q86SM8	MRGRE_HUMAN	reviewed	Mas-related G-protein coupled receptor member E (G-protein coupled receptor 167)	MRGPRE GPR167 MRGE	Homo sapiens (Human)	312
Q96AM1	MRGRF_HUMAN	reviewed	Mas-related G-protein coupled receptor member F (Mas-related gene F protein) (G-protein coupled receptor 140) (G-protein coupled receptor 168)	MRGPRF GPR140 GPR168 MRGF PSEC0142	Homo sapiens (Human)	343
Q96LB2	MRGX1_HUMAN	reviewed	Mas-related G-protein coupled receptor member X1 (Sensory neuron-specific G-protein coupled receptor 3/4)	MRGPRX1 MRGX1 SNSR3 SNSR4	Homo sapiens (Human)	322
P49006	MRP_HUMAN	reviewed	MARCKS-related protein (MARCKS-like protein 1) (Macrophage myristoylated alanine-rich C kinase substrate) (Mac-MARCKS) (MacMARCKS)	MARCKSL1 MLP MRP	Homo sapiens (Human)	195
Q8NCK7	MOT11_HUMAN	reviewed	Monocarboxylate transporter 11 (MCT 11) (Solute carrier family 16 member 11)	SLC16A11 MCT11	Homo sapiens (Human)	471
Q6ZSM3	MOT12_HUMAN	reviewed	Monocarboxylate transporter 12 (MCT 12) (Creatine transporter 2) (CRT2) (Solute carrier family 16 member 12)	SLC16A12 MCT12	Homo sapiens (Human)	486
Q7RTX9	MOT14_HUMAN	reviewed	Monocarboxylate transporter 14 (MCT 14) (Solute carrier family 16 member 14)	SLC16A14 MCT14	Homo sapiens (Human)	510
O15375	MOT6_HUMAN	reviewed	Monocarboxylate transporter 6 (MCT 6) (Monocarboxylate transporter 5) (MCT 5) (Solute carrier family 16 member 5)	SLC16A5 MCT5 MCT6	Homo sapiens (Human)	505
Q7RTY1	MOT9_HUMAN	reviewed	Monocarboxylate transporter 9 (MCT 9) (Solute carrier family 16 member 9)	SLC16A9 C10orf36 MCT9	Homo sapiens (Human)	509
Q8TEZ7	MPRB_HUMAN	reviewed	Membrane progestin receptor beta (mPR beta) (Lysosomal membrane protein in brain 1) (Progestin and adipoQ receptor family member 8) (Progestin and adipoQ receptor family member VIII)	PAQR8 C6orf33 LMPB1 MPRB	Homo sapiens (Human)	354
Q96G30	MRAP2_HUMAN	reviewed	Melanocortin-2 receptor accessory protein 2 (MC2R accessory protein 2)	MRAP2 C6orf117	Homo sapiens (Human)	205
Q9Y5S2	MRCKB_HUMAN	reviewed	Serine/threonine-protein kinase MRCK beta (EC 2.7.11.1) (CDC42-binding protein kinase beta) (CDC42BP-beta) (DMPK-like beta) (Myotonic dystrophy kinase-related CDC42-binding kinase beta) (MRCK beta) (Myotonic dystrophy protein kinase-like beta)	CDC42BPB KIAA1124	Homo sapiens (Human)	1711
Q96LB1	MRGX2_HUMAN	reviewed	Mas-related G-protein coupled receptor member X2	MRGPRX2 MRGX2	Homo sapiens (Human)	330
P33527	MRP1_HUMAN	reviewed	Multidrug resistance-associated protein 1 (ATP-binding cassette sub-family C member 1) (Leukotriene C(4) transporter) (LTC4 transporter)	ABCC1 MRP MRP1	Homo sapiens (Human)	1531
Q13613	MTMR1_HUMAN	reviewed	Myotubularin-related protein 1 (Phosphatidylinositol-3-phosphate phosphatase) (EC 3.1.3.64)	MTMR1	Homo sapiens (Human)	665
Q13585	MTR1L_HUMAN	reviewed	Melatonin-related receptor (G protein-coupled receptor 50) (H9)	GPR50	Homo sapiens (Human)	617
O75970	MPDZ_HUMAN	reviewed	Multiple PDZ domain protein (Multi-PDZ domain protein 1)	MPDZ MUPP1	Homo sapiens (Human)	2070
Q8TDS7	MRGRD_HUMAN	reviewed	Mas-related G-protein coupled receptor member D (Beta-alanine receptor) (G-protein coupled receptor TGR7)	MRGPRD MRGD	Homo sapiens (Human)	321
P15941	MUC1_HUMAN	reviewed	Mucin-1 (MUC-1) (Breast carcinoma-associated antigen DF3) (Cancer antigen 15-3) (CA 15-3) (Carcinoma-associated mucin) (Episialin) (H23AG) (Krebs von den Lungen-6) (KL-6) (PEMT) (Peanut-reactive urinary mucin) (PUM) (Polymorphic epithelial mucin) (PEM) (Tumor-associated epithelial membrane antigen) (EMA) (Tumor-associated mucin) (CD antigen CD227) [Cleaved into: Mucin-1 subunit alpha (MUC1-NT) (M…	MUC1 PUM	Homo sapiens (Human)	1255
P26038	MOES_HUMAN	reviewed	Moesin (Membrane-organizing extension spike protein)	MSN	Homo sapiens (Human)	577
P48039	MTR1A_HUMAN	reviewed	Melatonin receptor type 1A (Mel-1A-R) (Mel1a receptor)	MTNR1A	Homo sapiens (Human)	350
Q8N307	MUC20_HUMAN	reviewed	Mucin-20 (MUC-20)	MUC20 KIAA1359 UNQ2782/PRO7170	Homo sapiens (Human)	709
P22897	MRC1_HUMAN	reviewed	Macrophage mannose receptor 1 (MMR) (C-type lectin domain family 13 member D) (C-type lectin domain family 13 member D-like) (Human mannose receptor) (hMR) (Macrophage mannose receptor 1-like protein 1) (CD antigen CD206)	MRC1 CLEC13D CLEC13DL MRC1L1	Homo sapiens (Human)	1456
Q5T3U5	MRP7_HUMAN	reviewed	Multidrug resistance-associated protein 7 (ATP-binding cassette sub-family C member 10)	ABCC10 MRP7 SIMRP7	Homo sapiens (Human)	1492
Q8N387	MUC15_HUMAN	reviewed	Mucin-15 (MUC-15)	MUC15 UNQ750/PRO1481	Homo sapiens (Human)	334
Q8WXI7	MUC16_HUMAN	reviewed	Mucin-16 (MUC-16) (Ovarian cancer-related tumor marker CA125) (CA-125) (Ovarian carcinoma antigen CA125)	MUC16 CA125	Homo sapiens (Human)	14507
Q96LA9	MRGX4_HUMAN	reviewed	Mas-related G-protein coupled receptor member X4 (Sensory neuron-specific G-protein coupled receptor 5/6)	MRGPRX4 MRGX4 SNSR5 SNSR6	Homo sapiens (Human)	322
Q92887	MRP2_HUMAN	reviewed	Canalicular multispecific organic anion transporter 1 (ATP-binding cassette sub-family C member 2) (Canalicular multidrug resistance protein) (Multidrug resistance-associated protein 2)	ABCC2 CMOAT CMOAT1 CMRP MRP2	Homo sapiens (Human)	1545
Q01726	MSHR_HUMAN	reviewed	Melanocyte-stimulating hormone receptor (MSH-R) (Melanocortin receptor 1) (MC1-R)	MC1R MSHR	Homo sapiens (Human)	317
Q9Y4B5	MTCL1_HUMAN	reviewed	Microtubule cross-linking factor 1 (Coiled-coil domain-containing protein 165) (PAR-1-interacting protein) (SOGA family member 2)	MTCL1 CCDC165 KIAA0802 SOGA2	Homo sapiens (Human)	1905
O43193	MTLR_HUMAN	reviewed	Motilin receptor (G-protein coupled receptor 38)	MLNR GPR38 MTLR MTLR1	Homo sapiens (Human)	412
Q685J3	MUC17_HUMAN	reviewed	Mucin-17 (MUC-17) (Small intestinal mucin-3) (MUC-3)	MUC17 MUC3	Homo sapiens (Human)	4493
Q5SSG8	MUC21_HUMAN	reviewed	Mucin-21 (MUC-21) (Epiglycanin)	MUC21 C6orf205 UNQ697/PRO1342	Homo sapiens (Human)	566
Q99102	MUC4_HUMAN	reviewed	Mucin-4 (MUC-4) (Ascites sialoglycoprotein) (ASGP) (Pancreatic adenocarcinoma mucin) (Testis mucin) (Tracheobronchial mucin) [Cleaved into: Mucin-4 alpha chain (Ascites sialoglycoprotein 1) (ASGP-1); Mucin-4 beta chain (Ascites sialoglycoprotein 2) (ASGP-2)]	MUC4	Homo sapiens (Human)	2169
Q13496	MTM1_HUMAN	reviewed	Myotubularin (Phosphatidylinositol-3,5-bisphosphate 3-phosphatase) (EC 3.1.3.95) (Phosphatidylinositol-3-phosphate phosphatase) (EC 3.1.3.64)	MTM1 CG2	Homo sapiens (Human)	603
Q9ULD2	MTUS1_HUMAN	reviewed	Microtubule-associated tumor suppressor 1 (AT2 receptor-binding protein) (Angiotensin-II type 2 receptor-interacting protein) (Mitochondrial tumor suppressor 1)	MTUS1 ATBP ATIP GK1 KIAA1288 MTSG1	Homo sapiens (Human)	1270
Q9H3R2	MUC13_HUMAN	reviewed	Mucin-13 (MUC-13) (Down-regulated in colon cancer 1)	MUC13 DRCC1 RECC UNQ6194/PRO20221	Homo sapiens (Human)	512
O15146	MUSK_HUMAN	reviewed	Muscle, skeletal receptor tyrosine-protein kinase (EC 2.7.10.1) (Muscle-specific tyrosine-protein kinase receptor) (MuSK) (Muscle-specific kinase receptor)	MUSK	Homo sapiens (Human)	869
Q9HD67	MYO10_HUMAN	reviewed	Unconventional myosin-X (Unconventional myosin-10)	MYO10 KIAA0799	Homo sapiens (Human)	2058
Q9NZM1	MYOF_HUMAN	reviewed	Myoferlin (Fer-1-like protein 3)	MYOF FER1L3 KIAA1207	Homo sapiens (Human)	2061
P49286	MTR1B_HUMAN	reviewed	Melatonin receptor type 1B (Mel-1B-R) (Mel1b receptor)	MTNR1B	Homo sapiens (Human)	362
Q9ULC0	MUCEN_HUMAN	reviewed	Endomucin (Endomucin-2) (Gastric cancer antigen Ga34) (Mucin-14) (MUC-14)	EMCN EMCN2 MUC14	Homo sapiens (Human)	261
Q9UPR5	NAC2_HUMAN	reviewed	Sodium/calcium exchanger 2 (Na(+)/Ca(2+)-exchange protein 2) (Solute carrier family 8 member 2)	SLC8A2 KIAA1087 NCX2	Homo sapiens (Human)	921
P57103	NAC3_HUMAN	reviewed	Sodium/calcium exchanger 3 (Na(+)/Ca(2+)-exchange protein 3) (Solute carrier family 8 member 3)	SLC8A3 NCX3	Homo sapiens (Human)	927
Q9BV57	MTND_HUMAN	reviewed	1,2-dihydroxy-3-keto-5-methylthiopentene dioxygenase (EC 1.13.11.54) (Acireductone dioxygenase (Fe(2+)-requiring)) (ARD) (Fe-ARD) (Membrane-type 1 matrix metalloproteinase cytoplasmic tail-binding protein 1) (MTCBP-1) (Submergence-induced protein-like factor) (Sip-L)	ADI1 MTCBP1 HMFT1638	Homo sapiens (Human)	179
Q04900	MUC24_HUMAN	reviewed	Sialomucin core protein 24 (MUC-24) (Endolyn) (Multi-glycosylated core protein 24) (MGC-24) (MGC-24v) (CD antigen CD164)	CD164	Homo sapiens (Human)	197
P0CAP1	MYZAP_HUMAN	reviewed	Myocardial zonula adherens protein (GRINL1A upstream protein) (Gup)	MYZAP MYOZAP	Homo sapiens (Human)	466
Q8WY64	MYLIP_HUMAN	reviewed	E3 ubiquitin-protein ligase MYLIP (EC 6.3.2.-) (Inducible degrader of the LDL-receptor) (Idol) (Myosin regulatory light chain interacting protein) (MIR)	MYLIP BZF1 IDOL BM-023 PP5242	Homo sapiens (Human)	445
P60201	MYPR_HUMAN	reviewed	Myelin proteolipid protein (PLP) (Lipophilin)	PLP1 PLP	Homo sapiens (Human)	277
Q9BZM6	N2DL1_HUMAN	reviewed	NKG2D ligand 1 (N2DL-1) (NKG2DL1) (ALCAN-beta) (Retinoic acid early transcript 1I) (UL16-binding protein 1)	ULBP1 N2DL1 RAET1I	Homo sapiens (Human)	244
P32418	NAC1_HUMAN	reviewed	Sodium/calcium exchanger 1 (Na(+)/Ca(2+)-exchange protein 1) (Solute carrier family 8 member 1)	SLC8A1 CNC NCX1	Homo sapiens (Human)	973
P25189	MYP0_HUMAN	reviewed	Myelin protein P0 (Myelin peripheral protein) (MPP) (Myelin protein zero)	MPZ	Homo sapiens (Human)	248
Q13508	NAR3_HUMAN	reviewed	Ecto-ADP-ribosyltransferase 3 (EC 2.4.2.31) (ADP-ribosyltransferase C2 and C3 toxin-like 3) (ARTC3) (Mono(ADP-ribosyl)transferase 3) (NAD(P)(+)--arginine ADP-ribosyltransferase 3)	ART3 TMART	Homo sapiens (Human)	389
Q9BZM5	N2DL2_HUMAN	reviewed	NKG2D ligand 2 (N2DL-2) (NKG2DL2) (ALCAN-alpha) (Retinoic acid early transcript 1H) (UL16-binding protein 2)	ULBP2 N2DL2 RAET1H UNQ463/PRO791	Homo sapiens (Human)	246
Q9Y3Q0	NALD2_HUMAN	reviewed	N-acetylated-alpha-linked acidic dipeptidase 2 (EC 3.4.17.21) (Glutamate carboxypeptidase III) (GCPIII) (N-acetylated-alpha-linked acidic dipeptidase II) (NAALADase II)	NAALAD2	Homo sapiens (Human)	740
O15394	NCAM2_HUMAN	reviewed	Neural cell adhesion molecule 2 (N-CAM-2) (NCAM-2)	NCAM2 NCAM21	Homo sapiens (Human)	837
O76036	NCTR1_HUMAN	reviewed	Natural cytotoxicity triggering receptor 1 (Lymphocyte antigen 94 homolog) (NK cell-activating receptor) (Natural killer cell p46-related protein) (NK-p46) (NKp46) (hNKp46) (CD antigen CD335)	NCR1 LY94	Homo sapiens (Human)	304
O00159	MYO1C_HUMAN	reviewed	Unconventional myosin-Ic (Myosin I beta) (MMI-beta) (MMIb)	MYO1C	Homo sapiens (Human)	1063
B0I1T2	MYO1G_HUMAN	reviewed	Unconventional myosin-Ig [Cleaved into: Minor histocompatibility antigen HA-2 (mHag HA-2)]	MYO1G HA2	Homo sapiens (Human)	1018
Q9UBF9	MYOTI_HUMAN	reviewed	Myotilin (57 kDa cytoskeletal protein) (Myofibrillar titin-like Ig domains protein) (Titin immunoglobulin domain protein)	MYOT TTID	Homo sapiens (Human)	498
Q9BZM4	N2DL3_HUMAN	reviewed	NKG2D ligand 3 (N2DL-3) (NKG2DL3) (ALCAN-gamma) (Retinoic acid early transcript 1N)	ULBP3 N2DL3 RAET1N	Homo sapiens (Human)	244
Q9UQQ1	NALDL_HUMAN	reviewed	N-acetylated-alpha-linked acidic dipeptidase-like protein (NAALADase L) (EC 3.4.17.21) (100 kDa ileum brush border membrane protein) (I100) (Ileal dipeptidylpeptidase)	NAALADL1 NAALADASEL NAALADL	Homo sapiens (Human)	740
Q93070	NAR4_HUMAN	reviewed	Ecto-ADP-ribosyltransferase 4 (EC 2.4.2.31) (ADP-ribosyltransferase C2 and C3 toxin-like 4) (ARTC4) (Dombrock blood group carrier molecule) (Mono(ADP-ribosyl)transferase 4) (NAD(P)(+)--arginine ADP-ribosyltransferase 4) (CD antigen CD297)	ART4 DO DOK1	Homo sapiens (Human)	314
Q96SB3	NEB2_HUMAN	reviewed	Neurabin-2 (Neurabin-II) (Protein phosphatase 1 regulatory subunit 9B) (Spinophilin)	PPP1R9B PPP1R6	Homo sapiens (Human)	815
P46934	NEDD4_HUMAN	reviewed	E3 ubiquitin-protein ligase NEDD4 (EC 6.3.2.-) (Cell proliferation-inducing gene 53 protein) (Neural precursor cell expressed developmentally down-regulated protein 4) (NEDD-4)	NEDD4 KIAA0093 NEDD4-1 PIG53	Homo sapiens (Human)	1319
Q7Z3B1	NEGR1_HUMAN	reviewed	Neuronal growth regulator 1 (IgLON family member 4)	NEGR1 IGLON4 UNQ2433/PRO4993	Homo sapiens (Human)	354
Q9UM54	MYO6_HUMAN	reviewed	Unconventional myosin-VI (Unconventional myosin-6)	MYO6 KIAA0389	Homo sapiens (Human)	1294
Q86W26	NAL10_HUMAN	reviewed	NACHT, LRR and PYD domains-containing protein 10 (Nucleotide-binding oligomerization domain protein 8)	NLRP10 NALP10 NOD8 PYNOD	Homo sapiens (Human)	655
O14931	NCTR3_HUMAN	reviewed	Natural cytotoxicity triggering receptor 3 (Activating natural killer receptor p30) (Natural killer cell p30-related protein) (NK-p30) (NKp30) (CD antigen CD337)	NCR3 1C7 LY117	Homo sapiens (Human)	201
Q9NQS3	NECT3_HUMAN	reviewed	Nectin-3 (CDw113) (Nectin cell adhesion molecule 3) (Poliovirus receptor-related protein 3) (CD antigen CD113)	NECTIN3 PRR3 PVRL3	Homo sapiens (Human)	549
Q8TDF5	NETO1_HUMAN	reviewed	Neuropilin and tolloid-like protein 1 (Brain-specific transmembrane protein containing 2 CUB and 1 LDL-receptor class A domains protein 1)	NETO1 BTCL1	Homo sapiens (Human)	533
Q99519	NEUR1_HUMAN	reviewed	Sialidase-1 (EC 3.2.1.18) (Acetylneuraminyl hydrolase) (G9 sialidase) (Lysosomal sialidase) (N-acetyl-alpha-neuraminidase 1)	NEU1 NANH	Homo sapiens (Human)	415
O14745	NHRF1_HUMAN	reviewed	Na(+)/H(+) exchange regulatory cofactor NHE-RF1 (NHERF-1) (Ezrin-radixin-moesin-binding phosphoprotein 50) (EBP50) (Regulatory cofactor of Na(+)/H(+) exchanger) (Sodium-hydrogen exchanger regulatory factor 1) (Solute carrier family 9 isoform A3 regulatory factor 1)	SLC9A3R1 NHERF NHERF1	Homo sapiens (Human)	358
Q86UT5	NHRF4_HUMAN	reviewed	Na(+)/H(+) exchange regulatory cofactor NHE-RF4 (NHERF-4) (Intestinal and kidney-enriched PDZ protein) (Natrium-phosphate cotransporter IIa C-terminal-associated protein 2) (Na/Pi cotransporter C-terminal-associated protein 2) (NaPi-Cap2) (PDZ domain-containing protein 2) (PDZ domain-containing protein 3) (Sodium-hydrogen exchanger regulatory factor 4)	PDZD3 IKEPP NHERF4 PDZK2 DLNB27	Homo sapiens (Human)	571
P13591	NCAM1_HUMAN	reviewed	Neural cell adhesion molecule 1 (N-CAM-1) (NCAM-1) (CD antigen CD56)	NCAM1 NCAM	Homo sapiens (Human)	858
Q9Y2A7	NCKP1_HUMAN	reviewed	Nck-associated protein 1 (NAP 1) (Membrane-associated protein HEM-2) (p125Nap1)	NCKAP1 HEM2 KIAA0587 NAP1	Homo sapiens (Human)	1128
Q5T1S8	NCMAP_HUMAN	reviewed	Noncompact myelin-associated protein (Myelin protein of 11 kDa) (MP11)	NCMAP C1orf130	Homo sapiens (Human)	102
O95944	NCTR2_HUMAN	reviewed	Natural cytotoxicity triggering receptor 2 (Lymphocyte antigen 95 homolog) (NK cell-activating receptor) (Natural killer cell p44-related protein) (NK-p44) (NKp44) (CD antigen CD336)	NCR2 LY95	Homo sapiens (Human)	276
Q8NC96	NECP1_HUMAN	reviewed	Adaptin ear-binding coat-associated protein 1 (NECAP endocytosis-associated protein 1) (NECAP-1)	NECAP1	Homo sapiens (Human)	275
Q15223	NECT1_HUMAN	reviewed	Nectin-1 (Herpes virus entry mediator C) (Herpesvirus entry mediator C) (HveC) (Herpesvirus Ig-like receptor) (HIgR) (Nectin cell adhesion molecule 1) (Poliovirus receptor-related protein 1) (CD antigen CD111)	NECTIN1 HVEC PRR1 PVRL1	Homo sapiens (Human)	517
Q92859	NEO1_HUMAN	reviewed	Neogenin (Immunoglobulin superfamily DCC subclass member 2)	NEO1 IGDCC2 NGN	Homo sapiens (Human)	1461
Q9UQ49	NEUR3_HUMAN	reviewed	Sialidase-3 (EC 3.2.1.18) (Ganglioside sialidase) (Membrane sialidase) (N-acetyl-alpha-neuraminidase 3)	NEU3	Homo sapiens (Human)	428
Q9Y2I1	NISCH_HUMAN	reviewed	Nischarin (Imidazoline receptor 1) (I-1) (IR1) (Imidazoline receptor antisera-selected protein) (hIRAS) (Imidazoline-1 receptor) (I1R) (Imidazoline-1 receptor candidate protein) (I-1 receptor candidate protein) (I1R candidate protein)	NISCH IRAS KIAA0975	Homo sapiens (Human)	1504
P21452	NK2R_HUMAN	reviewed	Substance-K receptor (SKR) (NK-2 receptor) (NK-2R) (Neurokinin A receptor) (Tachykinin receptor 2)	TACR2 NK2R NKNAR TAC2R	Homo sapiens (Human)	398
P26718	NKG2D_HUMAN	reviewed	NKG2-D type II integral membrane protein (Killer cell lectin-like receptor subfamily K member 1) (NK cell receptor D) (NKG2-D-activating NK receptor) (CD antigen CD314)	KLRK1 D12S2489E NKG2D	Homo sapiens (Human)	216
O00533	NCHL1_HUMAN	reviewed	Neural cell adhesion molecule L1-like protein (Close homolog of L1) [Cleaved into: Processed neural cell adhesion molecule L1-like protein]	CHL1 CALL	Homo sapiens (Human)	1208
P55160	NCKPL_HUMAN	reviewed	Nck-associated protein 1-like (Hematopoietic protein 1) (Membrane-associated protein HEM-1)	NCKAP1L HEM1	Homo sapiens (Human)	1127
P62166	NCS1_HUMAN	reviewed	Neuronal calcium sensor 1 (NCS-1) (Frequenin homolog) (Frequenin-like protein) (Frequenin-like ubiquitous protein)	NCS1 FLUP FREQ	Homo sapiens (Human)	190
P08473	NEP_HUMAN	reviewed	Neprilysin (EC 3.4.24.11) (Atriopeptidase) (Common acute lymphocytic leukemia antigen) (CALLA) (Enkephalinase) (Neutral endopeptidase 24.11) (NEP) (Neutral endopeptidase) (Skin fibroblast elastase) (SFE) (CD antigen CD10)	MME EPN	Homo sapiens (Human)	750
Q6T4R5	NHS_HUMAN	reviewed	Nance-Horan syndrome protein (Congenital cataracts and dental anomalies protein)	NHS	Homo sapiens (Human)	1651
P29371	NK3R_HUMAN	reviewed	Neuromedin-K receptor (NKR) (NK-3 receptor) (NK-3R) (Neurokinin B receptor) (Tachykinin receptor 3)	TACR3 NK3R TAC3R	Homo sapiens (Human)	465
Q8N2Q7	NLGN1_HUMAN	reviewed	Neuroligin-1	NLGN1 KIAA1070	Homo sapiens (Human)	840
Q8N0W4	NLGNX_HUMAN	reviewed	Neuroligin-4, X-linked (Neuroligin X) (HNLX)	NLGN4X KIAA1260 NLGN4 UNQ365/PRO701	Homo sapiens (Human)	816
P28336	NMBR_HUMAN	reviewed	Neuromedin-B receptor (NMB-R) (Epididymis tissue protein Li 185a) (Neuromedin-B-preferring bombesin receptor)	NMBR	Homo sapiens (Human)	390
Q05586	NMDZ1_HUMAN	reviewed	Glutamate receptor ionotropic, NMDA 1 (GluN1) (Glutamate [NMDA] receptor subunit zeta-1) (N-methyl-D-aspartate receptor subunit NR1) (NMD-R1)	GRIN1 NMDAR1	Homo sapiens (Human)	938
Q92597	NDRG1_HUMAN	reviewed	Protein NDRG1 (Differentiation-related gene 1 protein) (DRG-1) (N-myc downstream-regulated gene 1 protein) (Nickel-specific induction protein Cap43) (Reducing agents and tunicamycin-responsive protein) (RTP) (Rit42)	NDRG1 CAP43 DRG1 RTP	Homo sapiens (Human)	394
Q15599	NHRF2_HUMAN	reviewed	Na(+)/H(+) exchange regulatory cofactor NHE-RF2 (NHERF-2) (NHE3 kinase A regulatory protein E3KARP) (SRY-interacting protein 1) (SIP-1) (Sodium-hydrogen exchanger regulatory factor 2) (Solute carrier family 9 isoform A3 regulatory factor 2) (Tyrosine kinase activator protein 1) (TKA-1)	SLC9A3R2 NHERF2	Homo sapiens (Human)	337
Q9HB89	NMUR1_HUMAN	reviewed	Neuromedin-U receptor 1 (NMU-R1) (G-protein coupled receptor 66) (G-protein coupled receptor FM-3)	NMUR1 GPR66	Homo sapiens (Human)	426
P29475	NOS1_HUMAN	reviewed	Nitric oxide synthase, brain (EC 1.14.13.39) (Constitutive NOS) (NC-NOS) (NOS type I) (Neuronal NOS) (N-NOS) (nNOS) (Peptidyl-cysteine S-nitrosylase NOS1) (bNOS)	NOS1	Homo sapiens (Human)	1434
O60500	NPHN_HUMAN	reviewed	Nephrin (Renal glomerulus-specific cell adhesion receptor)	NPHS1 NPHN	Homo sapiens (Human)	1241
Q6W5P4	NPSR1_HUMAN	reviewed	Neuropeptide S receptor (G-protein coupled receptor 154) (G-protein coupled receptor PGR14) (G-protein coupled receptor for asthma susceptibility)	NPSR1 GPR154 GPRA PGR14	Homo sapiens (Human)	371
Q9NVZ3	NECP2_HUMAN	reviewed	Adaptin ear-binding coat-associated protein 2 (NECAP endocytosis-associated protein 2) (NECAP-2)	NECAP2	Homo sapiens (Human)	263
Q96NY8	NECT4_HUMAN	reviewed	Nectin-4 (Ig superfamily receptor LNIR) (Nectin cell adhesion molecule 4) (Poliovirus receptor-related protein 4) [Cleaved into: Processed poliovirus receptor-related protein 4]	NECTIN4 LNIR PRR4 PVRL4	Homo sapiens (Human)	510
O76050	NEUL1_HUMAN	reviewed	E3 ubiquitin-protein ligase NEURL1 (EC 6.3.2.-) (Neuralized-like protein 1A) (h-neu) (h-neuralized 1) (RING finger protein 67)	NEURL1 NEURL NEURL1A RNF67	Homo sapiens (Human)	574
P17677	NEUM_HUMAN	reviewed	Neuromodulin (Axonal membrane protein GAP-43) (Growth-associated protein 43) (Neural phosphoprotein B-50) (pp46)	GAP43	Homo sapiens (Human)	238
Q8NET5	NFAM1_HUMAN	reviewed	NFAT activation molecule 1 (Calcineurin/NFAT-activating ITAM-containing protein) (NFAT-activating protein with ITAM motif 1)	NFAM1 CNAIP	Homo sapiens (Human)	270
O94856	NFASC_HUMAN	reviewed	Neurofascin	NFASC KIAA0756	Homo sapiens (Human)	1347
Q7RTP0	NIPA1_HUMAN	reviewed	Magnesium transporter NIPA1 (Non-imprinted in Prader-Willi/Angelman syndrome region protein 1) (Spastic paraplegia 6 protein)	NIPA1 SPG6	Homo sapiens (Human)	329
Q969G9	NKD1_HUMAN	reviewed	Protein naked cuticle homolog 1 (Naked-1) (hNkd) (hNkd1)	NKD1 NKD PP7246	Homo sapiens (Human)	470
Q13224	NMDE2_HUMAN	reviewed	Glutamate receptor ionotropic, NMDA 2B (GluN2B) (Glutamate [NMDA] receptor subunit epsilon-2) (N-methyl D-aspartate receptor subtype 2B) (NMDAR2B) (NR2B) (N-methyl-D-aspartate receptor subunit 3) (NR3) (hNR3)	GRIN2B NMDAR2B	Homo sapiens (Human)	1484
Q9GZQ4	NMUR2_HUMAN	reviewed	Neuromedin-U receptor 2 (NMU-R2) (G-protein coupled receptor FM-4) (G-protein coupled receptor TGR-1)	NMUR2 NMU2R TGR1	Homo sapiens (Human)	415
Q9HC29	NOD2_HUMAN	reviewed	Nucleotide-binding oligomerization domain-containing protein 2 (Caspase recruitment domain-containing protein 15) (Inflammatory bowel disease protein 1)	NOD2 CARD15 IBD1	Homo sapiens (Human)	1040
Q9NPH5	NOX4_HUMAN	reviewed	NADPH oxidase 4 (EC 1.6.3.-) (Kidney oxidase-1) (KOX-1) (Kidney superoxide-producing NADPH oxidase) (Renal NAD(P)H-oxidase)	NOX4 RENOX	Homo sapiens (Human)	578
Q4KMZ8	NKAI1_HUMAN	reviewed	Sodium/potassium-transporting ATPase subunit beta-1-interacting protein 1 (Na(+)/K(+)-transporting ATPase subunit beta-1-interacting protein 1) (Protein FAM77C)	NKAIN1 FAM77C	Homo sapiens (Human)	207
O60391	NMD3B_HUMAN	reviewed	Glutamate receptor ionotropic, NMDA 3B (GluN3B) (N-methyl-D-aspartate receptor subtype 3B) (NMDAR3B) (NR3B)	GRIN3B	Homo sapiens (Human)	1043
Q12879	NMDE1_HUMAN	reviewed	Glutamate receptor ionotropic, NMDA 2A (GluN2A) (Glutamate [NMDA] receptor subunit epsilon-1) (N-methyl D-aspartate receptor subtype 2A) (NMDAR2A) (NR2A) (hNR2A)	GRIN2A NMDAR2A	Homo sapiens (Human)	1464
Q14957	NMDE3_HUMAN	reviewed	Glutamate receptor ionotropic, NMDA 2C (GluN2C) (Glutamate [NMDA] receptor subunit epsilon-3) (N-methyl D-aspartate receptor subtype 2C) (NMDAR2C) (NR2C)	GRIN2C NMDAR2C	Homo sapiens (Human)	1233
O15399	NMDE4_HUMAN	reviewed	Glutamate receptor ionotropic, NMDA 2D (GluN2D) (EB11) (Glutamate [NMDA] receptor subunit epsilon-4) (N-methyl D-aspartate receptor subtype 2D) (NMDAR2D) (NR2D)	GRIN2D GluN2D NMDAR2D	Homo sapiens (Human)	1336
Q8IVI9	NOSTN_HUMAN	reviewed	Nostrin (BM247 homolog) (Nitric oxide synthase traffic inducer) (Nitric oxide synthase trafficker) (eNOS-trafficking inducer)	NOSTRIN	Homo sapiens (Human)	506
Q9UM47	NOTC3_HUMAN	reviewed	Neurogenic locus notch homolog protein 3 (Notch 3) [Cleaved into: Notch 3 extracellular truncation; Notch 3 intracellular domain]	NOTCH3	Homo sapiens (Human)	2321
Q9Y5S8	NOX1_HUMAN	reviewed	NADPH oxidase 1 (NOX-1) (EC 1.-.-.-) (Mitogenic oxidase 1) (MOX-1) (NADH/NADPH mitogenic oxidase subunit P65-MOX) (NOH-1)	NOX1 MOX1 NOH1	Homo sapiens (Human)	564
P48145	NPBW1_HUMAN	reviewed	Neuropeptides B/W receptor type 1 (G-protein coupled receptor 7)	NPBWR1 GPR7	Homo sapiens (Human)	328
Q9GZQ6	NPFF1_HUMAN	reviewed	Neuropeptide FF receptor 1 (G-protein coupled receptor 147) (RFamide-related peptide receptor OT7T022)	NPFFR1 GPR147 NPFF1	Homo sapiens (Human)	430
O14511	NRG2_HUMAN	reviewed	Pro-neuregulin-2, membrane-bound isoform (Pro-NRG2) [Cleaved into: Neuregulin-2 (NRG-2) (Divergent of neuregulin-1) (DON-1) (Neural- and thymus-derived activator for ERBB kinases) (NTAK)]	NRG2 NTAK	Homo sapiens (Human)	850
Q92692	NECT2_HUMAN	reviewed	Nectin-2 (Herpes virus entry mediator B) (Herpesvirus entry mediator B) (HveB) (Nectin cell adhesion molecule 2) (Poliovirus receptor-related protein 2) (CD antigen CD112)	NECTIN2 HVEB PRR2 PVRL2	Homo sapiens (Human)	538
Q8IVV8	NKAI4_HUMAN	reviewed	Sodium/potassium-transporting ATPase subunit beta-1-interacting protein 4 (Na(+)/K(+)-transporting ATPase subunit beta-1-interacting protein 4) (Protein FAM77A)	NKAIN4 C20orf58 FAM77A	Homo sapiens (Human)	208
Q8NFZ4	NLGN2_HUMAN	reviewed	Neuroligin-2	NLGN2 KIAA1366	Homo sapiens (Human)	835
P59044	NLRP6_HUMAN	reviewed	NACHT, LRR and PYD domains-containing protein 6 (Angiotensin II/vasopressin receptor) (PYRIN-containing APAF1-like protein 5)	NLRP6 NALP6 PYPAF5	Homo sapiens (Human)	892
Q86UR1	NOXA1_HUMAN	reviewed	NADPH oxidase activator 1 (NOX activator 1) (Antigen NY-CO-31) (NCF2-like protein) (P67phox-like factor) (p51-nox)	NOXA1 P51NOX	Homo sapiens (Human)	476
Q8NFA2	NOXO1_HUMAN	reviewed	NADPH oxidase organizer 1 (NADPH oxidase regulatory protein) (Nox organizer 1) (Nox-organizing protein 1) (SH3 and PX domain-containing protein 5)	NOXO1 P41NOX SH3PXD5	Homo sapiens (Human)	376
P48146	NPBW2_HUMAN	reviewed	Neuropeptides B/W receptor type 2 (G-protein coupled receptor 8)	NPBWR2 GPR8	Homo sapiens (Human)	333
O00476	NPT4_HUMAN	reviewed	Sodium-dependent phosphate transport protein 4 (Na(+)/PI cotransporter 4) (Sodium/phosphate cotransporter 4) (Solute carrier family 17 member 3)	SLC17A3 NPT4	Homo sapiens (Human)	420
P49281	NRAM2_HUMAN	reviewed	Natural resistance-associated macrophage protein 2 (NRAMP 2) (Divalent cation transporter 1) (Divalent metal transporter 1) (DMT-1) (Solute carrier family 11 member 2)	SLC11A2 DCT1 DMT1 NRAMP2 OK/SW-cl.20	Homo sapiens (Human)	568
Q496H8	NRN1L_HUMAN	reviewed	Neuritin-like protein	NRN1L UNQ2446/PRO5725	Homo sapiens (Human)	165
P30989	NTR1_HUMAN	reviewed	Neurotensin receptor type 1 (NT-R-1) (NTR1) (High-affinity levocabastine-insensitive neurotensin receptor) (NTRH)	NTSR1 NTRR	Homo sapiens (Human)	418
Q9P121	NTRI_HUMAN	reviewed	Neurotrimin (hNT) (IgLON family member 2)	NTM IGLON2 NT UNQ297/PRO337	Homo sapiens (Human)	344
Q5T2W1	NHRF3_HUMAN	reviewed	Na(+)/H(+) exchange regulatory cofactor NHE-RF3 (NHERF-3) (CFTR-associated protein of 70 kDa) (Na(+)/H(+) exchanger regulatory factor 3) (Na/Pi cotransporter C-terminal-associated protein 1) (NaPi-Cap1) (PDZ domain-containing protein 1) (Sodium-hydrogen exchanger regulatory factor 3)	PDZK1 CAP70 NHERF3 PDZD1	Homo sapiens (Human)	519
P25103	NK1R_HUMAN	reviewed	Substance-P receptor (SPR) (NK-1 receptor) (NK-1R) (Tachykinin receptor 1)	TACR1 NK1R TAC1R	Homo sapiens (Human)	407
Q8N8D7	NKAI3_HUMAN	reviewed	Sodium/potassium-transporting ATPase subunit beta-1-interacting protein 3 (Na(+)/K(+)-transporting ATPase subunit beta-1-interacting protein 3) (Protein FAM77D)	NKAIN3 FAM77D	Homo sapiens (Human)	197
Q969F2	NKD2_HUMAN	reviewed	Protein naked cuticle homolog 2 (Naked-2) (hNkd2)	NKD2	Homo sapiens (Human)	451
Q8NFZ3	NLGNY_HUMAN	reviewed	Neuroligin-4, Y-linked (Neuroligin Y)	NLGN4Y KIAA0951	Homo sapiens (Human)	816
Q8NA29	NLS1_HUMAN	reviewed	Sodium-dependent lysophosphatidylcholine symporter 1 (NLS1) (Sodium-dependent LPC symporter 1) (Major facilitator superfamily domain-containing protein 2A)	MFSD2A MFSD2 NLS1 HMFN0656 PP9177 UNQ300/PRO341	Homo sapiens (Human)	543
Q9Y239	NOD1_HUMAN	reviewed	Nucleotide-binding oligomerization domain-containing protein 1 (Caspase recruitment domain-containing protein 4)	NOD1 CARD4	Homo sapiens (Human)	953
P49146	NPY2R_HUMAN	reviewed	Neuropeptide Y receptor type 2 (NPY2-R) (NPY-Y2 receptor) (Y2 receptor)	NPY2R	Homo sapiens (Human)	381
Q96EP9	NTCP4_HUMAN	reviewed	Sodium/bile acid cotransporter 4 (Na(+)/bile acid cotransporter 4) (Solute carrier family 10 member 4)	SLC10A4	Homo sapiens (Human)	437
Q96CW9	NTNG2_HUMAN	reviewed	Netrin-G2 (Laminet-2)	NTNG2 KIAA1857 LMNT2 UNQ9381/PRO34206	Homo sapiens (Human)	530
O95665	NTR2_HUMAN	reviewed	Neurotensin receptor type 2 (NT-R-2) (NTR2) (Levocabastine-sensitive neurotensin receptor)	NTSR2	Homo sapiens (Human)	410
Q8N8Q9	NIPA2_HUMAN	reviewed	Magnesium transporter NIPA2 (Non-imprinted in Prader-Willi/Angelman syndrome region protein 2)	NIPA2	Homo sapiens (Human)	360
Q5VXU1	NKAI2_HUMAN	reviewed	Sodium/potassium-transporting ATPase subunit beta-1-interacting protein 2 (Na(+)/K(+)-transporting ATPase subunit beta-1-interacting protein 2) (Protein FAM77B) (T-cell lymphoma breakpoint-associated target protein 1)	NKAIN2 FAM77B TCBA1	Homo sapiens (Human)	208
Q16617	NKG7_HUMAN	reviewed	Protein NKG7 (G-CSF-induced gene 1 protein) (GIG-1 protein) (Granule membrane protein of 17 kDa) (GMP-17) (Natural killer cell protein 7) (p15-TIA-1)	NKG7 GIG1	Homo sapiens (Human)	165
Q9NZ94	NLGN3_HUMAN	reviewed	Neuroligin-3 (Gliotactin homolog)	NLGN3 KIAA1480 NL3	Homo sapiens (Human)	848
Q8TCU5	NMD3A_HUMAN	reviewed	Glutamate receptor ionotropic, NMDA 3A (GluN3A) (N-methyl-D-aspartate receptor subtype 3A) (NMDAR3A) (NR3A) (NMDAR-L)	GRIN3A KIAA1973	Homo sapiens (Human)	1115
P29474	NOS3_HUMAN	reviewed	Nitric oxide synthase, endothelial (EC 1.14.13.39) (Constitutive NOS) (cNOS) (EC-NOS) (Endothelial NOS) (eNOS) (NOS type III) (NOSIII)	NOS3	Homo sapiens (Human)	1203
P46531	NOTC1_HUMAN	reviewed	Neurogenic locus notch homolog protein 1 (Notch 1) (hN1) (Translocation-associated notch protein TAN-1) [Cleaved into: Notch 1 extracellular truncation (NEXT); Notch 1 intracellular domain (NICD)]	NOTCH1 TAN1	Homo sapiens (Human)	2555
Q04721	NOTC2_HUMAN	reviewed	Neurogenic locus notch homolog protein 2 (Notch 2) (hN2) [Cleaved into: Notch 2 extracellular truncation (N2ECD); Notch 2 intracellular domain (N2ICD)]	NOTCH2	Homo sapiens (Human)	2471
Q9UHC9	NPCL1_HUMAN	reviewed	Niemann-Pick C1-like protein 1	NPC1L1	Homo sapiens (Human)	1359
P25929	NPY1R_HUMAN	reviewed	Neuropeptide Y receptor type 1 (NPY1-R)	NPY1R NPYR NPYY1	Homo sapiens (Human)	384
P50391	NPY4R_HUMAN	reviewed	Neuropeptide Y receptor type 4 (NPY4-R) (Pancreatic polypeptide receptor 1) (PP1)	NPY4R PPYR1	Homo sapiens (Human)	375
Q92823	NRCAM_HUMAN	reviewed	Neuronal cell adhesion molecule (Nr-CAM) (Neuronal surface protein Bravo) (hBravo) (NgCAM-related cell adhesion molecule) (Ng-CAM-related)	NRCAM KIAA0343	Homo sapiens (Human)	1304
Q9Y639	NPTN_HUMAN	reviewed	Neuroplastin (Stromal cell-derived receptor 1) (SDR-1)	NPTN SDFR1 SDR1	Homo sapiens (Human)	398
Q68D85	NR3L1_HUMAN	reviewed	Natural cytotoxicity triggering receptor 3 ligand 1 (B7 homolog 6) (B7-H6)	NCR3LG1 B7H6	Homo sapiens (Human)	454
O14786	NRP1_HUMAN	reviewed	Neuropilin-1 (Vascular endothelial cell growth factor 165 receptor) (CD antigen CD304)	NRP1 NRP VEGF165R	Homo sapiens (Human)	923
Q6X4W1	NSMF_HUMAN	reviewed	NMDA receptor synaptonuclear signaling and neuronal migration factor (Nasal embryonic luteinizing hormone-releasing hormone factor) (Nasal embryonic LHRH factor)	NSMF NELF	Homo sapiens (Human)	530
Q8N912	NRAC_HUMAN	reviewed	Nutritionally-regulated adipose and cardiac enriched protein homolog	NRAC C14orf180 C14orf77	Homo sapiens (Human)	160
P56975	NRG3_HUMAN	reviewed	Pro-neuregulin-3, membrane-bound isoform (Pro-NRG3) [Cleaved into: Neuregulin-3 (NRG-3)]	NRG3	Homo sapiens (Human)	720
Q9NPD7	NRN1_HUMAN	reviewed	Neuritin	NRN1 NRN	Homo sapiens (Human)	142
Q86YC3	NRROS_HUMAN	reviewed	Negative regulator of reactive oxygen species (Leucine-rich repeat-containing protein 33)	NRROS LRRC33 UNQ3030/PRO9833	Homo sapiens (Human)	692
P58400	NRX1B_HUMAN	reviewed	Neurexin-1-beta (Neurexin I-beta)	NRXN1	Homo sapiens (Human)	442
Q9Y2I2	NTNG1_HUMAN	reviewed	Netrin-G1 (Laminet-1)	NTNG1 KIAA0976 LMNT1 UNQ571/PRO1133	Homo sapiens (Human)	539
Q16620	NTRK2_HUMAN	reviewed	BDNF/NT-3 growth factors receptor (EC 2.7.10.1) (GP145-TrkB) (Trk-B) (Neurotrophic tyrosine kinase receptor type 2) (TrkB tyrosine kinase) (Tropomyosin-related kinase B)	NTRK2 TRKB	Homo sapiens (Human)	822
Q99466	NOTC4_HUMAN	reviewed	Neurogenic locus notch homolog protein 4 (Notch 4) (hNotch4) [Cleaved into: Notch 4 extracellular truncation; Notch 4 intracellular domain]	NOTCH4 INT3	Homo sapiens (Human)	2003
Q9Y5X5	NPFF2_HUMAN	reviewed	Neuropeptide FF receptor 2 (G-protein coupled receptor 74) (G-protein coupled receptor HLWAR77) (Neuropeptide G-protein coupled receptor)	NPFFR2 GPR74 NPFF2 NPGPR	Homo sapiens (Human)	522
Q15761	NPY5R_HUMAN	reviewed	Neuropeptide Y receptor type 5 (NPY5-R) (NPY-Y5 receptor) (NPYY5-R) (Y5 receptor)	NPY5R NPYR5	Homo sapiens (Human)	445
Q8WWG1	NRG4_HUMAN	reviewed	Pro-neuregulin-4, membrane-bound isoform (Pro-NRG4) [Cleaved into: Neuregulin-4 (NRG-4)]	NRG4	Homo sapiens (Human)	115
P58181	O10A3_HUMAN	reviewed	Olfactory receptor 10A3 (HTPCRX12) (Olfactory receptor OR11-97)	OR10A3	Homo sapiens (Human)	314
Q8NGE5	O10A7_HUMAN	reviewed	Olfactory receptor 10A7 (Olfactory receptor OR12-6)	OR10A7	Homo sapiens (Human)	316
Q8NGE0	O10AD_HUMAN	reviewed	Olfactory receptor 10AD1 (Olfactory receptor OR12-1)	OR10AD1 OR10AD1P	Homo sapiens (Human)	317
Q96KK4	O10C1_HUMAN	reviewed	Olfactory receptor 10C1 (Hs6M1-17) (Olfactory receptor 10C2)	OR10C1 OR10C2	Homo sapiens (Human)	312
Q8NH81	O10G6_HUMAN	reviewed	Olfactory receptor 10G6 (Olfactory receptor OR11-280)	OR10G6 OR10G6P	Homo sapiens (Human)	332
Q8NHC4	O10J5_HUMAN	reviewed	Olfactory receptor 10J5 (Olfactory receptor OR1-28)	OR10J5	Homo sapiens (Human)	309
Q8NGX3	O10T2_HUMAN	reviewed	Olfactory receptor 10T2 (Olfactory receptor OR1-3)	OR10T2	Homo sapiens (Human)	314
Q8NH07	O11H2_HUMAN	reviewed	Olfactory receptor 11H2 (Olfactory receptor OR14-1)	OR11H2 C14orf15 OR11H2P	Homo sapiens (Human)	326
P0DN82	O12D1_HUMAN	reviewed	Olfactory receptor 12D1 (Olfactory receptor 12D1 pseudogene)	OR12D1 OR12D1P	Homo sapiens (Human)	309
Q8NGS9	O13C2_HUMAN	reviewed	Olfactory receptor 13C2 (Olfactory receptor OR9-12)	OR13C2	Homo sapiens (Human)	318
Q8NGS7	O13C8_HUMAN	reviewed	Olfactory receptor 13C8	OR13C8	Homo sapiens (Human)	320
Q8NGZ3	O13G1_HUMAN	reviewed	Olfactory receptor 13G1 (Olfactory receptor OR1-37)	OR13G1	Homo sapiens (Human)	307
Q8NHC5	O14AG_HUMAN	reviewed	Olfactory receptor 14A16 (Olfactory receptor 5AT1) (Olfactory receptor OR1-45)	OR14A16 OR5AT1	Homo sapiens (Human)	309
Q8NGZ2	O14K1_HUMAN	reviewed	Olfactory receptor 14K1 (Olfactory receptor 5AY1) (Olfactory receptor OR1-39)	OR14K1 OR5AY1	Homo sapiens (Human)	314
Q96R47	O2A14_HUMAN	reviewed	Olfactory receptor 2A14 (OST182) (Olfactory receptor 2A6) (Olfactory receptor OR7-12)	OR2A14 OR2A14P OR2A6	Homo sapiens (Human)	310
Q8NG84	O2AK2_HUMAN	reviewed	Olfactory receptor 2AK2 (Olfactory receptor 2AK1) (Olfactory receptor OR1-47)	OR2AK2 OR2AK1P	Homo sapiens (Human)	335
Q8NGZ9	O2T10_HUMAN	reviewed	Olfactory receptor 2T10 (Olfactory receptor OR1-64)	OR2T10	Homo sapiens (Human)	312
Q8NH04	O2T27_HUMAN	reviewed	Olfactory receptor 2T27 (Olfactory receptor OR1-67)	OR2T27	Homo sapiens (Human)	317
Q6IF82	O4A47_HUMAN	reviewed	Olfactory receptor 4A47 (Olfactory receptor OR11-113)	OR4A47	Homo sapiens (Human)	309
Q8NGB8	O4F15_HUMAN	reviewed	Olfactory receptor 4F15 (Olfactory receptor OR15-14)	OR4F15	Homo sapiens (Human)	312
Q8NGJ6	O51A4_HUMAN	reviewed	Olfactory receptor 51A4	OR51A4	Homo sapiens (Human)	313
Q9H339	O51B5_HUMAN	reviewed	Olfactory receptor 51B5 (Odorant receptor HOR5'beta5) (Olfactory receptor OR11-37)	OR51B5	Homo sapiens (Human)	312
Q8TCB6	O51E1_HUMAN	reviewed	Olfactory receptor 51E1 (D-GPCR) (G-protein coupled receptor 164) (Olfactory receptor 52A3) (Prostate-overexpressed G protein-coupled receptor) (Prostate-specific G protein-coupled receptor 2)	OR51E1 GPR164 OR51E1P OR52A3P POGR PSGR2	Homo sapiens (Human)	317
Q9ULB1	NRX1A_HUMAN	reviewed	Neurexin-1 (Neurexin I-alpha) (Neurexin-1-alpha)	NRXN1 KIAA0578	Homo sapiens (Human)	1477
Q9NY59	NSMA2_HUMAN	reviewed	Sphingomyelin phosphodiesterase 3 (EC 3.1.4.12) (Neutral sphingomyelinase 2) (nSMase-2) (nSMase2) (Neutral sphingomyelinase II)	SMPD3	Homo sapiens (Human)	655
P04629	NTRK1_HUMAN	reviewed	High affinity nerve growth factor receptor (EC 2.7.10.1) (Neurotrophic tyrosine kinase receptor type 1) (TRK1-transforming tyrosine kinase protein) (Tropomyosin-related kinase A) (Tyrosine kinase receptor) (Tyrosine kinase receptor A) (Trk-A) (gp140trk) (p140-TrkA)	NTRK1 MTC TRK TRKA	Homo sapiens (Human)	796
Q6IF99	O10K2_HUMAN	reviewed	Olfactory receptor 10K2 (Olfactory receptor OR1-4)	OR10K2	Homo sapiens (Human)	312
Q8NGX6	O10R2_HUMAN	reviewed	Olfactory receptor 10R2 (Olfactory receptor OR1-8)	OR10R2	Homo sapiens (Human)	335
Q8NGF6	O10W1_HUMAN	reviewed	Olfactory receptor 10W1 (Olfactory receptor OR11-236)	OR10W1 OR10W1P UNQ6469/PRO34070	Homo sapiens (Human)	305
Q8NGY1	O10Z1_HUMAN	reviewed	Olfactory receptor 10Z1 (Olfactory receptor OR1-15)	OR10Z1	Homo sapiens (Human)	313
Q9GZK7	O11A1_HUMAN	reviewed	Olfactory receptor 11A1 (Hs6M1-18) (Olfactory receptor 11A2) (Olfactory receptor OR6-30)	OR11A1 OR11A2	Homo sapiens (Human)	315
Q8NGC7	O11H6_HUMAN	reviewed	Olfactory receptor 11H6 (Olfactory receptor OR14-35)	OR11H6	Homo sapiens (Human)	330
B2RN74	O11HC_HUMAN	reviewed	Olfactory receptor 11H12	OR11H12	Homo sapiens (Human)	326
P58182	O12D2_HUMAN	reviewed	Olfactory receptor 12D2 (Hs6M1-20) (Olfactory receptor OR6-28)	OR12D2	Homo sapiens (Human)	307
Q8NGS8	O13C5_HUMAN	reviewed	Olfactory receptor 13C5 (Olfactory receptor OR9-11)	OR13C5	Homo sapiens (Human)	318
Q9UGF5	O14J1_HUMAN	reviewed	Olfactory receptor 14J1 (Hs6M1-28) (Olfactory receptor 5U1) (Olfactory receptor OR6-25)	OR14J1 OR5U1	Homo sapiens (Human)	321
A4D2G3	O2A25_HUMAN	reviewed	Olfactory receptor 2A25 (Olfactory receptor 2A27)	OR2A25 OR2A25P OR2A27	Homo sapiens (Human)	310
A6NND4	O2AT4_HUMAN	reviewed	Olfactory receptor 2AT4 (Olfactory receptor OR11-265)	OR2AT4	Homo sapiens (Human)	320
Q8NH02	O2T29_HUMAN	reviewed	Olfactory receptor 2T29	OR2T29	Homo sapiens (Human)	315
Q8NGX1	O2T34_HUMAN	reviewed	Olfactory receptor 2T34 (Olfactory receptor OR1-63)	OR2T34	Homo sapiens (Human)	318
Q8NH70	O4A16_HUMAN	reviewed	Olfactory receptor 4A16 (Olfactory receptor OR11-117)	OR4A16	Homo sapiens (Human)	328
Q8NGA8	O4F17_HUMAN	reviewed	Olfactory receptor 4F17 (Olfactory receptor 4F11) (Olfactory receptor 4F18) (Olfactory receptor 4F19)	OR4F17 OR4F11P OR4F18 OR4F19	Homo sapiens (Human)	305
Q9Y5P1	O51B2_HUMAN	reviewed	Olfactory receptor 51B2 (Odorant receptor HOR5'beta3) (Olfactory receptor 51B1)	OR51B2 OR51B1P	Homo sapiens (Human)	312
Q15743	OGR1_HUMAN	reviewed	Ovarian cancer G-protein coupled receptor 1 (OGR-1) (G-protein coupled receptor 68) (GPR12A) (Sphingosylphosphorylcholine receptor)	GPR68 OGR1	Homo sapiens (Human)	365
P23515	OMGP_HUMAN	reviewed	Oligodendrocyte-myelin glycoprotein	OMG OMGP	Homo sapiens (Human)	440
Q96PE5	OPALI_HUMAN	reviewed	Opalin (Oligodendrocytic myelin paranodal and inner loop protein) (Transmembrane protein 10)	OPALIN HTMP10 TMEM10	Homo sapiens (Human)	141
Q9GZY6	NTAL_HUMAN	reviewed	Linker for activation of T-cells family member 2 (Linker for activation of B-cells) (Membrane-associated adapter molecule) (Non-T-cell activation linker) (Williams-Beuren syndrome chromosomal region 15 protein) (Williams-Beuren syndrome chromosomal region 5 protein)	LAT2 LAB NTAL WBS15 WBSCR15 WBSCR5 HSPC046	Homo sapiens (Human)	243
Q9H209	O10A4_HUMAN	reviewed	Olfactory receptor 10A4 (HP2) (Olfactory receptor-like protein JCG5)	OR10A4 OR10A4P	Homo sapiens (Human)	315
Q8NGN7	O10D4_HUMAN	reviewed	Putative olfactory receptor 10D4	OR10D4P OR10D4	Homo sapiens (Human)	298
Q8NGC4	O10G3_HUMAN	reviewed	Olfactory receptor 10G3 (Olfactory receptor OR14-40)	OR10G3	Homo sapiens (Human)	313
Q8NGN5	O10G8_HUMAN	reviewed	Olfactory receptor 10G8 (Olfactory receptor OR11-282)	OR10G8	Homo sapiens (Human)	311
Q9Y4A9	O10H1_HUMAN	reviewed	Olfactory receptor 10H1 (Olfactory receptor OR19-27)	OR10H1	Homo sapiens (Human)	318
Q8NGA6	O10H5_HUMAN	reviewed	Olfactory receptor 10H5 (Olfactory receptor OR19-25) (Olfactory receptor OR19-26)	OR10H5	Homo sapiens (Human)	315
Q5JRS4	O10J3_HUMAN	reviewed	Olfactory receptor 10J3	OR10J3 OR10J3P	Homo sapiens (Human)	329
Q8NGT0	O13C9_HUMAN	reviewed	Olfactory receptor 13C9 (Olfactory receptor OR9-13)	OR13C9	Homo sapiens (Human)	318
Q8NHC7	O14CZ_HUMAN	reviewed	Olfactory receptor 14C36 (Olfactory receptor 5BF1) (Olfactory receptor OR1-59)	OR14C36 OR5BF1	Homo sapiens (Human)	312
Q8NGT7	O2A12_HUMAN	reviewed	Olfactory receptor 2A12 (Olfactory receptor OR7-10)	OR2A12 OR2A12P	Homo sapiens (Human)	310
Q9H205	O2AG1_HUMAN	reviewed	Olfactory receptor 2AG1 (HT3) (Olfactory receptor 2AG3) (Olfactory receptor OR11-79)	OR2AG1 OR2AG3	Homo sapiens (Human)	316
A6NMZ5	O4C45_HUMAN	reviewed	Olfactory receptor 4C45	OR4C45	Homo sapiens (Human)	311
A6NHA9	O4C46_HUMAN	reviewed	Olfactory receptor 4C46	OR4C46	Homo sapiens (Human)	309
Q8NH64	O51A7_HUMAN	reviewed	Olfactory receptor 51A7 (Olfactory receptor OR11-27)	OR51A7	Homo sapiens (Human)	312
Q9H340	O51B6_HUMAN	reviewed	Olfactory receptor 51B6 (Odorant receptor HOR5'beta6)	OR51B6	Homo sapiens (Human)	312
Q9H344	O51I2_HUMAN	reviewed	Olfactory receptor 51I2 (Odorant receptor HOR5'beta12) (Olfactory receptor OR11-38)	OR51I2	Homo sapiens (Human)	312
Q8NGJ5	O51L1_HUMAN	reviewed	Olfactory receptor 51L1 (Olfactory receptor OR11-31)	OR51L1	Homo sapiens (Human)	315
Q9UKL2	O52A1_HUMAN	reviewed	Olfactory receptor 52A1 (HPFH1OR) (Odorant receptor HOR3'beta4) (Olfactory receptor OR11-319)	OR52A1	Homo sapiens (Human)	312
Q8NGF0	O52B6_HUMAN	reviewed	Olfactory receptor 52B6 (Olfactory receptor OR11-47)	OR52B6	Homo sapiens (Human)	335
Q96RD3	O52E6_HUMAN	reviewed	Olfactory receptor 52E6 (Olfactory receptor OR11-58)	OR52E6	Homo sapiens (Human)	313
Q8NGK3	O52K2_HUMAN	reviewed	Olfactory receptor 52K2 (Olfactory receptor OR11-7)	OR52K2	Homo sapiens (Human)	314
Q8NH53	O52N1_HUMAN	reviewed	Olfactory receptor 52N1 (Olfactory receptor OR11-61)	OR52N1	Homo sapiens (Human)	320
Q8NGF1	O52R1_HUMAN	reviewed	Olfactory receptor 52R1 (Olfactory receptor OR11-22)	OR52R1	Homo sapiens (Human)	315
P0C617	O5AL1_HUMAN	reviewed	Olfactory receptor 5AL1 (Olfactory receptor OR11-184)	OR5AL1 OR5AL1P	Homo sapiens (Human)	328
Q8NGC0	O5AU1_HUMAN	reviewed	Olfactory receptor 5AU1 (Olfactory receptor OR14-38)	OR5AU1	Homo sapiens (Human)	362
A6NJZ3	O6C65_HUMAN	reviewed	Olfactory receptor 6C65	OR6C65	Homo sapiens (Human)	312
A6NCV1	O6C74_HUMAN	reviewed	Olfactory receptor 6C74	OR6C74	Homo sapiens (Human)	312
Q16625	OCLN_HUMAN	reviewed	Occludin	OCLN	Homo sapiens (Human)	522
O15294	OGT1_HUMAN	reviewed	UDP-N-acetylglucosamine--peptide N-acetylglucosaminyltransferase 110 kDa subunit (EC 2.4.1.255) (O-GlcNAc transferase subunit p110) (O-linked N-acetylglucosamine transferase 110 kDa subunit) (OGT)	OGT	Homo sapiens (Human)	1046
P41146	OPRX_HUMAN	reviewed	Nociceptin receptor (Kappa-type 3 opioid receptor) (KOR-3) (Orphanin FQ receptor)	OPRL1 OOR ORL1	Homo sapiens (Human)	370
Q8NGR2	OR1L6_HUMAN	reviewed	Olfactory receptor 1L6 (Olfactory receptor 1L7) (Olfactory receptor OR9-30)	OR1L6 OR1L7	Homo sapiens (Human)	347
Q8NGT9	OR2A1_HUMAN	reviewed	Olfactory receptor 2A1/2A42 (Olfactory receptor OR7-16) (Olfactory receptor OR7-19)	OR2A1; OR2A42	Homo sapiens (Human)	310
O95047	OR2A4_HUMAN	reviewed	Olfactory receptor 2A4 (Olfactory receptor 2A10) (Olfactory receptor OR6-37)	OR2A4 OR2A10	Homo sapiens (Human)	310
O76000	OR2B3_HUMAN	reviewed	Putative olfactory receptor 2B3 (Hs6M1-1) (Olfactory receptor OR6-14) (OR6-4) (Olfactory receptor 6-4)	OR2B3 OR2B3P	Homo sapiens (Human)	313
Q13607	OR2F1_HUMAN	reviewed	Olfactory receptor 2F1 (Olfactory receptor 2F3) (Olfactory receptor 2F4) (Olfactory receptor 2F5) (Olfactory receptor-like protein OLF3)	OR2F1 OLF3 OR2F3 OR2F3P OR2F4 OR2F5	Homo sapiens (Human)	317
Q8NGU4	OR2I1_HUMAN	reviewed	Putative olfactory receptor 2I1 (Putative olfactory receptor 2I2) (Putative olfactory receptor 2I3) (Putative olfactory receptor 2I4)	OR2I1P OR2I2 OR2I3P OR2I4P	Homo sapiens (Human)	316
O76002	OR2J2_HUMAN	reviewed	Olfactory receptor 2J2 (Hs6M1-6) (Olfactory receptor 6-8) (OR6-8) (Olfactory receptor OR6-19)	OR2J2	Homo sapiens (Human)	312
Q96R28	OR2M2_HUMAN	reviewed	Olfactory receptor 2M2 (OST423)	OR2M2	Homo sapiens (Human)	347
Q8NG81	OR2M7_HUMAN	reviewed	Olfactory receptor 2M7 (Olfactory receptor OR1-58)	OR2M7	Homo sapiens (Human)	312
Q8NH00	OR2T4_HUMAN	reviewed	Olfactory receptor 2T4 (Olfactory receptor OR1-60)	OR2T4	Homo sapiens (Human)	348
Q8NHB1	OR2V1_HUMAN	reviewed	Olfactory receptor 2V1	OR2V1	Homo sapiens (Human)	315
Q8NHA6	OR2W6_HUMAN	reviewed	Putative olfactory receptor 2W6 (Olfactory receptor OR6-3) (Putative olfactory receptor 2W7)	OR2W6P OR2W7P	Homo sapiens (Human)	318
Q8NG97	OR2Z1_HUMAN	reviewed	Olfactory receptor 2Z1 (Olfactory receptor 2Z2) (Olfactory receptor OR19-4)	OR2Z1 OR2Z2	Homo sapiens (Human)	314
P47893	OR3A2_HUMAN	reviewed	Olfactory receptor 3A2 (Olfactory receptor 17-228) (OR17-228) (Olfactory receptor OR17-14)	OR3A2 OLFRA04	Homo sapiens (Human)	321
Q8NH37	OR4C3_HUMAN	reviewed	Olfactory receptor 4C3 (Olfactory receptor OR11-98)	OR4C3	Homo sapiens (Human)	302
Q96R67	OR4CC_HUMAN	reviewed	Olfactory receptor 4C12 (Olfactory receptor OR11-259)	OR4C12	Homo sapiens (Human)	309
Q8NGM1	OR4CF_HUMAN	reviewed	Olfactory receptor 4C15 (Olfactory receptor OR11-127) (Olfactory receptor OR11-134)	OR4C15	Homo sapiens (Human)	316
Q15615	OR4D1_HUMAN	reviewed	Olfactory receptor 4D1 (Olfactory receptor 4D3) (Olfactory receptor TPCR16)	OR4D1 OR4D3	Homo sapiens (Human)	310
Q8NGJ1	OR4D6_HUMAN	reviewed	Olfactory receptor 4D6 (Olfactory receptor OR11-250)	OR4D6	Homo sapiens (Human)	314
Q8NGI4	OR4DB_HUMAN	reviewed	Olfactory receptor 4D11	OR4D11 OR4D11P	Homo sapiens (Human)	311
Q8NGC2	OR4E2_HUMAN	reviewed	Olfactory receptor 4E2 (Olfactory receptor OR14-42)	OR4E2	Homo sapiens (Human)	313
Q6IEY1	OR4F3_HUMAN	reviewed	Olfactory receptor 4F3/4F16/4F29 (Olfactory receptor OR1-1)	OR4F3; OR4F16; OR4F29	Homo sapiens (Human)	312
Q96R72	OR4K3_HUMAN	reviewed	Olfactory receptor 4K3 (Olfactory receptor OR14-14)	OR4K3 OR4K3P	Homo sapiens (Human)	315
Q8NH73	OR4S2_HUMAN	reviewed	Olfactory receptor 4S2 (Olfactory receptor OR11-137)	OR4S2 OR4S2P	Homo sapiens (Human)	311
Q8NH48	OR5B3_HUMAN	reviewed	Olfactory receptor 5B3 (Olfactory receptor 5B13) (Olfactory receptor OR11-239)	OR5B3 OR5B13	Homo sapiens (Human)	314
A6NL26	OR5BL_HUMAN	reviewed	Olfactory receptor 5B21	OR5B21	Homo sapiens (Human)	309
Q8NGL4	OR5DD_HUMAN	reviewed	Olfactory receptor 5D13 (Olfactory receptor OR11-142) (Olfactory receptor OR11-148)	OR5D13	Homo sapiens (Human)	314
Q8NGK9	OR5DG_HUMAN	reviewed	Olfactory receptor 5D16 (Olfactory receptor OR11-154)	OR5D16	Homo sapiens (Human)	328
O95221	OR5F1_HUMAN	reviewed	Olfactory receptor 5F1 (Olfactory receptor 11-10) (OR11-10) (Olfactory receptor OR11-167)	OR5F1	Homo sapiens (Human)	314
Q8NGV6	OR5H6_HUMAN	reviewed	Olfactory receptor 5H6 (Olfactory receptor OR3-11)	OR5H6	Homo sapiens (Human)	325
A6NET4	OR5K3_HUMAN	reviewed	Olfactory receptor 5K3	OR5K3	Homo sapiens (Human)	321
O95007	OR6B1_HUMAN	reviewed	Olfactory receptor 6B1 (Olfactory receptor 7-3) (OR7-3) (Olfactory receptor OR7-9)	OR6B1	Homo sapiens (Human)	311
Q9NZP0	OR6C3_HUMAN	reviewed	Olfactory receptor 6C3 (HSA8)	OR6C3	Homo sapiens (Human)	311
Q8NGC5	OR6J1_HUMAN	reviewed	Olfactory receptor 6J1 (Olfactory receptor 6J2)	OR6J1 OR6J2	Homo sapiens (Human)	347
Q8NGX9	OR6P1_HUMAN	reviewed	Olfactory receptor 6P1 (Olfactory receptor OR1-12)	OR6P1	Homo sapiens (Human)	317
Q8NGN1	OR6T1_HUMAN	reviewed	Olfactory receptor 6T1 (Olfactory receptor OR11-277)	OR6T1	Homo sapiens (Human)	323
Q8NGX8	OR6Y1_HUMAN	reviewed	Olfactory receptor 6Y1 (Olfactory receptor 6Y2) (Olfactory receptor OR1-11)	OR6Y1 OR6Y2	Homo sapiens (Human)	325
Q15622	OR7A5_HUMAN	reviewed	Olfactory receptor 7A5 (Olfactory receptor OR19-17) (Olfactory receptor TPCR92)	OR7A5	Homo sapiens (Human)	319
Q96RA2	OR7D2_HUMAN	reviewed	Olfactory receptor 7D2 (HTPCRH03) (Olfactory receptor 19-4) (OR19-4) (Olfactory receptor OR19-10)	OR7D2	Homo sapiens (Human)	312
Q8NGG7	OR8A1_HUMAN	reviewed	Olfactory receptor 8A1 (OST025) (Olfactory receptor OR11-318)	OR8A1	Homo sapiens (Human)	326
Q8NGG6	OR8BC_HUMAN	reviewed	Olfactory receptor 8B12 (Olfactory receptor OR11-317)	OR8B12	Homo sapiens (Human)	310
Q8NGM9	OR8D4_HUMAN	reviewed	Olfactory receptor 8D4 (Olfactory receptor OR11-275)	OR8D4	Homo sapiens (Human)	314
Q8NGG5	OR8K1_HUMAN	reviewed	Olfactory receptor 8K1 (Olfactory receptor OR11-182)	OR8K1	Homo sapiens (Human)	319
P0C7N1	OR8U8_HUMAN	reviewed	Olfactory receptor 8U8	OR8U8	Homo sapiens (Human)	319
Q8NGU1	OR9A1_HUMAN	reviewed	Putative olfactory receptor 9A1 (HSHTPRX06)	OR9A1P OR9A1	Homo sapiens (Human)	263
Q8NH87	OR9G1_HUMAN	reviewed	Olfactory receptor 9G1 (Olfactory receptor 9G5) (Olfactory receptor OR11-114)	OR9G1 OR9G5	Homo sapiens (Human)	305
Q8NGQ6	OR9I1_HUMAN	reviewed	Olfactory receptor 9I1 (Olfactory receptor OR11-228)	OR9I1	Homo sapiens (Human)	314
Q8NH08	O10AC_HUMAN	reviewed	Olfactory receptor 10AC1 (Olfactory receptor OR7-5)	OR10AC1 OR10AC1P	Homo sapiens (Human)	325
Q8NH19	O10AG_HUMAN	reviewed	Olfactory receptor 10AG1 (Olfactory receptor OR11-160)	OR10AG1	Homo sapiens (Human)	301
Q8NGN6	O10G7_HUMAN	reviewed	Olfactory receptor 10G7 (Olfactory receptor OR11-283)	OR10G7	Homo sapiens (Human)	311
O60404	O10H3_HUMAN	reviewed	Olfactory receptor 10H3 (Olfactory receptor OR19-24)	OR10H3	Homo sapiens (Human)	316
P0C629	O10J4_HUMAN	reviewed	Olfactory receptor 10J4	OR10J4 OR10J4P	Homo sapiens (Human)	311
Q8NGE3	O10P1_HUMAN	reviewed	Olfactory receptor 10P1 (Olfactory receptor 10P2) (Olfactory receptor 10P3) (Olfactory receptor OR12-7)	OR10P1 OR10P1P OR10P2P OR10P3P	Homo sapiens (Human)	313
Q8NGC9	O11H4_HUMAN	reviewed	Olfactory receptor 11H4 (Olfactory receptor OR14-36)	OR11H4	Homo sapiens (Human)	324
Q8NGX0	O11L1_HUMAN	reviewed	Olfactory receptor 11L1	OR11L1	Homo sapiens (Human)	322
Q9UGF7	O12D3_HUMAN	reviewed	Olfactory receptor 12D3 (Hs6M1-27) (Olfactory receptor OR6-27)	OR12D3	Homo sapiens (Human)	316
Q8NGS6	O13C3_HUMAN	reviewed	Olfactory receptor 13C3 (Olfactory receptor OR9-8)	OR13C3	Homo sapiens (Human)	347
P0DN81	O13C7_HUMAN	reviewed	Olfactory receptor 13C7	OR13C7 OR13C7P	Homo sapiens (Human)	318
Q8NGV5	O13D1_HUMAN	reviewed	Olfactory receptor 13D1 (Olfactory receptor OR9-15)	OR13D1	Homo sapiens (Human)	346
Q8NG92	O13H1_HUMAN	reviewed	Olfactory receptor 13H1 (Olfactory receptor ORX-1)	OR13H1	Homo sapiens (Human)	308
Q8NGZ0	O2AJ1_HUMAN	reviewed	Olfactory receptor 2AJ1	OR2AJ1 OR2AJ1P	Homo sapiens (Human)	328
Q8NG77	O2T12_HUMAN	reviewed	Olfactory receptor 2T12 (Olfactory receptor OR1-57)	OR2T12	Homo sapiens (Human)	320
Q8NGX2	O2T35_HUMAN	reviewed	Olfactory receptor 2T35 (Olfactory receptor OR1-66)	OR2T35	Homo sapiens (Human)	323
Q8NGL6	O4A15_HUMAN	reviewed	Olfactory receptor 4A15 (Olfactory receptor OR11-118)	OR4A15	Homo sapiens (Human)	344
Q8NGJ7	O51A2_HUMAN	reviewed	Olfactory receptor 51A2	OR51A2	Homo sapiens (Human)	313
Q9Y5P0	O51B4_HUMAN	reviewed	Olfactory receptor 51B4 (Odorant receptor HOR5'beta1)	OR51B4	Homo sapiens (Human)	310
A6NGY5	O51F1_HUMAN	reviewed	Olfactory receptor 51F1	OR51F1 OR51F1P	Homo sapiens (Human)	319
Q8NGK0	O51G2_HUMAN	reviewed	Olfactory receptor 51G2 (Olfactory receptor OR11-28)	OR51G2	Homo sapiens (Human)	314
Q8NGK2	O52B4_HUMAN	reviewed	Olfactory receptor 52B4 (Olfactory receptor OR11-3)	OR52B4	Homo sapiens (Human)	314
Q8NGJ4	O52E2_HUMAN	reviewed	Olfactory receptor 52E2	OR52E2	Homo sapiens (Human)	325
Q8NGJ2	O52H1_HUMAN	reviewed	Olfactory receptor 52H1 (Olfactory receptor OR11-45)	OR52H1	Homo sapiens (Human)	320
Q8NH60	O52J3_HUMAN	reviewed	Olfactory receptor 52J3 (Olfactory receptor OR11-32)	OR52J3	Homo sapiens (Human)	311
Q8NGK5	O52M1_HUMAN	reviewed	Olfactory receptor 52M1 (Olfactory receptor OR11-11)	OR52M1 OR52M1P	Homo sapiens (Human)	317
Q8NGI2	O52N4_HUMAN	reviewed	Olfactory receptor 52N4 (Olfactory receptor OR11-64)	OR52N4	Homo sapiens (Human)	321
Q8NGH5	O56A1_HUMAN	reviewed	Olfactory receptor 56A1 (Olfactory receptor OR11-75)	OR56A1	Homo sapiens (Human)	318
Q8NGI1	O56B2_HUMAN	reviewed	Putative olfactory receptor 56B2	OR56B2P	Homo sapiens (Human)	322
P0C628	O5AC1_HUMAN	reviewed	Olfactory receptor 5AC1 (Olfactory receptor OR3-2)	OR5AC1 OR5AC1P	Homo sapiens (Human)	307
Q8NH90	O5AK2_HUMAN	reviewed	Olfactory receptor 5AK2	OR5AK2	Homo sapiens (Human)	309
Q8NGI8	O5AN1_HUMAN	reviewed	Olfactory receptor 5AN1 (Olfactory receptor OR11-244)	OR5AN1	Homo sapiens (Human)	311
Q8N127	O5AS1_HUMAN	reviewed	Olfactory receptor 5AS1 (Olfactory receptor OR11-168)	OR5AS1	Homo sapiens (Human)	324
A6NDH6	O5H15_HUMAN	reviewed	Olfactory receptor 5H15	OR5H15	Homo sapiens (Human)	313
A6NIJ9	O6C70_HUMAN	reviewed	Olfactory receptor 6C70	OR6C70	Homo sapiens (Human)	312
Q6IFN5	O7E24_HUMAN	reviewed	Olfactory receptor 7E24 (Olfactory receptor OR19-14)	OR7E24 OR7E24P	Homo sapiens (Human)	339
Q15612	OR1Q1_HUMAN	reviewed	Olfactory receptor 1Q1 (OST226) (Olfactory receptor 1Q2) (Olfactory receptor 1Q3) (Olfactory receptor 9-A) (OR9-A) (Olfactory receptor OR9-25) (Olfactory receptor TPCR106)	OR1Q1 OR1Q2 OR1Q3	Homo sapiens (Human)	314
Q8NG85	OR2L3_HUMAN	reviewed	Olfactory receptor 2L3	OR2L3	Homo sapiens (Human)	312
A3KFT3	OR2M5_HUMAN	reviewed	Olfactory receptor 2M5	OR2M5 OR2M5P	Homo sapiens (Human)	312
Q6IF00	OR2T2_HUMAN	reviewed	Olfactory receptor 2T2 (Olfactory receptor OR1-43)	OR2T2 OR2T2P	Homo sapiens (Human)	324
A6NFC9	OR2W5_HUMAN	reviewed	Putative olfactory receptor 2W5	OR2W5 OR2W5P	Homo sapiens (Human)	320
Q8NGB2	OR4C5_HUMAN	reviewed	Olfactory receptor 4C5 (Olfactory receptor OR11-99)	OR4C5	Homo sapiens (Human)	326
Q6IEV9	OR4CB_HUMAN	reviewed	Olfactory receptor 4C11 (Olfactory receptor OR11-136)	OR4C11 OR4C11P	Homo sapiens (Human)	310
Q8NGP0	OR4CD_HUMAN	reviewed	Olfactory receptor 4C13 (Olfactory receptor OR11-260)	OR4C13	Homo sapiens (Human)	309
Q8NGN0	OR4D5_HUMAN	reviewed	Olfactory receptor 4D5 (Olfactory receptor OR11-276)	OR4D5	Homo sapiens (Human)	318
Q8NGI6	OR4DA_HUMAN	reviewed	Olfactory receptor 4D10 (Olfactory receptor OR11-251)	OR4D10 OR4D10P	Homo sapiens (Human)	311
P0C645	OR4E1_HUMAN	reviewed	Olfactory receptor 4E1 (Olfactory receptor OR14-43)	OR4E1 OR4E1P	Homo sapiens (Human)	316
Q96R69	OR4F4_HUMAN	reviewed	Olfactory receptor 4F4 (HS14a-1-A) (Olfactory receptor OR19-3)	OR4F4	Homo sapiens (Human)	305
Q8NGD2	OR4K2_HUMAN	reviewed	Olfactory receptor 4K2 (Olfactory receptor OR14-15)	OR4K2	Homo sapiens (Human)	314
Q8NH41	OR4KF_HUMAN	reviewed	Olfactory receptor 4K15 (Olfactory receptor OR14-20)	OR4K15	Homo sapiens (Human)	348
Q8NGD1	OR4N2_HUMAN	reviewed	Olfactory receptor 4N2 (Olfactory receptor OR14-13) (Olfactory receptor OR14-8)	OR4N2	Homo sapiens (Human)	307
Q8IXE1	OR4N5_HUMAN	reviewed	Olfactory receptor 4N5 (Olfactory receptor OR14-33)	OR4N5	Homo sapiens (Human)	308
P0C623	OR4Q2_HUMAN	reviewed	Olfactory receptor 4Q2 (olfactory receptor OR14-21)	OR4Q2 OR4Q2P	Homo sapiens (Human)	313
Q8NGF9	OR4X2_HUMAN	reviewed	Olfactory receptor 4X2 (Olfactory receptor OR11-105)	OR4X2	Homo sapiens (Human)	303
Q8NH18	OR5J2_HUMAN	reviewed	Olfactory receptor 5J2 (Olfactory receptor OR11-266)	OR5J2	Homo sapiens (Human)	312
Q8NHB8	OR5K2_HUMAN	reviewed	Olfactory receptor 5K2 (Olfactory receptor OR3-9)	OR5K2	Homo sapiens (Human)	316
Q8NGL0	OR5L2_HUMAN	reviewed	Olfactory receptor 5L2 (HTPCRX16) (Olfactory receptor OR11-153)	OR5L2	Homo sapiens (Human)	311
Q8NGP6	OR5M8_HUMAN	reviewed	Olfactory receptor 5M8 (Olfactory receptor OR11-194)	OR5M8	Homo sapiens (Human)	311
Q8WZ94	OR5P3_HUMAN	reviewed	Olfactory receptor 5P3 (Olfactory receptor OR11-94) (Olfactory receptor-like protein JCG1)	OR5P3	Homo sapiens (Human)	311
Q8NGG2	OR5T2_HUMAN	reviewed	Olfactory receptor 5T2 (Olfactory receptor OR11-177)	OR5T2	Homo sapiens (Human)	359
Q8NH69	OR5W2_HUMAN	reviewed	Olfactory receptor 5W2 (Olfactory receptor 5W3) (Olfactory receptor OR11-155)	OR5W2 OR5W2P OR5W3P	Homo sapiens (Human)	310
Q6IFH4	OR6B2_HUMAN	reviewed	Olfactory receptor 6B2 (Olfactory receptor OR2-1)	OR6B2 OR6B2P	Homo sapiens (Human)	312
Q9NZP2	OR6C2_HUMAN	reviewed	Olfactory receptor 6C2 (HSA3)	OR6C2	Homo sapiens (Human)	312
A6NF89	OR6C6_HUMAN	reviewed	Olfactory receptor 6C6	OR6C6	Homo sapiens (Human)	314
Q8NGY3	OR6K3_HUMAN	reviewed	Olfactory receptor 6K3 (Olfactory receptor OR1-18)	OR6K3	Homo sapiens (Human)	331
Q8NGY5	OR6N1_HUMAN	reviewed	Olfactory receptor 6N1	OR6N1	Homo sapiens (Human)	312
Q8NG98	OR7D4_HUMAN	reviewed	Olfactory receptor 7D4 (OR19-B) (Odorant receptor family subfamily D member 4RT) (Olfactory receptor OR19-7)	OR7D4 OR7D4P	Homo sapiens (Human)	312
Q96RC9	OR8B4_HUMAN	reviewed	Olfactory receptor 8B4 (Olfactory receptor OR11-315)	OR8B4 OR8B4P	Homo sapiens (Human)	309
Q15617	OR8G1_HUMAN	reviewed	Olfactory receptor 8G1 (Olfactory receptor OR11-281) (Olfactory receptor TPCR25)	OR8G1 OR8G1P	Homo sapiens (Human)	311
Q8N0Y5	OR8I2_HUMAN	reviewed	Olfactory receptor 8I2 (Olfactory receptor OR11-170)	OR8I2	Homo sapiens (Human)	310
Q8NGG0	OR8J3_HUMAN	reviewed	Olfactory receptor 8J3 (Olfactory receptor OR11-173)	OR8J3	Homo sapiens (Human)	315
Q8NH50	OR8K5_HUMAN	reviewed	Olfactory receptor 8K5 (Olfactory receptor OR11-174)	OR8K5	Homo sapiens (Human)	307
P0C7N8	OR9G9_HUMAN	reviewed	Olfactory receptor 9G9	OR9G9	Homo sapiens (Human)	305
Q8NGQ5	OR9Q1_HUMAN	reviewed	Olfactory receptor 9Q1	OR9Q1	Homo sapiens (Human)	310
Q6ZRI0	OTOG_HUMAN	reviewed	Otogelin	OTOG OTGN	Homo sapiens (Human)	2925
Q9H208	O10A2_HUMAN	reviewed	Olfactory receptor 10A2 (HP4) (Olfactory receptor OR11-86)	OR10A2 OR10A2P	Homo sapiens (Human)	303
Q8NH74	O10A6_HUMAN	reviewed	Olfactory receptor 10A6 (Olfactory receptor OR11-96)	OR10A6	Homo sapiens (Human)	314
Q8NH80	O10D3_HUMAN	reviewed	Putative olfactory receptor 10D3 (HTPCRX09) (Olfactory receptor OR11-293)	OR10D3 OR10D3P	Homo sapiens (Human)	312
Q8NGC3	O10G2_HUMAN	reviewed	Olfactory receptor 10G2	OR10G2	Homo sapiens (Human)	310
Q8NGN3	O10G4_HUMAN	reviewed	Olfactory receptor 10G4 (Olfactory receptor OR11-278)	OR10G4	Homo sapiens (Human)	311
Q8NGN4	O10G9_HUMAN	reviewed	Olfactory receptor 10G9 (Olfactory receptor 10G10)	OR10G9 OR10G10P	Homo sapiens (Human)	311
O60403	O10H2_HUMAN	reviewed	Olfactory receptor 10H2 (Olfactory receptor OR19-23)	OR10H2	Homo sapiens (Human)	315
Q8NGA5	O10H4_HUMAN	reviewed	Olfactory receptor 10H4 (Olfactory receptor OR19-28)	OR10H4	Homo sapiens (Human)	316
P30954	O10J1_HUMAN	reviewed	Olfactory receptor 10J1 (Olfactory receptor OR1-26) (Olfactory receptor-like protein HGMP07J)	OR10J1	Homo sapiens (Human)	320
Q8NGY7	O10J6_HUMAN	reviewed	Putative olfactory receptor 10J6	OR10J6P OR10J6	Homo sapiens (Human)	276
Q8NGQ4	O10Q1_HUMAN	reviewed	Olfactory receptor 10Q1 (Olfactory receptor OR11-233)	OR10Q1	Homo sapiens (Human)	319
Q8NGI7	O10V1_HUMAN	reviewed	Olfactory receptor 10V1 (Olfactory receptor OR11-256)	OR10V1	Homo sapiens (Human)	309
Q8NGY0	O10X1_HUMAN	reviewed	Olfactory receptor 10X1 (Olfactory receptor OR1-14)	OR10X1 OR10X1P	Homo sapiens (Human)	326
Q8NGC1	O11G2_HUMAN	reviewed	Olfactory receptor 11G2 (Olfactory receptor OR14-34)	OR11G2	Homo sapiens (Human)	345
Q8NGC8	O11H7_HUMAN	reviewed	Olfactory receptor 11H7 (Olfactory receptor OR14-32)	OR11H7 OR11H7P	Homo sapiens (Human)	314
Q8NH95	O13C6_HUMAN	reviewed	Putative olfactory receptor 13C6 (Olfactory receptor, family 13, subfamily C, member 6 pseudogene) (Olfactory receptor, family 13, subfamily C, member 7 pseudogene) (Putative olfactory receptor 13C7)	OR13C6P	Homo sapiens (Human)	151
Q8NH61	O51F2_HUMAN	reviewed	Olfactory receptor 51F2 (Olfactory receptor OR11-23)	OR51F2	Homo sapiens (Human)	342
Q8NH63	O51H1_HUMAN	reviewed	Olfactory receptor 51H1 (Olfactory receptor OR11-25)	OR51H1 OR51H1P	Homo sapiens (Human)	302
Q9H342	O51J1_HUMAN	reviewed	Olfactory receptor 51J1 (Odorant receptor HOR5'beta8) (Olfactory receptor 51J2)	OR51J1 OR51J1P OR51J2	Homo sapiens (Human)	316
Q8NGJ9	O51T1_HUMAN	reviewed	Olfactory receptor 51T1 (Olfactory receptor OR11-26)	OR51T1	Homo sapiens (Human)	327
Q9H2C5	O52A5_HUMAN	reviewed	Olfactory receptor 52A5 (Odorant receptor HOR3'beta5) (Olfactory receptor OR11-33)	OR52A5	Homo sapiens (Human)	316
Q8NGJ3	O52E1_HUMAN	reviewed	Olfactory receptor 52E1	OR52E1 OR52E1P	Homo sapiens (Human)	308
Q8NGH9	O52E4_HUMAN	reviewed	Olfactory receptor 52E4 (Olfactory receptor OR11-55)	OR52E4	Homo sapiens (Human)	312
Q6IFG1	O52E8_HUMAN	reviewed	Olfactory receptor 52E8 (Olfactory receptor OR11-54)	OR52E8	Homo sapiens (Human)	317
Q8NH67	O52I2_HUMAN	reviewed	Olfactory receptor 52I2 (Olfactory receptor OR11-12)	OR52I2	Homo sapiens (Human)	350
Q8NGH6	O52L2_HUMAN	reviewed	Putative olfactory receptor 52L2 (Olfactory receptor OR11-74)	OR52L2P OR52L2	Homo sapiens (Human)	319
Q8NH56	O52N5_HUMAN	reviewed	Olfactory receptor 52N5 (Olfactory receptor OR11-62)	OR52N5	Homo sapiens (Human)	324
P0C646	O52Z1_HUMAN	reviewed	Olfactory receptor 52Z1	OR52Z1 OR52Z1P	Homo sapiens (Human)	297
Q8NH54	O56A3_HUMAN	reviewed	Olfactory receptor 56A3 (Olfactory receptor 56A6)	OR56A3 OR56A3P OR56A6	Homo sapiens (Human)	315
P0C7T3	O56A5_HUMAN	reviewed	Olfactory receptor 56A5	OR56A5 OR56A5P	Homo sapiens (Human)	313
Q8NH76	O56B4_HUMAN	reviewed	Olfactory receptor 56B4 (Olfactory receptor OR11-67)	OR56B4	Homo sapiens (Human)	319
Q9NZP5	O5AC2_HUMAN	reviewed	Olfactory receptor 5AC2 (HSA1)	OR5AC2	Homo sapiens (Human)	309
A6NM76	O6C76_HUMAN	reviewed	Olfactory receptor 6C76	OR6C76	Homo sapiens (Human)	312
O43749	OR1F1_HUMAN	reviewed	Olfactory receptor 1F1 (Olfactory receptor 16-35) (OR16-35) (Olfactory receptor 1F10) (Olfactory receptor 1F4) (Olfactory receptor 1F5) (Olfactory receptor 1F6) (Olfactory receptor 1F7) (Olfactory receptor 1F8) (Olfactory receptor 1F9) (Olfactory receptor OR16-4)	OR1F1 OLFMF OR1F10 OR1F4 OR1F5 OR1F6 OR1F7 OR1F8 OR1F9	Homo sapiens (Human)	312
O60431	OR1I1_HUMAN	reviewed	Olfactory receptor 1I1 (Olfactory receptor 19-20) (OR19-20)	OR1I1	Homo sapiens (Human)	355
Q8NGS2	OR1J2_HUMAN	reviewed	Olfactory receptor 1J2 (HSA5) (HTPCRX15) (OST044) (Olfactory receptor 1J3) (Olfactory receptor 1J5) (Olfactory receptor OR9-19)	OR1J2 OR1J3 OR1J5	Homo sapiens (Human)	313
Q8NH94	OR1L1_HUMAN	reviewed	Olfactory receptor 1L1 (Olfactory receptor 1L2) (Olfactory receptor 9-C) (OR9-C) (Olfactory receptor OR9-27)	OR1L1 OR1L2	Homo sapiens (Human)	360
Q8NH06	OR1P1_HUMAN	reviewed	Olfactory receptor 1P1 (Olfactory receptor 17-208) (OR17-208) (Olfactory receptor OR17-9)	OR1P1 OR1P1P	Homo sapiens (Human)	330
Q8NH92	OR1S1_HUMAN	reviewed	Olfactory receptor 1S1 (Olfactory receptor OR11-232)	OR1S1	Homo sapiens (Human)	325
Q96R45	OR2A7_HUMAN	reviewed	Olfactory receptor 2A7 (Olfactory receptor OR7-18)	OR2A7	Homo sapiens (Human)	310
P59922	OR2B8_HUMAN	reviewed	Putative olfactory receptor 2B8 (Hs6M1-29P)	OR2B8P OR2B8	Homo sapiens (Human)	312
Q8N628	OR2C3_HUMAN	reviewed	Olfactory receptor 2C3 (Olfactory receptor 2C4) (Olfactory receptor 2C5) (Olfactory receptor OR1-30)	OR2C3 OR2C4 OR2C5P	Homo sapiens (Human)	320
O95006	OR2F2_HUMAN	reviewed	Olfactory receptor 2F2 (Olfactory receptor 7-1) (OR7-1) (Olfactory receptor OR7-6)	OR2F2	Homo sapiens (Human)	317
Q9GZK4	OR2H1_HUMAN	reviewed	Olfactory receptor 2H1 (Hs6M1-16) (OLFR42A-9004.14/9026.2) (Olfactory receptor 2H6) (Olfactory receptor 2H8) (Olfactory receptor 6-2) (OR6-2) (Olfactory receptor OR6-32)	OR2H1 OR2H6 OR2H8	Homo sapiens (Human)	316
Q8NH16	OR2L2_HUMAN	reviewed	Olfactory receptor 2L2 (HTPCRH07) (Olfactory receptor 2L12) (Olfactory receptor 2L4)	OR2L2 OR2L12 OR2L4P	Homo sapiens (Human)	312
Q8NGN8	OR4A4_HUMAN	reviewed	Putative olfactory receptor 4A4 (Olfactory receptor OR11-107)	OR4A4P	Homo sapiens (Human)	299
Q8NGD4	OR4K1_HUMAN	reviewed	Olfactory receptor 4K1 (Olfactory receptor OR14-19)	OR4K1	Homo sapiens (Human)	311
Q8NGD5	OR4KE_HUMAN	reviewed	Olfactory receptor 4K14 (Olfactory receptor OR14-22)	OR4K14	Homo sapiens (Human)	310
Q8NH43	OR4L1_HUMAN	reviewed	Olfactory receptor 4L1 (Olfactory receptor 4L2) (Olfactory receptor OR14-28)	OR4L1 OR4L2P	Homo sapiens (Human)	312
Q8N0Y3	OR4N4_HUMAN	reviewed	Olfactory receptor 4N4 (Olfactory receptor OR15-1) (Olfactory receptor OR15-5)	OR4N4	Homo sapiens (Human)	316
Q8NGL7	OR4P4_HUMAN	reviewed	Olfactory receptor 4P4 (Olfactory receptor 4P3)	OR4P4 OR4P3P	Homo sapiens (Human)	312
Q8NH49	OR4X1_HUMAN	reviewed	Olfactory receptor 4X1 (Olfactory receptor OR11-104)	OR4X1	Homo sapiens (Human)	305
Q8NGJ0	OR5A1_HUMAN	reviewed	Olfactory receptor 5A1 (OST181) (Olfactory receptor OR11-249)	OR5A1 OR5A1P	Homo sapiens (Human)	315
Q8NGZ6	OR6F1_HUMAN	reviewed	Olfactory receptor 6F1 (Olfactory receptor OR1-38)	OR6F1	Homo sapiens (Human)	308
Q8NGW6	OR6K6_HUMAN	reviewed	Olfactory receptor 6K6 (Olfactory receptor OR1-21)	OR6K6	Homo sapiens (Human)	343
Q8NGY6	OR6N2_HUMAN	reviewed	Olfactory receptor 6N2 (Olfactory receptor OR1-23)	OR6N2	Homo sapiens (Human)	317
Q8NH40	OR6S1_HUMAN	reviewed	Olfactory receptor 6S1 (Olfactory receptor OR14-37)	OR6S1	Homo sapiens (Human)	331
Q8N148	OR6V1_HUMAN	reviewed	Olfactory receptor 6V1 (Olfactory receptor OR7-3)	OR6V1	Homo sapiens (Human)	313
Q8NGA2	OR7A2_HUMAN	reviewed	Putative olfactory receptor 7A2 (Putative olfactory receptor 7A7)	OR7A2P OR7A2 OR7A7	Homo sapiens (Human)	310
Q8NG95	OR7G3_HUMAN	reviewed	Olfactory receptor 7G3 (OST085) (Olfactory receptor OR19-9)	OR7G3	Homo sapiens (Human)	312
Q8NGQ1	OR9G4_HUMAN	reviewed	Olfactory receptor 9G4 (Olfactory receptor OR11-216)	OR9G4	Homo sapiens (Human)	327
Q8NGE7	OR9K2_HUMAN	reviewed	Olfactory receptor 9K2 (Olfactory receptor OR12-2)	OR9K2	Homo sapiens (Human)	335
Q8NGE9	OR9Q2_HUMAN	reviewed	Olfactory receptor 9Q2	OR9Q2 OR9Q2P	Homo sapiens (Human)	314
P41217	OX2G_HUMAN	reviewed	OX-2 membrane glycoprotein (CD antigen CD200)	CD200 MOX1 MOX2 My033	Homo sapiens (Human)	278
O43614	OX2R_HUMAN	reviewed	Orexin receptor type 2 (Ox-2-R) (Ox2-R) (Ox2R) (Hypocretin receptor type 2)	HCRTR2	Homo sapiens (Human)	444
Q15077	P2RY6_HUMAN	reviewed	P2Y purinoceptor 6 (P2Y6)	P2RY6 PP2891	Homo sapiens (Human)	328
O00750	P3C2B_HUMAN	reviewed	Phosphatidylinositol 4-phosphate 3-kinase C2 domain-containing subunit beta (PI3K-C2-beta) (PtdIns-3-kinase C2 subunit beta) (EC 2.7.1.154) (C2-PI3K) (Phosphoinositide 3-kinase-C2-beta)	PIK3C2B	Homo sapiens (Human)	1634
Q9H207	O10A5_HUMAN	reviewed	Olfactory receptor 10A5 (HP3) (Olfactory receptor 10A1) (Olfactory receptor 11-403) (OR11-403) (Olfactory receptor-like protein JCG6)	OR10A5 OR10A1	Homo sapiens (Human)	317
Q8NGX5	O10K1_HUMAN	reviewed	Olfactory receptor 10K1 (Olfactory receptor OR1-6)	OR10K1	Homo sapiens (Human)	313
Q8NGN2	O10S1_HUMAN	reviewed	Olfactory receptor 10S1 (Olfactory receptor OR11-279)	OR10S1	Homo sapiens (Human)	331
Q8NG94	O11H1_HUMAN	reviewed	Olfactory receptor 11H1 (Olfactory receptor OR22-1)	OR11H1	Homo sapiens (Human)	326
Q8NGR1	O13A1_HUMAN	reviewed	Olfactory receptor 13A1 (Olfactory receptor OR10-3)	OR13A1	Homo sapiens (Human)	328
Q8NGS5	O13C4_HUMAN	reviewed	Olfactory receptor 13C4 (Olfactory receptor OR9-7)	OR13C4	Homo sapiens (Human)	318
Q8NGS4	O13F1_HUMAN	reviewed	Olfactory receptor 13F1 (Olfactory receptor OR9-6)	OR13F1	Homo sapiens (Human)	319
Q8NGT2	O13J1_HUMAN	reviewed	Olfactory receptor 13J1 (Olfactory receptor OR9-2)	OR13J1	Homo sapiens (Human)	312
Q96R54	O14A2_HUMAN	reviewed	Olfactory receptor 14A2 (Olfactory receptor 5AX1) (Olfactory receptor OR1-31)	OR14A2 OR5AX1 OR5AX1P	Homo sapiens (Human)	314
A6ND48	O14I1_HUMAN	reviewed	Olfactory receptor 14I1 (Olfactory receptor 5BU1)	OR14I1 OR5BU1 OR5BU1P	Homo sapiens (Human)	311
Q8NHC6	O14L1_HUMAN	reviewed	Putative olfactory receptor 14L1 (Putative olfactory receptor 5AV1)	OR14L1P OR5AV1P	Homo sapiens (Human)	308
Q8NHA4	O2AE1_HUMAN	reviewed	Olfactory receptor 2AE1 (Olfactory receptor 2AE2)	OR2AE1 OR2AE2	Homo sapiens (Human)	323
A6NM03	O2AG2_HUMAN	reviewed	Olfactory receptor 2AG2	OR2AG2 OR2AG2P	Homo sapiens (Human)	316
Q8NGE2	O2AP1_HUMAN	reviewed	Olfactory receptor 2AP1 (Olfactory receptor OR12-9)	OR2AP1 OR2AP1P	Homo sapiens (Human)	309
Q8NH01	O2T11_HUMAN	reviewed	Olfactory receptor 2T11 (Olfactory receptor OR1-65)	OR2T11	Homo sapiens (Human)	316
Q8NG76	O2T33_HUMAN	reviewed	Olfactory receptor 2T33 (Olfactory receptor OR1-56)	OR2T33	Homo sapiens (Human)	320
Q8NGK1	O51G1_HUMAN	reviewed	Olfactory receptor 51G1 (Olfactory receptor 51G3) (Olfactory receptor OR11-29)	OR51G1 OR51G3P	Homo sapiens (Human)	321
Q9H343	O51I1_HUMAN	reviewed	Olfactory receptor 51I1 (Odorant receptor HOR5'beta11) (Olfactory receptor OR11-39)	OR51I1	Homo sapiens (Human)	314
Q9H341	O51M1_HUMAN	reviewed	Olfactory receptor 51M1 (Odorant receptor HOR5'beta7) (Olfactory receptor OR11-40)	OR51M1	Homo sapiens (Human)	326
Q8NGJ8	O51S1_HUMAN	reviewed	Olfactory receptor 51S1 (Olfactory receptor OR11-24)	OR51S1	Homo sapiens (Human)	323
[truncated: 1,101 more rows]

## Sheet: Signature_Gene_Overlap
Ensembl_ID	Gene_Symbol	Signature_Cell_Type
ENSG00000166825	ANPEP	Acinar
ENSG00000169347	GP2	Acinar
ENSG00000128271	ADORA2A	Alpha
ENSG00000164742	ADCY1	Alpha
ENSG00000043591	ADRB1	Alpha
ENSG00000140450	ARRDC4	Alpha
ENSG00000102181	CD99L2	Alpha
ENSG00000018236	CNTN1	Alpha
ENSG00000003989	SLC7A2	Alpha
ENSG00000197635	DPP4	Alpha
ENSG00000115594	IL1R1	Alpha
ENSG00000150093	ITGB1	Alpha
ENSG00000138193	PLCE1	Alpha
ENSG00000139209	SLC38A4	Alpha
ENSG00000078098	FAP	Alpha
ENSG00000101463	SYNDIG1	Alpha
ENSG00000006071	ABCC8	Beta
ENSG00000036828	CASR	Beta
ENSG00000145888	GLRA1	Beta
ENSG00000109971	HSPA8	Beta
ENSG00000140443	IGF1R	Beta
ENSG00000182759	MAFA	Beta
ENSG00000198739	LRRTM3	Beta
ENSG00000243444	PALM2	Beta
ENSG00000164756	SLC30A8	Beta
ENSG00000178568	ERBB4	Delta
ENSG00000121853	GHSR	Delta
ENSG00000116678	LEPR	Delta
ENSG00000111371	SLC38A1	Delta
ENSG00000153292	GPR110	Ductal
ENSG00000007306	CEACAM7	Ductal
ENSG00000001626	CFTR	Ductal
ENSG00000161921	CXCL16	Ductal
ENSG00000068078	FGFR3	Ductal
ENSG00000112414	GPR126	Ductal
ENSG00000019582	CD74	Ductal
ENSG00000118946	PCDH17	Ductal
ENSG00000170927	PKHD1	Ductal
ENSG00000007062	PROM1	Ductal
ENSG00000080493	SLC4A4	Ductal
ENSG00000092421	SEMA6A	Ductal
ENSG00000163235	TGFA	Ductal
ENSG00000163975	MFI2	Ductal
ENSG00000112299	VNN1	Ductal
ENSG00000112303	VNN2	Ductal
ENSG00000137261	KIAA0319	Gamma
ENSG00000005471	ABCB4	Gamma
ENSG00000122420	PTGFR	Gamma
ENSG00000108576	SLC6A4	Gamma
ENSG00000169604	ANTXR1	Stellate
ENSG00000176788	BASP1	Stellate
ENSG00000171444	MCC	Stellate
ENSG00000151617	EDNRA	Stellate
ENSG00000158292	GPR153	Stellate
ENSG00000183098	GPC6	Stellate
ENSG00000136235	GPNMB	Stellate
ENSG00000166033	HTRA1	Stellate
ENSG00000103742	IGDCC4	Stellate
ENSG00000125869	LAMP5	Stellate
ENSG00000123384	LRP1	Stellate
ENSG00000074181	NOTCH3	Stellate
ENSG00000182667	NTM	Stellate
ENSG00000181104	F2R	Stellate
ENSG00000189184	PCDH18	Stellate
ENSG00000113721	PDGFRB	Stellate
ENSG00000161381	PLXDC1	Stellate
ENSG00000004399	PLXND1	Stellate
ENSG00000078098	FAP	Stellate
ENSG00000170624	SGCD	Stellate
ENSG00000176170	SPHK1	Stellate
ENSG00000154096	THY1	Stellate
ENSG00000131634	TMEM204	Stellate
ENSG00000187688	TRPV2	Stellate
ENSG00000165633	VSTM4	Stellate

## Sheet: Average_log2_CPM
	Beta	Alpha	Delta	Gamma	Acinar	Ductal	Stellate	Bulk
ANPEP	0.0158925	0.00756514	0	0	5.1354	0.435698	0	5.48016
GP2	0.808427	0.738596	1.25029	1.02139	10.1006	0.853847	0.460828	7.94616
ADORA2A	0.019511	1.69584	0	0	0.628114	0.340777	0.426074	1.38543
ADCY1	2.94837	3.68397	2.24242	2.49403	2.23233	2.43388	2.11039	2.95102
ADRB1	0.0840671	1.94175	0	0	0	0	0	1.02513
ARRDC4	0.697524	3.99595	0.985495	0.573952	0.807129	0.71555	1.80148	1.54732
CD99L2	3.7633	5.88644	0.739154	1.94675	0.978099	0.309438	1.70285	4.5466
CNTN1	5.64962	6.77265	3.0498	3.55181	0.673266	0.161378	0.415182	3.56791
SLC7A2	6.28296	8.62125	6.09716	5.26261	5.054	0.88681	0.693049	4.61551
DPP4	0.157502	3.76462	0	0	0	1.30458	0.887823	2.50727
IL1R1	1.05749	2.35436	0.800677	1.15397	2.24104	3.96274	3.64226	1.93033
ITGB1	6.90269	8.6282	7.30092	7.64011	7.67734	10.2085	10.7224	6.01183
PLCE1	3.11216	6.64287	3.48131	3.53401	2.43506	3.34865	3.57906	4.96455
SLC38A4	1.49914	6.82591	4.29119	0.159474	1.1602	0.0918808	0	3.27394
FAP	0.189298	7.20125	0.727001	0.797566	0.545949	0.27933	8.61638	3.48429
SYNDIG1	0.00408273	1.62927	0	0	0	0	0	1.84007
ABCC8	9.63492	5.94729	7.26168	7.00637	0.945243	0.753386	0.62149	8.23312
CASR	6.35599	0.109869	4.56016	1.45697	0.267296	0.229399	0.0846245	4.69087
GLRA1	2.20586	0.0826333	0.104769	0.122203	0.0814209	0	0	1.85377
HSPA8	10.7694	9.26792	9.0876	8.8074	10.0796	9.31827	10.0726	9.54165
IGF1R	8.13332	5.6428	3.05979	4.95306	4.34294	3.2353	4.16945	5.23048
MAFA	2.42145	0.032938	0	0	0.0785203	0	0	2.00438
LRRTM3	2.85401	0	0	0.0616583	0	0	0	2.53158
PALM2	2.64147	1.17847	1.23581	0.999984	0.511243	0.814256	2.38579	1.81583
SLC30A8	10.8908	10.0026	8.3745	5.34711	1.71621	1.19915	0.484086	7.57001
ERBB4	0.027668	0.11866	4.24551	0.38064	0	0.245304	0	0.195875
GHSR	0	0	2.05667	0	0	0	0	1.68819
LEPR	0.753675	0.945395	7.54014	0.777939	1.51825	1.37696	0.655637	1.16848
SLC38A1	2.27632	2.21719	3.72037	2.10109	4.7213	3.86475	4.29521	3.09971
GPR110	2.25692	2.36476	3.33584	2.52638	1.4399	5.56364	2.71639	2.18186
CEACAM7	0	0	0	0	0.0314781	3.93687	0	4.08578
CFTR	0.101069	0.136707	0	0	0.0547632	7.77452	0	4.43695
CXCL16	1.56176	1.7493	2.1716	1.48592	2.26105	5.45447	1.46503	3.28023
FGFR3	0	0.0215588	0.101596	0	0	1.99083	0	0.256191
GPR126	0.114958	0	0	0	0	2.46448	0	0.547974
CD74	0.410734	1.76695	2.87789	1.13423	0.0901242	5.90667	0.50767	7.06448
PCDH17	4.6103	6.15766	4.89915	4.95624	0.0314781	2.17095	0.0835123	4.22714
PKHD1	0	0.0556091	0	0	0	2.57602	0.139721	0.896155
PROM1	0.0297105	0.0370859	0	0	0	4.00811	0	1.99244
SLC4A4	0.160864	0.169729	3.22743	2.80287	0.613624	7.72627	0.244456	2.3266
SEMA6A	1.89888	0.474054	2.6479	0.735956	0.267355	5.2944	0.562913	2.72031
TGFA	0.00829663	0.0163909	0	0	0.173366	3.18994	0	1.86685
MFI2	0.0933262	0.0483559	0.164461	0	0.0714086	2.25124	0	0.667135
VNN1	0.0141652	0.0761431	0.0475904	0	0.224364	4.73379	0	1.5187
VNN2	0	0.0089873	0	0	0	2.86206	0.0846245	1.3977
KIAA0319	1.43285	2.47993	0.934891	6.02568	0.751829	1.20786	0	2.13998
ABCB4	0.102594	0.121081	0.089291	1.95187	0	0	0	0.785501
PTGFR	0.0427566	0	0	2.08175	0	0	0	0.283766
SLC6A4	3.53922	4.33154	4.47634	7.38275	2.94567	4.00052	2.71981	3.89329
ANTXR1	0.886791	0.0231179	0	0	0.0965664	0.292982	6.10437	0.791633
BASP1	0	0.00534453	0	0	0	0	2.55552	0.281326
MCC	3.67834	1.81178	5.43444	0.799408	0.941331	1.78257	4.14487	2.7313
EDNRA	0.0267927	0.0238231	0	0	0	0	6.02749	0.382841
GPR153	0	0.0949895	0.461928	0	0	0	3.1771	0.420487
GPC6	0.0471179	2.10944	0.475827	1.08138	0	0	5.0882	1.95721
GPNMB	2.50284	1.95665	2.97505	1.91308	2.07703	2.50688	9.40698	4.06882
HTRA1	0.250584	0.672782	0.0794961	0.648952	0.219603	0.478199	3.55411	1.6865
IGDCC4	0.306059	0	0	0	0	0	3.24946	0.140422
LAMP5	0.00429529	0.0620706	0	0.568333	0	0	3.29273	2.05084
LRP1	0.868392	0.734583	0.525683	1.91974	0.25242	0.420634	4.92306	2.42867
NOTCH3	2.42002	2.23688	2.75928	2.31067	0.934471	2.6252	6.68862	2.5786
NTM	0.00451979	0	0.0820644	0.628655	0	0	4.34646	1.19964
F2R	3.25333	3.29687	4.22623	3.80572	2.67094	4.07157	6.96987	2.61756
PCDH18	0.00316717	0	0	0	0	0	3.45091	0.581711
PDGFRB	0.00289962	0	0	0	0.125144	0.152669	7.90103	2.21582
PLXDC1	0.757041	0.883361	0.829202	0.7533	0.479759	1.07228	5.68856	1.54027
PLXND1	0.665167	0.126711	0	0.941928	0.0715608	0	2.42342	1.02224
SGCD	0.453569	0.0830117	0	0	0.0358697	0.184849	4.21164	0.897076
SPHK1	0.270417	0.137884	0.231447	0.115115	0.105877	0.653438	3.9247	1.77486
THY1	0.0521124	0	0	0	0	0	5.55096	3.77529
TMEM204	0	0	0.442575	0	0	0	4.25607	0.628879
TRPV2	0.0233984	0.00444719	0	0	0	0	2.04222	1.46661
VSTM4	1.66089	1.60168	2.12637	1.64157	1.31306	2.15616	4.05175	1.17188
