# Supplementary material for: Single-cell transcriptomes identify human islet cell signatures and reveal cell-type–specific expression changes in type 2 diabetes
Source: Genome Res. 2017 Feb;27(2):208–22. doi: 10.1101/gr.212720.116 (PMC5287227; doi:10.1101/gr.212720.116)
Supplement: Supplemental Material [file supp_gr.212720.116_Supplemental_Table_S10.xlsx]

## Sheet: Reported_Beta_Genes_ANOVA
Supplemental_Table_S10: Examining the expression of alpha and beta specific reported genes reveals robust expression in both major and rare islet cell populations.
Table highlighting previously reported beta and alpha specific genes (from the Dorrell et al. 2011; Nica et al. 2013; Bramswig et al. 2013; and Blodgett et al. 2015 studies) that were confirmed to be enriched in the respective cell type after performing one-way analysis of variance (ANOVA) testing in conjunction with Tukey’s Honest Significant Difference (THSD) post-hoc analysis. The table also s…
Expression in Endocrine Cells	Number of Genes (out of 1683 genes)	Gene Symbol
Beta	115	TUBA1C, SCD, KIF5C, TMEM123, ENDOD1, RNF130, PLEKHM2, PTBP3, RAB3GAP1, SARS, AKAP2, TMX1, STT3A, NOL8, FOXN2, RMND5A, SRD5A1, ARID5B, HS6ST1, ARL6IP4, TMEM106B, DPP6, RASGEF1B, PIH1D1, TSHZ1, SURF2, SOCS2, DACH2, EIF3A, MAP1A, SLC18A2, ZNF770, PTEN, PSD3, ALDOC, C1orf116, AMZ2, ANKRD40, MTUS2, ANP32E, DOCK10, VLDLR, RGS16, WSCD2, ENO2, STX1A, GSN, SLC25A34, IAPP, UNC5D, RASGRF1, CNP, PPM1H, C1orf…
Alpha	4	IFI30, AGT, YIPF2, MTHFD2
Delta	24	HSD17B7, MAST4, NDRG4, DCX, SAMD3, KIAA0319L, SPAG16, BFAR, DDX55, SIPA1L1, FMN2, CD74, VAT1L, NT5DC2, PTPRM, ST6GAL1, FAM149A, SEC11C, FEM1B, AGPAT6, DNAH5, EIF1AD, WASF3, MCTP2
Gamma	22	ECE1, EEF2, PSMB5, RNF2, DYNC1I1, PDE3A, DUSP26, TXNRD1, TRPS1, HUS1, CXXC5, TUBB2A, ME1, ACSL1, PARD3, ZBTB20, CACNA1H, APOBEC2, RGS11, KIF3C, RBBP8, BTG3
Beta.Alpha	6	GRPEL1, MRPS10, PIAS1, TMEM167A, ROBO2, IGF1R
Beta.Delta	37	RGL1, DHRS7, TPPP3, PVRL3, NPTX2, CALD1, ZHX3, ASAP1, PARVB, SYT13, SORL1, TGFBR3, SIPA1L2, CASR, NISCH, TMEM150C, ANO5, TBC1D5, ANAPC16, TBC1D24, CADM1, C22orf42, WBP2, ITPR3, SPCS3, MCC, RBP4, PIPOX, PFKFB2, INS, ELAVL4, HSPH1, HADH, CYP2U1, ATP2A3, ENTPD3, HSPA13
Beta.Gamma	12	STAM, TAGLN3, FAM159B, SLC6A17, MYO1D, FXYD2, ADCYAP1, MEIS2, CLCN3, ELMO1, TRIM2, GLIS3
Alpha.Gamma	2	C10orf10, CKB
Gamma.Delta	2	SST, PARP4
Beta.Alpha.Delta	8	SLC30A8, TXLNA, KIAA0247, TSPYL5, KCNK16, PPP1R1A, RGPD8, PHACTR2
Beta.Alpha.Gamma	4	PAX6, EDIL3, KLHL42, G6PC2
Beta.Gamma.Delta	17	BHLHE41, PRSS23, TIMP2, ARHGEF3, PKIB, HDAC9, PRKACB, UCHL1, APOL2, BMP5, EFNA5, TMED6, PCSK1, GAD2, CABP7, ZMIZ1, SYNE2
Pan-Islet	124	NEBL, EDEM3, KIAA0226, C12orf23, TUBA1A, PPP1R2, PDE4DIP, ERLEC1, MLXIPL, ASB8, USE1, SEMA6B, TPD52, BBX, ALCAM, LAIR1, APLP2, COQ6, PFDN5, FLCN, CANX, ZNF483, CCDC90B, MESDC2, CC2D2A, HARS, KIF1A, NONO, TMOD1, FAM192A, TMEM45A, UBC, LARP1, MBNL1, MYH7B, CYP51A1, SERINC1, OCIAD2, CALR, HAP1, RPL36AL, COMMD9, RPS29, WDR62, LPIN1, DNAJC12, MORF4L2, GREB1, SHC1, RAB2A, CLTC, ZNF791, ERO1LB, DPYSL2, …
Lowly Expressed (Average Log2CPM < 2 across all islet cells)	964	SPAG6, C1QL1, TNNT2, CACNA1S, CCDC103, RGS1, PLA2G4A, PTGS2, ADAM11, FOXN4, RGS8, KIAA1614, ITGA2B, CCDC181, DUSP27, RXRG, FCRLB, HSPA6, MPZ, HDAC5, ITLN2, RBP5, SYT16, RPP38, CAMKV, PRKCH, AMIGO3, PTPN6, TMEM88, BAIAP2, NBPF24, TROAP, GJA8, RNF123, ACP6, PRPH, MST1, GNB3, MCOLN1, CCDC101, LAG3, FAM3D, ACOX2, ALPL, RLTPR, FAM181A, COX8C, DDN, DENND1C, AGRP, ZDHHC1, TCP11L2, KIF17, ACER1, BMPER, S…
< 4-fold change	342	FMNL1, CYB5R1, KIF18B, XPR1, SSH1, ISCU, TIPRL, FICD, TNK2, IP6K1, ITGAE, TP53, SAT2, FXR2, GTF3C1, CD68, ABHD10, NBPF9, IL12RB1, VWA5B1, FCHO1, CAPS, PAFAH1B1, CARD14, NOL3, FAM129C, ZBTB4, APPL2, HSD11B1L, HIPK1, TAF1D, RPN1, SLMAP, SEC61A1, LRRC48, HNMT, MEGF9, LENG8, GPS2, SMIM15, ME3, SLC39A7, TM9SF1, SLC2A4, MIOX, SREBF1, SF3A3, RASD1, PLXNB2, AAAS, FKBP15, PRPF18, AMPD2, CSF3R, RASA4, PAPL…

## Sheet: Beta_Reported_Genes
Gene_Symbol	Category_or_Study
SST	Dorrell-et-al-2011
CLIC6	Dorrell-et-al-2011
BM678403	Dorrell-et-al-2011
CB305813	Dorrell-et-al-2011
TFCP2L1	Dorrell-et-al-2011
ITIH5	Dorrell-et-al-2011
DGKB	Dorrell-et-al-2011
INS	Dorrell-et-al-2011
HADH	Dorrell-et-al-2011
SOD3	Dorrell-et-al-2011
HLA-DQB1	Dorrell-et-al-2011
C9orf135	Dorrell-et-al-2011
DLK1	Dorrell-et-al-2011
BX438895	Dorrell-et-al-2011
SSPN	Dorrell-et-al-2011
PTPRK	Dorrell-et-al-2011
ASB9	Dorrell-et-al-2011
DCX	Dorrell-et-al-2011
IAPP	Dorrell-et-al-2011
RBP4	Dorrell-et-al-2011
PTGS2	Dorrell-et-al-2011
SCD5	Dorrell-et-al-2011
DAPL1	Dorrell-et-al-2011
RGS16	Dorrell-et-al-2011
PLCH2	Dorrell-et-al-2011
BG818013	Dorrell-et-al-2011
LOC284033	Dorrell-et-al-2011
TNS1	Dorrell-et-al-2011
GLT25C2	Dorrell-et-al-2011
CALD1	Dorrell-et-al-2011
PRPH	Dorrell-et-al-2011
IL1B	Dorrell-et-al-2011
TSHZ2	Dorrell-et-al-2011
SGIP1	Dorrell-et-al-2011
ESR1	Dorrell-et-al-2011
CDH22	Dorrell-et-al-2011
IGF2	Dorrell-et-al-2011
ANTXR1	Dorrell-et-al-2011
THC2656690	Dorrell-et-al-2011
BC063022	Dorrell-et-al-2011
IGSF11	Dorrell-et-al-2011
SFRP1	Dorrell-et-al-2011
XYLT1	Dorrell-et-al-2011
ADCYAP1	Dorrell-et-al-2011
EPDR1	Dorrell-et-al-2011
FBN2	Dorrell-et-al-2011
PCDH7	Dorrell-et-al-2011
SLC17A6	Dorrell-et-al-2011
CNGA3	Dorrell-et-al-2011
BC104421	Dorrell-et-al-2011
CAPN13	Dorrell-et-al-2011
INS	Nica-et-al-2013
INS-IGF2	Nica-et-al-2013
IGF2	Nica-et-al-2013
SLC30A8	Nica-et-al-2013
G6PC2	Nica-et-al-2013
DLK1	Nica-et-al-2013
ERO1LB	Nica-et-al-2013
PCSK1	Nica-et-al-2013
NPTX2	Nica-et-al-2013
SCD	Nica-et-al-2013
VEGFA	Nica-et-al-2013
HADH	Nica-et-al-2013
EIF4A2	Nica-et-al-2013
TIMP2	Nica-et-al-2013
MEG3	Nica-et-al-2013
UCHL1	Nica-et-al-2013
SYT13	Nica-et-al-2013
PDX1	Nica-et-al-2013
ADCYAP1	Nica-et-al-2013
GAD2	Nica-et-al-2013
ALCAM	Nica-et-al-2013
NKX6-1	Nica-et-al-2013
GJD2	Nica-et-al-2013
TSC22D1	Nica-et-al-2013
CASR	Nica-et-al-2013
SLC6A6	Nica-et-al-2013
RP11-713B9.1	Nica-et-al-2013
BTG3	Nica-et-al-2013
CABP7	Nica-et-al-2013
SORL1	Nica-et-al-2013
CAPN13	Nica-et-al-2013
WSCD2	Nica-et-al-2013
RGS16	Nica-et-al-2013
TSPAN1	Nica-et-al-2013
ASB9	Nica-et-al-2013
GPM6A	Nica-et-al-2013
GLP1R	Nica-et-al-2013
BMP5	Nica-et-al-2013
P2RY1	Nica-et-al-2013
ENTPD3	Nica-et-al-2013
CYYR1	Nica-et-al-2013
VAT1L	Nica-et-al-2013
C8orf47	Nica-et-al-2013
SLC17A6	Nica-et-al-2013
O3FAR1	Nica-et-al-2013
SCD5	Nica-et-al-2013
OLFM1	Nica-et-al-2013
SLC35D3	Nica-et-al-2013
FAM115C	Nica-et-al-2013
TMEM150C	Nica-et-al-2013
NPTX2	Bramswig-et-al-2013
SPP1	Bramswig-et-al-2013
MAFA	Bramswig-et-al-2013
ADCYAP1	Bramswig-et-al-2013
RGS16	Bramswig-et-al-2013
HADH	Bramswig-et-al-2013
C10orf10	Bramswig-et-al-2013
TPPP3	Bramswig-et-al-2013
INS-IGF2	Bramswig-et-al-2013
ACPP	Bramswig-et-al-2013
CDKN1C	Bramswig-et-al-2013
RGS1	Bramswig-et-al-2013
PCSK1	Bramswig-et-al-2013
IAPP	Bramswig-et-al-2013
HIST1H4F	Bramswig-et-al-2013
THBD	Bramswig-et-al-2013
ASB9	Bramswig-et-al-2013
G6PC2	Bramswig-et-al-2013
FAM115C	Bramswig-et-al-2013
IGF2	Bramswig-et-al-2013
BMP5	Bramswig-et-al-2013
OMP	Bramswig-et-al-2013
PCDH7	Bramswig-et-al-2013
SYT16	Bramswig-et-al-2013
SLC2A2	Bramswig-et-al-2013
GSN	Bramswig-et-al-2013
TGFBR3	Bramswig-et-al-2013
INS	Bramswig-et-al-2013
PKIB	Bramswig-et-al-2013
WSCD2	Bramswig-et-al-2013
CABP7	Bramswig-et-al-2013
PRUNE2	Bramswig-et-al-2013
TUBB2B	Bramswig-et-al-2013
P2RY1	Bramswig-et-al-2013
GPM6A	Bramswig-et-al-2013
ASCL2	Bramswig-et-al-2013
OLFM1	Bramswig-et-al-2013
SLC6A6	Bramswig-et-al-2013
RASD1	Bramswig-et-al-2013
NKX6-1	Bramswig-et-al-2013
RPL3	Bramswig-et-al-2013
HIST3H2A	Bramswig-et-al-2013
PLCH2	Bramswig-et-al-2013
DGKB	Bramswig-et-al-2013
UCHL1	Bramswig-et-al-2013
IFLTD1	Bramswig-et-al-2013
GJD2	Bramswig-et-al-2013
SAMD11	Bramswig-et-al-2013
GEM	Bramswig-et-al-2013
SLC17A6	Bramswig-et-al-2013
HLA-DRA	Bramswig-et-al-2013
CASR	Bramswig-et-al-2013
SCD5	Bramswig-et-al-2013
GPNMB	Bramswig-et-al-2013
VAT1L	Bramswig-et-al-2013
FGL2	Bramswig-et-al-2013
PFKFB2	Bramswig-et-al-2013
GREM1	Bramswig-et-al-2013
C1QA	Bramswig-et-al-2013
TPSD1	Bramswig-et-al-2013
C9orf135	Bramswig-et-al-2013
PPM1E	Bramswig-et-al-2013
ERO1LB	Bramswig-et-al-2013
SYT13	Bramswig-et-al-2013
CYP2U1	Bramswig-et-al-2013
PVRL3	Bramswig-et-al-2013
RBP4	Bramswig-et-al-2013
TRPM3	Bramswig-et-al-2013
TGFBI	Bramswig-et-al-2013
ARG2	Bramswig-et-al-2013
IL11	Bramswig-et-al-2013
NR0B1	Bramswig-et-al-2013
ENTPD3	Bramswig-et-al-2013
HDAC9	Bramswig-et-al-2013
UNC5D	Bramswig-et-al-2013
HLA-DRB5	Bramswig-et-al-2013
CYBB	Bramswig-et-al-2013
SST	Bramswig-et-al-2013
OPRD1	Bramswig-et-al-2013
CLEC7A	Bramswig-et-al-2013
NDRG4	Bramswig-et-al-2013
DLK1	Bramswig-et-al-2013
ACP5	Bramswig-et-al-2013
HLA-DRB1	Bramswig-et-al-2013
SOCS2	Bramswig-et-al-2013
SORL1	Bramswig-et-al-2013
EDN3	Bramswig-et-al-2013
LRFN2	Bramswig-et-al-2013
HLA-DPA1	Bramswig-et-al-2013
ECEL1	Bramswig-et-al-2013
HIST3H2BB	Bramswig-et-al-2013
SLC2A13	Bramswig-et-al-2013
PTGS2	Bramswig-et-al-2013
IGSF11	Bramswig-et-al-2013
MORN5	Bramswig-et-al-2013
SDS	Bramswig-et-al-2013
TNNI2	Bramswig-et-al-2013
GPR177	Bramswig-et-al-2013
C8orf47	Bramswig-et-al-2013
LRRTM3	Bramswig-et-al-2013
FPR3	Bramswig-et-al-2013
KCNQ2	Bramswig-et-al-2013
C1QB	Bramswig-et-al-2013
VEGFA	Bramswig-et-al-2013
DOCK10	Bramswig-et-al-2013
LAPTM5	Bramswig-et-al-2013
DACH2	Bramswig-et-al-2013
STX1A	Bramswig-et-al-2013
SLC8A1	Bramswig-et-al-2013
TBC1D4	Bramswig-et-al-2013
SPAG6	Bramswig-et-al-2013
TIMP2	Bramswig-et-al-2013
ZMAT5	Bramswig-et-al-2013
C1orf189	Bramswig-et-al-2013
CYYR1	Bramswig-et-al-2013
NTNG2	Bramswig-et-al-2013
SLC6A17	Bramswig-et-al-2013
MNX1	Bramswig-et-al-2013
CAPN13	Bramswig-et-al-2013
ATP2A3	Bramswig-et-al-2013
SIPA1L2	Bramswig-et-al-2013
CHST2	Bramswig-et-al-2013
IER3	Bramswig-et-al-2013
HES3	Bramswig-et-al-2013
BPIL2	Bramswig-et-al-2013
HLA-DMB	Bramswig-et-al-2013
DEFB116	Bramswig-et-al-2013
TSPAN1	Bramswig-et-al-2013
CHL1	Bramswig-et-al-2013
RGPD5	Bramswig-et-al-2013
RGPD6	Bramswig-et-al-2013
CADM1	Bramswig-et-al-2013
ROBO1	Bramswig-et-al-2013
HIST1H3F	Bramswig-et-al-2013
ANO5	Bramswig-et-al-2013
SRD5A1	Bramswig-et-al-2013
AKAP2	Bramswig-et-al-2013
KCNG3	Bramswig-et-al-2013
TUBA1A	Bramswig-et-al-2013
HAVCR2	Bramswig-et-al-2013
CNGA3	Bramswig-et-al-2013
SRGN	Bramswig-et-al-2013
LCN6	Bramswig-et-al-2013
RASGEF1B	Bramswig-et-al-2013
ESR1	Bramswig-et-al-2013
S100A4	Bramswig-et-al-2013
CAPS	Bramswig-et-al-2013
SEPW1	Bramswig-et-al-2013
RGL1	Bramswig-et-al-2013
CHST8	Bramswig-et-al-2013
APOE	Bramswig-et-al-2013
ENDOD1	Bramswig-et-al-2013
MEIS2	Bramswig-et-al-2013
C1QL1	Bramswig-et-al-2013
SLC45A3	Bramswig-et-al-2013
LYZ	Bramswig-et-al-2013
LSP1	Bramswig-et-al-2013
GAD2	Bramswig-et-al-2013
NPY	Bramswig-et-al-2013
SLC16A3	Bramswig-et-al-2013
C17orf82	Bramswig-et-al-2013
NKX6-3	Bramswig-et-al-2013
PALM2-AKAP2	Bramswig-et-al-2013
GRIA4	Bramswig-et-al-2013
PLCL2	Bramswig-et-al-2013
ABHD10	Bramswig-et-al-2013
ELMO1	Bramswig-et-al-2013
MCTP2	Bramswig-et-al-2013
TAGLN3	Bramswig-et-al-2013
SYNE2	Bramswig-et-al-2013
KCNK16	Bramswig-et-al-2013
CYGB	Bramswig-et-al-2013
RGPD8	Bramswig-et-al-2013
ASAP1	Bramswig-et-al-2013
SLC2A1	Bramswig-et-al-2013
FATE1	Bramswig-et-al-2013
INSM1	Bramswig-et-al-2013
FAM159B	Bramswig-et-al-2013
TPSB2	Bramswig-et-al-2013
KCNJ16	Bramswig-et-al-2013
SLCO5A1	Bramswig-et-al-2013
ALDOC	Bramswig-et-al-2013
ALCAM	Bramswig-et-al-2013
TMOD1	Bramswig-et-al-2013
IL28B	Bramswig-et-al-2013
RXRG	Bramswig-et-al-2013
GLP1R	Bramswig-et-al-2013
PPP1R1A	Bramswig-et-al-2013
MSR1	Bramswig-et-al-2013
GAD1	Bramswig-et-al-2013
TMEM37	Bramswig-et-al-2013
SNCB	Bramswig-et-al-2013
RASGRF2	Bramswig-et-al-2013
DNAJB9	Bramswig-et-al-2013
PLA2G4A	Bramswig-et-al-2013
MPP1	Bramswig-et-al-2013
TIFAB	Bramswig-et-al-2013
PLA2G7	Bramswig-et-al-2013
TNFRSF11A	Bramswig-et-al-2013
NXF5	Bramswig-et-al-2013
DKK4	Bramswig-et-al-2013
KRTAP19-8	Bramswig-et-al-2013
PDE3A	Bramswig-et-al-2013
SLC18A2	Bramswig-et-al-2013
C18orf1	Bramswig-et-al-2013
HSPA13	Bramswig-et-al-2013
ATRNL1	Bramswig-et-al-2013
SCD	Bramswig-et-al-2013
HIST1H1B	Bramswig-et-al-2013
MRGPRG	Bramswig-et-al-2013
IFI30	Bramswig-et-al-2013
SLC35D3	Bramswig-et-al-2013
PRSS23	Bramswig-et-al-2013
MSLN	Bramswig-et-al-2013
RLN3	Bramswig-et-al-2013
MEIS3	Bramswig-et-al-2013
OXT	Bramswig-et-al-2013
CTAG2	Bramswig-et-al-2013
RRAGD	Bramswig-et-al-2013
ITGB2	Bramswig-et-al-2013
HPX	Bramswig-et-al-2013
TPPP	Bramswig-et-al-2013
ACSL1	Bramswig-et-al-2013
TPD52	Bramswig-et-al-2013
AMPD2	Bramswig-et-al-2013
SPEM1	Bramswig-et-al-2013
SUSD4	Bramswig-et-al-2013
PLCB4	Bramswig-et-al-2013
CAMKK1	Bramswig-et-al-2013
ABHD3	Bramswig-et-al-2013
SLC7A10	Bramswig-et-al-2013
DYNC1I1	Bramswig-et-al-2013
RAPH1	Bramswig-et-al-2013
KIAA2022	Bramswig-et-al-2013
FICD	Bramswig-et-al-2013
DNAJC12	Bramswig-et-al-2013
TNNT3	Bramswig-et-al-2013
KLHDC5	Bramswig-et-al-2013
C1QC	Bramswig-et-al-2013
KCNJ11	Bramswig-et-al-2013
ARL4D	Bramswig-et-al-2013
TPT1	Bramswig-et-al-2013
SAMD3	Bramswig-et-al-2013
MTUS2	Bramswig-et-al-2013
VWDE	Bramswig-et-al-2013
SEPT5	Bramswig-et-al-2013
BEND6	Bramswig-et-al-2013
STAB1	Bramswig-et-al-2013
CETN1	Bramswig-et-al-2013
HAGHL	Bramswig-et-al-2013
C22orf42	Bramswig-et-al-2013
ENO2	Bramswig-et-al-2013
HHATL	Bramswig-et-al-2013
CD53	Bramswig-et-al-2013
EEF1A2	Bramswig-et-al-2013
CLEC18B	Bramswig-et-al-2013
CDK5R1	Bramswig-et-al-2013
ABCC8	Bramswig-et-al-2013
OBP2B	Bramswig-et-al-2013
MYO3A	Bramswig-et-al-2013
SCG3	Bramswig-et-al-2013
RPS6	Bramswig-et-al-2013
TMEM150C	Bramswig-et-al-2013
DUSP26	Bramswig-et-al-2013
NBEA	Bramswig-et-al-2013
DENND2A	Bramswig-et-al-2013
FAM183A	Bramswig-et-al-2013
KATNAL1	Bramswig-et-al-2013
ST8SIA4	Bramswig-et-al-2013
CTNNA2	Bramswig-et-al-2013
ABR	Bramswig-et-al-2013
KLHL1	Bramswig-et-al-2013
MAP1B	Bramswig-et-al-2013
SPEG	Bramswig-et-al-2013
ASCL1	Bramswig-et-al-2013
NKX2-2	Bramswig-et-al-2013
HSPB6	Bramswig-et-al-2013
CPE	Bramswig-et-al-2013
CACNA2D1	Bramswig-et-al-2013
MYT1L	Bramswig-et-al-2013
C2CD4A	Bramswig-et-al-2013
HYOU1	Bramswig-et-al-2013
LAIR1	Bramswig-et-al-2013
CNTN5	Bramswig-et-al-2013
SLC5A4	Bramswig-et-al-2013
IGFL2	Bramswig-et-al-2013
KCNK9	Bramswig-et-al-2013
NXF2	Bramswig-et-al-2013
AIRE	Bramswig-et-al-2013
PPP2R2C	Bramswig-et-al-2013
PPM1L	Bramswig-et-al-2013
MYL7	Bramswig-et-al-2013
C15orf59	Bramswig-et-al-2013
BEST3	Bramswig-et-al-2013
HSF4	Bramswig-et-al-2013
ODF3B	Bramswig-et-al-2013
COX8C	Bramswig-et-al-2013
SCN1B	Bramswig-et-al-2013
FXYD2	Bramswig-et-al-2013
ANKRD23	Bramswig-et-al-2013
TMEM45A	Bramswig-et-al-2013
ROBO2	Bramswig-et-al-2013
CDH18	Bramswig-et-al-2013
KIAA1107	Bramswig-et-al-2013
SLC25A34	Bramswig-et-al-2013
AGT	Bramswig-et-al-2013
TMCC2	Bramswig-et-al-2013
GNAS	Bramswig-et-al-2013
PRKACB	Bramswig-et-al-2013
NAP1L5	Bramswig-et-al-2013
CC2D2A	Bramswig-et-al-2013
TNFRSF25	Bramswig-et-al-2013
RPS4X	Bramswig-et-al-2013
MT3	Bramswig-et-al-2013
LCE3C	Bramswig-et-al-2013
FAM134B	Bramswig-et-al-2013
SLC27A6	Bramswig-et-al-2013
KCNF1	Bramswig-et-al-2013
FAM102A	Bramswig-et-al-2013
FFAR1	Bramswig-et-al-2013
TMEM200A	Bramswig-et-al-2013
TRIB3	Bramswig-et-al-2013
MXRA7	Bramswig-et-al-2013
PLCXD3	Bramswig-et-al-2013
TMEM150B	Bramswig-et-al-2013
SEMA6B	Bramswig-et-al-2013
COL11A2	Bramswig-et-al-2013
TPSG1	Bramswig-et-al-2013
MEX3B	Bramswig-et-al-2013
FMN2	Bramswig-et-al-2013
PRG3	Bramswig-et-al-2013
HLA-DPB1	Bramswig-et-al-2013
MCF2L2	Bramswig-et-al-2013
C6orf115	Bramswig-et-al-2013
CDKN2D	Bramswig-et-al-2013
LRRC10B	Bramswig-et-al-2013
FAM105A	Bramswig-et-al-2013
LMO2	Bramswig-et-al-2013
SSTR5	Bramswig-et-al-2013
PCSK9	Bramswig-et-al-2013
KIRREL3	Bramswig-et-al-2013
CD74	Bramswig-et-al-2013
HLA-DQB1	Bramswig-et-al-2013
PTCH2	Bramswig-et-al-2013
MAN1C1	Bramswig-et-al-2013
TRIM2	Bramswig-et-al-2013
CTSS	Bramswig-et-al-2013
COL9A3	Bramswig-et-al-2013
ADRA2A	Bramswig-et-al-2013
MSI2	Bramswig-et-al-2013
HSD17B7	Bramswig-et-al-2013
TYROBP	Bramswig-et-al-2013
SERINC1	Bramswig-et-al-2013
IL1F7	Bramswig-et-al-2013
KBTBD5	Bramswig-et-al-2013
PPM1H	Bramswig-et-al-2013
C16orf92	Bramswig-et-al-2013
CEND1	Bramswig-et-al-2013
KCNK4	Bramswig-et-al-2013
KRTAP12-3	Bramswig-et-al-2013
SYT4	Bramswig-et-al-2013
OLFM2	Bramswig-et-al-2013
MCC	Bramswig-et-al-2013
VSIG4	Bramswig-et-al-2013
MYL5	Bramswig-et-al-2013
C6orf173	Bramswig-et-al-2013
RAB31	Bramswig-et-al-2013
FIGLA	Bramswig-et-al-2013
SREBF1	Bramswig-et-al-2013
BNIP3L	Bramswig-et-al-2013
C5orf38	Bramswig-et-al-2013
FOXC2	Bramswig-et-al-2013
DEFB4	Bramswig-et-al-2013
NTN1	Bramswig-et-al-2013
NEFM	Bramswig-et-al-2013
LCN10	Bramswig-et-al-2013
DAPL1	Bramswig-et-al-2013
ELAVL4	Bramswig-et-al-2013
GSTM5	Bramswig-et-al-2013
NR3C1	Bramswig-et-al-2013
GPRIN1	Bramswig-et-al-2013
SPAG16	Bramswig-et-al-2013
DNAJA4	Bramswig-et-al-2013
CMTM5	Bramswig-et-al-2013
ARID5B	Bramswig-et-al-2013
SIX2	Bramswig-et-al-2013
KLHDC8A	Bramswig-et-al-2013
EDIL3	Bramswig-et-al-2013
RPL37A	Bramswig-et-al-2013
UTS2	Bramswig-et-al-2013
CNRIP1	Bramswig-et-al-2013
C3orf18	Bramswig-et-al-2013
CLDN9	Bramswig-et-al-2013
CHRND	Bramswig-et-al-2013
RPH3AL	Bramswig-et-al-2013
RPS29	Bramswig-et-al-2013
ADAMTS2	Bramswig-et-al-2013
KCNH2	Bramswig-et-al-2013
IQCF2	Bramswig-et-al-2013
ABCG1	Bramswig-et-al-2013
NT5DC2	Bramswig-et-al-2013
HS6ST1	Bramswig-et-al-2013
SLC25A29	Bramswig-et-al-2013
ALOX5	Bramswig-et-al-2013
UBTD1	Bramswig-et-al-2013
CALR	Bramswig-et-al-2013
FASN	Bramswig-et-al-2013
GLIS3	Bramswig-et-al-2013
RASGRF1	Bramswig-et-al-2013
CLCNKA	Bramswig-et-al-2013
PRICKLE4	Bramswig-et-al-2013
CLGN	Bramswig-et-al-2013
TMEM27	Bramswig-et-al-2013
DYNLRB2	Bramswig-et-al-2013
KCNK17	Bramswig-et-al-2013
OTOS	Bramswig-et-al-2013
NAT6	Bramswig-et-al-2013
RAB12	Bramswig-et-al-2013
TMEM107	Bramswig-et-al-2013
NDUFA4L2	Bramswig-et-al-2013
TNFRSF14	Bramswig-et-al-2013
KCNIP2	Bramswig-et-al-2013
PEPD	Bramswig-et-al-2013
DNAH5	Bramswig-et-al-2013
KRTAP13-3	Bramswig-et-al-2013
KLK13	Bramswig-et-al-2013
SPTB	Bramswig-et-al-2013
C19orf26	Bramswig-et-al-2013
TEKT1	Bramswig-et-al-2013
ACCN3	Bramswig-et-al-2013
ANKRD39	Bramswig-et-al-2013
SPDYC	Bramswig-et-al-2013
CCDC159	Bramswig-et-al-2013
DOLPP1	Bramswig-et-al-2013
SAA1	Bramswig-et-al-2013
SEC11C	Bramswig-et-al-2013
KIAA1644	Bramswig-et-al-2013
CENPM	Bramswig-et-al-2013
UBXN10	Bramswig-et-al-2013
CD72	Bramswig-et-al-2013
GNB3	Bramswig-et-al-2013
GDPD3	Bramswig-et-al-2013
CTSW	Bramswig-et-al-2013
ZIM2	Bramswig-et-al-2013
SLC30A8	Bramswig-et-al-2013
SCGB1C1	Bramswig-et-al-2013
COL20A1	Bramswig-et-al-2013
SVIP	Bramswig-et-al-2013
CACNA1H	Bramswig-et-al-2013
IGLL1	Bramswig-et-al-2013
GPR56	Bramswig-et-al-2013
RHBDL1	Bramswig-et-al-2013
RNF187	Bramswig-et-al-2013
ADAMTSL4	Bramswig-et-al-2013
DRD2	Bramswig-et-al-2013
AMDHD2	Bramswig-et-al-2013
RAB3IL1	Bramswig-et-al-2013
SLC22A8	Bramswig-et-al-2013
PRB2	Bramswig-et-al-2013
KRT28	Bramswig-et-al-2013
CARD14	Bramswig-et-al-2013
ESPN	Bramswig-et-al-2013
VSIG2	Bramswig-et-al-2013
GNG8	Bramswig-et-al-2013
SEPT1	Bramswig-et-al-2013
USE1	Bramswig-et-al-2013
MUTED	Bramswig-et-al-2013
KIF18B	Bramswig-et-al-2013
CAPN11	Bramswig-et-al-2013
AGTPBP1	Bramswig-et-al-2013
PLXND1	Bramswig-et-al-2013
CGREF1	Bramswig-et-al-2013
ATG9B	Bramswig-et-al-2013
JPH4	Bramswig-et-al-2013
CYP51A1	Bramswig-et-al-2013
MUPCDH	Bramswig-et-al-2013
CSF1R	Bramswig-et-al-2013
MAP1LC3A	Bramswig-et-al-2013
PRSS27	Bramswig-et-al-2013
SUSD2	Bramswig-et-al-2013
ISLR	Bramswig-et-al-2013
TBC1D17	Bramswig-et-al-2013
COL5A1	Bramswig-et-al-2013
ZC3H10	Bramswig-et-al-2013
MYH7B	Bramswig-et-al-2013
TFEB	Bramswig-et-al-2013
NPFF	Bramswig-et-al-2013
ANKRD33	Bramswig-et-al-2013
ITGAD	Bramswig-et-al-2013
APOL2	Bramswig-et-al-2013
PLEKHM2	Bramswig-et-al-2013
MAST1	Bramswig-et-al-2013
ACOX2	Bramswig-et-al-2013
PFKFB4	Bramswig-et-al-2013
PRCD	Bramswig-et-al-2013
LHX2	Bramswig-et-al-2013
ADC	Bramswig-et-al-2013
SLC22A18AS	Bramswig-et-al-2013
KLHL17	Bramswig-et-al-2013
TTYH1	Bramswig-et-al-2013
ZNF25	Bramswig-et-al-2013
SYNGR3	Bramswig-et-al-2013
KLHL30	Bramswig-et-al-2013
MSI1	Bramswig-et-al-2013
CNKSR1	Bramswig-et-al-2013
IL2RB	Bramswig-et-al-2013
OLT-2	Bramswig-et-al-2013
C1orf86	Bramswig-et-al-2013
PDX1	Bramswig-et-al-2013
EMID1	Bramswig-et-al-2013
FAM181B	Bramswig-et-al-2013
C17orf64	Bramswig-et-al-2013
FCHO1	Bramswig-et-al-2013
BMPER	Bramswig-et-al-2013
TGM5	Bramswig-et-al-2013
SAT2	Bramswig-et-al-2013
NANOS3	Bramswig-et-al-2013
SLC9A3R2	Bramswig-et-al-2013
NCOR2	Bramswig-et-al-2013
RORC	Bramswig-et-al-2013
SPDEF	Bramswig-et-al-2013
SGIP1	Bramswig-et-al-2013
DHRS7C	Bramswig-et-al-2013
GALK2	Bramswig-et-al-2013
NCKAP1L	Bramswig-et-al-2013
CYB5R1	Bramswig-et-al-2013
SERPINE3	Bramswig-et-al-2013
ACVRL1	Bramswig-et-al-2013
LILRA4	Bramswig-et-al-2013
PIK3IP1	Bramswig-et-al-2013
FBF1	Bramswig-et-al-2013
KCNH3	Bramswig-et-al-2013
CLEC4C	Bramswig-et-al-2013
GIYD1	Bramswig-et-al-2013
GIYD2	Bramswig-et-al-2013
ARHGEF15	Bramswig-et-al-2013
LRTM2	Bramswig-et-al-2013
SULF1	Bramswig-et-al-2013
SSPO	Bramswig-et-al-2013
ANKRD13B	Bramswig-et-al-2013
MANF	Bramswig-et-al-2013
GGT5	Bramswig-et-al-2013
LBP	Bramswig-et-al-2013
PTCRA	Bramswig-et-al-2013
SH2D2A	Bramswig-et-al-2013
TBX4	Bramswig-et-al-2013
SPANXD	Bramswig-et-al-2013
PACSIN1	Bramswig-et-al-2013
RLTPR	Bramswig-et-al-2013
CDX1	Bramswig-et-al-2013
LIMD2	Bramswig-et-al-2013
PPP1R12C	Bramswig-et-al-2013
CHST12	Bramswig-et-al-2013
KIF26B	Bramswig-et-al-2013
SRPK3	Bramswig-et-al-2013
CCL14	Bramswig-et-al-2013
TUBB2C	Bramswig-et-al-2013
FBXW9	Bramswig-et-al-2013
IL1F6	Bramswig-et-al-2013
PDK2	Bramswig-et-al-2013
ANKK1	Bramswig-et-al-2013
FGF19	Bramswig-et-al-2013
NOXA1	Bramswig-et-al-2013
TNFSF12-TNFSF13	Bramswig-et-al-2013
FTCD	Bramswig-et-al-2013
P2RY6	Bramswig-et-al-2013
REN	Bramswig-et-al-2013
NOS3	Bramswig-et-al-2013
RGL2	Bramswig-et-al-2013
C6orf64	Bramswig-et-al-2013
C21orf29	Bramswig-et-al-2013
C1orf116	Bramswig-et-al-2013
SLC22A13	Bramswig-et-al-2013
HSPA6	Bramswig-et-al-2013
ZC3H12D	Bramswig-et-al-2013
PFKL	Bramswig-et-al-2013
TH	Bramswig-et-al-2013
CD8B	Bramswig-et-al-2013
RNF2	Bramswig-et-al-2013
SEMA3F	Bramswig-et-al-2013
CLRN2	Bramswig-et-al-2013
XRCC1	Bramswig-et-al-2013
DPM2	Bramswig-et-al-2013
CDC27	Bramswig-et-al-2013
PTCHD2	Bramswig-et-al-2013
AIFM3	Bramswig-et-al-2013
LDLRAD2	Bramswig-et-al-2013
MYH6	Bramswig-et-al-2013
IRS2	Bramswig-et-al-2013
ACSF2	Bramswig-et-al-2013
HIST2H2AC	Bramswig-et-al-2013
CPNE6	Bramswig-et-al-2013
ITGA2B	Bramswig-et-al-2013
GATA5	Bramswig-et-al-2013
NCKAP5L	Bramswig-et-al-2013
CDH16	Bramswig-et-al-2013
ITPR3	Bramswig-et-al-2013
TSHZ3	Bramswig-et-al-2013
SH2D7	Bramswig-et-al-2013
UBL3	Bramswig-et-al-2013
F7	Bramswig-et-al-2013
PCP2	Bramswig-et-al-2013
BLK	Bramswig-et-al-2013
GJB4	Bramswig-et-al-2013
PAN2	Bramswig-et-al-2013
GIMAP5	Bramswig-et-al-2013
PMFBP1	Bramswig-et-al-2013
WNT9B	Bramswig-et-al-2013
DUSP27	Bramswig-et-al-2013
XDH	Bramswig-et-al-2013
ZP3	Bramswig-et-al-2013
ARID3A	Bramswig-et-al-2013
OGFOD2	Bramswig-et-al-2013
CBX8	Bramswig-et-al-2013
PTPN6	Bramswig-et-al-2013
CYTH4	Bramswig-et-al-2013
FAM190A	Bramswig-et-al-2013
C16orf86	Bramswig-et-al-2013
PGLYRP3	Bramswig-et-al-2013
PAFAH1B2	Bramswig-et-al-2013
TRMT11	Bramswig-et-al-2013
SPOCD1	Bramswig-et-al-2013
ING2	Bramswig-et-al-2013
S100A9	Bramswig-et-al-2013
TOM1	Bramswig-et-al-2013
LY6E	Bramswig-et-al-2013
ADAD2	Bramswig-et-al-2013
DCST2	Bramswig-et-al-2013
HLA-DMA	Bramswig-et-al-2013
CYP26B1	Bramswig-et-al-2013
SLC22A14	Bramswig-et-al-2013
GLT25D2	Bramswig-et-al-2013
FAM83C	Bramswig-et-al-2013
SPRYD3	Bramswig-et-al-2013
TMPRSS6	Bramswig-et-al-2013
HSPB7	Bramswig-et-al-2013
LOC729991-MEF2B	Bramswig-et-al-2013
TUSC5	Bramswig-et-al-2013
FAM131B	Bramswig-et-al-2013
KIF17	Bramswig-et-al-2013
TXNRD2	Bramswig-et-al-2013
C9orf171	Bramswig-et-al-2013
DOM3Z	Bramswig-et-al-2013
TSTD2	Bramswig-et-al-2013
ITGB1BP3	Bramswig-et-al-2013
SLC30A3	Bramswig-et-al-2013
ITIH1	Bramswig-et-al-2013
IL5RA	Bramswig-et-al-2013
DST	Bramswig-et-al-2013
PTEN	Bramswig-et-al-2013
KLHL29	Bramswig-et-al-2013
LRP1	Bramswig-et-al-2013
FANCF	Bramswig-et-al-2013
NRGN	Bramswig-et-al-2013
SLC37A2	Bramswig-et-al-2013
LRRN2	Bramswig-et-al-2013
PRKCA	Bramswig-et-al-2013
FN3K	Bramswig-et-al-2013
MPZ	Bramswig-et-al-2013
HAO1	Bramswig-et-al-2013
ICAM4	Bramswig-et-al-2013
GMPPA	Bramswig-et-al-2013
ACP6	Bramswig-et-al-2013
TPM2	Bramswig-et-al-2013
NPPA	Bramswig-et-al-2013
C16orf79	Bramswig-et-al-2013
COMP	Bramswig-et-al-2013
NUAK1	Bramswig-et-al-2013
C1orf113	Bramswig-et-al-2013
CLCN3	Bramswig-et-al-2013
SOBP	Bramswig-et-al-2013
ACER1	Bramswig-et-al-2013
GJA8	Bramswig-et-al-2013
KRT35	Bramswig-et-al-2013
MFAP2	Bramswig-et-al-2013
RHOBTB3	Bramswig-et-al-2013
SLC4A11	Bramswig-et-al-2013
ADAM8	Bramswig-et-al-2013
MYBPC3	Bramswig-et-al-2013
COL7A1	Bramswig-et-al-2013
SLCO2A1	Bramswig-et-al-2013
RBP5	Bramswig-et-al-2013
ITGAX	Bramswig-et-al-2013
AMIGO3	Bramswig-et-al-2013
SEC22B	Bramswig-et-al-2013
RIMKLA	Bramswig-et-al-2013
PDE2A	Bramswig-et-al-2013
SPIRE1	Bramswig-et-al-2013
TMEM167A	Bramswig-et-al-2013
TNFSF12	Bramswig-et-al-2013
PANK4	Bramswig-et-al-2013
ZNF791	Bramswig-et-al-2013
ADAMTS14	Bramswig-et-al-2013
JOSD2	Bramswig-et-al-2013
EGR4	Bramswig-et-al-2013
PNCK	Bramswig-et-al-2013
SLC9A9	Bramswig-et-al-2013
RAP2A	Bramswig-et-al-2013
ANKMY2	Bramswig-et-al-2013
LELP1	Bramswig-et-al-2013
TNP2	Bramswig-et-al-2013
CHAT	Bramswig-et-al-2013
APBB2	Bramswig-et-al-2013
SLC6A9	Bramswig-et-al-2013
SLC25A1	Bramswig-et-al-2013
ADAM11	Bramswig-et-al-2013
APOL3	Bramswig-et-al-2013
ARL16	Bramswig-et-al-2013
CRYBB2	Bramswig-et-al-2013
SAMD7	Bramswig-et-al-2013
YIPF2	Bramswig-et-al-2013
C17orf74	Bramswig-et-al-2013
POU2F2	Bramswig-et-al-2013
KCNAB2	Bramswig-et-al-2013
IGSF21	Bramswig-et-al-2013
FAM155A	Bramswig-et-al-2013
PLD2	Bramswig-et-al-2013
RGS8	Bramswig-et-al-2013
CNN1	Bramswig-et-al-2013
HR	Bramswig-et-al-2013
MAPT	Bramswig-et-al-2013
LZTS1	Bramswig-et-al-2013
GRIN2A	Bramswig-et-al-2013
CSF2RB	Bramswig-et-al-2013
NAALADL1	Bramswig-et-al-2013
CARD9	Bramswig-et-al-2013
ATP5L2	Bramswig-et-al-2013
MAPK15	Bramswig-et-al-2013
TRMU	Bramswig-et-al-2013
COL1A1	Bramswig-et-al-2013
PIH1D1	Bramswig-et-al-2013
TNNT2	Bramswig-et-al-2013
CSF3	Bramswig-et-al-2013
VAT1	Bramswig-et-al-2013
MYBPH	Bramswig-et-al-2013
PGAM2	Bramswig-et-al-2013
YPEL2	Bramswig-et-al-2013
LCN15	Bramswig-et-al-2013
LRP5L	Bramswig-et-al-2013
CREBL2	Bramswig-et-al-2013
TBC1D29	Bramswig-et-al-2013
PLA2G6	Bramswig-et-al-2013
RGS11	Bramswig-et-al-2013
AGAP2	Bramswig-et-al-2013
CYP4B1	Bramswig-et-al-2013
FLT3LG	Bramswig-et-al-2013
SLC34A3	Bramswig-et-al-2013
SNAPC2	Bramswig-et-al-2013
CHRDL2	Bramswig-et-al-2013
GPR68	Bramswig-et-al-2013
CSHL1	Bramswig-et-al-2013
ABCG4	Bramswig-et-al-2013
DENND1C	Bramswig-et-al-2013
CBX7	Bramswig-et-al-2013
COL23A1	Bramswig-et-al-2013
TREM2	Bramswig-et-al-2013
CAMKV	Bramswig-et-al-2013
MYO7B	Bramswig-et-al-2013
LRDD	Bramswig-et-al-2013
KLHL2	Bramswig-et-al-2013
BRUNOL5	Bramswig-et-al-2013
GMIP	Bramswig-et-al-2013
ACOT8	Bramswig-et-al-2013
MUSTN1	Bramswig-et-al-2013
KCNK1	Bramswig-et-al-2013
C20orf185	Bramswig-et-al-2013
FAM180B	Bramswig-et-al-2013
SEMA3G	Bramswig-et-al-2013
ACAD11	Bramswig-et-al-2013
EMILIN3	Bramswig-et-al-2013
SEMA4C	Bramswig-et-al-2013
UNK	Bramswig-et-al-2013
CES3	Bramswig-et-al-2013
ANKRD24	Bramswig-et-al-2013
PRSS50	Bramswig-et-al-2013
TPP1	Bramswig-et-al-2013
B4GALNT4	Bramswig-et-al-2013
MFSD2B	Bramswig-et-al-2013
ABHD1	Bramswig-et-al-2013
C1QTNF1	Bramswig-et-al-2013
CACNB1	Bramswig-et-al-2013
KRT33A	Bramswig-et-al-2013
EMP3	Bramswig-et-al-2013
CCDC105	Bramswig-et-al-2013
C2	Bramswig-et-al-2013
CD68	Bramswig-et-al-2013
PAQR6	Bramswig-et-al-2013
TNK2	Bramswig-et-al-2013
TRPM2	Bramswig-et-al-2013
COL16A1	Bramswig-et-al-2013
KIAA1614	Bramswig-et-al-2013
KIF21A	Bramswig-et-al-2013
SLC22A7	Bramswig-et-al-2013
EIF4E1B	Bramswig-et-al-2013
CCDC101	Bramswig-et-al-2013
IL11RA	Bramswig-et-al-2013
KLHL10	Bramswig-et-al-2013
CAMK1G	Bramswig-et-al-2013
IGFALS	Bramswig-et-al-2013
SORBS3	Bramswig-et-al-2013
TEF	Bramswig-et-al-2013
DFNB59	Bramswig-et-al-2013
ACHE	Bramswig-et-al-2013
SC4MOL	Bramswig-et-al-2013
HPCA	Bramswig-et-al-2013
MSTO1	Bramswig-et-al-2013
FLYWCH1	Bramswig-et-al-2013
RNF123	Bramswig-et-al-2013
GOLSYN	Bramswig-et-al-2013
ABHD8	Bramswig-et-al-2013
UNC84A	Bramswig-et-al-2013
SLC26A6	Bramswig-et-al-2013
JPH3	Bramswig-et-al-2013
SPAG8	Bramswig-et-al-2013
DDN	Bramswig-et-al-2013
CNP	Bramswig-et-al-2013
PJA2	Bramswig-et-al-2013
OTOF	Bramswig-et-al-2013
PLXNA3	Bramswig-et-al-2013
CHRNA4	Bramswig-et-al-2013
CEBPE	Bramswig-et-al-2013
METTL7A	Bramswig-et-al-2013
KRT83	Bramswig-et-al-2013
ZNF423	Bramswig-et-al-2013
PLA2G4B	Bramswig-et-al-2013
PSTPIP1	Bramswig-et-al-2013
DEFB136	Bramswig-et-al-2013
C1orf201	Bramswig-et-al-2013
DFNA5	Bramswig-et-al-2013
SPATC1	Bramswig-et-al-2013
CORO1A	Bramswig-et-al-2013
ABCA3	Bramswig-et-al-2013
OSTalpha	Bramswig-et-al-2013
TP53	Bramswig-et-al-2013
GRM6	Bramswig-et-al-2013
GRRP1	Bramswig-et-al-2013
ITGAL	Bramswig-et-al-2013
FOXA2	Bramswig-et-al-2013
UAP1L1	Bramswig-et-al-2013
PSD3	Bramswig-et-al-2013
PPP1CB	Bramswig-et-al-2013
CD37	Bramswig-et-al-2013
PLA2G4E	Bramswig-et-al-2013
ENPP7	Bramswig-et-al-2013
TRPV5	Bramswig-et-al-2013
P2RX6	Bramswig-et-al-2013
PCBP3	Bramswig-et-al-2013
WNT7B	Bramswig-et-al-2013
TMEM105	Bramswig-et-al-2013
IL12RB1	Bramswig-et-al-2013
IQSEC1	Bramswig-et-al-2013
SLC17A7	Bramswig-et-al-2013
TTLL10	Bramswig-et-al-2013
CACNA1S	Bramswig-et-al-2013
ENGASE	Bramswig-et-al-2013
TAF6L	Bramswig-et-al-2013
FBXL19	Bramswig-et-al-2013
DGCR2	Bramswig-et-al-2013
C22orf25	Bramswig-et-al-2013
RALGDS	Bramswig-et-al-2013
GZMM	Bramswig-et-al-2013
TBC1D24	Bramswig-et-al-2013
PAPL	Bramswig-et-al-2013
DMBX1	Bramswig-et-al-2013
LCAT	Bramswig-et-al-2013
BBX	Bramswig-et-al-2013
PLEKHO1	Bramswig-et-al-2013
ACADSB	Bramswig-et-al-2013
ACTN3	Bramswig-et-al-2013
CCDC151	Bramswig-et-al-2013
ULK3	Bramswig-et-al-2013
LOC390748	Bramswig-et-al-2013
DECR2	Bramswig-et-al-2013
CD207	Bramswig-et-al-2013
FCRLB	Bramswig-et-al-2013
OR8A1	Bramswig-et-al-2013
TMEM132A	Bramswig-et-al-2013
ATP4B	Bramswig-et-al-2013
CCDC7	Bramswig-et-al-2013
SH2D3C	Bramswig-et-al-2013
MYO1G	Bramswig-et-al-2013
RAB30	Bramswig-et-al-2013
TNFRSF1B	Bramswig-et-al-2013
ITLN2	Bramswig-et-al-2013
C12orf23	Bramswig-et-al-2013
NOL3	Bramswig-et-al-2013
MED25	Bramswig-et-al-2013
NRN1L	Bramswig-et-al-2013
KIAA1211	Bramswig-et-al-2013
HSPH1	Bramswig-et-al-2013
STK32C	Bramswig-et-al-2013
NCR1	Bramswig-et-al-2013
KIAA0913	Bramswig-et-al-2013
TROAP	Bramswig-et-al-2013
DHRS7	Bramswig-et-al-2013
CD14	Bramswig-et-al-2013
OCIAD2	Bramswig-et-al-2013
FLJ43860	Bramswig-et-al-2013
ADRA2C	Bramswig-et-al-2013
FBXO16	Bramswig-et-al-2013
LTA	Bramswig-et-al-2013
LRRC43	Bramswig-et-al-2013
C8orf42	Bramswig-et-al-2013
GIP	Bramswig-et-al-2013
GNG13	Bramswig-et-al-2013
TIE1	Bramswig-et-al-2013
C15orf52	Bramswig-et-al-2013
C20orf114	Bramswig-et-al-2013
CNTFR	Bramswig-et-al-2013
S100A7L2	Bramswig-et-al-2013
B3GALT4	Bramswig-et-al-2013
TACC3	Bramswig-et-al-2013
PRRT2	Bramswig-et-al-2013
TAF1C	Bramswig-et-al-2013
VPS37C	Bramswig-et-al-2013
LHB	Bramswig-et-al-2013
FAM166A	Bramswig-et-al-2013
SLC34A1	Bramswig-et-al-2013
RSPH6A	Bramswig-et-al-2013
TMEM72	Bramswig-et-al-2013
TCEA2	Bramswig-et-al-2013
DYSF	Bramswig-et-al-2013
RGS10	Bramswig-et-al-2013
RELT	Bramswig-et-al-2013
ANGPT4	Bramswig-et-al-2013
TENC1	Bramswig-et-al-2013
KIF25	Bramswig-et-al-2013
KRT79	Bramswig-et-al-2013
TMEM108	Bramswig-et-al-2013
PLA2G2E	Bramswig-et-al-2013
SURF2	Bramswig-et-al-2013
TMEM160	Bramswig-et-al-2013
TCERG1L	Bramswig-et-al-2013
ARHGDIB	Bramswig-et-al-2013
KRTAP5-6	Bramswig-et-al-2013
USP51	Bramswig-et-al-2013
DKK3	Bramswig-et-al-2013
APLP2	Bramswig-et-al-2013
LRRC16B	Bramswig-et-al-2013
PRSSL1	Bramswig-et-al-2013
PYDC2	Bramswig-et-al-2013
FAM71E2	Bramswig-et-al-2013
TMEM88	Bramswig-et-al-2013
ACD	Bramswig-et-al-2013
NPR2	Bramswig-et-al-2013
CPEB4	Bramswig-et-al-2013
ROBO4	Bramswig-et-al-2013
COL2A1	Bramswig-et-al-2013
C1orf50	Bramswig-et-al-2013
C10orf27	Bramswig-et-al-2013
CD7	Bramswig-et-al-2013
ACTR3B	Bramswig-et-al-2013
ZNF24	Bramswig-et-al-2013
CKB	Bramswig-et-al-2013
GRK6	Bramswig-et-al-2013
FLJ23834	Bramswig-et-al-2013
CYP27A1	Bramswig-et-al-2013
TMC8	Bramswig-et-al-2013
SLC23A3	Bramswig-et-al-2013
LIPT2	Bramswig-et-al-2013
ZBTB22	Bramswig-et-al-2013
LTC4S	Bramswig-et-al-2013
UROC1	Bramswig-et-al-2013
ITIH3	Bramswig-et-al-2013
TBX2	Bramswig-et-al-2013
ALDH4A1	Bramswig-et-al-2013
CCDC33	Bramswig-et-al-2013
CYP11B2	Bramswig-et-al-2013
C5orf55	Bramswig-et-al-2013
MEF2B	Bramswig-et-al-2013
FAM65C	Bramswig-et-al-2013
AEBP1	Bramswig-et-al-2013
ACAP1	Bramswig-et-al-2013
SMR3A	Bramswig-et-al-2013
CABLES1	Bramswig-et-al-2013
ZMIZ1	Bramswig-et-al-2013
LILRB4	Bramswig-et-al-2013
HCK	Bramswig-et-al-2013
CPSF1	Bramswig-et-al-2013
PSAPL1	Bramswig-et-al-2013
EPS8L3	Bramswig-et-al-2013
ABCA7	Bramswig-et-al-2013
ZDHHC2	Bramswig-et-al-2013
MAP7D1	Bramswig-et-al-2013
RHOT2	Bramswig-et-al-2013
PROCR	Bramswig-et-al-2013
FPR1	Bramswig-et-al-2013
MMP2	Bramswig-et-al-2013
MFGE8	Bramswig-et-al-2013
PDCD1	Bramswig-et-al-2013
TTC16	Bramswig-et-al-2013
KCNH1	Bramswig-et-al-2013
SLC7A5	Bramswig-et-al-2013
CST9	Bramswig-et-al-2013
LGALS9	Bramswig-et-al-2013
TTLL9	Bramswig-et-al-2013
ASPSCR1	Bramswig-et-al-2013
ZDHHC1	Bramswig-et-al-2013
ASPDH	Bramswig-et-al-2013
SPRR1A	Bramswig-et-al-2013
UBC	Bramswig-et-al-2013
ASB18	Bramswig-et-al-2013
HDAC5	Bramswig-et-al-2013
YBX2	Bramswig-et-al-2013
IP6K1	Bramswig-et-al-2013
IRF2BP2	Bramswig-et-al-2013
LOC388946	Bramswig-et-al-2013
BPIL3	Bramswig-et-al-2013
HRNBP3	Bramswig-et-al-2013
LOC401052	Bramswig-et-al-2013
VEGFB	Bramswig-et-al-2013
GAS2L1	Bramswig-et-al-2013
ADRA1A	Bramswig-et-al-2013
ACY3	Bramswig-et-al-2013
RASAL3	Bramswig-et-al-2013
TAF1A	Bramswig-et-al-2013
HOXC6	Bramswig-et-al-2013
ME1	Bramswig-et-al-2013
CRIP3	Bramswig-et-al-2013
OTOL1	Bramswig-et-al-2013
ISCU	Bramswig-et-al-2013
HOXB4	Bramswig-et-al-2013
PRODH	Bramswig-et-al-2013
EPB49	Bramswig-et-al-2013
ALOX12B	Bramswig-et-al-2013
RGR	Bramswig-et-al-2013
UBE3C	Bramswig-et-al-2013
C5orf40	Bramswig-et-al-2013
BPIL1	Bramswig-et-al-2013
SERHL2	Bramswig-et-al-2013
HPD	Bramswig-et-al-2013
KIAA1797	Bramswig-et-al-2013
SLCO3A1	Bramswig-et-al-2013
GNRH2	Bramswig-et-al-2013
CRYGB	Bramswig-et-al-2013
FGGY	Bramswig-et-al-2013
FAM167B	Bramswig-et-al-2013
SIGLEC11	Bramswig-et-al-2013
LPIN1	Bramswig-et-al-2013
PCOLCE	Bramswig-et-al-2013
ZMYND10	Bramswig-et-al-2013
SARS	Bramswig-et-al-2013
SPARC	Bramswig-et-al-2013
PIPOX	Bramswig-et-al-2013
C6orf134	Bramswig-et-al-2013
PVALB	Bramswig-et-al-2013
CD79B	Bramswig-et-al-2013
TIMP4	Bramswig-et-al-2013
NAT8L	Bramswig-et-al-2013
C16orf7	Bramswig-et-al-2013
GDF1	Bramswig-et-al-2013
NISCH	Bramswig-et-al-2013
ZMYND15	Bramswig-et-al-2013
RTP4	Bramswig-et-al-2013
TSPAN18	Bramswig-et-al-2013
ACTA1	Bramswig-et-al-2013
RXRB	Bramswig-et-al-2013
ITGAE	Bramswig-et-al-2013
ZNF707	Bramswig-et-al-2013
CSK	Bramswig-et-al-2013
SLC45A1	Bramswig-et-al-2013
FOXP4	Bramswig-et-al-2013
KLHL34	Bramswig-et-al-2013
ASPG	Bramswig-et-al-2013
KCNAB3	Bramswig-et-al-2013
C2orf40	Bramswig-et-al-2013
GOLGA7B	Bramswig-et-al-2013
ZNF263	Bramswig-et-al-2013
KRT37	Bramswig-et-al-2013
LOXHD1	Bramswig-et-al-2013
CCDC78	Bramswig-et-al-2013
ALOX15B	Bramswig-et-al-2013
MCOLN1	Bramswig-et-al-2013
ADCYAP1R1	Bramswig-et-al-2013
FAM53B	Bramswig-et-al-2013
DBH	Bramswig-et-al-2013
C20orf71	Bramswig-et-al-2013
UPK3B	Bramswig-et-al-2013
GTF3C1	Bramswig-et-al-2013
PREB	Bramswig-et-al-2013
NKX2-1	Bramswig-et-al-2013
ADAMTS7	Bramswig-et-al-2013
ACTR6	Bramswig-et-al-2013
ZNF221	Bramswig-et-al-2013
PRSS36	Bramswig-et-al-2013
SEMA6D	Bramswig-et-al-2013
PLA1A	Bramswig-et-al-2013
EFNA5	Bramswig-et-al-2013
KCTD8	Bramswig-et-al-2013
TGM1	Bramswig-et-al-2013
HOXA3	Bramswig-et-al-2013
SLC26A10	Bramswig-et-al-2013
SFTPC	Bramswig-et-al-2013
HSD11B1L	Bramswig-et-al-2013
ABCA5	Bramswig-et-al-2013
CHRM1	Bramswig-et-al-2013
DOK2	Bramswig-et-al-2013
TNNI3	Bramswig-et-al-2013
GLIS1	Bramswig-et-al-2013
ADCY4	Bramswig-et-al-2013
RAVER1	Bramswig-et-al-2013
SHROOM1	Bramswig-et-al-2013
HOXC12	Bramswig-et-al-2013
ZNF133	Bramswig-et-al-2013
C7	Bramswig-et-al-2013
SCN4A	Bramswig-et-al-2013
SLC15A3	Bramswig-et-al-2013
C14orf106	Bramswig-et-al-2013
MOV10L1	Bramswig-et-al-2013
AKT1	Bramswig-et-al-2013
CCDC155	Bramswig-et-al-2013
APPL2	Bramswig-et-al-2013
KCNA3	Bramswig-et-al-2013
ZP1	Bramswig-et-al-2013
RNF25	Bramswig-et-al-2013
UFSP1	Bramswig-et-al-2013
CANX	Bramswig-et-al-2013
ARRB2	Bramswig-et-al-2013
RUNX3	Bramswig-et-al-2013
C2orf64	Bramswig-et-al-2013
TRPM5	Bramswig-et-al-2013
GCDH	Bramswig-et-al-2013
CBFA2T3	Bramswig-et-al-2013
IL17C	Bramswig-et-al-2013
MAMSTR	Bramswig-et-al-2013
ZNF697	Bramswig-et-al-2013
LIMS2	Bramswig-et-al-2013
FGF17	Bramswig-et-al-2013
ATP6V1A	Bramswig-et-al-2013
ERLEC1	Bramswig-et-al-2013
TK1	Bramswig-et-al-2013
SLC22A18	Bramswig-et-al-2013
MORF4L2	Bramswig-et-al-2013
LAG3	Bramswig-et-al-2013
STAC2	Bramswig-et-al-2013
SPATA17	Bramswig-et-al-2013
SLC33A1	Bramswig-et-al-2013
C1orf38	Bramswig-et-al-2013
ATPGD1	Bramswig-et-al-2013
C17orf87	Bramswig-et-al-2013
LTK	Bramswig-et-al-2013
FAM100A	Bramswig-et-al-2013
EXD3	Bramswig-et-al-2013
ABO	Bramswig-et-al-2013
ATP8A1	Bramswig-et-al-2013
ARTN	Bramswig-et-al-2013
PSCA	Bramswig-et-al-2013
C19orf36	Bramswig-et-al-2013
U2AF1L4	Bramswig-et-al-2013
C3orf22	Bramswig-et-al-2013
LTB	Bramswig-et-al-2013
RCBTB2	Bramswig-et-al-2013
PDE4B	Bramswig-et-al-2013
FEM1B	Bramswig-et-al-2013
MECP2	Bramswig-et-al-2013
ALPL	Bramswig-et-al-2013
RNF44	Bramswig-et-al-2013
PRKCH	Bramswig-et-al-2013
C1orf92	Bramswig-et-al-2013
WDR90	Bramswig-et-al-2013
DNAJB5	Bramswig-et-al-2013
PITPNM1	Bramswig-et-al-2013
SCT	Bramswig-et-al-2013
COLEC11	Bramswig-et-al-2013
KRT9	Bramswig-et-al-2013
NTF3	Bramswig-et-al-2013
PTPN4	Bramswig-et-al-2013
RAB2A	Bramswig-et-al-2013
MAP4K1	Bramswig-et-al-2013
CASKIN2	Bramswig-et-al-2013
KRTAP5-5	Bramswig-et-al-2013
ROR2	Bramswig-et-al-2013
TMEM65	Bramswig-et-al-2013
SULF2	Bramswig-et-al-2013
AGRP	Bramswig-et-al-2013
PRG2	Bramswig-et-al-2013
SCRT2	Bramswig-et-al-2013
MLN	Bramswig-et-al-2013
CXXC5	Bramswig-et-al-2013
ZNF385A	Bramswig-et-al-2013
PATE4	Bramswig-et-al-2013
MAP4K2	Bramswig-et-al-2013
TP53RK	Bramswig-et-al-2013
SCUBE1	Bramswig-et-al-2013
SIX3	Bramswig-et-al-2013
CCDC88B	Bramswig-et-al-2013
CRIP1	Bramswig-et-al-2013
GPR183	Bramswig-et-al-2013
BIRC7	Bramswig-et-al-2013
CSTL1	Bramswig-et-al-2013
PIAS1	Bramswig-et-al-2013
C8G	Bramswig-et-al-2013
MCEE	Bramswig-et-al-2013
GPR144	Bramswig-et-al-2013
TREML1	Bramswig-et-al-2013
BAHCC1	Bramswig-et-al-2013
HAP1	Bramswig-et-al-2013
MST1	Bramswig-et-al-2013
MFSD2A	Bramswig-et-al-2013
C2orf81	Bramswig-et-al-2013
ASGR2	Bramswig-et-al-2013
TEPP	Bramswig-et-al-2013
THAP7	Bramswig-et-al-2013
GLRA1	Bramswig-et-al-2013
C10orf114	Bramswig-et-al-2013
TLE6	Bramswig-et-al-2013
NRN1	Bramswig-et-al-2013
ABCB9	Bramswig-et-al-2013
TMEM106B	Bramswig-et-al-2013
CYS1	Bramswig-et-al-2013
ZNF233	Bramswig-et-al-2013
SCARF1	Bramswig-et-al-2013
FXR2	Bramswig-et-al-2013
TRIM37	Bramswig-et-al-2013
SOHLH1	Bramswig-et-al-2013
CDH22	Bramswig-et-al-2013
INSRR	Bramswig-et-al-2013
KCNJ4	Bramswig-et-al-2013
IL20RA	Bramswig-et-al-2013
CDK5	Bramswig-et-al-2013
TXLNA	Bramswig-et-al-2013
SLIT3	Bramswig-et-al-2013
MYBPC2	Bramswig-et-al-2013
RICH2	Bramswig-et-al-2013
SETD1A	Bramswig-et-al-2013
TFAP2C	Bramswig-et-al-2013
D4S234E	Bramswig-et-al-2013
TSNAXIP1	Bramswig-et-al-2013
C13orf15	Bramswig-et-al-2013
NFKBIL2	Bramswig-et-al-2013
TSPAN9	Bramswig-et-al-2013
NAPA	Bramswig-et-al-2013
FMNL1	Bramswig-et-al-2013
LILRB1	Bramswig-et-al-2013
LCE2D	Bramswig-et-al-2013
RNASE13	Bramswig-et-al-2013
DNAJB8	Bramswig-et-al-2013
SLC25A24	Bramswig-et-al-2013
FAM3D	Bramswig-et-al-2013
ABI3	Bramswig-et-al-2013
ZBTB4	Bramswig-et-al-2013
SLC2A4	Bramswig-et-al-2013
FSTL4	Bramswig-et-al-2013
IGDCC3	Bramswig-et-al-2013
MYO1D	Bramswig-et-al-2013
CEMP1	Bramswig-et-al-2013
OR9G1	Bramswig-et-al-2013
OR9G9	Bramswig-et-al-2013
CPD	Bramswig-et-al-2013
GNA13	Bramswig-et-al-2013
TBC1D2	Bramswig-et-al-2013
ARAP3	Bramswig-et-al-2013
BEST2	Bramswig-et-al-2013
DIRAS2	Bramswig-et-al-2013
OR4D6	Bramswig-et-al-2013
CACNB3	Bramswig-et-al-2013
ICAM5	Bramswig-et-al-2013
RARA	Bramswig-et-al-2013
SMCR7	Bramswig-et-al-2013
MCCD1	Bramswig-et-al-2013
KNDC1	Bramswig-et-al-2013
RNF130	Bramswig-et-al-2013
PLEKHG5	Bramswig-et-al-2013
ACAN	Bramswig-et-al-2013
MDFIC	Bramswig-et-al-2013
MOGAT3	Bramswig-et-al-2013
C9orf9	Bramswig-et-al-2013
FAM181A	Bramswig-et-al-2013
PNMAL2	Bramswig-et-al-2013
C5AR1	Bramswig-et-al-2013
WDR62	Bramswig-et-al-2013
HSPA1B	Bramswig-et-al-2013
EPX	Bramswig-et-al-2013
PHC2	Bramswig-et-al-2013
COPB1	Bramswig-et-al-2013
PDE6G	Bramswig-et-al-2013
FES	Bramswig-et-al-2013
GREB1	Bramswig-et-al-2013
PCDHAC1	Bramswig-et-al-2013
CIDEA	Bramswig-et-al-2013
COL6A2	Bramswig-et-al-2013
SNCG	Bramswig-et-al-2013
GUCY2D	Bramswig-et-al-2013
ZNF511	Bramswig-et-al-2013
KLK12	Bramswig-et-al-2013
C9orf98	Bramswig-et-al-2013
SFMBT2	Bramswig-et-al-2013
HNMT	Bramswig-et-al-2013
TSC22D3	Bramswig-et-al-2013
LYNX1	Bramswig-et-al-2013
KRT1	Bramswig-et-al-2013
OLIG2	Bramswig-et-al-2013
STARD5	Bramswig-et-al-2013
DPYSL4	Bramswig-et-al-2013
LAT	Bramswig-et-al-2013
FAM116B	Bramswig-et-al-2013
WARS	Bramswig-et-al-2013
MRPL49	Bramswig-et-al-2013
NR5A1	Bramswig-et-al-2013
ANKS3	Bramswig-et-al-2013
RTBDN	Bramswig-et-al-2013
EDARADD	Bramswig-et-al-2013
NEBL	Bramswig-et-al-2013
FTSJD1	Bramswig-et-al-2013
KIF3C	Bramswig-et-al-2013
UNC5A	Bramswig-et-al-2013
PYGO1	Bramswig-et-al-2013
PAFAH1B1	Bramswig-et-al-2013
ABCA2	Bramswig-et-al-2013
CRYBB3	Bramswig-et-al-2013
NFE2L1	Bramswig-et-al-2013
BAIAP2	Bramswig-et-al-2013
TRPS1	Bramswig-et-al-2013
ACCN4	Bramswig-et-al-2013
FAM187B	Bramswig-et-al-2013
PLEKHA6	Bramswig-et-al-2013
KIAA0195	Bramswig-et-al-2013
OBP2A	Bramswig-et-al-2013
FUT7	Bramswig-et-al-2013
SDK2	Bramswig-et-al-2013
PSAP	Bramswig-et-al-2013
FMN1	Bramswig-et-al-2013
PVRIG	Bramswig-et-al-2013
REM2	Bramswig-et-al-2013
IL28A	Bramswig-et-al-2013
IDI2	Bramswig-et-al-2013
MT1A	Bramswig-et-al-2013
FGF6	Bramswig-et-al-2013
PROM2	Bramswig-et-al-2013
ACTG2	Bramswig-et-al-2013
HSP90AB1	Bramswig-et-al-2013
KRT36	Bramswig-et-al-2013
PRSS21	Bramswig-et-al-2013
EFS	Bramswig-et-al-2013
MIOX	Bramswig-et-al-2013
CABP4	Bramswig-et-al-2013
UPK2	Bramswig-et-al-2013
NOBOX	Bramswig-et-al-2013
LCN1	Bramswig-et-al-2013
TMEM161A	Bramswig-et-al-2013
UCMA	Bramswig-et-al-2013
EPO	Bramswig-et-al-2013
ATP2A1	Bramswig-et-al-2013
FOXP2	Bramswig-et-al-2013
CNGB1	Bramswig-et-al-2013
TEX9	Bramswig-et-al-2013
CELSR1	Bramswig-et-al-2013
LZTFL1	Bramswig-et-al-2013
DCST1	Bramswig-et-al-2013
CRHR1	Bramswig-et-al-2013
PKNOX2	Bramswig-et-al-2013
LINGO2	Bramswig-et-al-2013
GSTM4	Bramswig-et-al-2013
DDR1	Bramswig-et-al-2013
SLC29A2	Bramswig-et-al-2013
ALDH3B2	Bramswig-et-al-2013
RPN1	Bramswig-et-al-2013
CEACAM21	Bramswig-et-al-2013
ADRA1B	Bramswig-et-al-2013
NUDT3	Bramswig-et-al-2013
LOC100288797	Bramswig-et-al-2013
ARL6	Bramswig-et-al-2013
LDLRAD1	Bramswig-et-al-2013
SMTNL2	Bramswig-et-al-2013
GNA15	Bramswig-et-al-2013
MUC5B	Bramswig-et-al-2013
SLIT1	Bramswig-et-al-2013
C14orf180	Bramswig-et-al-2013
PRB4	Bramswig-et-al-2013
ADAMTSL5	Bramswig-et-al-2013
GRIN1	Bramswig-et-al-2013
RSPH1	Bramswig-et-al-2013
EPHX3	Bramswig-et-al-2013
CSF3R	Bramswig-et-al-2013
CCDC103	Bramswig-et-al-2013
ETV2	Bramswig-et-al-2013
ASIP	Bramswig-et-al-2013
GJC2	Bramswig-et-al-2013
C1orf57	Bramswig-et-al-2013
IKBIP	Bramswig-et-al-2013
SLC6A18	Bramswig-et-al-2013
FBRSL1	Bramswig-et-al-2013
C1QTNF6	Bramswig-et-al-2013
CD79A	Bramswig-et-al-2013
PTOV1	Bramswig-et-al-2013
TTC3	Bramswig-et-al-2013
PTPN23	Bramswig-et-al-2013
RFX8	Bramswig-et-al-2013
APOBEC2	Bramswig-et-al-2013
IGSF1	Bramswig-et-al-2013
RASGRP2	Bramswig-et-al-2013
TGFB1I1	Bramswig-et-al-2013
KLK4	Bramswig-et-al-2013
GCNT4	Bramswig-et-al-2013
SLC7A4	Bramswig-et-al-2013
C19orf71	Bramswig-et-al-2013
MAGEL2	Bramswig-et-al-2013
PCDHAC2	Bramswig-et-al-2013
PROC	Bramswig-et-al-2013
PC	Bramswig-et-al-2013
CBLN3	Bramswig-et-al-2013
CRYGN	Bramswig-et-al-2013
OSBPL8	Bramswig-et-al-2013
C9orf173	Bramswig-et-al-2013
KCNT1	Bramswig-et-al-2013
PKD1	Bramswig-et-al-2013
CTHRC1	Bramswig-et-al-2013
HSPA1A	Bramswig-et-al-2013
SAR1B	Bramswig-et-al-2013
PFDN5	Bramswig-et-al-2013
C4orf48	Bramswig-et-al-2013
TAF6	Bramswig-et-al-2013
GAS2L2	Bramswig-et-al-2013
SPATA18	Bramswig-et-al-2013
VWA5B1	Bramswig-et-al-2013
FAM169B	Bramswig-et-al-2013
EEPD1	Bramswig-et-al-2013
SKIV2L	Bramswig-et-al-2013
FCN1	Bramswig-et-al-2013
TRH	Bramswig-et-al-2013
CST11	Bramswig-et-al-2013
GBX2	Bramswig-et-al-2013
FAM129C	Bramswig-et-al-2013
TSC2	Bramswig-et-al-2013
C11orf35	Bramswig-et-al-2013
COL13A1	Bramswig-et-al-2013
PRRT4	Bramswig-et-al-2013
KRT85	Bramswig-et-al-2013
MARCH10	Bramswig-et-al-2013
ECSCR	Bramswig-et-al-2013
GRHL3	Bramswig-et-al-2013
BGN	Bramswig-et-al-2013
ARPP19	Bramswig-et-al-2013
COPG	Bramswig-et-al-2013
ALDH3A1	Bramswig-et-al-2013
AMPD3	Bramswig-et-al-2013
THRA	Bramswig-et-al-2013
CLDND2	Bramswig-et-al-2013
TNNC2	Bramswig-et-al-2013
C20orf166	Bramswig-et-al-2013
FLT4	Bramswig-et-al-2013
RHCE	Bramswig-et-al-2013
CDH2	Bramswig-et-al-2013
GABRA5	Bramswig-et-al-2013
POL3S	Bramswig-et-al-2013
BAI1	Bramswig-et-al-2013
XPR1	Bramswig-et-al-2013
CLTC	Bramswig-et-al-2013
CABP1	Bramswig-et-al-2013
CDH4	Bramswig-et-al-2013
KIAA1984	Bramswig-et-al-2013
SLC25A42	Bramswig-et-al-2013
GLCE	Bramswig-et-al-2013
EBF2	Bramswig-et-al-2013
LILRA3	Bramswig-et-al-2013
ST6GAL1	Bramswig-et-al-2013
CA14	Bramswig-et-al-2013
SLC39A7	Bramswig-et-al-2013
ACAP3	Bramswig-et-al-2013
FOXN4	Bramswig-et-al-2013
TNFRSF8	Bramswig-et-al-2013
PLXNB2	Bramswig-et-al-2013
LYPD2	Bramswig-et-al-2013
GGTLC1	Bramswig-et-al-2013
VMO1	Bramswig-et-al-2013
RTN4RL1	Bramswig-et-al-2013
TBCC	Bramswig-et-al-2013
LRRC48	Bramswig-et-al-2013
AAAS	Blodgett-et-al-2015
ABCA3	Blodgett-et-al-2015
ABCB6	Blodgett-et-al-2015
ABCC8	Blodgett-et-al-2015
ABHD4	Blodgett-et-al-2015
ABR	Blodgett-et-al-2015
ABRACL	Blodgett-et-al-2015
ACP6	Blodgett-et-al-2015
ACSL1	Blodgett-et-al-2015
ACTN4	Blodgett-et-al-2015
ACVR1B	Blodgett-et-al-2015
ADAM17	Blodgett-et-al-2015
ADAMTS2	Blodgett-et-al-2015
ADCYAP1	Blodgett-et-al-2015
ADPGK	Blodgett-et-al-2015
AES	Blodgett-et-al-2015
AFF1	Blodgett-et-al-2015
AGPAT6	Blodgett-et-al-2015
AIP	Blodgett-et-al-2015
AK092048	Blodgett-et-al-2015
AK125301	Blodgett-et-al-2015
AK311213	Blodgett-et-al-2015
AKAP17A	Blodgett-et-al-2015
AKAP8L	Blodgett-et-al-2015
AKIP1	Blodgett-et-al-2015
AKR1C1	Blodgett-et-al-2015
ALG2	Blodgett-et-al-2015
AMZ2	Blodgett-et-al-2015
ANAPC16	Blodgett-et-al-2015
ANKRD40	Blodgett-et-al-2015
ANKRD65	Blodgett-et-al-2015
ANP32E	Blodgett-et-al-2015
APMAP	Blodgett-et-al-2015
ARHGEF3	Blodgett-et-al-2015
ARL6IP4	Blodgett-et-al-2015
ASAP1	Blodgett-et-al-2015
ASB8	Blodgett-et-al-2015
ASRGL1	Blodgett-et-al-2015
ATP2A3	Blodgett-et-al-2015
ATRNL1	Blodgett-et-al-2015
BACE2	Blodgett-et-al-2015
BC065231	Blodgett-et-al-2015
BC073801	Blodgett-et-al-2015
BFAR	Blodgett-et-al-2015
BHLHE40	Blodgett-et-al-2015
BHLHE41	Blodgett-et-al-2015
BLOC1S5-TXNDC5	Blodgett-et-al-2015
BMP5	Blodgett-et-al-2015
C14orf132	Blodgett-et-al-2015
C1orf127	Blodgett-et-al-2015
C22orf42	Blodgett-et-al-2015
C6orf70	Blodgett-et-al-2015
CABP7	Blodgett-et-al-2015
CACNA1H	Blodgett-et-al-2015
CACNA2D1	Blodgett-et-al-2015
CADM1	Blodgett-et-al-2015
CALD1	Blodgett-et-al-2015
CAMKK1	Blodgett-et-al-2015
CAMLG	Blodgett-et-al-2015
CAMTA2	Blodgett-et-al-2015
CANX	Blodgett-et-al-2015
CAPN13	Blodgett-et-al-2015
CAPRIN2	Blodgett-et-al-2015
CASR	Blodgett-et-al-2015
CCDC167	Blodgett-et-al-2015
CCDC181	Blodgett-et-al-2015
CCDC90B	Blodgett-et-al-2015
CCNI	Blodgett-et-al-2015
CCPG1	Blodgett-et-al-2015
CDC14A	Blodgett-et-al-2015
CDC25B	Blodgett-et-al-2015
CDKN2D	Blodgett-et-al-2015
CHL1	Blodgett-et-al-2015
CHPF	Blodgett-et-al-2015
CHURC1	Blodgett-et-al-2015
CLCN3	Blodgett-et-al-2015
CLGN	Blodgett-et-al-2015
CLINT1	Blodgett-et-al-2015
COMMD9	Blodgett-et-al-2015
COQ6	Blodgett-et-al-2015
CPD	Blodgett-et-al-2015
CREB3	Blodgett-et-al-2015
CXXC5	Blodgett-et-al-2015
CYP2U1	Blodgett-et-al-2015
CYP4V2	Blodgett-et-al-2015
CYYR1	Blodgett-et-al-2015
DCBLD1	Blodgett-et-al-2015
DDX55	Blodgett-et-al-2015
DEGS1	Blodgett-et-al-2015
DGKD	Blodgett-et-al-2015
DGKZ	Blodgett-et-al-2015
DHDDS	Blodgett-et-al-2015
DHRS7	Blodgett-et-al-2015
DHX32	Blodgett-et-al-2015
DLGAP4	Blodgett-et-al-2015
DNAJB9	Blodgett-et-al-2015
DNAJC14	Blodgett-et-al-2015
DOCK10	Blodgett-et-al-2015
DPP6	Blodgett-et-al-2015
DPYSL2	Blodgett-et-al-2015
DQ596274	Blodgett-et-al-2015
DYNC1H1	Blodgett-et-al-2015
ECE1	Blodgett-et-al-2015
EDARADD	Blodgett-et-al-2015
EDEM3	Blodgett-et-al-2015
EEF2	Blodgett-et-al-2015
EFNA5	Blodgett-et-al-2015
EIF1AD	Blodgett-et-al-2015
EIF2D	Blodgett-et-al-2015
EIF3A	Blodgett-et-al-2015
EIF3G	Blodgett-et-al-2015
ELAVL4	Blodgett-et-al-2015
ELMO1	Blodgett-et-al-2015
ELMO2	Blodgett-et-al-2015
ENTPD3	Blodgett-et-al-2015
EPB41	Blodgett-et-al-2015
EPB41L1	Blodgett-et-al-2015
EPHX1	Blodgett-et-al-2015
EPRS	Blodgett-et-al-2015
ERO1LB	Blodgett-et-al-2015
EXOC3	Blodgett-et-al-2015
FAM105A	Blodgett-et-al-2015
FAM115A	Blodgett-et-al-2015
FAM115C	Blodgett-et-al-2015
FAM117A	Blodgett-et-al-2015
FAM118B	Blodgett-et-al-2015
FAM149A	Blodgett-et-al-2015
FAM162A	Blodgett-et-al-2015
FAM192A	Blodgett-et-al-2015
FAM219B	Blodgett-et-al-2015
FBXO17	Blodgett-et-al-2015
FKBP15	Blodgett-et-al-2015
FLCN	Blodgett-et-al-2015
FLJ31306	Blodgett-et-al-2015
FMN2	Blodgett-et-al-2015
FNDC3B	Blodgett-et-al-2015
FOXN2	Blodgett-et-al-2015
FOXO3	Blodgett-et-al-2015
FXYD2	Blodgett-et-al-2015
GFPT1	Blodgett-et-al-2015
GIT1	Blodgett-et-al-2015
GLIS3	Blodgett-et-al-2015
GLP1R	Blodgett-et-al-2015
GLRA1	Blodgett-et-al-2015
GLTSCR2	Blodgett-et-al-2015
GMPPA	Blodgett-et-al-2015
GOLGA8B	Blodgett-et-al-2015
GPS2	Blodgett-et-al-2015
GPSM1	Blodgett-et-al-2015
GRB10	Blodgett-et-al-2015
GREB1	Blodgett-et-al-2015
GREM1	Blodgett-et-al-2015
GRPEL1	Blodgett-et-al-2015
GSN	Blodgett-et-al-2015
GTF3C1	Blodgett-et-al-2015
GTPBP2	Blodgett-et-al-2015
HADH	Blodgett-et-al-2015
HARS	Blodgett-et-al-2015
HDAC6	Blodgett-et-al-2015
HDAC9	Blodgett-et-al-2015
HERC2	Blodgett-et-al-2015
HHATL	Blodgett-et-al-2015
HIPK1	Blodgett-et-al-2015
HM13	Blodgett-et-al-2015
HS6ST1	Blodgett-et-al-2015
HSD17B7	Blodgett-et-al-2015
HSDL1	Blodgett-et-al-2015
HUS1	Blodgett-et-al-2015
HYOU1	Blodgett-et-al-2015
IAPP	Blodgett-et-al-2015
IGBP1	Blodgett-et-al-2015
IGF1R	Blodgett-et-al-2015
ILF3-AS1	Blodgett-et-al-2015
INS	Blodgett-et-al-2015
ISOC1	Blodgett-et-al-2015
KCNB2	Blodgett-et-al-2015
KCNH2	Blodgett-et-al-2015
KCNJ11	Blodgett-et-al-2015
KCNQ2	Blodgett-et-al-2015
KDM1B	Blodgett-et-al-2015
KIAA0226	Blodgett-et-al-2015
KIAA0247	Blodgett-et-al-2015
KIAA0319L	Blodgett-et-al-2015
KIAA0355	Blodgett-et-al-2015
KIAA1715	Blodgett-et-al-2015
KIAA1932	Blodgett-et-al-2015
KIF1A	Blodgett-et-al-2015
KIF5C	Blodgett-et-al-2015
KLHL42	Blodgett-et-al-2015
LARP1	Blodgett-et-al-2015
LENG8	Blodgett-et-al-2015
LIMS1	Blodgett-et-al-2015
LINC00152	Blodgett-et-al-2015
LINC00263	Blodgett-et-al-2015
LINC00673	Blodgett-et-al-2015
LLPH	Blodgett-et-al-2015
LOC100288069	Blodgett-et-al-2015
LOC150776	Blodgett-et-al-2015
LOC154761	Blodgett-et-al-2015
LOC339047	Blodgett-et-al-2015
LRRTM3	Blodgett-et-al-2015
LUZP6	Blodgett-et-al-2015
MAATS1	Blodgett-et-al-2015
MAFA	Blodgett-et-al-2015
MAGT1	Blodgett-et-al-2015
MAP1A	Blodgett-et-al-2015
MAP1B	Blodgett-et-al-2015
MAP2	Blodgett-et-al-2015
MAPRE3	Blodgett-et-al-2015
MAPT	Blodgett-et-al-2015
MAST4	Blodgett-et-al-2015
MAU2	Blodgett-et-al-2015
MBD6	Blodgett-et-al-2015
MBNL1	Blodgett-et-al-2015
MCF2L2	Blodgett-et-al-2015
MCTP2	Blodgett-et-al-2015
MDC1	Blodgett-et-al-2015
MDM2	Blodgett-et-al-2015
ME3	Blodgett-et-al-2015
MEGF9	Blodgett-et-al-2015
MESDC2	Blodgett-et-al-2015
MGAT4A	Blodgett-et-al-2015
MLEC	Blodgett-et-al-2015
MLLT6	Blodgett-et-al-2015
MLXIPL	Blodgett-et-al-2015
MNX1	Blodgett-et-al-2015
MPP1	Blodgett-et-al-2015
MRPS10	Blodgett-et-al-2015
MTDH	Blodgett-et-al-2015
MTHFD2	Blodgett-et-al-2015
MYH14	Blodgett-et-al-2015
NADSYN1	Blodgett-et-al-2015
NBPF24	Blodgett-et-al-2015
NBPF9	Blodgett-et-al-2015
NBR2	Blodgett-et-al-2015
NCOA2	Blodgett-et-al-2015
NCOR2	Blodgett-et-al-2015
NDRG4	Blodgett-et-al-2015
NEFM	Blodgett-et-al-2015
NFE2L1	Blodgett-et-al-2015
NFIC	Blodgett-et-al-2015
NIN	Blodgett-et-al-2015
NKX2-2	Blodgett-et-al-2015
NKX6-1	Blodgett-et-al-2015
NOL8	Blodgett-et-al-2015
NONO	Blodgett-et-al-2015
NPTX2	Blodgett-et-al-2015
NR3C1	Blodgett-et-al-2015
OLFM1	Blodgett-et-al-2015
OXA1L	Blodgett-et-al-2015
P4HB	Blodgett-et-al-2015
PARD3	Blodgett-et-al-2015
PARP4	Blodgett-et-al-2015
PARVB	Blodgett-et-al-2015
PAX6	Blodgett-et-al-2015
PCSK1	Blodgett-et-al-2015
PCYOX1	Blodgett-et-al-2015
PDE4DIP	Blodgett-et-al-2015
PDIA4	Blodgett-et-al-2015
PDX1	Blodgett-et-al-2015
PDZD8	Blodgett-et-al-2015
PEPD	Blodgett-et-al-2015
PFKFB2	Blodgett-et-al-2015
PHACTR2	Blodgett-et-al-2015
PIGH	Blodgett-et-al-2015
PILRB	Blodgett-et-al-2015
PKIB	Blodgett-et-al-2015
PKN1	Blodgett-et-al-2015
PKP2	Blodgett-et-al-2015
PLCL2	Blodgett-et-al-2015
PLCXD3	Blodgett-et-al-2015
PLEKHM2	Blodgett-et-al-2015
PLXNB2	Blodgett-et-al-2015
PNLIPRP1	Blodgett-et-al-2015
PPP1R2	Blodgett-et-al-2015
PREB	Blodgett-et-al-2015
PRPF18	Blodgett-et-al-2015
PRPF3	Blodgett-et-al-2015
PRPH	Blodgett-et-al-2015
PRSS23	Blodgett-et-al-2015
PSMB5	Blodgett-et-al-2015
PTBP3	Blodgett-et-al-2015
PTCH1	Blodgett-et-al-2015
PTCHD3P1	Blodgett-et-al-2015
PTPN23	Blodgett-et-al-2015
PTPN3	Blodgett-et-al-2015
PTPRM	Blodgett-et-al-2015
PVRL3	Blodgett-et-al-2015
RAB15	Blodgett-et-al-2015
RAB3GAP1	Blodgett-et-al-2015
RABL5	Blodgett-et-al-2015
RALBP1	Blodgett-et-al-2015
RALGDS	Blodgett-et-al-2015
RASA4	Blodgett-et-al-2015
RASA4CP	Blodgett-et-al-2015
RBBP8	Blodgett-et-al-2015
RBCK1	Blodgett-et-al-2015
RBM7	Blodgett-et-al-2015
RBP4	Blodgett-et-al-2015
REG1B	Blodgett-et-al-2015
REG3A	Blodgett-et-al-2015
RELL1	Blodgett-et-al-2015
REPIN1	Blodgett-et-al-2015
REPS1	Blodgett-et-al-2015
RERE	Blodgett-et-al-2015
RFFL	Blodgett-et-al-2015
RGCC	Blodgett-et-al-2015
RGL1	Blodgett-et-al-2015
RGS16	Blodgett-et-al-2015
RMND5A	Blodgett-et-al-2015
RNF130	Blodgett-et-al-2015
RNF20	Blodgett-et-al-2015
ROBO1	Blodgett-et-al-2015
ROBO2	Blodgett-et-al-2015
RPH3AL	Blodgett-et-al-2015
RPL36AL	Blodgett-et-al-2015
RPL7L1	Blodgett-et-al-2015
RPP38	Blodgett-et-al-2015
RPPH1	Blodgett-et-al-2015
RPS18	Blodgett-et-al-2015
RRAGA	Blodgett-et-al-2015
RRAGD	Blodgett-et-al-2015
RSL24D1	Blodgett-et-al-2015
SCAMP2	Blodgett-et-al-2015
SCARNA6	Blodgett-et-al-2015
SCD5	Blodgett-et-al-2015
SEC61A1	Blodgett-et-al-2015
SEMA4D	Blodgett-et-al-2015
SEMA6D	Blodgett-et-al-2015
SF3A3	Blodgett-et-al-2015
SHC1	Blodgett-et-al-2015
SIPA1L1	Blodgett-et-al-2015
SIPA1L2	Blodgett-et-al-2015
SIX2	Blodgett-et-al-2015
SLC18A2	Blodgett-et-al-2015
SLC33A1	Blodgett-et-al-2015
SLC35F6	Blodgett-et-al-2015
SLC6A17	Blodgett-et-al-2015
SLC7A5	Blodgett-et-al-2015
SLC8A1	Blodgett-et-al-2015
SLMAP	Blodgett-et-al-2015
SMAD7	Blodgett-et-al-2015
SMIM14	Blodgett-et-al-2015
SMIM15	Blodgett-et-al-2015
SOCS6	Blodgett-et-al-2015
SORL1	Blodgett-et-al-2015
SPATA13	Blodgett-et-al-2015
SPCS3	Blodgett-et-al-2015
SPP1	Blodgett-et-al-2015
SPRYD7	Blodgett-et-al-2015
SPTAN1	Blodgett-et-al-2015
SPTLC1	Blodgett-et-al-2015
SREBF1	Blodgett-et-al-2015
SSH1	Blodgett-et-al-2015
STAM	Blodgett-et-al-2015
STIM1	Blodgett-et-al-2015
STT3A	Blodgett-et-al-2015
STX1A	Blodgett-et-al-2015
SUN2	Blodgett-et-al-2015
SYNE2	Blodgett-et-al-2015
SYT13	Blodgett-et-al-2015
SYT7	Blodgett-et-al-2015
SYVN1	Blodgett-et-al-2015
SZT2	Blodgett-et-al-2015
TAF15	Blodgett-et-al-2015
TAF1D	Blodgett-et-al-2015
TAOK3	Blodgett-et-al-2015
TAZ	Blodgett-et-al-2015
TBC1D14	Blodgett-et-al-2015
TBC1D4	Blodgett-et-al-2015
TBC1D5	Blodgett-et-al-2015
TCP11L2	Blodgett-et-al-2015
TENC1	Blodgett-et-al-2015
TESK1	Blodgett-et-al-2015
TGFBR3	Blodgett-et-al-2015
TIMP2	Blodgett-et-al-2015
TIPRL	Blodgett-et-al-2015
TKT	Blodgett-et-al-2015
TM9SF1	Blodgett-et-al-2015
TMCC3	Blodgett-et-al-2015
TMED6	Blodgett-et-al-2015
TMEM109	Blodgett-et-al-2015
TMEM123	Blodgett-et-al-2015
TMEM167A	Blodgett-et-al-2015
TMEM17	Blodgett-et-al-2015
TMEM175	Blodgett-et-al-2015
TMEM181	Blodgett-et-al-2015
TMEM184B	Blodgett-et-al-2015
TMEM25	Blodgett-et-al-2015
TMEM37	Blodgett-et-al-2015
TMEM63C	Blodgett-et-al-2015
TMOD2	Blodgett-et-al-2015
TMX1	Blodgett-et-al-2015
TNFAIP3	Blodgett-et-al-2015
TNIK	Blodgett-et-al-2015
TNIP1	Blodgett-et-al-2015
TNS1	Blodgett-et-al-2015
TOM1L1	Blodgett-et-al-2015
TPPP	Blodgett-et-al-2015
TRAP1	Blodgett-et-al-2015
TRIM8	Blodgett-et-al-2015
TRPM3	Blodgett-et-al-2015
TSHZ1	Blodgett-et-al-2015
TSPAN1	Blodgett-et-al-2015
TSPYL5	Blodgett-et-al-2015
TTC7B	Blodgett-et-al-2015
TTC8	Blodgett-et-al-2015
TUBA1C	Blodgett-et-al-2015
TUBB2A	Blodgett-et-al-2015
TVP23C	Blodgett-et-al-2015
TXNDC15	Blodgett-et-al-2015
TXNRD1	Blodgett-et-al-2015
UBE2E3	Blodgett-et-al-2015
UBE3C	Blodgett-et-al-2015
UBXN1	Blodgett-et-al-2015
UCHL1	Blodgett-et-al-2015
ULK3	Blodgett-et-al-2015
UNC13B	Blodgett-et-al-2015
USE1	Blodgett-et-al-2015
UTP14C	Blodgett-et-al-2015
VAT1	Blodgett-et-al-2015
VAT1L	Blodgett-et-al-2015
VEGFA	Blodgett-et-al-2015
VLDLR	Blodgett-et-al-2015
VTI1B	Blodgett-et-al-2015
VWDE	Blodgett-et-al-2015
WARS	Blodgett-et-al-2015
WASF3	Blodgett-et-al-2015
WASH2P	Blodgett-et-al-2015
WASH5P	Blodgett-et-al-2015
[truncated: 15 more rows]

## Sheet: Reported_Alpha_Genes_ANOVA
Expression in Endocrine Cells	Number of Genes (out of 1853 genes)	Gene Symbol
Beta	11	MRPL13, MRPL35, FGF14, DIP2C, PPP4R2, PRDX3, MRPL42, PIGP, IGFBP5, TULP4, ANP32E
Alpha	75	MMAB, MPC2, LAMB1, PDZK1, PIGT, HLA-B, CAPZA1, HPS1, PTPRT, PYROXD2, LOXL4, CGRRF1, C19orf77, HMGB3, OGT, TMEM164, ECH1, MAMLD1, LPPR1, SPC25, MUC13, FAM84A, VGF, CAMK2G, F10, MCOLN3, SYNPO, FAM110B, FAP, GCG, GCNT1, IRX2, DPP4, SMOC1, PARP9, PTP4A1, FXYD5, GPC6, YIPF2, SORBS1, BSCL2, GPR119, ST7, GLS, FAM46A, NUCB1, SNRPG, PPP2R2B, ABHD15, CD164, SMARCA1, ANK2, PDE3B, PLCE1, ANXA4, ELL2, CDH1, R…
Delta	37	RC3H1, ATF6, DYNC2H1, SESN3, RABL2B, FGF12, PCF11, ELMSAN1, MDK, MUM1, C14orf159, UIMC1, S100B, PCNT, MYEF2, N4BP2, GRINA, TTN, SSTR1, UGT8, PAQR7, SKIL, RNF216, USP24, PSMB6, ZNF675, PROX1, HECTD2, HIST1H2BD, C1orf74, NAV3, CFI, TMED8, WEE1, KIAA1217, SAMD5, GABRB3
Gamma	46	PSMB5, RAB3GAP2, TLE3, HN1, PPY, RAP1GAP, ARPC1B, PXK, PEG10, NDUFS3, RUFY1, SYNGR2, PLXNB1, C16orf45, GSS, NR4A1, ST3GAL5, ACOT7, ABCB1, GATM, SMARCA4, CTTNBP2, SLC6A4, FEV, BCR, HGSNAT, SEC24D, TPH1, BTG1, NUP214, DMD, LIMA1, HIST1H1E, GLRX, WDR34, ZFP90, GCNT3, SERTM1, CLCN5, PTP4A3, ID4, MTMR11, SF1, ATP2B4, ISYNA1, FGFR1
Beta.Alpha	18	THYN1, RAB3C, CD99L2, SLC7A8, POLR2I, DDAH1, GNG4, CNTN1, SDC2, KDELR1, SYNGR4, MLLT11, ELOVL5, MDH2, CNTN4, SEZ6L, ETFDH, CD99
Beta.Delta	4	HEPACAM2, SEMA5A, TRIP12, COMMD1
Beta.Gamma	1	STMN2
Alpha.Delta	13	PAPPA2, VIM, NDUFAF3, SLC38A4, MBOAT4, GPX3, RFX6, A1CF, LDHA, CHKA, ASXL3, NRP1, KCNJ2
Alpha.Gamma	33	CKAP4, TSPAN2, PTPN13, SSX2IP, NRSN2, GRIA3, RGS4, NPNT, FABP5, PLIN3, PDK4, TMEM45B, GPR114, SCG2, APOH, CLU, TOX3, FXYD3, CRYBA2, CPNE8, S100A10, PLS1, PCSK2, ARX, KCNJ3, CSGALNACT1, SLC40A1, KCNMB2, KCNH6, SH3RF1, CHGB, EZR, GC
Gamma.Delta	5	ABCC9, DIRAS3, MS4A8, AKAP12, KANK1
Beta.Alpha.Delta	6	COPS3, IDI1, KCNJ6, HIGD1A, ABLIM1, FKBP2
Beta.Alpha.Gamma	3	TMEM14A, ALDH1A1, SCGB2A1
Alpha.Gamma.Delta	12	SERPINA1, TM4SF4, TJP2, FXYD6, KCTD12, SEMA3E, USH1C, MYO10, SPATS2L, TMEM176A, TMEM176B, QDPR
Pan-Islet	285	NAV1, TMEM9, LRCH3, CACNB2, GPATCH8, SENP5, PRRC2C, ATP1B1, PBX1, UFC1, F11R, HIF1A, GTF2I, GPATCH2L, EIF3C, INSR, ATP5J2, TCTA, RBM8A, RHOA, MPDU1, PDHB, KIAA1377, FKBP9, CBX5, CHD4, CHGA, QRICH1, NDUFAB1, UBR4, CD47, UBE2D3, NRXN1, IP6K2, GCH1, AKAP13, PPP3CA, PPP1R9A, MAP3K13, UBA6, ATCAY, R3HDM1, MEAF6, STAT5B, SAMD4B, PAK3, POLR2J3, NDUFA3, RPS17, VMA21, CYCS, BIRC5, ANKRD11, UBB, SFPQ, DNAJ…
Lowly Expressed (Average Log2CPM < 2 across all islet cells)	625	RABIF, UBE2T, PLXDC2, B3GALT2, ASTN1, DAO, PTPLA, DUSP12, HDAC5, BTBD11, ITLN1, GATSL2, CYB5D1, TMEM88, BOC, SLAMF9, EFNB3, CBLL1, CCDC19, SERPINA11, SERPINA6, SERPINA10, PPP4R4, SOX15, SEC31B, NBPF3, FAM65A, ACYP1, RAB3A, SLC25A23, ATXN7L1, NPSR1, C14orf37, ABHD6, DNASE1L3, CHAC2, SLC35F4, NBL1, VPS37D, ARHGEF11, WFDC2, TTLL13, ADCY6, OCM2, PRCC, EXOG, CRIP1, CRABP2, C12orf68, TAC1, GDAP1L1, ARE…
< 4-fold change	679	NMT1, C2orf74, REL, ZBTB41, ARL5B, MR1, QSOX1, TMEM236, PIGX, RUNDC3A, TCTEX1D2, DCAF6, PRDM4, G6PC3, CRY1, MTERFD3, POM121C, LSMD1, DCAF8, RTN1, LAT2, DAG1, ZNF394, C14orf1, ZNF789, PEX11B, POLR3GL, PSME4, TTLL5, KCTD6, HERPUD2, GTF2F1, C11orf70, PGR, C14orf142, TRAPPC9, TRRAP, GSTCD, SRPK2, CAPZB, RANBP3, LYRM5, QARS, ITPK1, ORC4, RBBP6, EIF4A3, SYS1, LLGL1, UBE2A, POLR2A, FLNB, TET2, KANSL2, T…

## Sheet: Alpha_Reported_Genes
Gene_Symbol	Category_or_Study
GCG	Dorrell-et-al-2011
POPDC3	Dorrell-et-al-2011
LOXL4	Dorrell-et-al-2011
GRIN3A	Dorrell-et-al-2011
STK32B	Dorrell-et-al-2011
SPINK4	Dorrell-et-al-2011
CRH	Dorrell-et-al-2011
THC2690347	Dorrell-et-al-2011
GC	Dorrell-et-al-2011
FAP	Dorrell-et-al-2011
GJA3	Dorrell-et-al-2011
MUCL1	Dorrell-et-al-2011
AI492422	Dorrell-et-al-2011
SYNDIG1	Dorrell-et-al-2011
VIM	Dorrell-et-al-2011
STC2	Dorrell-et-al-2011
PTPRT	Dorrell-et-al-2011
MUC13	Dorrell-et-al-2011
BQ286187	Dorrell-et-al-2011
IRX2	Dorrell-et-al-2011
THC2496213	Dorrell-et-al-2011
RP11-35N6.1	Dorrell-et-al-2011
F10	Dorrell-et-al-2011
ARX	Dorrell-et-al-2011
BVES	Dorrell-et-al-2011
NPNT	Dorrell-et-al-2011
C11orf41	Dorrell-et-al-2011
FXYD5	Dorrell-et-al-2011
BQ777622	Dorrell-et-al-2011
GCG	Nica-et-al-2013
TTR	Nica-et-al-2013
CLU	Nica-et-al-2013
GC	Nica-et-al-2013
SERPINA1	Nica-et-al-2013
MUC13	Nica-et-al-2013
PTP4A3	Nica-et-al-2013
TM4SF4	Nica-et-al-2013
TMEM176A	Nica-et-al-2013
EZR	Nica-et-al-2013
TPM4	Nica-et-al-2013
CRYBA2	Nica-et-al-2013
IGFBP2	Nica-et-al-2013
COTL1	Nica-et-al-2013
LOXL4	Nica-et-al-2013
TMEM176B	Nica-et-al-2013
F10	Nica-et-al-2013
KCTD12	Nica-et-al-2013
APOH	Nica-et-al-2013
LSR	Nica-et-al-2013
C19orf77	Nica-et-al-2013
FOSL2	Nica-et-al-2013
LMNA	Nica-et-al-2013
IRX2	Nica-et-al-2013
PAPPA2	Nica-et-al-2013
ARX	Nica-et-al-2013
VWA1	Nica-et-al-2013
SMOC1	Nica-et-al-2013
RAP1GAP	Nica-et-al-2013
KBTBD10	Nica-et-al-2013
FAP	Nica-et-al-2013
VSTM2L	Nica-et-al-2013
FEV	Nica-et-al-2013
MYO10	Nica-et-al-2013
KCNJ3	Nica-et-al-2013
SEPT9	Nica-et-al-2013
NPNT	Nica-et-al-2013
MAMLD1	Nica-et-al-2013
FXYD5	Nica-et-al-2013
NEDD9	Nica-et-al-2013
AHNAK	Nica-et-al-2013
LBH	Nica-et-al-2013
DUSP4	Nica-et-al-2013
TTR	Bramswig-et-al-2013
TM4SF4	Bramswig-et-al-2013
GC	Bramswig-et-al-2013
CRYBA2	Bramswig-et-al-2013
LOXL4	Bramswig-et-al-2013
APOH	Bramswig-et-al-2013
PPY	Bramswig-et-al-2013
ALDH1A1	Bramswig-et-al-2013
MBOAT4	Bramswig-et-al-2013
MUC13	Bramswig-et-al-2013
FAM23A	Bramswig-et-al-2013
SERPINA1	Bramswig-et-al-2013
FAP	Bramswig-et-al-2013
NPNT	Bramswig-et-al-2013
CD36	Bramswig-et-al-2013
F10	Bramswig-et-al-2013
IRX2	Bramswig-et-al-2013
DPP4	Bramswig-et-al-2013
PAPPA2	Bramswig-et-al-2013
C19orf77	Bramswig-et-al-2013
IGFBPL1	Bramswig-et-al-2013
GCG	Bramswig-et-al-2013
SEMA3E	Bramswig-et-al-2013
TMEM176B	Bramswig-et-al-2013
TMEM176A	Bramswig-et-al-2013
KBTBD10	Bramswig-et-al-2013
ARX	Bramswig-et-al-2013
TMEM45B	Bramswig-et-al-2013
HIST1H2AG	Bramswig-et-al-2013
SMOC1	Bramswig-et-al-2013
FSTL5	Bramswig-et-al-2013
SERPINE2	Bramswig-et-al-2013
C13orf36	Bramswig-et-al-2013
KCTD12	Bramswig-et-al-2013
GPC6	Bramswig-et-al-2013
SPOCK3	Bramswig-et-al-2013
GPR119	Bramswig-et-al-2013
HMP19	Bramswig-et-al-2013
POPDC3	Bramswig-et-al-2013
LPPR1	Bramswig-et-al-2013
CHGA	Bramswig-et-al-2013
RGS4	Bramswig-et-al-2013
PLCE1	Bramswig-et-al-2013
SSX2IP	Bramswig-et-al-2013
HIST1H3B	Bramswig-et-al-2013
CLU	Bramswig-et-al-2013
FAM83B	Bramswig-et-al-2013
KL	Bramswig-et-al-2013
TMEM90B	Bramswig-et-al-2013
KCNJ3	Bramswig-et-al-2013
GALNT13	Bramswig-et-al-2013
HIST1H3C	Bramswig-et-al-2013
FGA	Bramswig-et-al-2013
CRH	Bramswig-et-al-2013
HIST1H2BJ	Bramswig-et-al-2013
VSTM2L	Bramswig-et-al-2013
GLS	Bramswig-et-al-2013
ADORA2A	Bramswig-et-al-2013
PDZK1	Bramswig-et-al-2013
C3orf57	Bramswig-et-al-2013
STAT4	Bramswig-et-al-2013
CALY	Bramswig-et-al-2013
PALLD	Bramswig-et-al-2013
KCNIP1	Bramswig-et-al-2013
HECW2	Bramswig-et-al-2013
SPINK4	Bramswig-et-al-2013
HTR1F	Bramswig-et-al-2013
CAMK2G	Bramswig-et-al-2013
PDK3	Bramswig-et-al-2013
LDB2	Bramswig-et-al-2013
STK32B	Bramswig-et-al-2013
COTL1	Bramswig-et-al-2013
TOP2A	Bramswig-et-al-2013
USP27X	Bramswig-et-al-2013
RAPGEF4	Bramswig-et-al-2013
CHGB	Bramswig-et-al-2013
PCSK2	Bramswig-et-al-2013
USH1C	Bramswig-et-al-2013
SLC38A4	Bramswig-et-al-2013
FGB	Bramswig-et-al-2013
GPX3	Bramswig-et-al-2013
MMP16	Bramswig-et-al-2013
PDK4	Bramswig-et-al-2013
SLC35F4	Bramswig-et-al-2013
SLC7A2	Bramswig-et-al-2013
HIST1H2AB	Bramswig-et-al-2013
C6orf142	Bramswig-et-al-2013
CPNE8	Bramswig-et-al-2013
HMGB3	Bramswig-et-al-2013
NUSAP1	Bramswig-et-al-2013
RSAD2	Bramswig-et-al-2013
SNTG1	Bramswig-et-al-2013
SAMD5	Bramswig-et-al-2013
IL10RA	Bramswig-et-al-2013
GLT1D1	Bramswig-et-al-2013
CNTN1	Bramswig-et-al-2013
SLC7A14	Bramswig-et-al-2013
LPPR4	Bramswig-et-al-2013
PTP4A3	Bramswig-et-al-2013
VEGFC	Bramswig-et-al-2013
VSNL1	Bramswig-et-al-2013
SERPINA10	Bramswig-et-al-2013
LOC401097	Bramswig-et-al-2013
SCG2	Bramswig-et-al-2013
GCH1	Bramswig-et-al-2013
ANK2	Bramswig-et-al-2013
ENAM	Bramswig-et-al-2013
GPR64	Bramswig-et-al-2013
TNFRSF19	Bramswig-et-al-2013
BUB1	Bramswig-et-al-2013
GJA3	Bramswig-et-al-2013
HLA-A	Bramswig-et-al-2013
XAGE5	Bramswig-et-al-2013
UBE2T	Bramswig-et-al-2013
PPP2R2B	Bramswig-et-al-2013
PTPRT	Bramswig-et-al-2013
FABP5	Bramswig-et-al-2013
PPP1R14C	Bramswig-et-al-2013
HIGD1A	Bramswig-et-al-2013
SSTR2	Bramswig-et-al-2013
LBH	Bramswig-et-al-2013
ASXL3	Bramswig-et-al-2013
GPR19	Bramswig-et-al-2013
GRIA3	Bramswig-et-al-2013
FGG	Bramswig-et-al-2013
FTL	Bramswig-et-al-2013
HIST1H2BB	Bramswig-et-al-2013
MLLT11	Bramswig-et-al-2013
CP	Bramswig-et-al-2013
CALCB	Bramswig-et-al-2013
PPP4R4	Bramswig-et-al-2013
PRKG2	Bramswig-et-al-2013
VIM	Bramswig-et-al-2013
ITPR1	Bramswig-et-al-2013
B2M	Bramswig-et-al-2013
RFX6	Bramswig-et-al-2013
GLRX	Bramswig-et-al-2013
NBL1	Bramswig-et-al-2013
IL13RA2	Bramswig-et-al-2013
PRKCE	Bramswig-et-al-2013
TRPC4	Bramswig-et-al-2013
CYP4F3	Bramswig-et-al-2013
MBOAT2	Bramswig-et-al-2013
C1orf168	Bramswig-et-al-2013
KCNJ6	Bramswig-et-al-2013
SH3KBP1	Bramswig-et-al-2013
C2orf54	Bramswig-et-al-2013
CCNA2	Bramswig-et-al-2013
CDC2	Bramswig-et-al-2013
GCNT1	Bramswig-et-al-2013
LEAP2	Bramswig-et-al-2013
MCOLN3	Bramswig-et-al-2013
EPHA4	Bramswig-et-al-2013
IL22	Bramswig-et-al-2013
QDPR	Bramswig-et-al-2013
KCNA5	Bramswig-et-al-2013
MYL6	Bramswig-et-al-2013
SLC6A4	Bramswig-et-al-2013
BTBD11	Bramswig-et-al-2013
NLGN4Y	Bramswig-et-al-2013
HIST1H2AH	Bramswig-et-al-2013
ABCG2	Bramswig-et-al-2013
SEPT6	Bramswig-et-al-2013
C11orf41	Bramswig-et-al-2013
ABHD15	Bramswig-et-al-2013
CDKN3	Bramswig-et-al-2013
FXYD5	Bramswig-et-al-2013
DDC	Bramswig-et-al-2013
C5orf32	Bramswig-et-al-2013
TSPAN7	Bramswig-et-al-2013
CLCN5	Bramswig-et-al-2013
FGF12	Bramswig-et-al-2013
ZDHHC14	Bramswig-et-al-2013
CD99L2	Bramswig-et-al-2013
TCEAL5	Bramswig-et-al-2013
C11orf70	Bramswig-et-al-2013
LY75	Bramswig-et-al-2013
PIP	Bramswig-et-al-2013
IGFBP3	Bramswig-et-al-2013
CD99	Bramswig-et-al-2013
GNAZ	Bramswig-et-al-2013
CNIH3	Bramswig-et-al-2013
ASAH1	Bramswig-et-al-2013
STON2	Bramswig-et-al-2013
DIRAS3	Bramswig-et-al-2013
ABCB1	Bramswig-et-al-2013
ZNF185	Bramswig-et-al-2013
GNAI1	Bramswig-et-al-2013
STK32A	Bramswig-et-al-2013
PEG10	Bramswig-et-al-2013
KLKB1	Bramswig-et-al-2013
C4orf44	Bramswig-et-al-2013
PGR	Bramswig-et-al-2013
TMEM31	Bramswig-et-al-2013
TMCO5A	Bramswig-et-al-2013
PCDH20	Bramswig-et-al-2013
MMRN1	Bramswig-et-al-2013
SNTG2	Bramswig-et-al-2013
HIST1H4I	Bramswig-et-al-2013
SPINT2	Bramswig-et-al-2013
CPLX2	Bramswig-et-al-2013
C1QTNF3	Bramswig-et-al-2013
HIST1H1A	Bramswig-et-al-2013
CDO1	Bramswig-et-al-2013
SCGB3A2	Bramswig-et-al-2013
PKIA	Bramswig-et-al-2013
LRRTM2	Bramswig-et-al-2013
PTPLA	Bramswig-et-al-2013
RNF150	Bramswig-et-al-2013
PLCH1	Bramswig-et-al-2013
ZNF107	Bramswig-et-al-2013
CDH12	Bramswig-et-al-2013
ACMSD	Bramswig-et-al-2013
CSRNP3	Bramswig-et-al-2013
CD82	Bramswig-et-al-2013
FAM111A	Bramswig-et-al-2013
RPS6KA3	Bramswig-et-al-2013
CXorf57	Bramswig-et-al-2013
GCNT3	Bramswig-et-al-2013
CSAG1	Bramswig-et-al-2013
ATP1B1	Bramswig-et-al-2013
CSGALNACT1	Bramswig-et-al-2013
ABHD14A	Bramswig-et-al-2013
OCRL	Bramswig-et-al-2013
PTPRN2	Bramswig-et-al-2013
PCDH9	Bramswig-et-al-2013
AURKC	Bramswig-et-al-2013
FAM104B	Bramswig-et-al-2013
TECTB	Bramswig-et-al-2013
SCGB2A1	Bramswig-et-al-2013
MYH10	Bramswig-et-al-2013
ITGA1	Bramswig-et-al-2013
SESN3	Bramswig-et-al-2013
GRAMD4	Bramswig-et-al-2013
PDE4D	Bramswig-et-al-2013
RAB3C	Bramswig-et-al-2013
ITGB1	Bramswig-et-al-2013
HIST1H2AD	Bramswig-et-al-2013
MIA2	Bramswig-et-al-2013
GPR142	Bramswig-et-al-2013
C14orf174	Bramswig-et-al-2013
SPC25	Bramswig-et-al-2013
LOC389493	Bramswig-et-al-2013
KIAA1377	Bramswig-et-al-2013
GALNT8	Bramswig-et-al-2013
TMEM164	Bramswig-et-al-2013
QPCT	Bramswig-et-al-2013
C15orf48	Bramswig-et-al-2013
TMSB15B	Bramswig-et-al-2013
IGFBP7	Bramswig-et-al-2013
BVES	Bramswig-et-al-2013
SORBS1	Bramswig-et-al-2013
FAM84A	Bramswig-et-al-2013
ZNF93	Bramswig-et-al-2013
PLXDC2	Bramswig-et-al-2013
SCN3A	Bramswig-et-al-2013
BCAM	Bramswig-et-al-2013
LRRC49	Bramswig-et-al-2013
VSTM2A	Bramswig-et-al-2013
OSBPL6	Bramswig-et-al-2013
GCLM	Bramswig-et-al-2013
C9orf4	Bramswig-et-al-2013
THEM5	Bramswig-et-al-2013
S100Z	Bramswig-et-al-2013
HLA-B	Bramswig-et-al-2013
SMARCA1	Bramswig-et-al-2013
MOBKL1A	Bramswig-et-al-2013
CA8	Bramswig-et-al-2013
NGFRAP1	Bramswig-et-al-2013
AGFG2	Bramswig-et-al-2013
MAP7D2	Bramswig-et-al-2013
IRX1	Bramswig-et-al-2013
C2orf72	Bramswig-et-al-2013
MTMR7	Bramswig-et-al-2013
SCML2	Bramswig-et-al-2013
ESRRG	Bramswig-et-al-2013
TAC1	Bramswig-et-al-2013
C11orf49	Bramswig-et-al-2013
LMCD1	Bramswig-et-al-2013
VWA1	Bramswig-et-al-2013
ZNF813	Bramswig-et-al-2013
GYG2	Bramswig-et-al-2013
PTPRD	Bramswig-et-al-2013
FGF14	Bramswig-et-al-2013
ZNF789	Bramswig-et-al-2013
OR1B1	Bramswig-et-al-2013
GCNT2	Bramswig-et-al-2013
DEFB126	Bramswig-et-al-2013
HEPACAM2	Bramswig-et-al-2013
DEPDC6	Bramswig-et-al-2013
LOC643008	Bramswig-et-al-2013
CKMT2	Bramswig-et-al-2013
S100B	Bramswig-et-al-2013
ECT2	Bramswig-et-al-2013
COQ2	Bramswig-et-al-2013
ODF2L	Bramswig-et-al-2013
C19orf21	Bramswig-et-al-2013
MAMLD1	Bramswig-et-al-2013
CPO	Bramswig-et-al-2013
FXYD3	Bramswig-et-al-2013
TTC39A	Bramswig-et-al-2013
OR7G3	Bramswig-et-al-2013
APOO	Bramswig-et-al-2013
A1CF	Bramswig-et-al-2013
NCAPG	Bramswig-et-al-2013
PLD3	Bramswig-et-al-2013
TPH1	Bramswig-et-al-2013
WNT4	Bramswig-et-al-2013
SDC2	Bramswig-et-al-2013
CHI3L2	Bramswig-et-al-2013
GSTA5	Bramswig-et-al-2013
TTC13	Bramswig-et-al-2013
RNASEK	Bramswig-et-al-2013
SYTL5	Bramswig-et-al-2013
FANCI	Bramswig-et-al-2013
ATP8A2	Bramswig-et-al-2013
C10orf122	Bramswig-et-al-2013
CBX6	Bramswig-et-al-2013
PLIN3	Bramswig-et-al-2013
BCAR3	Bramswig-et-al-2013
SUSD1	Bramswig-et-al-2013
NLGN1	Bramswig-et-al-2013
LPAR1	Bramswig-et-al-2013
GRM8	Bramswig-et-al-2013
CNTN4	Bramswig-et-al-2013
WNK3	Bramswig-et-al-2013
IGFL3	Bramswig-et-al-2013
EMB	Bramswig-et-al-2013
C4orf51	Bramswig-et-al-2013
HIST1H2BG	Bramswig-et-al-2013
SLC38A8	Bramswig-et-al-2013
FAM126A	Bramswig-et-al-2013
DPRX	Bramswig-et-al-2013
SLC22A4	Bramswig-et-al-2013
HIST1H2AI	Bramswig-et-al-2013
PDE3B	Bramswig-et-al-2013
GABRB3	Bramswig-et-al-2013
ADCY2	Bramswig-et-al-2013
CDH10	Bramswig-et-al-2013
USP18	Bramswig-et-al-2013
ATCAY	Bramswig-et-al-2013
STAG3L4	Bramswig-et-al-2013
APIP	Bramswig-et-al-2013
VWA5B2	Bramswig-et-al-2013
BAD	Bramswig-et-al-2013
HIST1H3D	Bramswig-et-al-2013
FAM169A	Bramswig-et-al-2013
ADAMTS18	Bramswig-et-al-2013
PKM2	Bramswig-et-al-2013
CACNB2	Bramswig-et-al-2013
PAK3	Bramswig-et-al-2013
C1orf230	Bramswig-et-al-2013
C1orf59	Bramswig-et-al-2013
ZNF321	Bramswig-et-al-2013
RCAN2	Bramswig-et-al-2013
TPX2	Bramswig-et-al-2013
HIST1H2BF	Bramswig-et-al-2013
RCN1	Bramswig-et-al-2013
RHBDD2	Bramswig-et-al-2013
LAT2	Bramswig-et-al-2013
PBX3	Bramswig-et-al-2013
FIGNL1	Bramswig-et-al-2013
ZNF418	Bramswig-et-al-2013
LCLAT1	Bramswig-et-al-2013
TUSC3	Bramswig-et-al-2013
HMGN3	Bramswig-et-al-2013
ST3GAL3	Bramswig-et-al-2013
KLF12	Bramswig-et-al-2013
STMN2	Bramswig-et-al-2013
EGFL7	Bramswig-et-al-2013
STAC	Bramswig-et-al-2013
PRTFDC1	Bramswig-et-al-2013
TSPAN2	Bramswig-et-al-2013
C5orf15	Bramswig-et-al-2013
S100A6	Bramswig-et-al-2013
CCL19	Bramswig-et-al-2013
PPIA	Bramswig-et-al-2013
SMC2	Bramswig-et-al-2013
ZNF382	Bramswig-et-al-2013
ASB4	Bramswig-et-al-2013
VMA21	Bramswig-et-al-2013
MAPK4	Bramswig-et-al-2013
ZNF439	Bramswig-et-al-2013
TCEAL2	Bramswig-et-al-2013
CD63	Bramswig-et-al-2013
ZRSR2	Bramswig-et-al-2013
SGK2	Bramswig-et-al-2013
TMED8	Bramswig-et-al-2013
IFIH1	Bramswig-et-al-2013
FADS2	Bramswig-et-al-2013
C8orf37	Bramswig-et-al-2013
PCDHB4	Bramswig-et-al-2013
MLF1IP	Bramswig-et-al-2013
ST18	Bramswig-et-al-2013
GLIPR2	Bramswig-et-al-2013
C14orf143	Bramswig-et-al-2013
DSCAM	Bramswig-et-al-2013
BCMO1	Bramswig-et-al-2013
APLP1	Bramswig-et-al-2013
CNNM1	Bramswig-et-al-2013
CPNE4	Bramswig-et-al-2013
CEACAM20	Bramswig-et-al-2013
OPHN1	Bramswig-et-al-2013
NPTN	Bramswig-et-al-2013
MAP7D3	Bramswig-et-al-2013
VWA5A	Bramswig-et-al-2013
ST3GAL5	Bramswig-et-al-2013
OSBPL10	Bramswig-et-al-2013
CAPSL	Bramswig-et-al-2013
GDA	Bramswig-et-al-2013
SPAG5	Bramswig-et-al-2013
KRTAP13-2	Bramswig-et-al-2013
AMOT	Bramswig-et-al-2013
SLC5A1	Bramswig-et-al-2013
DEFB134	Bramswig-et-al-2013
NME4	Bramswig-et-al-2013
SIPA1L3	Bramswig-et-al-2013
MARCH4	Bramswig-et-al-2013
MATN2	Bramswig-et-al-2013
C10orf107	Bramswig-et-al-2013
NEDD9	Bramswig-et-al-2013
BAMBI	Bramswig-et-al-2013
GLA	Bramswig-et-al-2013
SLC7A8	Bramswig-et-al-2013
SLAMF9	Bramswig-et-al-2013
GRHL1	Bramswig-et-al-2013
SLC9A6	Bramswig-et-al-2013
MAP3K15	Bramswig-et-al-2013
SSBP2	Bramswig-et-al-2013
HTATSF1	Bramswig-et-al-2013
C16orf45	Bramswig-et-al-2013
KCNJ2	Bramswig-et-al-2013
FAM96B	Bramswig-et-al-2013
ZNF441	Bramswig-et-al-2013
ZNF860	Bramswig-et-al-2013
CTTNBP2	Bramswig-et-al-2013
HIST1H2AE	Bramswig-et-al-2013
TCTN1	Bramswig-et-al-2013
GNG10	Bramswig-et-al-2013
TMEM14A	Bramswig-et-al-2013
ZNF569	Bramswig-et-al-2013
ADAMTSL2	Bramswig-et-al-2013
NUP210L	Bramswig-et-al-2013
FEZ1	Bramswig-et-al-2013
RGS7	Bramswig-et-al-2013
MR1	Bramswig-et-al-2013
FAM184A	Bramswig-et-al-2013
IL1RL2	Bramswig-et-al-2013
KLHL23	Bramswig-et-al-2013
APH1B	Bramswig-et-al-2013
ZCCHC13	Bramswig-et-al-2013
SOX5	Bramswig-et-al-2013
TAS2R30	Bramswig-et-al-2013
OR7C2	Bramswig-et-al-2013
GNG4	Bramswig-et-al-2013
TCTEX1D2	Bramswig-et-al-2013
UBE2QL1	Bramswig-et-al-2013
SYT17	Bramswig-et-al-2013
ANKRD43	Bramswig-et-al-2013
FBXO17	Bramswig-et-al-2013
TOX	Bramswig-et-al-2013
SYNGR4	Bramswig-et-al-2013
IGFBP5	Bramswig-et-al-2013
VIL1	Bramswig-et-al-2013
LRRC24	Bramswig-et-al-2013
STIP1	Bramswig-et-al-2013
DNAJA1	Bramswig-et-al-2013
PCDHB3	Bramswig-et-al-2013
ZNF480	Bramswig-et-al-2013
C6orf192	Bramswig-et-al-2013
ANGEL2	Bramswig-et-al-2013
DEPDC5	Bramswig-et-al-2013
IQCD	Bramswig-et-al-2013
RIC3	Bramswig-et-al-2013
MPDU1	Bramswig-et-al-2013
ACSM5	Bramswig-et-al-2013
YJEFN3	Bramswig-et-al-2013
PIGP	Bramswig-et-al-2013
BNIPL	Bramswig-et-al-2013
SLC24A5	Bramswig-et-al-2013
RAB26	Bramswig-et-al-2013
PSMB3	Bramswig-et-al-2013
CLVS1	Bramswig-et-al-2013
G6PC3	Bramswig-et-al-2013
MTERFD1	Bramswig-et-al-2013
FAM49B	Bramswig-et-al-2013
IP6K2	Bramswig-et-al-2013
ZNF799	Bramswig-et-al-2013
FAM119A	Bramswig-et-al-2013
GPR3	Bramswig-et-al-2013
L2HGDH	Bramswig-et-al-2013
A2ML1	Bramswig-et-al-2013
TPH2	Bramswig-et-al-2013
NCAPD3	Bramswig-et-al-2013
LOC440563	Bramswig-et-al-2013
CDYL	Bramswig-et-al-2013
HEATR3	Bramswig-et-al-2013
NCAPG2	Bramswig-et-al-2013
SCCPDH	Bramswig-et-al-2013
AP4E1	Bramswig-et-al-2013
ZNF182	Bramswig-et-al-2013
UPB1	Bramswig-et-al-2013
KRT34	Bramswig-et-al-2013
NDRG3	Bramswig-et-al-2013
ZNF260	Bramswig-et-al-2013
CHAC2	Bramswig-et-al-2013
SENP8	Bramswig-et-al-2013
UQCR	Bramswig-et-al-2013
PGBD1	Bramswig-et-al-2013
PAQR7	Bramswig-et-al-2013
ZNF266	Bramswig-et-al-2013
HPS1	Bramswig-et-al-2013
SP4	Bramswig-et-al-2013
ITFG3	Bramswig-et-al-2013
FKBP9	Bramswig-et-al-2013
FAM40B	Bramswig-et-al-2013
SIDT1	Bramswig-et-al-2013
SLC25A17	Bramswig-et-al-2013
KIAA1328	Bramswig-et-al-2013
SSX3	Bramswig-et-al-2013
CGRRF1	Bramswig-et-al-2013
GSTA4	Bramswig-et-al-2013
C9orf21	Bramswig-et-al-2013
FASTKD3	Bramswig-et-al-2013
AKIRIN1	Bramswig-et-al-2013
PDS5B	Bramswig-et-al-2013
SMYD3	Bramswig-et-al-2013
DOCK4	Bramswig-et-al-2013
HECTD2	Bramswig-et-al-2013
GDF11	Bramswig-et-al-2013
ASF1B	Bramswig-et-al-2013
RFK	Bramswig-et-al-2013
CADM4	Bramswig-et-al-2013
RNF8	Bramswig-et-al-2013
NME5	Bramswig-et-al-2013
HIST1H2AA	Bramswig-et-al-2013
RABL2A	Bramswig-et-al-2013
ZRANB3	Bramswig-et-al-2013
SRP9	Bramswig-et-al-2013
CCDC19	Bramswig-et-al-2013
KRT2	Bramswig-et-al-2013
WDR35	Bramswig-et-al-2013
ATP5J2	Bramswig-et-al-2013
TUBB1	Bramswig-et-al-2013
CMTM6	Bramswig-et-al-2013
SLC39A3	Bramswig-et-al-2013
C1orf114	Bramswig-et-al-2013
TULP4	Bramswig-et-al-2013
ZNF528	Bramswig-et-al-2013
NPTXR	Bramswig-et-al-2013
TRIM36	Bramswig-et-al-2013
MCM10	Bramswig-et-al-2013
FAM46A	Bramswig-et-al-2013
DCUN1D3	Bramswig-et-al-2013
ZNF573	Bramswig-et-al-2013
CD83	Bramswig-et-al-2013
LILRA5	Bramswig-et-al-2013
ERH	Bramswig-et-al-2013
C10orf35	Bramswig-et-al-2013
PLB1	Bramswig-et-al-2013
EXTL3	Bramswig-et-al-2013
C6orf125	Bramswig-et-al-2013
LOC81691	Bramswig-et-al-2013
SNED1	Bramswig-et-al-2013
WNT2B	Bramswig-et-al-2013
ATPIF1	Bramswig-et-al-2013
CALCOCO2	Bramswig-et-al-2013
NUCB1	Bramswig-et-al-2013
GTF2H5	Bramswig-et-al-2013
SLC2A4RG	Bramswig-et-al-2013
NAT11	Bramswig-et-al-2013
ZNF154	Bramswig-et-al-2013
S100PBP	Bramswig-et-al-2013
TMEM117	Bramswig-et-al-2013
DYX1C1	Bramswig-et-al-2013
CCDC153	Bramswig-et-al-2013
CST4	Bramswig-et-al-2013
MOCS2	Bramswig-et-al-2013
CEACAM19	Bramswig-et-al-2013
FAM20C	Bramswig-et-al-2013
PPP5C	Bramswig-et-al-2013
NEURL1B	Bramswig-et-al-2013
C17orf49	Bramswig-et-al-2013
PDZD7	Bramswig-et-al-2013
AIFM1	Bramswig-et-al-2013
UVRAG	Bramswig-et-al-2013
CCDC24	Bramswig-et-al-2013
DMGDH	Bramswig-et-al-2013
SCGB1A1	Bramswig-et-al-2013
SUMF1	Bramswig-et-al-2013
ICMT	Bramswig-et-al-2013
C2orf43	Bramswig-et-al-2013
PPP2R4	Bramswig-et-al-2013
LY6G5C	Bramswig-et-al-2013
BBS5	Bramswig-et-al-2013
METTL14	Bramswig-et-al-2013
PSMB5	Bramswig-et-al-2013
FUCA2	Bramswig-et-al-2013
MORN4	Bramswig-et-al-2013
TPK1	Bramswig-et-al-2013
ZWINT	Bramswig-et-al-2013
ATG10	Bramswig-et-al-2013
CFL1	Bramswig-et-al-2013
NBPF3	Bramswig-et-al-2013
PRUNE	Bramswig-et-al-2013
FGFR1OP	Bramswig-et-al-2013
PSG2	Bramswig-et-al-2013
BIN2	Bramswig-et-al-2013
VPS41	Bramswig-et-al-2013
NT5M	Bramswig-et-al-2013
RFPL3	Bramswig-et-al-2013
NAV3	Bramswig-et-al-2013
C14orf159	Bramswig-et-al-2013
ACAA2	Bramswig-et-al-2013
DNAJC25-GNG10	Bramswig-et-al-2013
ETFDH	Bramswig-et-al-2013
REV3L	Bramswig-et-al-2013
CHEK1	Bramswig-et-al-2013
ZNF737	Bramswig-et-al-2013
WDFY3	Bramswig-et-al-2013
ANAPC11	Bramswig-et-al-2013
CEP97	Bramswig-et-al-2013
C5orf25	Bramswig-et-al-2013
SMAP2	Bramswig-et-al-2013
ZNF415	Bramswig-et-al-2013
ZKSCAN3	Bramswig-et-al-2013
NDUFAF3	Bramswig-et-al-2013
THOP1	Bramswig-et-al-2013
ALKBH6	Bramswig-et-al-2013
OCM2	Bramswig-et-al-2013
OR2T11	Bramswig-et-al-2013
NOVA2	Bramswig-et-al-2013
PLEKHB2	Bramswig-et-al-2013
XRCC6	Bramswig-et-al-2013
FAM170A	Bramswig-et-al-2013
C8orf55	Bramswig-et-al-2013
NIPSNAP3A	Bramswig-et-al-2013
PPP1R3F	Bramswig-et-al-2013
CRABP2	Bramswig-et-al-2013
DCAF6	Bramswig-et-al-2013
GPHB5	Bramswig-et-al-2013
RBX1	Bramswig-et-al-2013
RBM4	Bramswig-et-al-2013
DYNC2H1	Bramswig-et-al-2013
LRRC27	Bramswig-et-al-2013
ZNF443	Bramswig-et-al-2013
GTF2I	Bramswig-et-al-2013
NDUFAB1	Bramswig-et-al-2013
PROX1	Bramswig-et-al-2013
TBCB	Bramswig-et-al-2013
MUM1	Bramswig-et-al-2013
SFXN1	Bramswig-et-al-2013
DGAT2	Bramswig-et-al-2013
MFSD3	Bramswig-et-al-2013
MRPL35	Bramswig-et-al-2013
FBXO5	Bramswig-et-al-2013
PIK3C2B	Bramswig-et-al-2013
RIBC1	Bramswig-et-al-2013
HCN3	Bramswig-et-al-2013
ZSCAN5B	Bramswig-et-al-2013
TTC25	Bramswig-et-al-2013
CALR3	Bramswig-et-al-2013
LLGL1	Bramswig-et-al-2013
ZNF77	Bramswig-et-al-2013
SLC39A1	Bramswig-et-al-2013
DCDC2B	Bramswig-et-al-2013
ZNF721	Bramswig-et-al-2013
PECR	Bramswig-et-al-2013
SLC25A14	Bramswig-et-al-2013
N6AMT2	Bramswig-et-al-2013
GNB5	Bramswig-et-al-2013
WASF1	Bramswig-et-al-2013
ZNF776	Bramswig-et-al-2013
HS6ST2	Bramswig-et-al-2013
NIPSNAP1	Bramswig-et-al-2013
SEC61A2	Bramswig-et-al-2013
ANKS1B	Bramswig-et-al-2013
C17orf57	Bramswig-et-al-2013
ZNF586	Bramswig-et-al-2013
LPGAT1	Bramswig-et-al-2013
RARRES3	Bramswig-et-al-2013
TFDP1	Bramswig-et-al-2013
ID4	Bramswig-et-al-2013
INO80E	Bramswig-et-al-2013
MYO16	Bramswig-et-al-2013
ADAL	Bramswig-et-al-2013
FIG4	Bramswig-et-al-2013
GPR137B	Bramswig-et-al-2013
PIP5K1A	Bramswig-et-al-2013
ZNF41	Bramswig-et-al-2013
UPLP	Bramswig-et-al-2013
PVR	Bramswig-et-al-2013
TCN2	Bramswig-et-al-2013
ASTN1	Bramswig-et-al-2013
ABCC5	Bramswig-et-al-2013
ZNF426	Bramswig-et-al-2013
BSG	Bramswig-et-al-2013
SH3BP5	Bramswig-et-al-2013
PSMB8	Bramswig-et-al-2013
PRPSAP2	Bramswig-et-al-2013
ELOVL5	Bramswig-et-al-2013
SAPS2	Bramswig-et-al-2013
CD47	Bramswig-et-al-2013
LMAN2L	Bramswig-et-al-2013
MRPL13	Bramswig-et-al-2013
PRMT1	Bramswig-et-al-2013
BEND5	Bramswig-et-al-2013
MTCH2	Bramswig-et-al-2013
HNF1A	Bramswig-et-al-2013
FAM20A	Bramswig-et-al-2013
TP53I13	Bramswig-et-al-2013
FBN1	Bramswig-et-al-2013
PPP2R5C	Bramswig-et-al-2013
SNRPD3	Bramswig-et-al-2013
KCNK18	Bramswig-et-al-2013
IMPA1	Bramswig-et-al-2013
NPAS3	Bramswig-et-al-2013
TCL1A	Bramswig-et-al-2013
PEX11B	Bramswig-et-al-2013
GRAMD2	Bramswig-et-al-2013
ANP32E	Bramswig-et-al-2013
GSK3A	Bramswig-et-al-2013
C17orf100	Bramswig-et-al-2013
ZFP90	Bramswig-et-al-2013
LEPROTL1	Bramswig-et-al-2013
ARHGAP1	Bramswig-et-al-2013
CCDC122	Bramswig-et-al-2013
VWA3A	Bramswig-et-al-2013
CLOCK	Bramswig-et-al-2013
HYLS1	Bramswig-et-al-2013
DPP7	Bramswig-et-al-2013
AMELX	Bramswig-et-al-2013
SERPINA6	Bramswig-et-al-2013
MUDENG	Bramswig-et-al-2013
DYNC2LI1	Bramswig-et-al-2013
C16orf62	Bramswig-et-al-2013
RAB7L1	Bramswig-et-al-2013
C1GALT1C1	Bramswig-et-al-2013
MFSD11	Bramswig-et-al-2013
CDC7	Bramswig-et-al-2013
CENPQ	Bramswig-et-al-2013
FIBP	Bramswig-et-al-2013
KBTBD3	Bramswig-et-al-2013
ALG8	Bramswig-et-al-2013
RACGAP1	Bramswig-et-al-2013
ZMYM3	Bramswig-et-al-2013
KIF27	Bramswig-et-al-2013
SETMAR	Bramswig-et-al-2013
CLSTN2	Bramswig-et-al-2013
ZNF567	Bramswig-et-al-2013
LPPR2	Bramswig-et-al-2013
RETN	Bramswig-et-al-2013
KIF2C	Bramswig-et-al-2013
FANCD2	Bramswig-et-al-2013
C14orf1	Bramswig-et-al-2013
ULK4	Bramswig-et-al-2013
LSM4	Bramswig-et-al-2013
NENF	Bramswig-et-al-2013
REEP1	Bramswig-et-al-2013
BPNT1	Bramswig-et-al-2013
COX8A	Bramswig-et-al-2013
CST1	Bramswig-et-al-2013
ZDHHC21	Bramswig-et-al-2013
PIGT	Bramswig-et-al-2013
TYMS	Bramswig-et-al-2013
KNTC1	Bramswig-et-al-2013
RPAP3	Bramswig-et-al-2013
ZBTB41	Bramswig-et-al-2013
NDUFC1	Bramswig-et-al-2013
KIAA1009	Bramswig-et-al-2013
C2orf74	Bramswig-et-al-2013
HJURP	Bramswig-et-al-2013
SLC37A4	Bramswig-et-al-2013
COMMD1	Bramswig-et-al-2013
SOX15	Bramswig-et-al-2013
SMARCA2	Bramswig-et-al-2013
APOA1BP	Bramswig-et-al-2013
AP2M1	Bramswig-et-al-2013
KIAA1324L	Bramswig-et-al-2013
KLRAQ1	Bramswig-et-al-2013
GSTCD	Bramswig-et-al-2013
TSGA10	Bramswig-et-al-2013
C14orf156	Bramswig-et-al-2013
ISCA1	Bramswig-et-al-2013
TIPIN	Bramswig-et-al-2013
ZNF625	Bramswig-et-al-2013
TMEM38A	Bramswig-et-al-2013
PDIK1L	Bramswig-et-al-2013
HYAL2	Bramswig-et-al-2013
PIGW	Bramswig-et-al-2013
CFI	Bramswig-et-al-2013
KIF12	Bramswig-et-al-2013
C11orf60	Bramswig-et-al-2013
KIAA0895	Bramswig-et-al-2013
IDI1	Bramswig-et-al-2013
ISYNA1	Bramswig-et-al-2013
C12orf24	Bramswig-et-al-2013
PIP4K2B	Bramswig-et-al-2013
ZNF814	Bramswig-et-al-2013
RAB3GAP2	Bramswig-et-al-2013
KLHL22	Bramswig-et-al-2013
BOC	Bramswig-et-al-2013
LSMD1	Bramswig-et-al-2013
KRT24	Bramswig-et-al-2013
DDAH2	Bramswig-et-al-2013
MAP2K6	Bramswig-et-al-2013
LINS1	Bramswig-et-al-2013
ALAS1	Bramswig-et-al-2013
PGCP	Bramswig-et-al-2013
INTS2	Bramswig-et-al-2013
SPG20	Bramswig-et-al-2013
CNKSR3	Bramswig-et-al-2013
ATP2B1	Bramswig-et-al-2013
C1GALT1	Bramswig-et-al-2013
WFDC2	Bramswig-et-al-2013
CHST7	Bramswig-et-al-2013
LYRM5	Bramswig-et-al-2013
KIF13A	Bramswig-et-al-2013
ORC1L	Bramswig-et-al-2013
CYB561D2	Bramswig-et-al-2013
NDUFB3	Bramswig-et-al-2013
RNASEH2A	Bramswig-et-al-2013
PI4KB	Bramswig-et-al-2013
TPST1	Bramswig-et-al-2013
ARSG	Bramswig-et-al-2013
TRIM3	Bramswig-et-al-2013
INTS7	Bramswig-et-al-2013
FAM120C	Bramswig-et-al-2013
DCUN1D2	Bramswig-et-al-2013
TTC23L	Bramswig-et-al-2013
TMED1	Bramswig-et-al-2013
GPER	Bramswig-et-al-2013
HIST2H2AA3	Bramswig-et-al-2013
HIST2H2AA4	Bramswig-et-al-2013
ZNF283	Bramswig-et-al-2013
WRB	Bramswig-et-al-2013
ATXN7L1	Bramswig-et-al-2013
C5orf42	Bramswig-et-al-2013
ARL3	Bramswig-et-al-2013
C10orf28	Bramswig-et-al-2013
ASPH	Bramswig-et-al-2013
DYNLRB1	Bramswig-et-al-2013
C20orf152	Bramswig-et-al-2013
LIPG	Bramswig-et-al-2013
ZNF461	Bramswig-et-al-2013
C14orf148	Bramswig-et-al-2013
DOPEY2	Bramswig-et-al-2013
IFT74	Bramswig-et-al-2013
MCHR1	Bramswig-et-al-2013
NRP1	Bramswig-et-al-2013
NUDT14	Bramswig-et-al-2013
C20orf108	Bramswig-et-al-2013
TAF1B	Bramswig-et-al-2013
FAM189A1	Bramswig-et-al-2013
R3HDM1	Bramswig-et-al-2013
PIGX	Bramswig-et-al-2013
USP13	Bramswig-et-al-2013
ZFP112	Bramswig-et-al-2013
ELOVL6	Bramswig-et-al-2013
GPI	Bramswig-et-al-2013
ITPK1	Bramswig-et-al-2013
ACTR1A	Bramswig-et-al-2013
MYEF2	Bramswig-et-al-2013
ZNF75A	Bramswig-et-al-2013
C21orf63	Bramswig-et-al-2013
BIRC5	Bramswig-et-al-2013
PSMD8	Bramswig-et-al-2013
PAK6	Bramswig-et-al-2013
ITLN1	Bramswig-et-al-2013
ZNF251	Bramswig-et-al-2013
MRPL42	Bramswig-et-al-2013
SELT	Bramswig-et-al-2013
LRCH3	Bramswig-et-al-2013
MYL4	Bramswig-et-al-2013
UTY	Bramswig-et-al-2013
RASSF4	Bramswig-et-al-2013
SCHIP1	Bramswig-et-al-2013
C12orf76	Bramswig-et-al-2013
EPHB1	Bramswig-et-al-2013
ZNF491	Bramswig-et-al-2013
ZNF223	Bramswig-et-al-2013
PRKAG3	Bramswig-et-al-2013
C4orf33	Bramswig-et-al-2013
TGM4	Bramswig-et-al-2013
MRPL28	Bramswig-et-al-2013
C1orf210	Bramswig-et-al-2013
ZNF17	Bramswig-et-al-2013
SLC6A19	Bramswig-et-al-2013
RNF128	Bramswig-et-al-2013
HSPC159	Bramswig-et-al-2013
LIPC	Bramswig-et-al-2013
RABL2B	Bramswig-et-al-2013
PSMB6	Bramswig-et-al-2013
ZNF660	Bramswig-et-al-2013
PTK7	Bramswig-et-al-2013
POU6F2	Bramswig-et-al-2013
C12orf41	Bramswig-et-al-2013
ZNF473	Bramswig-et-al-2013
RAB34	Bramswig-et-al-2013
C2orf44	Bramswig-et-al-2013
SELI	Bramswig-et-al-2013
FREQ	Bramswig-et-al-2013
CHEK2	Bramswig-et-al-2013
C20orf43	Bramswig-et-al-2013
CABYR	Bramswig-et-al-2013
KIAA0232	Bramswig-et-al-2013
SV2C	Bramswig-et-al-2013
SYNPO	Bramswig-et-al-2013
CKLF	Bramswig-et-al-2013
MMP15	Bramswig-et-al-2013
ATXN10	Bramswig-et-al-2013
CCDC123	Bramswig-et-al-2013
TTLL13	Bramswig-et-al-2013
C7orf50	Bramswig-et-al-2013
HSD17B3	Bramswig-et-al-2013
ANP32C	Bramswig-et-al-2013
DNMT1	Bramswig-et-al-2013
FSD1L	Bramswig-et-al-2013
ANAPC10	Bramswig-et-al-2013
HRASLS	Bramswig-et-al-2013
KIF20A	Bramswig-et-al-2013
ZFP1	Bramswig-et-al-2013
HADHB	Bramswig-et-al-2013
PTS	Bramswig-et-al-2013
VPREB3	Bramswig-et-al-2013
CRYM	Bramswig-et-al-2013
RABL5	Bramswig-et-al-2013
C6orf186	Bramswig-et-al-2013
ABLIM1	Bramswig-et-al-2013
MPHOSPH6	Bramswig-et-al-2013
C14orf142	Bramswig-et-al-2013
C19orf41	Bramswig-et-al-2013
RAET1L	Bramswig-et-al-2013
PDE6H	Bramswig-et-al-2013
C15orf23	Bramswig-et-al-2013
RNF145	Bramswig-et-al-2013
CCDC86	Bramswig-et-al-2013
HKR1	Bramswig-et-al-2013
SSTR1	Bramswig-et-al-2013
PRKAR1B	Bramswig-et-al-2013
SNTA1	Bramswig-et-al-2013
EIF2C3	Bramswig-et-al-2013
PTPN13	Bramswig-et-al-2013
CHPF2	Bramswig-et-al-2013
USP45	Bramswig-et-al-2013
GPSM3	Bramswig-et-al-2013
AASDH	Bramswig-et-al-2013
WDR66	Bramswig-et-al-2013
PRPF3	Bramswig-et-al-2013
PAFAH1B3	Bramswig-et-al-2013
GABBR1	Bramswig-et-al-2013
UQCC	Bramswig-et-al-2013
PCNA	Bramswig-et-al-2013
KDELC1	Bramswig-et-al-2013
SLC25A20	Bramswig-et-al-2013
DCK	Bramswig-et-al-2013
LEO1	Bramswig-et-al-2013
GINS2	Bramswig-et-al-2013
KLRG2	Bramswig-et-al-2013
TRIM55	Bramswig-et-al-2013
NT5C3	Bramswig-et-al-2013
TUBGCP4	Bramswig-et-al-2013
ARNT2	Bramswig-et-al-2013
DLG4	Bramswig-et-al-2013
CHRNA5	Bramswig-et-al-2013
AXIN2	Bramswig-et-al-2013
PTTG1	Bramswig-et-al-2013
PARP9	Bramswig-et-al-2013
PLCD4	Bramswig-et-al-2013
KDELR1	Bramswig-et-al-2013
APOBEC3C	Bramswig-et-al-2013
TTLL3	Bramswig-et-al-2013
C1orf84	Bramswig-et-al-2013
PXK	Bramswig-et-al-2013
MED27	Bramswig-et-al-2013
NFU1	Bramswig-et-al-2013
KCTD6	Bramswig-et-al-2013
BMPR1A	Bramswig-et-al-2013
TGOLN2	Bramswig-et-al-2013
SEZ6	Bramswig-et-al-2013
C2orf28	Bramswig-et-al-2013
HNRNPCL1	Bramswig-et-al-2013
NKIRAS1	Bramswig-et-al-2013
LOC375190	Bramswig-et-al-2013
TMEM205	Bramswig-et-al-2013
RBM8A	Bramswig-et-al-2013
SPTBN4	Bramswig-et-al-2013
FGFR4	Bramswig-et-al-2013
FAM71F2	Bramswig-et-al-2013
MRPL1	Bramswig-et-al-2013
ZNF180	Bramswig-et-al-2013
ARL2	Bramswig-et-al-2013
CNTF	Bramswig-et-al-2013
NUPL2	Bramswig-et-al-2013
AQP6	Bramswig-et-al-2013
HEXA	Bramswig-et-al-2013
PPIL6	Bramswig-et-al-2013
BHLHB9	Bramswig-et-al-2013
SPG21	Bramswig-et-al-2013
ZNF816A	Bramswig-et-al-2013
FGFR1	Bramswig-et-al-2013
POMGNT1	Bramswig-et-al-2013
CXorf23	Bramswig-et-al-2013
ODZ4	Bramswig-et-al-2013
C5orf49	Bramswig-et-al-2013
ERMP1	Bramswig-et-al-2013
C6orf26	Bramswig-et-al-2013
C1orf74	Bramswig-et-al-2013
BEX5	Bramswig-et-al-2013
PFTK2	Bramswig-et-al-2013
TLCD1	Bramswig-et-al-2013
ADCY1	Bramswig-et-al-2013
NUDT10	Bramswig-et-al-2013
MTERFD3	Bramswig-et-al-2013
COMMD9	Bramswig-et-al-2013
RPGRIP1L	Bramswig-et-al-2013
PLEKHA2	Bramswig-et-al-2013
C22orf15	Bramswig-et-al-2013
STMN1	Bramswig-et-al-2013
ATP5G3	Bramswig-et-al-2013
MMAB	Bramswig-et-al-2013
B4GALNT3	Bramswig-et-al-2013
C14orf135	Bramswig-et-al-2013
ARSK	Bramswig-et-al-2013
GPR114	Bramswig-et-al-2013
CDC42	Bramswig-et-al-2013
CKAP2	Bramswig-et-al-2013
LOC649330	Bramswig-et-al-2013
C9orf68	Bramswig-et-al-2013
KCND3	Bramswig-et-al-2013
SNRPB	Bramswig-et-al-2013
SPOCK2	Bramswig-et-al-2013
SIRPD	Bramswig-et-al-2013
ENTPD6	Bramswig-et-al-2013
FAM160A2	Bramswig-et-al-2013
SLC14A2	Bramswig-et-al-2013
CA5A	Bramswig-et-al-2013
PRKAG2	Bramswig-et-al-2013
MAOB	Bramswig-et-al-2013
FUNDC1	Bramswig-et-al-2013
GOLT1A	Bramswig-et-al-2013
TIMELESS	Bramswig-et-al-2013
PROKR2	Bramswig-et-al-2013
ACOT7	Bramswig-et-al-2013
GPLD1	Bramswig-et-al-2013
CLUAP1	Bramswig-et-al-2013
SARNP	Bramswig-et-al-2013
B3GALT2	Bramswig-et-al-2013
JRK	Bramswig-et-al-2013
ADAM22	Bramswig-et-al-2013
TMEM63B	Bramswig-et-al-2013
DHDH	Bramswig-et-al-2013
MTM1	Bramswig-et-al-2013
DCBLD2	Bramswig-et-al-2013
ZNF81	Bramswig-et-al-2013
B3GALNT1	Bramswig-et-al-2013
MEAF6	Bramswig-et-al-2013
C17orf60	Bramswig-et-al-2013
C20orf70	Bramswig-et-al-2013
KCNC2	Bramswig-et-al-2013
ATP5G1	Bramswig-et-al-2013
C13orf28	Bramswig-et-al-2013
SPATS1	Bramswig-et-al-2013
SERPINA11	Bramswig-et-al-2013
CAPN3	Bramswig-et-al-2013
CEACAM1	Bramswig-et-al-2013
SLC44A5	Bramswig-et-al-2013
CBX5	Bramswig-et-al-2013
GSS	Bramswig-et-al-2013
SYNRG	Bramswig-et-al-2013
HCP5	Bramswig-et-al-2013
UROS	Bramswig-et-al-2013
NAT5	Bramswig-et-al-2013
PLA2G16	Bramswig-et-al-2013
VPS45	Bramswig-et-al-2013
BHMT2	Bramswig-et-al-2013
MAP1LC3C	Bramswig-et-al-2013
CCDC106	Bramswig-et-al-2013
ADRB2	Bramswig-et-al-2013
TMEM9	Bramswig-et-al-2013
GDAP1L1	Bramswig-et-al-2013
ALDH5A1	Bramswig-et-al-2013
ZNF577	Bramswig-et-al-2013
NTNG1	Bramswig-et-al-2013
MKKS	Bramswig-et-al-2013
C1orf124	Bramswig-et-al-2013
GRINA	Bramswig-et-al-2013
HSBP1	Bramswig-et-al-2013
ZBED5	Bramswig-et-al-2013
R3HDM2	Bramswig-et-al-2013
KCNRG	Bramswig-et-al-2013
RQCD1	Bramswig-et-al-2013
ZNF713	Bramswig-et-al-2013
RAD1	Bramswig-et-al-2013
CACNG4	Bramswig-et-al-2013
POLR3GL	Bramswig-et-al-2013
DNASE1L3	Bramswig-et-al-2013
PCYOX1L	Bramswig-et-al-2013
RPS17	Bramswig-et-al-2013
PYGB	Bramswig-et-al-2013
TCEAL3	Bramswig-et-al-2013
ROR1	Bramswig-et-al-2013
THYN1	Bramswig-et-al-2013
BRP44	Bramswig-et-al-2013
C17orf81	Bramswig-et-al-2013
ABLIM2	Bramswig-et-al-2013
C1orf96	Bramswig-et-al-2013
CTSZ	Bramswig-et-al-2013
KRTAP21-2	Bramswig-et-al-2013
SEMA5A	Bramswig-et-al-2013
C17orf108	Bramswig-et-al-2013
NOP16	Bramswig-et-al-2013
FAH	Bramswig-et-al-2013
SAMD9	Bramswig-et-al-2013
VBP1	Bramswig-et-al-2013
MGAM	Bramswig-et-al-2013
SCFD2	Bramswig-et-al-2013
CRY1	Bramswig-et-al-2013
TAPBPL	Bramswig-et-al-2013
SCP2	Bramswig-et-al-2013
NR4A1	Bramswig-et-al-2013
RABIF	Bramswig-et-al-2013
TRAPPC9	Bramswig-et-al-2013
TCEAL4	Bramswig-et-al-2013
SLC12A6	Bramswig-et-al-2013
LAPTM4B	Bramswig-et-al-2013
GFOD2	Bramswig-et-al-2013
ZNF320	Bramswig-et-al-2013
AVPR1B	Bramswig-et-al-2013
ZNF570	Bramswig-et-al-2013
FAM21C	Bramswig-et-al-2013
TRNP1	Bramswig-et-al-2013
RPS26	Bramswig-et-al-2013
ENOX1	Bramswig-et-al-2013
C7orf59	Bramswig-et-al-2013
TCEANC	Bramswig-et-al-2013
ZNF620	Bramswig-et-al-2013
RUFY1	Bramswig-et-al-2013
ANAPC7	Bramswig-et-al-2013
ACE	Bramswig-et-al-2013
PRR19	Bramswig-et-al-2013
CRYGA	Bramswig-et-al-2013
ZC3HAV1L	Bramswig-et-al-2013
ADCY6	Bramswig-et-al-2013
C6orf211	Bramswig-et-al-2013
TMEM86B	Bramswig-et-al-2013
MAD2L1	Bramswig-et-al-2013
KRTAP19-3	Bramswig-et-al-2013
PARD6A	Bramswig-et-al-2013
PRDX3	Bramswig-et-al-2013
ORM2	Bramswig-et-al-2013
SPATA7	Bramswig-et-al-2013
ACYP1	Bramswig-et-al-2013
MITD1	Bramswig-et-al-2013
NDUFA13	Bramswig-et-al-2013
SDK1	Bramswig-et-al-2013
LGALS13	Bramswig-et-al-2013
RAD51C	Bramswig-et-al-2013
C12orf68	Bramswig-et-al-2013
ZNF675	Bramswig-et-al-2013
C6orf25	Bramswig-et-al-2013
EXOG	Bramswig-et-al-2013
NDUFB2	Bramswig-et-al-2013
FKBP2	Bramswig-et-al-2013
VPS37D	Bramswig-et-al-2013
LOC642587	Bramswig-et-al-2013
ZFAND2B	Bramswig-et-al-2013
SLC8A2	Bramswig-et-al-2013
UBE2A	Bramswig-et-al-2013
RGAG4	Bramswig-et-al-2013
HSF2	Bramswig-et-al-2013
ZNF761	Bramswig-et-al-2013
MANEA	Bramswig-et-al-2013
NT5DC3	Bramswig-et-al-2013
STXBP4	Bramswig-et-al-2013
POLR2J	Bramswig-et-al-2013
DAPK2	Bramswig-et-al-2013
EWSR1	Bramswig-et-al-2013
PDHB	Bramswig-et-al-2013
CLDN20	Bramswig-et-al-2013
ABHD6	Bramswig-et-al-2013
ZNF594	Bramswig-et-al-2013
DENND1A	Bramswig-et-al-2013
NPSR1	Bramswig-et-al-2013
GIPC1	Bramswig-et-al-2013
MTMR11	Bramswig-et-al-2013
VPS25	Bramswig-et-al-2013
CD164	Bramswig-et-al-2013
DAO	Bramswig-et-al-2013
CAPZB	Bramswig-et-al-2013
TDRD9	Bramswig-et-al-2013
INPP5D	Bramswig-et-al-2013
NBEAL2	Bramswig-et-al-2013
C14orf37	Bramswig-et-al-2013
EFNB3	Bramswig-et-al-2013
RDH12	Bramswig-et-al-2013
DNAL1	Bramswig-et-al-2013
IL2RG	Bramswig-et-al-2013
PPP1R9A	Bramswig-et-al-2013
RALGPS1	Bramswig-et-al-2013
MOGAT2	Bramswig-et-al-2013
HEATR4	Bramswig-et-al-2013
CCDC55	Bramswig-et-al-2013
ARMCX1	Bramswig-et-al-2013
FLRT3	Bramswig-et-al-2013
PLS1	Bramswig-et-al-2013
SLC6A16	Bramswig-et-al-2013
A1CF	Blodgett-et-al-2015
AB074188	Blodgett-et-al-2015
ABHD14A	Blodgett-et-al-2015
ABHD15	Blodgett-et-al-2015
AF070581	Blodgett-et-al-2015
AFP	Blodgett-et-al-2015
AK022915	Blodgett-et-al-2015
AK123675	Blodgett-et-al-2015
AK125051	Blodgett-et-al-2015
AKAP12	Blodgett-et-al-2015
AL109792	Blodgett-et-al-2015
AL831977	Blodgett-et-al-2015
ALDH1B1	Blodgett-et-al-2015
ALYREF	Blodgett-et-al-2015
AMBP	Blodgett-et-al-2015
ANK2	Blodgett-et-al-2015
ANXA4	Blodgett-et-al-2015
AP1G1	Blodgett-et-al-2015
AP2S1	Blodgett-et-al-2015
APBB1	Blodgett-et-al-2015
APLP1	Blodgett-et-al-2015
APOA1	Blodgett-et-al-2015
APOC1	Blodgett-et-al-2015
APOC3	Blodgett-et-al-2015
APOH	Blodgett-et-al-2015
ARF5	Blodgett-et-al-2015
ARGLU1	Blodgett-et-al-2015
ARHGEF28	Blodgett-et-al-2015
ARL5B	Blodgett-et-al-2015
ARRDC4	Blodgett-et-al-2015
ARX	Blodgett-et-al-2015
ASS1	Blodgett-et-al-2015
ASXL3	Blodgett-et-al-2015
ATF6	Blodgett-et-al-2015
ATP2B1	Blodgett-et-al-2015
ATP2B4	Blodgett-et-al-2015
ATXN7L1	Blodgett-et-al-2015
AURKAIP1	Blodgett-et-al-2015
BAD	Blodgett-et-al-2015
BAMBI	Blodgett-et-al-2015
BCAR1	Blodgett-et-al-2015
BCL2L2-PABPN1	Blodgett-et-al-2015
BIRC6	Blodgett-et-al-2015
BSCL2	Blodgett-et-al-2015
BSG	Blodgett-et-al-2015
BTAF1	Blodgett-et-al-2015
BTBD11	Blodgett-et-al-2015
BTG1	Blodgett-et-al-2015
C11orf31	Blodgett-et-al-2015
C14orf1	Blodgett-et-al-2015
C19orf77	Blodgett-et-al-2015
C1orf198	Blodgett-et-al-2015
C1orf210	Blodgett-et-al-2015
C5orf38	Blodgett-et-al-2015
C7orf43	Blodgett-et-al-2015
CACNA1A	Blodgett-et-al-2015
CACNB2	Blodgett-et-al-2015
CALY	Blodgett-et-al-2015
CAMTA1	Blodgett-et-al-2015
CAPZA1	Blodgett-et-al-2015
CBFA2T2	Blodgett-et-al-2015
CBX6	Blodgett-et-al-2015
CCDC86	Blodgett-et-al-2015
CCNL1	Blodgett-et-al-2015
CDC42EP4	Blodgett-et-al-2015
CDH1	Blodgett-et-al-2015
CDK10	Blodgett-et-al-2015
CDO1	Blodgett-et-al-2015
CEP85L	Blodgett-et-al-2015
CERCAM	Blodgett-et-al-2015
CERS1	Blodgett-et-al-2015
CHGA	Blodgett-et-al-2015
CHKA	Blodgett-et-al-2015
CHKB	Blodgett-et-al-2015
CLIC1	Blodgett-et-al-2015
CLU	Blodgett-et-al-2015
CMTM6	Blodgett-et-al-2015
CNOT2	Blodgett-et-al-2015
CNTN4	Blodgett-et-al-2015
COL27A1	Blodgett-et-al-2015
COPE	Blodgett-et-al-2015
COPS3	Blodgett-et-al-2015
CREM	Blodgett-et-al-2015
CRIP1	Blodgett-et-al-2015
CRYBA2	Blodgett-et-al-2015
CSGALNACT1	Blodgett-et-al-2015
CST3	Blodgett-et-al-2015
CTNND1	Blodgett-et-al-2015
CTNND2	Blodgett-et-al-2015
CXorf40A	Blodgett-et-al-2015
CXorf40B	Blodgett-et-al-2015
CYB5D1	Blodgett-et-al-2015
CYCS	Blodgett-et-al-2015
CYTH1	Blodgett-et-al-2015
DACH1	Blodgett-et-al-2015
DCAF6	Blodgett-et-al-2015
DCC	Blodgett-et-al-2015
DCUN1D3	Blodgett-et-al-2015
DDAH1	Blodgett-et-al-2015
DDC	Blodgett-et-al-2015
DDX52	Blodgett-et-al-2015
DERA	Blodgett-et-al-2015
DHX15	Blodgett-et-al-2015
DKFZp586B1922	Blodgett-et-al-2015
DMD	Blodgett-et-al-2015
DNPH1	Blodgett-et-al-2015
DOPEY2	Blodgett-et-al-2015
DOT1L	Blodgett-et-al-2015
DPP4	Blodgett-et-al-2015
DQ583756	Blodgett-et-al-2015
DSC2	Blodgett-et-al-2015
DUSP12	Blodgett-et-al-2015
DYNLT1	Blodgett-et-al-2015
ECH1	Blodgett-et-al-2015
EDC4	Blodgett-et-al-2015
EFNB3	Blodgett-et-al-2015
EIF4A3	Blodgett-et-al-2015
EIF5	Blodgett-et-al-2015
EIF5A	Blodgett-et-al-2015
ELF1	Blodgett-et-al-2015
ELF2	Blodgett-et-al-2015
ELL2	Blodgett-et-al-2015
EMC10	Blodgett-et-al-2015
ENPP1	Blodgett-et-al-2015
ENSA	Blodgett-et-al-2015
ERGIC3	Blodgett-et-al-2015
ESRRG	Blodgett-et-al-2015
EXOSC10	Blodgett-et-al-2015
EZR	Blodgett-et-al-2015
F10	Blodgett-et-al-2015
F11R	Blodgett-et-al-2015
FABP1	Blodgett-et-al-2015
FABP5	Blodgett-et-al-2015
FAM107B	Blodgett-et-al-2015
FAM110B	Blodgett-et-al-2015
FAM131C	Blodgett-et-al-2015
FAM195B	Blodgett-et-al-2015
FAM46A	Blodgett-et-al-2015
FBLL1	Blodgett-et-al-2015
FBRSL1	Blodgett-et-al-2015
FBXL5	Blodgett-et-al-2015
FBXO9	Blodgett-et-al-2015
FCHSD2	Blodgett-et-al-2015
FEV	Blodgett-et-al-2015
FNTA	Blodgett-et-al-2015
FRS2	Blodgett-et-al-2015
FXYD3	Blodgett-et-al-2015
FXYD5	Blodgett-et-al-2015
FXYD6	Blodgett-et-al-2015
G6PC3	Blodgett-et-al-2015
GAA	Blodgett-et-al-2015
GAB1	Blodgett-et-al-2015
GATM	Blodgett-et-al-2015
GATSL2	Blodgett-et-al-2015
GC	Blodgett-et-al-2015
GCG	Blodgett-et-al-2015
GCH1	Blodgett-et-al-2015
GCNT1	Blodgett-et-al-2015
GFOD2	Blodgett-et-al-2015
GLI3	Blodgett-et-al-2015
GLS	Blodgett-et-al-2015
GNAI1	Blodgett-et-al-2015
GNB2	Blodgett-et-al-2015
GNG10	Blodgett-et-al-2015
GNG5	Blodgett-et-al-2015
GPC6	Blodgett-et-al-2015
GPR119	Blodgett-et-al-2015
GPR3	Blodgett-et-al-2015
GRIK2	Blodgett-et-al-2015
GRINA	Blodgett-et-al-2015
GSTA4	Blodgett-et-al-2015
GSTK1	Blodgett-et-al-2015
GTF2IP1	Blodgett-et-al-2015
H2AFY2	Blodgett-et-al-2015
HIGD1A	Blodgett-et-al-2015
HIGD2A	Blodgett-et-al-2015
HIST2H2AA4	Blodgett-et-al-2015
HIST2H2BE	Blodgett-et-al-2015
HIST2H4A	Blodgett-et-al-2015
HMGB3	Blodgett-et-al-2015
HMGN2	Blodgett-et-al-2015
HMGN3	Blodgett-et-al-2015
HMP19	Blodgett-et-al-2015
HN1	Blodgett-et-al-2015
HNRNPA1	Blodgett-et-al-2015
HPN	Blodgett-et-al-2015
HPS1	Blodgett-et-al-2015
IFI6	Blodgett-et-al-2015
IFRD1	Blodgett-et-al-2015
IMPA2	Blodgett-et-al-2015
INSR	Blodgett-et-al-2015
IP6K2	Blodgett-et-al-2015
IQSEC3	Blodgett-et-al-2015
IREB2	Blodgett-et-al-2015
IRX1	Blodgett-et-al-2015
IRX2	Blodgett-et-al-2015
ITFG3	Blodgett-et-al-2015
ITGB1	Blodgett-et-al-2015
ITM2C	Blodgett-et-al-2015
ITPK1	Blodgett-et-al-2015
ITPR1	Blodgett-et-al-2015
JMJD8	Blodgett-et-al-2015
KANK1	Blodgett-et-al-2015
KCNH6	Blodgett-et-al-2015
KCNIP1	Blodgett-et-al-2015
KCNJ3	Blodgett-et-al-2015
KCNMB2	Blodgett-et-al-2015
KCTD12	Blodgett-et-al-2015
KCTD3	Blodgett-et-al-2015
KDELR2	Blodgett-et-al-2015
KIAA1377	Blodgett-et-al-2015
KIAA1549L	Blodgett-et-al-2015
KIAA1671	Blodgett-et-al-2015
KIF12	Blodgett-et-al-2015
KL	Blodgett-et-al-2015
KLF11	Blodgett-et-al-2015
KLHL3	Blodgett-et-al-2015
KRT19	Blodgett-et-al-2015
KRT8	Blodgett-et-al-2015
LAMB1	Blodgett-et-al-2015
LBH	Blodgett-et-al-2015
LCLAT1	Blodgett-et-al-2015
LDB2	Blodgett-et-al-2015
LDHA	Blodgett-et-al-2015
LEPROTL1	Blodgett-et-al-2015
LIMA1	Blodgett-et-al-2015
LINC00641	Blodgett-et-al-2015
LMO7	Blodgett-et-al-2015
LOC145837	Blodgett-et-al-2015
LOC550643	Blodgett-et-al-2015
LOC652276	Blodgett-et-al-2015
LOC728875	Blodgett-et-al-2015
LOXL4	Blodgett-et-al-2015
LPAR1	Blodgett-et-al-2015
LPGAT1	Blodgett-et-al-2015
LPPR1	Blodgett-et-al-2015
LPPR2	Blodgett-et-al-2015
LPPR4	Blodgett-et-al-2015
LRRC4	Blodgett-et-al-2015
LSM2	Blodgett-et-al-2015
LTBP3	Blodgett-et-al-2015
MAFF	Blodgett-et-al-2015
MAGED1	Blodgett-et-al-2015
MAGI2	Blodgett-et-al-2015
MAMLD1	Blodgett-et-al-2015
MAN2A1	Blodgett-et-al-2015
MAP3K15	Blodgett-et-al-2015
MAP3K4	Blodgett-et-al-2015
MAPK3	Blodgett-et-al-2015
MAPK6	Blodgett-et-al-2015
MARCKS	Blodgett-et-al-2015
MBOAT2	Blodgett-et-al-2015
MBOAT4	Blodgett-et-al-2015
MBOAT7	Blodgett-et-al-2015
MDK	Blodgett-et-al-2015
MED15	Blodgett-et-al-2015
MIA2	Blodgett-et-al-2015
MIDN	Blodgett-et-al-2015
MINOS1-NBL1	Blodgett-et-al-2015
MIR22HG	Blodgett-et-al-2015
MMP16	Blodgett-et-al-2015
MOB4	Blodgett-et-al-2015
MPC2	Blodgett-et-al-2015
MPDU1	Blodgett-et-al-2015
MS4A8	Blodgett-et-al-2015
MVD	Blodgett-et-al-2015
MYH10	Blodgett-et-al-2015
MYL12B	Blodgett-et-al-2015
MYO10	Blodgett-et-al-2015
MYSM1	Blodgett-et-al-2015
MZT2A	Blodgett-et-al-2015
N4BP2	Blodgett-et-al-2015
NASP	Blodgett-et-al-2015
NAT14	Blodgett-et-al-2015
NDRG3	Blodgett-et-al-2015
NDUFA3	Blodgett-et-al-2015
NDUFS3	Blodgett-et-al-2015
NDUFS8	Blodgett-et-al-2015
NECAB2	Blodgett-et-al-2015
NECAP1	Blodgett-et-al-2015
NEDD9	Blodgett-et-al-2015
NFIL3	Blodgett-et-al-2015
NFKB1	Blodgett-et-al-2015
NGFRAP1	Blodgett-et-al-2015
NME4	Blodgett-et-al-2015
NPDC1	Blodgett-et-al-2015
NPIPL2	Blodgett-et-al-2015
NPNT	Blodgett-et-al-2015
NRBF2	Blodgett-et-al-2015
NRP1	Blodgett-et-al-2015
NRXN1	Blodgett-et-al-2015
NT5C3B	Blodgett-et-al-2015
NT5DC3	Blodgett-et-al-2015
OCRL	Blodgett-et-al-2015
PAFAH1B3	Blodgett-et-al-2015
PBX1	Blodgett-et-al-2015
PCBD1	Blodgett-et-al-2015
PCF11	Blodgett-et-al-2015
PDE3B	Blodgett-et-al-2015
PDK4	Blodgett-et-al-2015
PDZD2	Blodgett-et-al-2015
PEG10	Blodgett-et-al-2015
PGAP1	Blodgett-et-al-2015
PIGS	Blodgett-et-al-2015
PIN1	Blodgett-et-al-2015
PKIG	Blodgett-et-al-2015
PLEKHJ1	Blodgett-et-al-2015
PLIN3	Blodgett-et-al-2015
PLXNB1	Blodgett-et-al-2015
PMPCA	Blodgett-et-al-2015
PNP	Blodgett-et-al-2015
POLB	Blodgett-et-al-2015
POLDIP3	Blodgett-et-al-2015
POLR2I	Blodgett-et-al-2015
POLR2L	Blodgett-et-al-2015
POLR2M	Blodgett-et-al-2015
POU6F2	Blodgett-et-al-2015
PPIA	Blodgett-et-al-2015
PPP1R13B	Blodgett-et-al-2015
PPP1R14C	Blodgett-et-al-2015
PPP1R3B	Blodgett-et-al-2015
PPP1R9A	Blodgett-et-al-2015
PPP2CA	Blodgett-et-al-2015
PPP2R1A	Blodgett-et-al-2015
PPP2R4	Blodgett-et-al-2015
PPP3CA	Blodgett-et-al-2015
PPP5C	Blodgett-et-al-2015
PPP6R2	Blodgett-et-al-2015
PPRC1	Blodgett-et-al-2015
PRAF2	Blodgett-et-al-2015
PRCC	Blodgett-et-al-2015
PRKACA	Blodgett-et-al-2015
PRKCE	Blodgett-et-al-2015
PRTFDC1	Blodgett-et-al-2015
PTBP2	Blodgett-et-al-2015
PTP4A1	Blodgett-et-al-2015
PTP4A3	Blodgett-et-al-2015
PTPRD	Blodgett-et-al-2015
PTPRT	Blodgett-et-al-2015
PTRHD1	Blodgett-et-al-2015
PUM1	Blodgett-et-al-2015
PYROXD2	Blodgett-et-al-2015
QDPR	Blodgett-et-al-2015
QSOX1	Blodgett-et-al-2015
RAB11A	Blodgett-et-al-2015
RAB11B	Blodgett-et-al-2015
RAB25	Blodgett-et-al-2015
RAB3A	Blodgett-et-al-2015
RABGEF1	Blodgett-et-al-2015
RAP1A	Blodgett-et-al-2015
RAPGEF4	Blodgett-et-al-2015
RAVER1	Blodgett-et-al-2015
RBBP6	Blodgett-et-al-2015
REC8	Blodgett-et-al-2015
REL	Blodgett-et-al-2015
RFX6	Blodgett-et-al-2015
RGL3	Blodgett-et-al-2015
RGS4	Blodgett-et-al-2015
RHOA	Blodgett-et-al-2015
RIMBP2	Blodgett-et-al-2015
RLF	Blodgett-et-al-2015
RMRP	Blodgett-et-al-2015
RNF139	Blodgett-et-al-2015
RNF150	Blodgett-et-al-2015
RPRD2	Blodgett-et-al-2015
RPS6KA3	Blodgett-et-al-2015
RTN1	Blodgett-et-al-2015
RYBP	Blodgett-et-al-2015
S100A10	Blodgett-et-al-2015
S100A13	Blodgett-et-al-2015
S100B	Blodgett-et-al-2015
SAMD5	Blodgett-et-al-2015
SCAF4	Blodgett-et-al-2015
SCAND1	Blodgett-et-al-2015
SCARNA2	Blodgett-et-al-2015
SEC14L1	Blodgett-et-al-2015
SEC31B	Blodgett-et-al-2015
SENP3-EIF4A1	Blodgett-et-al-2015
SEPN1	Blodgett-et-al-2015
SEPP1	Blodgett-et-al-2015
SERINC5	Blodgett-et-al-2015
SERPINA1	Blodgett-et-al-2015
SETD2	Blodgett-et-al-2015
SEZ6L	Blodgett-et-al-2015
SEZ6L2	Blodgett-et-al-2015
SF3B4	Blodgett-et-al-2015
SFPQ	Blodgett-et-al-2015
SGTA	Blodgett-et-al-2015
SH3BGRL	Blodgett-et-al-2015
SH3KBP1	Blodgett-et-al-2015
SH3PXD2A	Blodgett-et-al-2015
SH3RF1	Blodgett-et-al-2015
SIDT2	Blodgett-et-al-2015
SIMC1	Blodgett-et-al-2015
SIN3B	Blodgett-et-al-2015
SIPA1L3	Blodgett-et-al-2015
SKIL	Blodgett-et-al-2015
SLC22A17	Blodgett-et-al-2015
SLC25A22	Blodgett-et-al-2015
SLC25A44	Blodgett-et-al-2015
SLC35A2	Blodgett-et-al-2015
SLC38A4	Blodgett-et-al-2015
SLC39A13	Blodgett-et-al-2015
SLC40A1	Blodgett-et-al-2015
SLC41A1	Blodgett-et-al-2015
SLC41A2	Blodgett-et-al-2015
SLC6A8	Blodgett-et-al-2015
SLC7A14	Blodgett-et-al-2015
SLC7A2	Blodgett-et-al-2015
SLC7A8	Blodgett-et-al-2015
SMAP2	Blodgett-et-al-2015
SMARCA1	Blodgett-et-al-2015
SMOC1	Blodgett-et-al-2015
SNED1	Blodgett-et-al-2015
SNORA53	Blodgett-et-al-2015
SNORA74B	Blodgett-et-al-2015
SNORD17	Blodgett-et-al-2015
SNRPB	Blodgett-et-al-2015
SNRPG	Blodgett-et-al-2015
SORBS1	Blodgett-et-al-2015
SORD	Blodgett-et-al-2015
SOX5	Blodgett-et-al-2015
SPATS2L	Blodgett-et-al-2015
SPOCK3	Blodgett-et-al-2015
SPPL3	Blodgett-et-al-2015
SRSF7	Blodgett-et-al-2015
SS18L2	Blodgett-et-al-2015
SSBP4	Blodgett-et-al-2015
SSTR1	Blodgett-et-al-2015
SSTR2	Blodgett-et-al-2015
SSX2IP	Blodgett-et-al-2015
ST7	Blodgett-et-al-2015
STAT4	Blodgett-et-al-2015
STK32A	Blodgett-et-al-2015
STK32B	Blodgett-et-al-2015
SYNGR2	Blodgett-et-al-2015
SYNPO	Blodgett-et-al-2015
SYT17	Blodgett-et-al-2015
TAF10	Blodgett-et-al-2015
TCEAL5	Blodgett-et-al-2015
TCTA	Blodgett-et-al-2015
TET2	Blodgett-et-al-2015
TICAM1	Blodgett-et-al-2015
TIMM17B	Blodgett-et-al-2015
TJP2	Blodgett-et-al-2015
TLE2	Blodgett-et-al-2015
TLE3	Blodgett-et-al-2015
TM4SF1	Blodgett-et-al-2015
TMED4	Blodgett-et-al-2015
TMED8	Blodgett-et-al-2015
TMEM164	Blodgett-et-al-2015
TMEM236	Blodgett-et-al-2015
TMEM45B	Blodgett-et-al-2015
TMEM51	Blodgett-et-al-2015
TMEM88	Blodgett-et-al-2015
TMSB10	Blodgett-et-al-2015
TNFRSF19	Blodgett-et-al-2015
TNKS	Blodgett-et-al-2015
TOX3	Blodgett-et-al-2015
TP53I13	Blodgett-et-al-2015
TPD52L1	Blodgett-et-al-2015
TPST1	Blodgett-et-al-2015
TRAF4	Blodgett-et-al-2015
TRNP1	Blodgett-et-al-2015
TSPAN3	Blodgett-et-al-2015
TSPAN33	Blodgett-et-al-2015
TTC19	Blodgett-et-al-2015
TTN	Blodgett-et-al-2015
TUBA4A	Blodgett-et-al-2015
TUSC3	Blodgett-et-al-2015
TXNDC5	Blodgett-et-al-2015
U80764	Blodgett-et-al-2015
UBALD2	Blodgett-et-al-2015
UBB	Blodgett-et-al-2015
UBE2A	Blodgett-et-al-2015
UBE2D2	Blodgett-et-al-2015
UBE2G1	Blodgett-et-al-2015
UFC1	Blodgett-et-al-2015
UGT8	Blodgett-et-al-2015
UPF1	Blodgett-et-al-2015
UQCR10	Blodgett-et-al-2015
USH1C	Blodgett-et-al-2015
USP15	Blodgett-et-al-2015
USP27X	Blodgett-et-al-2015
VGF	Blodgett-et-al-2015
VPS28	Blodgett-et-al-2015
WDR34	Blodgett-et-al-2015
WDR77	Blodgett-et-al-2015
WEE1	Blodgett-et-al-2015
WFDC2	Blodgett-et-al-2015
WWC1	Blodgett-et-al-2015
YIPF2	Blodgett-et-al-2015
ZC3HAV1	Blodgett-et-al-2015
ZDHHC14	Blodgett-et-al-2015
ZNF131	Blodgett-et-al-2015
ZNF331	Blodgett-et-al-2015
ZNF410	Blodgett-et-al-2015
ZNF462	Blodgett-et-al-2015
ZNF532	Blodgett-et-al-2015
ZNF586	Blodgett-et-al-2015
ZNF608	Blodgett-et-al-2015
ZNF618	Blodgett-et-al-2015
ZNF644	Blodgett-et-al-2015
ABCC9	Blodgett-et-al-2015
ABCF1	Blodgett-et-al-2015
ABCF3	Blodgett-et-al-2015
ACOT13	Blodgett-et-al-2015
ACTR1A	Blodgett-et-al-2015
ADAM9	Blodgett-et-al-2015
ADD1	Blodgett-et-al-2015
AF289551	Blodgett-et-al-2015
AF401214	Blodgett-et-al-2015
AF420437	Blodgett-et-al-2015
AFF4	Blodgett-et-al-2015
AK057321	Blodgett-et-al-2015
AK092380	Blodgett-et-al-2015
AK097119	Blodgett-et-al-2015
AK097143	Blodgett-et-al-2015
AK127443	Blodgett-et-al-2015
AK303607	Blodgett-et-al-2015
AK311113	Blodgett-et-al-2015
AKAP13	Blodgett-et-al-2015
AKAP8	Blodgett-et-al-2015
AL832937	Blodgett-et-al-2015
ANAPC13	Blodgett-et-al-2015
ANKRD11	Blodgett-et-al-2015
ANKRD28	Blodgett-et-al-2015
ANKS1A	Blodgett-et-al-2015
ANP32B	Blodgett-et-al-2015
ANXA6	Blodgett-et-al-2015
AP1B1	Blodgett-et-al-2015
AP2A2	Blodgett-et-al-2015
AREL1	Blodgett-et-al-2015
ARFGEF1	Blodgett-et-al-2015
ARHGAP21	Blodgett-et-al-2015
ARHGDIA	Blodgett-et-al-2015
ARHGEF11	Blodgett-et-al-2015
ARID2	Blodgett-et-al-2015
ARID4B	Blodgett-et-al-2015
ARL17A	Blodgett-et-al-2015
ARPC1B	Blodgett-et-al-2015
ARPC4	Blodgett-et-al-2015
ASNA1	Blodgett-et-al-2015
ASXL2	Blodgett-et-al-2015
ATP9B	Blodgett-et-al-2015
ATXN1	Blodgett-et-al-2015
ATXN7	Blodgett-et-al-2015
AX746869	Blodgett-et-al-2015
AX747393	Blodgett-et-al-2015
B4GALNT3	Blodgett-et-al-2015
BAHD1	Blodgett-et-al-2015
BC042616	Blodgett-et-al-2015
BC042955	Blodgett-et-al-2015
BC107108	Blodgett-et-al-2015
BCR	Blodgett-et-al-2015
BICD1	Blodgett-et-al-2015
BTBD6	Blodgett-et-al-2015
C10orf76	Blodgett-et-al-2015
C12orf50	Blodgett-et-al-2015
C2CD3	Blodgett-et-al-2015
C6orf62	Blodgett-et-al-2015
C9orf3	Blodgett-et-al-2015
CACFD1	Blodgett-et-al-2015
CALM3	Blodgett-et-al-2015
CAMK2G	Blodgett-et-al-2015
CAPN1	Blodgett-et-al-2015
CAPZB	Blodgett-et-al-2015
CBLL1	Blodgett-et-al-2015
CCDC92	Blodgett-et-al-2015
CCDC97	Blodgett-et-al-2015
CCNK	Blodgett-et-al-2015
CD82	Blodgett-et-al-2015
CDK11B	Blodgett-et-al-2015
CDK12	Blodgett-et-al-2015
CELSR3	Blodgett-et-al-2015
CEP164	Blodgett-et-al-2015
CEP68	Blodgett-et-al-2015
CHD2	Blodgett-et-al-2015
CHD3	Blodgett-et-al-2015
CHD4	Blodgett-et-al-2015
CHERP	Blodgett-et-al-2015
CHIC2	Blodgett-et-al-2015
CKAP4	Blodgett-et-al-2015
CLDN7	Blodgett-et-al-2015
CLK3	Blodgett-et-al-2015
CLPTM1	Blodgett-et-al-2015
CMIP	Blodgett-et-al-2015
CNNM3	Blodgett-et-al-2015
CNPPD1	Blodgett-et-al-2015
COA4	Blodgett-et-al-2015
COG7	Blodgett-et-al-2015
COPS7B	Blodgett-et-al-2015
CRMP1	Blodgett-et-al-2015
CSNK1D	Blodgett-et-al-2015
CSNK1E	Blodgett-et-al-2015
CTDNEP1	Blodgett-et-al-2015
CTSH	Blodgett-et-al-2015
CTSZ	Blodgett-et-al-2015
CUL7	Blodgett-et-al-2015
CUX1	Blodgett-et-al-2015
DAG1	Blodgett-et-al-2015
DCAF8	Blodgett-et-al-2015
DCP1A	Blodgett-et-al-2015
DCTN4	Blodgett-et-al-2015
DCUN1D2	Blodgett-et-al-2015
DDB1	Blodgett-et-al-2015
DENND4A	Blodgett-et-al-2015
DENND5B	Blodgett-et-al-2015
DHRS4L2	Blodgett-et-al-2015
DHX38	Blodgett-et-al-2015
DIAPH2	Blodgett-et-al-2015
DIP2C	Blodgett-et-al-2015
DL492557	Blodgett-et-al-2015
DNAJB5	Blodgett-et-al-2015
DNAJC2	Blodgett-et-al-2015
DNAJC5	Blodgett-et-al-2015
DNAJC7	Blodgett-et-al-2015
DNM1	Blodgett-et-al-2015
DQ575504	Blodgett-et-al-2015
DROSHA	Blodgett-et-al-2015
DTNB	Blodgett-et-al-2015
DVL3	Blodgett-et-al-2015
DYNLL2	Blodgett-et-al-2015
DYRK1A	Blodgett-et-al-2015
EFCAB14	Blodgett-et-al-2015
EGFEM1P	Blodgett-et-al-2015
EIF2B4	Blodgett-et-al-2015
EIF3C	Blodgett-et-al-2015
EIF4G1	Blodgett-et-al-2015
ELMSAN1	Blodgett-et-al-2015
ELOVL5	Blodgett-et-al-2015
ENTPD4	Blodgett-et-al-2015
EP400	Blodgett-et-al-2015
ERAP1	Blodgett-et-al-2015
ERGIC1	Blodgett-et-al-2015
ETF1	Blodgett-et-al-2015
FADS2	Blodgett-et-al-2015
FAM134C	Blodgett-et-al-2015
FAM193A	Blodgett-et-al-2015
FAM57A	Blodgett-et-al-2015
FAM65A	Blodgett-et-al-2015
FASN	Blodgett-et-al-2015
FBXW7	Blodgett-et-al-2015
FGFR1	Blodgett-et-al-2015
FLJ45340	Blodgett-et-al-2015
FLNB	Blodgett-et-al-2015
FNBP4	Blodgett-et-al-2015
FOXJ2	Blodgett-et-al-2015
FOXK1	Blodgett-et-al-2015
FOXO1	Blodgett-et-al-2015
FOXP1	Blodgett-et-al-2015
FRY	Blodgett-et-al-2015
FTSJ3	Blodgett-et-al-2015
FUS	Blodgett-et-al-2015
FYCO1	Blodgett-et-al-2015
GAB2	Blodgett-et-al-2015
GAPVD1	Blodgett-et-al-2015
GATAD2A	Blodgett-et-al-2015
GBF1	Blodgett-et-al-2015
GDI1	Blodgett-et-al-2015
GGA3	Blodgett-et-al-2015
GLYR1	Blodgett-et-al-2015
GNA11	Blodgett-et-al-2015
GNAO1	Blodgett-et-al-2015
GNAZ	Blodgett-et-al-2015
GNE	Blodgett-et-al-2015
GON4L	Blodgett-et-al-2015
GOSR1	Blodgett-et-al-2015
GPATCH2L	Blodgett-et-al-2015
GPATCH8	Blodgett-et-al-2015
GPBP1L1	Blodgett-et-al-2015
GPI	Blodgett-et-al-2015
GTF2F1	Blodgett-et-al-2015
GTPBP4	Blodgett-et-al-2015
GUSBP1	Blodgett-et-al-2015
GUSBP11	Blodgett-et-al-2015
HDAC5	Blodgett-et-al-2015
HELZ	Blodgett-et-al-2015
HERPUD2	Blodgett-et-al-2015
HGSNAT	Blodgett-et-al-2015
HIF1A	Blodgett-et-al-2015
HIP1R	Blodgett-et-al-2015
HIPK2	Blodgett-et-al-2015
HIST1H1E	Blodgett-et-al-2015
HIST1H2BC	Blodgett-et-al-2015
HIST1H2BD	Blodgett-et-al-2015
HIST1H2BG	Blodgett-et-al-2015
HIST4H4	Blodgett-et-al-2015
HUWE1	Blodgett-et-al-2015
HYPK	Blodgett-et-al-2015
IFNGR2	Blodgett-et-al-2015
IL1R1	Blodgett-et-al-2015
IL6ST	Blodgett-et-al-2015
ILF3	Blodgett-et-al-2015
INO80D	Blodgett-et-al-2015
IRGQ	Blodgett-et-al-2015
ITSN2	Blodgett-et-al-2015
IWS1	Blodgett-et-al-2015
JOSD1	Blodgett-et-al-2015
KANSL2	Blodgett-et-al-2015
KAT6A	Blodgett-et-al-2015
KAT7	Blodgett-et-al-2015
KCND3	Blodgett-et-al-2015
KDM2A	Blodgett-et-al-2015
KDM4C	Blodgett-et-al-2015
KDM5A	Blodgett-et-al-2015
KDM5C	Blodgett-et-al-2015
KIAA0100	Blodgett-et-al-2015
KIAA1217	Blodgett-et-al-2015
KIAA2018	Blodgett-et-al-2015
KLF10	Blodgett-et-al-2015
KLHL18	Blodgett-et-al-2015
KMT2A	Blodgett-et-al-2015
KMT2C	Blodgett-et-al-2015
LAT2	Blodgett-et-al-2015
LETM2	Blodgett-et-al-2015
LIG3	Blodgett-et-al-2015
LINC00473	Blodgett-et-al-2015
LINC00674	Blodgett-et-al-2015
LOC100132832	Blodgett-et-al-2015
[truncated: 263 more rows]
