# Supplementary material for: Single-cell transcriptomes identify human islet cell signatures and reveal cell-type–specific expression changes in type 2 diabetes
Source: Genome Res. 2017 Feb;27(2):208–22. doi: 10.1101/gr.212720.116 (PMC5287227; doi:10.1101/gr.212720.116)
Supplement: Supplemental Material [file supp_gr.212720.116_Supplemental_Table_S11.xlsx]

## Sheet: Monogenic.Diab.Risk.Genes.ANOVA
Supplemental_Table_S11: Investigating the enrichment of previously reported diabetes genome-wide association study (GWAS) and expression quantitative trait loci (eQTL) genes identifies several cell-type-specific targets.
Table containing lists of reported diabetes related GWAS and T2D eQTL reported genes and their determined islet cell enrichment after performing one-way analysis of variance (ANOVA) testing in conjunction with Tukey’s Honest Significant Difference (THSD) post-hoc analysis. The table also shows the names and numbers of genes found to be enriched in a specific cell type (>4 fold change in expressio…
Expression in Endocrine Cells	Number of Genes (out of total 33 genes)	Gene Symbol
Beta	5	CISD2, SLC2A2, ABCC8, PLAGL1, PDX1
Delta	1	UCP2
Beta.Alpha	1	WFS1
Beta.Delta	2	INS, HADH
Beta.Gamma	1	GLIS3
Alpha.Delta	1	RFX6
Beta.Alpha.Gamma	1	PAX6
Pan-Islet	1	NEUROD1
Lowly Expressed (Average Log2CPM < 2 across all islet cells)	15	SLC19A2, HNF4A, EIF2AK3, PAX4, MNX1, KLF11, CEL, GCK, SLC29A3, NEUROG3, HNF1B, PTF1A, GATA4, BLK, GATA6
< 4-fold change	5	SLC16A1, KCNJ11, GLUD1, HNF1A, IER3IP1

## Sheet: Reported.EQTLs.ANOVA
Expression in Endocrine Cells	Number of Genes (out of total 536 genes)	Gene Symbol
Beta	7	MLH3, PYROXD1, AKAP2, APOL4, PRUNE2, VWDE, GRIA4
Alpha	3	HLA-B, MCOLN3, FADS1
Delta	7	BPGM, TCF7L2, EPHX2, C1orf173, ST6GAL1, CNTLN, RGS17
Gamma	2	FAM118A, GBP3
Beta.Alpha	2	PSMC5, HSPA4L
Beta.Delta	3	NTPCR, GAS2, PCP4
Alpha.Delta	1	CNN3
Alpha.Gamma	1	PLIN3
Beta.Alpha.Delta	2	TSPYL5, KCNJ6
Beta.Alpha.Gamma	2	RIN2, G6PC2
Beta.Gamma.Delta	3	TMED6, PCSK1, ZMIZ1
Pan-Islet	35	RBM6, DCTN5, HLA-C, TSGA13, UPK3BL, GSTM3, POLR2J3, NDUFA3, GPBP1, CPNE1, TMEM45A, NDUFA10, HSD17B12, CAMK1D, TRAPPC4, QPCT, NAPG, HLA-A, C15orf57, C10orf32, L1TD1, TPMT, NDUFV3, BLOC1S1, MYH10, CCDC122, PCGF5, CHURC1, RPS23, ADAM32, RPS26, KDELC2, SH3YL1, CYP3A5, RWDD2B
Lowly Expressed (Average Log2CPM < 2 across all islet cells)	309	TRPV4, CFHR3, CCDC85A, TDRD5, ST8SIA6, SERPINC1, ADCY10, C1QL3, FCGR2A, PCP4L1, C2orf73, LRRC23, ACP6, REP15, FCER1A, AMT, NOTCH2NL, ALPL, NBPF3, IL21R, HS3ST4, MMP7, SPATA22, OR3A2, SSPN, CCDC65, WARS2, PLA2G2A, RASSF8, SLC5A11, HOXC8, TSHB, NFATC4, GP5, HEPHL1, ANPEP, SNX16, TMEM102, MICB, ADA, ADCY4, LINC01115, KLHDC7A, CCDC67, SRR, MTNR1B, THSD7B, AGBL1, TAPBPL, LILRA2, COL2A1, PAQR6, PON1, A…
< 4-fold change	159	C2orf74, BDH1, SMEK2, RNF168, PPFIBP1, ATP1B2, AP3S2, COG7, C11orf54, MICA, AP4B1, COPG2, ST7L, HNMT, KCND3, SNX19, DHX35, ZNF107, PSMD13, POLR2J2, CTRC, C15orf40, MADD, XKR9, FOXRED1, HNRNPL, SLC41A3, TMEM163, AGXT, SMC2, ZNF468, NOMO3, NDUFB7, ZNF83, FN3KRP, CIAPIN1, CHRNB4, SLC12A8, DHRS4L2, THNSL2, XRRA1, DCAF4, ELP3, ZNF670, EFCAB2, SRSF12, RBMXL1, CCBL2, LYRM4, NOM1, CAT, TSFM, STARD10, KIA…

## Sheet: T2D.Reported.GWAS.ANOVA
Expression in Endocrine Cells	Number of Genes (out of total 162 genes)	Gene Symbol
Beta	8	CCND2, SSR1, RASGRP1, IAPP, TBC1D4, SLC2A2, VEGFA, PDX1
Alpha	1	FADS1
Delta	5	THADA, TCF7L2, ST6GAL1, PROX1, HHEX
Beta.Alpha	2	WFS1, IGF1R
Beta.Delta	1	INS
Beta.Gamma	1	GLIS3
Gamma.Delta	1	KANK1
Beta.Alpha.Delta	3	SLC30A8, KCNK16, PSMD6
Beta.Alpha.Gamma	2	PAM, G6PC2
Beta.Gamma.Delta	2	PCSK1, ZMIZ1
Pan-Islet	14	POU5F1, MACF1, ZFAND6, RREB1, CAMK1D, LPP, MAEA, GIPR, TPT1, HFE, CPE, HMGA2, GNAS, PPP1R3B
Lowly Expressed (Average Log2CPM < 2 across all islet cells)	86	BCL11A, AMT, RND3, SPTA1, NOTCH2, ADAM30, HNF4A, SRR, MTNR1B, DUSP9, MYO9B, KLF14, TCF19, TMEM79, OR4S1, CPA1, GRB10, ADRA2A, ANKRD55, CYBA, ZBED3, RSPO3, SLC16A11, SLC16A13, CRY2, LEP, PAX4, GCC1, ADCY5, GRB14, ATP11A, TLE4, ARAP1, BCAR1, UBE2E2, RBMS1, SPRY2, DNLZ, GPSM1, IGF1, GRK5, TMPRSS6, DDX31, LARP6, GCK, BCL2, MYL2, CCDC63, C2CD4B, REG1B, GLP1R, P2RX2, MC4R, LGR5, TSPAN8, GCKR, CILP2, PR…
< 4-fold change	36	HIP1, RBM43, TET2, AP3S2, SGSM2, TOP1, JAZF1, MADD, IKBKAP, TMEM163, TBC1D30, FN3K, FAM13A, HMG20A, FTO, ARL15, TLE1, MPHOSPH9, DGKB, CDC123, LAMA1, FOXA2, PEPD, TP53INP1, LYPLAL1, WARS, C2CD4A, KCNJ11, PDK1, PPIP5K2, MYB, CDKAL1, VPS26A, HNF1A, HBS1L, TMEM154

## Sheet: T1D.Reported.GWAS.ANOVA
Expression in Endocrine Cells	Number of Genes (out of total 38 genes)	Gene Symbol
Beta	3	RASGRP1, DLK1, MEG3
Beta.Delta	1	INS
Beta.Gamma	1	GLIS3
Pan-Islet	2	PTPN2, PTPN11
Lowly Expressed (Average Log2CPM < 2 across all islet cells)	21	IL27, PTPN22, PRKCQ, IL2RA, CTSH, HLA-DRB1, BACH2, PRM3, TNP2, DEXI, DIO3, RTL1, CD226, CD69, CTLA4, ORMDL3, UBASH3A, TRAFD1, ERBB3, IL7R, IL2
< 4-fold change	10	PHTF1, COBL, CLEC16A, AFF3, IFIH1, PGM1, TYK2, SH2B3, IL10, RAB5B

## Sheet: GWAS_Gene_List
Gene_Symbol	Category	Study	Class
HLA-DRB1	Type_1_Diabetes	Nica_et_al_2013_Figure_S5
TNP2	Type_1_Diabetes	Nica_et_al_2013_Figure_S5
IL2	Type_1_Diabetes	Nica_et_al_2013_Figure_S5
IL2RA	Type_1_Diabetes	Nica_et_al_2013_Figure_S5
CTLA4	Type_1_Diabetes	Nica_et_al_2013_Figure_S5
CD69	Type_1_Diabetes	Nica_et_al_2013_Figure_S5
PRM3	Type_1_Diabetes	Nica_et_al_2013_Figure_S5
C16orf75	Type_1_Diabetes	Nica_et_al_2013_Figure_S5
IL7R	Type_1_Diabetes	Nica_et_al_2013_Figure_S5
DIO3	Type_1_Diabetes	Nica_et_al_2013_Figure_S5
UBASH3A	Type_1_Diabetes	Nica_et_al_2013_Figure_S5
AFF3	Type_1_Diabetes	Nica_et_al_2013_Figure_S5
PTPN22	Type_1_Diabetes	Nica_et_al_2013_Figure_S5
IL10	Type_1_Diabetes	Nica_et_al_2013_Figure_S5
CD226	Type_1_Diabetes	Nica_et_al_2013_Figure_S5
CSPSL	Type_1_Diabetes	Nica_et_al_2013_Figure_S5
ERBB3	Type_1_Diabetes	Nica_et_al_2013_Figure_S5
RTL1	Type_1_Diabetes	Nica_et_al_2013_Figure_S5
IL27	Type_1_Diabetes	Nica_et_al_2013_Figure_S5
BACH2	Type_1_Diabetes	Nica_et_al_2013_Figure_S5
PRKCQ	Type_1_Diabetes	Nica_et_al_2013_Figure_S5
C1QTNE6	Type_1_Diabetes	Nica_et_al_2013_Figure_S5
CTSH	Type_1_Diabetes	Nica_et_al_2013_Figure_S5
CLEC16A	Type_1_Diabetes	Nica_et_al_2013_Figure_S5
PHTF1	Type_1_Diabetes	Nica_et_al_2013_Figure_S5
PTPN2	Type_1_Diabetes	Nica_et_al_2013_Figure_S5
SH2B3	Type_1_Diabetes	Nica_et_al_2013_Figure_S5
IFIH1	Type_1_Diabetes	Nica_et_al_2013_Figure_S5
RASGRP1	Type_1_Diabetes	Nica_et_al_2013_Figure_S5
COBL	Type_1_Diabetes	Nica_et_al_2013_Figure_S5
TRAFD1	Type_1_Diabetes	Nica_et_al_2013_Figure_S5
GLIS3	Type_1_Diabetes	Nica_et_al_2013_Figure_S5
PGM1	Type_1_Diabetes	Nica_et_al_2013_Figure_S5
TYK2	Type_1_Diabetes	Nica_et_al_2013_Figure_S5
ORMDL3	Type_1_Diabetes	Nica_et_al_2013_Figure_S5
PTPN11	Type_1_Diabetes	Nica_et_al_2013_Figure_S5
RAB5B	Type_1_Diabetes	Nica_et_al_2013_Figure_S5
MEG3	Type_1_Diabetes	Nica_et_al_2013_Figure_S5
DLK1	Type_1_Diabetes	Nica_et_al_2013_Figure_S5
INS	Type_1_Diabetes	Nica_et_al_2013_Figure_S5
CLEC16A	Type_1_Diabetes	Bakay_et_al_2013
CTSH	Type_1_Diabetes	Bakay_et_al_2013
DEXI	Type_1_Diabetes	Bakay_et_al_2013
TYK2	Type_1_Diabetes	Marroqui_et_al_2015
ADAM30	Type_2_Diabetes	Nica_et_al_2013_Figure_S5
DCD	Type_2_Diabetes	Nica_et_al_2013_Figure_S5
DUSP9	Type_2_Diabetes	Nica_et_al_2013_Figure_S5
HMGA2	Type_2_Diabetes	Nica_et_al_2013_Figure_S5
SYN2	Type_2_Diabetes	Nica_et_al_2013_Figure_S5
PPARG	Type_2_Diabetes	Nica_et_al_2013_Figure_S5
KLF14	Type_2_Diabetes	Nica_et_al_2013_Figure_S5
LGR5	Type_2_Diabetes	Nica_et_al_2013_Figure_S5
BCL11A	Type_2_Diabetes	Nica_et_al_2013_Figure_S5
KCNQ1	Type_2_Diabetes	Nica_et_al_2013_Figure_S5
ADAMTS9	Type_2_Diabetes	Nica_et_al_2013_Figure_S5
NOTCH2	Type_2_Diabetes	Nica_et_al_2013_Figure_S5
MTNR1B	Type_2_Diabetes	Nica_et_al_2013_Figure_S5
ITGBB	Type_2_Diabetes	Nica_et_al_2013_Figure_S5
TSPAN8	Type_2_Diabetes	Nica_et_al_2013_Figure_S5
PRC1	Type_2_Diabetes	Nica_et_al_2013_Figure_S5
HHEX	Type_2_Diabetes	Nica_et_al_2013_Figure_S5
CAMK1D	Type_2_Diabetes	Nica_et_al_2013_Figure_S5
IGF2BP2	Type_2_Diabetes	Nica_et_al_2013_Figure_S5
RBMS1	Type_2_Diabetes	Nica_et_al_2013_Figure_S5
IRS1	Type_2_Diabetes	Nica_et_al_2013_Figure_S5
CDKN2B	Type_2_Diabetes	Nica_et_al_2013_Figure_S5
HNF1B	Type_2_Diabetes	Nica_et_al_2013_Figure_S5
THADA	Type_2_Diabetes	Nica_et_al_2013_Figure_S5
CDKN2A	Type_2_Diabetes	Nica_et_al_2013_Figure_S5
CDKAL1	Type_2_Diabetes	Nica_et_al_2013_Figure_S5
TCF7L2	Type_2_Diabetes	Nica_et_al_2013_Figure_S5
IDE	Type_2_Diabetes	Nica_et_al_2013_Figure_S5
HNF1A	Type_2_Diabetes	Nica_et_al_2013_Figure_S5
FTC	Type_2_Diabetes	Nica_et_al_2013_Figure_S5
CDC123	Type_2_Diabetes	Nica_et_al_2013_Figure_S5
ZBED3	Type_2_Diabetes	Nica_et_al_2013_Figure_S5
JAZF1	Type_2_Diabetes	Nica_et_al_2013_Figure_S5
TP53INP1	Type_2_Diabetes	Nica_et_al_2013_Figure_S5
ZFAND6	Type_2_Diabetes	Nica_et_al_2013_Figure_S5
KCNJ11	Type_2_Diabetes	Nica_et_al_2013_Figure_S5
WFS1	Type_2_Diabetes	Nica_et_al_2013_Figure_S5
VEGFA	Type_2_Diabetes	Nica_et_al_2013_Figure_S5
SLC30A8	Type_2_Diabetes	Nica_et_al_2013_Figure_S5
MACF1	Type_2_Diabetes	Mohlke_and_Boehnke_2015_Table_1
FAF1	Type_2_Diabetes	Mohlke_and_Boehnke_2015_Table_1
NOTCH2	Type_2_Diabetes	Mohlke_and_Boehnke_2015_Table_1
PROX1	Type_2_Diabetes	Mohlke_and_Boehnke_2015_Table_1
GCKR	Type_2_Diabetes	Mohlke_and_Boehnke_2015_Table_1
THADA	Type_2_Diabetes	Mohlke_and_Boehnke_2015_Table_1
BCL11A	Type_2_Diabetes	Mohlke_and_Boehnke_2015_Table_1
TMEM163	Type_2_Diabetes	Mohlke_and_Boehnke_2015_Table_1
RND3	Type_2_Diabetes	Mohlke_and_Boehnke_2015_Table_1
RBM43	Type_2_Diabetes	Mohlke_and_Boehnke_2015_Table_1
RBMS1	Type_2_Diabetes	Mohlke_and_Boehnke_2015_Table_1
GRB14	Type_2_Diabetes	Mohlke_and_Boehnke_2015_Table_1
IRS1	Type_2_Diabetes	Mohlke_and_Boehnke_2015_Table_1
PPARG	Type_2_Diabetes	Mohlke_and_Boehnke_2015_Table_1
UBE2E2	Type_2_Diabetes	Mohlke_and_Boehnke_2015_Table_1
PSMD6	Type_2_Diabetes	Mohlke_and_Boehnke_2015_Table_1
ADAMTS9	Type_2_Diabetes	Mohlke_and_Boehnke_2015_Table_1
ADCY5	Type_2_Diabetes	Mohlke_and_Boehnke_2015_Table_1
IGF2BP2	Type_2_Diabetes	Mohlke_and_Boehnke_2015_Table_1
ST6GAL1	Type_2_Diabetes	Mohlke_and_Boehnke_2015_Table_1
LPP	Type_2_Diabetes	Mohlke_and_Boehnke_2015_Table_1
MAEA	Type_2_Diabetes	Mohlke_and_Boehnke_2015_Table_1
WFS1	Type_2_Diabetes	Mohlke_and_Boehnke_2015_Table_1
TMEM154	Type_2_Diabetes	Mohlke_and_Boehnke_2015_Table_1
ARL15	Type_2_Diabetes	Mohlke_and_Boehnke_2015_Table_1
ANKRD55	Type_2_Diabetes	Mohlke_and_Boehnke_2015_Table_1
ZBED3	Type_2_Diabetes	Mohlke_and_Boehnke_2015_Table_1
PPIP5K2	Type_2_Diabetes	Mohlke_and_Boehnke_2015_Table_1
PAM	Type_2_Diabetes	Mohlke_and_Boehnke_2015_Table_1
RREB1	Type_2_Diabetes	Mohlke_and_Boehnke_2015_Table_1
SSR1	Type_2_Diabetes	Mohlke_and_Boehnke_2015_Table_1
CDKAL1	Type_2_Diabetes	Mohlke_and_Boehnke_2015_Table_1
TCF19	Type_2_Diabetes	Mohlke_and_Boehnke_2015_Table_1
POU5F1	Type_2_Diabetes	Mohlke_and_Boehnke_2015_Table_1
ZFAND3	Type_2_Diabetes	Mohlke_and_Boehnke_2015_Table_1
KCNK16	Type_2_Diabetes	Mohlke_and_Boehnke_2015_Table_1
DGKB	Type_2_Diabetes	Mohlke_and_Boehnke_2015_Table_1
JAZF1	Type_2_Diabetes	Mohlke_and_Boehnke_2015_Table_1
PAX4	Type_2_Diabetes	Mohlke_and_Boehnke_2015_Table_1
GCK	Type_2_Diabetes	Mohlke_and_Boehnke_2015_Table_1
GCC1	Type_2_Diabetes	Mohlke_and_Boehnke_2015_Table_1
LEP	Type_2_Diabetes	Mohlke_and_Boehnke_2015_Table_1
MIR129	Type_2_Diabetes	Mohlke_and_Boehnke_2015_Table_1
KLF14	Type_2_Diabetes	Mohlke_and_Boehnke_2015_Table_1
ANK1	Type_2_Diabetes	Mohlke_and_Boehnke_2015_Table_1
TP53INP1	Type_2_Diabetes	Mohlke_and_Boehnke_2015_Table_1
SLC30A8	Type_2_Diabetes	Mohlke_and_Boehnke_2015_Table_1
GLIS3	Type_2_Diabetes	Mohlke_and_Boehnke_2015_Table_1
PTPRD	Type_2_Diabetes	Mohlke_and_Boehnke_2015_Table_1
CDKN2B	Type_2_Diabetes	Mohlke_and_Boehnke_2015_Table_1
CDKN2A	Type_2_Diabetes	Mohlke_and_Boehnke_2015_Table_1
TLE4	Type_2_Diabetes	Mohlke_and_Boehnke_2015_Table_1
TLE1	Type_2_Diabetes	Mohlke_and_Boehnke_2015_Table_1
GPSM1	Type_2_Diabetes	Mohlke_and_Boehnke_2015_Table_1
CAMK1D	Type_2_Diabetes	Mohlke_and_Boehnke_2015_Table_1
VPS26A	Type_2_Diabetes	Mohlke_and_Boehnke_2015_Table_1
IDE	Type_2_Diabetes	Mohlke_and_Boehnke_2015_Table_1
ZMIZ1	Type_2_Diabetes	Mohlke_and_Boehnke_2015_Table_1
HHEX	Type_2_Diabetes	Mohlke_and_Boehnke_2015_Table_1
TCF7L2	Type_2_Diabetes	Mohlke_and_Boehnke_2015_Table_1
GRK5	Type_2_Diabetes	Mohlke_and_Boehnke_2015_Table_1
DUSP8	Type_2_Diabetes	Mohlke_and_Boehnke_2015_Table_1
KCNQ1	Type_2_Diabetes	Mohlke_and_Boehnke_2015_Table_1
KCNJ11	Type_2_Diabetes	Mohlke_and_Boehnke_2015_Table_1
CENTD2	Type_2_Diabetes	Mohlke_and_Boehnke_2015_Table_1
MTNR1B	Type_2_Diabetes	Mohlke_and_Boehnke_2015_Table_1
CCND2	Type_2_Diabetes	Mohlke_and_Boehnke_2015_Table_1
KLHDC5	Type_2_Diabetes	Mohlke_and_Boehnke_2015_Table_1
HMGA2	Type_2_Diabetes	Mohlke_and_Boehnke_2015_Table_1
LGR5	Type_2_Diabetes	Mohlke_and_Boehnke_2015_Table_1
TSPAN8	Type_2_Diabetes	Mohlke_and_Boehnke_2015_Table_1
CCDC63	Type_2_Diabetes	Mohlke_and_Boehnke_2015_Table_1
C12orf51	Type_2_Diabetes	Mohlke_and_Boehnke_2015_Table_1
HNF1A	Type_2_Diabetes	Mohlke_and_Boehnke_2015_Table_1
MPHOSPH9	Type_2_Diabetes	Mohlke_and_Boehnke_2015_Table_1
SGCG	Type_2_Diabetes	Mohlke_and_Boehnke_2015_Table_1
TBC1D4	Type_2_Diabetes	Mohlke_and_Boehnke_2015_Table_1
SPRY2	Type_2_Diabetes	Mohlke_and_Boehnke_2015_Table_1
RASGRP1	Type_2_Diabetes	Mohlke_and_Boehnke_2015_Table_1
C2CD4A	Type_2_Diabetes	Mohlke_and_Boehnke_2015_Table_1
C2CD4B	Type_2_Diabetes	Mohlke_and_Boehnke_2015_Table_1
HMG20A	Type_2_Diabetes	Mohlke_and_Boehnke_2015_Table_1
ZFAND6	Type_2_Diabetes	Mohlke_and_Boehnke_2015_Table_1
AP3S2	Type_2_Diabetes	Mohlke_and_Boehnke_2015_Table_1
PRC1	Type_2_Diabetes	Mohlke_and_Boehnke_2015_Table_1
FTO	Type_2_Diabetes	Mohlke_and_Boehnke_2015_Table_1
BCAR1	Type_2_Diabetes	Mohlke_and_Boehnke_2015_Table_1
SRR	Type_2_Diabetes	Mohlke_and_Boehnke_2015_Table_1
SLC16A11	Type_2_Diabetes	Mohlke_and_Boehnke_2015_Table_1
SLC16A13	Type_2_Diabetes	Mohlke_and_Boehnke_2015_Table_1
HNF1B	Type_2_Diabetes	Mohlke_and_Boehnke_2015_Table_1
LAMA1	Type_2_Diabetes	Mohlke_and_Boehnke_2015_Table_1
MC4R	Type_2_Diabetes	Mohlke_and_Boehnke_2015_Table_1
BCL2	Type_2_Diabetes	Mohlke_and_Boehnke_2015_Table_1
CILP2	Type_2_Diabetes	Mohlke_and_Boehnke_2015_Table_1
PEPD	Type_2_Diabetes	Mohlke_and_Boehnke_2015_Table_1
GIPR	Type_2_Diabetes	Mohlke_and_Boehnke_2015_Table_1
HNF4A	Type_2_Diabetes	Mohlke_and_Boehnke_2015_Table_1
DUSP9	Type_2_Diabetes	Mohlke_and_Boehnke_2015_Table_1
TMEM79	Type_2_Diabetes	Mohlke_and_Boehnke_2015_Table_2
SPTA1	Type_2_Diabetes	Mohlke_and_Boehnke_2015_Table_2
PROX1	Type_2_Diabetes	Mohlke_and_Boehnke_2015_Table_2
LYPLAL1	Type_2_Diabetes	Mohlke_and_Boehnke_2015_Table_2
DPYSL5	Type_2_Diabetes	Mohlke_and_Boehnke_2015_Table_2
GCKR	Type_2_Diabetes	Mohlke_and_Boehnke_2015_Table_2
SIX2	Type_2_Diabetes	Mohlke_and_Boehnke_2015_Table_2
SIX3	Type_2_Diabetes	Mohlke_and_Boehnke_2015_Table_2
YSK4	Type_2_Diabetes	Mohlke_and_Boehnke_2015_Table_2
GRB14	Type_2_Diabetes	Mohlke_and_Boehnke_2015_Table_2
G6PC2	Type_2_Diabetes	Mohlke_and_Boehnke_2015_Table_2
PDK1	Type_2_Diabetes	Mohlke_and_Boehnke_2015_Table_2
IRS1	Type_2_Diabetes	Mohlke_and_Boehnke_2015_Table_2
PPARG	Type_2_Diabetes	Mohlke_and_Boehnke_2015_Table_2
AMT	Type_2_Diabetes	Mohlke_and_Boehnke_2015_Table_2
ADCY5	Type_2_Diabetes	Mohlke_and_Boehnke_2015_Table_2
SLC2A2	Type_2_Diabetes	Mohlke_and_Boehnke_2015_Table_2
IGF2BP2	Type_2_Diabetes	Mohlke_and_Boehnke_2015_Table_2
FAM13A	Type_2_Diabetes	Mohlke_and_Boehnke_2015_Table_2
TET2	Type_2_Diabetes	Mohlke_and_Boehnke_2015_Table_2
PDGFC	Type_2_Diabetes	Mohlke_and_Boehnke_2015_Table_2
SC4MOL	Type_2_Diabetes	Mohlke_and_Boehnke_2015_Table_2
ARL15	Type_2_Diabetes	Mohlke_and_Boehnke_2015_Table_2
ANKRD55	Type_2_Diabetes	Mohlke_and_Boehnke_2015_Table_2
ZBED3	Type_2_Diabetes	Mohlke_and_Boehnke_2015_Table_2
PCSK1	Type_2_Diabetes	Mohlke_and_Boehnke_2015_Table_2
ERAP2	Type_2_Diabetes	Mohlke_and_Boehnke_2015_Table_2
PPIP5K2	Type_2_Diabetes	Mohlke_and_Boehnke_2015_Table_2
PAM	Type_2_Diabetes	Mohlke_and_Boehnke_2015_Table_2
RREB1	Type_2_Diabetes	Mohlke_and_Boehnke_2015_Table_2
CDKAL1	Type_2_Diabetes	Mohlke_and_Boehnke_2015_Table_2
HFE	Type_2_Diabetes	Mohlke_and_Boehnke_2015_Table_2
UHRF1BP1	Type_2_Diabetes	Mohlke_and_Boehnke_2015_Table_2
GLP1R	Type_2_Diabetes	Mohlke_and_Boehnke_2015_Table_2
MYB	Type_2_Diabetes	Mohlke_and_Boehnke_2015_Table_2
RSPO3	Type_2_Diabetes	Mohlke_and_Boehnke_2015_Table_2
HBS1L	Type_2_Diabetes	Mohlke_and_Boehnke_2015_Table_2
TMEM195	Type_2_Diabetes	Mohlke_and_Boehnke_2015_Table_2
GCK	Type_2_Diabetes	Mohlke_and_Boehnke_2015_Table_2
GRB10	Type_2_Diabetes	Mohlke_and_Boehnke_2015_Table_2
HIP1	Type_2_Diabetes	Mohlke_and_Boehnke_2015_Table_2
PPP1R3B	Type_2_Diabetes	Mohlke_and_Boehnke_2015_Table_2
ANK1	Type_2_Diabetes	Mohlke_and_Boehnke_2015_Table_2
SLC30A8	Type_2_Diabetes	Mohlke_and_Boehnke_2015_Table_2
KANK1	Type_2_Diabetes	Mohlke_and_Boehnke_2015_Table_2
GLIS3	Type_2_Diabetes	Mohlke_and_Boehnke_2015_Table_2
CDKN2B	Type_2_Diabetes	Mohlke_and_Boehnke_2015_Table_2
CDKN2A	Type_2_Diabetes	Mohlke_and_Boehnke_2015_Table_2
IKBKAP	Type_2_Diabetes	Mohlke_and_Boehnke_2015_Table_2
DDX31	Type_2_Diabetes	Mohlke_and_Boehnke_2015_Table_2
ABO	Type_2_Diabetes	Mohlke_and_Boehnke_2015_Table_2
DNLZ	Type_2_Diabetes	Mohlke_and_Boehnke_2015_Table_2
HK1	Type_2_Diabetes	Mohlke_and_Boehnke_2015_Table_2
ADRA2A	Type_2_Diabetes	Mohlke_and_Boehnke_2015_Table_2
TCF7L2	Type_2_Diabetes	Mohlke_and_Boehnke_2015_Table_2
TCERG1L	Type_2_Diabetes	Mohlke_and_Boehnke_2015_Table_2
CRY2	Type_2_Diabetes	Mohlke_and_Boehnke_2015_Table_2
MADD	Type_2_Diabetes	Mohlke_and_Boehnke_2015_Table_2
OR4S1	Type_2_Diabetes	Mohlke_and_Boehnke_2015_Table_2
FADS1	Type_2_Diabetes	Mohlke_and_Boehnke_2015_Table_2
ARAP1	Type_2_Diabetes	Mohlke_and_Boehnke_2015_Table_2
MTNR1B	Type_2_Diabetes	Mohlke_and_Boehnke_2015_Table_2
GLS2	Type_2_Diabetes	Mohlke_and_Boehnke_2015_Table_2
TBC1D30	Type_2_Diabetes	Mohlke_and_Boehnke_2015_Table_2
IGF1	Type_2_Diabetes	Mohlke_and_Boehnke_2015_Table_2
MYL2	Type_2_Diabetes	Mohlke_and_Boehnke_2015_Table_2
C12orf51	Type_2_Diabetes	Mohlke_and_Boehnke_2015_Table_2
OAS1	Type_2_Diabetes	Mohlke_and_Boehnke_2015_Table_2
P2RX2	Type_2_Diabetes	Mohlke_and_Boehnke_2015_Table_2
PDX1	Type_2_Diabetes	Mohlke_and_Boehnke_2015_Table_2
KL	Type_2_Diabetes	Mohlke_and_Boehnke_2015_Table_2
TBC1D4	Type_2_Diabetes	Mohlke_and_Boehnke_2015_Table_2
ATP11A	Type_2_Diabetes	Mohlke_and_Boehnke_2015_Table_2
WARS	Type_2_Diabetes	Mohlke_and_Boehnke_2015_Table_2
C2CD4A	Type_2_Diabetes	Mohlke_and_Boehnke_2015_Table_2
C2CD4B	Type_2_Diabetes	Mohlke_and_Boehnke_2015_Table_2
LARP6	Type_2_Diabetes	Mohlke_and_Boehnke_2015_Table_2
IGF1R	Type_2_Diabetes	Mohlke_and_Boehnke_2015_Table_2
FTO	Type_2_Diabetes	Mohlke_and_Boehnke_2015_Table_2
CYBA	Type_2_Diabetes	Mohlke_and_Boehnke_2015_Table_2
SGSM2	Type_2_Diabetes	Mohlke_and_Boehnke_2015_Table_2
FN3K	Type_2_Diabetes	Mohlke_and_Boehnke_2015_Table_2
MYO9B	Type_2_Diabetes	Mohlke_and_Boehnke_2015_Table_2
PEPD	Type_2_Diabetes	Mohlke_and_Boehnke_2015_Table_2
GIPR	Type_2_Diabetes	Mohlke_and_Boehnke_2015_Table_2
FOXA2	Type_2_Diabetes	Mohlke_and_Boehnke_2015_Table_2
TOP1	Type_2_Diabetes	Mohlke_and_Boehnke_2015_Table_2
TMPRSS6	Type_2_Diabetes	Mohlke_and_Boehnke_2015_Table_2
REG1B	Type_2_Diabetes	Fadista_et_al_2014_Table_S2
TPT1	Type_2_Diabetes	Fadista_et_al_2014_Table_S2
PRSS1	Type_2_Diabetes	Fadista_et_al_2014_Table_S2
CPA1	Type_2_Diabetes	Fadista_et_al_2014_Table_S2
INS	Type_2_Diabetes	Fadista_et_al_2014_Table_S2
CPE	Type_2_Diabetes	Fadista_et_al_2014_Table_S2
IAPP	Type_2_Diabetes	Fadista_et_al_2014_Table_S2
GNAS	Type_2_Diabetes	Fadista_et_al_2014_Table_S2
PDX1	Monogenic_Diabetes	Schwitzgebel_2014_Table_1	Pancreatic agenesis, MODY
PTF1A	Monogenic_Diabetes	Schwitzgebel_2014_Table_1	Pancreas and cerebellar agenesis
GLIS3	Monogenic_Diabetes	Schwitzgebel_2014_Table_1	PNDM
NGN3	Monogenic_Diabetes	Schwitzgebel_2014_Table_1	PNDM
RFX6	Monogenic_Diabetes	Schwitzgebel_2014_Table_1	PNDM
GATA6	Monogenic_Diabetes	Schwitzgebel_2014_Table_1	PNDM, MODY
GATA4	Monogenic_Diabetes	Schwitzgebel_2014_Table_1	Pancreatic agenesis
NEUROD1	Monogenic_Diabetes	Schwitzgebel_2014_Table_1	PNDM, MODY
PAX6	Monogenic_Diabetes	Schwitzgebel_2014_Table_1	PNDM
PAX4	Monogenic_Diabetes	Schwitzgebel_2014_Table_1	MODY
HNF1B	Monogenic_Diabetes	Schwitzgebel_2014_Table_1	PNDM and pancreas hypoplasia
MNX1	Monogenic_Diabetes	Schwitzgebel_2014_Table_1	PNDM
KLF11	Monogenic_Diabetes	Schwitzgebel_2014_Table_1	MODY
HNF1A	Monogenic_Diabetes	Schwitzgebel_2014_Table_1	Adolescent diabetes
HNF4A	Monogenic_Diabetes	Schwitzgebel_2014_Table_1	MODY
SLC2A2	Monogenic_Diabetes	Schwitzgebel_2014_Table_1	PNDM, TNDM
GCK	Monogenic_Diabetes	Schwitzgebel_2014_Table_1	PNDM, MODY
SLC19A2	Monogenic_Diabetes	Schwitzgebel_2014_Table_1	PNDM
SLC29A3	Monogenic_Diabetes	Schwitzgebel_2014_Table_1	Diabetes, pigmented hypertrichosis
WFS1	Monogenic_Diabetes	Schwitzgebel_2014_Table_1	Wolfram syndrome 1, MODY
CISD2	Monogenic_Diabetes	Schwitzgebel_2014_Table_1	Wolfram syndrome 2
EIF2AK3	Monogenic_Diabetes	Schwitzgebel_2014_Table_1	PNDM, Wollcot-Rallison syndrome
IER3IP1	Monogenic_Diabetes	Schwitzgebel_2014_Table_1	PNDM, microcephaly, epilepshy--MEDS syndrome
INS	Monogenic_Diabetes	Schwitzgebel_2014_Table_1	PNDM, TNDM, MODY
BLK	Monogenic_Diabetes	Schwitzgebel_2014_Table_1	MODY
KCNJ11	Monogenic_Diabetes	Schwitzgebel_2014_Table_1	PNDM, TNDM, MODY
ABCC8	Monogenic_Diabetes	Schwitzgebel_2014_Table_1	PNDM, TNDM, MODY
CEL	Monogenic_Diabetes	Schwitzgebel_2014_Table_1	MODY, exocrine insufficiency
NEUROG3	Monogenic_Diabetes	Schwitzgebel_2014_Table_1	PNDM
GLUD1	Monogenic_Diabetes	Senniappan_et_al_2013	Congenital Hyperinsulinemia
SLC16A1	Monogenic_Diabetes	Senniappan_et_al_2013	Congenital Hyperinsulinemia
UCP2	Monogenic_Diabetes	Senniappan_et_al_2013	Congenital Hyperinsulinemia
HADH	Monogenic_Diabetes	Senniappan_et_al_2013	Congenital Hyperinsulinemia
PLAGL1	Monogenic_Diabetes	Hoffman_and_Spengler_2012	TNDM
HYMAI	Monogenic_Diabetes	Hoffman_and_Spengler_2012	TNDM

## Sheet: eQTL_List
Gene_Symbol	Category	Study
MTNR1B	T2D GWAS_eQTL_	Lyssenko_et_al_ 2009; Fadista_et_al_2014
TCF7L2	T2D GWAS_eQTL	Dayeh_et_al_2013
ARAP1	T2D GWAS_eQTL	Kulzer_et_al_2014
STARD10	T2D GWAS_eQTL	van_de_Bunt_et_al_2015
ADCY5	T2D GWAS_eQTL	van_de_Bunt_et_al_2015
ADRA2A	T2D GWAS_eQTL	Dupuis_et_al_2010
ERAP2	T2D GWAS_eQTL	Fadista_et_al_2014
CAMK1D	T2D GWAS_eQTL	van_de_Bunt_et_al_2015
G6PC2	T2D GWAS_eQTL	Fadista_et_al_2014
AP3S2	T2D GWAS_eQTL	Fadista_et_al_2014
ABO	T2D GWAS_eQTL	Fadista_et_al_2014
KCNK17	T2D GWAS_eQTL	Fadista_et_al_2014
LDHC	T2D_cis_eQTL	Fadista_et_al_2014_Table_S8
TYW1B	T2D_cis_eQTL	Fadista_et_al_2014_Table_S8
ERAP2	T2D_cis_eQTL	Fadista_et_al_2014_Table_S8
XRRA1	T2D_cis_eQTL	Fadista_et_al_2014_Table_S8
HS3ST4	T2D_cis_eQTL	Fadista_et_al_2014_Table_S8
PRPH2	T2D_cis_eQTL	Fadista_et_al_2014_Table_S8
ERV3	T2D_cis_eQTL	Fadista_et_al_2014_Table_S8
ZNF880	T2D_cis_eQTL	Fadista_et_al_2014_Table_S8
ZNF117	T2D_cis_eQTL	Fadista_et_al_2014_Table_S8
CSMD1	T2D_cis_eQTL	Fadista_et_al_2014_Table_S8
C15orf23	T2D_cis_eQTL	Fadista_et_al_2014_Table_S8
ERMN	T2D_cis_eQTL	Fadista_et_al_2014_Table_S8
HLA-H	T2D_cis_eQTL	Fadista_et_al_2014_Table_S8
HLA-DRB5	T2D_cis_eQTL	Fadista_et_al_2014_Table_S8
ZP3	T2D_cis_eQTL	Fadista_et_al_2014_Table_S8
ABCC13	T2D_cis_eQTL	Fadista_et_al_2014_Table_S8
HCG2P7	T2D_cis_eQTL	Fadista_et_al_2014_Table_S8
LOC643406	T2D_cis_eQTL	Fadista_et_al_2014_Table_S8
XKR9	T2D_cis_eQTL	Fadista_et_al_2014_Table_S8
TUBBP5	T2D_cis_eQTL	Fadista_et_al_2014_Table_S8
HLA-DRB6	T2D_cis_eQTL	Fadista_et_al_2014_Table_S8
FAM154B	T2D_cis_eQTL	Fadista_et_al_2014_Table_S8
LOC401233	T2D_cis_eQTL	Fadista_et_al_2014_Table_S8
C1QL3	T2D_cis_eQTL	Fadista_et_al_2014_Table_S8
POMZP3	T2D_cis_eQTL	Fadista_et_al_2014_Table_S8
DDX11L2	T2D_cis_eQTL	Fadista_et_al_2014_Table_S8
EFCAB2	T2D_cis_eQTL	Fadista_et_al_2014_Table_S8
LOC441666	T2D_cis_eQTL	Fadista_et_al_2014_Table_S8
ST8SIA6	T2D_cis_eQTL	Fadista_et_al_2014_Table_S8
ARL17A	T2D_cis_eQTL	Fadista_et_al_2014_Table_S8
ARL17B	T2D_cis_eQTL	Fadista_et_al_2014_Table_S8
CCDC163P	T2D_cis_eQTL	Fadista_et_al_2014_Table_S8
HLA-DRB1	T2D_cis_eQTL	Fadista_et_al_2014_Table_S8
GPX7	T2D_cis_eQTL	Fadista_et_al_2014_Table_S8
AGAP7	T2D_cis_eQTL	Fadista_et_al_2014_Table_S8
C17orf97	T2D_cis_eQTL	Fadista_et_al_2014_Table_S8
ZFP57	T2D_cis_eQTL	Fadista_et_al_2014_Table_S8
PDZK1IP1	T2D_cis_eQTL	Fadista_et_al_2014_Table_S8
AP3S2	T2D_cis_eQTL	Fadista_et_al_2014_Table_S8
HLA-DMA	T2D_cis_eQTL	Fadista_et_al_2014_Table_S8
TCL6	T2D_cis_eQTL	Fadista_et_al_2014_Table_S8
OPN1SW	T2D_cis_eQTL	Fadista_et_al_2014_Table_S8
C9orf130	T2D_cis_eQTL	Fadista_et_al_2014_Table_S8
REP15	T2D_cis_eQTL	Fadista_et_al_2014_Table_S8
HLA-DRA	T2D_cis_eQTL	Fadista_et_al_2014_Table_S8
FAHD1	T2D_cis_eQTL	Fadista_et_al_2014_Table_S8
APOBEC3G	T2D_cis_eQTL	Fadista_et_al_2014_Table_S8
TRAPPC4	T2D_cis_eQTL	Fadista_et_al_2014_Table_S8
MIR3656	T2D_cis_eQTL	Fadista_et_al_2014_Table_S8
KIAA1267	T2D_cis_eQTL	Fadista_et_al_2014_Table_S8
OR7D2	T2D_cis_eQTL	Fadista_et_al_2014_Table_S8
THNSL2	T2D_cis_eQTL	Fadista_et_al_2014_Table_S8
LOC644246	T2D_cis_eQTL	Fadista_et_al_2014_Table_S8
C2orf74	T2D_cis_eQTL	Fadista_et_al_2014_Table_S8
MYOM2	T2D_cis_eQTL	Fadista_et_al_2014_Table_S8
C9orf135	T2D_cis_eQTL	Fadista_et_al_2014_Table_S8
FERD3L	T2D_cis_eQTL	Fadista_et_al_2014_Table_S8
CECR1	T2D_cis_eQTL	Fadista_et_al_2014_Table_S8
C5orf35	T2D_cis_eQTL	Fadista_et_al_2014_Table_S8
TFB1M	T2D_cis_eQTL	Fadista_et_al_2014_Table_S8
LOC388796	T2D_cis_eQTL	Fadista_et_al_2014_Table_S8
ULK4	T2D_cis_eQTL	Fadista_et_al_2014_Table_S8
APBB1IP	T2D_cis_eQTL	Fadista_et_al_2014_Table_S8
MGC39372	T2D_cis_eQTL	Fadista_et_al_2014_Table_S8
TMED6	T2D_cis_eQTL	Fadista_et_al_2014_Table_S8
IQCB1	T2D_cis_eQTL	Fadista_et_al_2014_Table_S8
DLL1	T2D_cis_eQTL	Fadista_et_al_2014_Table_S8
FLJ40852	T2D_cis_eQTL	Fadista_et_al_2014_Table_S8
ENOSF1	T2D_cis_eQTL	Fadista_et_al_2014_Table_S8
ZNF100	T2D_cis_eQTL	Fadista_et_al_2014_Table_S8
LOC100125556	T2D_cis_eQTL	Fadista_et_al_2014_Table_S8
CDSN	T2D_cis_eQTL	Fadista_et_al_2014_Table_S8
RPL23AP7	T2D_cis_eQTL	Fadista_et_al_2014_Table_S8
HLA-A	T2D_cis_eQTL	Fadista_et_al_2014_Table_S8
NCRNA00292	T2D_cis_eQTL	Fadista_et_al_2014_Table_S8
C10orf107	T2D_cis_eQTL	Fadista_et_al_2014_Table_S8
PON1	T2D_cis_eQTL	Fadista_et_al_2014_Table_S8
SLC44A5	T2D_cis_eQTL	Fadista_et_al_2014_Table_S8
TDRD5	T2D_cis_eQTL	Fadista_et_al_2014_Table_S8
NQO2	T2D_cis_eQTL	Fadista_et_al_2014_Table_S8
C2orf84	T2D_cis_eQTL	Fadista_et_al_2014_Table_S8
SYPL2	T2D_cis_eQTL	Fadista_et_al_2014_Table_S8
MRPL42P5	T2D_cis_eQTL	Fadista_et_al_2014_Table_S8
LOC339290	T2D_cis_eQTL	Fadista_et_al_2014_Table_S8
GBP3	T2D_cis_eQTL	Fadista_et_al_2014_Table_S8
HLA-DQB1	T2D_cis_eQTL	Fadista_et_al_2014_Table_S8
ST7L	T2D_cis_eQTL	Fadista_et_al_2014_Table_S8
TAPBPL	T2D_cis_eQTL	Fadista_et_al_2014_Table_S8
HSPC157	T2D_cis_eQTL	Fadista_et_al_2014_Table_S8
LOC339822	T2D_cis_eQTL	Fadista_et_al_2014_Table_S8
STOX1	T2D_cis_eQTL	Fadista_et_al_2014_Table_S8
CRIPAK	T2D_cis_eQTL	Fadista_et_al_2014_Table_S8
LOC654433	T2D_cis_eQTL	Fadista_et_al_2014_Table_S8
NDUFV3	T2D_cis_eQTL	Fadista_et_al_2014_Table_S8
FAM182B	T2D_cis_eQTL	Fadista_et_al_2014_Table_S8
LRRC37A2	T2D_cis_eQTL	Fadista_et_al_2014_Table_S8
CYP3A5	T2D_cis_eQTL	Fadista_et_al_2014_Table_S8
LOC100499177	T2D_cis_eQTL	Fadista_et_al_2014_Table_S8
DDX11	T2D_cis_eQTL	Fadista_et_al_2014_Table_S8
HLA-B	T2D_cis_eQTL	Fadista_et_al_2014_Table_S8
MAG	T2D_cis_eQTL	Fadista_et_al_2014_Table_S8
ELFN2	T2D_cis_eQTL	Fadista_et_al_2014_Table_S8
ITGB3BP	T2D_cis_eQTL	Fadista_et_al_2014_Table_S8
SNHG5	T2D_cis_eQTL	Fadista_et_al_2014_Table_S8
HLA-C	T2D_cis_eQTL	Fadista_et_al_2014_Table_S8
DDTL	T2D_cis_eQTL	Fadista_et_al_2014_Table_S8
ACSM1	T2D_cis_eQTL	Fadista_et_al_2014_Table_S8
LOC338651	T2D_cis_eQTL	Fadista_et_al_2014_Table_S8
CHURC1	T2D_cis_eQTL	Fadista_et_al_2014_Table_S8
AKAP3	T2D_cis_eQTL	Fadista_et_al_2014_Table_S8
MIR578	T2D_cis_eQTL	Fadista_et_al_2014_Table_S8
PCDHB8	T2D_cis_eQTL	Fadista_et_al_2014_Table_S8
CIB2	T2D_cis_eQTL	Fadista_et_al_2014_Table_S8
C15orf57	T2D_cis_eQTL	Fadista_et_al_2014_Table_S8
FAM178B	T2D_cis_eQTL	Fadista_et_al_2014_Table_S8
SRR	T2D_cis_eQTL	Fadista_et_al_2014_Table_S8
KLRC1	T2D_cis_eQTL	Fadista_et_al_2014_Table_S8
KHDC1	T2D_cis_eQTL	Fadista_et_al_2014_Table_S8
GUSBP1	T2D_cis_eQTL	Fadista_et_al_2014_Table_S8
FGF23	T2D_cis_eQTL	Fadista_et_al_2014_Table_S8
APOL4	T2D_cis_eQTL	Fadista_et_al_2014_Table_S8
BMP10	T2D_cis_eQTL	Fadista_et_al_2014_Table_S8
IP6K3	T2D_cis_eQTL	Fadista_et_al_2014_Table_S8
FAM124A	T2D_cis_eQTL	Fadista_et_al_2014_Table_S8
FOXRED1	T2D_cis_eQTL	Fadista_et_al_2014_Table_S8
DNAJC15	T2D_cis_eQTL	Fadista_et_al_2014_Table_S8
L1TD1	T2D_cis_eQTL	Fadista_et_al_2014_Table_S8
ATP2C2	T2D_cis_eQTL	Fadista_et_al_2014_Table_S8
LOC389705	T2D_cis_eQTL	Fadista_et_al_2014_Table_S8
SIGLEC12	T2D_cis_eQTL	Fadista_et_al_2014_Table_S8
LOC253039	T2D_cis_eQTL	Fadista_et_al_2014_Table_S8
PGM5	T2D_cis_eQTL	Fadista_et_al_2014_Table_S8
LRRIQ3	T2D_cis_eQTL	Fadista_et_al_2014_Table_S8
KSR2	T2D_cis_eQTL	Fadista_et_al_2014_Table_S8
MAP6D1	T2D_cis_eQTL	Fadista_et_al_2014_Table_S8
AGBL1	T2D_cis_eQTL	Fadista_et_al_2014_Table_S8
FAIM3	T2D_cis_eQTL	Fadista_et_al_2014_Table_S8
TLR6	T2D_cis_eQTL	Fadista_et_al_2014_Table_S8
NAAA	T2D_cis_eQTL	Fadista_et_al_2014_Table_S8
HLA-DQA1	T2D_cis_eQTL	Fadista_et_al_2014_Table_S8
SH3YL1	T2D_cis_eQTL	Fadista_et_al_2014_Table_S8
LOC100144603	T2D_cis_eQTL	Fadista_et_al_2014_Table_S8
NTPCR	T2D_cis_eQTL	Fadista_et_al_2014_Table_S8
SNX32	T2D_cis_eQTL	Fadista_et_al_2014_Table_S8
RTL1	T2D_cis_eQTL	Fadista_et_al_2014_Table_S8
PPIL3	T2D_cis_eQTL	Fadista_et_al_2014_Table_S8
LOC285733	T2D_cis_eQTL	Fadista_et_al_2014_Table_S8
LOC100128164	T2D_cis_eQTL	Fadista_et_al_2014_Table_S8
SNORD89	T2D_cis_eQTL	Fadista_et_al_2014_Table_S8
NBR2	T2D_cis_eQTL	Fadista_et_al_2014_Table_S8
TSGA10	T2D_cis_eQTL	Fadista_et_al_2014_Table_S8
PAQR6	T2D_cis_eQTL	Fadista_et_al_2014_Table_S8
GSTM1	T2D_cis_eQTL	Fadista_et_al_2014_Table_S8
CCBL2	T2D_cis_eQTL	Fadista_et_al_2014_Table_S8
RBMXL1	T2D_cis_eQTL	Fadista_et_al_2014_Table_S8
HEPHL1	T2D_cis_eQTL	Fadista_et_al_2014_Table_S8
RPS26	T2D_cis_eQTL	Fadista_et_al_2014_Table_S8
MICB	T2D_cis_eQTL	Fadista_et_al_2014_Table_S8
GSTM3	T2D_cis_eQTL	Fadista_et_al_2014_Table_S8
FBXO2	T2D_cis_eQTL	Fadista_et_al_2014_Table_S8
LOC728613	T2D_cis_eQTL	Fadista_et_al_2014_Table_S8
TTC12	T2D_cis_eQTL	Fadista_et_al_2014_Table_S8
SRD5A3	T2D_cis_eQTL	Fadista_et_al_2014_Table_S8
SNX19	T2D_cis_eQTL	Fadista_et_al_2014_Table_S8
FAM118A	T2D_cis_eQTL	Fadista_et_al_2014_Table_S8
LY75	T2D_cis_eQTL	Fadista_et_al_2014_Table_S8
C7orf28B	T2D_cis_eQTL	Fadista_et_al_2014_Table_S8
PSORS1C1	T2D_cis_eQTL	Fadista_et_al_2014_Table_S8
LOC390595	T2D_cis_eQTL	Fadista_et_al_2014_Table_S8
C2orf73	T2D_cis_eQTL	Fadista_et_al_2014_Table_S8
LOC645752	T2D_cis_eQTL	Fadista_et_al_2014_Table_S8
ABO	T2D_cis_eQTL	Fadista_et_al_2014_Table_S8
VTRNA1-2	T2D_cis_eQTL	Fadista_et_al_2014_Table_S8
FLJ35024	T2D_cis_eQTL	Fadista_et_al_2014_Table_S8
DHFR	T2D_cis_eQTL	Fadista_et_al_2014_Table_S8
SV2B	T2D_cis_eQTL	Fadista_et_al_2014_Table_S8
ADCY4	T2D_cis_eQTL	Fadista_et_al_2014_Table_S8
KCNK17	T2D_cis_eQTL	Fadista_et_al_2014_Table_S8
ATP6AP1L	T2D_cis_eQTL	Fadista_et_al_2014_Table_S8
NCRNA00207	T2D_cis_eQTL	Fadista_et_al_2014_Table_S8
FLJ41200	T2D_cis_eQTL	Fadista_et_al_2014_Table_S8
LOC100292680	T2D_cis_eQTL	Fadista_et_al_2014_Table_S8
HCG9	T2D_cis_eQTL	Fadista_et_al_2014_Table_S8
ESPNL	T2D_cis_eQTL	Fadista_et_al_2014_Table_S8
TMEM90A	T2D_cis_eQTL	Fadista_et_al_2014_Table_S8
DKFZp566F0947	T2D_cis_eQTL	Fadista_et_al_2014_Table_S8
SLC1A6	T2D_cis_eQTL	Fadista_et_al_2014_Table_S8
WARS2	T2D_cis_eQTL	Fadista_et_al_2014_Table_S8
LOC728554	T2D_cis_eQTL	Fadista_et_al_2014_Table_S8
THSD7B	T2D_cis_eQTL	Fadista_et_al_2014_Table_S8
FAM162B	T2D_cis_eQTL	Fadista_et_al_2014_Table_S8
ZNF107	T2D_cis_eQTL	Fadista_et_al_2014_Table_S8
ZNF584	T2D_cis_eQTL	Fadista_et_al_2014_Table_S8
HSPA12A	T2D_cis_eQTL	Fadista_et_al_2014_Table_S8
HLA-DQA2	T2D_cis_eQTL	Fadista_et_al_2014_Table_S8
EDN2	T2D_cis_eQTL	Fadista_et_al_2014_Table_S8
BTNL2	T2D_cis_eQTL	Fadista_et_al_2014_Table_S8
TM7SF4	T2D_cis_eQTL	Fadista_et_al_2014_Table_S8
SLC41A3	T2D_cis_eQTL	Fadista_et_al_2014_Table_S8
FANCF	T2D_cis_eQTL	Fadista_et_al_2014_Table_S8
EFCAB1	T2D_cis_eQTL	Fadista_et_al_2014_Table_S8
LOC401164	T2D_cis_eQTL	Fadista_et_al_2014_Table_S8
COL13A1	T2D_cis_eQTL	Fadista_et_al_2014_Table_S8
PTPLAD2	T2D_cis_eQTL	Fadista_et_al_2014_Table_S8
MTNR1B	T2D_cis_eQTL	Fadista_et_al_2014_Table_S8
ARHGAP40	T2D_cis_eQTL	Fadista_et_al_2014_Table_S8
ERAP1	T2D_cis_eQTL	Fadista_et_al_2014_Table_S8
NUDT2	T2D_cis_eQTL	Fadista_et_al_2014_Table_S8
LOC595101	T2D_cis_eQTL	Fadista_et_al_2014_Table_S8
KIF6	T2D_cis_eQTL	Fadista_et_al_2014_Table_S8
VWDE	T2D_cis_eQTL	Fadista_et_al_2014_Table_S8
ZFAND2A	T2D_cis_eQTL	Fadista_et_al_2014_Table_S8
LRRTM2	T2D_cis_eQTL	Fadista_et_al_2014_Table_S8
C2orf54	T2D_cis_eQTL	Fadista_et_al_2014_Table_S8
LILRA2	T2D_cis_eQTL	Fadista_et_al_2014_Table_S8
C1orf173	T2D_cis_eQTL	Fadista_et_al_2014_Table_S8
MCOLN3	T2D_cis_eQTL	Fadista_et_al_2014_Table_S8
C9orf152	T2D_cis_eQTL	Fadista_et_al_2014_Table_S8
FMN1	T2D_cis_eQTL	Fadista_et_al_2014_Table_S8
GPR149	T2D_cis_eQTL	Fadista_et_al_2014_Table_S8
AMDHD1	T2D_cis_eQTL	Fadista_et_al_2014_Table_S8
CCDC85A	T2D_cis_eQTL	Fadista_et_al_2014_Table_S8
CELA2B	T2D_cis_eQTL	Fadista_et_al_2014_Table_S8
MICA	T2D_cis_eQTL	Fadista_et_al_2014_Table_S8
SLC1A7	T2D_cis_eQTL	Fadista_et_al_2014_Table_S8
OR3A2	T2D_cis_eQTL	Fadista_et_al_2014_Table_S8
RWDD2B	T2D_cis_eQTL	Fadista_et_al_2014_Table_S8
SLC2A9	T2D_cis_eQTL	Fadista_et_al_2014_Table_S8
HLA-DQB2	T2D_cis_eQTL	Fadista_et_al_2014_Table_S8
FLJ23152	T2D_cis_eQTL	Fadista_et_al_2014_Table_S8
ZNF286B	T2D_cis_eQTL	Fadista_et_al_2014_Table_S8
FOXO3B	T2D_cis_eQTL	Fadista_et_al_2014_Table_S8
NDUFB7	T2D_cis_eQTL	Fadista_et_al_2014_Table_S8
PAX8	T2D_cis_eQTL	Fadista_et_al_2014_Table_S8
LRRC69	T2D_cis_eQTL	Fadista_et_al_2014_Table_S8
NTNG1	T2D_cis_eQTL	Fadista_et_al_2014_Table_S8
ADAM32	T2D_cis_eQTL	Fadista_et_al_2014_Table_S8
STYXL1	T2D_cis_eQTL	Fadista_et_al_2014_Table_S8
NFATC4	T2D_cis_eQTL	Fadista_et_al_2014_Table_S8
TRMT61B	T2D_cis_eQTL	Fadista_et_al_2014_Table_S8
KCNA1	T2D_cis_eQTL	Fadista_et_al_2014_Table_S8
AKAP2	T2D_cis_eQTL	Fadista_et_al_2014_Table_S8
CNTLN	T2D_cis_eQTL	Fadista_et_al_2014_Table_S8
CMAH	T2D_cis_eQTL	Fadista_et_al_2014_Table_S8
C11orf54	T2D_cis_eQTL	Fadista_et_al_2014_Table_S8
PSG4	T2D_cis_eQTL	Fadista_et_al_2014_Table_S8
SURF1	T2D_cis_eQTL	Fadista_et_al_2014_Table_S8
CLIC6	T2D_cis_eQTL	Fadista_et_al_2014_Table_S8
AOAH	T2D_cis_eQTL	Fadista_et_al_2014_Table_S8
KCNK13	T2D_cis_eQTL	Fadista_et_al_2014_Table_S8
FAM119B	T2D_cis_eQTL	Fadista_et_al_2014_Table_S8
LOC100131067	T2D_cis_eQTL	Fadista_et_al_2014_Table_S8
SIGLEC16	T2D_cis_eQTL	Fadista_et_al_2014_Table_S8
GLIPR1L2	T2D_cis_eQTL	Fadista_et_al_2014_Table_S8
C4orf33	T2D_cis_eQTL	Fadista_et_al_2014_Table_S8
HTR2B	T2D_cis_eQTL	Fadista_et_al_2014_Table_S8
LOC220594	T2D_cis_eQTL	Fadista_et_al_2014_Table_S8
EXOSC6	T2D_cis_eQTL	Fadista_et_al_2014_Table_S8
XRCC6BP1	T2D_cis_eQTL	Fadista_et_al_2014_Table_S8
ACP6	T2D_cis_eQTL	Fadista_et_al_2014_Table_S8
DKFZP686I15217	T2D_cis_eQTL	Fadista_et_al_2014_Table_S8
NPY1R	T2D_cis_eQTL	Fadista_et_al_2014_Table_S8
C3orf31	T2D_cis_eQTL	Fadista_et_al_2014_Table_S8
TSFM	T2D_cis_eQTL	Fadista_et_al_2014_Table_S8
LOC100128023	T2D_cis_eQTL	Fadista_et_al_2014_Table_S8
HSD17B12	T2D_cis_eQTL	Fadista_et_al_2014_Table_S8
C17orf57	T2D_cis_eQTL	Fadista_et_al_2014_Table_S8
LRFN3	T2D_cis_eQTL	Fadista_et_al_2014_Table_S8
LOC151658	T2D_cis_eQTL	Fadista_et_al_2014_Table_S8
DAPK2	T2D_cis_eQTL	Fadista_et_al_2014_Table_S8
FILIP1	T2D_cis_eQTL	Fadista_et_al_2014_Table_S8
KY	T2D_cis_eQTL	Fadista_et_al_2014_Table_S8
ANO1	T2D_cis_eQTL	Fadista_et_al_2014_Table_S8
NLRP3	T2D_cis_eQTL	Fadista_et_al_2014_Table_S8
HLA-DPB1	T2D_cis_eQTL	Fadista_et_al_2014_Table_S8
CNN3	T2D_cis_eQTL	Fadista_et_al_2014_Table_S8
NOTCH2NL	T2D_cis_eQTL	Fadista_et_al_2014_Table_S8
LOC100128361	T2D_cis_eQTL	Fadista_et_al_2014_Table_S8
NT5E	T2D_cis_eQTL	Fadista_et_al_2014_Table_S8
AGA	T2D_cis_eQTL	Fadista_et_al_2014_Table_S8
ALMS1P	T2D_cis_eQTL	Fadista_et_al_2014_Table_S8
ZNF642	T2D_cis_eQTL	Fadista_et_al_2014_Table_S8
KCNJ6	T2D_cis_eQTL	Fadista_et_al_2014_Table_S8
DDX60L	T2D_cis_eQTL	Fadista_et_al_2014_Table_S8
COL2A1	T2D_cis_eQTL	Fadista_et_al_2014_Table_S8
KCNA4	T2D_cis_eQTL	Fadista_et_al_2014_Table_S8
JRK	T2D_cis_eQTL	Fadista_et_al_2014_Table_S8
DIO2	T2D_cis_eQTL	Fadista_et_al_2014_Table_S8
C15orf51	T2D_cis_eQTL	Fadista_et_al_2014_Table_S8
FBXL21	T2D_cis_eQTL	Fadista_et_al_2014_Table_S8
TMPRSS6	T2D_cis_eQTL	Fadista_et_al_2014_Table_S8
FRA10AC1	T2D_cis_eQTL	Fadista_et_al_2014_Table_S8
UBE2U	T2D_cis_eQTL	Fadista_et_al_2014_Table_S8
UCA1	T2D_cis_eQTL	Fadista_et_al_2014_Table_S8
RHD	T2D_cis_eQTL	Fadista_et_al_2014_Table_S8
DGCR9	T2D_cis_eQTL	Fadista_et_al_2014_Table_S8
FN3KRP	T2D_cis_eQTL	Fadista_et_al_2014_Table_S8
C6orf26	T2D_cis_eQTL	Fadista_et_al_2014_Table_S8
STAG3L4	T2D_cis_eQTL	Fadista_et_al_2014_Table_S8
BPGM	T2D_cis_eQTL	Fadista_et_al_2014_Table_S8
KCNK6	T2D_cis_eQTL	Fadista_et_al_2014_Table_S8
ADA	T2D_cis_eQTL	Fadista_et_al_2014_Table_S8
ADAMTSL1	T2D_cis_eQTL	Fadista_et_al_2014_Table_S8
DDC	T2D_cis_eQTL	Fadista_et_al_2014_Table_S8
CTRC	T2D_cis_eQTL	Fadista_et_al_2014_Table_S8
SERPINC1	T2D_cis_eQTL	Fadista_et_al_2014_Table_S8
LIPT1	T2D_cis_eQTL	Fadista_et_al_2014_Table_S8
FANCG	T2D_cis_eQTL	Fadista_et_al_2014_Table_S8
FLJ32224	T2D_cis_eQTL	Fadista_et_al_2014_Table_S8
SIRPD	T2D_cis_eQTL	Fadista_et_al_2014_Table_S8
HSPA4L	T2D_cis_eQTL	Fadista_et_al_2014_Table_S8
NDUFA3	T2D_cis_eQTL	Fadista_et_al_2014_Table_S8
PCP4	T2D_cis_eQTL	Fadista_et_al_2014_Table_S8
LOC283177	T2D_cis_eQTL	Fadista_et_al_2014_Table_S8
LOC100132707	T2D_cis_eQTL	Fadista_et_al_2014_Table_S8
RPL23AP53	T2D_cis_eQTL	Fadista_et_al_2014_Table_S8
UROS	T2D_cis_eQTL	Fadista_et_al_2014_Table_S8
PSORS1C3	T2D_cis_eQTL	Fadista_et_al_2014_Table_S8
ZNF215	T2D_cis_eQTL	Fadista_et_al_2014_Table_S8
NAPG	T2D_cis_eQTL	Fadista_et_al_2014_Table_S8
MRPL21	T2D_cis_eQTL	Fadista_et_al_2014_Table_S8
LOC100272217	T2D_cis_eQTL	Fadista_et_al_2014_Table_S8
GRIA4	T2D_cis_eQTL	Fadista_et_al_2014_Table_S8
PLCL1	T2D_cis_eQTL	Fadista_et_al_2014_Table_S8
CCR6	T2D_cis_eQTL	Fadista_et_al_2014_Table_S8
TLL2	T2D_cis_eQTL	Fadista_et_al_2014_Table_S8
ZNF300	T2D_cis_eQTL	Fadista_et_al_2014_Table_S8
PEX5L	T2D_cis_eQTL	Fadista_et_al_2014_Table_S8
C19orf40	T2D_cis_eQTL	Fadista_et_al_2014_Table_S8
DCTN5	T2D_cis_eQTL	Fadista_et_al_2014_Table_S8
VIT	T2D_cis_eQTL	Fadista_et_al_2014_Table_S8
CCL4L2	T2D_cis_eQTL	Fadista_et_al_2014_Table_S8
CCL4L1	T2D_cis_eQTL	Fadista_et_al_2014_Table_S8
LOC100128573	T2D_cis_eQTL	Fadista_et_al_2014_Table_S8
C10orf32	T2D_cis_eQTL	Fadista_et_al_2014_Table_S8
DMBT1	T2D_cis_eQTL	Fadista_et_al_2014_Table_S8
ZNF256	T2D_cis_eQTL	Fadista_et_al_2014_Table_S8
LOC348751	T2D_cis_eQTL	Fadista_et_al_2014_Table_S8
ABCB4	T2D_cis_eQTL	Fadista_et_al_2014_Table_S8
ADCY10	T2D_cis_eQTL	Fadista_et_al_2014_Table_S8
MYBPHL	T2D_cis_eQTL	Fadista_et_al_2014_Table_S8
MLH3	T2D_cis_eQTL	Fadista_et_al_2014_Table_S8
RFPL1S	T2D_cis_eQTL	Fadista_et_al_2014_Table_S8
CCDC37	T2D_cis_eQTL	Fadista_et_al_2014_Table_S8
LOC149837	T2D_cis_eQTL	Fadista_et_al_2014_Table_S8
LOC729852	T2D_cis_eQTL	Fadista_et_al_2014_Table_S8
SMEK2	T2D_cis_eQTL	Fadista_et_al_2014_Table_S8
PIBF1	T2D_cis_eQTL	Fadista_et_al_2014_Table_S8
GATC	T2D_cis_eQTL	Fadista_et_al_2014_Table_S8
CHRNE	T2D_cis_eQTL	Fadista_et_al_2014_Table_S8
EFHB	T2D_cis_eQTL	Fadista_et_al_2014_Table_S8
CYP4F24P	T2D_cis_eQTL	Fadista_et_al_2014_Table_S8
ZNF98	T2D_cis_eQTL	Fadista_et_al_2014_Table_S8
KCND3	T2D_cis_eQTL	Fadista_et_al_2014_Table_S8
RGS17	T2D_cis_eQTL	Fadista_et_al_2014_Table_S8
CCDC122	T2D_cis_eQTL	Fadista_et_al_2014_Table_S8
FBN2	T2D_cis_eQTL	Fadista_et_al_2014_Table_S8
IL21R	T2D_cis_eQTL	Fadista_et_al_2014_Table_S8
TSPAN12	T2D_cis_eQTL	Fadista_et_al_2014_Table_S8
C9orf43	T2D_cis_eQTL	Fadista_et_al_2014_Table_S8
OSGEP	T2D_cis_eQTL	Fadista_et_al_2014_Table_S8
FUT2	T2D_cis_eQTL	Fadista_et_al_2014_Table_S8
ACOT4	T2D_cis_eQTL	Fadista_et_al_2014_Table_S8
ZNF83	T2D_cis_eQTL	Fadista_et_al_2014_Table_S8
CXCL17	T2D_cis_eQTL	Fadista_et_al_2014_Table_S8
POGLUT1	T2D_cis_eQTL	Fadista_et_al_2014_Table_S8
LOC390940	T2D_cis_eQTL	Fadista_et_al_2014_Table_S8
MCMBP	T2D_cis_eQTL	Fadista_et_al_2014_Table_S8
LY86-AS1	T2D_cis_eQTL	Fadista_et_al_2014_Table_S8
LRRC23	T2D_cis_eQTL	Fadista_et_al_2014_Table_S8
FCER1A	T2D_cis_eQTL	Fadista_et_al_2014_Table_S8
FBXW8	T2D_cis_eQTL	Fadista_et_al_2014_Table_S8
LOC441204	T2D_cis_eQTL	Fadista_et_al_2014_Table_S8
PGLYRP4	T2D_cis_eQTL	Fadista_et_al_2014_Table_S8
MCOLN2	T2D_cis_eQTL	Fadista_et_al_2014_Table_S8
GPR111	T2D_cis_eQTL	Fadista_et_al_2014_Table_S8
NT5C3L	T2D_cis_eQTL	Fadista_et_al_2014_Table_S8
SLC19A3	T2D_cis_eQTL	Fadista_et_al_2014_Table_S8
PYROXD1	T2D_cis_eQTL	Fadista_et_al_2014_Table_S8
KIAA1024	T2D_cis_eQTL	Fadista_et_al_2014_Table_S8
OXER1	T2D_cis_eQTL	Fadista_et_al_2014_Table_S8
KLHDC7A	T2D_cis_eQTL	Fadista_et_al_2014_Table_S8
CDO1	T2D_cis_eQTL	Fadista_et_al_2014_Table_S8
NBPF3	T2D_cis_eQTL	Fadista_et_al_2014_Table_S8
DIO1	T2D_cis_eQTL	Fadista_et_al_2014_Table_S8
PM20D1	T2D_cis_eQTL	Fadista_et_al_2014_Table_S8
TPMT	T2D_cis_eQTL	Fadista_et_al_2014_Table_S8
CFHR3	T2D_cis_eQTL	Fadista_et_al_2014_Table_S8
C1orf156	T2D_cis_eQTL	Fadista_et_al_2014_Table_S8
TMEM45A	T2D_cis_eQTL	Fadista_et_al_2014_Table_S8
SLC12A8	T2D_cis_eQTL	Fadista_et_al_2014_Table_S8
SMC2	T2D_cis_eQTL	Fadista_et_al_2014_Table_S8
CRISP2	T2D_cis_eQTL	Fadista_et_al_2014_Table_S8
EPDR1	T2D_cis_eQTL	Fadista_et_al_2014_Table_S8
GPBP1	T2D_cis_eQTL	Fadista_et_al_2014_Table_S8
PVR	T2D_cis_eQTL	Fadista_et_al_2014_Table_S8
COG7	T2D_cis_eQTL	Fadista_et_al_2014_Table_S8
APOLD1	T2D_cis_eQTL	Fadista_et_al_2014_Table_S8
LSAMP	T2D_cis_eQTL	Fadista_et_al_2014_Table_S8
MCM8	T2D_cis_eQTL	Fadista_et_al_2014_Table_S8
FAM106A	T2D_cis_eQTL	Fadista_et_al_2014_Table_S8
RNF216L	T2D_cis_eQTL	Fadista_et_al_2014_Table_S8
HCG4	T2D_cis_eQTL	Fadista_et_al_2014_Table_S8
HNRNPL	T2D_cis_eQTL	Fadista_et_al_2014_Table_S8
C2orf71	T2D_cis_eQTL	Fadista_et_al_2014_Table_S8
C2orf43	T2D_cis_eQTL	Fadista_et_al_2014_Table_S8
LOC168474	T2D_cis_eQTL	Fadista_et_al_2014_Table_S8
DHX35	T2D_cis_eQTL	Fadista_et_al_2014_Table_S8
ZBTB32	T2D_cis_eQTL	Fadista_et_al_2014_Table_S8
CYP2C9	T2D_cis_eQTL	Fadista_et_al_2014_Table_S8
TMEM102	T2D_cis_eQTL	Fadista_et_al_2014_Table_S8
POLR2J3	T2D_cis_eQTL	Fadista_et_al_2014_Table_S8
KRT40	T2D_cis_eQTL	Fadista_et_al_2014_Table_S8
ST6GAL1	T2D_cis_eQTL	Fadista_et_al_2014_Table_S8
LOC400680	T2D_cis_eQTL	Fadista_et_al_2014_Table_S8
RAD21L1	T2D_cis_eQTL	Fadista_et_al_2014_Table_S8
EPHA4	T2D_cis_eQTL	Fadista_et_al_2014_Table_S8
ECE2	T2D_cis_eQTL	Fadista_et_al_2014_Table_S8
IKBKE	T2D_cis_eQTL	Fadista_et_al_2014_Table_S8
DIS3L	T2D_cis_eQTL	Fadista_et_al_2014_Table_S8
GABRA5	T2D_cis_eQTL	Fadista_et_al_2014_Table_S8
LGI3	T2D_cis_eQTL	Fadista_et_al_2014_Table_S8
FTSJ3	T2D_cis_eQTL	Fadista_et_al_2014_Table_S8
ARHGEF26	T2D_cis_eQTL	Fadista_et_al_2014_Table_S8
RIMS3	T2D_cis_eQTL	Fadista_et_al_2014_Table_S8
C8orf59	T2D_cis_eQTL	Fadista_et_al_2014_Table_S8
SPG21	T2D_cis_eQTL	Fadista_et_al_2014_Table_S8
CDC25A	T2D_cis_eQTL	Fadista_et_al_2014_Table_S8
FUT9	T2D_cis_eQTL	Fadista_et_al_2014_Table_S8
GNRHR	T2D_cis_eQTL	Fadista_et_al_2014_Table_S8
SRI	T2D_cis_eQTL	Fadista_et_al_2014_Table_S8
LOC645513	T2D_cis_eQTL	Fadista_et_al_2014_Table_S8
IL18	T2D_cis_eQTL	Fadista_et_al_2014_Table_S8
PLA2G2A	T2D_cis_eQTL	Fadista_et_al_2014_Table_S8
C21orf84	T2D_cis_eQTL	Fadista_et_al_2014_Table_S8
MMP7	T2D_cis_eQTL	Fadista_et_al_2014_Table_S8
DKFZp686O1327	T2D_cis_eQTL	Fadista_et_al_2014_Table_S8
CCDC67	T2D_cis_eQTL	Fadista_et_al_2014_Table_S8
C7orf46	T2D_cis_eQTL	Fadista_et_al_2014_Table_S8
RNF168	T2D_cis_eQTL	Fadista_et_al_2014_Table_S8
TAC4	T2D_cis_eQTL	Fadista_et_al_2014_Table_S8
PSRC1	T2D_cis_eQTL	Fadista_et_al_2014_Table_S8
DHRS4L2	T2D_cis_eQTL	Fadista_et_al_2014_Table_S8
DDO	T2D_cis_eQTL	Fadista_et_al_2014_Table_S8
LOC100271874	T2D_cis_eQTL	Fadista_et_al_2014_Table_S8
GLDC	T2D_cis_eQTL	Fadista_et_al_2014_Table_S8
MYEOV	T2D_cis_eQTL	Fadista_et_al_2014_Table_S8
STK11IP	T2D_cis_eQTL	Fadista_et_al_2014_Table_S8
KIAA0947	T2D_cis_eQTL	Fadista_et_al_2014_Table_S8
NOM1	T2D_cis_eQTL	Fadista_et_al_2014_Table_S8
EFHD1	T2D_cis_eQTL	Fadista_et_al_2014_Table_S8
FCGR2A	T2D_cis_eQTL	Fadista_et_al_2014_Table_S8
LOC100128398	T2D_cis_eQTL	Fadista_et_al_2014_Table_S8
C9orf66	T2D_cis_eQTL	Fadista_et_al_2014_Table_S8
ITPKB	T2D_cis_eQTL	Fadista_et_al_2014_Table_S8
CAB39L	T2D_cis_eQTL	Fadista_et_al_2014_Table_S8
SNX16	T2D_cis_eQTL	Fadista_et_al_2014_Table_S8
NARS2	T2D_cis_eQTL	Fadista_et_al_2014_Table_S8
POM121L2	T2D_cis_eQTL	Fadista_et_al_2014_Table_S8
PRKAG2	T2D_cis_eQTL	Fadista_et_al_2014_Table_S8
GRM7	T2D_cis_eQTL	Fadista_et_al_2014_Table_S8
PCP4L1	T2D_cis_eQTL	Fadista_et_al_2014_Table_S8
ARHGEF35	T2D_cis_eQTL	Fadista_et_al_2014_Table_S8
MIR184	T2D_cis_eQTL	Fadista_et_al_2014_Table_S8
TSPYL5	T2D_cis_eQTL	Fadista_et_al_2014_Table_S8
PPP1R1C	T2D_cis_eQTL	Fadista_et_al_2014_Table_S8
FGF9	T2D_cis_eQTL	Fadista_et_al_2014_Table_S8
COL6A4P2	T2D_cis_eQTL	Fadista_et_al_2014_Table_S8
ZNF670	T2D_cis_eQTL	Fadista_et_al_2014_Table_S8
RNF212	T2D_cis_eQTL	Fadista_et_al_2014_Table_S8
SPATA22	T2D_cis_eQTL	Fadista_et_al_2014_Table_S8
CHPT1	T2D_cis_eQTL	Fadista_et_al_2014_Table_S8
QSOX2	T2D_cis_eQTL	Fadista_et_al_2014_Table_S8
SGCA	T2D_cis_eQTL	Fadista_et_al_2014_Table_S8
TUBA8	T2D_cis_eQTL	Fadista_et_al_2014_Table_S8
DYDC1	T2D_cis_eQTL	Fadista_et_al_2014_Table_S8
AP4B1	T2D_cis_eQTL	Fadista_et_al_2014_Table_S8
TCF12	T2D_cis_eQTL	Fadista_et_al_2014_Table_S8
KCNJ5	T2D_cis_eQTL	Fadista_et_al_2014_Table_S8
SLC45A4	T2D_cis_eQTL	Fadista_et_al_2014_Table_S8
C9orf156	T2D_cis_eQTL	Fadista_et_al_2014_Table_S8
CCRN4L	T2D_cis_eQTL	Fadista_et_al_2014_Table_S8
CLIP4	T2D_cis_eQTL	Fadista_et_al_2014_Table_S8
OBSL1	T2D_cis_eQTL	Fadista_et_al_2014_Table_S8
GRHL1	T2D_cis_eQTL	Fadista_et_al_2014_Table_S8
MRGPRE	T2D_cis_eQTL	Fadista_et_al_2014_Table_S8
SUCLG2	T2D_cis_eQTL	Fadista_et_al_2014_Table_S8
POP5	T2D_cis_eQTL	Fadista_et_al_2014_Table_S8
MYH10	T2D_cis_eQTL	Fadista_et_al_2014_Table_S8
CYP1A2	T2D_cis_eQTL	Fadista_et_al_2014_Table_S8
CDC7	T2D_cis_eQTL	Fadista_et_al_2014_Table_S8
PCCB	T2D_cis_eQTL	Fadista_et_al_2014_Table_S8
AKR1E2	T2D_cis_eQTL	Fadista_et_al_2014_Table_S8
C6orf155	T2D_cis_eQTL	Fadista_et_al_2014_Table_S8
ATP12A	T2D_cis_eQTL	Fadista_et_al_2014_Table_S8
COPG2	T2D_cis_eQTL	Fadista_et_al_2014_Table_S8
TSGA13	T2D_cis_eQTL	Fadista_et_al_2014_Table_S8
CRYBB2P1	T2D_cis_eQTL	Fadista_et_al_2014_Table_S8
QPCT	T2D_cis_eQTL	Fadista_et_al_2014_Table_S8
TSHZ2	T2D_cis_eQTL	Fadista_et_al_2014_Table_S8
DCAF4	T2D_cis_eQTL	Fadista_et_al_2014_Table_S8
AGXT	T2D_cis_eQTL	Fadista_et_al_2014_Table_S8
CAT	T2D_cis_eQTL	Fadista_et_al_2014_Table_S8
LOC257396	T2D_cis_eQTL	Fadista_et_al_2014_Table_S8
TFF1	T2D_cis_eQTL	Fadista_et_al_2014_Table_S8
BLOC1S1	T2D_cis_eQTL	Fadista_et_al_2014_Table_S8
ATP1B2	T2D_cis_eQTL	Fadista_et_al_2014_Table_S8
FLJ13197	T2D_cis_eQTL	Fadista_et_al_2014_Table_S8
VPS13A	T2D_cis_eQTL	Fadista_et_al_2014_Table_S8
N6AMT1	T2D_cis_eQTL	Fadista_et_al_2014_Table_S8
LOC392232	T2D_cis_eQTL	Fadista_et_al_2014_Table_S8
NDUFA10	T2D_cis_eQTL	Fadista_et_al_2014_Table_S8
CCDC65	T2D_cis_eQTL	Fadista_et_al_2014_Table_S8
SLC5A11	T2D_cis_eQTL	Fadista_et_al_2014_Table_S8
C17orf46	T2D_cis_eQTL	Fadista_et_al_2014_Table_S8
TRPV4	T2D_cis_eQTL	Fadista_et_al_2014_Table_S8
HNMT	T2D_cis_eQTL	Fadista_et_al_2014_Table_S8
PL-5283	T2D_cis_eQTL	Fadista_et_al_2014_Table_S8
USP6NL	T2D_cis_eQTL	Fadista_et_al_2014_Table_S8
RNF141	T2D_cis_eQTL	Fadista_et_al_2014_Table_S8
SLC11A1	T2D_cis_eQTL	Fadista_et_al_2014_Table_S8
PSMD13	T2D_cis_eQTL	Fadista_et_al_2014_Table_S8
SUGT1P3	T2D_cis_eQTL	Fadista_et_al_2014_Table_S8
ROR2	T2D_cis_eQTL	Fadista_et_al_2014_Table_S8
FUT10	T2D_cis_eQTL	Fadista_et_al_2014_Table_S8
NAT8	T2D_cis_eQTL	Fadista_et_al_2014_Table_S8
MLC1	T2D_cis_eQTL	Fadista_et_al_2014_Table_S8
LOC285074	T2D_cis_eQTL	Fadista_et_al_2014_Table_S8
KLB	T2D_cis_eQTL	Fadista_et_al_2014_Table_S8
OR2B11	T2D_cis_eQTL	Fadista_et_al_2014_Table_S8
KIAA1530	T2D_cis_eQTL	Fadista_et_al_2014_Table_S8
RNF144A	T2D_cis_eQTL	Fadista_et_al_2014_Table_S8
GRHPR	T2D_cis_eQTL	Fadista_et_al_2014_Table_S8
RPS23	T2D_cis_eQTL	Fadista_et_al_2014_Table_S8
RPL23AP82	T2D_cis_eQTL	Fadista_et_al_2014_Table_S8
GAS2	T2D_cis_eQTL	Fadista_et_al_2014_Table_S8
SLC9A10	T2D_cis_eQTL	Fadista_et_al_2014_Table_S8
POLR2J2	T2D_cis_eQTL	Fadista_et_al_2014_Table_S8
UPK3BL	T2D_cis_eQTL	Fadista_et_al_2014_Table_S8
IFT46	T2D_cis_eQTL	Fadista_et_al_2014_Table_S8
PAK7	T2D_cis_eQTL	Fadista_et_al_2014_Table_S8
PTH2R	T2D_cis_eQTL	Fadista_et_al_2014_Table_S8
LOC284551	T2D_cis_eQTL	Fadista_et_al_2014_Table_S8
RAET1K	T2D_cis_eQTL	Fadista_et_al_2014_Table_S8
GP5	T2D_cis_eQTL	Fadista_et_al_2014_Table_S8
USP40	T2D_cis_eQTL	Fadista_et_al_2014_Table_S8
SLC25A26	T2D_cis_eQTL	Fadista_et_al_2014_Table_S8
CIAPIN1	T2D_cis_eQTL	Fadista_et_al_2014_Table_S8
ADH4	T2D_cis_eQTL	Fadista_et_al_2014_Table_S8
ZNF781	T2D_cis_eQTL	Fadista_et_al_2014_Table_S8
TMEM18	T2D_cis_eQTL	Fadista_et_al_2014_Table_S8
FOXA1	T2D_cis_eQTL	Fadista_et_al_2014_Table_S8
DIP2B	T2D_cis_eQTL	Fadista_et_al_2014_Table_S8
LPPR5	T2D_cis_eQTL	Fadista_et_al_2014_Table_S8
KCNH7	T2D_cis_eQTL	Fadista_et_al_2014_Table_S8
CHRNA2	T2D_cis_eQTL	Fadista_et_al_2014_Table_S8
GLI3	T2D_cis_eQTL	Fadista_et_al_2014_Table_S8
LOC100134317	T2D_cis_eQTL	Fadista_et_al_2014_Table_S8
PRUNE2	T2D_cis_eQTL	Fadista_et_al_2014_Table_S8
PTGER4	T2D_cis_eQTL	Fadista_et_al_2014_Table_S8
KDELC2	T2D_cis_eQTL	Fadista_et_al_2014_Table_S8
RAB36	T2D_cis_eQTL	Fadista_et_al_2014_Table_S8
LYRM4	T2D_cis_eQTL	Fadista_et_al_2014_Table_S8
ELP3	T2D_cis_eQTL	Fadista_et_al_2014_Table_S8
LOC728853	T2D_cis_eQTL	Fadista_et_al_2014_Table_S8
MCART1	T2D_cis_eQTL	Fadista_et_al_2014_Table_S8
HOXC8	T2D_cis_eQTL	Fadista_et_al_2014_Table_S8
EPHX2	T2D_cis_eQTL	Fadista_et_al_2014_Table_S8
C11orf21	T2D_cis_eQTL	Fadista_et_al_2014_Table_S8
NEUROD4	T2D_cis_eQTL	Fadista_et_al_2014_Table_S8
PLIN3	T2D_cis_eQTL	Fadista_et_al_2014_Table_S8
C1orf125	T2D_cis_eQTL	Fadista_et_al_2014_Table_S8
RASSF8	T2D_cis_eQTL	Fadista_et_al_2014_Table_S8
NOMO3	T2D_cis_eQTL	Fadista_et_al_2014_Table_S8
GBAP1	T2D_cis_eQTL	Fadista_et_al_2014_Table_S8
SNAI3	T2D_cis_eQTL	Fadista_et_al_2014_Table_S8
LOC729375	T2D_cis_eQTL	Fadista_et_al_2014_Table_S8
PPFIBP1	T2D_cis_eQTL	Fadista_et_al_2014_Table_S8
EDN3	T2D_cis_eQTL	Fadista_et_al_2014_Table_S8
LOC100131320	T2D_cis_eQTL	Fadista_et_al_2014_Table_S8
ATP8B4	T2D_cis_eQTL	Fadista_et_al_2014_Table_S8
ARAP1	T2D_cis_eQTL	Fadista_et_al_2014_Table_S8
ABCB9	T2D_cis_eQTL	Fadista_et_al_2014_Table_S8
IDI2	T2D_cis_eQTL	Fadista_et_al_2014_Table_S8
CCNK	T2D_cis_eQTL	Fadista_et_al_2014_Table_S8
SRSF12	T2D_cis_eQTL	Fadista_et_al_2014_Table_S8
TSPAN33	T2D_cis_eQTL	Fadista_et_al_2014_Table_S8
PTTG2	T2D_cis_eQTL	Fadista_et_al_2014_Table_S8
ALPL	T2D_cis_eQTL	Fadista_et_al_2014_Table_S8
ATG10	T2D_cis_eQTL	Fadista_et_al_2014_Table_S8
C2CD2L	T2D_cis_eQTL	Fadista_et_al_2014_Table_S8
ABCC6	T2D_cis_eQTL	Fadista_et_al_2014_Table_S8
FLG	T2D_cis_eQTL	Fadista_et_al_2014_Table_S8
ADAM21	T2D_cis_eQTL	Fadista_et_al_2014_Table_S8
LOC283089	T2D_cis_eQTL	Fadista_et_al_2014_Table_S8
NSFL1C	T2D_cis_eQTL	Fadista_et_al_2014_Table_S8
PCGF5	T2D_cis_eQTL	Fadista_et_al_2014_Table_S8
GLIPR1	T2D_cis_eQTL	Fadista_et_al_2014_Table_S8
PEX6	T2D_cis_eQTL	Fadista_et_al_2014_Table_S8
GAD1	T2D_cis_eQTL	Fadista_et_al_2014_Table_S8
C15orf40	T2D_cis_eQTL	Fadista_et_al_2014_Table_S8
ZNF732	T2D_cis_eQTL	Fadista_et_al_2014_Table_S8
ALOX12	T2D_cis_eQTL	Fadista_et_al_2014_Table_S8
SSPN	T2D_cis_eQTL	Fadista_et_al_2014_Table_S8
ZNF736	T2D_cis_eQTL	Fadista_et_al_2014_Table_S8
CHRNB4	T2D_cis_eQTL	Fadista_et_al_2014_Table_S8
RIN2	T2D_cis_eQTL	Fadista_et_al_2014_Table_S8
PSMC5	T2D_cis_eQTL	Fadista_et_al_2014_Table_S8
ABCG2	T2D_cis_eQTL	Fadista_et_al_2014_Table_S8
BRPF3	T2D_cis_eQTL	Fadista_et_al_2014_Table_S8
TSHB	T2D_cis_eQTL	Fadista_et_al_2014_Table_S8
AGPS	T2D_cis_eQTL	Fadista_et_al_2014_Table_S8
ZNF208	T2D_cis_eQTL	Fadista_et_al_2014_Table_S8
BDH1	T2D_cis_eQTL	Fadista_et_al_2014_Table_S8
HAUS1	T2D_cis_eQTL	Fadista_et_al_2014_Table_S8
HOXA7	T2D_cis_eQTL	Fadista_et_al_2014_Table_S8
YARS2	T2D_cis_eQTL	Fadista_et_al_2014_Table_S8
SASH1	T2D_cis_eQTL	Fadista_et_al_2014_Table_S8
BTRC	T2D_cis_eQTL	Fadista_et_al_2014_Table_S8
MSH3	T2D_cis_eQTL	Fadista_et_al_2014_Table_S8
DIS3L2	T2D_cis_eQTL	Fadista_et_al_2014_Table_S8
ZNF468	T2D_cis_eQTL	Fadista_et_al_2014_Table_S8
LOC387647	T2D_cis_eQTL	Fadista_et_al_2014_Table_S8
TIPIN	T2D_cis_eQTL	Fadista_et_al_2014_Table_S8
ANK1	T2D_islet_eQTL	van_de_Bunt_et_al_2015_Table_1
AP3S2	T2D_islet_eQTL	van_de_Bunt_et_al_2015_Table_1
ARAP1	T2D_islet_eQTL	van_de_Bunt_et_al_2015_Table_1
TMEM195	T2D_islet_eQTL	van_de_Bunt_et_al_2015_Table_1
CDC123	T2D_islet_eQTL	van_de_Bunt_et_al_2015_Table_1
MADD	T2D_islet_eQTL	van_de_Bunt_et_al_2015_Table_1
WARS	T2D_islet_eQTL	van_de_Bunt_et_al_2015_Table_1
ADCY5	T2D_islet_eQTL	van_de_Bunt_et_al_2015_Table_1
AMT	T2D_islet_eQTL	van_de_Bunt_et_al_2015_Table_1
FADS1	T2D_islet_eQTL	van_de_Bunt_et_al_2015_Table_1
MTNR1B	T2D_islet_eQTL	van_de_Bunt_et_al_2015_Table_1
PCSK1	T2D_islet_eQTL	van_de_Bunt_et_al_2015_Table_1
TMEM163	T2D_islet_eQTL	van_de_Bunt_et_al_2015_Table_1
ZMIZ1	T2D_islet_eQTL	van_de_Bunt_et_al_2015_Table_1
NKX6-3	T2D_islet_eQTL	van_de_Bunt_et_al_2015_Table_1
ANPEP	T2D_islet_eQTL	van_de_Bunt_et_al_2015_Table_1
STARD10	T2D_islet_eQTL	van_de_Bunt_et_al_2015_Table_1
CAMK1D	T2D_islet_eQTL	van_de_Bunt_et_al_2015_Table_1
DGKB	T2D_islet_eQTL	van_de_Bunt_et_al_2015_Table_1
ACP2	T2D_islet_eQTL	van_de_Bunt_et_al_2015_Table_1
RBM6	T2D_islet_eQTL	van_de_Bunt_et_al_2015_Table_1
CTD-2260A17.2	T2D_islet_eQTL	van_de_Bunt_et_al_2015_Table_1
MGAT5	T2D_islet_eQTL	van_de_Bunt_et_al_2015_Table_1
SLC5A11	Islet_eQTL	vandeBunt_et_al_2015_TableS3
PSG4	Islet_eQTL	vandeBunt_et_al_2015_TableS3
GBP3	Islet_eQTL	vandeBunt_et_al_2015_TableS3
L1TD1	Islet_eQTL	vandeBunt_et_al_2015_TableS3
DDX11	Islet_eQTL	vandeBunt_et_al_2015_TableS3
SGCA	Islet_eQTL	vandeBunt_et_al_2015_TableS3
ENOSF1	Islet_eQTL	vandeBunt_et_al_2015_TableS3
ERAP2	Islet_eQTL	vandeBunt_et_al_2015_TableS3
KLHDC7A	Islet_eQTL	vandeBunt_et_al_2015_TableS3
CDSN	Islet_eQTL	vandeBunt_et_al_2015_TableS3
PSORS1C1	Islet_eQTL	vandeBunt_et_al_2015_TableS3
ST7L	Islet_eQTL	vandeBunt_et_al_2015_TableS3
CCBL2	Islet_eQTL	vandeBunt_et_al_2015_TableS3
ACOT4	Islet_eQTL	vandeBunt_et_al_2015_TableS3
ZFP57	Islet_eQTL	vandeBunt_et_al_2015_TableS3
GPX7	Islet_eQTL	vandeBunt_et_al_2015_TableS3
LY75	Islet_eQTL	vandeBunt_et_al_2015_TableS3
PRPH2	Islet_eQTL	vandeBunt_et_al_2015_TableS3
ATP2C2	Islet_eQTL	vandeBunt_et_al_2015_TableS3
NDUFV3	Islet_eQTL	vandeBunt_et_al_2015_TableS3
LRRC69	Islet_eQTL	vandeBunt_et_al_2015_TableS3
GLIPR1L2	Islet_eQTL	vandeBunt_et_al_2015_TableS3
XRCC6BP1	Islet_eQTL	vandeBunt_et_al_2015_TableS3
APBB1IP	Islet_eQTL	vandeBunt_et_al_2015_TableS3
PYROXD1	Islet_eQTL	vandeBunt_et_al_2015_TableS3
GRHPR	Islet_eQTL	vandeBunt_et_al_2015_TableS3
AP3S2	Islet_eQTL	vandeBunt_et_al_2015_TableS3
ABO	Islet_eQTL	vandeBunt_et_al_2015_TableS3
GSTM3	Islet_eQTL	vandeBunt_et_al_2015_TableS3
SH3YL1	Islet_eQTL	vandeBunt_et_al_2015_TableS3
FAM182B	Islet_eQTL	vandeBunt_et_al_2015_TableS3
WARS2	Islet_eQTL	vandeBunt_et_al_2015_TableS3
ATP12A	Islet_eQTL	vandeBunt_et_al_2015_TableS3
C15orf57	Islet_eQTL	vandeBunt_et_al_2015_TableS3
LDHC	Islet_eQTL	vandeBunt_et_al_2015_TableS3
APOBEC3G	Islet_eQTL	vandeBunt_et_al_2015_TableS3
THNSL2	Islet_eQTL	vandeBunt_et_al_2015_TableS3
TCL6	Islet_eQTL	vandeBunt_et_al_2015_TableS3
FOXRED1	Islet_eQTL	vandeBunt_et_al_2015_TableS3
TRMT61B	Islet_eQTL	vandeBunt_et_al_2015_TableS3
MRPL21	Islet_eQTL	vandeBunt_et_al_2015_TableS3
PON1	Islet_eQTL	vandeBunt_et_al_2015_TableS3
XRRA1	Islet_eQTL	vandeBunt_et_al_2015_TableS3
CAT	Islet_eQTL	vandeBunt_et_al_2015_TableS3
NDUFA3	Islet_eQTL	vandeBunt_et_al_2015_TableS3
RHD	Islet_eQTL	vandeBunt_et_al_2015_TableS3
KCND3	Islet_eQTL	vandeBunt_et_al_2015_TableS3
ELFN2	Islet_eQTL	vandeBunt_et_al_2015_TableS3
ATP6AP1L	Islet_eQTL	vandeBunt_et_al_2015_TableS3
FAM118A	Islet_eQTL	vandeBunt_et_al_2015_TableS3
GPR149	Islet_eQTL	vandeBunt_et_al_2015_TableS3
C17orf97	Islet_eQTL	vandeBunt_et_al_2015_TableS3
NUDT2	Islet_eQTL	vandeBunt_et_al_2015_TableS3
THSD7B	Islet_eQTL	vandeBunt_et_al_2015_TableS3
FRA10AC1	Islet_eQTL	vandeBunt_et_al_2015_TableS3
C1QL3	Islet_eQTL	vandeBunt_et_al_2015_TableS3
SNX19	Islet_eQTL	vandeBunt_et_al_2015_TableS3
IQCB1	Islet_eQTL	vandeBunt_et_al_2015_TableS3
TRAPPC4	Islet_eQTL	vandeBunt_et_al_2015_TableS3
HLA-DRB1	Islet_eQTL	vandeBunt_et_al_2015_TableS3
HLA-DRB5	Islet_eQTL	vandeBunt_et_al_2015_TableS3
HLA-DQB1	Islet_eQTL	vandeBunt_et_al_2015_TableS3
TPMT	Islet_eQTL	vandeBunt_et_al_2015_TableS3
PEX5L	Islet_eQTL	vandeBunt_et_al_2015_TableS3
NOMO3	Islet_eQTL	vandeBunt_et_al_2015_TableS3
ELP3	Islet_eQTL	vandeBunt_et_al_2015_TableS3
EPHX2	Islet_eQTL	vandeBunt_et_al_2015_TableS3
AKAP2	Islet_eQTL	vandeBunt_et_al_2015_TableS3
ATG10	Islet_eQTL	vandeBunt_et_al_2015_TableS3
HLA-B	Islet_eQTL	vandeBunt_et_al_2015_TableS3
TSPAN12	Islet_eQTL	vandeBunt_et_al_2015_TableS3
PM20D1	Islet_eQTL	vandeBunt_et_al_2015_TableS3
ZNF83	Islet_eQTL	vandeBunt_et_al_2015_TableS3
CHURC1	Islet_eQTL	vandeBunt_et_al_2015_TableS3
CPNE1	Islet_eQTL	vandeBunt_et_al_2015_TableS3
EFHB	Islet_eQTL	vandeBunt_et_al_2015_TableS3
EFCAB2	Islet_eQTL	vandeBunt_et_al_2015_TableS3
NARS2	Islet_eQTL	vandeBunt_et_al_2015_TableS3
HLA-A	Islet_eQTL	vandeBunt_et_al_2015_TableS3
CHPT1	Islet_eQTL	vandeBunt_et_al_2015_TableS3
FMN1	Islet_eQTL	vandeBunt_et_al_2015_TableS3
AGAP7	Islet_eQTL	vandeBunt_et_al_2015_TableS3
TDRD5	Islet_eQTL	vandeBunt_et_al_2015_TableS3
ZNF208	Islet_eQTL	vandeBunt_et_al_2015_TableS3
C15orf40	Islet_eQTL	vandeBunt_et_al_2015_TableS3
EFCAB1	Islet_eQTL	vandeBunt_et_al_2015_TableS3
C8orf59	Islet_eQTL	vandeBunt_et_al_2015_TableS3
HCG9	Islet_eQTL	vandeBunt_et_al_2015_TableS3
ARAP1	Islet_eQTL	vandeBunt_et_al_2015_TableS3
SURF1	Islet_eQTL	vandeBunt_et_al_2015_TableS3
NAAA	Islet_eQTL	vandeBunt_et_al_2015_TableS3
ACSM1	Islet_eQTL	vandeBunt_et_al_2015_TableS3
ZNF732	Islet_eQTL	vandeBunt_et_al_2015_TableS3
MLC1	Islet_eQTL	vandeBunt_et_al_2015_TableS3
C4orf33	Islet_eQTL	vandeBunt_et_al_2015_TableS3
ZNF584	Islet_eQTL	vandeBunt_et_al_2015_TableS3
AGXT	Islet_eQTL	vandeBunt_et_al_2015_TableS3
TMEM45A	Islet_eQTL	vandeBunt_et_al_2015_TableS3
POMZP3	Islet_eQTL	vandeBunt_et_al_2015_TableS3
DCTN5	Islet_eQTL	vandeBunt_et_al_2015_TableS3
PEX6	Islet_eQTL	vandeBunt_et_al_2015_TableS3
OR7D2	Islet_eQTL	vandeBunt_et_al_2015_TableS3
STYXL1	Islet_eQTL	vandeBunt_et_al_2015_TableS3
TLL2	Islet_eQTL	vandeBunt_et_al_2015_TableS3
C2orf54	Islet_eQTL	vandeBunt_et_al_2015_TableS3
SIGLEC12	Islet_eQTL	vandeBunt_et_al_2015_TableS3
UROS	Islet_eQTL	vandeBunt_et_al_2015_TableS3
ABCB9	Islet_eQTL	vandeBunt_et_al_2015_TableS3
CYP2C9	Islet_eQTL	vandeBunt_et_al_2015_TableS3
ULK4	Islet_eQTL	vandeBunt_et_al_2015_TableS3
PRUNE2	Islet_eQTL	vandeBunt_et_al_2015_TableS3
FTSJ3	Islet_eQTL	vandeBunt_et_al_2015_TableS3
NOTCH2NL	Islet_eQTL	vandeBunt_et_al_2015_TableS3
TSPAN33	Islet_eQTL	vandeBunt_et_al_2015_TableS3
ZP3	Islet_eQTL	vandeBunt_et_al_2015_TableS3
PSORS1C2	Islet_eQTL	vandeBunt_et_al_2015_TableS3
QSOX2	Islet_eQTL	vandeBunt_et_al_2015_TableS3
FAM106A	Islet_eQTL	vandeBunt_et_al_2015_TableS3
ERAP1	Islet_eQTL	vandeBunt_et_al_2015_TableS3
SLC25A26	Islet_eQTL	vandeBunt_et_al_2015_TableS3
IP6K3	Islet_eQTL	vandeBunt_et_al_2015_TableS3
DHRS4L2	Islet_eQTL	vandeBunt_et_al_2015_TableS3
HLA-DQA2	Islet_eQTL	vandeBunt_et_al_2015_TableS3
CLIC6	Islet_eQTL	vandeBunt_et_al_2015_TableS3
CNGA1	Islet_eQTL	vandeBunt_et_al_2015_TableS3
GABRA5	Islet_eQTL	vandeBunt_et_al_2015_TableS3
SNX16	Islet_eQTL	vandeBunt_et_al_2015_TableS3
DIP2B	Islet_eQTL	vandeBunt_et_al_2015_TableS3
ZNF468	Islet_eQTL	vandeBunt_et_al_2015_TableS3
DDTL	Islet_eQTL	vandeBunt_et_al_2015_TableS3
OR3A2	Islet_eQTL	vandeBunt_et_al_2015_TableS3
CCDC67	Islet_eQTL	vandeBunt_et_al_2015_TableS3
UCA1	Islet_eQTL	vandeBunt_et_al_2015_TableS3
USP40	Islet_eQTL	vandeBunt_et_al_2015_TableS3
PLEKHM1	Islet_eQTL	vandeBunt_et_al_2015_TableS3
TTC12	Islet_eQTL	vandeBunt_et_al_2015_TableS3
RNF212	Islet_eQTL	vandeBunt_et_al_2015_TableS3
GSTM1	Islet_eQTL	vandeBunt_et_al_2015_TableS3
ST6GAL1	Islet_eQTL	vandeBunt_et_al_2015_TableS3
TIPIN	Islet_eQTL	vandeBunt_et_al_2015_TableS3
SLC44A5	Islet_eQTL	vandeBunt_et_al_2015_TableS3
NBPF3	Islet_eQTL	vandeBunt_et_al_2015_TableS3
KRT40	Islet_eQTL	vandeBunt_et_al_2015_TableS3
PSORS1C3	Islet_eQTL	vandeBunt_et_al_2015_TableS3
PSMD13	Islet_eQTL	vandeBunt_et_al_2015_TableS3
ZNF98	Islet_eQTL	vandeBunt_et_al_2015_TableS3
MTNR1B	Islet_eQTL	vandeBunt_et_al_2015_TableS3
ARHGAP40	Islet_eQTL	vandeBunt_et_al_2015_TableS3
CCL4L2	Islet_eQTL	vandeBunt_et_al_2015_TableS3
MICA	Islet_eQTL	vandeBunt_et_al_2015_TableS3
FUT9	Islet_eQTL	vandeBunt_et_al_2015_TableS3
DMBT1	Islet_eQTL	vandeBunt_et_al_2015_TableS3
C10orf107	Islet_eQTL	vandeBunt_et_al_2015_TableS3
STOX1	Islet_eQTL	vandeBunt_et_al_2015_TableS3
TSGA10	Islet_eQTL	vandeBunt_et_al_2015_TableS3
FUT10	Islet_eQTL	vandeBunt_et_al_2015_TableS3
FLG	Islet_eQTL	vandeBunt_et_al_2015_TableS3
ZNF786	Islet_eQTL	vandeBunt_et_al_2015_TableS3
TMEM51-AS1	T2D_lincRNA_eQTL	Fadista_et_al_2014_Table_S14
LINC00339	T2D_lincRNA_eQTL	Fadista_et_al_2014_Table_S14
LOC284551	T2D_lincRNA_eQTL	Fadista_et_al_2014_Table_S14
SLC2A1-AS1	T2D_lincRNA_eQTL	Fadista_et_al_2014_Table_S14
FLVCR1-AS1	T2D_lincRNA_eQTL	Fadista_et_al_2014_Table_S14
LINC01115	T2D_lincRNA_eQTL	Fadista_et_al_2014_Table_S14
LOC100133985	T2D_lincRNA_eQTL	Fadista_et_al_2014_Table_S14
PAX8-AS1	T2D_lincRNA_eQTL	Fadista_et_al_2014_Table_S14
TEX41	T2D_lincRNA_eQTL	Fadista_et_al_2014_Table_S14
PKI55	T2D_lincRNA_eQTL	Fadista_et_al_2014_Table_S14
LINC00635	T2D_lincRNA_eQTL	Fadista_et_al_2014_Table_S14
SNHG8	T2D_lincRNA_eQTL	Fadista_et_al_2014_Table_S14
LINC01060	T2D_lincRNA_eQTL	Fadista_et_al_2014_Table_S14
LOC257396	T2D_lincRNA_eQTL	Fadista_et_al_2014_Table_S14
MGC39372	T2D_lincRNA_eQTL	Fadista_et_al_2014_Table_S14
LY86-AS1	T2D_lincRNA_eQTL	Fadista_et_al_2014_Table_S14
HCG4	T2D_lincRNA_eQTL	Fadista_et_al_2014_Table_S14
HCG9	T2D_lincRNA_eQTL	Fadista_et_al_2014_Table_S14
ZNRD1-AS1	T2D_lincRNA_eQTL	Fadista_et_al_2014_Table_S14
PSORS1C3	T2D_lincRNA_eQTL	Fadista_et_al_2014_Table_S14
TDRG1	T2D_lincRNA_eQTL	Fadista_et_al_2014_Table_S14
LINC00472	T2D_lincRNA_eQTL	Fadista_et_al_2014_Table_S14
SNHG5	T2D_lincRNA_eQTL	Fadista_et_al_2014_Table_S14
LINC00035	T2D_lincRNA_eQTL	Fadista_et_al_2014_Table_S14
DLX6-AS1	T2D_lincRNA_eQTL	Fadista_et_al_2014_Table_S14
WEE2-AS1	T2D_lincRNA_eQTL	Fadista_et_al_2014_Table_S14
HAS2-AS1	T2D_lincRNA_eQTL	Fadista_et_al_2014_Table_S14
FLJ35024	T2D_lincRNA_eQTL	Fadista_et_al_2014_Table_S14
LINC00476	T2D_lincRNA_eQTL	Fadista_et_al_2014_Table_S14
PSMD5-AS1	T2D_lincRNA_eQTL	Fadista_et_al_2014_Table_S14
MIR600HG	T2D_lincRNA_eQTL	Fadista_et_al_2014_Table_S14
ZMIZ1-AS1	T2D_lincRNA_eQTL	Fadista_et_al_2014_Table_S14
LINC00959	T2D_lincRNA_eQTL	Fadista_et_al_2014_Table_S14
KRTAP5-AS1	T2D_lincRNA_eQTL	Fadista_et_al_2014_Table_S14
LOC283177	T2D_lincRNA_eQTL	Fadista_et_al_2014_Table_S14
LINC00942	T2D_lincRNA_eQTL	Fadista_et_al_2014_Table_S14
CD27-AS1	T2D_lincRNA_eQTL	Fadista_et_al_2014_Table_S14
FZD10-AS1	T2D_lincRNA_eQTL	Fadista_et_al_2014_Table_S14
LOC116437	T2D_lincRNA_eQTL	Fadista_et_al_2014_Table_S14
TCL6	T2D_lincRNA_eQTL	Fadista_et_al_2014_Table_S14
LINC00239	T2D_lincRNA_eQTL	Fadista_et_al_2014_Table_S14
CRNDE	T2D_lincRNA_eQTL	Fadista_et_al_2014_Table_S14
NBR2	T2D_lincRNA_eQTL	Fadista_et_al_2014_Table_S14
CRHR1-IT1	T2D_lincRNA_eQTL	Fadista_et_al_2014_Table_S14
DLGAP1-AS1	T2D_lincRNA_eQTL	Fadista_et_al_2014_Table_S14
LINC00667	T2D_lincRNA_eQTL	Fadista_et_al_2014_Table_S14
UCA1	T2D_lincRNA_eQTL	Fadista_et_al_2014_Table_S14
LOC100134317	T2D_lincRNA_eQTL	Fadista_et_al_2014_Table_S14
ZNF667-AS1	T2D_lincRNA_eQTL	Fadista_et_al_2014_Table_S14
LINC00654	T2D_lincRNA_eQTL	Fadista_et_al_2014_Table_S14
LINC00479	T2D_lincRNA_eQTL	Fadista_et_al_2014_Table_S14
LINC00313	T2D_lincRNA_eQTL	Fadista_et_al_2014_Table_S14
RFPL1S	T2D_lincRNA_eQTL	Fadista_et_al_2014_Table_S14
LINC00207	T2D_lincRNA_eQTL	Fadista_et_al_2014_Table_S14
