# Supplementary material for: Single-cell transcriptomes identify human islet cell signatures and reveal cell-type–specific expression changes in type 2 diabetes
Source: Genome Res. 2017 Feb;27(2):208–22. doi: 10.1101/gr.212720.116 (PMC5287227; doi:10.1101/gr.212720.116)
Supplement: Supplemental Material [file supp_gr.212720.116_Supplemental_Table_S12.xlsx]

## Sheet: Fasting.Glucose.GWAS.ANOVA
Supplemental_Table_S12: Investigating the enrichment of target genes located upstream/downstream of diabetes related GWAS single nucleotide polymorphisms (SNPs) in islet cell types.
Tables of fasting glucose, fasting insulin, proinsulin, Type 1 diabetes, and Type 2 diabetes related genes and their patterns of enrichment in islet cells after ANOVA and THSD post-hoc analysis. For each table, the first sheet contains the number and respective names of genes enriched in each islet cell type (>4 fold change in expression in a specific cell type in comparison to all other islet ce…
Expression in Endocrine Cells	Number of Genes (out of 812 genes, from 39 SNP indices)	Gene Symbol
Beta	13	LRPPRC, FASTKD1, SMC3, SSR1, PSMC1, CCDC53, GPN1, RNF34, GOLGA7, MTUS2, FAM162A, SLC2A2, PDX1
Alpha	8	KLHL41, SPC25, PARP9, BSCL2, FADS1, ELL2, RP11-254I22.3, ARRDC4
Delta	13	UBR3, GPAM, MED30, MDK, RIOK1, CCDC14, PARP14, LEPR, ERCC1, SKIL, PROX1, GPAT4, LNPEP
Gamma	7	LIPH, NDUFS3, NDNF, AK4, GLRX, LNX2, ID4
Beta.Alpha	2	LMO1, IGF1R
Beta.Delta	2	PSMC3, DDB2
Beta.Gamma	2	POLR1D, GLIS3
Gamma.Delta	2	FOSB, KANK1
Beta.Alpha.Delta	2	SLC30A8, RAB6A
Beta.Alpha.Gamma	2	G6PC2, SCGB2A1
Beta.Gamma.Delta	2	PCSK1, SOX4
Pan-Islet	78	MED17, MAP3K13, CELF1, METTL5, SSB, PPIG, ARHGAP1, BBIP1, RAD21, PDCD4, UTP23, EIF3H, RREB1, HACD2, CALM1, EFCAB11, PARP15, ANAPC15, LAMTOR1, LRTOMT, H2AFV, PPIA, NUMA1, RNF10, ANXA5, TMED4, NAPB, TMEM179B, LEPROT, ZCCHC8, JAK1, AKIP1, CLIP1, ATRAID, RPL27A, SNRPD2, GIPR, RIC3, EEF1G, OPA3, FTH1, MLXIP, MRPL33, PSMD9, EIF4A2, TMEM258, CAST, TMEM120B, PHC3, OST4, VPS13C, TMEM138, CYB561A3, DDB1, T…
Lowly Expressed (Average Log2CPM < 2 across all islet cells)	490	VSTM5, SMCO4, CCDC67, MTNR1B, OR4S1, OR4X1, OR4B1, NUP160, AGBL2, C1QTNF4, FAM180B, C3orf70, KBTBD4, RAPSN, SLC39A13, SPI1, MYBPC3, KLHL23, PHOSPHO2, CCDC173, RP11-724O16.1, BBS5, NR1H3, ACP2, AC006041.1, AC005550.5, MEOX2-AS1, AC006458.3, PACSIN3, LRP2, LRP4, DHRS9, F2, ABCB11, ZNF408, GRB10, ADRA2A, EXT1, AMBRA1, CHRM4, DDC, STK39, FIGNL1, IKZF1, C7orf72, CREB3L1, ZPBP, VWC2, KALRN, DUSP5, ROPN…
< 4-fold change	189	C11orf54, TAF1D, CEP295, SLC36A4, FAT3, SENP2, PTPRJ, TMEM41A, FNBP4, MTCH2, EHHADH, PTPMT1, VPS8, MADD, ARFGAP2, COBL, C11orf49, CKAP5, ATG13, NOSTRIN, HARBI1, SHOC2, CERS6, AARD, DGKZ, RBM20, GADL1, SMNDC1, MXI1, TBRG4, MYLK, TTC7B, PLEKHB1, SEC22A, NRDE2, ATG16L2, STARD10, DGKB, RP11-944C7.1, DTX3L, FOXN3, KPNA1, WDR5B, TTC8, CCM2, SPPL3, PURB, MLEC, EML5, POP5, EXOSC9, OGDH, CSTL1, ZC3H14, CO…

## Sheet: Fasting.Glucose.GWAS.SNPs.Used
	DATE ADDED TO CATALOG	PUBMEDID	FIRST AUTHOR	DATE	JOURNAL	LINK	STUDY	DISEASE/TRAIT	INITIAL SAMPLE SIZE	REPLICATION SAMPLE SIZE	REGION	CHR_ID	CHR_POS	REPORTED GENE(S)	MAPPED_GENE	UPSTREAM_GENE_ID	DOWNSTREAM_GENE_ID	SNP_GENE_IDS	UPSTREAM_GENE_DISTANCE	DOWNSTREAM_GENE_DISTANCE	STRONGEST SNP-RISK ALLELE	SNPS	MERGED	SNP_ID_CURRENT	CONTEXT	INTERGENIC	RISK ALLELE FREQUENCY	P-VALUE	PVALUE_MLOG	P-VALUE (TEXT)	OR or BETA	95% CI (TEXT)	PLATFORM [SNPS PASSING QC]	CNV
124	2008-09-10	17903298	Meigs JB	2007-09-19	BMC Med Genet	www.ncbi.nlm.nih.gov/pubmed/17903298	Genome-wide association with diabetes-related traits in the Framingham Heart Study.	Fasting plasma glucose	1,027 individuals	NA	8p11.21	8	40626720	ZMAT4	ZMAT4	NA	NA	79698	NA	NA	rs2722425-?	rs2722425	NA	2722425	intron_variant	0	NR	2e-08	7.69897	(tFPG)			Affymetrix [70897]	N
125	2008-09-10	17903298	Meigs JB	2007-09-19	BMC Med Genet	www.ncbi.nlm.nih.gov/pubmed/17903298	Genome-wide association with diabetes-related traits in the Framingham Heart Study.	Fasting plasma glucose	1,027 individuals	NA	3p24.1	3	30305477	intergenic	LOC105377012 - LOC101927995	105377012	101927995		120629	44247	rs10510634-?	rs10510634	NA	10510634	upstream_gene_variant	0	NR	5e-06	5.30103	(tFPG)			Affymetrix [70897]	N
315	2008-07-01	18521185	Chen WM	2008-06-04	J Clin Invest	www.ncbi.nlm.nih.gov/pubmed/18521185	Variations in the G6PC2/ABCB11 genomic region are associated with fasting glucose levels.	Fasting plasma glucose	5,088 European ancestry individuals	18,436 European ancestry individuals	2q31.1	2	168917561	G6PC2, ABCB11	G6PC2 - ABCB11	57818	8647		7561	5241	rs563694-C	rs563694	NA	563694	upstream_gene_variant	0	0.34	4e-07	6.39794				Illumina [315635]	N
522	2008-09-10	17903298	Meigs JB	2007-09-19	BMC Med Genet	www.ncbi.nlm.nih.gov/pubmed/17903298	Genome-wide association with diabetes-related traits in the Framingham Heart Study.	Fasting plasma glucose	1,027 individuals	NA	4q27	4	120880635	PRDM5	PRDM5	NA	NA	11107	NA	NA	rs180730-?	rs180730	NA	180730	intron_variant	0	NR	5e-06	5.30103	(FPG)			Affymetrix [70897]	N
525	2008-09-10	17903298	Meigs JB	2007-09-19	BMC Med Genet	www.ncbi.nlm.nih.gov/pubmed/17903298	Genome-wide association with diabetes-related traits in the Framingham Heart Study.	Fasting plasma glucose	1,027 individuals	NA	5q23.3	5	130607626	intergenic	RNU7-53P - RPL11P2	100151649	133629		220947	382253	rs7731657-?	rs7731657	NA	7731657	intergenic_variant	0	NR	7e-06	5.1549	(tFPG)			Affymetrix [70897]	N
897	2009-01-07	19060909	Bouatia-Naji N	2008-12-07	Nat Genet	www.ncbi.nlm.nih.gov/pubmed/19060909	A variant near MTNR1B is associated with increased fasting plasma glucose levels and type 2 diabetes risk.	Fasting plasma glucose	2,151 European ancestry individuals	16,094 European ancestry individuals	11q14.3	11	92940662	MTNR1B	LOC105369431 - MTNR1B	105369431	4544		25033	28961	rs1387153-T	rs1387153	NA	1387153	downstream_gene_variant	0	0.29	2e-36	35.699		0.07	[0.05-0.08] mmol/l increase	Illumina [308846]	N
1200	2009-02-26	19060907	Prokopenko I	2008-12-01	Nat Genet	www.ncbi.nlm.nih.gov/pubmed/19060907	Variants in MTNR1B influence fasting glucose levels.	Fasting plasma glucose	35,812 European ancestry individuals	NA	7p13	7	44196069	GCK	GCK - YKT6	2645	10652		6646	4899	rs4607517-A	rs4607517	NA	4607517	intron_variant	0	0.18	1e-25	25		0.06	[0.05-0.07] mmol/l increase	Affymetrix, Illumina, Perlegen [up to 2557249] (imputed)	N
3999	2013-10-18	20152958	Xing C	2010-02-11	Am J Hum Genet	www.ncbi.nlm.nih.gov/pubmed/20152958	A weighted false discovery rate control procedure reveals alleles at FOXA2 that influence fasting glucose levels.	Fasting plasma glucose	2,029 African American individuals, 7,428 European ancestry individuals	1,571 African American individuals, 3,825 European ancestry individuals	20p11.21	20	22587304	FOXA2	FOXA2 - LINC01384	3170	101929685		1841	218	rs1209523-?	rs1209523	NA	1209523	upstream_gene_variant	0	0.043	2e-11	10.699				Affymetrix [814004]	N
7431	2010-02-28	20081858	Dupuis J	2010-01-17	Nat Genet	www.ncbi.nlm.nih.gov/pubmed/20081858	New genetic loci implicated in fasting glucose homeostasis and their impact on type 2 diabetes risk.	Fasting glucose-related traits	up to 46,186 European ancestry individuals	up to 76,558 European ancestry individuals	7p21.2	7	15024684	TMEM195, DGKB	DGKB - AGMO	1607	392636		49907	134440	rs2191349-T	rs2191349	NA	2191349	intergenic_variant	0	0.52	3e-44	43.5229	(FPG)			Affymetrix, Illumina [~ 2500000] (imputed)	N
7432	2010-02-28	20081858	Dupuis J	2010-01-17	Nat Genet	www.ncbi.nlm.nih.gov/pubmed/20081858	New genetic loci implicated in fasting glucose homeostasis and their impact on type 2 diabetes risk.	Fasting glucose-related traits	up to 46,186 European ancestry individuals	up to 76,558 European ancestry individuals	2p23.3	2	27518370	GCKR	GCKR	NA	NA	2646	NA	NA	rs780094-C	rs780094	NA	780094	intron_variant	0	0.62	6e-38	37.2218	(FPG)			Affymetrix, Illumina [~ 2500000] (imputed)	N
7433	2010-02-28	20081858	Dupuis J	2010-01-17	Nat Genet	www.ncbi.nlm.nih.gov/pubmed/20081858	New genetic loci implicated in fasting glucose homeostasis and their impact on type 2 diabetes risk.	Fasting glucose-related traits	up to 46,186 European ancestry individuals	up to 76,558 European ancestry individuals	3q21.1	3	123346931	ADCY5	ADCY5	NA	NA	111	NA	NA	rs11708067-A	rs11708067	NA	11708067	intron_variant	0	0.78	7e-22	21.1549	(FPG)			Affymetrix, Illumina [~ 2500000] (imputed)	N
7434	2010-02-28	20081858	Dupuis J	2010-01-17	Nat Genet	www.ncbi.nlm.nih.gov/pubmed/20081858	New genetic loci implicated in fasting glucose homeostasis and their impact on type 2 diabetes risk.	Fasting glucose-related traits	up to 46,186 European ancestry individuals	up to 76,558 European ancestry individuals	11p11.2	11	47314769	MADD	MADD	NA	NA	8567	NA	NA	rs7944584-A	rs7944584	NA	7944584	intron_variant	0	0.75	2e-18	17.699	(FPG)			Affymetrix, Illumina [~ 2500000] (imputed)	N
7435	2010-02-28	20081858	Dupuis J	2010-01-17	Nat Genet	www.ncbi.nlm.nih.gov/pubmed/20081858	New genetic loci implicated in fasting glucose homeostasis and their impact on type 2 diabetes risk.	Fasting glucose-related traits	up to 46,186 European ancestry individuals	up to 76,558 European ancestry individuals	10q25.2	10	111282335	ADRA2A	ADRA2A - LOC105378484	150	105378484		201428	117946	rs10885122-G	rs10885122	NA	10885122	intergenic_variant	0	0.87	3e-16	15.5229	(FPG)			Affymetrix, Illumina [~ 2500000] (imputed)	N
7436	2010-02-28	20081858	Dupuis J	2010-01-17	Nat Genet	www.ncbi.nlm.nih.gov/pubmed/20081858	New genetic loci implicated in fasting glucose homeostasis and their impact on type 2 diabetes risk.	Fasting glucose-related traits	up to 46,186 European ancestry individuals	up to 76,558 European ancestry individuals	11q12.2	11	61804006	FADS1	FADS1	NA	NA	3992	NA	NA	rs174550-T	rs174550	NA	174550	5_prime_UTR_variant	0	0.64	2e-15	14.699	(FPG)			Affymetrix, Illumina [~ 2500000] (imputed)	N
7438	2010-02-28	20081858	Dupuis J	2010-01-17	Nat Genet	www.ncbi.nlm.nih.gov/pubmed/20081858	New genetic loci implicated in fasting glucose homeostasis and their impact on type 2 diabetes risk.	Fasting glucose-related traits	up to 46,186 European ancestry individuals	up to 76,558 European ancestry individuals	3q26.2	3	170999732	SLC2A2	SLC2A2	NA	NA	6514	NA	NA	rs11920090-T	rs11920090	NA	11920090	intron_variant	0	0.87	8e-13	12.0969	(FPG)			Affymetrix, Illumina [~ 2500000] (imputed)	N
7439	2010-02-28	20081858	Dupuis J	2010-01-17	Nat Genet	www.ncbi.nlm.nih.gov/pubmed/20081858	New genetic loci implicated in fasting glucose homeostasis and their impact on type 2 diabetes risk.	Fasting glucose-related traits	up to 46,186 European ancestry individuals	up to 76,558 European ancestry individuals	9p24.2	9	4289050	GLIS3	GLIS3	NA	NA	169792	NA	NA	rs7034200-A	rs7034200	NA	7034200	intron_variant	0	0.49	1e-12	12	(FPG)			Affymetrix, Illumina [~ 2500000] (imputed)	N
7440	2010-02-28	20081858	Dupuis J	2010-01-17	Nat Genet	www.ncbi.nlm.nih.gov/pubmed/20081858	New genetic loci implicated in fasting glucose homeostasis and their impact on type 2 diabetes risk.	Fasting glucose-related traits	up to 46,186 European ancestry individuals	up to 76,558 European ancestry individuals	1q32.3	1	213985913	PROX1	PROX1-AS1, PROX1	NA	NA	100505832, 5629	NA	NA	rs340874-C	rs340874	NA	340874	non_coding_transcript_exon_variant	0	0.52	7e-12	11.1549	(FPG)			Affymetrix, Illumina [~ 2500000] (imputed)	N
7441	2010-02-28	20081858	Dupuis J	2010-01-17	Nat Genet	www.ncbi.nlm.nih.gov/pubmed/20081858	New genetic loci implicated in fasting glucose homeostasis and their impact on type 2 diabetes risk.	Fasting glucose-related traits	up to 46,186 European ancestry individuals	up to 76,558 European ancestry individuals	15q22.2	15	62141763	C2CD4B	NPM1P47 - C2CD4B	100129972	388125		58364	21775	rs11071657-A	rs11071657	NA	11071657	intergenic_variant	0	0.63	4e-08	7.39794	(FPG)			Affymetrix, Illumina [~ 2500000] (imputed)	N
7460	2010-02-08	20081857	Saxena R	2010-01-17	Nat Genet	www.ncbi.nlm.nih.gov/pubmed/20081857	Genetic variation in GIPR influences the glucose and insulin responses to an oral glucose challenge.	Two-hour glucose challenge	15,234 individuals	up to 30,620 European ancestry individuals	19q13.32	19	45679046	GIPR	GIPR	NA	NA	2696	NA	NA	rs10423928-A	rs10423928	NA	10423928	intron_variant	0	NR	3e-12	11.5229		0.09	[0.07-0.11] mmol/L increase	Affymetrix, Illumina [NR]	N
7465	2010-02-28	20081858	Dupuis J	2010-01-17	Nat Genet	www.ncbi.nlm.nih.gov/pubmed/20081858	New genetic loci implicated in fasting glucose homeostasis and their impact on type 2 diabetes risk.	Fasting glucose-related traits	up to 46,186 European ancestry individuals	up to 76,558 European ancestry individuals	8q24.11	8	117173494	SLC30A8	SLC30A8, LOC105375716	NA	NA	169026, 105375716	NA	NA	rs11558471-A	rs11558471	NA	11558471	3_prime_UTR_variant	0	0.31	3e-11	10.5229	(FPG)			Affymetrix, Illumina [~ 2500000] (imputed)	N
7469	2010-02-28	20081858	Dupuis J	2010-01-17	Nat Genet	www.ncbi.nlm.nih.gov/pubmed/20081858	New genetic loci implicated in fasting glucose homeostasis and their impact on type 2 diabetes risk.	Fasting glucose-related traits	up to 46,186 European ancestry individuals	up to 76,558 European ancestry individuals	12q23.2	12	102481791	IGF1	IGF1 - LINC00485	3479	283432		5	327492	rs35767-G	rs35767	NA	35767	upstream_gene_variant	0	0.85	3e-08	7.52288	(FI)			Affymetrix, Illumina [~ 2500000] (imputed)	N
8213	2012-08-15	22581228	Manning AK	2012-05-13	Nat Genet	www.ncbi.nlm.nih.gov/pubmed/22581228	A genome-wide approach accounting for body mass index identifies genetic variants influencing fasting glycemic traits and insulin resistance.	Fasting glucose-related traits (interaction with BMI)	Up to 58,074 European ancestry individuals	Up tp 38,422 European ancestry individuals	11q13.4	11	72721940	ARAP1	ARAP1	NA	NA	116985	NA	NA	rs11603334-?	rs11603334	NA	11603334	5_prime_UTR_variant	0		2e-14	13.699				Affymetrix, Illumina [~ 2400000] (imputed)	N
8216	2012-08-15	22581228	Manning AK	2012-05-13	Nat Genet	www.ncbi.nlm.nih.gov/pubmed/22581228	A genome-wide approach accounting for body mass index identifies genetic variants influencing fasting glycemic traits and insulin resistance.	Fasting glucose-related traits (interaction with BMI)	Up to 58,074 European ancestry individuals	Up tp 38,422 European ancestry individuals	5q15	5	96207022	PCSK1	LOC101929710	NA	NA	101929710	NA	NA	rs13179048-?	rs13179048	NA	13179048	intron_variant	0		2e-10	9.69897				Affymetrix, Illumina [~ 2400000] (imputed)	N
8217	2012-08-15	22581228	Manning AK	2012-05-13	Nat Genet	www.ncbi.nlm.nih.gov/pubmed/22581228	A genome-wide approach accounting for body mass index identifies genetic variants influencing fasting glycemic traits and insulin resistance.	Fasting glucose-related traits (interaction with BMI)	Up to 58,074 European ancestry individuals	Up tp 38,422 European ancestry individuals	13q12.2	13	27917061	PDX1	PDX1-AS1	NA	NA	100861550	NA	NA	rs2293941-?	rs2293941	NA	2293941	intron_variant	0		5e-10	9.30103				Affymetrix, Illumina [~ 2400000] (imputed)	N
8218	2012-08-15	22581228	Manning AK	2012-05-13	Nat Genet	www.ncbi.nlm.nih.gov/pubmed/22581228	A genome-wide approach accounting for body mass index identifies genetic variants influencing fasting glycemic traits and insulin resistance.	Fasting glucose-related traits (interaction with BMI)	Up to 58,074 European ancestry individuals	Up tp 38,422 European ancestry individuals	8p23.1	8	9326086	PPP1R3B	LOC157273	NA	NA	157273	NA	NA	rs4841132-?	rs4841132	NA	4841132	non_coding_transcript_exon_variant	0		8e-09	8.09691				Affymetrix, Illumina [~ 2400000] (imputed)	N
8220	2012-08-15	22581228	Manning AK	2012-05-13	Nat Genet	www.ncbi.nlm.nih.gov/pubmed/22581228	A genome-wide approach accounting for body mass index identifies genetic variants influencing fasting glycemic traits and insulin resistance.	Fasting glucose-related traits (interaction with BMI)	Up to 58,074 European ancestry individuals	Up tp 38,422 European ancestry individuals	2p23.2	2	27772914	MRPL33	MRPL33	NA	NA	9553	NA	NA	rs3736594-?	rs3736594	NA	3736594	intron_variant	0		1e-15	15				Affymetrix, Illumina [~ 2400000] (imputed)	N
8221	2012-08-15	22581228	Manning AK	2012-05-13	Nat Genet	www.ncbi.nlm.nih.gov/pubmed/22581228	A genome-wide approach accounting for body mass index identifies genetic variants influencing fasting glycemic traits and insulin resistance.	Fasting glucose-related traits (interaction with BMI)	Up to 58,074 European ancestry individuals	Up tp 38,422 European ancestry individuals	11p15.4	11	8222251	LMO1	LOC101927936 - LMO1	101927936	4004		42004	2053	rs11041816-?	rs11041816	NA	11041816	downstream_gene_variant	0		2e-07	6.69897				Affymetrix, Illumina [~ 2400000] (imputed)	N
8222	2012-08-15	22581228	Manning AK	2012-05-13	Nat Genet	www.ncbi.nlm.nih.gov/pubmed/22581228	A genome-wide approach accounting for body mass index identifies genetic variants influencing fasting glycemic traits and insulin resistance.	Fasting glucose-related traits (interaction with BMI)	Up to 58,074 European ancestry individuals	Up tp 38,422 European ancestry individuals	6p24.3	6	7240344	RREB1	RREB1	NA	NA	6239	NA	NA	rs2714337-?	rs2714337	NA	2714337	intron_variant	0		3e-07	6.52288				Affymetrix, Illumina [~ 2400000] (imputed)	N
8223	2012-08-15	22581228	Manning AK	2012-05-13	Nat Genet	www.ncbi.nlm.nih.gov/pubmed/22581228	A genome-wide approach accounting for body mass index identifies genetic variants influencing fasting glycemic traits and insulin resistance.	Fasting glucose-related traits (interaction with BMI)	Up to 58,074 European ancestry individuals	Up tp 38,422 European ancestry individuals	14q32.11	14	89568628	FOXN3	FOXN3	NA	NA	1112	NA	NA	rs8004664-?	rs8004664	NA	8004664	intron_variant	0		3e-06	5.52288				Affymetrix, Illumina [~ 2400000] (imputed)	N
8224	2012-08-15	22581228	Manning AK	2012-05-13	Nat Genet	www.ncbi.nlm.nih.gov/pubmed/22581228	A genome-wide approach accounting for body mass index identifies genetic variants influencing fasting glycemic traits and insulin resistance.	Fasting glucose-related traits (interaction with BMI)	Up to 58,074 European ancestry individuals	Up tp 38,422 European ancestry individuals	12q24.31	12	121500382	FBXL10	KDM2B	NA	NA	84678	NA	NA	rs10849893-?	rs10849893	NA	10849893	intron_variant	0		2e-06	5.69897				Affymetrix, Illumina [~ 2400000] (imputed)	N
8225	2012-08-15	22581228	Manning AK	2012-05-13	Nat Genet	www.ncbi.nlm.nih.gov/pubmed/22581228	A genome-wide approach accounting for body mass index identifies genetic variants influencing fasting glycemic traits and insulin resistance.	Fasting glucose-related traits (interaction with BMI)	Up to 58,074 European ancestry individuals	Up tp 38,422 European ancestry individuals	7p12.1	7	50683393	GRB10	GRB10	NA	NA	2887	NA	NA	rs10248619-?	rs10248619	NA	10248619	intron_variant	0		8e-08	7.09691				Affymetrix, Illumina [~ 2400000] (imputed)	N
8593	2012-08-15	22581228	Manning AK	2012-05-13	Nat Genet	www.ncbi.nlm.nih.gov/pubmed/22581228	A genome-wide approach accounting for body mass index identifies genetic variants influencing fasting glycemic traits and insulin resistance.	Fasting glucose-related traits (interaction with BMI)	Up to 58,074 European ancestry individuals	Up tp 38,422 European ancestry individuals	3q27.2	3	185811292	IGF2BP2	IGF2BP2	NA	NA	10644	NA	NA	rs1470579-?	rs1470579	NA	1470579	intron_variant	0	NR	6e-07	6.22185				Affymetrix, Illumina [~ 2400000] (imputed)	N
8599	2012-08-15	22581228	Manning AK	2012-05-13	Nat Genet	www.ncbi.nlm.nih.gov/pubmed/22581228	A genome-wide approach accounting for body mass index identifies genetic variants influencing fasting glycemic traits and insulin resistance.	Fasting glucose-related traits (interaction with BMI)	Up to 58,074 European ancestry individuals	Up tp 38,422 European ancestry individuals	9p21.3	9	22134095	CDKN2B	CDKN2B-AS1 - DMRTA1	100048912	63951		12998	312746	rs10811661-?	rs10811661	NA	10811661	intergenic_variant	0	NR	7e-06	5.1549				Affymetrix, Illumina [~ 2400000] (imputed)	N
12675	2015-05-29	25223902	Go MJ	2014-09-16	Genomics	www.ncbi.nlm.nih.gov/pubmed/25223902	A genome-wide association study identifies a LEPR gene as a novel predisposing factor for childhood fasting plasma glucose.	Fasting plasma glucose (childhood)	484 Korean ancestry children	776 Korean ancestry children	1p31.3	1	65704679	LEPR	LEPR - PDE4B	3953	5142		67186	87831	rs17407594-A	rs17407594	NA	17407594	intergenic_variant	0	NR	5e-08	7.30103		0.157	[0.10-0.21] mmol/l increase	Illumina [747076]	N
16917	2015-04-24	25187374	Hwang JY	2014-09-03	Diabetes	www.ncbi.nlm.nih.gov/pubmed/25187374	Genome-wide association meta-analysis identifies novel variants associated with fasting plasma glucose in East Asians.	Fasting plasma glucose	24,740 East Asian ancestry individuals	21,345 East Asian ancestry individuals	9p24.3	9	622523	KANK1	KANK1	NA	NA	23189	NA	NA	rs10815355-?	rs10815355	NA	10815355	intron_variant	0	NR	1e-09	9		0.045	[0.031-0.059] unit increase	Affymetrix, Illumina [up to 2315813] (imputed)	N
16918	2015-04-24	25187374	Hwang JY	2014-09-03	Diabetes	www.ncbi.nlm.nih.gov/pubmed/25187374	Genome-wide association meta-analysis identifies novel variants associated with fasting plasma glucose in East Asians.	Fasting plasma glucose	24,740 East Asian ancestry individuals	21,345 East Asian ancestry individuals	15q26.3	15	98715481	IGF1R	IGF1R	NA	NA	3480	NA	NA	rs2018860-?	rs2018860	NA	2018860	intron_variant	0	NR	3e-08	7.52288		0.031	[0.019-0.043] unit increase	Affymetrix, Illumina [up to 2315813] (imputed)	N
16920	2015-04-24	25187374	Hwang JY	2014-09-03	Diabetes	www.ncbi.nlm.nih.gov/pubmed/25187374	Genome-wide association meta-analysis identifies novel variants associated with fasting plasma glucose in East Asians.	Fasting plasma glucose	24,740 East Asian ancestry individuals	21,345 East Asian ancestry individuals	2p21	2	44961214	SIX2, SIX3	SIX3	NA	NA	6496	NA	NA	rs895636-?	rs895636	NA	895636	non_coding_transcript_exon_variant	0	NR	3e-13	12.5229		0.069	[0.049-0.089] unit increase	Affymetrix, Illumina [up to 2315813] (imputed)	N
16921	2015-04-24	25187374	Hwang JY	2014-09-03	Diabetes	www.ncbi.nlm.nih.gov/pubmed/25187374	Genome-wide association meta-analysis identifies novel variants associated with fasting plasma glucose in East Asians.	Fasting plasma glucose	24,740 East Asian ancestry individuals	21,345 East Asian ancestry individuals	2q24.3	2	168898336	G6PC2, ABCC11	SPC25 - G6PC2	57405	57818		7902	2904	rs13387347-?	rs13387347	NA	13387347	intron_variant	0	NR	2e-36	35.699		0.114	[0.096-0.132] unit increase	Affymetrix, Illumina [up to 2315813] (imputed)	N
16922	2015-04-24	25187374	Hwang JY	2014-09-03	Diabetes	www.ncbi.nlm.nih.gov/pubmed/25187374	Genome-wide association meta-analysis identifies novel variants associated with fasting plasma glucose in East Asians.	Fasting plasma glucose	24,740 East Asian ancestry individuals	21,345 East Asian ancestry individuals	6p22.3	6	20685255	CDKAL1	CDKAL1	NA	NA	54901	NA	NA	rs9356744-?	rs9356744	NA	9356744	intron_variant	0	NR	9e-10	9.04576		0.057	[0.039-0.075] unit increase	Affymetrix, Illumina [up to 2315813] (imputed)	N

## Sheet: Fasting.Glusose.Genes
	Description	Associated Gene Name	Chromosome Name	Gene Start (bp)	Gene End (bp)	Strand	Gene type
ENSG00000229609	long intergenic non-protein coding RNA 1079 [Source:HGNC Symbol;Acc:HGNC:49122]	LINC01079	13	27373348	27374366	1	lincRNA
ENSG00000260704	long intergenic non-protein coding RNA 543 [Source:HGNC Symbol;Acc:HGNC:43678]	LINC00543	13	27953526	27955370	1	lincRNA
ENSG00000140416	tropomyosin 1 (alpha) [Source:HGNC Symbol;Acc:HGNC:12010]	TPM1	15	63042632	63071915	1	protein_coding
ENSG00000103642	lactamase beta [Source:HGNC Symbol;Acc:HGNC:16468]	LACTB	15	63121800	63142061	1	protein_coding
ENSG00000185088	ribosomal protein S27 like [Source:HGNC Symbol;Acc:HGNC:18476]	RPS27L	15	63125872	63158021	-1	protein_coding
ENSG00000170122	forkhead box D4 [Source:HGNC Symbol;Acc:HGNC:3805]	FOXD4	9	116231	118204	-1	protein_coding
ENSG00000172785	COBW domain containing 1 [Source:HGNC Symbol;Acc:HGNC:17134]	CBWD1	9	121038	179147	-1	protein_coding
ENSG00000183784	chromosome 9 open reading frame 66 [Source:HGNC Symbol;Acc:HGNC:26436]	C9orf66	9	212824	215741	-1	protein_coding
ENSG00000238034		RP5-1185K9.1	20	21947647	21970783	1	lincRNA
ENSG00000234435	long intergenic non-protein coding RNA 1432 [Source:HGNC Symbol;Acc:HGNC:50745]	LINC01432	20	22054090	22074654	1	lincRNA
ENSG00000234862		RP5-1097P24.1	20	22220554	22223283	1	lincRNA
ENSG00000225321	long intergenic non-protein coding RNA 1427 [Source:HGNC Symbol;Acc:HGNC:50737]	LINC01427	20	22263065	22284029	-1	lincRNA
ENSG00000204684		RP5-1004I9.1	20	22371216	22471557	-1	lincRNA
ENSG00000259974	long intergenic non-protein coding RNA 261 [Source:HGNC Symbol;Acc:HGNC:16189]	LINC00261	20	22547671	22578642	-1	lincRNA
ENSG00000237396	long intergenic non-protein coding RNA 1384 [Source:HGNC Symbol;Acc:HGNC:50656]	LINC01384	20	22587522	22607517	-1	lincRNA
ENSG00000230400		RP11-359G22.2	20	22668484	22685344	-1	lincRNA
ENSG00000233746	long intergenic non-protein coding RNA 656 [Source:HGNC Symbol;Acc:HGNC:27304]	LINC00656	20	23125068	23132621	-1	lincRNA
ENSG00000230387		RP4-737E23.2	20	23187961	23190307	1	lincRNA
ENSG00000260202		RP3-333B15.4	20	23481645	23519054	-1	lincRNA
ENSG00000107099	dedicator of cytokinesis 8 [Source:HGNC Symbol;Acc:HGNC:19191]	DOCK8	9	214854	465259	1	protein_coding
ENSG00000107104	KN motif and ankyrin repeat domains 1 [Source:HGNC Symbol;Acc:HGNC:19309]	KANK1	9	470291	746106	1	protein_coding
ENSG00000137090	doublesex and mab-3 related transcription factor 1 [Source:HGNC Symbol;Acc:HGNC:2934]	DMRT1	9	841690	969090	1	protein_coding
ENSG00000064218	doublesex and mab-3 related transcription factor 3 [Source:HGNC Symbol;Acc:HGNC:13909]	DMRT3	9	976964	991731	1	protein_coding
ENSG00000173253	doublesex and mab-3 related transcription factor 2 [Source:HGNC Symbol;Acc:HGNC:2935]	DMRT2	9	1049858	1057552	1	protein_coding
ENSG00000173281	protein phosphatase 1 regulatory subunit 3B [Source:HGNC Symbol;Acc:HGNC:14942]	PPP1R3B	8	9136255	9151574	-1	protein_coding
ENSG00000253426		RP11-10A14.4	8	9151742	9168136	1	lincRNA
ENSG00000173273	tankyrase, TRF1-interacting ankyrin-related ADP-ribose polymerase [Source:HGNC Symbol;Acc:HGNC:11941]	TNKS	8	9555914	9782346	1	protein_coding
ENSG00000175806	methionine sulfoxide reductase A [Source:HGNC Symbol;Acc:HGNC:7377]	MSRA	8	10054268	10428891	1	protein_coding
ENSG00000080298	regulatory factor X3 [Source:HGNC Symbol;Acc:HGNC:9984]	RFX3	9	3218297	3526004	-1	protein_coding
ENSG00000107249	GLIS family zinc finger 3 [Source:HGNC Symbol;Acc:HGNC:28510]	GLIS3	9	3824127	4348392	-1	protein_coding
ENSG00000259616		RP11-507B12.2	15	61298791	61635449	-1	lincRNA
ENSG00000259530		RP11-259A24.1	15	61598514	61605241	1	lincRNA
ENSG00000259675		RP11-507B12.1	15	61639349	61715171	-1	lincRNA
ENSG00000106688	solute carrier family 1 (neuronal/epithelial high affinity glutamate transporter, system Xag), member 1 [Source:HGNC Symbol;Acc:HGNC:10939]	SLC1A1	9	4490444	4587469	1	protein_coding
ENSG00000259284		RP11-162I7.1	15	61729850	61731389	1	lincRNA
ENSG00000259697		RP11-299H22.1	15	62196145	62203318	-1	lincRNA
ENSG00000259878		RP11-1O10.1	15	62230384	62231895	-1	lincRNA
ENSG00000106686	spermatogenesis associated 6-like [Source:HGNC Symbol;Acc:HGNC:25472]	SPATA6L	9	4553386	4666674	-1	protein_coding
ENSG00000261296		RP11-299H22.6	15	62274163	62278365	1	lincRNA
ENSG00000260957		RP11-299H22.7	15	62284190	62285006	1	lincRNA
ENSG00000259727		RP11-1069G10.2	15	62895812	62899543	1	lincRNA
ENSG00000259672		RP11-69G7.1	15	63098870	63110403	1	lincRNA
ENSG00000205808	phospholipid phosphatase 6 [Source:HGNC Symbol;Acc:HGNC:23682]	PLPP6	9	4662315	4665258	1	protein_coding
ENSG00000106993	cell division cycle 37-like 1 [Source:HGNC Symbol;Acc:HGNC:17179]	CDC37L1	9	4679559	4708398	1	protein_coding
ENSG00000147853	adenylate kinase 3 [Source:HGNC Symbol;Acc:HGNC:17376]	AK3	9	4709559	4742043	-1	protein_coding
ENSG00000253505		CTA-398F10.1	8	8414690	8424632	-1	lincRNA
ENSG00000254153		CTA-398F10.2	8	8456909	8461337	-1	lincRNA
ENSG00000120158	RNA terminal phosphate cyclase-like 1 [Source:HGNC Symbol;Acc:HGNC:17687]	RCL1	9	4792869	4885917	1	protein_coding
ENSG00000253343		CTD-3023L14.3	8	8555738	8560965	-1	lincRNA
ENSG00000253774		CTD-3023L14.1	8	8559894	8562124	1	lincRNA
ENSG00000253130		CTD-3023L14.2	8	8561391	8569688	1	lincRNA
ENSG00000254367		RP11-211C9.1	8	8723693	8782479	-1	lincRNA
ENSG00000253252		RP11-10A14.6	8	9180251	9182519	-1	lincRNA
ENSG00000096968	Janus kinase 2 [Source:HGNC Symbol;Acc:HGNC:6192]	JAK2	9	4985033	5128183	1	protein_coding
ENSG00000248538		RP11-10A14.5	8	9189011	9202854	1	lincRNA
ENSG00000254235		RP11-115J16.1	8	9249417	9413714	1	lincRNA
ENSG00000120210	insulin like 6 [Source:HGNC Symbol;Acc:HGNC:6089]	INSL6	9	5131979	5185668	-1	protein_coding
ENSG00000253887		RP11-10A14.7	8	9255349	9260295	-1	lincRNA
ENSG00000120211	insulin like 4 [Source:HGNC Symbol;Acc:HGNC:6087]	INSL4	9	5231419	5235304	1	protein_coding
ENSG00000253735		RP11-115J16.3	8	9351238	9358441	-1	lincRNA
ENSG00000254237		RP11-115J16.2	8	9371970	9436205	-1	lincRNA
ENSG00000253230	long intergenic non-protein coding RNA 599 [Source:HGNC Symbol;Acc:HGNC:27231]	LINC00599	8	9900064	9905366	-1	lincRNA
ENSG00000163793	DnaJ heat shock protein family (Hsp40) member C5 gamma [Source:HGNC Symbol;Acc:HGNC:24844]	DNAJC5G	2	27275421	27281499	1	protein_coding
ENSG00000213639	protein phosphatase 1, catalytic subunit, beta isozyme [Source:HGNC Symbol;Acc:HGNC:9282]	PPP1CB	2	28751640	28802940	1	protein_coding
ENSG00000175348	TMEM9 domain family member B [Source:HGNC Symbol;Acc:HGNC:1168]	TMEM9B	11	8947294	8965011	-1	protein_coding
ENSG00000075651	phospholipase D1 [Source:HGNC Symbol;Acc:HGNC:9067]	PLD1	3	171600405	171810950	-1	protein_coding
ENSG00000104983	coiled-coil domain containing 61 [Source:HGNC Symbol;Acc:HGNC:33629]	CCDC61	19	45995461	46021318	1	protein_coding
ENSG00000138032	protein phosphatase, Mg2+/Mn2+ dependent 1B [Source:HGNC Symbol;Acc:HGNC:9276]	PPM1B	2	44167969	44244384	1	protein_coding
ENSG00000261211		RP1-80N2.3	6	6680309	6683633	-1	lincRNA
ENSG00000226281		RP1-80N2.2	6	6692744	6711002	-1	lincRNA
ENSG00000224532		RP3-470L22.1	6	6758276	6759291	-1	lincRNA
ENSG00000223342		RP3-429O6.1	6	6901022	6918715	-1	lincRNA
ENSG00000203498		RP11-556O15.1	6	6993191	6995554	1	lincRNA
ENSG00000175352	nuclear receptor interacting protein 3 [Source:HGNC Symbol;Acc:HGNC:1167]	NRIP3	11	8980576	9004049	-1	protein_coding
ENSG00000008438	peptidoglycan recognition protein 1 [Source:HGNC Symbol;Acc:HGNC:8904]	PGLYRP1	19	46019153	46023065	-1	protein_coding
ENSG00000204869	IGF like family member 4 [Source:HGNC Symbol;Acc:HGNC:32931]	IGFL4	19	46039748	46077118	-1	protein_coding
ENSG00000188624	IGF like family member 3 [Source:HGNC Symbol;Acc:HGNC:32930]	IGFL3	19	46120071	46124674	-1	protein_coding
ENSG00000164308	endoplasmic reticulum aminopeptidase 2 [Source:HGNC Symbol;Acc:HGNC:29499]	ERAP2	5	96875939	96919716	1	protein_coding
ENSG00000175356	signal peptide, CUB domain, EGF-like 2 [Source:HGNC Symbol;Acc:HGNC:30425]	SCUBE2	11	9020391	9138114	-1	protein_coding
ENSG00000258678		RP11-1078H9.1	14	90452063	90455117	-1	lincRNA
ENSG00000233208	long intergenic non-protein coding RNA 642 [Source:HGNC Symbol;Acc:HGNC:44293]	LINC00642	14	90455230	90458905	1	lincRNA
ENSG00000138100	tripartite motif containing 54 [Source:HGNC Symbol;Acc:HGNC:16008]	TRIM54	2	27282392	27307439	1	protein_coding
ENSG00000259789		RP11-1078H9.6	14	90489012	90491637	-1	lincRNA
ENSG00000073792	insulin like growth factor 2 mRNA binding protein 2 [Source:HGNC Symbol;Acc:HGNC:28867]	IGF2BP2	3	185643739	185825056	-1	protein_coding
ENSG00000258935		RP11-1078H9.2	14	90567495	90569976	1	lincRNA
ENSG00000239628		RP11-543D10.2	3	170345678	170353961	1	lincRNA
ENSG00000242578		RP11-469J4.3	3	170410512	170418615	1	lincRNA
ENSG00000204866	IGF like family member 2 [Source:HGNC Symbol;Acc:HGNC:32929]	IGFL2	19	46143106	46161299	1	protein_coding
ENSG00000239739		RP11-373E16.4	3	170740351	170741365	-1	lincRNA
ENSG00000240497		RP11-185E8.1	3	171468084	171469633	1	lincRNA
ENSG00000163794	urocortin [Source:HGNC Symbol;Acc:HGNC:12516]	UCN	2	27307400	27308445	-1	protein_coding
ENSG00000259478		RP11-753A21.1	15	97982509	97991142	-1	lincRNA
ENSG00000234717	TMEM212 antisense RNA 1 [Source:HGNC Symbol;Acc:HGNC:41939]	TMEM212-AS1	3	171876352	171900740	-1	lincRNA
ENSG00000258483		AC144835.1	15	98003081	98021777	1	lincRNA
ENSG00000259199		CTD-2544M6.1	15	98046667	98293177	-1	lincRNA
ENSG00000188293	IGF like family member 1 [Source:HGNC Symbol;Acc:HGNC:24093]	IGFL1	19	46229752	46231243	1	protein_coding
ENSG00000259611	long intergenic non-protein coding RNA 1582 [Source:HGNC Symbol;Acc:HGNC:51416]	LINC01582	15	98085627	98103712	-1	lincRNA
ENSG00000237404		RP3-471C18.2	6	19689825	19753113	-1	lincRNA
ENSG00000227116		RP3-471C18.1	6	19730427	19734567	-1	lincRNA
ENSG00000228412		RP4-625H18.2	6	19802164	19804752	-1	lincRNA
ENSG00000227089		RP1-135L22.1	6	21354411	21355296	-1	lincRNA
ENSG00000231754		RP11-204E9.1	6	21522476	21523772	-1	lincRNA
ENSG00000259320		RP11-183E24.2	15	98122563	98131607	-1	lincRNA
ENSG00000259041		RP11-167B3.1	15	98282075	98285907	1	lincRNA
ENSG00000115204	MpV17 mitochondrial inner membrane protein [Source:HGNC Symbol;Acc:HGNC:7224]	MPV17	2	27309492	27325680	-1	protein_coding
ENSG00000124440	hypoxia inducible factor 3, alpha subunit [Source:HGNC Symbol;Acc:HGNC:15825]	HIF3A	19	46297046	46343433	1	protein_coding
ENSG00000259590		RP11-20G13.3	15	99395179	99396593	-1	lincRNA
ENSG00000259341		RP11-20G13.1	15	99427009	99431028	-1	lincRNA
ENSG00000225233		RP11-554K11.2	1	213492301	213546447	1	lincRNA
ENSG00000228255		RP11-323I1.1	1	213731416	213794587	1	lincRNA
ENSG00000096696	desmoplakin [Source:HGNC Symbol;Acc:HGNC:3052]	DSP	6	7541575	7586717	1	protein_coding
ENSG00000135100	HNF1 homeobox A [Source:HGNC Symbol;Acc:HGNC:11621]	HNF1A	12	120978543	121002512	1	protein_coding
ENSG00000231485		RP4-535B20.1	1	65066627	65067737	-1	lincRNA
ENSG00000249917	long intergenic non-protein coding RNA 536 [Source:HGNC Symbol;Acc:HGNC:43645]	LINC00536	8	115950511	116325059	-1	lincRNA
ENSG00000184014	DENN/MADD domain containing 5A [Source:HGNC Symbol;Acc:HGNC:19344]	DENND5A	11	9138825	9265390	-1	protein_coding
ENSG00000250392		RP11-700N1.1	4	119939540	119964293	1	lincRNA
ENSG00000253825		RP11-96A1.5	4	120035033	120040615	-1	lincRNA
ENSG00000113441	leucyl/cystinyl aminopeptidase [Source:HGNC Symbol;Acc:HGNC:6656]	LNPEP	5	96935394	97037515	1	protein_coding
ENSG00000011485	protein phosphatase 5, catalytic subunit [Source:HGNC Symbol;Acc:HGNC:9322]	PPP5C	19	46346994	46392981	1	protein_coding
ENSG00000249409		RP11-501E14.1	4	120639090	120650796	1	lincRNA
ENSG00000250344		RP11-647P12.1	4	121071429	121080476	1	lincRNA
ENSG00000261501		RP11-63B13.1	4	121870583	121872848	1	lincRNA
ENSG00000253672		RP11-536K17.1	8	116402543	116403757	-1	lincRNA
ENSG00000169515	coiled-coil domain containing 8 [Source:HGNC Symbol;Acc:HGNC:25367]	CCDC8	19	46410372	46413584	-1	protein_coding
ENSG00000259439		RP11-89K21.1	2	44921077	44939199	-1	lincRNA
ENSG00000182013	paraneoplastic Ma antigen family-like 1 [Source:HGNC Symbol;Acc:HGNC:25578]	PNMAL1	19	46466491	46471563	-1	protein_coding
ENSG00000230510	PPP5 tetratricopeptide repeat domain containing 1 [Source:HGNC Symbol;Acc:HGNC:44209]	PPP5D1	19	46480796	46601200	-1	protein_coding
ENSG00000225156		AC012354.6	2	44954664	44968762	1	lincRNA
ENSG00000231156		AC093702.1	2	45013214	45013668	-1	lincRNA
ENSG00000145721	limb and CNS expressed 1 [Source:HGNC Symbol;Acc:HGNC:18581]	LIX1	5	97091867	97142872	-1	protein_coding
ENSG00000172201	inhibitor of DNA binding 4, dominant negative helix-loop-helix protein [Source:HGNC Symbol;Acc:HGNC:5363]	ID4	6	19837386	19840684	1	protein_coding
ENSG00000138079	solute carrier family 3 (amino acid transporter heavy chain), member 1 [Source:HGNC Symbol;Acc:HGNC:11025]	SLC3A1	2	44275458	44321494	1	protein_coding
ENSG00000231054		AC009236.2	2	45168583	45169414	1	lincRNA
ENSG00000172197	membrane bound O-acyltransferase domain containing 1 [Source:HGNC Symbol;Acc:HGNC:21579]	MBOAT1	6	20102145	20212399	-1	protein_coding
ENSG00000253381		RP11-359E19.1	8	40104169	40107935	1	lincRNA
ENSG00000253665		RP11-359E19.2	8	40114651	40127468	1	lincRNA
ENSG00000254143		RP11-470M17.2	8	40161458	40172612	1	lincRNA
ENSG00000115207	general transcription factor IIIC subunit 2 [Source:HGNC Symbol;Acc:HGNC:4665]	GTF3C2	2	27325849	27357034	-1	protein_coding
ENSG00000253802		CTA-392C11.1	8	40298741	40343402	-1	lincRNA
ENSG00000253354		CTA-392C11.2	8	40370028	40401848	1	lincRNA
ENSG00000254383		RP11-465K16.1	8	40900016	40901854	-1	lincRNA
ENSG00000168566	small nuclear ribonucleoprotein, U11/U12 48KDa subunit [Source:HGNC Symbol;Acc:HGNC:21368]	SNRNP48	6	7590199	7611967	1	protein_coding
ENSG00000253396		RP11-15G16.1	8	41435298	41440419	1	lincRNA
ENSG00000255179		RP11-324J3.1	11	7222933	7230863	1	lincRNA
ENSG00000152484	ubiquitin specific peptidase 12 [Source:HGNC Symbol;Acc:HGNC:20485]	USP12	13	27066142	27171896	-1	protein_coding
ENSG00000157895	chromosome 12 open reading frame 43 [Source:HGNC Symbol;Acc:HGNC:25719]	C12orf43	12	121000486	121016502	-1	protein_coding
ENSG00000204851	paraneoplastic Ma antigen family-like 2 [Source:HGNC Symbol;Acc:HGNC:29206]	PNMAL2	19	46486906	46496498	-1	protein_coding
ENSG00000160014	calmodulin 3 (phosphorylase kinase, delta) [Source:HGNC Symbol;Acc:HGNC:1449]	CALM3	19	46601074	46610793	1	protein_coding
ENSG00000166211	Spi-C transcription factor (Spi-1/PU.1 related) [Source:HGNC Symbol;Acc:HGNC:29549]	SPIC	12	101475421	101486997	1	protein_coding
ENSG00000267037		AC005757.7	19	45149750	45150605	-1	lincRNA
ENSG00000267045		AC006126.4	19	45238632	45245370	-1	lincRNA
ENSG00000058729	RIO kinase 2 [Source:HGNC Symbol;Acc:HGNC:18999]	RIOK2	5	97160867	97183260	-1	protein_coding
ENSG00000186329	transmembrane protein 212 [Source:HGNC Symbol;Acc:HGNC:34295]	TMEM212	3	171843349	171938715	1	protein_coding
ENSG00000122026	ribosomal protein L21 [Source:HGNC Symbol;Acc:HGNC:10313]	RPL21	13	27251309	27256691	1	protein_coding
ENSG00000268401		CTC-344H19.4	19	46027654	46030161	1	lincRNA
ENSG00000267922		AC007193.6	19	46101122	46196218	1	lincRNA
ENSG00000246820		RP11-379P15.1	11	8169167	8178903	1	lincRNA
ENSG00000269729		AC006262.4	19	46163893	46180647	-1	lincRNA
ENSG00000135114	2'-5'-oligoadenylate synthetase-like [Source:HGNC Symbol;Acc:HGNC:8090]	OASL	12	121019111	121039242	-1	protein_coding
ENSG00000268621		AC006262.5	19	46189166	46203083	-1	lincRNA
ENSG00000160013	prostaglandin I2 (prostacyclin) receptor (IP) [Source:HGNC Symbol;Acc:HGNC:9602]	PTGIR	19	46620468	46625118	-1	protein_coding
ENSG00000167414	guanine nucleotide binding protein (G protein), gamma 8 [Source:HGNC Symbol;Acc:HGNC:19664]	GNG8	19	46634076	46634685	-1	protein_coding
ENSG00000122035	RAS-like family 11 member A [Source:HGNC Symbol;Acc:HGNC:23802]	RASL11A	13	27270327	27273690	1	protein_coding
ENSG00000197380	dishevelled-binding antagonist of beta-catenin 3 [Source:HGNC Symbol;Acc:HGNC:30745]	DACT3	19	46647612	46661138	-1	protein_coding
ENSG00000122034	general transcription factor IIIA [Source:HGNC Symbol;Acc:HGNC:4662]	GTF3A	13	27424544	27435823	1	protein_coding
ENSG00000254874		RP11-676F20.1	11	92965797	92966603	1	lincRNA
ENSG00000255233		RP11-755E23.3	11	93240133	93241168	1	lincRNA
ENSG00000105287	protein kinase D2 [Source:HGNC Symbol;Acc:HGNC:17293]	PRKD2	19	46674275	46717127	-1	protein_coding
ENSG00000153162	bone morphogenetic protein 6 [Source:HGNC Symbol;Acc:HGNC:1073]	BMP6	6	7726797	7881422	1	protein_coding
ENSG00000122033	mitochondrial translational initiation factor 3 [Source:HGNC Symbol;Acc:HGNC:29788]	MTIF3	13	27435643	27450591	-1	protein_coding
ENSG00000258435		RP11-711D18.2	12	121391962	121399859	1	lincRNA
ENSG00000256742		RP13-941N14.1	12	121580792	121593504	1	lincRNA
ENSG00000239264	thioredoxin domain containing 5 (endoplasmic reticulum) [Source:HGNC Symbol;Acc:HGNC:21073]	TXNDC5	6	7881517	7910814	-1	protein_coding
ENSG00000212694	long intergenic non-protein coding RNA 1089 [Source:HGNC Symbol;Acc:HGNC:27886]	LINC01089	12	121795267	121803906	-1	lincRNA
ENSG00000139517	ligand of numb-protein X 2 [Source:HGNC Symbol;Acc:HGNC:20421]	LNX2	13	27545911	27620404	-1	protein_coding
ENSG00000186184	polymerase (RNA) I polypeptide D [Source:HGNC Symbol;Acc:HGNC:20422]	POLR1D	13	27620742	27667415	1	protein_coding
ENSG00000169840	GS homeobox 1 [Source:HGNC Symbol;Acc:HGNC:20374]	GSX1	13	27792643	27794768	1	protein_coding
ENSG00000139515	pancreatic and duodenal homeobox 1 [Source:HGNC Symbol;Acc:HGNC:6107]	PDX1	13	27920020	27926231	1	protein_coding
ENSG00000180389	ATP synthase, H+ transporting, mitochondrial F1 complex, epsilon subunit pseudogene 2 [Source:HGNC Symbol;Acc:HGNC:34026]	ATP5EP2	13	27945206	27945590	1	protein_coding
ENSG00000165556	caudal type homeobox 2 [Source:HGNC Symbol;Acc:HGNC:1806]	CDX2	13	27962137	27971139	-1	protein_coding
ENSG00000183463	ureidoimidazoline (2-oxo-4-hydroxy-4-carboxy-5-) decarboxylase [Source:HGNC Symbol;Acc:HGNC:17785]	URAD	13	27977714	27988654	-1	protein_coding
ENSG00000122025	fms-related tyrosine kinase 3 [Source:HGNC Symbol;Acc:HGNC:3765]	FLT3	13	28003274	28100592	-1	protein_coding
ENSG00000256733		RP11-881M11.8	11	61055737	61067535	1	lincRNA
ENSG00000255931		RP11-286N22.10	11	61496440	61500076	1	lincRNA
ENSG00000256443		RP11-794G24.1	11	61539516	61542259	-1	lincRNA
ENSG00000250230		RP11-855O10.2	11	61588494	61607550	1	lincRNA
ENSG00000259040	BLOC1S5-TXNDC5 readthrough (NMD candidate) [Source:HGNC Symbol;Acc:HGNC:42001]	BLOC1S5-TXNDC5	6	7881522	8064364	-1	protein_coding
ENSG00000152520	PAN3 poly(A) specific ribonuclease subunit [Source:HGNC Symbol;Acc:HGNC:29991]	PAN3	13	28138506	28295335	1	protein_coding
ENSG00000251209	long intergenic non-protein coding RNA 923 [Source:HGNC Symbol;Acc:HGNC:28088]	LINC00923	15	97572185	97874550	-1	lincRNA
ENSG00000255947		RP11-855O10.3	11	61654665	61655702	-1	lincRNA
ENSG00000124915	uncharacterized LOC26070 [Source:EntrezGene;Acc:26070]	DKFZP434K028	11	61746493	61757655	-1	lincRNA
ENSG00000140450	arrestin domain containing 4 [Source:HGNC Symbol;Acc:HGNC:28087]	ARRDC4	15	97960698	97973838	1	protein_coding
ENSG00000255856		RP11-87C12.5	12	122007434	122020063	-1	lincRNA
ENSG00000255553		RP11-810P12.5	11	62077277	62082184	-1	lincRNA
ENSG00000188428	biogenesis of lysosomal organelles complex-1, subunit 5, muted [Source:HGNC Symbol;Acc:HGNC:18561]	BLOC1S5	6	8013567	8064414	-1	protein_coding
ENSG00000185087	family with sequence similarity 169 member B [Source:HGNC Symbol;Acc:HGNC:26835]	FAM169B	15	98437162	98514382	-1	protein_coding
ENSG00000140443	insulin like growth factor 1 receptor [Source:HGNC Symbol;Acc:HGNC:5465]	IGF1R	15	98648971	98964530	1	protein_coding
ENSG00000112242	E2F transcription factor 3 [Source:HGNC Symbol;Acc:HGNC:3115]	E2F3	6	20401906	20493715	1	protein_coding
ENSG00000102755	fms-related tyrosine kinase 1 [Source:HGNC Symbol;Acc:HGNC:3763]	FLT1	13	28300344	28495128	-1	protein_coding
ENSG00000183571	pyroglutamyl-peptidase I-like [Source:HGNC Symbol;Acc:HGNC:27080]	PGPEP1L	15	98968230	99007795	-1	protein_coding
ENSG00000250955		AC008592.7	5	95964999	95986311	-1	lincRNA
ENSG00000182253	synemin [Source:HGNC Symbol;Acc:HGNC:24466]	SYNM	15	99098217	99135593	1	protein_coding
ENSG00000250551		RP11-254I22.1	5	96050115	96215519	1	lincRNA
ENSG00000265818	EEF1E1-BLOC1S5 readthrough (NMD candidate) [Source:HGNC Symbol;Acc:HGNC:49187]	EEF1E1-BLOC1S5	6	8015726	8102530	-1	protein_coding
ENSG00000124802	eukaryotic translation elongation factor 1 epsilon 1 [Source:HGNC Symbol;Acc:HGNC:3212]	EEF1E1	6	8073360	8102578	-1	protein_coding
ENSG00000249746		RP11-254I22.3	5	96213346	96215075	-1	lincRNA
ENSG00000250158		RP11-254I22.2	5	96247776	96278751	1	lincRNA
ENSG00000132963	proteasome maturation protein [Source:HGNC Symbol;Acc:HGNC:20330]	POMP	13	28659104	28678925	1	protein_coding
ENSG00000145996	CDK5 regulatory subunit associated protein 1-like 1 [Source:HGNC Symbol;Acc:HGNC:21050]	CDKAL1	6	20534457	21232404	1	protein_coding
ENSG00000089041	purinergic receptor P2X, ligand gated ion channel, 7 [Source:HGNC Symbol;Acc:HGNC:8537]	P2RX7	12	121132819	121188032	1	protein_coding
ENSG00000139508	solute carrier family 46 member 3 [Source:HGNC Symbol;Acc:HGNC:27501]	SLC46A3	13	28700064	28718970	-1	protein_coding
ENSG00000132938	microtubule associated tumor suppressor candidate 2 [Source:HGNC Symbol;Acc:HGNC:20595]	MTUS2	13	28820348	29505947	1	protein_coding
ENSG00000196091	myosin binding protein C, slow type [Source:HGNC Symbol;Acc:HGNC:7549]	MYBPC1	12	101568353	101686018	1	protein_coding
ENSG00000257097	CLIP1 antisense RNA 1 [Source:HGNC Symbol;Acc:HGNC:48586]	CLIP1-AS1	12	122395542	122400857	1	lincRNA
ENSG00000115211	eukaryotic translation initiation factor 2B subunit delta [Source:HGNC Symbol;Acc:HGNC:3260]	EIF2B4	2	27364352	27370486	-1	protein_coding
ENSG00000103852	tetratricopeptide repeat domain 23 [Source:HGNC Symbol;Acc:HGNC:25730]	TTC23	15	99136323	99251223	-1	protein_coding
ENSG00000168904	leucine rich repeat containing 28 [Source:HGNC Symbol;Acc:HGNC:28355]	LRRC28	15	99251362	99390729	1	protein_coding
ENSG00000124766	SRY-box 4 [Source:HGNC Symbol;Acc:HGNC:11200]	SOX4	6	21592769	21598619	1	protein_coding
ENSG00000115234	sorting nexin 17 [Source:HGNC Symbol;Acc:HGNC:14979]	SNX17	2	27370496	27377533	1	protein_coding
ENSG00000068305	myocyte enhancer factor 2A [Source:HGNC Symbol;Acc:HGNC:6993]	MEF2A	15	99565417	99716466	1	protein_coding
ENSG00000135124	purinergic receptor P2X, ligand gated ion channel, 4 [Source:HGNC Symbol;Acc:HGNC:8535]	P2RX4	12	121209857	121234106	1	protein_coding
ENSG00000175471	multiple C2 domains, transmembrane 1 [Source:HGNC Symbol;Acc:HGNC:26183]	MCTP1	5	94703741	95284575	-1	protein_coding
ENSG00000138078	prolyl endopeptidase-like [Source:HGNC Symbol;Acc:HGNC:30228]	PREPL	2	44316281	44361862	-1	protein_coding
ENSG00000227260		AC116035.1	3	30524745	30527185	1	lincRNA
ENSG00000227549		AC116035.2	3	30524990	30526213	-1	lincRNA
ENSG00000258308		RP11-554E23.2	12	101954998	101962390	-1	lincRNA
ENSG00000258169	long intergenic non-protein coding RNA 485 [Source:HGNC Symbol;Acc:HGNC:27476]	LINC00485	12	102809280	102824399	-1	lincRNA
ENSG00000136527	transformer 2 beta homolog (Drosophila) [Source:HGNC Symbol;Acc:HGNC:10781]	TRA2B	3	185915906	185938136	-1	protein_coding
ENSG00000168619	ADAM metallopeptidase domain 18 [Source:HGNC Symbol;Acc:HGNC:196]	ADAM18	8	39584489	39730064	1	protein_coding
ENSG00000115155	otoferlin [Source:HGNC Symbol;Acc:HGNC:8515]	OTOF	2	26457203	26558698	-1	protein_coding
ENSG00000227467	long intergenic non-protein coding RNA 1537 [Source:HGNC Symbol;Acc:HGNC:51301]	LINC01537	11	72570660	72573229	1	lincRNA
ENSG00000163795	zinc finger protein 513 [Source:HGNC Symbol;Acc:HGNC:26498]	ZNF513	2	27377231	27380790	-1	protein_coding
ENSG00000256568		RP11-800A3.3	11	73176694	73181696	1	lincRNA
ENSG00000115241	protein phosphatase, Mg2+/Mn2+ dependent 1G [Source:HGNC Symbol;Acc:HGNC:9278]	PPM1G	2	27381194	27409687	-1	protein_coding
ENSG00000110931	calcium/calmodulin-dependent protein kinase kinase 2, beta [Source:HGNC Symbol;Acc:HGNC:1470]	CAMKK2	12	121237691	121298308	-1	protein_coding
ENSG00000104755	ADAM metallopeptidase domain 2 [Source:HGNC Symbol;Acc:HGNC:198]	ADAM2	8	39743735	39838289	-1	protein_coding
ENSG00000153347	family with sequence similarity 81 member B [Source:HGNC Symbol;Acc:HGNC:26335]	FAM81B	5	95391344	95450454	1	protein_coding
ENSG00000115216	nuclear receptor binding protein 1 [Source:HGNC Symbol;Acc:HGNC:7993]	NRBP1	2	27427790	27442259	1	protein_coding
ENSG00000234548		RP11-78H24.1	3	186440345	186450696	1	lincRNA
ENSG00000224406		RP11-48F14.1	3	186454982	186493661	-1	lincRNA
ENSG00000226859		RP11-48F14.2	3	186476727	186478370	1	lincRNA
ENSG00000244405	ets variant 5 [Source:HGNC Symbol;Acc:HGNC:3494]	ETV5	3	186046308	186110318	-1	protein_coding
ENSG00000198677	tetratricopeptide repeat domain 37 [Source:HGNC Symbol;Acc:HGNC:23639]	TTC37	5	95463895	95555007	-1	protein_coding
ENSG00000143919	calmodulin-lysine N-methyltransferase [Source:HGNC Symbol;Acc:HGNC:26276]	CAMKMT	2	44361950	44772592	1	protein_coding
ENSG00000131203	indoleamine 2,3-dioxygenase 1 [Source:HGNC Symbol;Acc:HGNC:6059]	IDO1	8	39902275	39928444	1	protein_coding
ENSG00000157992	keratinocyte associated protein 3 [Source:HGNC Symbol;Acc:HGNC:28943]	KRTCAP3	2	27442366	27446481	1	protein_coding
ENSG00000188676	indoleamine 2,3-dioxygenase 2 [Source:HGNC Symbol;Acc:HGNC:27269]	IDO2	8	39934614	40016391	1	protein_coding
ENSG00000232233		RP11-573D15.2	3	186810880	186825521	-1	lincRNA
ENSG00000110104	coiled-coil domain containing 86 [Source:HGNC Symbol;Acc:HGNC:28359]	CCDC86	11	60842071	60851081	1	protein_coding
ENSG00000176907	chromosome 8 open reading frame 4 [Source:HGNC Symbol;Acc:HGNC:1357]	C8orf4	8	40153455	40155308	1	protein_coding
ENSG00000183134	prostaglandin D2 receptor 2 [Source:HGNC Symbol;Acc:HGNC:4502]	PTGDR2	11	60850940	60855971	-1	protein_coding
ENSG00000165061	zinc finger, matrin-type 4 [Source:HGNC Symbol;Acc:HGNC:25844]	ZMAT4	8	40530590	40897833	-1	protein_coding
ENSG00000149506	zona pellucida glycoprotein 1 [Source:HGNC Symbol;Acc:HGNC:13187]	ZP1	11	60867562	60875693	1	protein_coding
ENSG00000110107	pre-mRNA processing factor 19 [Source:HGNC Symbol;Acc:HGNC:17896]	PRPF19	11	60890730	60906588	-1	protein_coding
ENSG00000177047	interferon, omega 1 [Source:HGNC Symbol;Acc:HGNC:5448]	IFNW1	9	21140214	21142145	-1	protein_coding
ENSG00000137080	interferon, alpha 21 [Source:HGNC Symbol;Acc:HGNC:5424]	IFNA21	9	21165637	21166660	-1	protein_coding
ENSG00000164291	arylsulfatase family member K [Source:HGNC Symbol;Acc:HGNC:25239]	ARSK	5	95555074	95605064	1	protein_coding
ENSG00000236637	interferon, alpha 4 [Source:HGNC Symbol;Acc:HGNC:5425]	IFNA4	9	21186694	21228173	-1	protein_coding
ENSG00000214042	interferon, alpha 7 [Source:HGNC Symbol;Acc:HGNC:5428]	IFNA7	9	21201469	21202205	-1	protein_coding
ENSG00000186803	interferon, alpha 10 [Source:HGNC Symbol;Acc:HGNC:5418]	IFNA10	9	21206181	21207143	-1	protein_coding
ENSG00000147885	interferon, alpha 16 [Source:HGNC Symbol;Acc:HGNC:5421]	IFNA16	9	21216373	21217311	-1	protein_coding
ENSG00000234829	interferon, alpha 17 [Source:HGNC Symbol;Acc:HGNC:5422]	IFNA17	9	21227243	21228222	-1	protein_coding
ENSG00000228083	interferon, alpha 14 [Source:HGNC Symbol;Acc:HGNC:5420]	IFNA14	9	21239002	21239991	-1	protein_coding
ENSG00000147873	interferon, alpha 5 [Source:HGNC Symbol;Acc:HGNC:5426]	IFNA5	9	21304326	21305312	-1	protein_coding
ENSG00000198642	kelch like family member 9 [Source:HGNC Symbol;Acc:HGNC:18732]	KLHL9	9	21329671	21335380	-1	protein_coding
ENSG00000120235	interferon, alpha 6 [Source:HGNC Symbol;Acc:HGNC:5427]	IFNA6	9	21349835	21351378	-1	protein_coding
ENSG00000233816	interferon, alpha 13 [Source:HGNC Symbol;Acc:HGNC:5419]	IFNA13	9	21367424	21368962	-1	protein_coding
ENSG00000188379	interferon, alpha 2 [Source:HGNC Symbol;Acc:HGNC:5423]	IFNA2	9	21384254	21385388	-1	protein_coding
ENSG00000104332	secreted frizzled-related protein 1 [Source:HGNC Symbol;Acc:HGNC:10776]	SFRP1	8	41261958	41309497	-1	protein_coding
ENSG00000120242	interferon, alpha 8 [Source:HGNC Symbol;Acc:HGNC:5429]	IFNA8	9	21409147	21410185	1	protein_coding
ENSG00000197919	interferon, alpha 1 [Source:HGNC Symbol;Acc:HGNC:5417]	IFNA1	9	21409169	21441316	1	protein_coding
ENSG00000184995	interferon, epsilon [Source:HGNC Symbol;Acc:HGNC:18163]	IFNE	9	21480839	21482313	-1	protein_coding
ENSG00000099810	methylthioadenosine phosphorylase [Source:HGNC Symbol;Acc:HGNC:7413]	MTAP	9	21802543	21937651	1	protein_coding
ENSG00000058866	diacylglycerol kinase gamma [Source:HGNC Symbol;Acc:HGNC:2853]	DGKG	3	186105668	186362237	-1	protein_coding
ENSG00000147533	golgin A7 [Source:HGNC Symbol;Acc:HGNC:24876]	GOLGA7	8	41490396	41510980	1	protein_coding
ENSG00000110108	transmembrane protein 109 [Source:HGNC Symbol;Acc:HGNC:28771]	TMEM109	11	60913874	60923443	1	protein_coding
ENSG00000006118	transmembrane protein 132A [Source:HGNC Symbol;Acc:HGNC:31092]	TMEM132A	11	60924463	60937159	1	protein_coding
ENSG00000264545		RP11-145E5.5	9	21802636	22032986	1	protein_coding
ENSG00000224854	CDKN2A antisense RNA 1 (head to head) [Source:HGNC Symbol;Acc:HGNC:23831]	CDKN2A-AS1	9	21966929	21967751	1	lincRNA
ENSG00000178015	G protein-coupled receptor 150 [Source:HGNC Symbol;Acc:HGNC:23628]	GPR150	5	95620078	95622142	1	protein_coding
ENSG00000147889	cyclin-dependent kinase inhibitor 2A [Source:HGNC Symbol;Acc:HGNC:1787]	CDKN2A	9	21967753	21995301	-1	protein_coding
ENSG00000173557	chromosome 2 open reading frame 70 [Source:HGNC Symbol;Acc:HGNC:27938]	C2orf70	2	26562582	26579532	1	protein_coding
ENSG00000138002	intraflagellar transport 172 [Source:HGNC Symbol;Acc:HGNC:30391]	IFT172	2	27444371	27489789	-1	protein_coding
ENSG00000147883	cyclin-dependent kinase inhibitor 2B (p15, inhibits CDK4) [Source:HGNC Symbol;Acc:HGNC:1788]	CDKN2B	9	22002903	22009363	-1	protein_coding
ENSG00000175449	Rieske (Fe-S) domain containing [Source:HGNC Symbol;Acc:HGNC:29587]	RFESD	5	95646754	95684773	1	protein_coding
ENSG00000176399	DMRT-like family A1 [Source:HGNC Symbol;Acc:HGNC:13826]	DMRTA1	9	22446841	22455740	1	protein_coding
ENSG00000110446	solute carrier family 15 (oligopeptide transporter), member 3 [Source:HGNC Symbol;Acc:HGNC:18068]	SLC15A3	11	60937083	60952530	-1	protein_coding
ENSG00000147536	GINS complex subunit 4 (Sld5 homolog) [Source:HGNC Symbol;Acc:HGNC:28226]	GINS4	8	41529206	41545046	1	protein_coding
ENSG00000002746	HECT, C2 and WW domain containing E3 ubiquitin protein ligase 1 [Source:HGNC Symbol;Acc:HGNC:22195]	HECW1	7	43112599	43566001	1	protein_coding
ENSG00000089053	anaphase promoting complex subunit 5 [Source:HGNC Symbol;Acc:HGNC:15713]	ANAPC5	12	121308245	121399896	-1	protein_coding
ENSG00000013725	CD6 molecule [Source:HGNC Symbol;Acc:HGNC:1691]	CD6	11	60971680	61020377	1	protein_coding
ENSG00000138083	SIX homeobox 3 [Source:HGNC Symbol;Acc:HGNC:10889]	SIX3	2	44941898	44946077	1	protein_coding
ENSG00000170577	SIX homeobox 2 [Source:HGNC Symbol;Acc:HGNC:10888]	SIX2	2	45005161	45009430	-1	protein_coding
ENSG00000157884	calcium and integrin binding family member 4 [Source:HGNC Symbol;Acc:HGNC:33703]	CIB4	2	26581202	26641368	-1	protein_coding
ENSG00000145757	spermatogenesis associated 9 [Source:HGNC Symbol;Acc:HGNC:22988]	SPATA9	5	95652181	95698711	-1	protein_coding
ENSG00000171303	potassium channel, two pore domain subfamily K, member 3 [Source:HGNC Symbol;Acc:HGNC:6278]	KCNK3	2	26692690	26733420	1	protein_coding
ENSG00000158669	glycerol-3-phosphate acyltransferase 4 [Source:HGNC Symbol;Acc:HGNC:20880]	GPAT4	8	41577187	41625001	1	protein_coding
ENSG00000110448	CD5 molecule [Source:HGNC Symbol;Acc:HGNC:1685]	CD5	11	61102395	61127852	1	protein_coding
ENSG00000068784	S1 RNA binding domain 1 [Source:HGNC Symbol;Acc:HGNC:25521]	SRBD1	2	45388680	45612165	-1	protein_coding
ENSG00000213699	solute carrier family 35 member F6 [Source:HGNC Symbol;Acc:HGNC:26055]	SLC35F6	2	26764284	26781231	1	protein_coding
ENSG00000145808	ADAM metallopeptidase with thrombospondin type 1 motif 19 [Source:HGNC Symbol;Acc:HGNC:17111]	ADAMTS19	5	129460265	129738683	1	protein_coding
ENSG00000167987	vacuolar protein sorting 37 homolog C (S. cerevisiae) [Source:HGNC Symbol;Acc:HGNC:26097]	VPS37C	11	61130256	61161617	-1	protein_coding
ENSG00000115163	centromere protein A [Source:HGNC Symbol;Acc:HGNC:1851]	CENPA	2	26764289	26801067	1	protein_coding
ENSG00000186367	KIAA1024-like [Source:HGNC Symbol;Acc:HGNC:33914]	KIAA1024L	5	129748079	129766732	1	protein_coding
ENSG00000164292	Rho-related BTB domain containing 3 [Source:HGNC Symbol;Acc:HGNC:18757]	RHOBTB3	5	95713522	95824383	1	protein_coding
ENSG00000229859	pepsinogen 3, group I (pepsinogen A) [Source:HGNC Symbol;Acc:HGNC:8885]	PGA3	11	61203307	61213098	1	protein_coding
ENSG00000198108	chondroitin sulfate synthase 3 [Source:HGNC Symbol;Acc:HGNC:24293]	CHSY3	5	129904472	130186634	1	protein_coding
ENSG00000169567	histidine triad nucleotide binding protein 1 [Source:HGNC Symbol;Acc:HGNC:4912]	HINT1	5	131159027	131171735	-1	protein_coding
ENSG00000164543	serine/threonine kinase 17a [Source:HGNC Symbol;Acc:HGNC:11395]	STK17A	7	43582758	43626786	1	protein_coding
ENSG00000227938		AC104695.4	2	28448167	28450184	-1	lincRNA
ENSG00000157851	dihydropyrimidinase like 5 [Source:HGNC Symbol;Acc:HGNC:20637]	DPYSL5	2	26847747	26950351	1	protein_coding
ENSG00000186687	LYR motif containing 7 [Source:HGNC Symbol;Acc:HGNC:28072]	LYRM7	5	131170810	131205426	1	protein_coding
ENSG00000229183	pepsinogen 4, group I (pepsinogen A) [Source:HGNC Symbol;Acc:HGNC:8886]	PGA4	11	61222216	61231927	1	protein_coding
ENSG00000106603	cytochrome c oxidase assembly factor 1 homolog [Source:HGNC Symbol;Acc:HGNC:21868]	COA1	7	43608456	43729717	-1	protein_coding
ENSG00000173221	glutaredoxin [Source:HGNC Symbol;Acc:HGNC:4330]	GLRX	5	95751319	95823005	-1	protein_coding
ENSG00000256713	pepsinogen 5, group I (pepsinogen A) [Source:HGNC Symbol;Acc:HGNC:8887]	PGA5	11	61241042	61251448	1	protein_coding
ENSG00000106605	biliverdin reductase A [Source:HGNC Symbol;Acc:HGNC:1062]	BLVRA	7	43758680	43807342	1	protein_coding
ENSG00000170633	ring finger protein 34, E3 ubiquitin protein ligase [Source:HGNC Symbol;Acc:HGNC:17297]	RNF34	12	121400041	121430623	1	protein_coding
ENSG00000158985	CDC42 small effector 2 [Source:HGNC Symbol;Acc:HGNC:18547]	CDC42SE2	5	131245493	131398447	1	protein_coding
ENSG00000228434		AC004951.6	7	44004046	44007866	-1	lincRNA
ENSG00000236882	long intergenic non-protein coding RNA 1554 [Source:HGNC Symbol;Acc:HGNC:24687]	LINC01554	5	95852232	95860133	1	lincRNA
ENSG00000062582	mitochondrial ribosomal protein S24 [Source:HGNC Symbol;Acc:HGNC:14510]	MRPS24	7	43866558	43869893	-1	protein_coding
ENSG00000167992	von Willebrand factor C and EGF domains [Source:HGNC Symbol;Acc:HGNC:26487]	VWCE	11	61258286	61295424	-1	protein_coding
ENSG00000118985	elongation factor, RNA polymerase II, 2 [Source:HGNC Symbol;Acc:HGNC:17064]	ELL2	5	95885098	95962071	-1	protein_coding
ENSG00000106608	upregulator of cell proliferation [Source:HGNC Symbol;Acc:HGNC:30890]	URGCP	7	43875894	43926411	-1	protein_coding
ENSG00000084764	microtubule associated protein RP/EB family member 3 [Source:HGNC Symbol;Acc:HGNC:6892]	MAPRE3	2	26970612	27027196	1	protein_coding
ENSG00000213139	crystallin gamma S [Source:HGNC Symbol;Acc:HGNC:2417]	CRYGS	3	186538441	186546702	-1	protein_coding
ENSG00000113838	TBCC domain containing 1 [Source:HGNC Symbol;Acc:HGNC:25546]	TBCCD1	3	186546073	186570543	-1	protein_coding
ENSG00000175426	proprotein convertase subtilisin/kexin type 1 [Source:HGNC Symbol;Acc:HGNC:8743]	PCSK1	5	96390415	96434143	-1	protein_coding
ENSG00000089094	lysine (K)-specific demethylase 2B [Source:HGNC Symbol;Acc:HGNC:13610]	KDM2B	12	121429097	121581015	-1	protein_coding
ENSG00000078967	ubiquitin conjugating enzyme E2D 4 (putative) [Source:HGNC Symbol;Acc:HGNC:21647]	UBE2D4	7	43926438	43956136	1	protein_coding
ENSG00000158987	Rap guanine nucleotide exchange factor 6 [Source:HGNC Symbol;Acc:HGNC:20655]	RAPGEF6	5	131423921	131635236	-1	protein_coding
ENSG00000119777	transmembrane protein 214 [Source:HGNC Symbol;Acc:HGNC:25983]	TMEM214	2	27032910	27041695	1	protein_coding
ENSG00000167986	damage-specific DNA binding protein 1 [Source:HGNC Symbol;Acc:HGNC:2717]	DDB1	11	61299451	61342596	-1	protein_coding
ENSG00000115226	fibronectin type III domain containing 4 [Source:HGNC Symbol;Acc:HGNC:20239]	FNDC4	2	27491883	27495245	-1	protein_coding
ENSG00000186567	carcinoembryonic antigen-related cell adhesion molecule 19 [Source:HGNC Symbol;Acc:HGNC:31951]	CEACAM19	19	44662278	44684359	1	protein_coding
ENSG00000136206	speedy/RINGO cell cycle regulator family member E1 [Source:HGNC Symbol;Acc:HGNC:16408]	SPDYE1	7	44000889	44010122	1	protein_coding
ENSG00000171132	protein kinase C, epsilon [Source:HGNC Symbol;Acc:HGNC:9401]	PRKCE	2	45651345	46187990	1	protein_coding
ENSG00000213892	carcinoembryonic antigen-related cell adhesion molecule 16 [Source:HGNC Symbol;Acc:HGNC:31948]	CEACAM16	19	44699151	44710714	1	protein_coding
ENSG00000235314	long intergenic non-protein coding RNA 957 [Source:HGNC Symbol;Acc:HGNC:22332]	LINC00957	7	44039171	44042306	1	lincRNA
ENSG00000069399	B-cell CLL/lymphoma 3 [Source:HGNC Symbol;Acc:HGNC:998]	BCL3	19	44747705	44760044	1	protein_coding
ENSG00000136279	drebrin-like [Source:HGNC Symbol;Acc:HGNC:2696]	DBNL	7	44044640	44069456	1	protein_coding
ENSG00000142273	Cbl proto-oncogene C, E3 ubiquitin protein ligase [Source:HGNC Symbol;Acc:HGNC:15961]	CBLC	19	44777869	44800634	1	protein_coding
ENSG00000084734	glucokinase (hexokinase 4) regulator [Source:HGNC Symbol;Acc:HGNC:4196]	GCKR	2	27496842	27523684	1	protein_coding
ENSG00000090520	DnaJ heat shock protein family (Hsp40) member B11 [Source:HGNC Symbol;Acc:HGNC:14889]	DNAJB11	3	186567403	186597203	1	protein_coding
ENSG00000187244	basal cell adhesion molecule (Lutheran blood group) [Source:HGNC Symbol;Acc:HGNC:6722]	BCAM	19	44809059	44821420	1	protein_coding
ENSG00000145192	alpha-2-HS-glycoprotein [Source:HGNC Symbol;Acc:HGNC:349]	AHSG	3	186612923	186621318	1	protein_coding
ENSG00000232956	small nucleolar RNA host gene 15 [Source:HGNC Symbol;Acc:HGNC:27797]	SNHG15	7	44983023	44986961	-1	lincRNA
ENSG00000149476	triokinase/FMN cyclase [Source:HGNC Symbol;Acc:HGNC:24552]	TKFC	11	61333210	61353295	1	protein_coding
ENSG00000233438		AC109829.1	2	27537386	27567144	1	protein_coding
ENSG00000221843	chromosome 2 open reading frame 16 [Source:HGNC Symbol;Acc:HGNC:25275]	C2orf16	2	27576522	27582720	1	protein_coding
ENSG00000243943	zinc finger protein 512 [Source:HGNC Symbol;Acc:HGNC:29380]	ZNF512	2	27582969	27623215	1	protein_coding
ENSG00000084693	ATP/GTP binding protein-like 5 [Source:HGNC Symbol;Acc:HGNC:26147]	AGBL5	2	27042364	27070622	1	protein_coding
ENSG00000111666	choline phosphotransferase 1 [Source:HGNC Symbol;Acc:HGNC:17852]	CHPT1	12	101696947	101744140	1	protein_coding
ENSG00000162144	cytochrome b561 family member A3 [Source:HGNC Symbol;Acc:HGNC:23014]	CYB561A3	11	61348745	61362299	-1	protein_coding
ENSG00000130202	poliovirus receptor-related 2 (herpesvirus entry mediator B) [Source:HGNC Symbol;Acc:HGNC:9707]	PVRL2	19	44846175	44889228	1	protein_coding
ENSG00000069667	RAR-related orphan receptor A [Source:HGNC Symbol;Acc:HGNC:10258]	RORA	15	60488284	61229319	-1	protein_coding
ENSG00000130204	translocase of outer mitochondrial membrane 40 homolog (yeast) [Source:HGNC Symbol;Acc:HGNC:18001]	TOMM40	19	44890569	44903689	1	protein_coding
ENSG00000090512	fetuin B [Source:HGNC Symbol;Acc:HGNC:3658]	FETUB	3	186635969	186653141	1	protein_coding
ENSG00000149483	transmembrane protein 138 [Source:HGNC Symbol;Acc:HGNC:26944]	TMEM138	11	61362001	61369509	1	protein_coding
ENSG00000130203	apolipoprotein E [Source:HGNC Symbol;Acc:HGNC:613]	APOE	19	44905754	44909393	1	protein_coding
ENSG00000130208	apolipoprotein C-I [Source:HGNC Symbol;Acc:HGNC:607]	APOC1	19	44914247	44919349	1	protein_coding
ENSG00000187049	transmembrane protein 216 [Source:HGNC Symbol;Acc:HGNC:25018]	TMEM216	11	61391687	61398863	1	protein_coding
ENSG00000173890	G protein-coupled receptor 160 [Source:HGNC Symbol;Acc:HGNC:23693]	GPR160	3	170037929	170085403	1	protein_coding
ENSG00000224916	APOC4-APOC2 readthrough (NMD candidate) [Source:HGNC Symbol;Acc:HGNC:44426]	APOC4-APOC2	19	44942238	44949565	1	protein_coding
ENSG00000267467	apolipoprotein C-IV [Source:HGNC Symbol;Acc:HGNC:611]	APOC4	19	44942238	44945496	1	protein_coding
ENSG00000234906	apolipoprotein C-II [Source:HGNC Symbol;Acc:HGNC:609]	APOC2	19	44946035	44949565	1	protein_coding
ENSG00000129003	vacuolar protein sorting 13 homolog C (S. cerevisiae) [Source:HGNC Symbol;Acc:HGNC:23594]	VPS13C	15	61852389	62060473	-1	protein_coding
ENSG00000267114		CTB-129P6.11	19	44950044	44954007	-1	lincRNA
ENSG00000149532	cleavage and polyadenylation specific factor 7 [Source:HGNC Symbol;Acc:HGNC:30098]	CPSF7	11	61402641	61430031	-1	protein_coding
ENSG00000104853	cleft lip and palate associated transmembrane protein 1 [Source:HGNC Symbol;Acc:HGNC:2087]	CLPTM1	19	44954585	44993341	1	protein_coding
ENSG00000139714	MORN repeat containing 3 [Source:HGNC Symbol;Acc:HGNC:29807]	MORN3	12	121648742	121672631	-1	protein_coding
ENSG00000164708	phosphoglycerate mutase 2 [Source:HGNC Symbol;Acc:HGNC:8889]	PGAM2	7	44062727	44065587	-1	protein_coding
ENSG00000228474	oligosaccharyltransferase complex subunit 4 (non-catalytic) [Source:HGNC Symbol;Acc:HGNC:32483]	OST4	2	27070472	27071773	-1	protein_coding
ENSG00000122678	polymerase (DNA directed), mu [Source:HGNC Symbol;Acc:HGNC:9185]	POLM	7	44072247	44082540	-1	protein_coding
ENSG00000173889	polyhomeotic homolog 3 (Drosophila) [Source:HGNC Symbol;Acc:HGNC:15682]	PHC3	3	170086732	170181749	-1	protein_coding
ENSG00000188735	transmembrane protein 120B [Source:HGNC Symbol;Acc:HGNC:32008]	TMEM120B	12	121712752	121783001	1	protein_coding
ENSG00000176714	coiled-coil domain containing 121 [Source:HGNC Symbol;Acc:HGNC:25833]	CCDC121	2	27625639	27629012	-1	protein_coding
ENSG00000104856	v-rel avian reticuloendotheliosis viral oncogene homolog B [Source:HGNC Symbol;Acc:HGNC:9956]	RELB	19	45001430	45038198	1	protein_coding
ENSG00000139725	ras homolog family member F (in filopodia) [Source:HGNC Symbol;Acc:HGNC:15703]	RHOF	12	121777754	121803403	-1	protein_coding
ENSG00000198522	GPN-loop GTPase 1 [Source:HGNC Symbol;Acc:HGNC:17030]	GPN1	2	27628247	27651508	1	protein_coding
ENSG00000113905	histidine-rich glycoprotein [Source:HGNC Symbol;Acc:HGNC:5181]	HRG	3	186660216	186678240	1	protein_coding
ENSG00000256591		RP11-286N22.8	11	61429220	61485822	1	protein_coding
ENSG00000167985	succinate dehydrogenase complex assembly factor 2 [Source:HGNC Symbol;Acc:HGNC:26034]	SDHAF2	11	61430042	61447529	1	protein_coding
ENSG00000138080	elastin microfibril interfacer 1 [Source:HGNC Symbol;Acc:HGNC:19880]	EMILIN1	2	27078567	27086408	1	protein_coding
ENSG00000113889	kininogen 1 [Source:HGNC Symbol;Acc:HGNC:6383]	KNG1	3	186717276	186743954	1	protein_coding
ENSG00000104859	CLK4-associating serine/arginine rich protein [Source:HGNC Symbol;Acc:HGNC:17731]	CLASRP	19	45039040	45070956	1	protein_coding
ENSG00000143494	vasohibin 2 [Source:HGNC Symbol;Acc:HGNC:25723]	VASH2	1	212950520	212992037	1	protein_coding
ENSG00000231681		AC020743.3	7	50202239	50204318	-1	lincRNA
ENSG00000235620		AC020743.4	7	50274790	50275622	-1	lincRNA
ENSG00000138030	ketohexokinase [Source:HGNC Symbol;Acc:HGNC:6315]	KHK	2	27086747	27100772	1	protein_coding
ENSG00000139351	synaptonemal complex protein 3 [Source:HGNC Symbol;Acc:HGNC:18130]	SYCP3	12	101728648	101739472	-1	protein_coding
ENSG00000139718	SET domain containing 1B [Source:HGNC Symbol;Acc:HGNC:29187]	SETD1B	12	121804180	121832584	1	protein_coding
ENSG00000162148	protein phosphatase 1 regulatory subunit 32 [Source:HGNC Symbol;Acc:HGNC:28869]	PPP1R32	11	61481120	61490931	1	protein_coding
ENSG00000174606	angel homolog 2 (Drosophila) [Source:HGNC Symbol;Acc:HGNC:30534]	ANGEL2	1	212992182	213015826	-1	protein_coding
ENSG00000204950	leucine rich repeat containing 10B [Source:HGNC Symbol;Acc:HGNC:37215]	LRRC10B	11	61508800	61511018	1	protein_coding
ENSG00000106624	AE binding protein 1 [Source:HGNC Symbol;Acc:HGNC:303]	AEBP1	7	44104361	44114562	1	protein_coding
ENSG00000011347	synaptotagmin 7 [Source:HGNC Symbol;Acc:HGNC:11514]	SYT7	11	61515313	61581148	-1	protein_coding
ENSG00000136643	ribosomal protein S6 kinase, 52kDa, polypeptide 1 [Source:HGNC Symbol;Acc:HGNC:10439]	RPS6KC1	1	213051233	213274773	1	protein_coding
ENSG00000134780	diacylglycerol lipase, alpha [Source:HGNC Symbol;Acc:HGNC:1165]	DAGLA	11	61680433	61747001	1	protein_coding
ENSG00000236046		AC004920.3	7	50839363	50841992	-1	lincRNA
ENSG00000170684	zinc finger protein 296 [Source:HGNC Symbol;Acc:HGNC:15981]	ZNF296	19	45071500	45076588	-1	protein_coding
ENSG00000111670	N-acetylglucosamine-1-phosphate transferase, alpha and beta subunits [Source:HGNC Symbol;Acc:HGNC:29670]	GNPTAB	12	101745497	101830938	-1	protein_coding
ENSG00000142252	gem nuclear organelle associated protein 7 [Source:HGNC Symbol;Acc:HGNC:20045]	GEMIN7	19	45079195	45091524	1	protein_coding
ENSG00000229403		RP4-718N17.2	7	51614251	51630870	1	lincRNA
ENSG00000158104	4-hydroxyphenylpyruvate dioxygenase [Source:HGNC Symbol;Acc:HGNC:5147]	HPD	12	121839527	121863596	-1	protein_coding
ENSG00000153113	calpastatin [Source:HGNC Symbol;Acc:HGNC:1515]	CAST	5	96525267	96779595	1	protein_coding
ENSG00000117707	prospero homeobox 1 [Source:HGNC Symbol;Acc:HGNC:9459]	PROX1	1	213983181	214041502	1	protein_coding
ENSG00000007047	MAP/microtubule affinity-regulating kinase 4 [Source:HGNC Symbol;Acc:HGNC:13538]	MARK4	19	45079288	45305283	1	protein_coding
ENSG00000138028	cell growth regulator with EF-hand domain 1 [Source:HGNC Symbol;Acc:HGNC:16962]	CGREF1	2	27098889	27119115	-1	protein_coding
ENSG00000143499	SET and MYND domain containing 2 [Source:HGNC Symbol;Acc:HGNC:20982]	SMYD2	1	214281102	214337131	1	protein_coding
ENSG00000124920	myelin regulatory factor [Source:HGNC Symbol;Acc:HGNC:1181]	MYRF	11	61752642	61788518	1	protein_coding
ENSG00000198535	C2 calcium-dependent domain containing 4A [Source:HGNC Symbol;Acc:HGNC:33627]	C2CD4A	15	62066977	62070917	1	protein_coding
ENSG00000205502	C2 calcium-dependent domain containing 4B [Source:HGNC Symbol;Acc:HGNC:33628]	C2CD4B	15	62163535	62165283	-1	protein_coding
ENSG00000119760	SPT7-like STAGA complex gamma subunit [Source:HGNC Symbol;Acc:HGNC:30632]	SUPT7L	2	27650812	27663840	-1	protein_coding
ENSG00000163558	protein kinase C, iota [Source:HGNC Symbol;Acc:HGNC:9404]	PRKCI	3	170222365	170305981	1	protein_coding
ENSG00000171914	talin 2 [Source:HGNC Symbol;Acc:HGNC:15447]	TLN2	15	62390526	62844631	1	protein_coding
ENSG00000152104	protein tyrosine phosphatase, non-receptor type 14 [Source:HGNC Symbol;Acc:HGNC:9647]	PTPN14	1	214348696	214552449	-1	protein_coding
ENSG00000163798	solute carrier family 4 (anion exchanger), member 1, adaptor protein [Source:HGNC Symbol;Acc:HGNC:13813]	SLC4A1AP	2	27663471	27694976	1	protein_coding
ENSG00000106628	polymerase (DNA directed), delta 2, accessory subunit [Source:HGNC Symbol;Acc:HGNC:9176]	POLD2	7	44114681	44124358	-1	protein_coding
ENSG00000143994	abhydrolase domain containing 1 [Source:HGNC Symbol;Acc:HGNC:17553]	ABHD1	2	27123789	27130812	1	protein_coding
ENSG00000134825	transmembrane protein 258 [Source:HGNC Symbol;Acc:HGNC:1164]	TMEM258	11	61768501	61792802	-1	protein_coding
ENSG00000104866	protein phosphatase 1 regulatory subunit 37 [Source:HGNC Symbol;Acc:HGNC:27607]	PPP1R37	19	45091396	45148077	1	protein_coding
ENSG00000168496	flap structure-specific endonuclease 1 [Source:HGNC Symbol;Acc:HGNC:3650]	FEN1	11	61792637	61797244	1	protein_coding
ENSG00000117724	centromere protein F [Source:HGNC Symbol;Acc:HGNC:1857]	CENPF	1	214603195	214664588	1	protein_coding
ENSG00000156976	eukaryotic translation initiation factor 4A2 [Source:HGNC Symbol;Acc:HGNC:3284]	EIF4A2	3	186783205	186789900	1	protein_coding
ENSG00000179846	NTPase, KAP family P-loop domain containing 1 [Source:HGNC Symbol;Acc:HGNC:24739]	NKPD1	19	45149750	45160150	-1	protein_coding
ENSG00000007255	trafficking protein particle complex 6A [Source:HGNC Symbol;Acc:HGNC:23069]	TRAPPC6A	19	45162928	45178237	-1	protein_coding
ENSG00000134824	fatty acid desaturase 2 [Source:HGNC Symbol;Acc:HGNC:3575]	FADS2	11	61792980	61867354	1	protein_coding
ENSG00000110801	proteasome 26S subunit, non-ATPase 9 [Source:HGNC Symbol;Acc:HGNC:9567]	PSMD9	12	121888731	121918297	1	protein_coding
ENSG00000189114	biogenesis of lysosomal organelles complex-1, subunit 3 [Source:HGNC Symbol;Acc:HGNC:20914]	BLOC1S3	19	45178745	45181801	1	protein_coding
ENSG00000267545		AC005779.2	19	45179822	45202444	1	protein_coding
ENSG00000130201	exocyst complex component 3-like 2 [Source:HGNC Symbol;Acc:HGNC:30162]	EXOC3L2	19	45212621	45234211	-1	protein_coding
ENSG00000232470		RP11-313D6.3	10	110869743	110871594	1	lincRNA
ENSG00000104879	creatine kinase, muscle [Source:HGNC Symbol;Acc:HGNC:1994]	CKM	19	45306414	45322977	-1	protein_coding
ENSG00000205334	long intergenic non-protein coding RNA 1460 [Source:HGNC Symbol;Acc:HGNC:50858]	LINC01460	2	27705786	27715732	-1	lincRNA
ENSG00000227851		RP11-381K7.1	10	111349939	111352103	-1	lincRNA
ENSG00000243147	mitochondrial ribosomal protein L33 [Source:HGNC Symbol;Acc:HGNC:14487]	MRPL33	2	27771717	27988087	1	protein_coding
ENSG00000256950		RP11-87C12.2	12	121888809	121921470	1	protein_coding
ENSG00000171174	ribokinase [Source:HGNC Symbol;Acc:HGNC:30325]	RBKS	2	27781364	27891098	-1	protein_coding
ENSG00000104892	kinesin light chain 3 [Source:HGNC Symbol;Acc:HGNC:20717]	KLC3	19	45333434	45351520	1	protein_coding
ENSG00000149485	fatty acid desaturase 1 [Source:HGNC Symbol;Acc:HGNC:3574]	FADS1	11	61799625	61829318	-1	protein_coding
ENSG00000158023	WD repeat domain 66 [Source:HGNC Symbol;Acc:HGNC:28506]	WDR66	12	121917862	122003927	1	protein_coding
ENSG00000104884	excision repair cross-complementation group 2 [Source:HGNC Symbol;Acc:HGNC:3434]	ERCC2	19	45349837	45370918	-1	protein_coding
ENSG00000106631	myosin light chain 7 [Source:HGNC Symbol;Acc:HGNC:21719]	MYL7	7	44138864	44141332	-1	protein_coding
ENSG00000221968	fatty acid desaturase 3 [Source:HGNC Symbol;Acc:HGNC:3576]	FADS3	11	61873519	61892051	-1	protein_coding
ENSG00000104881	protein phosphatase 1 regulatory subunit 13 like [Source:HGNC Symbol;Acc:HGNC:18838]	PPP1R13L	19	45379634	45406349	-1	protein_coding
ENSG00000110987	B-cell CLL/lymphoma 7A [Source:HGNC Symbol;Acc:HGNC:1004]	BCL7A	12	122019422	122062044	1	protein_coding
ENSG00000106633	glucokinase (hexokinase 4) [Source:HGNC Symbol;Acc:HGNC:4195]	GCK	7	44144271	44198170	-1	protein_coding
ENSG00000138073	prolactin regulatory element binding [Source:HGNC Symbol;Acc:HGNC:9356]	PREB	2	27130756	27134675	-1	protein_coding
ENSG00000117877	CD3e molecule, epsilon associated protein [Source:HGNC Symbol;Acc:HGNC:24219]	CD3EAP	19	45406209	45410766	1	protein_coding
ENSG00000167994	RAB3A interacting protein (rabin3)-like 1 [Source:HGNC Symbol;Acc:HGNC:9780]	RAB3IL1	11	61897301	61920269	-1	protein_coding
ENSG00000158019	brain and reproductive organ-expressed (TNFRSF1A modulator) [Source:HGNC Symbol;Acc:HGNC:1106]	BRE	2	27889941	28338901	1	protein_coding
ENSG00000170743	synaptotagmin 9 [Source:HGNC Symbol;Acc:HGNC:19265]	SYT9	11	7238778	7469042	1	protein_coding
ENSG00000175727	MLX interacting protein [Source:HGNC Symbol;Acc:HGNC:17055]	MLXIP	12	122078722	122147347	1	protein_coding
ENSG00000167995	bestrophin 1 [Source:HGNC Symbol;Acc:HGNC:12703]	BEST1	11	61949821	61965515	1	protein_coding
ENSG00000136603	SKI-like proto-oncogene [Source:HGNC Symbol;Acc:HGNC:10897]	SKIL	3	170357678	170396835	1	protein_coding
ENSG00000012061	excision repair cross-complementation group 1 [Source:HGNC Symbol;Acc:HGNC:3433]	ERCC1	19	45407333	45478828	-1	protein_coding
ENSG00000106636	YKT6 v-SNARE homolog (S. cerevisiae) [Source:HGNC Symbol;Acc:HGNC:16959]	YKT6	7	44200968	44214294	1	protein_coding
ENSG00000183801	olfactomedin like 1 [Source:HGNC Symbol;Acc:HGNC:24473]	OLFML1	11	7485388	7511377	1	protein_coding
ENSG00000013297	claudin 11 [Source:HGNC Symbol;Acc:HGNC:8514]	CLDN11	3	170418865	170860380	1	protein_coding
ENSG00000166387	PTPRF interacting protein, binding protein 2 (liprin beta 2) [Source:HGNC Symbol;Acc:HGNC:9250]	PPFIBP2	11	7513298	7657127	1	protein_coding
ENSG00000167996	ferritin, heavy polypeptide 1 [Source:HGNC Symbol;Acc:HGNC:3976]	FTH1	11	61959718	61967660	-1	protein_coding
ENSG00000149503	inner centromere protein [Source:HGNC Symbol;Acc:HGNC:6058]	INCENP	11	62123973	62153163	1	protein_coding
ENSG00000125740	FBJ murine osteosarcoma viral oncogene homolog B [Source:HGNC Symbol;Acc:HGNC:3797]	FOSB	19	45467995	45475179	1	protein_coding
ENSG00000125744	reticulon 2 [Source:HGNC Symbol;Acc:HGNC:10468]	RTN2	19	45485289	45497061	-1	protein_coding
ENSG00000013293	solute carrier family 7 member 14 [Source:HGNC Symbol;Acc:HGNC:29326]	SLC7A14	3	170459584	170586074	-1	protein_coding
ENSG00000186143	proline rich 30 [Source:HGNC Symbol;Acc:HGNC:28677]	PRR30	2	27136848	27139410	-1	protein_coding
ENSG00000168515	secretoglobin, family 1D, member 1 [Source:HGNC Symbol;Acc:HGNC:18395]	SCGB1D1	11	62190216	62193539	1	protein_coding
ENSG00000124939	secretoglobin, family 2A, member 1 [Source:HGNC Symbol;Acc:HGNC:7051]	SCGB2A1	11	62208668	62213939	1	protein_coding
ENSG00000163792	transcription factor 23 [Source:HGNC Symbol;Acc:HGNC:18602]	TCF23	2	27149004	27156974	1	protein_coding
ENSG00000124935	secretoglobin, family 1D, member 2 [Source:HGNC Symbol;Acc:HGNC:18396]	SCGB1D2	11	62242210	62244808	1	protein_coding
ENSG00000110484	secretoglobin, family 2A, member 2 [Source:HGNC Symbol;Acc:HGNC:7050]	SCGB2A2	11	62270155	62273156	1	protein_coding
ENSG00000138074	solute carrier family 5 (sodium/multivitamin and iodide cotransporter), member 6 [Source:HGNC Symbol;Acc:HGNC:11041]	SLC5A6	2	27199587	27212958	-1	protein_coding
ENSG00000075426	FOS-like antigen 2 [Source:HGNC Symbol;Acc:HGNC:3798]	FOSL2	2	28392448	28417312	1	protein_coding
ENSG00000197745	secretoglobin, family 1D, member 4 [Source:HGNC Symbol;Acc:HGNC:31748]	SCGB1D4	11	62296277	62299064	-1	protein_coding
ENSG00000166394	cytochrome b5 reductase 2 [Source:HGNC Symbol;Acc:HGNC:24376]	CYB5R2	11	7665100	7677222	-1	protein_coding
ENSG00000162174	asparaginase like 1 [Source:HGNC Symbol;Acc:HGNC:16448]	ASRGL1	11	62337448	62393412	1	protein_coding
ENSG00000158113	leucine rich repeat containing 43 [Source:HGNC Symbol;Acc:HGNC:28562]	LRRC43	12	122167738	122203471	1	protein_coding
ENSG00000213889	protein phosphatase, Mg2+/Mn2+ dependent 1N (putative) [Source:HGNC Symbol;Acc:HGNC:26845]	PPM1N	19	45488777	45502510	1	protein_coding
ENSG00000058404	calcium/calmodulin-dependent protein kinase II beta [Source:HGNC Symbol;Acc:HGNC:1461]	CAMK2B	7	44217150	44334577	-1	protein_coding
ENSG00000163584	ribosomal protein L22 like 1 [Source:HGNC Symbol;Acc:HGNC:27610]	RPL22L1	3	170864875	170870483	-1	protein_coding
ENSG00000163803	phospholipase B1 [Source:HGNC Symbol;Acc:HGNC:30041]	PLB1	2	28457145	28643788	1	protein_coding
ENSG00000149021	secretoglobin, family 1A, member 1 (uteroglobin) [Source:HGNC Symbol;Acc:HGNC:12523]	SCGB1A1	11	62405103	62423195	1	protein_coding
ENSG00000125753	vasodilator-stimulated phosphoprotein [Source:HGNC Symbol;Acc:HGNC:12652]	VASP	19	45506579	45526983	1	protein_coding
ENSG00000163577	eukaryotic translation initiation factor 5A2 [Source:HGNC Symbol;Acc:HGNC:3301]	EIF5A2	3	170888415	170908693	-1	protein_coding
ENSG00000124942	AHNAK nucleoprotein [Source:HGNC Symbol;Acc:HGNC:347]	AHNAK	11	62433542	62556235	-1	protein_coding
ENSG00000183303	olfactory receptor family 5 subfamily P member 2 [Source:HGNC Symbol;Acc:HGNC:14783]	OR5P2	11	7795905	7796973	-1	protein_coding
ENSG00000182334	olfactory receptor family 5 subfamily P member 3 [Source:HGNC Symbol;Acc:HGNC:14784]	OR5P3	11	7825037	7825972	-1	protein_coding
ENSG00000175393	olfactory receptor family 10 subfamily A member 6 (gene/pseudogene) [Source:HGNC Symbol;Acc:HGNC:15132]	OR10A6	11	7927718	7928662	-1	protein_coding
ENSG00000170683	olfactory receptor family 10 subfamily A member 3 [Source:HGNC Symbol;Acc:HGNC:8162]	OR10A3	11	7938534	7939594	-1	protein_coding
ENSG00000182261	NLR family, pyrin domain containing 10 [Source:HGNC Symbol;Acc:HGNC:21464]	NLRP10	11	7959424	7965426	-1	protein_coding
ENSG00000163581	solute carrier family 2 (facilitated glucose transporter), member 2 [Source:HGNC Symbol;Acc:HGNC:11006]	SLC2A2	3	170996348	171026750	-1	protein_coding
ENSG00000175390	eukaryotic translation initiation factor 3 subunit F [Source:HGNC Symbol;Acc:HGNC:3275]	EIF3F	11	7970251	8001862	1	protein_coding
ENSG00000125741	optic atrophy 3 (autosomal recessive, with chorea and spastic paraplegia) [Source:HGNC Symbol;Acc:HGNC:8142]	OPA3	19	45527427	45602212	-1	protein_coding
ENSG00000136048	DNA damage regulated autophagy modulator 1 [Source:HGNC Symbol;Acc:HGNC:25645]	DRAM1	12	101877351	102012130	1	protein_coding
ENSG00000177464	G protein-coupled receptor 4 [Source:HGNC Symbol;Acc:HGNC:4497]	GPR4	19	45589764	45602208	-1	protein_coding
ENSG00000204671	interleukin 31 [Source:HGNC Symbol;Acc:HGNC:19372]	IL31	12	122172030	122174199	-1	protein_coding
ENSG00000176383	UDP-GlcNAc:betaGal beta-1,3-N-acetylglucosaminyltransferase 4 [Source:HGNC Symbol;Acc:HGNC:15683]	B3GNT4	12	122203543	122208952	1	protein_coding
ENSG00000166402	tubby bipartite transcription factor [Source:HGNC Symbol;Acc:HGNC:12406]	TUB	11	8019244	8106112	1	protein_coding
ENSG00000254772	eukaryotic translation elongation factor 1 gamma [Source:HGNC Symbol;Acc:HGNC:3213]	EEF1G	11	62559601	62574086	-1	protein_coding
ENSG00000120860	coiled-coil domain containing 53 [Source:HGNC Symbol;Acc:HGNC:24256]	CCDC53	12	102012927	102062149	-1	protein_coding
ENSG00000125746	echinoderm microtubule associated protein like 2 [Source:HGNC Symbol;Acc:HGNC:18035]	EML2	19	45606994	45645629	-1	protein_coding
ENSG00000184047	diablo, IAP-binding mitochondrial protein [Source:HGNC Symbol;Acc:HGNC:21528]	DIABLO	12	122207662	122227534	-1	protein_coding
ENSG00000255508		RP11-864I4.1	11	62559603	62591531	-1	protein_coding
ENSG00000166405	RIC3 acetylcholine receptor chaperone [Source:HGNC Symbol;Acc:HGNC:30338]	RIC3	11	8106093	8169055	-1	protein_coding
ENSG00000149016	terminal uridylyl transferase 1, U6 snRNA-specific [Source:HGNC Symbol;Acc:HGNC:26184]	TUT1	11	62575045	62592177	-1	protein_coding
ENSG00000166407	LIM domain only 1 [Source:HGNC Symbol;Acc:HGNC:6641]	LMO1	11	8224304	8268716	-1	protein_coding
ENSG00000149480	metastasis associated 1 family member 2 [Source:HGNC Symbol;Acc:HGNC:7411]	MTA2	11	62593214	62601840	-1	protein_coding
ENSG00000130413	serine/threonine kinase 33 [Source:HGNC Symbol;Acc:HGNC:14568]	STK33	11	8391868	8594289	-1	protein_coding
ENSG00000154310	TRAF2 and NCK interacting kinase [Source:HGNC Symbol;Acc:HGNC:30765]	TNIK	3	171061339	171460408	-1	protein_coding
ENSG00000075188	nucleoporin 37kDa [Source:HGNC Symbol;Acc:HGNC:29929]	NUP37	12	102073103	102120124	-1	protein_coding
ENSG00000010310	gastric inhibitory polypeptide receptor [Source:HGNC Symbol;Acc:HGNC:4271]	GIPR	19	45668244	45683724	1	protein_coding
ENSG00000166436	tripartite motif containing 66 [Source:HGNC Symbol;Acc:HGNC:29005]	TRIM66	11	8612037	8671866	-1	protein_coding
ENSG00000256861		RP11-512M8.5	12	122207779	122266423	-1	protein_coding
ENSG00000149499	echinoderm microtubule associated protein like 3 [Source:HGNC Symbol;Acc:HGNC:26666]	EML3	11	62602218	62612765	-1	protein_coding
ENSG00000125743	small nuclear ribonucleoprotein D2 polypeptide [Source:HGNC Symbol;Acc:HGNC:11159]	SNRPD2	19	45687454	45692569	-1	protein_coding
ENSG00000139719	VPS33A, CORVET/HOPS core subunit [Source:HGNC Symbol;Acc:HGNC:18179]	VPS33A	12	122229564	122266521	-1	protein_coding
ENSG00000011478	glutaminyl-peptide cyclotransferase-like [Source:HGNC Symbol;Acc:HGNC:25952]	QPCTL	19	45692483	45703989	1	protein_coding
ENSG00000166441	ribosomal protein L27a [Source:HGNC Symbol;Acc:HGNC:10329]	RPL27A	11	8682411	8714759	1	protein_coding
ENSG00000177051	F-box protein 46 [Source:HGNC Symbol;Acc:HGNC:25069]	FBXO46	19	45710629	45730904	-1	protein_coding
ENSG00000237452	basic helix-loop-helix and HMG box domain containing 1 [Source:HGNC Symbol;Acc:HGNC:44318]	BHMG1	19	45733251	45764534	1	protein_coding
ENSG00000177045	SIX homeobox 5 [Source:HGNC Symbol;Acc:HGNC:10891]	SIX5	19	45764785	45769226	-1	protein_coding
ENSG00000138085	all-trans retinoic acid induced differentiation factor [Source:HGNC Symbol;Acc:HGNC:24090]	ATRAID	2	27212027	27217178	1	protein_coding
ENSG00000163918	replication factor C subunit 4 [Source:HGNC Symbol;Acc:HGNC:9972]	RFC4	3	186789880	186807058	-1	protein_coding
ENSG00000104936	dystrophia myotonica protein kinase [Source:HGNC Symbol;Acc:HGNC:2933]	DMPK	19	45769717	45782552	-1	protein_coding
ENSG00000149489	retinal outer segment membrane protein 1 [Source:HGNC Symbol;Acc:HGNC:10254]	ROM1	11	62611722	62615120	1	protein_coding
ENSG00000130779	CAP-Gly domain containing linker protein 1 [Source:HGNC Symbol;Acc:HGNC:10461]	CLIP1	12	122271432	122422632	-1	protein_coding
ENSG00000149541	beta-1,3-glucuronyltransferase 3 [Source:HGNC Symbol;Acc:HGNC:923]	B3GAT3	11	62615296	62622175	-1	protein_coding
ENSG00000185480	PARP1 binding protein [Source:HGNC Symbol;Acc:HGNC:26074]	PARPBP	12	102120185	102197520	1	protein_coding
ENSG00000084774	carbamoyl-phosphate synthetase 2, aspartate transcarbamylase, and dihydroorotase [Source:HGNC Symbol;Acc:HGNC:1424]	CAD	2	27217390	27243943	1	protein_coding
ENSG00000089597	glucosidase, alpha; neutral AB [Source:HGNC Symbol;Acc:HGNC:4138]	GANAB	11	62624826	62646726	-1	protein_coding
ENSG00000166444	suppression of tumorigenicity 5 [Source:HGNC Symbol;Acc:HGNC:11350]	ST5	11	8693351	8910951	-1	protein_coding
ENSG00000015676	NudC domain containing 3 [Source:HGNC Symbol;Acc:HGNC:22208]	NUDCD3	7	44379121	44490880	-1	protein_coding
ENSG00000268434		AC011530.4	19	45779437	45785973	-1	protein_coding
ENSG00000185800	dystrophia myotonica, WD repeat containing [Source:HGNC Symbol;Acc:HGNC:2936]	DMWD	19	45782947	45792802	-1	protein_coding
ENSG00000104941	radial spoke head 6 homolog A (Chlamydomonas) [Source:HGNC Symbol;Acc:HGNC:14241]	RSPH6A	19	45795710	45815319	-1	protein_coding
ENSG00000125755	symplekin [Source:HGNC Symbol;Acc:HGNC:22935]	SYMPK	19	45815410	45863290	-1	protein_coding
ENSG00000185085	integrator complex subunit 5 [Source:HGNC Symbol;Acc:HGNC:29352]	INTS5	11	62646848	62653302	-1	protein_coding
ENSG00000255432		RP11-831H9.11	11	62649694	62665178	-1	protein_coding
ENSG00000162194	LBH domain containing 1 [Source:HGNC Symbol;Acc:HGNC:28351]	LBHD1	11	62662817	62672255	-1	protein_coding
ENSG00000115194	solute carrier family 30 (zinc transporter), member 3 [Source:HGNC Symbol;Acc:HGNC:11014]	SLC30A3	2	27253684	27275817	-1	protein_coding
ENSG00000214756	methyltransferase like 12 [Source:HGNC Symbol;Acc:HGNC:33113]	METTL12	11	62665309	62668496	1	protein_coding
ENSG00000166452	A-kinase interacting protein 1 [Source:HGNC Symbol;Acc:HGNC:1170]	AKIP1	11	8911139	8920084	1	protein_coding
ENSG00000204922	ubiquinol-cytochrome c reductase complex assembly factor 3 [Source:HGNC Symbol;Acc:HGNC:34399]	UQCC3	11	62670273	62673687	1	protein_coding
ENSG00000162191	UBX domain protein 1 [Source:HGNC Symbol;Acc:HGNC:18402]	UBXN1	11	62676498	62679117	-1	protein_coding
ENSG00000176029	chromosome 11 open reading frame 16 [Source:HGNC Symbol;Acc:HGNC:1169]	C11orf16	11	8920076	8933006	-1	protein_coding
ENSG00000170608	forkhead box A3 [Source:HGNC Symbol;Acc:HGNC:5023]	FOXA3	19	45863989	45873797	1	protein_coding
ENSG00000170604	interferon regulatory factor 2 binding protein 1 [Source:HGNC Symbol;Acc:HGNC:21728]	IRF2BP1	19	45883607	45886170	-1	protein_coding
ENSG00000176182	Myb-related transcription factor, partner of profilin [Source:HGNC Symbol;Acc:HGNC:20178]	MYPOP	19	45890020	45902604	-1	protein_coding
ENSG00000188425	nanos homolog 2 (Drosophila) [Source:HGNC Symbol;Acc:HGNC:23292]	NANOS2	19	45913214	45914870	-1	protein_coding
ENSG00000104967	neuro-oncological ventral antigen 2 [Source:HGNC Symbol;Acc:HGNC:7887]	NOVA2	19	45933734	45973546	-1	protein_coding
ENSG00000162437	ribonucleoprotein, PTB-binding 2 [Source:HGNC Symbol;Acc:HGNC:25577]	RAVER2	1	64745095	64833232	1	protein_coding
ENSG00000164307	endoplasmic reticulum aminopeptidase 1 [Source:HGNC Symbol;Acc:HGNC:18173]	ERAP1	5	96760810	96808100	-1	protein_coding
ENSG00000176009	achaete-scute family bHLH transcription factor 3 [Source:HGNC Symbol;Acc:HGNC:740]	ASCL3	11	8937579	8938211	-1	protein_coding
ENSG00000162434	Janus kinase 1 [Source:HGNC Symbol;Acc:HGNC:6190]	JAK1	1	64833229	64966504	-1	protein_coding
ENSG00000177363	LRRN4 C-terminal like [Source:HGNC Symbol;Acc:HGNC:33724]	LRRN4CL	11	62686402	62689899	-1	protein_coding
ENSG00000234857	HNRNPUL2-BSCL2 readthrough (NMD candidate) [Source:HGNC Symbol;Acc:HGNC:49189]	HNRNPUL2-BSCL2	11	62690275	62727384	-1	protein_coding
ENSG00000162433	adenylate kinase 4 [Source:HGNC Symbol;Acc:HGNC:363]	AK4	1	65147549	65232145	1	protein_coding
ENSG00000168000	Berardinelli-Seip congenital lipodystrophy 2 (seipin) [Source:HGNC Symbol;Acc:HGNC:15832]	BSCL2	11	62690275	62709845	-1	protein_coding
ENSG00000116675	DnaJ heat shock protein family (Hsp40) member C6 [Source:HGNC Symbol;Acc:HGNC:15469]	DNAJC6	1	65248219	65415869	1	protein_coding
ENSG00000033030	zinc finger, CCHC domain containing 8 [Source:HGNC Symbol;Acc:HGNC:25265]	ZCCHC8	12	122471600	122501073	-1	protein_coding
ENSG00000015520	NPC1-like 1 [Source:HGNC Symbol;Acc:HGNC:7898]	NPC1L1	7	44512535	44541315	-1	protein_coding
ENSG00000116678	leptin receptor [Source:HGNC Symbol;Acc:HGNC:6554]	LEPR	1	65420652	65641559	1	protein_coding
ENSG00000183395	pro-melanin concentrating hormone [Source:HGNC Symbol;Acc:HGNC:9109]	PMCH	12	102196459	102197845	-1	protein_coding
ENSG00000213625	leptin receptor overlapping transcript [Source:HGNC Symbol;Acc:HGNC:29477]	LEPROT	1	65420587	65436007	1	protein_coding
ENSG00000184588	phosphodiesterase 4B [Source:HGNC Symbol;Acc:HGNC:8781]	PDE4B	1	65792514	66374579	1	protein_coding
ENSG00000162188	guanine nucleotide binding protein (G protein), gamma 3 [Source:HGNC Symbol;Acc:HGNC:4405]	GNG3	11	62707658	62709201	1	protein_coding
ENSG00000214753	heterogeneous nuclear ribonucleoprotein U-like 2 [Source:HGNC Symbol;Acc:HGNC:25451]	HNRNPUL2	11	62712630	62727349	-1	protein_coding
ENSG00000136271	DEAD (Asp-Glu-Ala-Asp) box helicase 56 [Source:HGNC Symbol;Acc:HGNC:18193]	DDX56	7	44565417	44575051	-1	protein_coding
ENSG00000162222	tetratricopeptide repeat domain 9C [Source:HGNC Symbol;Acc:HGNC:28432]	TTC9C	11	62728069	62740293	1	protein_coding
ENSG00000185670	zinc finger and BTB domain containing 3 [Source:HGNC Symbol;Acc:HGNC:22918]	ZBTB3	11	62748319	62754188	-1	protein_coding
ENSG00000164109	MAD2 mitotic arrest deficient-like 1 (yeast) [Source:HGNC Symbol;Acc:HGNC:6763]	MAD2L1	4	120055608	120067074	-1	protein_coding
ENSG00000168002	polymerase (RNA) II (DNA directed) polypeptide G [Source:HGNC Symbol;Acc:HGNC:9194]	POLR2G	11	62761544	62766710	1	protein_coding
ENSG00000162227	TATA-box binding protein associated factor 6 like [Source:HGNC Symbol;Acc:HGNC:17305]	TAF6L	11	62771303	62787342	1	protein_coding
ENSG00000118473	SH3-domain GRB2-like (endophilin) interacting protein 1 [Source:HGNC Symbol;Acc:HGNC:25412]	SGIP1	1	66533383	66748299	1	protein_coding
ENSG00000138738	PR domain containing 5 [Source:HGNC Symbol;Acc:HGNC:9349]	PRDM5	4	120684919	120922870	-1	protein_coding
ENSG00000168569	transmembrane protein 223 [Source:HGNC Symbol;Acc:HGNC:28464]	TMEM223	11	62771629	62792021	-1	protein_coding
ENSG00000185475	transmembrane protein 179B [Source:HGNC Symbol;Acc:HGNC:33744]	TMEM179B	11	62787415	62790405	1	protein_coding
ENSG00000017427	insulin like growth factor 1 [Source:HGNC Symbol;Acc:HGNC:5464]	IGF1	12	102395867	102480645	-1	protein_coding
ENSG00000162231	nuclear RNA export factor 1 [Source:HGNC Symbol;Acc:HGNC:8071]	NXF1	11	62792123	62806302	-1	protein_coding
ENSG00000125813	paired box 1 [Source:HGNC Symbol;Acc:HGNC:8615]	PAX1	20	21705659	21718486	1	protein_coding
ENSG00000173376	neuron-derived neurotrophic factor [Source:HGNC Symbol;Acc:HGNC:26256]	NDNF	4	121035613	121073021	-1	protein_coding
ENSG00000125798	forkhead box A2 [Source:HGNC Symbol;Acc:HGNC:5022]	FOXA2	20	22581005	22585455	-1	protein_coding
ENSG00000132671	somatostatin receptor 4 [Source:HGNC Symbol;Acc:HGNC:11333]	SSTR4	20	23035386	23036812	1	protein_coding
ENSG00000178726	thrombomodulin [Source:HGNC Symbol;Acc:HGNC:11784]	THBD	20	23045633	23049741	-1	protein_coding
ENSG00000171759	phenylalanine hydroxylase [Source:HGNC Symbol;Acc:HGNC:8582]	PAH	12	102836885	102958410	-1	protein_coding
ENSG00000125810	CD93 molecule [Source:HGNC Symbol;Acc:HGNC:15855]	CD93	20	23079349	23086340	-1	protein_coding
ENSG00000132661	nuclear transport factor 2-like export factor 1 [Source:HGNC Symbol;Acc:HGNC:15913]	NXT1	20	23350736	23354777	1	protein_coding
ENSG00000125812	GDNF-inducible zinc finger protein 1 [Source:HGNC Symbol;Acc:HGNC:15808]	GZF1	20	23362182	23373063	1	protein_coding
ENSG00000050730	TNFAIP3 interacting protein 3 [Source:HGNC Symbol;Acc:HGNC:19315]	TNIP3	4	121131408	121227466	-1	protein_coding
ENSG00000125814	NSF attachment protein beta [Source:HGNC Symbol;Acc:HGNC:15751]	NAPB	20	23374519	23421519	-1	protein_coding
ENSG00000110871	coenzyme Q5, methyltransferase [Source:HGNC Symbol;Acc:HGNC:28722]	COQ5	12	120503274	120534434	-1	protein_coding
ENSG00000186867	pyroglutamylated RFamide peptide receptor [Source:HGNC Symbol;Acc:HGNC:15565]	QRFPR	4	121329312	121381059	-1	protein_coding
ENSG00000100722	zinc finger CCCH-type containing 14 [Source:HGNC Symbol;Acc:HGNC:20509]	ZC3H14	14	88562909	88627596	1	protein_coding
ENSG00000158604	transmembrane p24 trafficking protein 4 [Source:HGNC Symbol;Acc:HGNC:22301]	TMED4	7	44577894	44582287	-1	protein_coding
ENSG00000164111	annexin A5 [Source:HGNC Symbol;Acc:HGNC:543]	ANXA5	4	121667955	121697113	-1	protein_coding
ENSG00000125823	cystatin-like 1 [Source:HGNC Symbol;Acc:HGNC:15958]	CSTL1	20	23439685	23444930	1	protein_coding
ENSG00000125831	cystatin 11 [Source:HGNC Symbol;Acc:HGNC:15959]	CST11	20	23450403	23452857	-1	protein_coding
ENSG00000105953	oxoglutarate (alpha-ketoglutarate) dehydrogenase (lipoamide) [Source:HGNC Symbol;Acc:HGNC:8124]	OGDH	7	44606572	44709066	1	protein_coding
ENSG00000125815	cystatin 8 [Source:HGNC Symbol;Acc:HGNC:2480]	CST8	20	23491101	23496018	1	protein_coding
ENSG00000101435	cystatin 9-like [Source:HGNC Symbol;Acc:HGNC:16233]	CST9L	20	23564732	23568749	-1	protein_coding
ENSG00000022840	ring finger protein 10 [Source:HGNC Symbol;Acc:HGNC:10055]	RNF10	12	120533480	120577594	1	protein_coding
ENSG00000164112	transmembrane protein 155 [Source:HGNC Symbol;Acc:HGNC:26418]	TMEM155	4	121758933	121765427	-1	protein_coding
ENSG00000123737	exosome component 9 [Source:HGNC Symbol;Acc:HGNC:9137]	EXOSC9	4	121801317	121817021	1	protein_coding
ENSG00000139352	achaete-scute family bHLH transcription factor 1 [Source:HGNC Symbol;Acc:HGNC:738]	ASCL1	12	102957686	102960516	1	protein_coding
ENSG00000257860		RP11-552I14.1	12	103151842	103168309	1	lincRNA
ENSG00000179088	chromosome 12 open reading frame 42 [Source:HGNC Symbol;Acc:HGNC:24729]	C12orf42	12	103237591	103496010	-1	protein_coding
ENSG00000158483	family with sequence similarity 86 member C1 [Source:HGNC Symbol;Acc:HGNC:25561]	FAM86C1	11	71787510	71801236	1	protein_coding
ENSG00000184276	defensin beta 108B [Source:HGNC Symbol;Acc:HGNC:29966]	DEFB108B	11	71833200	71837710	1	protein_coding
ENSG00000254469	Putative short transient receptor potential channel 2-like protein [Source:UniProtKB/Swiss-Prot;Acc:Q6ZNB5]	RP11-849H4.2	11	71865509	71928654	-1	protein_coding
ENSG00000145386	cyclin A2 [Source:HGNC Symbol;Acc:HGNC:1578]	CCNA2	4	121816444	121823933	-1	protein_coding
ENSG00000137522	ring finger protein 121 [Source:HGNC Symbol;Acc:HGNC:21070]	RNF121	11	71928701	71997597	1	protein_coding
ENSG00000138686	Bardet-Biedl syndrome 7 [Source:HGNC Symbol;Acc:HGNC:18758]	BBS7	4	121824440	121870497	-1	protein_coding
ENSG00000137496	interleukin 18 binding protein [Source:HGNC Symbol;Acc:HGNC:5987]	IL18BP	11	71998541	72005715	1	protein_coding
ENSG00000122515	zinc finger, MIZ-type containing 2 [Source:HGNC Symbol;Acc:HGNC:22229]	ZMIZ2	7	44748581	44769881	1	protein_coding
ENSG00000138741	transient receptor potential cation channel, subfamily C, member 3 [Source:HGNC Symbol;Acc:HGNC:12335]	TRPC3	4	121879027	121951754	-1	protein_coding
ENSG00000167272	POP5 homolog, ribonuclease P/MRP subunit [Source:HGNC Symbol;Acc:HGNC:17689]	POP5	12	120578764	120581398	-1	protein_coding
ENSG00000157782	calcium binding protein 1 [Source:HGNC Symbol;Acc:HGNC:1384]	CABP1	12	120640552	120667324	1	protein_coding
ENSG00000137497	nuclear mitotic apparatus protein 1 [Source:HGNC Symbol;Acc:HGNC:8059]	NUMA1	11	72002864	72080693	-1	protein_coding
ENSG00000196262	peptidylprolyl isomerase A (cyclophilin A) [Source:HGNC Symbol;Acc:HGNC:9253]	PPIA	7	44796680	44824564	1	protein_coding
ENSG00000165521	echinoderm microtubule associated protein like 5 [Source:HGNC Symbol;Acc:HGNC:18197]	EML5	14	88612431	88792752	-1	protein_coding
ENSG00000105968	H2A histone family member V [Source:HGNC Symbol;Acc:HGNC:20664]	H2AFV	7	44826791	44848083	-1	protein_coding
ENSG00000110917	malectin [Source:HGNC Symbol;Acc:HGNC:28973]	MLEC	12	120686869	120701864	1	protein_coding
ENSG00000175970	unc-119 lipid binding chaperone B [Source:HGNC Symbol;Acc:HGNC:16488]	UNC119B	12	120710435	120723640	1	protein_coding
ENSG00000253958	claudin 23 [Source:HGNC Symbol;Acc:HGNC:17591]	CLDN23	8	8701938	8704106	1	protein_coding
ENSG00000146676	purine-rich element binding protein B [Source:HGNC Symbol;Acc:HGNC:9702]	PURB	7	44876293	44885361	-1	protein_coding
ENSG00000147324	malignant fibrous histiocytoma amplified sequence 1 [Source:HGNC Symbol;Acc:HGNC:16982]	MFHAS1	8	8783354	8893645	-1	protein_coding
ENSG00000122971	acyl-CoA dehydrogenase, C-2 to C-3 short chain [Source:HGNC Symbol;Acc:HGNC:90]	ACADS	12	120725735	120740008	1	protein_coding
ENSG00000136286	myosin IG [Source:HGNC Symbol;Acc:HGNC:13880]	MYO1G	7	44962662	44979098	-1	protein_coding
ENSG00000104626	exoribonuclease 1 [Source:HGNC Symbol;Acc:HGNC:23994]	ERI1	8	9002147	9116746	1	protein_coding
ENSG00000184154	leucine rich transmembrane and O-methyltransferase domain containing [Source:HGNC Symbol;Acc:HGNC:25033]	LRTOMT	11	72080331	72110782	1	protein_coding
ENSG00000157837	signal peptide peptidase like 3 [Source:HGNC Symbol;Acc:HGNC:30424]	SPPL3	12	120762510	120904371	-1	protein_coding
ENSG00000149357	late endosomal/lysosomal adaptor, MAPK and MTOR activator 1 [Source:HGNC Symbol;Acc:HGNC:26068]	LAMTOR1	11	72085895	72103387	-1	protein_coding
ENSG00000110200	anaphase promoting complex subunit 15 [Source:HGNC Symbol;Acc:HGNC:24531]	ANAPC15	11	72106378	72112780	-1	protein_coding
ENSG00000136280	cerebral cavernous malformation 2 [Source:HGNC Symbol;Acc:HGNC:21708]	CCM2	7	44999475	45076469	1	protein_coding
ENSG00000110203	folate receptor 3 (gamma) [Source:HGNC Symbol;Acc:HGNC:3795]	FOLR3	11	72114869	72139892	1	protein_coding
ENSG00000110195	folate receptor 1 (adult) [Source:HGNC Symbol;Acc:HGNC:3791]	FOLR1	11	72189558	72196301	1	protein_coding
ENSG00000165457	folate receptor 2 (fetal) [Source:HGNC Symbol;Acc:HGNC:3793]	FOLR2	11	72216601	72221950	1	protein_coding
ENSG00000165458	inositol polyphosphate phosphatase like 1 [Source:HGNC Symbol;Acc:HGNC:6080]	INPPL1	11	72223701	72239105	1	protein_coding
ENSG00000165533	tetratricopeptide repeat domain 8 [Source:HGNC Symbol;Acc:HGNC:20087]	TTC8	14	88824153	88881078	1	protein_coding
ENSG00000160124	coiled-coil domain containing 58 [Source:HGNC Symbol;Acc:HGNC:31136]	CCDC58	3	122359591	122383231	-1	protein_coding
ENSG00000165462	paired-like homeobox 2a [Source:HGNC Symbol;Acc:HGNC:691]	PHOX2A	11	72239077	72245664	-1	protein_coding
ENSG00000114023	family with sequence similarity 162 member A [Source:HGNC Symbol;Acc:HGNC:17865]	FAM162A	3	122384176	122412334	1	protein_coding
ENSG00000162129	ClpB homolog, mitochondrial AAA ATPase chaperonin [Source:HGNC Symbol;Acc:HGNC:30664]	CLPB	11	72292425	72434680	-1	protein_coding
ENSG00000196981	WD repeat domain 5B [Source:HGNC Symbol;Acc:HGNC:17826]	WDR5B	3	122412332	122416051	-1	protein_coding
ENSG00000114030	karyopherin alpha 1 [Source:HGNC Symbol;Acc:HGNC:6394]	KPNA1	3	122421949	122514945	-1	protein_coding
ENSG00000053254	forkhead box N3 [Source:HGNC Symbol;Acc:HGNC:1928]	FOXN3	14	89124871	89619149	-1	protein_coding
ENSG00000186642	phosphodiesterase 2A [Source:HGNC Symbol;Acc:HGNC:8777]	PDE2A	11	72576141	72674591	-1	protein_coding
ENSG00000138496	poly(ADP-ribose) polymerase family member 9 [Source:HGNC Symbol;Acc:HGNC:24118]	PARP9	3	122527924	122564577	-1	protein_coding
ENSG00000163840	deltex 3 like, E3 ubiquitin ligase [Source:HGNC Symbol;Acc:HGNC:30323]	DTX3L	3	122564238	122575203	1	protein_coding
ENSG00000173200	poly(ADP-ribose) polymerase family member 15 [Source:HGNC Symbol;Acc:HGNC:26876]	PARP15	3	122577602	122639047	1	protein_coding
ENSG00000258792		RP11-944C7.1	14	89628921	89642671	-1	lincRNA
ENSG00000140025	EF-hand calcium binding domain 11 [Source:HGNC Symbol;Acc:HGNC:20357]	EFCAB11	14	89794669	89954777	-1	protein_coding
ENSG00000136267	diacylglycerol kinase beta [Source:HGNC Symbol;Acc:HGNC:2850]	DGKB	7	14145049	14974777	-1	protein_coding
ENSG00000186635	ArfGAP with RhoGAP domain, ankyrin repeat and PH domain 1 [Source:HGNC Symbol;Acc:HGNC:16925]	ARAP1	11	72685069	72793599	-1	protein_coding
ENSG00000173193	poly(ADP-ribose) polymerase family member 14 [Source:HGNC Symbol;Acc:HGNC:29232]	PARP14	3	122680618	122730840	1	protein_coding
ENSG00000042088	tyrosyl-DNA phosphodiesterase 1 [Source:HGNC Symbol;Acc:HGNC:18884]	TDP1	14	89954939	90044768	1	protein_coding
ENSG00000187546	alkylglycerol monooxygenase [Source:HGNC Symbol;Acc:HGNC:33784]	AGMO	7	15200318	15562015	-1	protein_coding
ENSG00000218839	family with sequence similarity 138 member C [Source:HGNC Symbol;Acc:HGNC:32333]	FAM138C	9	34394	35871	-1	lincRNA
ENSG00000227917		RP11-143M1.3	9	100804	102941	-1	lincRNA
ENSG00000231808	long intergenic non-protein coding RNA 1388 [Source:HGNC Symbol;Acc:HGNC:50660]	LINC01388	9	112713	113754	-1	lincRNA
ENSG00000106511	mesenchyme homeobox 2 [Source:HGNC Symbol;Acc:HGNC:7014]	MEOX2	7	15611212	15686812	-1	protein_coding
ENSG00000169087	HSPB (heat shock 27kDa) associated protein 1 [Source:HGNC Symbol;Acc:HGNC:16389]	HSPBAP1	3	122740003	122793824	-1	protein_coding
ENSG00000232104	RFX3 antisense RNA 1 [Source:HGNC Symbol;Acc:HGNC:51197]	RFX3-AS1	9	3526723	3691814	1	lincRNA
ENSG00000237359		RP11-509J21.2	9	3647335	3648338	1	lincRNA
ENSG00000226669		RP11-509J21.4	9	3684076	3689626	-1	lincRNA
ENSG00000138463	disrupted in renal carcinoma 2 [Source:HGNC Symbol;Acc:HGNC:16628]	DIRC2	3	122794795	122881139	1	protein_coding
ENSG00000214530	StAR related lipid transfer domain containing 10 [Source:HGNC Symbol;Acc:HGNC:10666]	STARD10	11	72754729	72794168	-1	protein_coding
ENSG00000261696		RP11-354P17.15	9	21394888	21396346	-1	lincRNA
ENSG00000152315	potassium channel, two pore domain subfamily K, member 13 [Source:HGNC Symbol;Acc:HGNC:6275]	KCNK13	14	90061765	90185857	1	protein_coding
ENSG00000100764	proteasome 26S subunit, ATPase 1 [Source:HGNC Symbol;Acc:HGNC:9547]	PSMC1	14	90256495	90275429	1	protein_coding
ENSG00000236921		RP11-408N14.1	9	22203990	22214672	-1	lincRNA
ENSG00000234840	long intergenic non-protein coding RNA 1239 [Source:HGNC Symbol;Acc:HGNC:49796]	LINC01239	9	22646200	22824213	1	lincRNA
ENSG00000224549		RP11-370B11.3	9	22767175	22768316	1	lincRNA
ENSG00000168010	autophagy related 16 like 2 [Source:HGNC Symbol;Acc:HGNC:25464]	ATG16L2	11	72814308	72843674	1	protein_coding
ENSG00000082684	sema domain, seven thrombospondin repeats (type 1 and type 1-like), transmembrane domain (TM) and short cytoplasmic domain, (semaphorin) 5B [Source:HGNC Symbol;Acc:HGNC:10737]	SEMA5B	3	122909193	123028605	-1	protein_coding
ENSG00000119720	NRDE-2, necessary for RNA interference, domain containing [Source:HGNC Symbol;Acc:HGNC:20186]	NRDE2	14	90267856	90332137	-1	protein_coding
ENSG00000137478	FCH and double SH3 domains 2 [Source:HGNC Symbol;Acc:HGNC:29114]	FCHSD2	11	72836745	73142261	-1	protein_coding
ENSG00000065485	protein disulfide isomerase family A member 5 [Source:HGNC Symbol;Acc:HGNC:24811]	PDIA5	3	123067062	123225227	1	protein_coding
ENSG00000175591	purinergic receptor P2Y, G-protein coupled, 2 [Source:HGNC Symbol;Acc:HGNC:8541]	P2RY2	11	73218298	73236352	1	protein_coding
ENSG00000171631	pyrimidinergic receptor P2Y, G-protein coupled, 6 [Source:HGNC Symbol;Acc:HGNC:8543]	P2RY6	11	73264505	73298617	1	protein_coding
ENSG00000198668	calmodulin 1 (phosphorylase kinase, delta) [Source:HGNC Symbol;Acc:HGNC:1442]	CALM1	14	90396502	90408261	1	protein_coding
ENSG00000121542	SEC22 homolog A, vesicle trafficking protein [Source:HGNC Symbol;Acc:HGNC:20260]	SEC22A	3	123201927	123274130	1	protein_coding
ENSG00000110237	Rho guanine nucleotide exchange factor 17 [Source:HGNC Symbol;Acc:HGNC:21726]	ARHGEF17	11	73308289	73369091	1	protein_coding
ENSG00000054967	RELT tumor necrosis factor receptor [Source:HGNC Symbol;Acc:HGNC:13764]	RELT	11	73376264	73397474	1	protein_coding
ENSG00000054965	family with sequence similarity 168 member A [Source:HGNC Symbol;Acc:HGNC:28999]	FAM168A	11	73400487	73598189	-1	protein_coding
ENSG00000173175	adenylate cyclase 5 [Source:HGNC Symbol;Acc:HGNC:236]	ADCY5	3	123282296	123449758	-1	protein_coding
ENSG00000021300	pleckstrin homology domain containing B1 [Source:HGNC Symbol;Acc:HGNC:19079]	PLEKHB1	11	73646178	73662819	1	protein_coding
ENSG00000165914	tetratricopeptide repeat domain 7B [Source:HGNC Symbol;Acc:HGNC:19858]	TTC7B	14	90524564	90816479	-1	protein_coding
ENSG00000175582	RAB6A, member RAS oncogene family [Source:HGNC Symbol;Acc:HGNC:9786]	RAB6A	11	73675638	73761137	-1	protein_coding
ENSG00000124491	coagulation factor XIII, A1 polypeptide [Source:HGNC Symbol;Acc:HGNC:3531]	F13A1	6	6144085	6321013	-1	protein_coding
ENSG00000206527	3-hydroxyacyl-CoA dehydratase 2 [Source:HGNC Symbol;Acc:HGNC:9640]	HACD2	3	123490820	123585185	-1	protein_coding
ENSG00000065534	myosin light chain kinase [Source:HGNC Symbol;Acc:HGNC:7590]	MYLK	3	123610049	123884331	-1	protein_coding
ENSG00000112799	lymphocyte antigen 86 [Source:HGNC Symbol;Acc:HGNC:16837]	LY86	6	6588108	6654983	1	protein_coding
ENSG00000136274	NAC alpha domain containing [Source:HGNC Symbol;Acc:HGNC:22196]	NACAD	7	45080438	45088914	-1	protein_coding
ENSG00000136270	transforming growth factor beta regulator 4 [Source:HGNC Symbol;Acc:HGNC:17443]	TBRG4	7	45100100	45112047	-1	protein_coding
ENSG00000124782	ras responsive element binding protein 1 [Source:HGNC Symbol;Acc:HGNC:10449]	RREB1	6	7107597	7251980	1	protein_coding
ENSG00000122679	receptor (G protein-coupled) activity modifying protein 3 [Source:HGNC Symbol;Acc:HGNC:9845]	RAMP3	7	45157791	45186302	1	protein_coding
ENSG00000124783	signal sequence receptor, alpha [Source:HGNC Symbol;Acc:HGNC:11323]	SSR1	6	7268306	7347446	-1	protein_coding
ENSG00000144642	RNA binding motif, single stranded interacting protein 3 [Source:HGNC Symbol;Acc:HGNC:13427]	RBMS3	3	29280982	30010391	1	protein_coding
ENSG00000119950	MAX interactor 1, dimerization protein [Source:HGNC Symbol;Acc:HGNC:7534]	MXI1	10	110207605	110287365	1	protein_coding
ENSG00000163513	transforming growth factor beta receptor II [Source:HGNC Symbol;Acc:HGNC:11773]	TGFBR2	3	30606502	30694142	1	protein_coding
ENSG00000119953	survival motor neuron domain containing 1 [Source:HGNC Symbol;Acc:HGNC:16900]	SMNDC1	10	110290730	110304951	-1	protein_coding
ENSG00000144644	glutamate decarboxylase like 1 [Source:HGNC Symbol;Acc:HGNC:27949]	GADL1	3	30726200	30894765	-1	protein_coding
ENSG00000175455	coiled-coil domain containing 14 [Source:HGNC Symbol;Acc:HGNC:25766]	CCDC14	3	123897305	123961408	-1	protein_coding
ENSG00000164304	cancer antigen 1 [Source:HGNC Symbol;Acc:HGNC:21622]	CAGE1	6	7326656	7389743	-1	protein_coding
ENSG00000065371	rhophilin associated tail protein 1 [Source:HGNC Symbol;Acc:HGNC:17692]	ROPN1	3	123968521	123992178	-1	protein_coding
ENSG00000138166	dual specificity phosphatase 5 [Source:HGNC Symbol;Acc:HGNC:3071]	DUSP5	10	110497838	110511544	1	protein_coding
ENSG00000124784	RIO kinase 1 [Source:HGNC Symbol;Acc:HGNC:18656]	RIOK1	6	7389496	7418037	1	protein_coding
ENSG00000108055	structural maintenance of chromosomes 3 [Source:HGNC Symbol;Acc:HGNC:2468]	SMC3	10	110567691	110604636	1	protein_coding
ENSG00000160145	kalirin, RhoGEF kinase [Source:HGNC Symbol;Acc:HGNC:4814]	KALRN	3	124080023	124726325	1	protein_coding
ENSG00000188730	von Willebrand factor C domain containing 2 [Source:HGNC Symbol;Acc:HGNC:30200]	VWC2	7	49773661	49921950	1	protein_coding
ENSG00000042813	zona pellucida binding protein [Source:HGNC Symbol;Acc:HGNC:15662]	ZPBP	7	49850421	50121329	-1	protein_coding
ENSG00000157613	cAMP responsive element binding protein 3-like 1 [Source:HGNC Symbol;Acc:HGNC:18856]	CREB3L1	11	46277661	46321422	1	protein_coding
ENSG00000203867	RNA binding motif protein 20 [Source:HGNC Symbol;Acc:HGNC:27424]	RBM20	10	110644397	110839469	1	protein_coding
ENSG00000147677	eukaryotic translation initiation factor 3 subunit H [Source:HGNC Symbol;Acc:HGNC:3273]	EIF3H	8	116642130	116766925	-1	protein_coding
ENSG00000147679	UTP23, small subunit processome component [Source:HGNC Symbol;Acc:HGNC:28224]	UTP23	8	116766503	116849463	1	protein_coding
ENSG00000150593	programmed cell death 4 (neoplastic transformation inhibitor) [Source:HGNC Symbol;Acc:HGNC:8763]	PDCD4	10	110871795	110900006	1	protein_coding
ENSG00000164500	chromosome 7 open reading frame 72 [Source:HGNC Symbol;Acc:HGNC:22564]	C7orf72	7	50096036	50159830	1	protein_coding
ENSG00000185811	IKAROS family zinc finger 1 [Source:HGNC Symbol;Acc:HGNC:13176]	IKZF1	7	50304124	50405101	1	protein_coding
ENSG00000164754	RAD21 cohesin complex component [Source:HGNC Symbol;Acc:HGNC:9811]	RAD21	8	116845935	116874866	-1	protein_coding
ENSG00000149091	diacylglycerol kinase, zeta [Source:HGNC Symbol;Acc:HGNC:2857]	DGKZ	11	46332905	46380554	1	protein_coding
ENSG00000132436	fidgetin-like 1 [Source:HGNC Symbol;Acc:HGNC:13286]	FIGNL1	7	50444128	50542535	-1	protein_coding
ENSG00000198648	serine/threonine kinase 39 [Source:HGNC Symbol;Acc:HGNC:17717]	STK39	2	167954020	168248141	-1	protein_coding
ENSG00000110492	midkine (neurite growth-promoting factor 2) [Source:HGNC Symbol;Acc:HGNC:6972]	MDK	11	46380756	46383837	1	protein_coding
ENSG00000214413	BBSome interacting protein 1 [Source:HGNC Symbol;Acc:HGNC:28093]	BBIP1	10	110898730	110919274	-1	protein_coding
ENSG00000205002	alanine and arginine rich domain containing protein [Source:HGNC Symbol;Acc:HGNC:33842]	AARD	8	116938199	116944487	1	protein_coding
ENSG00000164756	solute carrier family 30 (zinc transporter), member 8 [Source:HGNC Symbol;Acc:HGNC:20303]	SLC30A8	8	116950273	117176714	1	protein_coding
ENSG00000132437	dopa decarboxylase [Source:HGNC Symbol;Acc:HGNC:2719]	DDC	7	50458436	50565457	-1	protein_coding
ENSG00000180720	cholinergic receptor, muscarinic 4 [Source:HGNC Symbol;Acc:HGNC:1953]	CHRM4	11	46385098	46386608	-1	protein_coding
ENSG00000172292	ceramide synthase 6 [Source:HGNC Symbol;Acc:HGNC:23826]	CERS6	2	168455862	168775137	1	protein_coding
ENSG00000110497	autophagy/beclin-1 regulator 1 [Source:HGNC Symbol;Acc:HGNC:25990]	AMBRA1	11	46396414	46594125	-1	protein_coding
ENSG00000164758	mediator complex subunit 30 [Source:HGNC Symbol;Acc:HGNC:23032]	MED30	8	117520713	117540262	1	protein_coding
ENSG00000182197	exostosin glycosyltransferase 1 [Source:HGNC Symbol;Acc:HGNC:3512]	EXT1	8	117794490	118111853	-1	protein_coding
ENSG00000108061	SHOC2 leucine-rich repeat scaffold protein [Source:HGNC Symbol;Acc:HGNC:15454]	SHOC2	10	110919547	111013667	1	protein_coding
ENSG00000180423	harbinger transposase derived 1 [Source:HGNC Symbol;Acc:HGNC:26522]	HARBI1	11	46602861	46617909	-1	protein_coding
ENSG00000163072	nitric oxide synthase trafficking [Source:HGNC Symbol;Acc:HGNC:20203]	NOSTRIN	2	168786539	168865514	1	protein_coding
ENSG00000175224	autophagy related 13 [Source:HGNC Symbol;Acc:HGNC:29091]	ATG13	11	46617527	46674818	1	protein_coding
ENSG00000150594	adrenoceptor alpha 2A [Source:HGNC Symbol;Acc:HGNC:281]	ADRA2A	10	111077163	111080907	1	protein_coding
ENSG00000175220	Rho GTPase activating protein 1 [Source:HGNC Symbol;Acc:HGNC:673]	ARHGAP1	11	46677080	46700615	-1	protein_coding
ENSG00000119927	glycerol-3-phosphate acyltransferase, mitochondrial [Source:HGNC Symbol;Acc:HGNC:24865]	GPAM	10	112149864	112215377	-1	protein_coding
ENSG00000106070	growth factor receptor bound protein 10 [Source:HGNC Symbol;Acc:HGNC:4564]	GRB10	7	50590063	50793462	-1	protein_coding
ENSG00000175213	zinc finger protein 408 [Source:HGNC Symbol;Acc:HGNC:20041]	ZNF408	11	46700818	46705912	1	protein_coding
ENSG00000152253	SPC25, NDC80 kinetochore complex component [Source:HGNC Symbol;Acc:HGNC:24031]	SPC25	2	168834132	168913371	-1	protein_coding
ENSG00000152254	glucose-6-phosphatase, catalytic, 2 [Source:HGNC Symbol;Acc:HGNC:28906]	G6PC2	2	168901240	168910000	1	protein_coding
ENSG00000073734	ATP binding cassette subfamily B member 11 [Source:HGNC Symbol;Acc:HGNC:42]	ABCB11	2	168922938	169031322	-1	protein_coding
ENSG00000180210	coagulation factor II (thrombin) [Source:HGNC Symbol;Acc:HGNC:3535]	F2	11	46719180	46739506	1	protein_coding
ENSG00000073737	dehydrogenase/reductase (SDR family) member 9 [Source:HGNC Symbol;Acc:HGNC:16888]	DHRS9	2	169064789	169096167	1	protein_coding
ENSG00000175216	cytoskeleton associated protein 5 [Source:HGNC Symbol;Acc:HGNC:28959]	CKAP5	11	46743048	46846308	-1	protein_coding
ENSG00000134569	LDL receptor related protein 4 [Source:HGNC Symbol;Acc:HGNC:6696]	LRP4	11	46856868	46918642	-1	protein_coding
ENSG00000149179	chromosome 11 open reading frame 49 [Source:HGNC Symbol;Acc:HGNC:28720]	C11orf49	11	46936689	47164385	1	protein_coding
ENSG00000106078	cordon-bleu WH2 repeat protein [Source:HGNC Symbol;Acc:HGNC:22199]	COBL	7	51016212	51316818	-1	protein_coding
ENSG00000081479	LDL receptor related protein 2 [Source:HGNC Symbol;Acc:HGNC:6694]	LRP2	2	169127109	169362685	-1	protein_coding
ENSG00000149182	ADP ribosylation factor GTPase activating protein 2 [Source:HGNC Symbol;Acc:HGNC:13504]	ARFGAP2	11	47164299	47177125	-1	protein_coding
ENSG00000165912	protein kinase C and casein kinase substrate in neurons 3 [Source:HGNC Symbol;Acc:HGNC:8572]	PACSIN3	11	47177525	47186443	-1	protein_coding
ENSG00000134574	damage-specific DNA binding protein 2 [Source:HGNC Symbol;Acc:HGNC:2718]	DDB2	11	47214465	47239240	1	protein_coding
ENSG00000227489		AC006458.3	7	15066207	15068651	1	lincRNA
ENSG00000229108	MEOX2 antisense RNA 1 (head to head) [Source:HGNC Symbol;Acc:HGNC:50672]	MEOX2-AS1	7	15688378	15695491	1	lincRNA
ENSG00000225974		AC005550.5	7	15689075	15690854	-1	lincRNA
ENSG00000229379		AC006041.1	7	15841297	15842360	-1	lincRNA
ENSG00000134575	acid phosphatase 2, lysosomal [Source:HGNC Symbol;Acc:HGNC:123]	ACP2	11	47239302	47248906	-1	protein_coding
ENSG00000025434	nuclear receptor subfamily 1 group H member 3 [Source:HGNC Symbol;Acc:HGNC:7966]	NR1H3	11	47248300	47269032	1	protein_coding
ENSG00000163093	Bardet-Biedl syndrome 5 [Source:HGNC Symbol;Acc:HGNC:970]	BBS5	2	169479178	169506655	1	protein_coding
ENSG00000251569		RP11-724O16.1	2	169479480	169525922	1	protein_coding
ENSG00000239474	kelch like family member 41 [Source:HGNC Symbol;Acc:HGNC:16905]	KLHL41	2	169509702	169526262	1	protein_coding
ENSG00000138399	FAST kinase domains 1 [Source:HGNC Symbol;Acc:HGNC:26150]	FASTKD1	2	169529749	169573875	-1	protein_coding
ENSG00000138398	peptidylprolyl isomerase G (cyclophilin G) [Source:HGNC Symbol;Acc:HGNC:14650]	PPIG	2	169584340	169641406	1	protein_coding
ENSG00000154479	coiled-coil domain containing 173 [Source:HGNC Symbol;Acc:HGNC:25064]	CCDC173	2	169645425	169694433	-1	protein_coding
ENSG00000110514	MAP-kinase activating death domain [Source:HGNC Symbol;Acc:HGNC:6766]	MADD	11	47269161	47330031	1	protein_coding
ENSG00000144362	phosphatase, orphan 2 [Source:HGNC Symbol;Acc:HGNC:28316]	PHOSPHO2	2	169694454	169701708	1	protein_coding
ENSG00000213160	kelch like family member 23 [Source:HGNC Symbol;Acc:HGNC:27506]	KLHL23	2	169694488	169776989	1	protein_coding
ENSG00000138385	Sjogren syndrome antigen B [Source:HGNC Symbol;Acc:HGNC:11316]	SSB	2	169791933	169812064	1	protein_coding
ENSG00000156931	VPS8, CORVET complex subunit [Source:HGNC Symbol;Acc:HGNC:29122]	VPS8	3	184812143	185052614	1	protein_coding
ENSG00000134571	myosin binding protein C, cardiac [Source:HGNC Symbol;Acc:HGNC:7551]	MYBPC3	11	47331397	47352702	-1	protein_coding
ENSG00000066336	Spi-1 proto-oncogene [Source:HGNC Symbol;Acc:HGNC:11241]	SPI1	11	47354860	47378576	-1	protein_coding
ENSG00000138382	methyltransferase like 5 [Source:HGNC Symbol;Acc:HGNC:25006]	METTL5	2	169810081	169824931	-1	protein_coding
ENSG00000165915	solute carrier family 39 (zinc transporter), member 13 [Source:HGNC Symbol;Acc:HGNC:20859]	SLC39A13	11	47407132	47416501	1	protein_coding
ENSG00000165916	proteasome 26S subunit, ATPase 3 [Source:HGNC Symbol;Acc:HGNC:9549]	PSMC3	11	47418769	47426473	-1	protein_coding
ENSG00000165917	receptor associated protein of the synapse [Source:HGNC Symbol;Acc:HGNC:9863]	RAPSN	11	47437757	47449178	-1	protein_coding
ENSG00000149187	CUGBP, Elav-like family member 1 [Source:HGNC Symbol;Acc:HGNC:2549]	CELF1	11	47465944	47565569	-1	protein_coding
ENSG00000144357	ubiquitin protein ligase E3 component n-recognin 3 (putative) [Source:HGNC Symbol;Acc:HGNC:30467]	UBR3	2	169827458	170084131	1	protein_coding
ENSG00000213619	NADH:ubiquinone oxidoreductase core subunit S3 [Source:HGNC Symbol;Acc:HGNC:7710]	NDUFS3	11	47565336	47584562	1	protein_coding
ENSG00000110536	protein tyrosine phosphatase, mitochondrial 1 [Source:HGNC Symbol;Acc:HGNC:26965]	PTPMT1	11	47565430	47573461	1	protein_coding
ENSG00000123444	kelch repeat and BTB (POZ) domain containing 4 [Source:HGNC Symbol;Acc:HGNC:23761]	KBTBD4	11	47572197	47579015	-1	protein_coding
ENSG00000187068	chromosome 3 open reading frame 70 [Source:HGNC Symbol;Acc:HGNC:33731]	C3orf70	3	185078050	185153014	-1	protein_coding
ENSG00000113790	enoyl-CoA, hydratase/3-hydroxyacyl CoA dehydrogenase [Source:HGNC Symbol;Acc:HGNC:3247]	EHHADH	3	185190624	185281990	-1	protein_coding
ENSG00000196666	family with sequence similarity 180 member B [Source:HGNC Symbol;Acc:HGNC:34451]	FAM180B	11	47586693	47589194	1	protein_coding
ENSG00000172247	C1q and tumor necrosis factor related protein 4 [Source:HGNC Symbol;Acc:HGNC:14346]	C1QTNF4	11	47589664	47594659	-1	protein_coding
ENSG00000109919	mitochondrial carrier 2 [Source:HGNC Symbol;Acc:HGNC:17587]	MTCH2	11	47617315	47642623	-1	protein_coding
ENSG00000165923	ATP/GTP binding protein-like 2 [Source:HGNC Symbol;Acc:HGNC:26296]	AGBL2	11	47659591	47715389	-1	protein_coding
ENSG00000073803	mitogen-activated protein kinase kinase kinase 13 [Source:HGNC Symbol;Acc:HGNC:6852]	MAP3K13	3	185282941	185489097	1	protein_coding
ENSG00000109920	formin binding protein 4 [Source:HGNC Symbol;Acc:HGNC:19752]	FNBP4	11	47716517	47767443	-1	protein_coding
ENSG00000030066	nucleoporin 160kDa [Source:HGNC Symbol;Acc:HGNC:18017]	NUP160	11	47778087	47848555	-1	protein_coding
ENSG00000163900	transmembrane protein 41A [Source:HGNC Symbol;Acc:HGNC:30544]	TMEM41A	3	185476496	185499057	-1	protein_coding
ENSG00000138095	leucine rich pentatricopeptide repeat containing [Source:HGNC Symbol;Acc:HGNC:15714]	LRPPRC	2	43886508	43996005	-1	protein_coding
ENSG00000163898	lipase, member H [Source:HGNC Symbol;Acc:HGNC:18483]	LIPH	3	185506262	185552613	-1	protein_coding
ENSG00000149177	protein tyrosine phosphatase, receptor type, J [Source:HGNC Symbol;Acc:HGNC:9673]	PTPRJ	11	47980558	48170841	1	protein_coding
ENSG00000175619	olfactory receptor family 4 subfamily B member 1 [Source:HGNC Symbol;Acc:HGNC:8290]	OR4B1	11	48216792	48217762	1	protein_coding
ENSG00000176567	olfactory receptor family 4 subfamily X member 1 (gene/pseudogene) [Source:HGNC Symbol;Acc:HGNC:14854]	OR4X1	11	48263861	48264778	1	protein_coding
ENSG00000176555	olfactory receptor family 4 subfamily S member 1 [Source:HGNC Symbol;Acc:HGNC:14705]	OR4S1	11	48306223	48307152	1	protein_coding
ENSG00000163904	SUMO1/sentrin/SMT3 specific peptidase 2 [Source:HGNC Symbol;Acc:HGNC:23116]	SENP2	3	185582496	185633551	1	protein_coding
ENSG00000165323	FAT atypical cadherin 3 [Source:HGNC Symbol;Acc:HGNC:23112]	FAT3	11	92352096	92896470	1	protein_coding
ENSG00000134640	melatonin receptor 1B [Source:HGNC Symbol;Acc:HGNC:7464]	MTNR1B	11	92969720	92985066	1	protein_coding
ENSG00000180773	solute carrier family 36 (proton/amino acid symporter), member 4 [Source:HGNC Symbol;Acc:HGNC:19660]	SLC36A4	11	93144171	93197964	-1	protein_coding
ENSG00000165325	coiled-coil domain containing 67 [Source:HGNC Symbol;Acc:HGNC:26344]	CCDC67	11	93329971	93438487	1	protein_coding
ENSG00000166002	single-pass membrane protein with coiled-coil domains 4 [Source:HGNC Symbol;Acc:HGNC:24810]	SMCO4	11	93478472	93543508	-1	protein_coding
ENSG00000166004	centrosomal protein 295kDa [Source:HGNC Symbol;Acc:HGNC:29366]	CEP295	11	93661639	93730358	1	protein_coding
ENSG00000166012	TATA-box binding protein associated factor, RNA polymerase I, D [Source:HGNC Symbol;Acc:HGNC:28759]	TAF1D	11	93729948	93784391	-1	protein_coding
ENSG00000182919	chromosome 11 open reading frame 54 [Source:HGNC Symbol;Acc:HGNC:30204]	C11orf54	11	93741591	93764749	1	protein_coding
ENSG00000042429	mediator complex subunit 17 [Source:HGNC Symbol;Acc:HGNC:2375]	MED17	11	93784227	93814695	1	protein_coding
ENSG00000214376	V-set and transmembrane domain containing 5 [Source:HGNC Symbol;Acc:HGNC:34443]	VSTM5	11	93818232	93850531	-1	protein_coding

## Sheet: Fasting.insulin.GWAS.ANOVA
Expression in Endocrine Cells	Number of Genes (out of 541 genes, from 33 SNP indices)	Gene Symbol
Beta	7	CCND2, SNX29, ECI2, CCDC53, GPN1, RAB18, CHL1
Delta	5	TCF7L2, GPAM, SPAG16, TENM3, CFI
Gamma	6	RAB3GAP2, IKZF2, TUBB2A, SERPINB9, ID3, GUCY1B3
Beta.Alpha.Delta	1	PNRC2
Beta.Alpha.Gamma	1	RIN2
Pan-Islet	40	AKAP13, GPBP1, VTI1A, IL6ST, SHISA9, RSL1D1, ANKRD10, PSMG4, RBM26, GPI, KIAA0355, RPS10, ATRAID, NUDT19, PDCD5, BPNT1, EPRS, MRPL33, YME1L1, OST4, TSC22D1, CCDC122, RSRP1, ATP5C1, SRRM1, SLC35F6, IFNLR1, RPL10A, SRSF10, NRBP1, RPL32, RPL11, ARHGAP5, ZBTB38, NUBPL, HNRNPR, SNRPC, PPP1R3B, MPHOSPH8, LINC00493
Lowly Expressed (Average Log2CPM < 2 across all islet cells)	352	RP11-767C1.1, AC087430.1, AC090044.2, LINC01266, AY269186.2, AY269186.1, LRRC70, IPO11, DIMT1, AGBL1, KLHL25, PRKCQ, RP11-563J2.3, PLEKHS1, PFKFB3, GALNT8, IL2RA, NRAP, AKAP3, HABP2, IL15RA, ACTBL2, DYRK4, RAD51AP1, PRDM14, SLCO5A1, FGF6, FGF23, TIGAR, SULF1, SETD9, TSPAN9, MAP3K1, C5orf67, CTC-236F12.4, TEAD4, ACSL5, TULP3, RHNO1, TECTB, FOXM1, ANKRD55, IL31RA, VWC2L, DDX4, SLC38A9, TNFRSF17, RP…
< 4-fold change	129	KIF2A, PDE8A, CASP7, RBM17, RP11-234B24.6, NDUFA9, TRAM1, NCOA2, C12orf4, FBXO18, PARP11, MIER3, ZDHHC6, CRACR2A, C8orf34, PRMT8, NRIP2, ITFG2, FKBP4, CPPED1, GSPT1, CSRNP3, ZC3H7A, TXNDC11, LITAF, CTD-3088G3.8, CLEC16A, COBLL1, ARHGEF7, CARS2, PRPF4B, NDFIP2, BPHL, SERPINB6, SERPINB1, WRNIP1, C6orf106, LSM14A, PEPD, CAD, C6orf1, GPATCH1, DTD1, SEC23B, RBBP9, FAAP24, CEP89, ACBD5, TDRD12, DRAM1, …

## Sheet: Fasting.insulin.GWAS.SNPs.Used
	DATE ADDED TO CATALOG	PUBMEDID	FIRST AUTHOR	DATE	JOURNAL	LINK	STUDY	DISEASE/TRAIT	INITIAL SAMPLE SIZE	REPLICATION SAMPLE SIZE	REGION	CHR_ID	CHR_POS	REPORTED GENE(S)	MAPPED_GENE	UPSTREAM_GENE_ID	DOWNSTREAM_GENE_ID	SNP_GENE_IDS	UPSTREAM_GENE_DISTANCE	DOWNSTREAM_GENE_DISTANCE	STRONGEST SNP-RISK ALLELE	SNPS	MERGED	SNP_ID_CURRENT	CONTEXT	INTERGENIC	RISK ALLELE FREQUENCY	P-VALUE	PVALUE_MLOG	P-VALUE (TEXT)	OR or BETA	95% CI (TEXT)	PLATFORM [SNPS PASSING QC]	CNV
7452	2010-02-28	20081858	Dupuis J	2010-01-17	Nat Genet	www.ncbi.nlm.nih.gov/pubmed/20081858	New genetic loci implicated in fasting glucose homeostasis and their impact on type 2 diabetes risk.	Fasting insulin-related traits	up to 38,238 European ancestry individuals	up to 62,264 European ancestry individuals	2p23.3	2	27518370	GCKR	GCKR	NA	NA	2646	NA	NA	rs780094-C	rs780094	NA	780094	intron_variant	0	0.62	4e-20	19.3979	(FI)			Affymetrix, Illumina [~ 2500000] (imputed)	N
7454	2010-02-28	20081858	Dupuis J	2010-01-17	Nat Genet	www.ncbi.nlm.nih.gov/pubmed/20081858	New genetic loci implicated in fasting glucose homeostasis and their impact on type 2 diabetes risk.	Fasting insulin-related traits	up to 38,238 European ancestry individuals	up to 62,264 European ancestry individuals	12q23.2	12	102481791	IGF1	IGF1 - LINC00485	3479	283432		5	327492	rs35767-G	rs35767	NA	35767	upstream_gene_variant	0	0.85	3e-08	7.52288	(FI)			Affymetrix, Illumina [~ 2500000] (imputed)	N
8197	2012-08-15	22581228	Manning AK	2012-05-13	Nat Genet	www.ncbi.nlm.nih.gov/pubmed/22581228	A genome-wide approach accounting for body mass index identifies genetic variants influencing fasting glycemic traits and insulin resistance.	Fasting insulin-related traits (interaction with BMI)	Up to 51,750 European ancestry individuals	Up to 33,823 European ancestry individuals	2q24.3	2	164694691	GRB14, COBLL1	COBLL1	NA	NA	22837	NA	NA	rs7607980-?	rs7607980	NA	7607980	missense_variant	0		4e-20	19.3979				Affymetrix, Illumina [~ 2400000] (imputed)	N
8198	2012-08-15	22581228	Manning AK	2012-05-13	Nat Genet	www.ncbi.nlm.nih.gov/pubmed/22581228	A genome-wide approach accounting for body mass index identifies genetic variants influencing fasting glycemic traits and insulin resistance.	Fasting insulin-related traits (interaction with BMI)	Up to 51,750 European ancestry individuals	Up to 33,823 European ancestry individuals	2q36.3	2	226203364	IRS1	LOC646736 - LOC105373913	646736	105373913		23302	80892	rs2943634-?	rs2943634	NA	2943634	intergenic_variant	0		2e-14	13.699				Affymetrix, Illumina [~ 2400000] (imputed)	N
8199	2012-08-15	22581228	Manning AK	2012-05-13	Nat Genet	www.ncbi.nlm.nih.gov/pubmed/22581228	A genome-wide approach accounting for body mass index identifies genetic variants influencing fasting glycemic traits and insulin resistance.	Fasting insulin-related traits (interaction with BMI)	Up to 51,750 European ancestry individuals	Up to 33,823 European ancestry individuals	4q32.1	4	156798972	PDGFC	PDGFC	NA	NA	56034	NA	NA	rs4691380-?	rs4691380	NA	4691380	intron_variant	0		5e-09	8.30103				Affymetrix, Illumina [~ 2400000] (imputed)	N
8200	2012-08-15	22581228	Manning AK	2012-05-13	Nat Genet	www.ncbi.nlm.nih.gov/pubmed/22581228	A genome-wide approach accounting for body mass index identifies genetic variants influencing fasting glycemic traits and insulin resistance.	Fasting insulin-related traits (interaction with BMI)	Up to 51,750 European ancestry individuals	Up to 33,823 European ancestry individuals	6p21.31	6	34877672	UHRF1BP1	UHRF1BP1 - TAF11	54887	6882		158	106	rs4646949-?	rs4646949	NA	4646949	intron_variant	0		4e-08	7.39794				Affymetrix, Illumina [~ 2400000] (imputed)	N
8201	2012-08-15	22581228	Manning AK	2012-05-13	Nat Genet	www.ncbi.nlm.nih.gov/pubmed/22581228	A genome-wide approach accounting for body mass index identifies genetic variants influencing fasting glycemic traits and insulin resistance.	Fasting insulin-related traits (interaction with BMI)	Up to 51,750 European ancestry individuals	Up to 33,823 European ancestry individuals	1q41	1	219527177	LYPLAL1	LOC102723886	NA	NA	102723886	NA	NA	rs2785980-?	rs2785980	NA	2785980	intergenic_variant	0		2e-08	7.69897				Affymetrix, Illumina [~ 2400000] (imputed)	N
8202	2012-08-15	22581228	Manning AK	2012-05-13	Nat Genet	www.ncbi.nlm.nih.gov/pubmed/22581228	A genome-wide approach accounting for body mass index identifies genetic variants influencing fasting glycemic traits and insulin resistance.	Fasting insulin-related traits (interaction with BMI)	Up to 51,750 European ancestry individuals	Up to 33,823 European ancestry individuals	8p23.1	8	9326086	PPP1R3B	LOC157273	NA	NA	157273	NA	NA	rs4841132-?	rs4841132	NA	4841132	non_coding_transcript_exon_variant	0		2e-10	9.69897				Affymetrix, Illumina [~ 2400000] (imputed)	N
8203	2012-08-15	22581228	Manning AK	2012-05-13	Nat Genet	www.ncbi.nlm.nih.gov/pubmed/22581228	A genome-wide approach accounting for body mass index identifies genetic variants influencing fasting glycemic traits and insulin resistance.	Fasting insulin-related traits (interaction with BMI)	Up to 51,750 European ancestry individuals	Up to 33,823 European ancestry individuals	19q13.11	19	33418804	PEPD	PEPD	NA	NA	5184	NA	NA	rs8182584-?	rs8182584	NA	8182584	intron_variant	0		9e-08	7.04576				Affymetrix, Illumina [~ 2400000] (imputed)	N
8204	2012-08-15	22581228	Manning AK	2012-05-13	Nat Genet	www.ncbi.nlm.nih.gov/pubmed/22581228	A genome-wide approach accounting for body mass index identifies genetic variants influencing fasting glycemic traits and insulin resistance.	Fasting insulin-related traits (interaction with BMI)	Up to 51,750 European ancestry individuals	Up to 33,823 European ancestry individuals	13q31.1	13	80049211	SPRY2	LOC101927216	NA	NA	101927216	NA	NA	rs7981942-?	rs7981942	NA	7981942	regulatory_region_variant	0		2e-06	5.69897				Affymetrix, Illumina [~ 2400000] (imputed)	N
8205	2012-08-15	22581228	Manning AK	2012-05-13	Nat Genet	www.ncbi.nlm.nih.gov/pubmed/22581228	A genome-wide approach accounting for body mass index identifies genetic variants influencing fasting glycemic traits and insulin resistance.	Fasting insulin-related traits (interaction with BMI)	Up to 51,750 European ancestry individuals	Up to 33,823 European ancestry individuals	3p26.3	3	67310	CHL1	LOC105376921, LOC105376920	NA	NA	105376921, 105376920	NA	NA	rs9841287-?	rs9841287	NA	9841287	intergenic_variant	0		7e-09	8.1549				Affymetrix, Illumina [~ 2400000] (imputed)	N
8206	2012-08-15	22581228	Manning AK	2012-05-13	Nat Genet	www.ncbi.nlm.nih.gov/pubmed/22581228	A genome-wide approach accounting for body mass index identifies genetic variants influencing fasting glycemic traits and insulin resistance.	Fasting insulin-related traits (interaction with BMI)	Up to 51,750 European ancestry individuals	Up to 33,823 European ancestry individuals	13q11	13	18737101	TUBA3C	CNN2P12 - LINC00417	100131550	100874164		9660	999	rs9552416-?	rs9552416	NA	9552416	downstream_gene_variant	0		3e-24	23.5229				Affymetrix, Illumina [~ 2400000] (imputed)	N
8207	2012-08-15	22581228	Manning AK	2012-05-13	Nat Genet	www.ncbi.nlm.nih.gov/pubmed/22581228	A genome-wide approach accounting for body mass index identifies genetic variants influencing fasting glycemic traits and insulin resistance.	Fasting insulin-related traits (interaction with BMI)	Up to 51,750 European ancestry individuals	Up to 33,823 European ancestry individuals	10p12.1	10	27404376	PTCHD3	PTCHD3	NA	NA	374308	NA	NA	rs1334893-?	rs1334893	NA	1334893	intron_variant	0		5e-06	5.30103				Affymetrix, Illumina [~ 2400000] (imputed)	N
8208	2012-08-15	22581228	Manning AK	2012-05-13	Nat Genet	www.ncbi.nlm.nih.gov/pubmed/22581228	A genome-wide approach accounting for body mass index identifies genetic variants influencing fasting glycemic traits and insulin resistance.	Fasting insulin-related traits (interaction with BMI)	Up to 51,750 European ancestry individuals	Up to 33,823 European ancestry individuals	8q13.2	8	69581739	SULF1	SULF1	NA	NA	23213	NA	NA	rs13273088-?	rs13273088	NA	13273088	intron_variant	0		7e-07	6.1549				Affymetrix, Illumina [~ 2400000] (imputed)	N
8209	2012-08-15	22581228	Manning AK	2012-05-13	Nat Genet	www.ncbi.nlm.nih.gov/pubmed/22581228	A genome-wide approach accounting for body mass index identifies genetic variants influencing fasting glycemic traits and insulin resistance.	Fasting insulin-related traits (interaction with BMI)	Up to 51,750 European ancestry individuals	Up to 33,823 European ancestry individuals	14q12	14	32738316	AKAP6	AKAP6	NA	NA	9472	NA	NA	rs2300835-?	rs2300835	NA	2300835	intron_variant	0		5e-07	6.30103				Affymetrix, Illumina [~ 2400000] (imputed)	N
8210	2012-08-15	22581228	Manning AK	2012-05-13	Nat Genet	www.ncbi.nlm.nih.gov/pubmed/22581228	A genome-wide approach accounting for body mass index identifies genetic variants influencing fasting glycemic traits and insulin resistance.	Fasting insulin-related traits (interaction with BMI)	Up to 51,750 European ancestry individuals	Up to 33,823 European ancestry individuals	1p36.11	1	24258000	GRHL3	LOC284632 - LOC105376871	284632	105376871		46310	47928	rs6670533-?	rs6670533	NA	6670533	intergenic_variant	0		6e-06	5.22185				Affymetrix, Illumina [~ 2400000] (imputed)	N
8211	2012-08-15	22581228	Manning AK	2012-05-13	Nat Genet	www.ncbi.nlm.nih.gov/pubmed/22581228	A genome-wide approach accounting for body mass index identifies genetic variants influencing fasting glycemic traits and insulin resistance.	Fasting insulin-related traits (interaction with BMI)	Up to 51,750 European ancestry individuals	Up to 33,823 European ancestry individuals	10p14	10	6904790	SFMBT2	LOC105376387	NA	NA	105376387	NA	NA	rs2501677-?	rs2501677	NA	2501677	intron_variant	0		3e-06	5.52288				Affymetrix, Illumina [~ 2400000] (imputed)	N
8212	2012-08-15	22581228	Manning AK	2012-05-13	Nat Genet	www.ncbi.nlm.nih.gov/pubmed/22581228	A genome-wide approach accounting for body mass index identifies genetic variants influencing fasting glycemic traits and insulin resistance.	Fasting insulin-related traits (interaction with BMI)	Up to 51,750 European ancestry individuals	Up to 33,823 European ancestry individuals	3p25.2	3	12075120	SYN2	SYN2	NA	NA	6854	NA	NA	rs308971-?	rs308971	NA	308971	intron_variant	0		2e-07	6.69897				Affymetrix, Illumina [~ 2400000] (imputed)	N
8586	2012-08-15	22581228	Manning AK	2012-05-13	Nat Genet	www.ncbi.nlm.nih.gov/pubmed/22581228	A genome-wide approach accounting for body mass index identifies genetic variants influencing fasting glycemic traits and insulin resistance.	Fasting insulin-related traits (interaction with BMI)	Up to 51,750 European ancestry individuals	Up to 33,823 European ancestry individuals	10q25.2	10	112998590	TCF7L2	TCF7L2	NA	NA	6934	NA	NA	rs7903146-?	rs7903146	NA	7903146	intron_variant	0	NR	3e-06	5.52288				Affymetrix, Illumina [~ 2400000] (imputed)	N
13166	2014-05-13	24204828	Zheng JS	2013-10-28	PLoS One	www.ncbi.nlm.nih.gov/pubmed/24204828	Genome-wide contribution of genotype by environment interaction to variation of diabetes-related traits.	Fasting insulin (interaction)	820 European ancestry individuals	NA	2q34	2	213683813	SPAG16	SPAG16	NA	NA	79582	NA	NA	rs6707387-A	rs6707387	NA	6707387	intron_variant	0	0.272	6e-07	6.22185	(Protein (control))			Affymetrix [590000]	N
13167	2014-05-13	24204828	Zheng JS	2013-10-28	PLoS One	www.ncbi.nlm.nih.gov/pubmed/24204828	Genome-wide contribution of genotype by environment interaction to variation of diabetes-related traits.	Fasting insulin (interaction)	820 European ancestry individuals	NA	3q23	3	140504952	CLSTN2	CLSTN2	NA	NA	64084	NA	NA	rs9862730-A	rs9862730	NA	9862730	intron_variant	0	0.109	3e-06	5.52288	(Carbohydrate)			Affymetrix [590000]	N
13168	2014-05-13	24204828	Zheng JS	2013-10-28	PLoS One	www.ncbi.nlm.nih.gov/pubmed/24204828	Genome-wide contribution of genotype by environment interaction to variation of diabetes-related traits.	Fasting insulin (interaction)	820 European ancestry individuals	NA	4q25	4	109806404	CFI, NOLA1	CFI - GAR1	3426	54433		4179	9106	rs4698790-T	rs4698790	NA	4698790	upstream_gene_variant	0	0.279	9e-06	5.04576	(Protein (control))			Affymetrix [590000]	N
13169	2014-05-13	24204828	Zheng JS	2013-10-28	PLoS One	www.ncbi.nlm.nih.gov/pubmed/24204828	Genome-wide contribution of genotype by environment interaction to variation of diabetes-related traits.	Fasting insulin (interaction)	820 European ancestry individuals	NA	4q34.3	4	181861392	LOC728191, LOC100128118	LOC105377574	NA	NA	105377574	NA	NA	rs10520514-A	rs10520514	NA	10520514	intergenic_variant	0	0.415	5e-06	5.30103	(Carbohydrate)			Affymetrix [590000]	N
13170	2014-05-13	24204828	Zheng JS	2013-10-28	PLoS One	www.ncbi.nlm.nih.gov/pubmed/24204828	Genome-wide contribution of genotype by environment interaction to variation of diabetes-related traits.	Fasting insulin (interaction)	820 European ancestry individuals	NA	5q11.2	5	56537692	LOC441073, MAP3K1	LOC101928448, LOC105378978	NA	NA	101928448, 105378978	NA	NA	rs30360-G	rs30360	NA	30360	non_coding_transcript_exon_variant	0	0.293	9e-07	6.04576	(Carbohydrate)			Affymetrix [590000]	N
13171	2014-05-13	24204828	Zheng JS	2013-10-28	PLoS One	www.ncbi.nlm.nih.gov/pubmed/24204828	Genome-wide contribution of genotype by environment interaction to variation of diabetes-related traits.	Fasting insulin (interaction)	820 European ancestry individuals	NA	5q12.1	5	62778891	HTR1A, ISCA1L	ISCA1P1 - LOC105378999	389293	105378999		1547	1104610	rs16891077-A	rs16891077	NA	16891077	upstream_gene_variant	0	0.209	9e-10	9.04576	(Carbohydrate)			Affymetrix [590000]	N
13172	2014-05-13	24204828	Zheng JS	2013-10-28	PLoS One	www.ncbi.nlm.nih.gov/pubmed/24204828	Genome-wide contribution of genotype by environment interaction to variation of diabetes-related traits.	Fasting insulin (interaction)	820 European ancestry individuals	NA	6p25.2	6	3307629	SLC22A23	SLC22A23	NA	NA	63027	NA	NA	rs9391988-A	rs9391988	NA	9391988	intron_variant	0	0.353	2e-06	5.69897	(Carbohydrate)			Affymetrix [590000]	N
13173	2014-05-13	24204828	Zheng JS	2013-10-28	PLoS One	www.ncbi.nlm.nih.gov/pubmed/24204828	Genome-wide contribution of genotype by environment interaction to variation of diabetes-related traits.	Fasting insulin (interaction)	820 European ancestry individuals	NA	10q23.1	10	81806930	LOC727960, NRG3	FARSBP1 - LOC105378388	647532	105378388		1028853	24232	rs9787485-T	rs9787485	NA	9787485	intergenic_variant	0	0.149	5e-08	7.30103	(Carbohydrate)			Affymetrix [590000]	N
13174	2014-05-13	24204828	Zheng JS	2013-10-28	PLoS One	www.ncbi.nlm.nih.gov/pubmed/24204828	Genome-wide contribution of genotype by environment interaction to variation of diabetes-related traits.	Fasting insulin (interaction)	820 European ancestry individuals	NA	12p13.32	12	3759002	EFCAB4B, PARP11	CRACR2A - PARP11	84766	57097		5802	49859	rs10744625-C	rs10744625	NA	10744625	intron_variant	0	0.188	8e-06	5.09691	(Carbohydrate)			Affymetrix [590000]	N
13175	2014-05-13	24204828	Zheng JS	2013-10-28	PLoS One	www.ncbi.nlm.nih.gov/pubmed/24204828	Genome-wide contribution of genotype by environment interaction to variation of diabetes-related traits.	Fasting insulin (interaction)	820 European ancestry individuals	NA	13q14.11	13	44128733	SERP2, LOC121838	LOC105370183, SMIM2-AS1	NA	NA	105370183, 101929212	NA	NA	rs9525916-T	rs9525916	NA	9525916	intron_variant	0	0.43	7e-06	5.1549	(Carbohydrate)			Affymetrix [590000]	N
13176	2014-05-13	24204828	Zheng JS	2013-10-28	PLoS One	www.ncbi.nlm.nih.gov/pubmed/24204828	Genome-wide contribution of genotype by environment interaction to variation of diabetes-related traits.	Fasting insulin (interaction)	820 European ancestry individuals	NA	13q34	13	111128713	ARHGEF7	ARHGEF7	NA	NA	8874	NA	NA	rs12853515-G	rs12853515	NA	12853515	intron_variant	0	0.14	4e-06	5.39794	(Carbohydrate)			Affymetrix [590000]	N
13177	2014-05-13	24204828	Zheng JS	2013-10-28	PLoS One	www.ncbi.nlm.nih.gov/pubmed/24204828	Genome-wide contribution of genotype by environment interaction to variation of diabetes-related traits.	Fasting insulin (interaction)	820 European ancestry individuals	NA	15q25.3	15	86117489	LOC100129082, AGBL1	AGBL1	NA	NA	123624	NA	NA	rs12914656-C	rs12914656	NA	12914656	upstream_gene_variant	0	0.114	2e-06	5.69897	(Carbohydrate)			Affymetrix [590000]	N
13178	2014-05-13	24204828	Zheng JS	2013-10-28	PLoS One	www.ncbi.nlm.nih.gov/pubmed/24204828	Genome-wide contribution of genotype by environment interaction to variation of diabetes-related traits.	Fasting insulin (interaction)	820 European ancestry individuals	NA	16p13.13	16	12091953	SNX29, FLJ32790	SNX29	NA	NA	92017	NA	NA	rs8048589-C	rs8048589	NA	8048589	intron_variant	0	0.181	4e-06	5.39794	(Protein (control))			Affymetrix [590000]	N
13179	2014-05-13	24204828	Zheng JS	2013-10-28	PLoS One	www.ncbi.nlm.nih.gov/pubmed/24204828	Genome-wide contribution of genotype by environment interaction to variation of diabetes-related traits.	Fasting insulin (interaction)	820 European ancestry individuals	NA	20p11.23	20	18905094	C20orf79, LOC100130062	C20orf78 - LOC105377058	100128496	105377058		74891	40645	rs742731-A	rs742731	NA	742731	intergenic_variant	0	0.407	2e-06	5.69897	(Carbohydrate)			Affymetrix [590000]	N

## Sheet: Fasting.insulin.Genes
	Description	Associated Gene Name	Chromosome Name	Gene Start (bp)	Gene End (bp)	Strand	Gene type
ENSG00000259831	long intergenic non-protein coding RNA 567 [Source:HGNC Symbol;Acc:HGNC:43711]	LINC00567	13	110809676	110813084	-1	lincRNA
ENSG00000225760	long intergenic non-protein coding RNA 431 [Source:HGNC Symbol;Acc:HGNC:42766]	LINC00431	13	110983307	110990564	1	lincRNA
ENSG00000225870	long intergenic non-protein coding RNA 368 [Source:HGNC Symbol;Acc:HGNC:42690]	LINC00368	13	111095838	111103097	1	lincRNA
ENSG00000226903	long intergenic non-protein coding RNA 354 [Source:HGNC Symbol;Acc:HGNC:42672]	LINC00354	13	111899985	111901176	1	lincRNA
ENSG00000260385		RP11-450H6.3	13	112083549	112085471	1	lincRNA
ENSG00000229520	long intergenic non-protein coding RNA 404 [Source:HGNC Symbol;Acc:HGNC:42734]	LINC00404	13	112106095	112106882	-1	lincRNA
ENSG00000224243	long intergenic non-protein coding RNA 403 [Source:HGNC Symbol;Acc:HGNC:42733]	LINC00403	13	112107119	112108015	1	lincRNA
ENSG00000229928	long intergenic non-protein coding RNA 400 [Source:HGNC Symbol;Acc:HGNC:42729]	LINC00400	13	43158631	43159466	1	lincRNA
ENSG00000233821	ENOX1 antisense RNA 1 [Source:HGNC Symbol;Acc:HGNC:42396]	ENOX1-AS1	13	43543918	43548056	1	lincRNA
ENSG00000233725	long intergenic non-protein coding RNA 284 [Source:HGNC Symbol;Acc:HGNC:26981]	LINC00284	13	43908669	44030461	1	lincRNA
ENSG00000226519	long intergenic non-protein coding RNA 390 [Source:HGNC Symbol;Acc:HGNC:42718]	LINC00390	13	44106378	44137236	-1	lincRNA
ENSG00000230731		RP11-478K15.6	13	44234118	44243192	-1	lincRNA
ENSG00000237361	tumor suppressor candidate 8 (non-protein coding) [Source:HGNC Symbol;Acc:HGNC:49111]	TUSC8	13	44400250	44405984	-1	lincRNA
ENSG00000237585	long intergenic non-protein coding RNA 407 [Source:HGNC Symbol;Acc:HGNC:42739]	LINC00407	13	44651812	44701016	1	lincRNA
ENSG00000235097	long intergenic non-protein coding RNA 330 [Source:HGNC Symbol;Acc:HGNC:42047]	LINC00330	13	44799503	44809630	-1	lincRNA
ENSG00000223732		RP11-321C24.1	13	44982077	45083125	-1	lincRNA
ENSG00000230010		RP4-568F9.6	20	18322552	18359300	-1	lincRNA
ENSG00000232388	long intergenic non-protein coding RNA 493 [Source:HGNC Symbol;Acc:HGNC:43430]	LINC00493	20	18567347	18569563	1	protein_coding
ENSG00000179935	long intergenic non-protein coding RNA 652 [Source:HGNC Symbol;Acc:HGNC:25003]	LINC00652	20	18786065	18794335	-1	lincRNA
ENSG00000233895		RP1-122P22.2	20	19757708	19809675	1	lincRNA
ENSG00000227676	long intergenic non-protein coding RNA 1068 [Source:HGNC Symbol;Acc:HGNC:49106]	LINC01068	13	79566727	79571436	1	lincRNA
ENSG00000229011	long intergenic non-protein coding RNA 1038 [Source:HGNC Symbol;Acc:HGNC:49026]	LINC01038	13	79804418	79805685	1	lincRNA
ENSG00000229175	long intergenic non-protein coding RNA 382 [Source:HGNC Symbol;Acc:HGNC:42709]	LINC00382	13	79872586	79917944	1	lincRNA
ENSG00000229246	long intergenic non-protein coding RNA 377 [Source:HGNC Symbol;Acc:HGNC:42703]	LINC00377	13	81043670	81044442	1	lincRNA
ENSG00000198033	tubulin alpha 3c [Source:HGNC Symbol;Acc:HGNC:12408]	TUBA3C	13	19173770	19181852	-1	protein_coding
ENSG00000132958	transmembrane phosphoinositide 3-phosphatase and tensin homolog 2 [Source:HGNC Symbol;Acc:HGNC:17299]	TPTE2	13	19422877	19536762	-1	protein_coding
ENSG00000196199	M-phase phosphoprotein 8 [Source:HGNC Symbol;Acc:HGNC:29810]	MPHOSPH8	13	19633681	19673459	1	protein_coding
ENSG00000121390	paraspeckle component 1 [Source:HGNC Symbol;Acc:HGNC:20320]	PSPC1	13	19674752	19783019	-1	protein_coding
ENSG00000173281	protein phosphatase 1 regulatory subunit 3B [Source:HGNC Symbol;Acc:HGNC:14942]	PPP1R3B	8	9136255	9151574	-1	protein_coding
ENSG00000253426		RP11-10A14.4	8	9151742	9168136	1	lincRNA
ENSG00000173273	tankyrase, TRF1-interacting ankyrin-related ADP-ribose polymerase [Source:HGNC Symbol;Acc:HGNC:11941]	TNKS	8	9555914	9782346	1	protein_coding
ENSG00000175806	methionine sulfoxide reductase A [Source:HGNC Symbol;Acc:HGNC:7377]	MSRA	8	10054268	10428891	1	protein_coding
ENSG00000260758		RP11-553E24.3	15	86078743	86079792	-1	lincRNA
ENSG00000260477	long intergenic non-protein coding RNA 1584 [Source:HGNC Symbol;Acc:HGNC:51426]	LINC01584	15	86083345	86116717	-1	lincRNA
ENSG00000259761		RP11-138H10.2	15	87042054	87047161	1	lincRNA
ENSG00000120251	glutamate receptor, ionotropic, AMPA 2 [Source:HGNC Symbol;Acc:HGNC:4572]	GRIA2	4	157204182	157366075	1	protein_coding
ENSG00000253505		CTA-398F10.1	8	8414690	8424632	-1	lincRNA
ENSG00000254153		CTA-398F10.2	8	8456909	8461337	-1	lincRNA
ENSG00000253343		CTD-3023L14.3	8	8555738	8560965	-1	lincRNA
ENSG00000253774		CTD-3023L14.1	8	8559894	8562124	1	lincRNA
ENSG00000253130		CTD-3023L14.2	8	8561391	8569688	1	lincRNA
ENSG00000254367		RP11-211C9.1	8	8723693	8782479	-1	lincRNA
ENSG00000253252		RP11-10A14.6	8	9180251	9182519	-1	lincRNA
ENSG00000248538		RP11-10A14.5	8	9189011	9202854	1	lincRNA
ENSG00000254235		RP11-115J16.1	8	9249417	9413714	1	lincRNA
ENSG00000253887		RP11-10A14.7	8	9255349	9260295	-1	lincRNA
ENSG00000253735		RP11-115J16.3	8	9351238	9358441	-1	lincRNA
ENSG00000254237		RP11-115J16.2	8	9371970	9436205	-1	lincRNA
ENSG00000253230	long intergenic non-protein coding RNA 599 [Source:HGNC Symbol;Acc:HGNC:27231]	LINC00599	8	9900064	9905366	-1	lincRNA
ENSG00000163793	DnaJ heat shock protein family (Hsp40) member C5 gamma [Source:HGNC Symbol;Acc:HGNC:24844]	DNAJC5G	2	27275421	27281499	1	protein_coding
ENSG00000182077	patched domain containing 3 [Source:HGNC Symbol;Acc:HGNC:24776]	PTCHD3	10	27398187	27414368	-1	protein_coding
ENSG00000246774		AC004051.2	4	109303035	109316135	1	lincRNA
ENSG00000196639	histamine receptor H1 [Source:HGNC Symbol;Acc:HGNC:5182]	HRH1	3	11137093	11263557	1	protein_coding
ENSG00000099246	RAB18, member RAS oncogene family [Source:HGNC Symbol;Acc:HGNC:14244]	RAB18	10	27504174	27542237	1	protein_coding
ENSG00000198879	Scm-like with four mbt domains 2 [Source:HGNC Symbol;Acc:HGNC:20256]	SFMBT2	10	7158624	7411486	-1	protein_coding
ENSG00000124562	small nuclear ribonucleoprotein polypeptide C [Source:HGNC Symbol;Acc:HGNC:11157]	SNRPC	6	34757406	34773794	1	protein_coding
ENSG00000233068		RP1-140K8.1	6	3893126	3894292	1	lincRNA
ENSG00000260604		RP1-140K8.5	6	3904920	3911979	-1	lincRNA
ENSG00000197548	autophagy related 7 [Source:HGNC Symbol;Acc:HGNC:16935]	ATG7	3	11272309	11557665	1	protein_coding
ENSG00000234817		RP3-400B16.1	6	4136072	4157385	1	lincRNA
ENSG00000237716		RP3-400B16.3	6	4186624	4188109	-1	lincRNA
ENSG00000250103		RP11-380D23.2	4	110595513	110615458	-1	lincRNA
ENSG00000249519	long intergenic non-protein coding RNA 1438 [Source:HGNC Symbol;Acc:HGNC:50757]	LINC01438	4	110794403	110797344	1	lincRNA
ENSG00000138100	tripartite motif containing 54 [Source:HGNC Symbol;Acc:HGNC:16008]	TRIM54	2	27282392	27307439	1	protein_coding
ENSG00000198924	DNA cross-link repair 1A [Source:HGNC Symbol;Acc:HGNC:17660]	DCLRE1A	10	113834725	113854383	-1	protein_coding
ENSG00000065060	UHRF1 binding protein 1 [Source:HGNC Symbol;Acc:HGNC:21216]	UHRF1BP1	6	34792015	34883138	1	protein_coding
ENSG00000163794	urocortin [Source:HGNC Symbol;Acc:HGNC:12516]	UCN	2	27307400	27308445	-1	protein_coding
ENSG00000196865	NHL repeat containing 2 [Source:HGNC Symbol;Acc:HGNC:24731]	NHLRC2	10	113854661	113917194	1	protein_coding
ENSG00000115204	MpV17 mitochondrial inner membrane protein [Source:HGNC Symbol;Acc:HGNC:7224]	MPV17	2	27309492	27325680	-1	protein_coding
ENSG00000248197	long intergenic non-protein coding RNA 290 [Source:HGNC Symbol;Acc:HGNC:38515]	LINC00290	4	181064089	181159149	-1	lincRNA
ENSG00000249460		RP11-665C14.2	4	181261161	181265029	-1	lincRNA
ENSG00000251336		RP11-540E16.2	4	181820019	181829973	-1	lincRNA
ENSG00000237844		AC092684.1	2	163749573	164352223	-1	lincRNA
ENSG00000144560	vestigial like family member 4 [Source:HGNC Symbol;Acc:HGNC:28966]	VGLL4	3	11556070	11771350	-1	protein_coding
ENSG00000064995	TATA-box binding protein associated factor 11 [Source:HGNC Symbol;Acc:HGNC:11544]	TAF11	6	34877778	34888089	-1	protein_coding
ENSG00000225561		RP11-412H9.2	1	218912757	218916184	-1	lincRNA
ENSG00000223842		RP11-135J2.3	1	219222248	219225497	-1	lincRNA
ENSG00000228536		RP11-392O17.1	1	219409681	219411941	-1	lincRNA
ENSG00000230024		RP11-95P13.1	1	219435152	219442642	-1	lincRNA
ENSG00000238232		RP11-95P13.2	1	219557192	219557701	1	lincRNA
ENSG00000226927		RP11-302I18.3	1	220359731	220360183	-1	lincRNA
ENSG00000260505		RP11-410C4.5	1	220401122	220404033	1	lincRNA
ENSG00000064999	ankyrin repeat and sterile alpha motif domain containing 1A [Source:HGNC Symbol;Acc:HGNC:20961]	ANKS1A	6	34889265	35091413	1	protein_coding
ENSG00000231529		RP11-410C4.4	1	220485104	220487043	-1	lincRNA
ENSG00000261326	long intergenic non-protein coding RNA 1355 [Source:HGNC Symbol;Acc:HGNC:50584]	LINC01355	1	23281309	23286752	-1	lincRNA
ENSG00000123243	inter-alpha-trypsin inhibitor heavy chain family member 5 [Source:HGNC Symbol;Acc:HGNC:21449]	ITIH5	10	7559270	7666998	-1	protein_coding
ENSG00000235052		RP1-150O5.3	1	23549139	23550915	-1	lincRNA
ENSG00000230023		RP11-10N16.2	1	24200240	24211693	1	lincRNA
ENSG00000264443		RP4-594I10.3	1	24538802	24556024	-1	lincRNA
ENSG00000261025		RP11-84D1.2	1	24968423	24970865	-1	lincRNA
ENSG00000233755		RP4-799D16.1	1	25043707	25113120	-1	lincRNA
ENSG00000234308		AC093381.2	2	212795331	212819264	1	lincRNA
ENSG00000150051	mohawk homeobox [Source:HGNC Symbol;Acc:HGNC:23729]	MKX	10	27672875	27746060	-1	protein_coding
ENSG00000169126	armadillo repeat containing 4 [Source:HGNC Symbol;Acc:HGNC:25583]	ARMC4	10	27812164	27999048	-1	protein_coding
ENSG00000114115	retinol binding protein 1 [Source:HGNC Symbol;Acc:HGNC:9919]	RBP1	3	139517434	139539829	-1	protein_coding
ENSG00000144559	TAM41 mitochondrial translocator assembly and maintenance homolog [Source:HGNC Symbol;Acc:HGNC:25187]	TAMM41	3	11790442	11846919	-1	protein_coding
ENSG00000223373		AC108066.1	2	212911003	212919809	1	lincRNA
ENSG00000236193		RP11-105N14.3	2	213155806	213167712	-1	lincRNA
ENSG00000196096		AC079610.2	2	213276552	213284205	-1	lincRNA
ENSG00000163864	nicotinamide nucleotide adenylyltransferase 3 [Source:HGNC Symbol;Acc:HGNC:20989]	NMNAT3	3	139560180	139678017	-1	protein_coding
ENSG00000124678	t-complex 11, testis-specific [Source:HGNC Symbol;Acc:HGNC:11658]	TCP11	6	35118071	35148610	-1	protein_coding
ENSG00000157150	TIMP metallopeptidase inhibitor 4 [Source:HGNC Symbol;Acc:HGNC:11823]	TIMP4	3	12153051	12159351	-1	protein_coding
ENSG00000115207	general transcription factor IIIC subunit 2 [Source:HGNC Symbol;Acc:HGNC:4665]	GTF3C2	2	27325849	27357034	-1	protein_coding
ENSG00000132170	peroxisome proliferator-activated receptor gamma [Source:HGNC Symbol;Acc:HGNC:9236]	PPARG	3	12287368	12434356	1	protein_coding
ENSG00000166211	Spi-C transcription factor (Spi-1/PU.1 related) [Source:HGNC Symbol;Acc:HGNC:29549]	SPIC	12	101475421	101486997	1	protein_coding
ENSG00000254337		RP11-865I6.2	8	68848742	68852763	-1	lincRNA
ENSG00000253658	long intergenic non-protein coding RNA 1592 [Source:HGNC Symbol;Acc:HGNC:51557]	LINC01592	8	68911803	69104190	-1	lincRNA
ENSG00000253373		RP11-21C17.1	8	69175579	69178189	-1	lincRNA
ENSG00000253479	long intergenic non-protein coding RNA 1603 [Source:HGNC Symbol;Acc:HGNC:51652]	LINC01603	8	69425035	69448244	-1	lincRNA
ENSG00000253143		RP11-333A23.3	8	70471112	70480623	-1	lincRNA
ENSG00000253967		RP11-333A23.4	8	70471134	70485687	1	lincRNA
ENSG00000150054	membrane protein, palmitoylated 7 [Source:HGNC Symbol;Acc:HGNC:26542]	MPP7	10	28050993	28334486	-1	protein_coding
ENSG00000144460	neuronal tyrosine-phosphorylated phosphoinositide-3-kinase adaptor 2 [Source:HGNC Symbol;Acc:HGNC:29291]	NYAP2	2	225400648	225654018	1	protein_coding
ENSG00000249346	long intergenic non-protein coding RNA 1016 [Source:HGNC Symbol;Acc:HGNC:48991]	LINC01016	6	33867506	33896914	-1	lincRNA
ENSG00000158258	calsyntenin 2 [Source:HGNC Symbol;Acc:HGNC:17448]	CLSTN2	3	139935185	140577397	1	protein_coding
ENSG00000169047	insulin receptor substrate 1 [Source:HGNC Symbol;Acc:HGNC:6125]	IRS1	2	226731317	226799759	-1	protein_coding
ENSG00000233183		RP3-468B3.2	6	33893323	33927631	1	lincRNA
ENSG00000144468	rhomboid domain containing 1 [Source:HGNC Symbol;Acc:HGNC:23081]	RHBDD1	2	226835581	226999215	1	protein_coding
ENSG00000134121	cell adhesion molecule L1-like [Source:HGNC Symbol;Acc:HGNC:1939]	CHL1	3	196596	409417	1	protein_coding
ENSG00000228559		RP3-340B19.3	6	35544632	35545669	1	lincRNA
ENSG00000249236		CTD-2227I18.1	5	56059050	56067372	1	lincRNA
ENSG00000249697		RP11-155L15.1	5	56313905	56321397	-1	lincRNA
ENSG00000228650		AC008940.1	5	56770799	56772303	1	lincRNA
ENSG00000154743	tRNA splicing endonuclease subunit 2 [Source:HGNC Symbol;Acc:HGNC:28422]	TSEN2	3	12484432	12539623	1	protein_coding
ENSG00000081052	collagen, type IV, alpha 4 [Source:HGNC Symbol;Acc:HGNC:2206]	COL4A4	2	227002711	227164113	-1	protein_coding
ENSG00000169031	collagen, type IV, alpha 3 (Goodpasture antigen) [Source:HGNC Symbol;Acc:HGNC:2204]	COL4A3	2	227164565	227314792	1	protein_coding
ENSG00000155890	tripartite motif containing 42 [Source:HGNC Symbol;Acc:HGNC:19014]	TRIM42	3	140678039	140701150	1	protein_coding
ENSG00000232784		AC067961.1	2	225399710	225400588	1	lincRNA
ENSG00000235070		AC068138.1	2	226180044	226185371	-1	lincRNA
ENSG00000114120	solute carrier family 25 (pyrimidine nucleotide carrier), member 36 [Source:HGNC Symbol;Acc:HGNC:25554]	SLC25A36	3	140941830	140979933	1	protein_coding
ENSG00000263033		RP11-396B14.2	16	11196177	11224969	1	lincRNA
ENSG00000061918	guanylate cyclase 1, soluble, beta 3 [Source:HGNC Symbol;Acc:HGNC:4687]	GUCY1B3	4	155758992	155807591	1	protein_coding
ENSG00000248199		CTD-2244C20.2	5	61878109	61886129	1	lincRNA
ENSG00000196091	myosin binding protein C, slow type [Source:HGNC Symbol;Acc:HGNC:7549]	MYBPC1	12	101568353	101686018	1	protein_coding
ENSG00000115211	eukaryotic translation initiation factor 2B subunit delta [Source:HGNC Symbol;Acc:HGNC:3260]	EIF2B4	2	27364352	27370486	-1	protein_coding
ENSG00000256394	acid sensing ion channel subunit family member 5 [Source:HGNC Symbol;Acc:HGNC:17537]	ASIC5	4	155829729	155866273	-1	protein_coding
ENSG00000262117	breast cancer anti-estrogen resistance 4 (non-protein coding) [Source:HGNC Symbol;Acc:HGNC:22170]	BCAR4	16	11819829	11828845	-1	lincRNA
ENSG00000175093	splA/ryanodine receptor domain and SOCS box containing 4 [Source:HGNC Symbol;Acc:HGNC:30630]	SPSB4	3	141051402	141148611	1	protein_coding
ENSG00000151790	tryptophan 2,3-dioxygenase [Source:HGNC Symbol;Acc:HGNC:11708]	TDO2	4	155854738	155920406	1	protein_coding
ENSG00000256043	cathepsin O [Source:HGNC Symbol;Acc:HGNC:2542]	CTSO	4	155924118	155953917	-1	protein_coding
ENSG00000225526	MKRN2 opposite strand [Source:HGNC Symbol;Acc:HGNC:40375]	MKRN2OS	3	12514934	12561059	-1	protein_coding
ENSG00000251283		RP11-171N4.2	4	156634494	156642454	-1	lincRNA
ENSG00000145431	platelet derived growth factor C [Source:HGNC Symbol;Acc:HGNC:8801]	PDGFC	4	156760454	156971394	-1	protein_coding
ENSG00000075975	makorin ring finger protein 2 [Source:HGNC Symbol;Acc:HGNC:7113]	MKRN2	3	12557014	12583713	1	protein_coding
ENSG00000155893	2-phosphoxylose phosphatase 1 [Source:HGNC Symbol;Acc:HGNC:26303]	PXYLP1	3	141228726	141294906	1	protein_coding
ENSG00000132155	Raf-1 proto-oncogene, serine/threonine kinase [Source:HGNC Symbol;Acc:HGNC:9829]	RAF1	3	12583601	12664226	-1	protein_coding
ENSG00000109738	glycine receptor beta [Source:HGNC Symbol;Acc:HGNC:4329]	GLRB	4	157076057	157172090	1	protein_coding
ENSG00000115234	sorting nexin 17 [Source:HGNC Symbol;Acc:HGNC:14979]	SNX17	2	27370496	27377533	1	protein_coding
ENSG00000125944	heterogeneous nuclear ribonucleoprotein R [Source:HGNC Symbol;Acc:HGNC:5047]	HNRNPR	1	23303771	23344336	-1	protein_coding
ENSG00000125945	zinc finger protein 436 [Source:HGNC Symbol;Acc:HGNC:20814]	ZNF436	1	23359448	23369442	-1	protein_coding
ENSG00000251511		RP11-171N4.1	4	156585979	156590039	1	lincRNA
ENSG00000248912		RP11-171N4.4	4	156686664	156692636	1	lincRNA
ENSG00000234111		RP11-364P22.1	4	157572490	157576154	1	lincRNA
ENSG00000204219	transcription elongation factor A (SII), 3 [Source:HGNC Symbol;Acc:HGNC:11615]	TCEA3	1	23381061	23424740	-1	protein_coding
ENSG00000249275		RP11-364P22.2	4	157637687	157667044	1	lincRNA
ENSG00000151413	nucleotide binding protein-like [Source:HGNC Symbol;Acc:HGNC:20278]	NUBPL	14	31489956	31861224	1	protein_coding
ENSG00000177311	zinc finger and BTB domain containing 38 [Source:HGNC Symbol;Acc:HGNC:26636]	ZBTB38	3	141324213	141449792	1	protein_coding
ENSG00000088280	ArfGAP with SH3 domain, ankyrin repeat and PH domain 3 [Source:HGNC Symbol;Acc:HGNC:14987]	ASAP3	1	23428563	23484568	-1	protein_coding
ENSG00000146197	signal peptide, CUB domain, EGF-like 3 [Source:HGNC Symbol;Acc:HGNC:13655]	SCUBE3	6	35214419	35253079	1	protein_coding
ENSG00000088726	transmembrane protein 40 [Source:HGNC Symbol;Acc:HGNC:25620]	TMEM40	3	12733525	12769457	-1	protein_coding
ENSG00000267475		CTD-2538C1.2	19	32687089	32691750	-1	lincRNA
ENSG00000267567		CTD-2538C1.3	19	32718298	32719595	-1	lincRNA
ENSG00000267130		CTD-2540B15.9	19	33305036	33309387	1	lincRNA
ENSG00000266985		CTD-2329C7.2	19	33555568	33557470	1	lincRNA
ENSG00000065029	zinc finger protein 76 [Source:HGNC Symbol;Acc:HGNC:13149]	ZNF76	6	35258909	35295985	1	protein_coding
ENSG00000258474		RP11-187E13.1	14	31944853	31950382	1	lincRNA
ENSG00000258386		RP11-187E13.2	14	32006902	32018685	1	lincRNA
ENSG00000188517	collagen, type XXV, alpha 1 [Source:HGNC Symbol;Acc:HGNC:18603]	COL25A1	4	108810721	109302657	-1	protein_coding
ENSG00000100852	Rho GTPase activating protein 5 [Source:HGNC Symbol;Acc:HGNC:675]	ARHGAP5	14	32076114	32159728	1	protein_coding
ENSG00000258308		RP11-554E23.2	12	101954998	101962390	-1	lincRNA
ENSG00000007968	E2F transcription factor 2 [Source:HGNC Symbol;Acc:HGNC:3114]	E2F2	1	23506430	23531220	-1	protein_coding
ENSG00000117318	inhibitor of DNA binding 3, dominant negative helix-loop-helix protein [Source:HGNC Symbol;Acc:HGNC:5362]	ID3	1	23557918	23559794	-1	protein_coding
ENSG00000197880	myelodysplastic syndrome 2 translocation associated [Source:HGNC Symbol;Acc:HGNC:29633]	MDS2	1	23581495	23640568	1	protein_coding
ENSG00000144712	cullin-associated and neddylation-dissociated 2 (putative) [Source:HGNC Symbol;Acc:HGNC:30689]	CAND2	3	12796472	12871916	1	protein_coding
ENSG00000142676	ribosomal protein L11 [Source:HGNC Symbol;Acc:HGNC:10301]	RPL11	1	23691779	23696425	1	protein_coding
ENSG00000151320	A-kinase anchoring protein 6 [Source:HGNC Symbol;Acc:HGNC:376]	AKAP6	14	32329273	32837681	1	protein_coding
ENSG00000258169	long intergenic non-protein coding RNA 485 [Source:HGNC Symbol;Acc:HGNC:27476]	LINC00485	12	102809280	102824399	-1	lincRNA
ENSG00000138802	SEC24 homolog B, COPII coat complex component [Source:HGNC Symbol;Acc:HGNC:10704]	SEC24B	4	109433772	109540896	1	protein_coding
ENSG00000151322	neuronal PAS domain protein 3 [Source:HGNC Symbol;Acc:HGNC:19311]	NPAS3	14	32934933	33804176	1	protein_coding
ENSG00000144713	ribosomal protein L32 [Source:HGNC Symbol;Acc:HGNC:10336]	RPL32	3	12834485	12841588	-1	protein_coding
ENSG00000011007	transcription elongation factor B (SIII), polypeptide 3 (110kDa, elongin A) [Source:HGNC Symbol;Acc:HGNC:11620]	TCEB3	1	23743155	23762059	1	protein_coding
ENSG00000057757	PITH (C-terminal proteasome-interacting domain of thioredoxin-like) domain containing 1 [Source:HGNC Symbol;Acc:HGNC:25022]	PITHD1	1	23778405	23788232	1	protein_coding
ENSG00000005059	coiled-coil domain containing 109B [Source:HGNC Symbol;Acc:HGNC:26076]	CCDC109B	4	109560205	109688726	1	protein_coding
ENSG00000115155	otoferlin [Source:HGNC Symbol;Acc:HGNC:8515]	OTOF	2	26457203	26558698	-1	protein_coding
ENSG00000011009	lysophospholipase II [Source:HGNC Symbol;Acc:HGNC:6738]	LYPLA2	1	23790970	23795539	1	protein_coding
ENSG00000163795	zinc finger protein 513 [Source:HGNC Symbol;Acc:HGNC:26498]	ZNF513	2	27377231	27380790	-1	protein_coding
ENSG00000138794	caspase 6 [Source:HGNC Symbol;Acc:HGNC:1507]	CASP6	4	109688622	109703583	-1	protein_coding
ENSG00000144711	IQ motif and Sec7 domain 1 [Source:HGNC Symbol;Acc:HGNC:29112]	IQSEC1	3	12897220	13073117	-1	protein_coding
ENSG00000123739	phospholipase A2 group XIIA [Source:HGNC Symbol;Acc:HGNC:18554]	PLA2G12A	4	109709989	109730077	-1	protein_coding
ENSG00000115241	protein phosphatase, Mg2+/Mn2+ dependent 1G [Source:HGNC Symbol;Acc:HGNC:9278]	PPM1G	2	27381194	27409687	-1	protein_coding
ENSG00000117308	UDP-galactose-4-epimerase [Source:HGNC Symbol;Acc:HGNC:4116]	GALE	1	23795599	23800804	-1	protein_coding
ENSG00000151655	inter-alpha-trypsin inhibitor heavy chain 2 [Source:HGNC Symbol;Acc:HGNC:6167]	ITIH2	10	7703269	7749520	1	protein_coding
ENSG00000155903	RAS p21 protein activator 2 [Source:HGNC Symbol;Acc:HGNC:9872]	RASA2	3	141487047	141615342	1	protein_coding
ENSG00000115216	nuclear receptor binding protein 1 [Source:HGNC Symbol;Acc:HGNC:7993]	NRBP1	2	27427790	27442259	1	protein_coding
ENSG00000023892	DEF6, guanine nucleotide exchange factor [Source:HGNC Symbol;Acc:HGNC:2760]	DEF6	6	35297852	35321771	1	protein_coding
ENSG00000205403	complement factor I [Source:HGNC Symbol;Acc:HGNC:5394]	CFI	4	109740694	109802179	-1	protein_coding
ENSG00000117305	3-hydroxymethyl-3-methylglutaryl-CoA lyase [Source:HGNC Symbol;Acc:HGNC:5005]	HMGCL	1	23801885	23838620	-1	protein_coding
ENSG00000179163	fucosidase, alpha-L- 1, tissue [Source:HGNC Symbol;Acc:HGNC:4006]	FUCA1	1	23845077	23868294	-1	protein_coding
ENSG00000109534	GAR1 homolog, ribonucleoprotein [Source:HGNC Symbol;Acc:HGNC:14264]	GAR1	4	109815510	109824740	1	protein_coding
ENSG00000188822	cannabinoid receptor 2 [Source:HGNC Symbol;Acc:HGNC:2160]	CNR2	1	23870526	23913362	-1	protein_coding
ENSG00000189266	proline rich nuclear receptor coactivator 2 [Source:HGNC Symbol;Acc:HGNC:23158]	PNRC2	1	23959109	23963462	1	protein_coding
ENSG00000180245	retinal pigment epithelium-derived rhodopsin homolog [Source:HGNC Symbol;Acc:HGNC:10450]	RRH	4	109827994	109844604	1	protein_coding
ENSG00000183423	leucine-rich repeat, immunoglobulin-like and transmembrane domains 3 [Source:HGNC Symbol;Acc:HGNC:24783]	LRIT3	4	109848202	109872315	1	protein_coding
ENSG00000188529	serine/arginine-rich splicing factor 10 [Source:HGNC Symbol;Acc:HGNC:16713]	SRSF10	1	23964804	23980927	-1	protein_coding
ENSG00000138798	epidermal growth factor [Source:HGNC Symbol;Acc:HGNC:3229]	EGF	4	109912884	110012266	1	protein_coding
ENSG00000112033	peroxisome proliferator-activated receptor delta [Source:HGNC Symbol;Acc:HGNC:9235]	PPARD	6	35342558	35428191	1	protein_coding
ENSG00000157992	keratinocyte associated protein 3 [Source:HGNC Symbol;Acc:HGNC:28943]	KRTCAP3	2	27442366	27446481	1	protein_coding
ENSG00000112039	Fanconi anemia complementation group E [Source:HGNC Symbol;Acc:HGNC:3586]	FANCE	6	35452361	35467103	1	protein_coding
ENSG00000261763		RP11-442N1.2	3	139678620	139682564	-1	lincRNA
ENSG00000250543		RP11-442N1.1	3	139688403	139689342	-1	lincRNA
ENSG00000251471		RP11-166D18.1	3	139837220	139859894	1	lincRNA
ENSG00000198755	ribosomal protein L10a [Source:HGNC Symbol;Acc:HGNC:10299]	RPL10A	6	35468408	35470785	1	protein_coding
ENSG00000261826		RP11-691G17.1	3	140865075	140867783	-1	lincRNA
ENSG00000142661	myomesin 3 [Source:HGNC Symbol;Acc:HGNC:26679]	MYOM3	1	24056035	24112175	-1	protein_coding
ENSG00000007866	TEA domain family member 3 [Source:HGNC Symbol;Acc:HGNC:11716]	TEAD3	6	35473597	35497076	-1	protein_coding
ENSG00000173557	chromosome 2 open reading frame 70 [Source:HGNC Symbol;Acc:HGNC:27938]	C2orf70	2	26562582	26579532	1	protein_coding
ENSG00000138002	intraflagellar transport 172 [Source:HGNC Symbol;Acc:HGNC:30391]	IFT172	2	27444371	27489789	-1	protein_coding
ENSG00000142677	interleukin 22 receptor subunit alpha 1 [Source:HGNC Symbol;Acc:HGNC:13700]	IL22RA1	1	24119771	24143121	-1	protein_coding
ENSG00000185436	interferon, lambda receptor 1 [Source:HGNC Symbol;Acc:HGNC:18584]	IFNLR1	1	24154157	24187959	-1	protein_coding
ENSG00000112041	tubby like protein 1 [Source:HGNC Symbol;Acc:HGNC:12423]	TULP1	6	35497874	35512938	-1	protein_coding
ENSG00000170522	ELOVL fatty acid elongase 6 [Source:HGNC Symbol;Acc:HGNC:15829]	ELOVL6	4	110045846	110199199	-1	protein_coding
ENSG00000158055	grainyhead-like transcription factor 3 [Source:HGNC Symbol;Acc:HGNC:25839]	GRHL3	1	24319322	24364482	1	protein_coding
ENSG00000138792	glutamyl aminopeptidase (aminopeptidase A) [Source:HGNC Symbol;Acc:HGNC:3355]	ENPEP	4	110365733	110565285	1	protein_coding
ENSG00000151657	Kin17 DNA and RNA binding protein [Source:HGNC Symbol;Acc:HGNC:6327]	KIN	10	7750962	7787981	-1	protein_coding
ENSG00000001460	sperm-tail PG-rich repeat containing 1 [Source:HGNC Symbol;Acc:HGNC:28070]	STPG1	1	24356999	24416934	-1	protein_coding
ENSG00000157884	calcium and integrin binding family member 4 [Source:HGNC Symbol;Acc:HGNC:33703]	CIB4	2	26581202	26641368	-1	protein_coding
ENSG00000171303	potassium channel, two pore domain subfamily K, member 3 [Source:HGNC Symbol;Acc:HGNC:6278]	KCNK3	2	26692690	26733420	1	protein_coding
ENSG00000213699	solute carrier family 35 member F6 [Source:HGNC Symbol;Acc:HGNC:26055]	SLC35F6	2	26764284	26781231	1	protein_coding
ENSG00000077420	amyloid beta (A4) precursor protein-binding, family B, member 1 interacting protein [Source:HGNC Symbol;Acc:HGNC:17379]	APBB1IP	10	26438203	26567803	1	protein_coding
ENSG00000001461	NIPA-like domain containing 3 [Source:HGNC Symbol;Acc:HGNC:25233]	NIPAL3	1	24415794	24472976	1	protein_coding
ENSG00000164093	paired-like homeodomain 2 [Source:HGNC Symbol;Acc:HGNC:9005]	PITX2	4	110617423	110642123	-1	protein_coding
ENSG00000115163	centromere protein A [Source:HGNC Symbol;Acc:HGNC:1851]	CENPA	2	26764289	26801067	1	protein_coding
ENSG00000117602	RCAN family member 3 [Source:HGNC Symbol;Acc:HGNC:3042]	RCAN3	1	24502351	24541040	1	protein_coding
ENSG00000096060	FK506 binding protein 5 [Source:HGNC Symbol;Acc:HGNC:3721]	FKBP5	6	35573585	35728583	-1	protein_coding
ENSG00000227938		AC104695.4	2	28448167	28450184	-1	lincRNA
ENSG00000157851	dihydropyrimidinase like 5 [Source:HGNC Symbol;Acc:HGNC:20637]	DPYSL5	2	26847747	26950351	1	protein_coding
ENSG00000184454	non-compact myelin associated protein [Source:HGNC Symbol;Acc:HGNC:29332]	NCMAP	1	24556111	24609328	1	protein_coding
ENSG00000133226	serine/arginine repetitive matrix 1 [Source:HGNC Symbol;Acc:HGNC:16638]	SRRM1	1	24631716	24673267	1	protein_coding
ENSG00000148459	prenyl (decaprenyl) diphosphate synthase, subunit 1 [Source:HGNC Symbol;Acc:HGNC:17759]	PDSS1	10	26697659	26746798	1	protein_coding
ENSG00000165629	ATP synthase, H+ transporting, mitochondrial F1 complex, gamma polypeptide 1 [Source:HGNC Symbol;Acc:HGNC:833]	ATP5C1	10	7788129	7807815	1	protein_coding
ENSG00000169504	chloride intracellular channel 4 [Source:HGNC Symbol;Acc:HGNC:13518]	CLIC4	1	24745357	24844324	1	protein_coding
ENSG00000157343	armadillo repeat containing 12 [Source:HGNC Symbol;Acc:HGNC:21099]	ARMC12	6	35737032	35749079	1	protein_coding
ENSG00000084764	microtubule associated protein RP/EB family member 3 [Source:HGNC Symbol;Acc:HGNC:6892]	MAPRE3	2	26970612	27027196	1	protein_coding
ENSG00000196748	colipase like 2 [Source:HGNC Symbol;Acc:HGNC:21250]	CLPSL2	6	35776594	35779552	1	protein_coding
ENSG00000204140	colipase like 1 [Source:HGNC Symbol;Acc:HGNC:21251]	CLPSL1	6	35781017	35793675	1	protein_coding
ENSG00000119777	transmembrane protein 214 [Source:HGNC Symbol;Acc:HGNC:25983]	TMEM214	2	27032910	27041695	1	protein_coding
ENSG00000136754	abl interactor 1 [Source:HGNC Symbol;Acc:HGNC:11320]	ABI1	10	26746593	26861087	-1	protein_coding
ENSG00000115226	fibronectin type III domain containing 4 [Source:HGNC Symbol;Acc:HGNC:20239]	FNDC4	2	27491883	27495245	-1	protein_coding
ENSG00000084734	glucokinase (hexokinase 4) regulator [Source:HGNC Symbol;Acc:HGNC:4196]	GCKR	2	27496842	27523684	1	protein_coding
ENSG00000020633	runt-related transcription factor 3 [Source:HGNC Symbol;Acc:HGNC:10473]	RUNX3	1	24899511	24965121	-1	protein_coding
ENSG00000117614	SYF2 pre-mRNA-splicing factor [Source:HGNC Symbol;Acc:HGNC:19824]	SYF2	1	25222679	25232502	-1	protein_coding
ENSG00000137392	colipase [Source:HGNC Symbol;Acc:HGNC:2085]	CLPS	6	35794982	35797344	-1	protein_coding
ENSG00000197753	lipoma HMGIC fusion partner-like 5 [Source:HGNC Symbol;Acc:HGNC:21253]	LHFPL5	6	35805293	35833874	1	protein_coding
ENSG00000233438		AC109829.1	2	27537386	27567144	1	protein_coding
ENSG00000221843	chromosome 2 open reading frame 16 [Source:HGNC Symbol;Acc:HGNC:25275]	C2orf16	2	27576522	27582720	1	protein_coding
ENSG00000243943	zinc finger protein 512 [Source:HGNC Symbol;Acc:HGNC:29380]	ZNF512	2	27582969	27623215	1	protein_coding
ENSG00000084693	ATP/GTP binding protein-like 5 [Source:HGNC Symbol;Acc:HGNC:26147]	AGBL5	2	27042364	27070622	1	protein_coding
ENSG00000218336	teneurin transmembrane protein 3 [Source:HGNC Symbol;Acc:HGNC:29944]	TENM3	4	182143987	182803024	1	protein_coding
ENSG00000096063	SRSF protein kinase 1 [Source:HGNC Symbol;Acc:HGNC:11305]	SRPK1	6	35832966	35921342	-1	protein_coding
ENSG00000111666	choline phosphotransferase 1 [Source:HGNC Symbol;Acc:HGNC:17852]	CHPT1	12	101696947	101744140	1	protein_coding
ENSG00000117616	arginine/serine-rich protein 1 [Source:HGNC Symbol;Acc:HGNC:25234]	RSRP1	1	25242237	25338213	-1	protein_coding
ENSG00000120658	ecto-NOX disulfide-thiol exchanger 1 [Source:HGNC Symbol;Acc:HGNC:25474]	ENOX1	13	43213518	43786908	-1	protein_coding
ENSG00000151773	coiled-coil domain containing 122 [Source:HGNC Symbol;Acc:HGNC:26478]	CCDC122	13	43823909	43879727	-1	protein_coding
ENSG00000179630	laccase (multicopper oxidoreductase) domain containing 1 [Source:HGNC Symbol;Acc:HGNC:26789]	LACC1	13	43879284	43893932	1	protein_coding
ENSG00000250903	GMDS antisense RNA 1 (head to head) [Source:HGNC Symbol;Acc:HGNC:48993]	GMDS-AS1	6	2245748	2482022	1	lincRNA
ENSG00000139656	small integral membrane protein 2 [Source:HGNC Symbol;Acc:HGNC:28776]	SMIM2	13	44143543	44161257	-1	protein_coding
ENSG00000151778	stress-associated endoplasmic reticulum protein family member 2 [Source:HGNC Symbol;Acc:HGNC:20607]	SERP2	13	44373665	44397714	1	protein_coding
ENSG00000228718		RP11-145H9.3	6	2636936	2640001	1	lincRNA
ENSG00000230438	serpin peptidase inhibitor, clade B (ovalbumin), member 9, pseudogene 1 [Source:HGNC Symbol;Acc:HGNC:28590]	SERPINB9P1	6	2854657	2881407	-1	lincRNA
ENSG00000257472		RP11-159D23.2	14	31925801	31930146	-1	lincRNA
ENSG00000102804	TSC22 domain family member 1 [Source:HGNC Symbol;Acc:HGNC:16826]	TSC22D1	13	44432143	44577147	-1	protein_coding
ENSG00000228365		RP1-90J20.2	6	2916894	2917733	1	lincRNA
ENSG00000244041	long intergenic non-protein coding RNA 1011 [Source:HGNC Symbol;Acc:HGNC:33812]	LINC01011	6	2987967	2991173	1	lincRNA
ENSG00000229282		RP1-40E16.2	6	3055890	3056761	1	lincRNA
ENSG00000230269		RP1-40E16.9	6	3182744	3195756	-1	lincRNA
ENSG00000228793		RP1-223B1.1	6	3594247	3624747	-1	lincRNA
ENSG00000083635	nuclear fragile X mental retardation protein interacting protein 1 [Source:HGNC Symbol;Acc:HGNC:8057]	NUFIP1	13	44939249	44989483	-1	protein_coding
ENSG00000133114	GPALPP motifs containing 1 [Source:HGNC Symbol;Acc:HGNC:20298]	GPALPP1	13	44989529	45037669	1	protein_coding
ENSG00000188342	general transcription factor IIF subunit 2 [Source:HGNC Symbol;Acc:HGNC:4653]	GTF2F2	13	45120515	45284909	1	protein_coding
ENSG00000107890	ankyrin repeat domain 26 [Source:HGNC Symbol;Acc:HGNC:29186]	ANKRD26	10	26991914	27100498	-1	protein_coding
ENSG00000228474	oligosaccharyltransferase complex subunit 4 (non-catalytic) [Source:HGNC Symbol;Acc:HGNC:32483]	OST4	2	27070472	27071773	-1	protein_coding
ENSG00000176714	coiled-coil domain containing 121 [Source:HGNC Symbol;Acc:HGNC:25833]	CCDC121	2	27625639	27629012	-1	protein_coding
ENSG00000165632	TATA-box binding protein associated factor 3 [Source:HGNC Symbol;Acc:HGNC:17303]	TAF3	10	7818504	8016627	1	protein_coding
ENSG00000198522	GPN-loop GTPase 1 [Source:HGNC Symbol;Acc:HGNC:17030]	GPN1	2	27628247	27651508	1	protein_coding
ENSG00000138080	elastin microfibril interfacer 1 [Source:HGNC Symbol;Acc:HGNC:19880]	EMILIN1	2	27078567	27086408	1	protein_coding
ENSG00000185737	neuregulin 3 [Source:HGNC Symbol;Acc:HGNC:7999]	NRG3	10	81875314	82987179	1	protein_coding
ENSG00000138030	ketohexokinase [Source:HGNC Symbol;Acc:HGNC:6315]	KHK	2	27086747	27100772	1	protein_coding
ENSG00000139351	synaptonemal complex protein 3 [Source:HGNC Symbol;Acc:HGNC:18130]	SYCP3	12	101728648	101739472	-1	protein_coding
ENSG00000111670	N-acetylglucosamine-1-phosphate transferase, alpha and beta subunits [Source:HGNC Symbol;Acc:HGNC:29670]	GNPTAB	12	101745497	101830938	-1	protein_coding
ENSG00000138028	cell growth regulator with EF-hand domain 1 [Source:HGNC Symbol;Acc:HGNC:16962]	CGREF1	2	27098889	27119115	-1	protein_coding
ENSG00000119760	SPT7-like STAGA complex gamma subunit [Source:HGNC Symbol;Acc:HGNC:30632]	SUPT7L	2	27650812	27663840	-1	protein_coding
ENSG00000163798	solute carrier family 4 (anion exchanger), member 1, adaptor protein [Source:HGNC Symbol;Acc:HGNC:13813]	SLC4A1AP	2	27663471	27694976	1	protein_coding
ENSG00000136758	YME1 like 1 ATPase [Source:HGNC Symbol;Acc:HGNC:12843]	YME1L1	10	27110112	27155266	-1	protein_coding
ENSG00000143994	abhydrolase domain containing 1 [Source:HGNC Symbol;Acc:HGNC:17553]	ABHD1	2	27123789	27130812	1	protein_coding
ENSG00000205334	long intergenic non-protein coding RNA 1460 [Source:HGNC Symbol;Acc:HGNC:50858]	LINC01460	2	27705786	27715732	-1	lincRNA
ENSG00000243147	mitochondrial ribosomal protein L33 [Source:HGNC Symbol;Acc:HGNC:14487]	MRPL33	2	27771717	27988087	1	protein_coding
ENSG00000171174	ribokinase [Source:HGNC Symbol;Acc:HGNC:30325]	RBKS	2	27781364	27891098	-1	protein_coding
ENSG00000138073	prolactin regulatory element binding [Source:HGNC Symbol;Acc:HGNC:9356]	PREB	2	27130756	27134675	-1	protein_coding
ENSG00000143353	lysophospholipase-like 1 [Source:HGNC Symbol;Acc:HGNC:20440]	LYPLAL1	1	219173844	219212865	1	protein_coding
ENSG00000158019	brain and reproductive organ-expressed (TNFRSF1A modulator) [Source:HGNC Symbol;Acc:HGNC:1106]	BRE	2	27889941	28338901	1	protein_coding
ENSG00000089006	sorting nexin 5 [Source:HGNC Symbol;Acc:HGNC:14969]	SNX5	20	17941597	17968980	-1	protein_coding
ENSG00000196660	solute carrier family 30 member 10 [Source:HGNC Symbol;Acc:HGNC:25355]	SLC30A10	1	219685427	219958647	-1	protein_coding
ENSG00000136628	glutamyl-prolyl-tRNA synthetase [Source:HGNC Symbol;Acc:HGNC:3418]	EPRS	1	219968601	220046658	-1	protein_coding
ENSG00000178904	dpy-19-like 3 (C. elegans) [Source:HGNC Symbol;Acc:HGNC:27120]	DPY19L3	19	32405543	32485895	1	protein_coding
ENSG00000162813	3'(2'), 5'-bisphosphate nucleotidase 1 [Source:HGNC Symbol;Acc:HGNC:1096]	BPNT1	1	220057482	220090462	-1	protein_coding
ENSG00000125850	ovo-like zinc finger 2 [Source:HGNC Symbol;Acc:HGNC:15804]	OVOL2	20	17956979	18059188	-1	protein_coding
ENSG00000120539	microtubule associated serine/threonine kinase like [Source:HGNC Symbol;Acc:HGNC:19042]	MASTL	10	27154824	27186924	1	protein_coding
ENSG00000125871	mitochondrial genome maintenance exonuclease 1 [Source:HGNC Symbol;Acc:HGNC:16205]	MGME1	20	17968913	17991122	1	protein_coding
ENSG00000232838	PET117 homolog [Source:HGNC Symbol;Acc:HGNC:40045]	PET117	20	18137873	18143169	1	protein_coding
ENSG00000067704	isoleucyl-tRNA synthetase 2, mitochondrial [Source:HGNC Symbol;Acc:HGNC:29685]	IARS2	1	220094102	220148041	1	protein_coding
ENSG00000149474	CSRP2 binding protein [Source:HGNC Symbol;Acc:HGNC:15904]	CSRP2BP	20	18138118	18188387	1	protein_coding
ENSG00000186143	proline rich 30 [Source:HGNC Symbol;Acc:HGNC:28677]	PRR30	2	27136848	27139410	-1	protein_coding
ENSG00000105185	programmed cell death 5 [Source:HGNC Symbol;Acc:HGNC:8764]	PDCD5	19	32581068	32587452	1	protein_coding
ENSG00000163792	transcription factor 23 [Source:HGNC Symbol;Acc:HGNC:18602]	TCF23	2	27149004	27156974	1	protein_coding
ENSG00000118873	RAB3 GTPase activating non-catalytic protein subunit 2 [Source:HGNC Symbol;Acc:HGNC:17168]	RAB3GAP2	1	220148293	220272454	-1	protein_coding
ENSG00000138074	solute carrier family 5 (sodium/multivitamin and iodide cotransporter), member 6 [Source:HGNC Symbol;Acc:HGNC:11041]	SLC5A6	2	27199587	27212958	-1	protein_coding
ENSG00000075426	FOS-like antigen 2 [Source:HGNC Symbol;Acc:HGNC:3798]	FOSL2	2	28392448	28417312	1	protein_coding
ENSG00000105186	ankyrin repeat domain 27 [Source:HGNC Symbol;Acc:HGNC:25310]	ANKRD27	19	32597007	32676597	-1	protein_coding
ENSG00000124493	glutamate receptor, metabotropic 4 [Source:HGNC Symbol;Acc:HGNC:4596]	GRM4	6	34018645	34155622	-1	protein_coding
ENSG00000125846	zinc finger protein 133 [Source:HGNC Symbol;Acc:HGNC:12917]	ZNF133	20	18288283	18316996	1	protein_coding
ENSG00000163803	phospholipase B1 [Source:HGNC Symbol;Acc:HGNC:30041]	PLB1	2	28457145	28643788	1	protein_coding
ENSG00000089091	double zinc ribbon and ankyrin repeat domains 1 [Source:HGNC Symbol;Acc:HGNC:15858]	DZANK1	20	18383367	18467281	-1	protein_coding
ENSG00000186326	regulator of G-protein signaling 9 binding protein [Source:HGNC Symbol;Acc:HGNC:30304]	RGS9BP	19	32675407	32678300	1	protein_coding
ENSG00000136048	DNA damage regulated autophagy modulator 1 [Source:HGNC Symbol;Acc:HGNC:25645]	DRAM1	12	101877351	102012130	1	protein_coding
ENSG00000213965	nudix hydrolase 19 [Source:HGNC Symbol;Acc:HGNC:32036]	NUDT19	19	32691961	32713796	1	protein_coding
ENSG00000173809	tudor domain containing 12 [Source:HGNC Symbol;Acc:HGNC:25044]	TDRD12	19	32719753	32829580	1	protein_coding
ENSG00000107897	acyl-CoA binding domain containing 5 [Source:HGNC Symbol;Acc:HGNC:23338]	ACBD5	10	27195214	27242130	-1	protein_coding
ENSG00000132664	polymerase (RNA) III (DNA directed) polypeptide F, 39 kDa [Source:HGNC Symbol;Acc:HGNC:15763]	POLR3F	20	18467127	18484643	1	protein_coding
ENSG00000120860	coiled-coil domain containing 53 [Source:HGNC Symbol;Acc:HGNC:24256]	CCDC53	12	102012927	102062149	-1	protein_coding
ENSG00000021488	solute carrier family 7 (amino acid transporter light chain, bo,+ system), member 9 [Source:HGNC Symbol;Acc:HGNC:11067]	SLC7A9	19	32830509	32869766	-1	protein_coding
ENSG00000121289	centrosomal protein 89kDa [Source:HGNC Symbol;Acc:HGNC:25907]	CEP89	19	32875925	32971991	-1	protein_coding
ENSG00000137309	high mobility group AT-hook 1 [Source:HGNC Symbol;Acc:HGNC:5010]	HMGA1	6	34236873	34246231	1	protein_coding
ENSG00000131944	Fanconi anemia core complex associated protein 24 [Source:HGNC Symbol;Acc:HGNC:28467]	FAAP24	19	32972209	32978222	1	protein_coding
ENSG00000131941	rhophilin, Rho GTPase binding protein 2 [Source:HGNC Symbol;Acc:HGNC:19974]	RHPN2	19	32978593	33064888	-1	protein_coding
ENSG00000089050	retinoblastoma binding protein 9 [Source:HGNC Symbol;Acc:HGNC:9892]	RBBP9	20	18486540	18497243	-1	protein_coding
ENSG00000075188	nucleoporin 37kDa [Source:HGNC Symbol;Acc:HGNC:29929]	NUP37	12	102073103	102120124	-1	protein_coding
ENSG00000101310	Sec23 homolog B, COPII coat complex component [Source:HGNC Symbol;Acc:HGNC:10702]	SEC23B	20	18507493	18561415	1	protein_coding
ENSG00000125821	D-tyrosyl-tRNA deacylase 1 [Source:HGNC Symbol;Acc:HGNC:16219]	DTD1	20	18567453	18763917	1	protein_coding
ENSG00000076650	G-patch domain containing 1 [Source:HGNC Symbol;Acc:HGNC:24658]	GPATCH1	19	33080880	33130542	1	protein_coding
ENSG00000132631	SCP2 sterol-binding domain containing 1 [Source:HGNC Symbol;Acc:HGNC:16211]	SCP2D1	20	18813726	18814392	1	protein_coding
ENSG00000185052	solute carrier family 24 (sodium/potassium/calcium exchanger), member 3 [Source:HGNC Symbol;Acc:HGNC:10977]	SLC24A3	20	19212646	19722937	1	protein_coding
ENSG00000138085	all-trans retinoic acid induced differentiation factor [Source:HGNC Symbol;Acc:HGNC:24090]	ATRAID	2	27212027	27217178	1	protein_coding
ENSG00000186577	chromosome 6 open reading frame 1 [Source:HGNC Symbol;Acc:HGNC:1340]	C6orf1	6	34246380	34249470	-1	protein_coding
ENSG00000268628		RP1-122P22.4	20	19756390	19758037	-1	lincRNA
ENSG00000132669	Ras and Rab interactor 2 [Source:HGNC Symbol;Acc:HGNC:18750]	RIN2	20	19886521	20002457	1	protein_coding
ENSG00000185480	PARP1 binding protein [Source:HGNC Symbol;Acc:HGNC:26074]	PARPBP	12	102120185	102197520	1	protein_coding
ENSG00000124614	ribosomal protein S10 [Source:HGNC Symbol;Acc:HGNC:10383]	RPS10	6	34417454	34426125	-1	protein_coding
ENSG00000084774	carbamoyl-phosphate synthetase 2, aspartate transcarbamylase, and dihydroorotase [Source:HGNC Symbol;Acc:HGNC:1424]	CAD	2	27217390	27243943	1	protein_coding
ENSG00000166359	WD repeat domain 88 [Source:HGNC Symbol;Acc:HGNC:26999]	WDR88	19	33132090	33175795	1	protein_coding
ENSG00000215244		RP11-563J2.2	10	6277687	6335982	1	lincRNA
ENSG00000130881	LDL receptor related protein 3 [Source:HGNC Symbol;Acc:HGNC:6695]	LRP3	19	33177603	33208867	1	protein_coding
ENSG00000225948		RP11-554I8.1	10	6618716	6625346	1	lincRNA
ENSG00000223784		RP11-554I8.2	10	6737382	6739026	1	lincRNA
ENSG00000238266	long intergenic non-protein coding RNA 707 [Source:HGNC Symbol;Acc:HGNC:44691]	LINC00707	10	6779598	6842906	1	lincRNA
ENSG00000234248		RP11-799O21.2	10	6891457	6920472	-1	lincRNA
ENSG00000130876	solute carrier family 7 (neutral amino acid transporter light chain, asc system), member 10 [Source:HGNC Symbol;Acc:HGNC:11058]	SLC7A10	19	33208664	33225850	-1	protein_coding
ENSG00000223581		RP11-393K12.2	10	7097152	7097675	1	lincRNA
ENSG00000232591		RP5-1031D4.2	10	7445558	7471942	-1	lincRNA
ENSG00000245848	CCAAT/enhancer binding protein (C/EBP), alpha [Source:HGNC Symbol;Acc:HGNC:1833]	CEBPA	19	33299934	33302564	-1	protein_coding
ENSG00000153879	CCAAT/enhancer binding protein (C/EBP), gamma [Source:HGNC Symbol;Acc:HGNC:1837]	CEBPG	19	33373330	33382686	1	protein_coding
ENSG00000124299	peptidase D [Source:HGNC Symbol;Acc:HGNC:8840]	PEPD	19	33386950	33521794	-1	protein_coding
ENSG00000124507	protein kinase C and casein kinase substrate in neurons 1 [Source:HGNC Symbol;Acc:HGNC:8570]	PACSIN1	6	34466061	34535231	1	protein_coding
ENSG00000124302	carbohydrate (N-acetylgalactosamine 4-0) sulfotransferase 8 [Source:HGNC Symbol;Acc:HGNC:15993]	CHST8	19	33621955	33773509	1	protein_coding
ENSG00000153885	potassium channel tetramerization domain containing 15 [Source:HGNC Symbol;Acc:HGNC:23297]	KCTD15	19	33795933	33815763	1	protein_coding
ENSG00000115194	solute carrier family 30 (zinc transporter), member 3 [Source:HGNC Symbol;Acc:HGNC:11014]	SLC30A3	2	27253684	27275817	-1	protein_coding
ENSG00000124664	SAM pointed domain containing ETS transcription factor [Source:HGNC Symbol;Acc:HGNC:17257]	SPDEF	6	34537802	34556333	-1	protein_coding
ENSG00000257103	LSM14A mRNA processing body assembly factor [Source:HGNC Symbol;Acc:HGNC:24489]	LSM14A	19	34172504	34229515	1	protein_coding
ENSG00000196821	chromosome 6 open reading frame 106 [Source:HGNC Symbol;Acc:HGNC:21215]	C6orf106	6	34587288	34696859	-1	protein_coding
ENSG00000166398	KIAA0355 [Source:HGNC Symbol;Acc:HGNC:29016]	KIAA0355	19	34254537	34355586	1	protein_coding
ENSG00000105220	glucose-6-phosphate isomerase [Source:HGNC Symbol;Acc:HGNC:4458]	GPI	19	34359480	34402156	1	protein_coding
ENSG00000164385	long intergenic non-protein coding RNA 1600 [Source:HGNC Symbol;Acc:HGNC:21600]	LINC01600	6	2621913	2634603	-1	lincRNA
ENSG00000145949	myosin light chain kinase family member 4 [Source:HGNC Symbol;Acc:HGNC:27972]	MYLK4	6	2663629	2750966	-1	protein_coding
ENSG00000183395	pro-melanin concentrating hormone [Source:HGNC Symbol;Acc:HGNC:9109]	PMCH	12	102196459	102197845	-1	protein_coding
ENSG00000266953		RP11-618P17.4	19	34396315	34409364	1	protein_coding
ENSG00000126249	programmed cell death 2-like [Source:HGNC Symbol;Acc:HGNC:28194]	PDCD2L	19	34404384	34426168	1	protein_coding
ENSG00000124535	Werner helicase interacting protein 1 [Source:HGNC Symbol;Acc:HGNC:20876]	WRNIP1	6	2765414	2786952	1	protein_coding
ENSG00000021355	serpin peptidase inhibitor, clade B (ovalbumin), member 1 [Source:HGNC Symbol;Acc:HGNC:3311]	SERPINB1	6	2832332	2842006	-1	protein_coding
ENSG00000017427	insulin like growth factor 1 [Source:HGNC Symbol;Acc:HGNC:5464]	IGF1	12	102395867	102480645	-1	protein_coding
ENSG00000170542	serpin peptidase inhibitor, clade B (ovalbumin), member 9 [Source:HGNC Symbol;Acc:HGNC:8955]	SERPINB9	6	2887266	2903280	-1	protein_coding
ENSG00000171759	phenylalanine hydroxylase [Source:HGNC Symbol;Acc:HGNC:8582]	PAH	12	102836885	102958410	-1	protein_coding
ENSG00000124570	serpin peptidase inhibitor, clade B (ovalbumin), member 6 [Source:HGNC Symbol;Acc:HGNC:8950]	SERPINB6	6	2948159	2972165	-1	protein_coding
ENSG00000124588	NAD(P)H dehydrogenase, quinone 2 [Source:HGNC Symbol;Acc:HGNC:7856]	NQO2	6	2987987	3028869	1	protein_coding
ENSG00000137275	receptor interacting serine/threonine kinase 1 [Source:HGNC Symbol;Acc:HGNC:10019]	RIPK1	6	3063991	3115187	1	protein_coding
ENSG00000139746	RNA binding motif protein 26 [Source:HGNC Symbol;Acc:HGNC:20327]	RBM26	13	79311824	79406477	-1	protein_coding
ENSG00000236894		RP11-128B16.3	10	26577676	26579095	-1	lincRNA
ENSG00000233261	long intergenic non-protein coding RNA 264 [Source:HGNC Symbol;Acc:HGNC:17776]	LINC00264	10	26589865	26594330	1	lincRNA
ENSG00000137274	biphenyl hydrolase-like (serine hydrolase) [Source:HGNC Symbol;Acc:HGNC:1094]	BPHL	6	3118374	3153578	1	protein_coding
ENSG00000102471	Nedd4 family interacting protein 2 [Source:HGNC Symbol;Acc:HGNC:18537]	NDFIP2	13	79481124	79556075	1	protein_coding
ENSG00000234296		RP13-16H11.7	10	26643228	26645016	1	lincRNA
ENSG00000231976	long intergenic non-protein coding RNA 202-2 [Source:HGNC Symbol;Acc:HGNC:44917]	LINC00202-2	10	26647986	26653454	1	lincRNA
ENSG00000227932		RP13-16H11.2	10	26664206	26676159	-1	lincRNA
ENSG00000136158	sprouty RTK signaling antagonist 2 [Source:HGNC Symbol;Acc:HGNC:11270]	SPRY2	13	80335976	80340951	-1	protein_coding
ENSG00000139352	achaete-scute family bHLH transcription factor 1 [Source:HGNC Symbol;Acc:HGNC:738]	ASCL1	12	102957686	102960516	1	protein_coding
ENSG00000232224	long intergenic non-protein coding RNA 202-1 [Source:HGNC Symbol;Acc:HGNC:24672]	LINC00202-1	10	26931206	26942001	-1	lincRNA
ENSG00000236983	long intergenic non-protein coding RNA 614 [Source:HGNC Symbol;Acc:HGNC:30165]	LINC00614	10	26943323	26944418	-1	lincRNA
ENSG00000257860		RP11-552I14.1	12	103151842	103168309	1	lincRNA
ENSG00000262412		RP11-85G18.6	10	27243130	27250804	1	lincRNA
ENSG00000179088	chromosome 12 open reading frame 42 [Source:HGNC Symbol;Acc:HGNC:24729]	C12orf42	12	103237591	103496010	-1	protein_coding
ENSG00000260151		RP11-748L13.6	10	27343436	27344917	1	lincRNA
ENSG00000233472		RP11-218D6.4	10	27999788	28049615	1	lincRNA
ENSG00000137267	tubulin beta 2A class IIa [Source:HGNC Symbol;Acc:HGNC:12412]	TUBB2A	6	3153669	3157526	-1	protein_coding
ENSG00000137285	tubulin beta 2B class IIb [Source:HGNC Symbol;Acc:HGNC:30829]	TUBB2B	6	3224261	3231730	-1	protein_coding
ENSG00000253958	claudin 23 [Source:HGNC Symbol;Acc:HGNC:17591]	CLDN23	8	8701938	8704106	1	protein_coding
ENSG00000147324	malignant fibrous histiocytoma amplified sequence 1 [Source:HGNC Symbol;Acc:HGNC:16982]	MFHAS1	8	8783354	8893645	-1	protein_coding
ENSG00000104626	exoribonuclease 1 [Source:HGNC Symbol;Acc:HGNC:23994]	ERI1	8	9002147	9116746	1	protein_coding
ENSG00000180822	proteasome (prosome, macropain) assembly chaperone 4 [Source:HGNC Symbol;Acc:HGNC:21108]	PSMG4	6	3231403	3303373	1	protein_coding
ENSG00000137266	solute carrier family 22 member 23 [Source:HGNC Symbol;Acc:HGNC:21106]	SLC22A23	6	3268962	3457022	-1	protein_coding
ENSG00000168994	PX domain containing 1 [Source:HGNC Symbol;Acc:HGNC:21361]	PXDC1	6	3722614	3752026	-1	protein_coding
ENSG00000256150		RP11-885B4.1	12	2742626	2771908	-1	lincRNA
ENSG00000255669		RP11-885B4.2	12	2761200	2770455	-1	lincRNA
ENSG00000145945	family with sequence similarity 50 member B [Source:HGNC Symbol;Acc:HGNC:18789]	FAM50B	6	3849386	3851317	1	protein_coding
ENSG00000112739	pre-mRNA processing factor 4B [Source:HGNC Symbol;Acc:HGNC:17346]	PRPF4B	6	4021267	4064983	1	protein_coding
ENSG00000250770		RP5-1063M23.1	12	3296202	3300224	-1	lincRNA
ENSG00000236908		RP5-1063M23.2	12	3318718	3325343	1	lincRNA
ENSG00000257048		RP11-476M19.2	12	3367833	3371346	1	lincRNA
ENSG00000256969		RP11-320N7.2	12	4020977	4026658	1	lincRNA
ENSG00000255474		RP11-234B24.2	12	4700417	4720102	-1	lincRNA
ENSG00000145975	family with sequence similarity 217 member A [Source:HGNC Symbol;Acc:HGNC:21362]	FAM217A	6	4049434	4087344	-1	protein_coding
ENSG00000185689	chromosome 6 open reading frame 201 [Source:HGNC Symbol;Acc:HGNC:21620]	C6orf201	6	4079209	4130951	1	protein_coding
ENSG00000187498	collagen, type IV, alpha 1 [Source:HGNC Symbol;Acc:HGNC:2202]	COL4A1	13	110148963	110307149	-1	protein_coding
ENSG00000134871	collagen, type IV, alpha 2 [Source:HGNC Symbol;Acc:HGNC:2203]	COL4A2	13	110305812	110513027	1	protein_coding
ENSG00000139832	RAB20, member RAS oncogene family [Source:HGNC Symbol;Acc:HGNC:18260]	RAB20	13	110523066	110561733	-1	protein_coding
ENSG00000213995	carbohydrate kinase domain containing [Source:HGNC Symbol;Acc:HGNC:25576]	CARKD	13	110615460	110639993	1	protein_coding
ENSG00000198721	enoyl-CoA delta isomerase 2 [Source:HGNC Symbol;Acc:HGNC:14601]	ECI2	6	4115689	4135597	-1	protein_coding
ENSG00000134905	cysteinyl-tRNA synthetase 2, mitochondrial (putative) [Source:HGNC Symbol;Acc:HGNC:25695]	CARS2	13	110641412	110713603	-1	protein_coding
ENSG00000153487	inhibitor of growth family member 1 [Source:HGNC Symbol;Acc:HGNC:6062]	ING1	13	110712736	110723339	1	protein_coding
ENSG00000255874	long intergenic non-protein coding RNA 346 [Source:HGNC Symbol;Acc:HGNC:27492]	LINC00346	13	110863987	110870251	-1	lincRNA
ENSG00000088448	ankyrin repeat domain 10 [Source:HGNC Symbol;Acc:HGNC:20265]	ANKRD10	13	110878540	110915069	-1	protein_coding
ENSG00000102606	Rho guanine nucleotide exchange factor 7 [Source:HGNC Symbol;Acc:HGNC:15607]	ARHGEF7	13	111114559	111305737	1	protein_coding
ENSG00000153495	testis expressed 29 [Source:HGNC Symbol;Acc:HGNC:20370]	TEX29	13	111316184	111344249	1	protein_coding
ENSG00000204398		RP11-65D24.2	13	111588201	111672608	1	lincRNA
ENSG00000182968	SRY-box 1 [Source:HGNC Symbol;Acc:HGNC:11189]	SOX1	13	112067647	112070488	1	protein_coding
ENSG00000182263	fidgetin [Source:HGNC Symbol;Acc:HGNC:13285]	FIGN	2	163593396	163736012	-1	protein_coding
ENSG00000115290	growth factor receptor bound protein 14 [Source:HGNC Symbol;Acc:HGNC:4565]	GRB14	2	164492812	164621848	-1	protein_coding
ENSG00000082438	cordon-bleu WH2 repeat protein like 1 [Source:HGNC Symbol;Acc:HGNC:23571]	COBLL1	2	164653624	164843679	-1	protein_coding
ENSG00000169507	solute carrier family 38 member 11 [Source:HGNC Symbol;Acc:HGNC:26836]	SLC38A11	2	164896186	164955525	-1	protein_coding
ENSG00000038532	C-type lectin domain family 16 member A [Source:HGNC Symbol;Acc:HGNC:29013]	CLEC16A	16	10944488	11182189	1	protein_coding
ENSG00000175643	RecQ mediated genome instability 2 [Source:HGNC Symbol;Acc:HGNC:28349]	RMI2	16	11249619	11351762	1	protein_coding
ENSG00000185338	suppressor of cytokine signaling 1 [Source:HGNC Symbol;Acc:HGNC:19383]	SOCS1	16	11254405	11256179	-1	protein_coding
ENSG00000178279	transition protein 2 (during histone to protamine replacement) [Source:HGNC Symbol;Acc:HGNC:11952]	TNP2	16	11267748	11269533	-1	protein_coding
ENSG00000178257	protamine 3 [Source:HGNC Symbol;Acc:HGNC:13732]	PRM3	16	11273218	11273641	-1	protein_coding
ENSG00000122304	protamine 2 [Source:HGNC Symbol;Acc:HGNC:9448]	PRM2	16	11275639	11276480	-1	protein_coding
ENSG00000175646	protamine 1 [Source:HGNC Symbol;Acc:HGNC:9447]	PRM1	16	11280836	11281350	-1	protein_coding
ENSG00000153253	sodium channel, voltage gated, type III alpha subunit [Source:HGNC Symbol;Acc:HGNC:10590]	SCN3A	2	165087522	165204067	-1	protein_coding
ENSG00000188897		CTD-3088G3.8	16	11359845	11523588	-1	protein_coding
ENSG00000231238	long intergenic non-protein coding RNA 349 [Source:HGNC Symbol;Acc:HGNC:42667]	LINC00349	13	18540497	18550697	1	lincRNA
ENSG00000229788	long intergenic non-protein coding RNA 388 [Source:HGNC Symbol;Acc:HGNC:42716]	LINC00388	13	18610298	18611675	-1	lincRNA
ENSG00000231914	long intergenic non-protein coding RNA 387 [Source:HGNC Symbol;Acc:HGNC:42715]	LINC00387	13	18672827	18676163	1	lincRNA
ENSG00000189067	lipopolysaccharide-induced TNF factor [Source:HGNC Symbol;Acc:HGNC:16841]	LITAF	16	11547722	11636381	-1	protein_coding
ENSG00000226250	long intergenic non-protein coding RNA 408 [Source:HGNC Symbol;Acc:HGNC:42740]	LINC00408	13	18905439	18907810	1	lincRNA
ENSG00000231358		RP11-442J17.3	13	18921889	18923765	-1	lincRNA
ENSG00000232243		RP11-408E5.5	13	19262797	19263873	-1	lincRNA
ENSG00000236834	long intergenic non-protein coding RNA 421 [Source:HGNC Symbol;Acc:HGNC:42755]	LINC00421	13	19345049	19346749	1	lincRNA
ENSG00000229791		RP11-385E5.5	13	19408042	19409529	-1	lincRNA
ENSG00000225316	long intergenic non-protein coding RNA 350 [Source:HGNC Symbol;Acc:HGNC:42668]	LINC00350	13	19587118	19588350	1	lincRNA
ENSG00000184602	stannin [Source:HGNC Symbol;Acc:HGNC:11149]	SNN	16	11668414	11679159	1	protein_coding
ENSG00000153066	thioredoxin domain containing 11 [Source:HGNC Symbol;Acc:HGNC:28030]	TXNDC11	16	11679080	11742878	-1	protein_coding
ENSG00000122299	zinc finger CCCH-type containing 7A [Source:HGNC Symbol;Acc:HGNC:30959]	ZC3H7A	16	11750586	11797267	-1	protein_coding
ENSG00000136531	sodium channel, voltage gated, type II alpha subunit [Source:HGNC Symbol;Acc:HGNC:10588]	SCN2A	2	165239402	165392310	1	protein_coding
ENSG00000171490	ribosomal L1 domain containing 1 [Source:HGNC Symbol;Acc:HGNC:24534]	RSL1D1	16	11833850	11851585	-1	protein_coding
ENSG00000178662	cysteine-serine-rich nuclear protein 3 [Source:HGNC Symbol;Acc:HGNC:30729]	CSRNP3	2	165469647	165689407	1	protein_coding
ENSG00000103342	G1 to S phase transition 1 [Source:HGNC Symbol;Acc:HGNC:4621]	GSPT1	16	11868128	11916082	-1	protein_coding
ENSG00000234719	Putative NPIP-like protein LOC729978 [Source:UniProtKB/Swiss-Prot;Acc:A6NJ64]	RP11-166B2.1	16	11927373	11976643	-1	protein_coding
ENSG00000048462	tumor necrosis factor receptor superfamily member 17 [Source:HGNC Symbol;Acc:HGNC:11913]	TNFRSF17	16	11965107	11968068	1	protein_coding
ENSG00000048471	sorting nexin 29 [Source:HGNC Symbol;Acc:HGNC:30542]	SNX29	16	11976737	12574289	1	protein_coding
ENSG00000103381	calcineurin-like phosphoesterase domain containing 1 [Source:HGNC Symbol;Acc:HGNC:25632]	CPPED1	16	12659799	12804017	-1	protein_coding
ENSG00000237515	shisa family member 9 [Source:HGNC Symbol;Acc:HGNC:37231]	SHISA9	16	12901620	13240413	1	protein_coding
ENSG00000177058	solute carrier family 38 member 9 [Source:HGNC Symbol;Acc:HGNC:26907]	SLC38A9	5	55625845	55773194	-1	protein_coding
ENSG00000030419	IKAROS family zinc finger 2 [Source:HGNC Symbol;Acc:HGNC:13177]	IKZF2	2	212999691	213152427	-1	protein_coding
ENSG00000152670	DEAD (Asp-Glu-Ala-Asp) box polypeptide 4 [Source:HGNC Symbol;Acc:HGNC:18700]	DDX4	5	55738017	55817157	1	protein_coding
ENSG00000144451	sperm associated antigen 16 [Source:HGNC Symbol;Acc:HGNC:23225]	SPAG16	2	213284379	214410501	1	protein_coding
ENSG00000174453	von Willebrand factor C domain containing protein 2-like [Source:HGNC Symbol;Acc:HGNC:37203]	VWC2L	2	214411065	214578959	1	protein_coding
ENSG00000164509	interleukin 31 receptor A [Source:HGNC Symbol;Acc:HGNC:18969]	IL31RA	5	55851379	55922853	1	protein_coding
ENSG00000004478	FK506 binding protein 4 [Source:HGNC Symbol;Acc:HGNC:3720]	FKBP4	12	2794953	2805423	1	protein_coding
ENSG00000111203	integrin alpha FG-GAP repeat containing 2 [Source:HGNC Symbol;Acc:HGNC:30879]	ITFG2	12	2812622	2859791	1	protein_coding
ENSG00000134352	interleukin 6 signal transducer [Source:HGNC Symbol;Acc:HGNC:6021]	IL6ST	5	55935095	55994993	-1	protein_coding
ENSG00000164512	ankyrin repeat domain 55 [Source:HGNC Symbol;Acc:HGNC:25681]	ANKRD55	5	56099678	56233359	-1	protein_coding
ENSG00000053702	nuclear receptor interacting protein 2 [Source:HGNC Symbol;Acc:HGNC:23078]	NRIP2	12	2825348	2835544	-1	protein_coding
ENSG00000119927	glycerol-3-phosphate acyltransferase, mitochondrial [Source:HGNC Symbol;Acc:HGNC:24865]	GPAM	10	112149864	112215377	-1	protein_coding
ENSG00000111206	forkhead box M1 [Source:HGNC Symbol;Acc:HGNC:3818]	FOXM1	12	2857681	2877155	-1	protein_coding
ENSG00000119913	tectorin beta [Source:HGNC Symbol;Acc:HGNC:11721]	TECTB	10	112283735	112305035	1	protein_coding
ENSG00000171792	RAD9-HUS1-RAD1 interacting nuclear orphan 1 [Source:HGNC Symbol;Acc:HGNC:28206]	RHNO1	12	2876258	2889523	1	protein_coding
ENSG00000078246	tubby like protein 3 [Source:HGNC Symbol;Acc:HGNC:12425]	TULP3	12	2877223	2941140	1	protein_coding
ENSG00000197142	acyl-CoA synthetase long-chain family member 5 [Source:HGNC Symbol;Acc:HGNC:16526]	ACSL5	10	112374018	112428380	1	protein_coding
ENSG00000197905	TEA domain family member 4 [Source:HGNC Symbol;Acc:HGNC:11717]	TEAD4	12	2959330	3040673	1	protein_coding
ENSG00000248727		CTC-236F12.4	5	56457795	56481946	-1	lincRNA
ENSG00000225940	chromosome 5 open reading frame 67 [Source:HGNC Symbol;Acc:HGNC:51252]	C5orf67	5	56511567	56606232	-1	protein_coding
ENSG00000095015	mitogen-activated protein kinase kinase kinase 1, E3 ubiquitin protein ligase [Source:HGNC Symbol;Acc:HGNC:6848]	MAP3K1	5	56815574	56896152	1	protein_coding
ENSG00000011105	tetraspanin 9 [Source:HGNC Symbol;Acc:HGNC:21640]	TSPAN9	12	3077355	3286564	1	protein_coding
ENSG00000111218	protein arginine methyltransferase 8 [Source:HGNC Symbol;Acc:HGNC:5188]	PRMT8	12	3381349	3593973	1	protein_coding
ENSG00000165084	chromosome 8 open reading frame 34 [Source:HGNC Symbol;Acc:HGNC:30905]	C8orf34	8	68330722	68819022	1	protein_coding
ENSG00000130038	calcium release activated channel regulator 2A [Source:HGNC Symbol;Acc:HGNC:28657]	CRACR2A	12	3606633	3764819	-1	protein_coding
ENSG00000155542	SET domain containing 9 [Source:HGNC Symbol;Acc:HGNC:28508]	SETD9	5	56909260	56925532	1	protein_coding
ENSG00000023041	zinc finger, DHHC-type containing 6 [Source:HGNC Symbol;Acc:HGNC:19160]	ZDHHC6	10	112424428	112446917	-1	protein_coding
ENSG00000155545	mesoderm induction early response 1, family member 3 [Source:HGNC Symbol;Acc:HGNC:26678]	MIER3	5	56919602	56971675	-1	protein_coding
ENSG00000137573	sulfatase 1 [Source:HGNC Symbol;Acc:HGNC:20391]	SULF1	8	69466624	69660915	1	protein_coding
ENSG00000151532	vesicle transport through interaction with t-SNAREs 1A [Source:HGNC Symbol;Acc:HGNC:17792]	VTI1A	10	112446998	112818744	1	protein_coding
ENSG00000111224	poly(ADP-ribose) polymerase family member 11 [Source:HGNC Symbol;Acc:HGNC:1186]	PARP11	12	3791047	3873448	-1	protein_coding
ENSG00000134452	F-box protein, helicase, 18 [Source:HGNC Symbol;Acc:HGNC:13620]	FBXO18	10	5890203	5937594	1	protein_coding
ENSG00000118971	cyclin D2 [Source:HGNC Symbol;Acc:HGNC:1583]	CCND2	12	4273772	4305350	1	protein_coding
ENSG00000148737	transcription factor 7-like 2 (T-cell specific, HMG-box) [Source:HGNC Symbol;Acc:HGNC:11641]	TCF7L2	10	112950250	113167678	1	protein_coding
ENSG00000078237	TP53 induced glycolysis regulatory phosphatase [Source:HGNC Symbol;Acc:HGNC:1185]	TIGAR	12	4307763	4354593	1	protein_coding
ENSG00000118972	fibroblast growth factor 23 [Source:HGNC Symbol;Acc:HGNC:3680]	FGF23	12	4368227	4379728	-1	protein_coding
ENSG00000111241	fibroblast growth factor 6 [Source:HGNC Symbol;Acc:HGNC:3684]	FGF6	12	4428155	4445614	-1	protein_coding
ENSG00000047621	chromosome 12 open reading frame 4 [Source:HGNC Symbol;Acc:HGNC:1184]	C12orf4	12	4487728	4538508	-1	protein_coding
ENSG00000137571	solute carrier organic anion transporter family member 5A1 [Source:HGNC Symbol;Acc:HGNC:19046]	SLCO5A1	8	69667047	69835064	-1	protein_coding
ENSG00000147596	PR domain containing 14 [Source:HGNC Symbol;Acc:HGNC:14001]	PRDM14	8	70051651	70071693	-1	protein_coding
ENSG00000111247	RAD51 associated protein 1 [Source:HGNC Symbol;Acc:HGNC:16956]	RAD51AP1	12	4538798	4560048	1	protein_coding
ENSG00000140396	nuclear receptor coactivator 2 [Source:HGNC Symbol;Acc:HGNC:7669]	NCOA2	8	70109762	70403805	-1	protein_coding
ENSG00000062194	GC-rich promoter binding protein 1 [Source:HGNC Symbol;Acc:HGNC:29520]	GPBP1	5	57173948	57264679	1	protein_coding
ENSG00000067167	translocation associated membrane protein 1 [Source:HGNC Symbol;Acc:HGNC:20568]	TRAM1	8	70573442	70608387	-1	protein_coding
ENSG00000010219	dual specificity tyrosine-(Y)-phosphorylation regulated kinase 4 [Source:HGNC Symbol;Acc:HGNC:3095]	DYRK4	12	4562204	4615302	1	protein_coding
ENSG00000169067	actin, beta-like 2 [Source:HGNC Symbol;Acc:HGNC:17780]	ACTBL2	5	57480016	57482809	-1	protein_coding
ENSG00000134470	interleukin 15 receptor subunit alpha [Source:HGNC Symbol;Acc:HGNC:5978]	IL15RA	10	5937569	5978187	-1	protein_coding
ENSG00000148702	hyaluronan binding protein 2 [Source:HGNC Symbol;Acc:HGNC:4798]	HABP2	10	113550837	113589602	1	protein_coding
ENSG00000111254	A-kinase anchoring protein 3 [Source:HGNC Symbol;Acc:HGNC:373]	AKAP3	12	4615508	4649047	-1	protein_coding
ENSG00000139180	NADH:ubiquinone oxidoreductase subunit A9 [Source:HGNC Symbol;Acc:HGNC:7693]	NDUFA9	12	4649095	4694317	1	protein_coding
ENSG00000197893	nebulin related anchoring protein [Source:HGNC Symbol;Acc:HGNC:7988]	NRAP	10	113588716	113664127	-1	protein_coding
ENSG00000134460	interleukin 2 receptor subunit alpha [Source:HGNC Symbol;Acc:HGNC:6008]	IL2RA	10	6010689	6062325	-1	protein_coding
ENSG00000255639		RP11-234B24.6	12	4657634	4744581	1	protein_coding
ENSG00000130035	polypeptide N-acetylgalactosaminyltransferase 8 [Source:HGNC Symbol;Acc:HGNC:4130]	GALNT8	12	4720341	4851927	1	protein_coding
ENSG00000134453	RNA binding motif protein 17 [Source:HGNC Symbol;Acc:HGNC:16944]	RBM17	10	6088987	6117457	1	protein_coding
ENSG00000170525	6-phosphofructo-2-kinase/fructose-2,6-biphosphatase 3 [Source:HGNC Symbol;Acc:HGNC:8874]	PFKFB3	10	6144934	6235545	1	protein_coding
ENSG00000165806	caspase 7 [Source:HGNC Symbol;Acc:HGNC:1508]	CASP7	10	113679162	113730907	1	protein_coding
ENSG00000073417	phosphodiesterase 8A [Source:HGNC Symbol;Acc:HGNC:8793]	PDE8A	15	84980440	85139145	1	protein_coding
ENSG00000148735	pleckstrin homology domain containing S1 [Source:HGNC Symbol;Acc:HGNC:26285]	PLEKHS1	10	113751454	113783429	1	protein_coding
ENSG00000212743		RP11-563J2.3	10	6350316	6352762	1	lincRNA
ENSG00000065675	protein kinase C, theta [Source:HGNC Symbol;Acc:HGNC:9410]	PRKCQ	10	6427143	6580301	-1	protein_coding
ENSG00000170776	A-kinase anchoring protein 13 [Source:HGNC Symbol;Acc:HGNC:371]	AKAP13	15	85380571	85749358	1	protein_coding
ENSG00000068796	kinesin heavy chain member 2A [Source:HGNC Symbol;Acc:HGNC:6318]	KIF2A	5	62306162	62537249	1	protein_coding
ENSG00000183655	kelch like family member 25 [Source:HGNC Symbol;Acc:HGNC:25732]	KLHL25	15	85759323	85795030	-1	protein_coding
ENSG00000166748	ATP/GTP binding protein-like 1 [Source:HGNC Symbol;Acc:HGNC:26504]	AGBL1	15	86141996	87029052	1	protein_coding
ENSG00000086189	DIM1 dimethyladenosine transferase 1 homolog [Source:HGNC Symbol;Acc:HGNC:30217]	DIMT1	5	62387254	62403939	-1	protein_coding
ENSG00000086200	importin 11 [Source:HGNC Symbol;Acc:HGNC:20628]	IPO11	5	62403972	62628582	1	protein_coding
ENSG00000186105	leucine rich repeat containing 70 [Source:HGNC Symbol;Acc:HGNC:35155]	LRRC70	5	62578735	62581448	1	protein_coding
ENSG00000223587		AY269186.1	3	23757	24501	1	lincRNA
ENSG00000224918		AY269186.2	3	53348	54346	-1	lincRNA
ENSG00000224957	long intergenic non-protein coding RNA 1266 [Source:HGNC Symbol;Acc:HGNC:50309]	LINC01266	3	536231	846015	1	lincRNA
ENSG00000224239		AC090044.2	3	857124	858091	1	lincRNA
ENSG00000235158		AC087430.1	3	1008135	1012934	1	lincRNA
ENSG00000232746		RP11-767C1.1	3	12877522	12885211	-1	lincRNA

## Sheet: Proinsulin.GWAS.Catalog.ANOVA
Expression in Endocrine Cells	Number of Genes (out of 185 genes, from 9 SNP indices)	Gene Symbol
Beta	1	METTL16
Alpha	2	ELL2, RP11-254I22.3
Delta	6	PRPF8, TCF7L2, GPAM, MED30, MDK, LNPEP
Gamma	3	TLE3, NDUFS3, GLRX
Beta.Delta	2	PSMC3, DDB2
Beta.Alpha.Delta	2	SLC30A8, RAB6A
Beta.Gamma.Delta	1	PCSK1
Pan-Islet	16	CELF1, VTI1A, YWHAE, ARHGAP1, RAD21, UTP23, EIF3H, ANAPC15, LAMTOR1, LRTOMT, NUMA1, CAST, VPS13C, RHOBTB3, TTC37, TPM1
Lowly Expressed (Average Log2CPM < 2 across all islet cells)	113	OR3A1, OR3A2, OR1A1, OR1A2, OR1G1, OR1D2, OR1D5, CLUH, MNT, SRR, SMG6, HIC1, OVCA2, RTN4RL1, OR4X1, OR4B1, PLEKHS1, SERPINF2, WDR81, NUP160, TLCD2, AGBL2, C1QTNF4, FAM180B, KBTBD4, RILP, CTD-2309O5.3, RAPSN, SCARF1, SLC39A13, SPI1, SLC43A2, NRAP, MYBPC3, RP11-667K14.3, HABP2, INPP5K, NR1H3, ACP2, PACSIN3, LRP4, ACSL5, TECTB, F2, ZNF408, EXT1, AMBRA1, CHRM4, FRRS1, PALMD, PLPPR4, PLPPR5, SNX7, CRE…
< 4-fold change	39	RAP1GAP2, PAFAH1B1, SGSM2, TSR1, DPH1, RPA1, SMYD4, SERPINF1, PTPRJ, CASP7, FNBP4, MTCH2, PTPMT1, PITPNA, MIR22HG, MADD, MYO1C, ZDHHC6, CRK, ARFGAP2, C11orf49, CKAP5, ATG13, HARBI1, AARD, DGKZ, DPYD, PLEKHB1, ATG16L2, STARD10, ERAP1, LRRC49, C2CD4A, RORA, ARSK, LINC01537, RP5-1070A16.1, RIOK2, NHLRC2

## Sheet: Proinsulin.GWAS.SNPs.Used
	DATE ADDED TO CATALOG	PUBMEDID	FIRST AUTHOR	DATE	JOURNAL	LINK	STUDY	DISEASE/TRAIT	INITIAL SAMPLE SIZE	REPLICATION SAMPLE SIZE	REGION	CHR_ID	CHR_POS	REPORTED GENE(S)	MAPPED_GENE	UPSTREAM_GENE_ID	DOWNSTREAM_GENE_ID	SNP_GENE_IDS	UPSTREAM_GENE_DISTANCE	DOWNSTREAM_GENE_DISTANCE	STRONGEST SNP-RISK ALLELE	SNPS	MERGED	SNP_ID_CURRENT	CONTEXT	INTERGENIC	RISK ALLELE FREQUENCY	P-VALUE	PVALUE_MLOG	P-VALUE (TEXT)	OR or BETA	95% CI (TEXT)	PLATFORM [SNPS PASSING QC]	CNV
5326	2011-09-27	21873549	Strawbridge RJ	2011-08-26	Diabetes	www.ncbi.nlm.nih.gov/pubmed/21873549	Genome-wide association identifies nine common variants associated with fasting proinsulin levels and provides new insights into the pathophysiology of type 2 diabetes.	Proinsulin levels	10,701 European ancestry individuals	16,378 European ancestry individuals	11q13.4	11	72721940	ARAP1	ARAP1	NA	NA	116985	NA	NA	rs11603334-A	rs11603334	NA	11603334	5_prime_UTR_variant	0	0.15	3e-102	101.523				Affymetrix, Illumina [~ 2500000] (imputed)	N
5327	2011-09-27	21873549	Strawbridge RJ	2011-08-26	Diabetes	www.ncbi.nlm.nih.gov/pubmed/21873549	Genome-wide association identifies nine common variants associated with fasting proinsulin levels and provides new insights into the pathophysiology of type 2 diabetes.	Proinsulin levels	10,701 European ancestry individuals	16,378 European ancestry individuals	11p11.2	11	47272248	MADD	MADD	NA	NA	8567	NA	NA	rs10501320-G	rs10501320	NA	10501320	5_prime_UTR_variant	0	0.72	1e-88	88				Affymetrix, Illumina [~ 2500000] (imputed)	N
5328	2011-09-27	21873549	Strawbridge RJ	2011-08-26	Diabetes	www.ncbi.nlm.nih.gov/pubmed/21873549	Genome-wide association identifies nine common variants associated with fasting proinsulin levels and provides new insights into the pathophysiology of type 2 diabetes.	Proinsulin levels	10,701 European ancestry individuals	16,378 European ancestry individuals	5q15	5	96393194	PCSK1	LOC101929710, PCSK1	NA	NA	101929710, 5122	NA	NA	rs6235-G	rs6235	NA	6235	missense_variant	0	0.28	1e-26	26				Affymetrix, Illumina [~ 2500000] (imputed)	N
5329	2011-09-27	21873549	Strawbridge RJ	2011-08-26	Diabetes	www.ncbi.nlm.nih.gov/pubmed/21873549	Genome-wide association identifies nine common variants associated with fasting proinsulin levels and provides new insights into the pathophysiology of type 2 diabetes.	Proinsulin levels	10,701 European ancestry individuals	16,378 European ancestry individuals	10q25.2	10	112998590	TCF7L2	TCF7L2	NA	NA	6934	NA	NA	rs7903146-T	rs7903146	NA	7903146	intron_variant	0	0.3	2e-20	19.699				Affymetrix, Illumina [~ 2500000] (imputed)	N
5330	2011-09-27	21873549	Strawbridge RJ	2011-08-26	Diabetes	www.ncbi.nlm.nih.gov/pubmed/21873549	Genome-wide association identifies nine common variants associated with fasting proinsulin levels and provides new insights into the pathophysiology of type 2 diabetes.	Proinsulin levels	10,701 European ancestry individuals	16,378 European ancestry individuals	15q22.2	15	62090956	C2CD4B, C2CD4A, VPS13C	NPM1P47 - C2CD4B	100129972	388125		7557	72582	rs4502156-T	rs4502156	NA	4502156	intergenic_variant	0	0.58	4e-20	19.3979				Affymetrix, Illumina [~ 2500000] (imputed)	N
5331	2011-09-27	21873549	Strawbridge RJ	2011-08-26	Diabetes	www.ncbi.nlm.nih.gov/pubmed/21873549	Genome-wide association identifies nine common variants associated with fasting proinsulin levels and provides new insights into the pathophysiology of type 2 diabetes.	Proinsulin levels	10,701 European ancestry individuals	16,378 European ancestry individuals	8q24.11	8	117173494	SLC30A8	SLC30A8, LOC105375716	NA	NA	169026, 105375716	NA	NA	rs11558471-A	rs11558471	NA	11558471	3_prime_UTR_variant	0	0.69	3e-18	17.5229				Affymetrix, Illumina [~ 2500000] (imputed)	N
5332	2011-09-27	21873549	Strawbridge RJ	2011-08-26	Diabetes	www.ncbi.nlm.nih.gov/pubmed/21873549	Genome-wide association identifies nine common variants associated with fasting proinsulin levels and provides new insights into the pathophysiology of type 2 diabetes.	Proinsulin levels	10,701 European ancestry individuals	16,378 European ancestry individuals	15q23	15	70816808	LARP6	RPL29P30 - LARP6	729611	55323		19662	14716	rs1549318-T	rs1549318	NA	1549318	intergenic_variant	0	0.61	2e-10	9.69897				Affymetrix, Illumina [~ 2500000] (imputed)	N
5333	2011-09-27	21873549	Strawbridge RJ	2011-08-26	Diabetes	www.ncbi.nlm.nih.gov/pubmed/21873549	Genome-wide association identifies nine common variants associated with fasting proinsulin levels and provides new insights into the pathophysiology of type 2 diabetes.	Proinsulin levels	10,701 European ancestry individuals	16,378 European ancestry individuals	17p13.3	17	2359409	SGSM2	SGSM2	NA	NA	9905	NA	NA	rs4790333-T	rs4790333	NA	4790333	intron_variant	0	0.45	3e-09	8.52288				Affymetrix, Illumina [~ 2500000] (imputed)	N
5334	2011-09-27	21873549	Strawbridge RJ	2011-08-26	Diabetes	www.ncbi.nlm.nih.gov/pubmed/21873549	Genome-wide association identifies nine common variants associated with fasting proinsulin levels and provides new insights into the pathophysiology of type 2 diabetes.	Proinsulin levels	10,701 European ancestry individuals	16,378 European ancestry individuals	1p21.3	1	98711697	SNX7	SNX7	NA	NA	51375	NA	NA	rs9727115-G	rs9727115	NA	9727115	intron_variant	0	0.64	2e-07	6.69897				Affymetrix, Illumina [~ 2500000] (imputed)	N

## Sheet: Proinsulin.Genes
	Description	Associated Gene Name	Chromosome Name	Gene Start (bp)	Gene End (bp)	Strand	Gene type
ENSG00000140416	tropomyosin 1 (alpha) [Source:HGNC Symbol;Acc:HGNC:12010]	TPM1	15	63042632	63071915	1	protein_coding
ENSG00000259616		RP11-507B12.2	15	61298791	61635449	-1	lincRNA
ENSG00000259530		RP11-259A24.1	15	61598514	61605241	1	lincRNA
ENSG00000259675		RP11-507B12.1	15	61639349	61715171	-1	lincRNA
ENSG00000259284		RP11-162I7.1	15	61729850	61731389	1	lincRNA
ENSG00000259697		RP11-299H22.1	15	62196145	62203318	-1	lincRNA
ENSG00000259878		RP11-1O10.1	15	62230384	62231895	-1	lincRNA
ENSG00000261296		RP11-299H22.6	15	62274163	62278365	1	lincRNA
ENSG00000260957		RP11-299H22.7	15	62284190	62285006	1	lincRNA
ENSG00000259727		RP11-1069G10.2	15	62895812	62899543	1	lincRNA
ENSG00000164308	endoplasmic reticulum aminopeptidase 2 [Source:HGNC Symbol;Acc:HGNC:29499]	ERAP2	5	96875939	96919716	1	protein_coding
ENSG00000198924	DNA cross-link repair 1A [Source:HGNC Symbol;Acc:HGNC:17660]	DCLRE1A	10	113834725	113854383	-1	protein_coding
ENSG00000196865	NHL repeat containing 2 [Source:HGNC Symbol;Acc:HGNC:24731]	NHLRC2	10	113854661	113917194	1	protein_coding
ENSG00000249917	long intergenic non-protein coding RNA 536 [Source:HGNC Symbol;Acc:HGNC:43645]	LINC00536	8	115950511	116325059	-1	lincRNA
ENSG00000113441	leucyl/cystinyl aminopeptidase [Source:HGNC Symbol;Acc:HGNC:6656]	LNPEP	5	96935394	97037515	1	protein_coding
ENSG00000253672		RP11-536K17.1	8	116402543	116403757	-1	lincRNA
ENSG00000259309		RP11-19J5.2	15	69820756	69822856	-1	lincRNA
ENSG00000259703	long intergenic non-protein coding RNA 593 [Source:HGNC Symbol;Acc:HGNC:32382]	LINC00593	15	69835234	69843120	1	lincRNA
ENSG00000259252		AC011648.1	15	70195638	70198509	-1	lincRNA
ENSG00000259503		RP11-543G18.1	15	70321576	70326742	1	lincRNA
ENSG00000259473		RP11-96C21.1	15	70503907	70505928	-1	lincRNA
ENSG00000259532		RP11-138H8.2	15	70748932	70754177	1	lincRNA
ENSG00000145721	limb and CNS expressed 1 [Source:HGNC Symbol;Acc:HGNC:18581]	LIX1	5	97091867	97142872	-1	protein_coding
ENSG00000058729	RIO kinase 2 [Source:HGNC Symbol;Acc:HGNC:18999]	RIOK2	5	97160867	97183260	-1	protein_coding
ENSG00000259946		RP11-490G2.2	1	97967005	97968814	-1	lincRNA
ENSG00000225206	MIR137 host gene [Source:HGNC Symbol;Acc:HGNC:42871]	MIR137HG	1	97986740	98049863	-1	lincRNA
ENSG00000226053		RP5-1070A16.1	1	98210747	98272658	1	lincRNA
ENSG00000224445		RP11-413P11.1	1	99472332	99600995	-1	lincRNA
ENSG00000250955		AC008592.7	5	95964999	95986311	-1	lincRNA
ENSG00000250551		RP11-254I22.1	5	96050115	96215519	1	lincRNA
ENSG00000249746		RP11-254I22.3	5	96213346	96215075	-1	lincRNA
ENSG00000250158		RP11-254I22.2	5	96247776	96278751	1	lincRNA
ENSG00000251054		CTD-2215E18.3	5	97223371	97227957	-1	lincRNA
ENSG00000227467	long intergenic non-protein coding RNA 1537 [Source:HGNC Symbol;Acc:HGNC:51301]	LINC01537	11	72570660	72573229	1	lincRNA
ENSG00000256568		RP11-800A3.3	11	73176694	73181696	1	lincRNA
ENSG00000153347	family with sequence similarity 81 member B [Source:HGNC Symbol;Acc:HGNC:26335]	FAM81B	5	95391344	95450454	1	protein_coding
ENSG00000198677	tetratricopeptide repeat domain 37 [Source:HGNC Symbol;Acc:HGNC:23639]	TTC37	5	95463895	95555007	-1	protein_coding
ENSG00000164291	arylsulfatase family member K [Source:HGNC Symbol;Acc:HGNC:25239]	ARSK	5	95555074	95605064	1	protein_coding
ENSG00000178015	G protein-coupled receptor 150 [Source:HGNC Symbol;Acc:HGNC:23628]	GPR150	5	95620078	95622142	1	protein_coding
ENSG00000175449	Rieske (Fe-S) domain containing [Source:HGNC Symbol;Acc:HGNC:29587]	RFESD	5	95646754	95684773	1	protein_coding
ENSG00000145757	spermatogenesis associated 9 [Source:HGNC Symbol;Acc:HGNC:22988]	SPATA9	5	95652181	95698711	-1	protein_coding
ENSG00000164292	Rho-related BTB domain containing 3 [Source:HGNC Symbol;Acc:HGNC:18757]	RHOBTB3	5	95713522	95824383	1	protein_coding
ENSG00000173221	glutaredoxin [Source:HGNC Symbol;Acc:HGNC:4330]	GLRX	5	95751319	95823005	-1	protein_coding
ENSG00000236882	long intergenic non-protein coding RNA 1554 [Source:HGNC Symbol;Acc:HGNC:24687]	LINC01554	5	95852232	95860133	1	lincRNA
ENSG00000118985	elongation factor, RNA polymerase II, 2 [Source:HGNC Symbol;Acc:HGNC:17064]	ELL2	5	95885098	95962071	-1	protein_coding
ENSG00000175426	proprotein convertase subtilisin/kexin type 1 [Source:HGNC Symbol;Acc:HGNC:8743]	PCSK1	5	96390415	96434143	-1	protein_coding
ENSG00000069667	RAR-related orphan receptor A [Source:HGNC Symbol;Acc:HGNC:10258]	RORA	15	60488284	61229319	-1	protein_coding
ENSG00000129003	vacuolar protein sorting 13 homolog C (S. cerevisiae) [Source:HGNC Symbol;Acc:HGNC:23594]	VPS13C	15	61852389	62060473	-1	protein_coding
ENSG00000153113	calpastatin [Source:HGNC Symbol;Acc:HGNC:1515]	CAST	5	96525267	96779595	1	protein_coding
ENSG00000198535	C2 calcium-dependent domain containing 4A [Source:HGNC Symbol;Acc:HGNC:33627]	C2CD4A	15	62066977	62070917	1	protein_coding
ENSG00000205502	C2 calcium-dependent domain containing 4B [Source:HGNC Symbol;Acc:HGNC:33628]	C2CD4B	15	62163535	62165283	-1	protein_coding
ENSG00000171914	talin 2 [Source:HGNC Symbol;Acc:HGNC:15447]	TLN2	15	62390526	62844631	1	protein_coding
ENSG00000140332	transducin like enhancer of split 3 [Source:HGNC Symbol;Acc:HGNC:11839]	TLE3	15	70047790	70098176	-1	protein_coding
ENSG00000137831	uveal autoantigen with coiled-coil domains and ankyrin repeats [Source:HGNC Symbol;Acc:HGNC:15947]	UACA	15	70654554	70763593	-1	protein_coding
ENSG00000166173	La ribonucleoprotein domain family member 6 [Source:HGNC Symbol;Acc:HGNC:24012]	LARP6	15	70829130	70854159	-1	protein_coding
ENSG00000137821	leucine rich repeat containing 49 [Source:HGNC Symbol;Acc:HGNC:25965]	LRRC49	15	70853239	71053657	1	protein_coding
ENSG00000129028	THAP domain containing 10 [Source:HGNC Symbol;Acc:HGNC:23193]	THAP10	15	70881342	70892785	-1	protein_coding
ENSG00000187720	thrombospondin type 1 domain containing 4 [Source:HGNC Symbol;Acc:HGNC:25835]	THSD4	15	71096952	71783383	1	protein_coding
ENSG00000225362	cancer/testis antigen 62 [Source:HGNC Symbol;Acc:HGNC:27286]	CT62	15	71110244	71115494	-1	protein_coding
ENSG00000164307	endoplasmic reticulum aminopeptidase 1 [Source:HGNC Symbol;Acc:HGNC:18173]	ERAP1	5	96760810	96808100	-1	protein_coding
ENSG00000158483	family with sequence similarity 86 member C1 [Source:HGNC Symbol;Acc:HGNC:25561]	FAM86C1	11	71787510	71801236	1	protein_coding
ENSG00000184276	defensin beta 108B [Source:HGNC Symbol;Acc:HGNC:29966]	DEFB108B	11	71833200	71837710	1	protein_coding
ENSG00000254469	Putative short transient receptor potential channel 2-like protein [Source:UniProtKB/Swiss-Prot;Acc:Q6ZNB5]	RP11-849H4.2	11	71865509	71928654	-1	protein_coding
ENSG00000137522	ring finger protein 121 [Source:HGNC Symbol;Acc:HGNC:21070]	RNF121	11	71928701	71997597	1	protein_coding
ENSG00000137496	interleukin 18 binding protein [Source:HGNC Symbol;Acc:HGNC:5987]	IL18BP	11	71998541	72005715	1	protein_coding
ENSG00000137497	nuclear mitotic apparatus protein 1 [Source:HGNC Symbol;Acc:HGNC:8059]	NUMA1	11	72002864	72080693	-1	protein_coding
ENSG00000184154	leucine rich transmembrane and O-methyltransferase domain containing [Source:HGNC Symbol;Acc:HGNC:25033]	LRTOMT	11	72080331	72110782	1	protein_coding
ENSG00000149357	late endosomal/lysosomal adaptor, MAPK and MTOR activator 1 [Source:HGNC Symbol;Acc:HGNC:26068]	LAMTOR1	11	72085895	72103387	-1	protein_coding
ENSG00000110200	anaphase promoting complex subunit 15 [Source:HGNC Symbol;Acc:HGNC:24531]	ANAPC15	11	72106378	72112780	-1	protein_coding
ENSG00000110203	folate receptor 3 (gamma) [Source:HGNC Symbol;Acc:HGNC:3795]	FOLR3	11	72114869	72139892	1	protein_coding
ENSG00000110195	folate receptor 1 (adult) [Source:HGNC Symbol;Acc:HGNC:3791]	FOLR1	11	72189558	72196301	1	protein_coding
ENSG00000165457	folate receptor 2 (fetal) [Source:HGNC Symbol;Acc:HGNC:3793]	FOLR2	11	72216601	72221950	1	protein_coding
ENSG00000165458	inositol polyphosphate phosphatase like 1 [Source:HGNC Symbol;Acc:HGNC:6080]	INPPL1	11	72223701	72239105	1	protein_coding
ENSG00000165462	paired-like homeobox 2a [Source:HGNC Symbol;Acc:HGNC:691]	PHOX2A	11	72239077	72245664	-1	protein_coding
ENSG00000162129	ClpB homolog, mitochondrial AAA ATPase chaperonin [Source:HGNC Symbol;Acc:HGNC:30664]	CLPB	11	72292425	72434680	-1	protein_coding
ENSG00000186642	phosphodiesterase 2A [Source:HGNC Symbol;Acc:HGNC:8777]	PDE2A	11	72576141	72674591	-1	protein_coding
ENSG00000186635	ArfGAP with RhoGAP domain, ankyrin repeat and PH domain 1 [Source:HGNC Symbol;Acc:HGNC:16925]	ARAP1	11	72685069	72793599	-1	protein_coding
ENSG00000214530	StAR related lipid transfer domain containing 10 [Source:HGNC Symbol;Acc:HGNC:10666]	STARD10	11	72754729	72794168	-1	protein_coding
ENSG00000168010	autophagy related 16 like 2 [Source:HGNC Symbol;Acc:HGNC:25464]	ATG16L2	11	72814308	72843674	1	protein_coding
ENSG00000137478	FCH and double SH3 domains 2 [Source:HGNC Symbol;Acc:HGNC:29114]	FCHSD2	11	72836745	73142261	-1	protein_coding
ENSG00000175591	purinergic receptor P2Y, G-protein coupled, 2 [Source:HGNC Symbol;Acc:HGNC:8541]	P2RY2	11	73218298	73236352	1	protein_coding
ENSG00000171631	pyrimidinergic receptor P2Y, G-protein coupled, 6 [Source:HGNC Symbol;Acc:HGNC:8543]	P2RY6	11	73264505	73298617	1	protein_coding
ENSG00000110237	Rho guanine nucleotide exchange factor 17 [Source:HGNC Symbol;Acc:HGNC:21726]	ARHGEF17	11	73308289	73369091	1	protein_coding
ENSG00000054967	RELT tumor necrosis factor receptor [Source:HGNC Symbol;Acc:HGNC:13764]	RELT	11	73376264	73397474	1	protein_coding
ENSG00000054965	family with sequence similarity 168 member A [Source:HGNC Symbol;Acc:HGNC:28999]	FAM168A	11	73400487	73598189	-1	protein_coding
ENSG00000021300	pleckstrin homology domain containing B1 [Source:HGNC Symbol;Acc:HGNC:19079]	PLEKHB1	11	73646178	73662819	1	protein_coding
ENSG00000175582	RAB6A, member RAS oncogene family [Source:HGNC Symbol;Acc:HGNC:9786]	RAB6A	11	73675638	73761137	-1	protein_coding
ENSG00000157613	cAMP responsive element binding protein 3-like 1 [Source:HGNC Symbol;Acc:HGNC:18856]	CREB3L1	11	46277661	46321422	1	protein_coding
ENSG00000147677	eukaryotic translation initiation factor 3 subunit H [Source:HGNC Symbol;Acc:HGNC:3273]	EIF3H	8	116642130	116766925	-1	protein_coding
ENSG00000147679	UTP23, small subunit processome component [Source:HGNC Symbol;Acc:HGNC:28224]	UTP23	8	116766503	116849463	1	protein_coding
ENSG00000188641	dihydropyrimidine dehydrogenase [Source:HGNC Symbol;Acc:HGNC:3012]	DPYD	1	97077743	97921049	-1	protein_coding
ENSG00000164754	RAD21 cohesin complex component [Source:HGNC Symbol;Acc:HGNC:9811]	RAD21	8	116845935	116874866	-1	protein_coding
ENSG00000149091	diacylglycerol kinase, zeta [Source:HGNC Symbol;Acc:HGNC:2857]	DGKZ	11	46332905	46380554	1	protein_coding
ENSG00000162627	sorting nexin 7 [Source:HGNC Symbol;Acc:HGNC:14971]	SNX7	1	98661701	98760500	1	protein_coding
ENSG00000117598	phospholipid phosphatase related 5 [Source:HGNC Symbol;Acc:HGNC:31703]	PLPPR5	1	98890245	99005032	-1	protein_coding
ENSG00000117600	phospholipid phosphatase related 4 [Source:HGNC Symbol;Acc:HGNC:23496]	PLPPR4	1	99263953	99309590	1	protein_coding
ENSG00000099260	palmdelphin [Source:HGNC Symbol;Acc:HGNC:15846]	PALMD	1	99645943	99694541	1	protein_coding
ENSG00000156869	ferric-chelate reductase 1 [Source:HGNC Symbol;Acc:HGNC:27622]	FRRS1	1	99708703	99766631	-1	protein_coding
ENSG00000110492	midkine (neurite growth-promoting factor 2) [Source:HGNC Symbol;Acc:HGNC:6972]	MDK	11	46380756	46383837	1	protein_coding
ENSG00000205002	alanine and arginine rich domain containing protein [Source:HGNC Symbol;Acc:HGNC:33842]	AARD	8	116938199	116944487	1	protein_coding
ENSG00000164756	solute carrier family 30 (zinc transporter), member 8 [Source:HGNC Symbol;Acc:HGNC:20303]	SLC30A8	8	116950273	117176714	1	protein_coding
ENSG00000180720	cholinergic receptor, muscarinic 4 [Source:HGNC Symbol;Acc:HGNC:1953]	CHRM4	11	46385098	46386608	-1	protein_coding
ENSG00000110497	autophagy/beclin-1 regulator 1 [Source:HGNC Symbol;Acc:HGNC:25990]	AMBRA1	11	46396414	46594125	-1	protein_coding
ENSG00000164758	mediator complex subunit 30 [Source:HGNC Symbol;Acc:HGNC:23032]	MED30	8	117520713	117540262	1	protein_coding
ENSG00000182197	exostosin glycosyltransferase 1 [Source:HGNC Symbol;Acc:HGNC:3512]	EXT1	8	117794490	118111853	-1	protein_coding
ENSG00000180423	harbinger transposase derived 1 [Source:HGNC Symbol;Acc:HGNC:26522]	HARBI1	11	46602861	46617909	-1	protein_coding
ENSG00000175224	autophagy related 13 [Source:HGNC Symbol;Acc:HGNC:29091]	ATG13	11	46617527	46674818	1	protein_coding
ENSG00000175220	Rho GTPase activating protein 1 [Source:HGNC Symbol;Acc:HGNC:673]	ARHGAP1	11	46677080	46700615	-1	protein_coding
ENSG00000119927	glycerol-3-phosphate acyltransferase, mitochondrial [Source:HGNC Symbol;Acc:HGNC:24865]	GPAM	10	112149864	112215377	-1	protein_coding
ENSG00000175213	zinc finger protein 408 [Source:HGNC Symbol;Acc:HGNC:20041]	ZNF408	11	46700818	46705912	1	protein_coding
ENSG00000180210	coagulation factor II (thrombin) [Source:HGNC Symbol;Acc:HGNC:3535]	F2	11	46719180	46739506	1	protein_coding
ENSG00000119913	tectorin beta [Source:HGNC Symbol;Acc:HGNC:11721]	TECTB	10	112283735	112305035	1	protein_coding
ENSG00000175216	cytoskeleton associated protein 5 [Source:HGNC Symbol;Acc:HGNC:28959]	CKAP5	11	46743048	46846308	-1	protein_coding
ENSG00000197142	acyl-CoA synthetase long-chain family member 5 [Source:HGNC Symbol;Acc:HGNC:16526]	ACSL5	10	112374018	112428380	1	protein_coding
ENSG00000134569	LDL receptor related protein 4 [Source:HGNC Symbol;Acc:HGNC:6696]	LRP4	11	46856868	46918642	-1	protein_coding
ENSG00000149179	chromosome 11 open reading frame 49 [Source:HGNC Symbol;Acc:HGNC:28720]	C11orf49	11	46936689	47164385	1	protein_coding
ENSG00000108953	tyrosine 3-monooxygenase/tryptophan 5-monooxygenase activation protein, epsilon [Source:HGNC Symbol;Acc:HGNC:12851]	YWHAE	17	1344272	1400378	-1	protein_coding
ENSG00000149182	ADP ribosylation factor GTPase activating protein 2 [Source:HGNC Symbol;Acc:HGNC:13504]	ARFGAP2	11	47164299	47177125	-1	protein_coding
ENSG00000167193	v-crk avian sarcoma virus CT10 oncogene homolog [Source:HGNC Symbol;Acc:HGNC:2362]	CRK	17	1420689	1463162	-1	protein_coding
ENSG00000023041	zinc finger, DHHC-type containing 6 [Source:HGNC Symbol;Acc:HGNC:19160]	ZDHHC6	10	112424428	112446917	-1	protein_coding
ENSG00000165912	protein kinase C and casein kinase substrate in neurons 3 [Source:HGNC Symbol;Acc:HGNC:8572]	PACSIN3	11	47177525	47186443	-1	protein_coding
ENSG00000134574	damage-specific DNA binding protein 2 [Source:HGNC Symbol;Acc:HGNC:2718]	DDB2	11	47214465	47239240	1	protein_coding
ENSG00000151532	vesicle transport through interaction with t-SNAREs 1A [Source:HGNC Symbol;Acc:HGNC:17792]	VTI1A	10	112446998	112818744	1	protein_coding
ENSG00000134575	acid phosphatase 2, lysosomal [Source:HGNC Symbol;Acc:HGNC:123]	ACP2	11	47239302	47248906	-1	protein_coding
ENSG00000197879	myosin IC [Source:HGNC Symbol;Acc:HGNC:7597]	MYO1C	17	1464098	1492812	-1	protein_coding
ENSG00000148737	transcription factor 7-like 2 (T-cell specific, HMG-box) [Source:HGNC Symbol;Acc:HGNC:11641]	TCF7L2	10	112950250	113167678	1	protein_coding
ENSG00000025434	nuclear receptor subfamily 1 group H member 3 [Source:HGNC Symbol;Acc:HGNC:7966]	NR1H3	11	47248300	47269032	1	protein_coding
ENSG00000132376	inositol polyphosphate-5-phosphatase K [Source:HGNC Symbol;Acc:HGNC:33882]	INPP5K	17	1494571	1516888	-1	protein_coding
ENSG00000110514	MAP-kinase activating death domain [Source:HGNC Symbol;Acc:HGNC:6766]	MADD	11	47269161	47330031	1	protein_coding
ENSG00000186594	MIR22 host gene [Source:HGNC Symbol;Acc:HGNC:28219]	MIR22HG	17	1711493	1717174	-1	lincRNA
ENSG00000148702	hyaluronan binding protein 2 [Source:HGNC Symbol;Acc:HGNC:4798]	HABP2	10	113550837	113589602	1	protein_coding
ENSG00000263050		RP11-667K14.3	17	2043475	2044968	-1	lincRNA
ENSG00000134571	myosin binding protein C, cardiac [Source:HGNC Symbol;Acc:HGNC:7551]	MYBPC3	11	47331397	47352702	-1	protein_coding
ENSG00000174238	phosphatidylinositol transfer protein alpha [Source:HGNC Symbol;Acc:HGNC:9001]	PITPNA	17	1517718	1562816	-1	protein_coding
ENSG00000197893	nebulin related anchoring protein [Source:HGNC Symbol;Acc:HGNC:7988]	NRAP	10	113588716	113664127	-1	protein_coding
ENSG00000167703	solute carrier family 43 (amino acid system L transporter), member 2 [Source:HGNC Symbol;Acc:HGNC:23087]	SLC43A2	17	1569267	1628886	-1	protein_coding
ENSG00000066336	Spi-1 proto-oncogene [Source:HGNC Symbol;Acc:HGNC:11241]	SPI1	11	47354860	47378576	-1	protein_coding
ENSG00000165915	solute carrier family 39 (zinc transporter), member 13 [Source:HGNC Symbol;Acc:HGNC:20859]	SLC39A13	11	47407132	47416501	1	protein_coding
ENSG00000165916	proteasome 26S subunit, ATPase 3 [Source:HGNC Symbol;Acc:HGNC:9549]	PSMC3	11	47418769	47426473	-1	protein_coding
ENSG00000074660	scavenger receptor class F member 1 [Source:HGNC Symbol;Acc:HGNC:16820]	SCARF1	17	1633858	1645747	-1	protein_coding
ENSG00000165917	receptor associated protein of the synapse [Source:HGNC Symbol;Acc:HGNC:9863]	RAPSN	11	47437757	47449178	-1	protein_coding
ENSG00000261848		CTD-2309O5.3	17	3134969	3177031	-1	lincRNA
ENSG00000167705	Rab interacting lysosomal protein [Source:HGNC Symbol;Acc:HGNC:30266]	RILP	17	1646145	1650077	-1	protein_coding
ENSG00000149187	CUGBP, Elav-like family member 1 [Source:HGNC Symbol;Acc:HGNC:2549]	CELF1	11	47465944	47565569	-1	protein_coding
ENSG00000174231	pre-mRNA processing factor 8 [Source:HGNC Symbol;Acc:HGNC:17340]	PRPF8	17	1650629	1684882	-1	protein_coding
ENSG00000213619	NADH:ubiquinone oxidoreductase core subunit S3 [Source:HGNC Symbol;Acc:HGNC:7710]	NDUFS3	11	47565336	47584562	1	protein_coding
ENSG00000110536	protein tyrosine phosphatase, mitochondrial 1 [Source:HGNC Symbol;Acc:HGNC:26965]	PTPMT1	11	47565430	47573461	1	protein_coding
ENSG00000123444	kelch repeat and BTB (POZ) domain containing 4 [Source:HGNC Symbol;Acc:HGNC:23761]	KBTBD4	11	47572197	47579015	-1	protein_coding
ENSG00000196666	family with sequence similarity 180 member B [Source:HGNC Symbol;Acc:HGNC:34451]	FAM180B	11	47586693	47589194	1	protein_coding
ENSG00000172247	C1q and tumor necrosis factor related protein 4 [Source:HGNC Symbol;Acc:HGNC:14346]	C1QTNF4	11	47589664	47594659	-1	protein_coding
ENSG00000109919	mitochondrial carrier 2 [Source:HGNC Symbol;Acc:HGNC:17587]	MTCH2	11	47617315	47642623	-1	protein_coding
ENSG00000165923	ATP/GTP binding protein-like 2 [Source:HGNC Symbol;Acc:HGNC:26296]	AGBL2	11	47659591	47715389	-1	protein_coding
ENSG00000185561	TLC domain containing 2 [Source:HGNC Symbol;Acc:HGNC:33522]	TLCD2	17	1702790	1710438	-1	protein_coding
ENSG00000109920	formin binding protein 4 [Source:HGNC Symbol;Acc:HGNC:19752]	FNBP4	11	47716517	47767443	-1	protein_coding
ENSG00000030066	nucleoporin 160kDa [Source:HGNC Symbol;Acc:HGNC:18017]	NUP160	11	47778087	47848555	-1	protein_coding
ENSG00000167716	WD repeat domain 81 [Source:HGNC Symbol;Acc:HGNC:26600]	WDR81	17	1716523	1738599	1	protein_coding
ENSG00000165806	caspase 7 [Source:HGNC Symbol;Acc:HGNC:1508]	CASP7	10	113679162	113730907	1	protein_coding
ENSG00000167711	serpin peptidase inhibitor, clade F (alpha-2 antiplasmin, pigment epithelium derived factor), member 2 [Source:HGNC Symbol;Acc:HGNC:9075]	SERPINF2	17	1742836	1755268	1	protein_coding
ENSG00000149177	protein tyrosine phosphatase, receptor type, J [Source:HGNC Symbol;Acc:HGNC:9673]	PTPRJ	11	47980558	48170841	1	protein_coding
ENSG00000148735	pleckstrin homology domain containing S1 [Source:HGNC Symbol;Acc:HGNC:26285]	PLEKHS1	10	113751454	113783429	1	protein_coding
ENSG00000175619	olfactory receptor family 4 subfamily B member 1 [Source:HGNC Symbol;Acc:HGNC:8290]	OR4B1	11	48216792	48217762	1	protein_coding
ENSG00000176567	olfactory receptor family 4 subfamily X member 1 (gene/pseudogene) [Source:HGNC Symbol;Acc:HGNC:14854]	OR4X1	11	48263861	48264778	1	protein_coding
ENSG00000132386	serpin peptidase inhibitor, clade F (alpha-2 antiplasmin, pigment epithelium derived factor), member 1 [Source:HGNC Symbol;Acc:HGNC:8824]	SERPINF1	17	1761959	1777574	1	protein_coding
ENSG00000186532	SET and MYND domain containing 4 [Source:HGNC Symbol;Acc:HGNC:21067]	SMYD4	17	1779485	1830634	-1	protein_coding
ENSG00000132383	replication protein A1 [Source:HGNC Symbol;Acc:HGNC:10289]	RPA1	17	1829702	1900082	1	protein_coding
ENSG00000185924	reticulon 4 receptor-like 1 [Source:HGNC Symbol;Acc:HGNC:21329]	RTN4RL1	17	1934677	2025345	-1	protein_coding
ENSG00000108963	diphthamide biosynthesis 1 [Source:HGNC Symbol;Acc:HGNC:3003]	DPH1	17	2030110	2043430	1	protein_coding
ENSG00000262664	ovarian tumor suppressor candidate 2 [Source:HGNC Symbol;Acc:HGNC:24203]	OVCA2	17	2041936	2043430	1	protein_coding
ENSG00000177374	hypermethylated in cancer 1 [Source:HGNC Symbol;Acc:HGNC:4909]	HIC1	17	2054154	2063241	1	protein_coding
ENSG00000070366	SMG6 nonsense mediated mRNA decay factor [Source:HGNC Symbol;Acc:HGNC:17809]	SMG6	17	2059839	2303771	-1	protein_coding
ENSG00000167720	serine racemase [Source:HGNC Symbol;Acc:HGNC:14398]	SRR	17	2303383	2325260	1	protein_coding
ENSG00000167721	TSR1, 20S rRNA accumulation, homolog (S. cerevisiae) [Source:HGNC Symbol;Acc:HGNC:25542]	TSR1	17	2322503	2337507	-1	protein_coding
ENSG00000141258	small G protein signaling modulator 2 [Source:HGNC Symbol;Acc:HGNC:29026]	SGSM2	17	2337498	2381058	1	protein_coding
ENSG00000070444	MAX network transcriptional repressor [Source:HGNC Symbol;Acc:HGNC:7188]	MNT	17	2384060	2401118	-1	protein_coding
ENSG00000127804	methyltransferase like 16 [Source:HGNC Symbol;Acc:HGNC:28484]	METTL16	17	2405562	2511891	-1	protein_coding
ENSG00000007168	platelet activating factor acetylhydrolase 1b regulatory subunit 1 [Source:HGNC Symbol;Acc:HGNC:8574]	PAFAH1B1	17	2593210	2685615	1	protein_coding
ENSG00000132361	clustered mitochondria (cluA/CLU1) homolog [Source:HGNC Symbol;Acc:HGNC:29094]	CLUH	17	2689386	2712663	-1	protein_coding
ENSG00000132359	RAP1 GTPase activating protein 2 [Source:HGNC Symbol;Acc:HGNC:29176]	RAP1GAP2	17	2777056	3037739	1	protein_coding
ENSG00000262628	olfactory receptor family 1 subfamily D member 5 [Source:HGNC Symbol;Acc:HGNC:8186]	OR1D5	17	3062669	3063607	-1	protein_coding
ENSG00000184166	olfactory receptor family 1 subfamily D member 2 [Source:HGNC Symbol;Acc:HGNC:8183]	OR1D2	17	3092058	3092996	-1	protein_coding
ENSG00000183024	olfactory receptor family 1 subfamily G member 1 [Source:HGNC Symbol;Acc:HGNC:8204]	OR1G1	17	3126584	3127581	-1	protein_coding
ENSG00000172150	olfactory receptor family 1 subfamily A member 2 [Source:HGNC Symbol;Acc:HGNC:8180]	OR1A2	17	3197519	3198448	1	protein_coding
ENSG00000172146	olfactory receptor family 1 subfamily A member 1 [Source:HGNC Symbol;Acc:HGNC:8179]	OR1A1	17	3215621	3216550	1	protein_coding
ENSG00000221882	olfactory receptor family 3 subfamily A member 2 [Source:HGNC Symbol;Acc:HGNC:8283]	OR3A2	17	3277899	3278974	-1	protein_coding
ENSG00000180090	olfactory receptor family 3 subfamily A member 1 [Source:HGNC Symbol;Acc:HGNC:8282]	OR3A1	17	3291635	3292600	-1	protein_coding

## Sheet: T1D.GWAS.Catalog.ANOVA
Expression in Endocrine Cells	Number of Genes (out of 1944 genes, from 66 SNP indices)	Gene Symbol
Beta	25	AP5M1, EXOC5, CSDE1, MDP1, GDI2, SNX29, TMEM99, APOL4, RASGRP1, M6PR, GPN1, C6orf48, RNF34, PTEN, C1orf116, NACA, RASGRF1, SAMD12, RRAGD, TBC1D4, MPP1, RAPH1, CDKN1C, NAPA, IGF2
Alpha	12	HLA-B, HPS1, PYROXD2, LOXL4, R3HCC1L, MCOLN3, FAP, HLA-E, GCG, DPP4, YIPF2, RP11-266O8.1
Delta	10	TMEM260, PSME2, ATAD2, SPAG16, ERBB4, CEP192, ZFYVE26, KRBA2, ZC3H4, MCTP2
Gamma	6	PSMB5, DEPTOR, IKZF2, SMARCA4, LMBRD2, FAM174B
Beta.Alpha	8	BCAS2, ZC3H7A, SLC7A8, DDAH1, MAPRE1, SLC39A9, BRIX1, PAPSS2
Beta.Delta	5	SNX10, DHRS2, ITPR3, PFKFB2, INS
Beta.Gamma	1	GLIS3
Alpha.Gamma	2	SSX2IP, P4HA2
Gamma.Delta	2	CHN2, NCOA7
Beta.Alpha.Delta	2	TUBB, SUSD6
Beta.Alpha.Gamma	3	THUMPD1, ESYT1, SLC4A10
Beta.Gamma.Delta	3	PRKACB, APOL2, CABP7
Pan-Islet	136	EIF3C, MPDU1, SSR4, ISG20L2, BCAP31, HLA-C, POU5F1, TINF2, NEDD8, TAX1BP1, GABARAP, HNRNPA2B1, PSME1, BRD2, TMED3, MORF4L1, ENPP2, PSMA4, IREB2, RNASEK-C17orf49, RNASEK, LYRM2, RSL1D1, RPL31, LPIN1, GREB1, MRPS18B, ATF6B, CBFA2T2, EMP2, SEH1L, ABCF1, PTPN2, PRR3, EIF5B, KIF3B, TERF2IP, GABARAPL2, TMEM170A, SRSF5, MPPE1, CHMP1B, RBM23, WDR59, GLG1, SMARCE1, PSMD7, KANK2, DAD1, ACTN1, LDLR, HLA-A, …
Lowly Expressed (Average Log2CPM < 2 across all islet cells)	1300	C6orf47, CYB5D1, TMEM88, KDM6B, APOM, EFNB3, WRAP53, ATXN2L, NPIPB9, NPIPB8, SULT1A2, SGF29, NUPR1, IL27, APOBR, SHBG, OR6K2, RP11-435I10.4, NPIPB7, SOX15, AIF1, NPIPB6, SBK1, SPTA1, OR10Z1, XPO6, OR10X1, OR6P1, OR6Y1, OR10R2, OR10K1, GSG1L, OR10K2, OR10T2, CD1E, NCR3, CD1B, CD1C, CD1A, CD1D, KIRREL, CD5L, FCRL1, LST1, LTB, FCRL3, ARHGAP4, TNF, AVPR2, LTA, FCRL4, SLC35F4, NFKBIL1, ATP6V1G2, ETV3,…
< 4-fold change	429	CSNK2B, GPANK1, NAA38, DNAH2, TUFM, TP53, SULT1A1, ATP1B2, BAG6, SAT2, CLN3, PRRC2A, FXR2, EIF3CL, KIAA0556, GTF3C1, CD68, FCRL2, C14orf105, EIF4A1, NAA30, FCRL5, IDH3G, POLR2A, NRAS, ZBTB4, DDX39B, DENND2C, TRIM33, HDGF, MRPL24, CHRNB1, RRNAD1, HIPK1, MICA, TMEM256, AP4B1, BCL2L15, GOT1, RSBN1, CNNM1, PHTF1, MAGI3, SLC16A1, RABGGTA, ANKS4B, GMPR2, GPS2, LYRM1, DCUN1D3, CHMP4A, EIF5A, SLC39A7, TM…

[truncated: 5 more sheets: T1D.GWAS.SNPS.Used, T1D.Genes, T2D.GWAS.Catalog.ANOVA, T2D.GWAS.SNPS.Used, T2D.Genes]
