# Supplementary material for: Single-cell transcriptomes identify human islet cell signatures and reveal cell-type–specific expression changes in type 2 diabetes
Source: Genome Res. 2017 Feb;27(2):208–22. doi: 10.1101/gr.212720.116 (PMC5287227; doi:10.1101/gr.212720.116)
Supplement: Supplemental Material [file supp_gr.212720.116_Supplemental_Table_S13.xlsx]

## Sheet: Beta_DEGs_in_Wang_et_al_2016
Supplemental_Table_S13: Fold change and Wilcoxon rank sum test p-values of genes differentially expressed in diabetic and non-diabetic cell types from Lawlor et al. 2016, Wang et al. 2016, and Segerstolpe et al. 2016.
The first six sheets of the spreadsheet contain the cell type-specific differentially expressed genes that were detected in the Wang et al. 2016 or Segerstolpe et al. 2016 datasets. These sheets contain the gene symbols, fold change in expression in the respective T2D vs. ND cell type comparison, and the Wilcoxon rank sum test p-value. The last seven sheets of the spreadsheet contain lists of gen…
Gene_symbol	fold_change_in_Lawlor_et_al_2016	fold_change_in_Wang_et_al_2016	rank_test_pvals_in_Wang_et_al_2016
DLK1	4.02915	3.44801	1.30609e-05
FTH1	-1.91983	4.26394	4.4902e-05
ALDH1L2	6.19649	-5.44602	5.96718e-05
HSPA8	-1.47734	2.04896	0.00012583
RPL30	-1.36421	3.51969	0.000164104
EEF1A1	-1.33416	2.79846	0.00020525
HIST1H1E	-3.16596	-2.27451	0.00026527
RPS3A	-1.39995	2.66428	0.000596031
DPH1	-1.65905	2.85955	0.000596031
SYT13	2.2736	3.0411	0.000921352
GALNT1	-5.49516	-2.24915	0.00127455
RPL35A	-1.57099	2.36352	0.00131593
RPL9	-1.41421	4.32877	0.00169377
SLC39A4	-3.05912	-1.83463	0.00301575
DOCK6	-2.58894	-103.133	0.00310603
HSP90AB1	-1.49538	2.31367	0.00339166
MYL6	-1.58872	1.89204	0.00359499
NACA	-1.54563	1.7717	0.00506199
P4HA1	-3.75367	1.34776	0.00520559
ZNF260	5.0443	-1.63076	0.00631679
RPS28	-1.79915	2.20722	0.00649167
ORAOV1	-1.86042	-16.7667	0.00704243
SP100	2.01356	3.74761	0.00895163
ACTG1	-2.29947	1.98315	0.00943333
KIF27	10.0817	-1.27669	0.00968264
GNAS	1.42511	2.5955	0.0110183
ACTB	-2.27609	1.59604	0.0122007
TANC2	-2.90475	-1.27823	0.0122007
TIPIN	2.92602	-3.23879	0.0125132
IPO8	2.31679	-5.21799	0.014539
RPL5	-1.36885	1.96446	0.015275
BRWD1	2.42907	7.90365	0.015655
ERO1LB	1.88971	2.00266	0.0160433
SNRNP200	-2.1263	-1.07817	0.0160433
ZNF839	2.4559	-13.7422	0.018553
FARSB	-3.70847	5.12327	0.018553
CHGA	2.90228	1.4004	0.0194618
TARSL2	-2.85205	1.18752	0.0204089
TUBGCP6	1.77186	1.56781	0.0219039
F11	-16.4852	-4.09915	0.0219039
RPL32	-1.49825	2.39576	0.0257629
IRF9	-3.42119	4.50754	0.0263591
TUBB	-2.4227	-1.91693	0.0282188
SPP1	26.4791	1.84385	0.0282188
SLC38A6	-4.05891	-14.0391	0.028863
C19orf66	1.76211	-1.37679	0.028863
NDRG1	-4.59229	2.16156	0.0301891
TSC2	1.71347	1.57273	0.0301891
EEF1G	-1.48066	1.46924	0.0315666
RPS3	-1.43249	1.69788	0.0329971
RPL37	-1.72936	2.50563	0.0368151
GLUL	-5.01805	1.66495	0.0376218
ZNF793	1.43208	-1.05181	0.0392797
TMEM130	3.77187	2.5734	0.0409986
ACTR3C	3.44131	-4.60115	0.0418814
ENO1	-1.88994	2.25685	0.0446258
NHP2	-2.154	4.34006	0.0446258
VRK3	-1.90036	-1.38709	0.0455733
ACADSB	-2.18612	-1.1178	0.0495324
VASH2	1.72694	-16.9012	0.0526856
SH3BP2	1.88746	-3.00389	0.0526856
TMEM154	-3.50718	-1.20961	0.0583085
MTMR11	-11.6121	-1.9087	0.0606916
MIR24-2	-1.84766	-1.03361	0.0606916
GNPTAB	-2.64919	5.93025	0.0644153
CDH12	3.06818	-45.4137	0.0696683
SETDB2	2.54465	1.31519	0.0710345
OGDH	-2.04267	-1.89115	0.0724223
C11orf31	-2.3491	1.90561	0.0752638
OAZ1	-1.56421	2.27322	0.076718
MYO19	-2.70122	1.53226	0.0812168
SIN3B	1.69278	-3.69717	0.085925
CLTA	-2.15433	1.68309	0.0891831
KIAA1456	1.94156	-1.12203	0.0959944
SETX	-3.03457	3.19911	0.103211
RNFT2	1.92401	-1.48296	0.103211
RPS15	-1.49324	1.80058	0.106976
CCDC150	2.04997	-5.56681	0.106976
PPM1G	-2.91947	-3.52194	0.106976
WASF2	-2.75785	2.06872	0.108898
LSM11	2.74195	8.72315	0.110848
RBFOX3	2.51674	26.5123	0.112824
TOP1	-2.86751	1.52656	0.123121
PCCB	11.7742	4.78336	0.123121
STX16	-2.28946	3.71739	0.123121
GORASP2	-3.05069	1.40146	0.125265
MRPS15	-2.27811	4.94752	0.129639
TRPM6	-2.22153	-3.03032	0.129639
TOR1AIP2	-1.49597	-2.73178	0.129639
SLC13A5	1.54688	3.16121	0.129639
LRRC37A	2.93892	-2.51369	0.131869
CCT2	-2.46609	2.26627	0.131869
HNRNPM	-2.77696	1.21954	0.136419
ZFP82	-4.61021	5.14194	0.138738
CPE	1.61613	2.3029	0.138738
FLNB	-2.97681	2.57438	0.138738
FRMPD1	1.6965	-42.9543	0.141087
ANP32A	3.94064	-1.0214	0.141087
RPSA	-1.64647	1.88715	0.141087
EIF3I	-2.10539	2.4232	0.150785
ZNF841	-2.67054	-6.15962	0.153287
ADSSL1	2.9563	2.1255	0.15582
RPS7	-1.55717	1.69143	0.158383
PDHA1	-3.76662	1.68651	0.166265
SLC25A6	-1.90735	-17.6772	0.166265
GLS	2.38125	3.66726	0.168955
USP4	-3.90863	1.77624	0.177222
MAP3K9	-2.54523	12.5503	0.180042
FSD2	-2.22211	1.76951	0.197661
CCM2	-2.2409	23.2901	0.216495
GIT2	-2.30875	1.01682	0.219755
GAPDH	-1.87214	-1.12313	0.223048
LEPROTL1	-2.14333	1.68907	0.226377
HSPA5	-3.29639	-1.83153	0.229741
KRT8	-2.33302	1.50947	0.229741
FNBP1	-3.60421	-1.79585	0.23314
SMC4	10.3202	-2.30501	0.236573
HADHB	-2.34049	3.34625	0.236573
ALDOA	-1.65931	-1.07449	0.243547
TTC9C	-2.12396	1.16272	0.257919
SYT17	3.28174	-1.09008	0.261601
STAT5B	1.95367	1.5493	0.261601
UNC45A	2.34871	6.45578	0.261601
LRRC41	-3.96021	2.68358	0.276688
PEAK1	2.14198	-30.7816	0.280549
ACTN1	-1.95571	-1.67419	0.280549
NUP43	2.13956	2.4292	0.288381
SPOPL	-20.0061	-2.34858	0.308591
SCG2	1.98092	1.67486	0.316929
ZFP30	4.1352	-4.51637	0.325411
JMJD6	2.11234	9.03393	0.325411
TMEM2	-15.4199	-2.03002	0.34725
NFIA	5.69433	3.77461	0.356238
TJAP1	-2.20595	1.99663	0.360786
ESYT2	-1.78459	-1.89913	0.36537
STT3A	-2.28125	1.03354	0.379335
CRYZL1	-1.93473	-1.02946	0.379335
RPL35	-1.44262	1.28514	0.379335
WDR17	-3.20239	3.18008	0.388824
PDE12	-2.71321	2.17339	0.388824
SPTLC1	-3.65997	1.6986	0.398454
MED29	-2.82264	-1.00928	0.398454
PRMT2	-2.26363	1.56884	0.418135
SPCS2	-1.65732	1.18963	0.423142
NECAP2	-5.18153	3.13059	0.43326
C8orf59	-2.38463	1.54511	0.43326
SELK	-1.75863	1.41764	0.438371
TMED9	-8.68032	1.16911	0.448694
SEC22A	-2.54417	1.95897	0.448694
ATG10	3.15912	3.39299	0.453906
FAM134A	-2.3267	1.51457	0.459152
ZFP64	2.49448	2.4588	0.464432
HSPD1	-1.79376	1.7394	0.469744
OSTC	-2.03314	1.33948	0.480468
RNH1	-4.74419	1.48587	0.48588
RPL36	-1.4154	1.51441	0.48588
PAK1	9.30473	1.46039	0.496799
MACC1	2.15915	3.30541	0.496799
TUBA1B	-1.79588	1.11038	0.513418
SQSTM1	-1.92267	1.83204	0.513418
ABCF2	6.36692	-2.06574	0.513418
FTL	-2.59609	-1.76681	0.524654
KANK1	1.82091	-1.7109	0.524654
NDUFB8	-1.66056	1.29846	0.530319
COX7A2L	-1.69228	2.98232	0.530319
MALAT1	1.49573	-1.35498	0.553279
MR1	2.26365	2.52862	0.564938
PARK2	-1.74872	-3.25653	0.564938
ARHGAP29	2.96869	-8.31797	0.57081
TUBA1C	-2.88866	-2.67805	0.576712
MORF4L2	-1.74267	2.18393	0.582641
TPI1	-1.83348	1.23298	0.594584
PQLC2	-1.69178	-2.65998	0.594584
KREMEN1	1.70264	3.5258	0.600597
CLDN12	-3.26555	1.04309	0.612703
ADAT1	3.19774	4.14294	0.624914
STX1A	-2.86354	1.80981	0.649642
TTR	-2.60991	-1.07928	0.674759
RNPS1	-1.86707	3.72655	0.681095
MIR7-3HG	-2.08751	1.10334	0.693836
SIRT2	-2.32313	2.98713	0.700238
NUDT22	-1.90882	2.62908	0.713107
CERS5	-2.29732	1.68217	0.713107
SLC25A39	-4.13876	3.94428	0.719572
CARHSP1	-2.85322	-2.75829	0.726056
MYADM	-2.52361	3.34579	0.726056
ENO2	-2.3994	1.53849	0.726056
CLPP	-3.3448	-1.17488	0.732561
TRIP4	-2.94394	3.87583	0.732561
FAM175A	-2.43312	3.32143	0.739084
ZNF395	-3.27161	1.27249	0.739084
TADA1	-6.39537	1.45232	0.739084
DBT	4.04475	-1.92483	0.745626
DTWD2	2.61718	13.8084	0.752186
ZNF3	5.25597	1.744	0.752186
ZNF468	-4.20037	2.25583	0.758764
MRPS18B	-3.26962	1.30519	0.765359
GALNT10	-2.0864	1.00125	0.765359
POLR2A	-2.62127	-1.37551	0.771971
PABPC4	-2.0843	1.84806	0.7786
INS	-1.45365	1.01609	0.785244
EXOC2	10.2122	-2.15903	0.798579
POLR3K	-2.12808	9.079	0.805269
SPTLC2	-2.81624	1.51741	0.805269
DGKB	5.11152	4.46798	0.83892
COX4I1	-1.71497	1.72068	0.852466
CBX5	-1.85542	1.29356	0.852466
HELLS	2.72754	5.58416	0.859255
UBAC2	2.74345	1.71963	0.866055
ZHX3	-3.31106	-1.83245	0.872865
POLR1C	-5.25209	-1.17214	0.872865
KDSR	2.59182	-1.649	0.879684
RPL3	-1.59996	1.24001	0.886511
PDZD8	-1.98226	2.66338	0.913901
MPDU1	1.59168	3.01383	0.920765
NVL	-2.50125	1.85866	0.920765
PGK1	-1.95948	1.11749	0.934511
PDCD7	-3.62042	2.97003	0.941392
MTHFR	4.37299	2.13062	0.941392
PLAC8	4.75538	-1.55654	0.948277
AP2A2	1.73163	1.63159	0.948277
DNAJA3	-2.29145	1.26392	0.948277
DNASE1	-2.18695	1.05029	0.968952
CNOT10	2.56387	2.42989	0.975849
ZNF567	-2.99111	3.64301	0.982748
PRKAA1	-2.26149	2.233	0.982748
ZNF7	-2.78513	4.93366	0.996549
ZNF655	-2.03959	1.94688	0.996549

## Sheet: Beta_DEGs_in_Segerstolpe_et_al
Gene_symbol	fold_change_in_Lawlor_et_al_2016	fold_change_in_Segerstolpe _et_al_2016	rank_test_pvals_in_Segerstolpe _et_al_2016
CPE	1.61613	2.32089	4.91762e-25
EEF1A1	-1.33416	2.58071	1.16092e-21
RPL5	-1.36885	1.99102	2.33945e-21
INS	-1.45365	-2.50686	1.40344e-19
DLK1	4.02915	3.9461	2.11541e-17
TTR	-2.60991	-2.224	1.02253e-13
RPL35	-1.44262	-1.92924	2.7326e-13
LEPROTL1	-2.14333	2.26302	3.33643e-13
SCG2	1.98092	2.87905	6.76691e-13
ANP32A	3.94064	1.83723	8.89635e-12
GLS	2.38125	2.28052	1.36702e-11
TUBA1B	-1.79588	1.69518	5.16037e-11
TUBB	-2.4227	1.78587	8.17397e-11
OAZ1	-1.56421	-1.32714	1.65942e-10
DGKB	5.11152	8.75183	1.91671e-10
CBX5	-1.85542	1.67489	2.54614e-10
BRWD1	2.42907	2.42074	4.81898e-10
SYT13	2.2736	1.7703	9.50951e-10
ERO1LB	1.88971	1.49472	2.50141e-09
RPS15	-1.49324	-1.75491	3.49715e-09
GALNT10	-2.0864	2.70758	3.5039e-09
GNAS	1.42511	1.37035	6.90721e-09
PLAC8	4.75538	3.33851	7.1087e-09
MORF4L2	-1.74267	1.36555	1.32169e-08
ACTG1	-2.29947	1.62194	1.62695e-08
NFIA	5.69433	2.5394	1.6726e-08
TUBA1C	-2.88866	3.02508	1.82359e-08
IPO8	2.31679	4.01067	1.88246e-08
ATG10	3.15912	2.59599	2.26004e-08
WASF2	-2.75785	1.56205	3.29746e-08
RPL30	-1.36421	1.36964	5.5065e-08
ZNF655	-2.03959	2.01626	6.91563e-08
SETX	-3.03457	1.76752	6.93762e-08
FTL	-2.59609	-2.3236	8.95275e-08
ACTB	-2.27609	1.47714	3.35057e-07
CLDN12	-3.26555	1.82703	3.51187e-07
WDR17	-3.20239	2.07109	4.2028e-07
PRKAA1	-2.26149	1.96634	5.48699e-07
HADHB	-2.34049	1.52088	6.76386e-07
PGK1	-1.95948	1.31262	7.39931e-07
RPL36	-1.4154	-1.4925	9.6424e-07
KDSR	2.59182	1.75801	1.20802e-06
ZNF260	5.0443	2.41438	1.80966e-06
NDUFB8	-1.66056	-1.74733	2.27452e-06
ZNF468	-4.20037	2.20382	2.36279e-06
TADA1	-6.39537	2.3707	2.44827e-06
NACA	-1.54563	1.337	3.12091e-06
CERS5	-2.29732	1.52156	4.02131e-06
ADSSL1	2.9563	2.42932	4.11611e-06
SP100	2.01356	2.04916	5.14601e-06
STX16	-2.28946	1.84012	5.68605e-06
SYT17	3.28174	1.75044	9.56497e-06
ARHGAP29	2.96869	2.64595	1.01284e-05
RPS3A	-1.39995	1.46211	1.21693e-05
PDE12	-2.71321	1.54149	1.54108e-05
DNAJA3	-2.29145	1.29609	1.58416e-05
IRF9	-3.42119	1.62986	1.60204e-05
KIAA1456	1.94156	2.06122	1.64492e-05
CLTA	-2.15433	1.38185	2.07387e-05
TOP1	-2.86751	1.54568	2.09088e-05
POLR2A	-2.62127	1.78663	2.24564e-05
UNC45A	2.34871	1.17751	2.24991e-05
PPM1G	-2.91947	1.35718	2.54867e-05
ABCF2	6.36692	1.46956	2.67474e-05
SEC22A	-2.54417	1.18397	2.80262e-05
GIT2	-2.30875	1.43825	2.88932e-05
FNBP1	-3.60421	2.93294	3.13558e-05
RBFOX3	2.51674	1.25673	3.17907e-05
CHGA	2.90228	1.38821	3.39531e-05
SPOPL	-20.0061	3.22354	3.47144e-05
HSPA8	-1.47734	1.2208	3.85461e-05
ESYT2	-1.78459	1.7781	4.58122e-05
UBAC2	2.74345	1.50816	6.3896e-05
GNPTAB	-2.64919	3.64891	6.65563e-05
GORASP2	-3.05069	1.28401	7.57987e-05
DBT	4.04475	1.37928	7.70703e-05
SNRNP200	-2.1263	1.14022	8.38022e-05
HSPD1	-1.79376	1.3003	9.19734e-05
SPTLC1	-3.65997	1.25998	9.39474e-05
RPSA	-1.64647	1.3496	9.63708e-05
SQSTM1	-1.92267	1.22086	0.000102432
ZNF7	-2.78513	1.98645	0.000106643
MYADM	-2.52361	1.30813	0.000116337
MYO19	-2.70122	1.68092	0.000120041
RMDN1	-2.62378	1.66425	0.000150217
CCT2	-2.46609	1.24827	0.000183723
HNRNPM	-2.77696	1.23533	0.000195973
ZNF3	5.25597	1.32239	0.000246376
ENO1	-1.88994	1.31316	0.000282504
NUP43	2.13956	1.495	0.000294802
ZNF841	-2.67054	1.85114	0.00034446
ALDOA	-1.65931	-1.20429	0.000392435
TUBGCP6	1.77186	1.21504	0.000411585
STAT5B	1.95367	2.01933	0.000444668
USP4	-3.90863	1.87521	0.000452851
MED29	-2.82264	1.24576	0.000470349
OGDH	-2.04267	1.22719	0.000522783
SETDB2	2.54465	1.91292	0.000530323
ZFP82	-4.61021	1.76942	0.00053697
CNOT10	2.56387	1.32605	0.000601327
SUCO	2.90045	1.38346	0.000661662
TMEM130	3.77187	2.76029	0.000894408
DTWD2	2.61718	2.77109	0.0009527
STT3A	-2.28125	1.08587	0.00100295
EXOC2	10.2122	1.03795	0.00118141
PAK1	9.30473	-1.14996	0.00118673
DPH1	-1.65905	1.20482	0.00135534
RPL3	-1.59996	1.15985	0.00137897
KREMEN1	1.70264	1.62958	0.00161697
C19orf66	1.76211	1.27205	0.00185953
ZFP30	4.1352	2.12305	0.0019126
CRYZL1	-1.93473	-1.32656	0.00204297
C11orf31	-2.3491	-1.28691	0.00228381
NECAP2	-5.18153	1.14499	0.00238325
RPS3	-1.43249	1.19404	0.00246517
MRPS15	-2.27811	1.10159	0.00253097
COX4I1	-1.71497	-1.14378	0.00280104
RNFT2	1.92401	1.81765	0.00344934
MPDU1	1.59168	1.40245	0.00394214
FAM175A	-2.43312	2.71351	0.00417362
RPL35A	-1.57099	1.15454	0.00426632
OSTC	-2.03314	1.10343	0.00468152
VRK3	-1.90036	-1.03336	0.00479937
ZNF839	2.4559	1.297	0.0057964
TMED9	-8.68032	1.31411	0.0071131
ADAT1	3.19774	1.12913	0.00713833
DNASE1	-2.18695	-1.07186	0.00745928
MR1	2.26365	1.71846	0.00772936
TTC9C	-2.12396	1.23653	0.00812185
TJAP1	-2.20595	1.20444	0.00830026
POLR3K	-2.12808	1.15108	0.00975228
PDZD8	-1.98226	1.50311	0.010639
TSC2	1.71347	1.13536	0.0116171
RPL32	-1.49825	-1.40962	0.0130857
LRRC41	-3.96021	1.11237	0.0140635
TANC2	-2.90475	1.13937	0.0142069
NUDT22	-1.90882	-1.04424	0.0148914
ZHX3	-3.31106	1.24101	0.0154586
CCM2	-2.2409	1.13367	0.0172989
AP2A2	1.73163	1.04181	0.0179959
FARSB	-3.70847	-1.04774	0.0185566
PEAK1	2.14198	8.68943	0.0193797
ACTR3C	3.44131	1.1968	0.0197676
FAM210A	-3.9783	1.80258	0.0203913
ZNF793	1.43208	3.30856	0.0206101
RPL37	-1.72936	-1.27016	0.0225844
SMC4	10.3202	-1.09863	0.027298
FRMPD1	1.6965	3.65719	0.0275679
C8orf59	-2.38463	1.03047	0.0280884
ORAOV1	-1.86042	2.00403	0.0285698
GALNT1	-5.49516	1.08957	0.028922
TMEM2	-15.4199	1.72173	0.0293683
KANK1	1.82091	2.19979	0.0310517
KRT8	-2.33302	-1.20259	0.0378041
STX1A	-2.86354	1.1881	0.0382623
EIF3I	-2.10539	1.04648	0.0388535
PARK2	-1.74872	1.63527	0.039856
SLC25A39	-4.13876	1.06031	0.0404847
HSPA5	-3.29639	-1.21432	0.0407677
FAM217B	-2.35843	1.52466	0.0414997
MRPS18B	-3.26962	-1.02306	0.0426521
SIN3B	1.69278	1.07444	0.0428411
TRIP4	-2.94394	1.0154	0.0430516
RPS28	-1.79915	1.09425	0.0459006
PDCD7	-3.62042	1.41511	0.0460113
PDHA1	-3.76662	-1.15515	0.0510263
TPI1	-1.83348	-1.28578	0.0513139
LSM11	2.74195	4.34217	0.0569782
NDRG1	-4.59229	1.07502	0.0592844
ACADSB	-2.18612	-1.26385	0.0596015
SIRT2	-2.32313	-1.11478	0.0613221
ZFP64	2.49448	1.22735	0.0627087
TARSL2	-2.85205	1.36763	0.0744679
POLR1C	-5.25209	-1.22771	0.0748337
TRPM6	-2.22153	2.33158	0.0755069
MYL6	-1.58872	-1.12993	0.0787468
ALDH1L2	6.19649	2.73862	0.081332
RPL9	-1.41421	1.13519	0.0851186
NHP2	-2.154	-1.31864	0.0905024
SPTLC2	-2.81624	2.05707	0.0908524
SH3BP2	1.88746	1.01325	0.103751
ZNF395	-3.27161	1.04956	0.10558
NVL	-2.50125	1.4936	0.114943
SELK	-1.75863	-1.38697	0.115572
ACTN1	-1.95571	-1.48329	0.153833
JMJD6	2.11234	-1.4416	0.163241
FLNB	-2.97681	-1.05627	0.214568
SPCS2	-1.65732	1.01004	0.2251
FTH1	-1.91983	-1.38623	0.234552
CARHSP1	-2.85322	-1.48263	0.242955
P4HA1	-3.75367	1.1996	0.243603
HIST1H1E	-3.16596	-1.74491	0.255396
LRRC37A	2.93892	19.5846	0.277151
PCCB	11.7742	-1.168	0.286225
MTMR11	-11.6121	1.69368	0.288705
TIPIN	2.92602	1.60735	0.292573
MAP3K9	-2.54523	-1.01835	0.29488
RNPS1	-1.86707	1.02745	0.325518
MALAT1	1.49573	-1.11682	0.335091
SPP1	26.4791	22.4386	0.340133
ENO2	-2.3994	1.06621	0.341598
DOCK6	-2.58894	1.17981	0.3687
CLPP	-3.3448	-1.13269	0.370759
RPS7	-1.55717	-1.23861	0.401241
ZNF567	-2.99111	1.52487	0.410874
MTHFR	4.37299	-1.28658	0.426466
COX7A2L	-1.69228	-1.24502	0.438523
FAM134A	-2.3267	-1.17213	0.467039
FSD2	-2.22211	-1.27833	0.525467
GAPDH	-1.87214	1.07499	0.538836
FAM227A	1.92469	1.72435	0.551439
PABPC4	-2.0843	-1.13951	0.577321
HSP90AB1	-1.49538	-1.26166	0.610437
PRMT2	-2.26363	-1.10346	0.61384
PQLC2	-1.69178	-1.10009	0.637182
VASH2	1.72694	3.08225	0.63732
TOR1AIP2	-1.49597	-1.51816	0.642472
GLUL	-5.01805	-1.21411	0.673994
SLC38A6	-4.05891	-1.24524	0.735418
RNH1	-4.74419	-1.01543	0.750553
EEF1G	-1.48066	-1.03377	0.751251
CDH12	3.06818	-5.78713	0.754638
SLC39A4	-3.05912	-1.31756	0.806792
F11	-16.4852	1.08572	0.826389
HELLS	2.72754	1.23937	0.83566
SLC13A5	1.54688	-3.52234	0.836331
MIR7-3HG	-2.08751	-1.04436	0.83719
CCDC150	2.04997	-1.80257	0.842859
MACC1	2.15915	1.17174	0.854092
KIF27	10.0817	-1.2978	0.898898
TMEM154	-3.50718	8.77561	0.914874
MIR24-2	-1.84766	NA	NA
SLC25A6	-1.90735	NA	NA

## Sheet: Beta_DEGs_Lawlor_Wang_Overlap
Gene_symbol	fold_change_in_Lawlor_et_al_2016	fold_change_in_Wang_et_al_2016	rank_test_pvals_in_Wang_et_al_2016
DLK1	4.02915	3.44801	1.30609e-05
HIST1H1E	-3.16596	-2.27451	0.00026527
SYT13	2.2736	3.0411	0.000921352
GALNT1	-5.49516	-2.24915	0.00127455
SLC39A4	-3.05912	-1.83463	0.00301575
DOCK6	-2.58894	-103.133	0.00310603
ORAOV1	-1.86042	-16.7667	0.00704243
SP100	2.01356	3.74761	0.00895163
GNAS	1.42511	2.5955	0.0110183
TANC2	-2.90475	-1.27823	0.0122007
BRWD1	2.42907	7.90365	0.015655
ERO1LB	1.88971	2.00266	0.0160433
SNRNP200	-2.1263	-1.07817	0.0160433
CHGA	2.90228	1.4004	0.0194618
TUBGCP6	1.77186	1.56781	0.0219039
F11	-16.4852	-4.09915	0.0219039
SPP1	26.4791	1.84385	0.0282188
TUBB	-2.4227	-1.91693	0.0282188
SLC38A6	-4.05891	-14.0391	0.028863
TSC2	1.71347	1.57273	0.0301891
TMEM130	3.77187	2.5734	0.0409986
VRK3	-1.90036	-1.38709	0.0455733
ACADSB	-2.18612	-1.1178	0.0495324

## Sheet: Beta_DEGs_Lawlor_Segerstolpe_Ov
Gene_symbol	fold_change_in_Lawlor_et_al_2016	fold_change_in_Segerstolpe _et_al_2016	rank_test_pvals_in_Segerstolpe _et_al_2016
CPE	1.61613	2.32089	4.91762e-25
INS	-1.45365	-2.50686	1.40344e-19
DLK1	4.02915	3.9461	2.11541e-17
TTR	-2.60991	-2.224	1.02253e-13
RPL35	-1.44262	-1.92924	2.7326e-13
SCG2	1.98092	2.87905	6.76691e-13
ANP32A	3.94064	1.83723	8.89635e-12
GLS	2.38125	2.28052	1.36702e-11
OAZ1	-1.56421	-1.32714	1.65942e-10
DGKB	5.11152	8.75183	1.91671e-10
BRWD1	2.42907	2.42074	4.81898e-10
SYT13	2.2736	1.7703	9.50951e-10
ERO1LB	1.88971	1.49472	2.50141e-09
RPS15	-1.49324	-1.75491	3.49715e-09
GNAS	1.42511	1.37035	6.90721e-09
PLAC8	4.75538	3.33851	7.1087e-09
NFIA	5.69433	2.5394	1.6726e-08
IPO8	2.31679	4.01067	1.88246e-08
ATG10	3.15912	2.59599	2.26004e-08
FTL	-2.59609	-2.3236	8.95275e-08
RPL36	-1.4154	-1.4925	9.6424e-07
KDSR	2.59182	1.75801	1.20802e-06
ZNF260	5.0443	2.41438	1.80966e-06
NDUFB8	-1.66056	-1.74733	2.27452e-06
ADSSL1	2.9563	2.42932	4.11611e-06
SP100	2.01356	2.04916	5.14601e-06
SYT17	3.28174	1.75044	9.56497e-06
ARHGAP29	2.96869	2.64595	1.01284e-05
KIAA1456	1.94156	2.06122	1.64492e-05
UNC45A	2.34871	1.17751	2.24991e-05
ABCF2	6.36692	1.46956	2.67474e-05
RBFOX3	2.51674	1.25673	3.17907e-05
CHGA	2.90228	1.38821	3.39531e-05
UBAC2	2.74345	1.50816	6.3896e-05
DBT	4.04475	1.37928	7.70703e-05
ZNF3	5.25597	1.32239	0.000246376
NUP43	2.13956	1.495	0.000294802
ALDOA	-1.65931	-1.20429	0.000392435
TUBGCP6	1.77186	1.21504	0.000411585
STAT5B	1.95367	2.01933	0.000444668
SETDB2	2.54465	1.91292	0.000530323
CNOT10	2.56387	1.32605	0.000601327
SUCO	2.90045	1.38346	0.000661662
TMEM130	3.77187	2.76029	0.000894408
DTWD2	2.61718	2.77109	0.0009527
EXOC2	10.2122	1.03795	0.00118141
KREMEN1	1.70264	1.62958	0.00161697
C19orf66	1.76211	1.27205	0.00185953
ZFP30	4.1352	2.12305	0.0019126
CRYZL1	-1.93473	-1.32656	0.00204297
C11orf31	-2.3491	-1.28691	0.00228381
COX4I1	-1.71497	-1.14378	0.00280104
RNFT2	1.92401	1.81765	0.00344934
MPDU1	1.59168	1.40245	0.00394214
VRK3	-1.90036	-1.03336	0.00479937
ZNF839	2.4559	1.297	0.0057964
ADAT1	3.19774	1.12913	0.00713833
DNASE1	-2.18695	-1.07186	0.00745928
MR1	2.26365	1.71846	0.00772936
TSC2	1.71347	1.13536	0.0116171
RPL32	-1.49825	-1.40962	0.0130857
NUDT22	-1.90882	-1.04424	0.0148914
AP2A2	1.73163	1.04181	0.0179959
FARSB	-3.70847	-1.04774	0.0185566
PEAK1	2.14198	8.68943	0.0193797
ACTR3C	3.44131	1.1968	0.0197676
ZNF793	1.43208	3.30856	0.0206101
RPL37	-1.72936	-1.27016	0.0225844
FRMPD1	1.6965	3.65719	0.0275679
KANK1	1.82091	2.19979	0.0310517
KRT8	-2.33302	-1.20259	0.0378041
HSPA5	-3.29639	-1.21432	0.0407677
MRPS18B	-3.26962	-1.02306	0.0426521
SIN3B	1.69278	1.07444	0.0428411

## Sheet: Beta_DEGs_All_studies
Gene_symbol	fold_change_in_Lawlor_et_al_2016	fold_change_in_Wang_et_al_2016	rank_test_pvals_in_Wang_et_al_2016	fold_change_in_Segerstolpe _et_al_2016	rank_test_pvals_in_Segerstolpe _et_al_2016
DLK1	4.02915	3.44801	1.30609e-05	3.9461	2.11541e-17
SYT13	2.2736	3.0411	0.000921352	1.7703	9.50951e-10
SP100	2.01356	3.74761	0.00895163	2.04916	5.14601e-06
GNAS	1.42511	2.5955	0.0110183	1.37035	6.90721e-09
BRWD1	2.42907	7.90365	0.015655	2.42074	4.81898e-10
ERO1LB	1.88971	2.00266	0.0160433	1.49472	2.50141e-09
CHGA	2.90228	1.4004	0.0194618	1.38821	3.39531e-05
TUBGCP6	1.77186	1.56781	0.0219039	1.21504	0.000411585
TSC2	1.71347	1.57273	0.0301891	1.13536	0.0116171
TMEM130	3.77187	2.5734	0.0409986	2.76029	0.000894408
VRK3	-1.90036	-1.38709	0.0455733	-1.03336	0.00479937

## Sheet: Alpha_DEGs_in_Wang_et_al_2016
Gene_symbol	fold_change_in_Lawlor_et_al_2016	fold_change_in_Wang_et_al_2016	rank_test_pvals_in_Wang_et_al_2016
HLA-G	-2.18955	1.35174	4.02629e-07
AS3MT	1.82159	-5.05913	9.20392e-07
HLA-B	1.78669	2.52119	1.9103e-06
B2M	1.46513	2.05271	1.99456e-06
BNIPL	1.7445	-1.72477	6.94287e-06
ARMC9	2.0038	-4.73196	6.93955e-05
WDR66	-1.47926	-1.76188	0.000107165
SLC5A5	1.47704	-1.05407	0.000277374
BIRC5	1.61761	1.00062	0.000366726
BEX1	-1.62445	1.74153	0.000447013
NISCH	2.79364	1.61456	0.000456882
C1orf106	-2.1107	1.08964	0.000498428
ZNF568	-2.34065	1.77738	0.000756315
FAM101B	2.76738	-1.1836	0.00102322
WDR73	-1.90181	2.07426	0.0011109
LAMP1	2.18998	2.57228	0.00150523
ZNF583	2.1301	-1.00002	0.00238834
TTC39C	-2.19221	-5.02176	0.00419859
ZNF555	2.10742	2.80809	0.00472691
TGM2	2.07712	-1.88638	0.00570846
WWTR1	2.50934	-1.16294	0.00867418
NT5DC3	-2.21398	2.81706	0.00944298
PHLDB1	1.91351	1.10418	0.010533
ZNF200	1.70903	-1.90411	0.010533
CHRNB1	-1.82868	-1.05066	0.0106213
ZC3H6	2.5491	3.14073	0.0120273
C8orf44	-2.06559	1.35207	0.0142722
PAK4	1.64262	3.62191	0.0143878
ZNF532	2.40503	-1.74444	0.0166139
CD36	4.91359	1.64973	0.016746
SRP68	-4.25945	2.82967	0.0192864
TRPM6	1.65791	8.7655	0.0226704
H3F3B	-1.47723	1.47845	0.0252031
SLC35A3	1.90865	7.31548	0.0286048
FRMD4B	-2.76779	-4.61769	0.0343221
HIST1H4C	1.68405	1.0998	0.0353221
SMYD4	1.79066	13.9701	0.0368685
PSTK	-1.78836	1.58339	0.0415667
ACVR1	-7.46797	-3.68457	0.0497272
COG1	-2.08051	-2.00322	0.0532049
DCTN5	-1.85244	1.16892	0.0535636
GPX3	-1.44876	1.47436	0.0557584
ZNF528	-2.33804	2.02084	0.0568836
CDH18	-4.17314	-1.60861	0.0611721
TUBGCP5	-4.19087	1.25232	0.067014
PIK3CB	-4.49894	-1.68827	0.0692087
LPIN3	-3.15326	7.01344	0.0795769
SNUPN	-1.99692	1.38288	0.0911741
SMARCA4	-2.00928	2.42564	0.106591
SPAST	1.89803	1.04663	0.107223
SERPINB9	2.15684	-1.1926	0.10978
RNF220	2.53628	1.24084	0.111729
C11orf57	1.75795	-1.16993	0.126871
GALNT10	-1.89514	1.09633	0.133507
SS18	-2.76116	-2.01551	0.137308
ACTB	-1.71581	1.0193	0.162764
BCKDHB	2.3482	1.77851	0.171692
ELP3	-4.83755	1.70594	0.179095
HELLS	-2.22476	1.59564	0.186733
ZC3HAV1	1.84098	1.062	0.208972
KBTBD2	2.22644	1.77952	0.217517
MOSPD2	2.40677	1.15481	0.218603
EPN2	-3.00438	-2.18222	0.220785
RPAP1	-2.36904	-2.1598	0.222984
KLB	-3.50357	1.53976	0.22631
SPG21	2.0853	1.25389	0.236503
LYZ	1.67811	2.71331	0.311356
RFT1	-2.30176	22.243	0.31554
ZNF766	-2.19185	2.31887	0.325445
ARNT2	2.89268	6.15786	0.34437
TMEM236	-3.62521	1.35115	0.357875
ZNF37A	-2.28321	1.65012	0.359396
RBBP5	-2.27264	-1.12	0.373266
FARP1	-1.70713	-1.2086	0.381113
RBM33	-5.28437	1.15901	0.38587
DPF2	-1.70291	1.3919	0.405255
PRKAA1	2.20001	1.13495	0.430289
NPAS2	-3.10757	-1.7203	0.431989
GNL3L	1.77026	1.07039	0.449204
ZNF430	-2.29202	1.10901	0.449204
SPRYD3	-3.58874	1.10448	0.452693
ZCCHC9	-2.52846	1.06831	0.454443
KLHL24	2.14122	-1.18578	0.461482
OTUD6B	-5.01888	3.67759	0.461482
CERS5	-2.50179	1.57942	0.48115
SOD2	5.33072	-1.22246	0.488414
TEP1	-2.26227	1.21289	0.490239
LASP1	-2.4464	-1.03392	0.499419
PLEKHH3	-1.60984	4.5289	0.537034
SSH2	-1.80487	2.71677	0.537034
CTNNB1	1.53388	1.23072	0.574041
PRSS23	1.78236	-1.13767	0.576021
ALG11	-2.02411	2.60447	0.585973
DDX19A	2.22439	2.11493	0.593991
LRTOMT	-1.65778	-1.21016	0.608143
GNAS	-1.59015	1.12144	0.616296
OGDH	-1.72293	1.15274	0.634814
TBL1XR1	1.77188	1.97958	0.638961
PGPEP1	1.95188	-1.03443	0.653564
GALM	-1.8469	2.49434	0.657761
WDR45	2.14612	4.53936	0.702459
SHC1	1.80384	1.69359	0.73504
YEATS2	-2.75263	9.11807	0.746011
HUS1	-2.48423	-1.03286	0.754825
ATP2A2	-2.21685	-1.06705	0.763671
SOX6	2.35957	1.40784	0.803845
MORC3	-2.35883	-1.06235	0.817358
OGFOD1	-1.92398	1.51892	0.821874
NGLY1	2.41509	-1.22708	0.826397
C14orf132	-3.04711	1.30868	0.835459
TBC1D20	2.34706	2.14574	0.839999
PPFIBP1	2.27877	1.49894	0.844544
FAM118A	-5.38026	-1.5507	0.846818
LIN52	-3.28281	3.0764	0.874204
NT5C2	-3.1404	1.3922	0.881076
RNF14	-2.5052	1.65587	0.883368
TBC1D10B	1.98572	3.44987	0.894845
CXorf23	1.58041	1.02345	0.910949
STK25	2.05241	1.65906	0.934017
SLC31A1	-1.99156	1.50695	0.945573
POLR3GL	-4.67658	1.46779	0.954827
IRGQ	-1.8634	-1.23248	0.957141
GDA	-2.08715	1.38486	0.964086
PEX1	2.66822	1.11753	0.968717
KIAA0319L	2.89204	1.04941	0.982618
ZNF587	-2.12253	2.73165	0.987252

## Sheet: Alpha_DEGs_in_Segerstolpe_et_al
Gene_symbol	fold_change_in_Lawlor_et_al_2016	fold_change_in_Segerstolpe _et_al_2016	rank_test_pvals_in_Segerstolpe _et_al_2016
CD36	4.91359	1.99989	3.56848e-22
GDA	-2.08715	1.76505	9.09412e-17
CDH18	-4.17314	-3.65844	2.08009e-16
HLA-B	1.78669	1.29245	1.00285e-14
TGM2	2.07712	11.5949	1.11841e-14
MICU2	3.62836	1.1564	1.40458e-10
TBL1XR1	1.77188	1.25894	1.78013e-10
GINM1	-1.81944	1.42397	2.50347e-10
SPG21	2.0853	1.38204	2.83701e-09
TMEM236	-3.62521	-1.00262	3.54055e-09
ZNF37A	-2.28321	1.3718	3.55879e-08
PPFIBP1	2.27877	2.30505	3.91633e-08
RBBP5	-2.27264	1.51001	4.86394e-08
NT5C2	-3.1404	1.49364	5.1041e-08
PRKAA1	2.20001	1.3163	1.27905e-07
SRP68	-4.25945	1.29078	3.24755e-07
SS18	-2.76116	1.25905	3.58886e-07
ZNF587	-2.12253	1.34662	4.95119e-07
SLC35A3	1.90865	1.38441	6.25166e-07
RNF14	-2.5052	1.33418	8.50165e-07
FARP1	-1.70713	1.49468	1.05504e-06
GNAS	-1.59015	-1.26909	1.61536e-06
ZNF766	-2.19185	1.43206	1.85094e-06
KLB	-3.50357	-2.0288	2.37386e-06
ALG11	-2.02411	1.77385	4.56046e-06
SPRYD3	-3.58874	1.27501	4.78847e-06
ACVR1	-7.46797	1.77744	5.77784e-06
PIK3CB	-4.49894	1.25568	1.17302e-05
EPN2	-3.00438	1.38157	1.5789e-05
BCKDHB	2.3482	1.28883	2.54271e-05
B2M	1.46513	1.01936	2.55537e-05
DCTN5	-1.85244	1.3231	2.71698e-05
LPIN3	-3.15326	1.17143	3.33366e-05
SOX6	2.35957	1.27698	5.83215e-05
ZNF430	-2.29202	1.2342	6.95993e-05
MORC3	-2.35883	1.35594	8.65204e-05
USB1	-13.1945	1.35358	9.88655e-05
LASP1	-2.4464	1.11813	0.000121644
CXorf23	1.58041	1.35854	0.000175409
KIAA0319L	2.89204	1.17527	0.000201616
KBTBD2	2.22644	1.25964	0.000204203
ZC3HAV1	1.84098	1.12028	0.000249669
RPAP1	-2.36904	1.35356	0.00028054
SPAST	1.89803	1.36886	0.000407871
PEX1	2.66822	1.282	0.000441813
DPF2	-1.70291	1.23732	0.00046344
NGLY1	2.41509	1.0146	0.000467831
OGFOD1	-1.92398	-1.02623	0.000499073
ZNF568	-2.34065	1.30688	0.00050506
WDR66	-1.47926	7.27008	0.000560997
ELP3	-4.83755	1.3192	0.000578421
GNL3L	1.77026	1.24973	0.000715607
NT5DC3	-2.21398	-1.06277	0.000762279
RNF220	2.53628	1.07864	0.00116701
SOD2	5.33072	-1.19434	0.00120706
TBC1D20	2.34706	1.1231	0.00129686
ZC3H6	2.5491	1.25929	0.00183545
ACTB	-1.71581	1.24667	0.00194194
RBM33	-5.28437	1.05904	0.0021049
CERS5	-2.50179	-1.06357	0.0025649
WDR73	-1.90181	1.12699	0.00267255
YEATS2	-2.75263	1.23625	0.00296596
PLEKHH3	-1.60984	-1.58608	0.0029935
SERPINB9	2.15684	1.61952	0.00363271
SLC31A1	-1.99156	1.18057	0.00422308
PRSS23	1.78236	1.89643	0.00443361
NISCH	2.79364	-1.33996	0.00605083
KANSL3	-2.75576	1.18298	0.00703507
RFT1	-2.30176	1.21016	0.00762462
SHC1	1.80384	1.2379	0.00923403
POLR3GL	-4.67658	1.02732	0.00968249
TUBGCP5	-4.19087	1.32698	0.0103054
DESI1	2.13469	1.04123	0.011233
SMYD4	1.79066	1.7934	0.0119553
ZCCHC9	-2.52846	1.02229	0.0128613
DDX19A	2.22439	1.05629	0.0129813
GALNT10	-1.89514	1.7942	0.0130346
C14orf132	-3.04711	1.17261	0.0142718
HUS1	-2.48423	1.48086	0.0171955
GPX3	-1.44876	1.09008	0.0175942
HIST1H4C	1.68405	1.20755	0.0185555
KLHL24	2.14122	1.13426	0.0207965
PGPEP1	1.95188	1.12032	0.0230954
C8orf44	-2.06559	1.11284	0.0247968
LRTOMT	-1.65778	1.10199	0.0325703
CTNNB1	1.53388	-1.17806	0.033454
SSH2	-1.80487	-1.55389	0.0404433
TEP1	-2.26227	1.42811	0.0439062
OGDH	-1.72293	-1.01027	0.0591019
TTC39C	-2.19221	-1.42318	0.0648772
KANSL1L	2.56926	1.35301	0.0650092
MOSPD2	2.40677	1.70668	0.0721629
FRMD4B	-2.76779	1.4323	0.0724147
ZNF200	1.70903	1.60095	0.0877287
ZNF555	2.10742	1.04454	0.0935939
BEX1	-1.62445	1.04731	0.104617
C11orf57	1.75795	1.21085	0.111252
ARNT2	2.89268	-1.04394	0.122592
IRGQ	-1.8634	-1.09471	0.123746
TRPM6	1.65791	-2.21899	0.159207
HLA-G	-2.18955	-1.01921	0.166539
COG1	-2.08051	-1.09975	0.170137
ARMC9	2.0038	1.55364	0.175143
TBC1D10B	1.98572	-1.02526	0.176911
NPAS2	-3.10757	-1.03717	0.184566
ZNF528	-2.33804	1.31447	0.201262
CHRNB1	-1.82868	-1.06102	0.209061
LIN52	-3.28281	1.11239	0.23508
ATP2A2	-2.21685	-1.14955	0.240553
H3F3B	-1.47723	-1.15854	0.245202
OTUD6B	-5.01888	1.03358	0.254952
BIRC5	1.61761	-4.56788	0.329812
WWTR1	2.50934	1.95327	0.333623
YBX3	1.94991	1.51589	0.334083
PAK4	1.64262	-1.14043	0.345327
LYZ	1.67811	-5.9899	0.356202
WDR45	2.14612	-1.18432	0.364863
ZNF583	2.1301	-1.05809	0.397675
SNUPN	-1.99692	-1.07623	0.403999
ELP6	-2.66891	-1.32855	0.435264
PHLDB1	1.91351	-1.30496	0.575854
FAM101B	2.76738	2.99493	0.639512
C1orf106	-2.1107	-2.88636	0.711508
GALM	-1.8469	-1.22084	0.7167
PSTK	-1.78836	1.0032	0.749999
HELLS	-2.22476	-1.70113	0.750901
FAM118A	-5.38026	-1.07568	0.818418
SMARCA4	-2.00928	-1.09607	0.830323
STK25	2.05241	-1.18807	0.894047
ZNF532	2.40503	-1.36669	0.909267
LAMP1	2.18998	-1.09365	0.928653
BNIPL	1.7445	-1.09354	0.984544
AS3MT	1.82159	1.20972	0.998525
SLC5A5	1.47704	14.5429	1

## Sheet: Alpha_DEGs_Lawlor_Wang_Overlap
Gene_symbol	fold_change_in_Lawlor_et_al_2016	fold_change_in_Wang_et_al_2016	rank_test_pvals_in_Wang_et_al_2016
HLA-B	1.78669	2.52119	1.9103e-06
B2M	1.46513	2.05271	1.99456e-06
WDR66	-1.47926	-1.76188	0.000107165
BIRC5	1.61761	1.00062	0.000366726
NISCH	2.79364	1.61456	0.000456882
LAMP1	2.18998	2.57228	0.00150523
TTC39C	-2.19221	-5.02176	0.00419859
ZNF555	2.10742	2.80809	0.00472691
PHLDB1	1.91351	1.10418	0.010533
CHRNB1	-1.82868	-1.05066	0.0106213
ZC3H6	2.5491	3.14073	0.0120273
PAK4	1.64262	3.62191	0.0143878
CD36	4.91359	1.64973	0.016746
TRPM6	1.65791	8.7655	0.0226704
SLC35A3	1.90865	7.31548	0.0286048
FRMD4B	-2.76779	-4.61769	0.0343221
HIST1H4C	1.68405	1.0998	0.0353221
SMYD4	1.79066	13.9701	0.0368685
ACVR1	-7.46797	-3.68457	0.0497272

## Sheet: Alpha_DEGs_Lawlor_Segerstolpe
Gene_symbol	fold_change_in_Lawlor_et_al_2016	fold_change_in_Segerstolpe _et_al_2016	rank_test_pvals_in_Segerstolpe _et_al_2016
CD36	4.91359	1.99989	3.56848e-22
CDH18	-4.17314	-3.65844	2.08009e-16
HLA-B	1.78669	1.29245	1.00285e-14
TGM2	2.07712	11.5949	1.11841e-14
MICU2	3.62836	1.1564	1.40458e-10
TBL1XR1	1.77188	1.25894	1.78013e-10
SPG21	2.0853	1.38204	2.83701e-09
TMEM236	-3.62521	-1.00262	3.54055e-09
PPFIBP1	2.27877	2.30505	3.91633e-08
PRKAA1	2.20001	1.3163	1.27905e-07
SLC35A3	1.90865	1.38441	6.25166e-07
GNAS	-1.59015	-1.26909	1.61536e-06
KLB	-3.50357	-2.0288	2.37386e-06
BCKDHB	2.3482	1.28883	2.54271e-05
B2M	1.46513	1.01936	2.55537e-05
SOX6	2.35957	1.27698	5.83215e-05
CXorf23	1.58041	1.35854	0.000175409
KIAA0319L	2.89204	1.17527	0.000201616
KBTBD2	2.22644	1.25964	0.000204203
ZC3HAV1	1.84098	1.12028	0.000249669
SPAST	1.89803	1.36886	0.000407871
PEX1	2.66822	1.282	0.000441813
NGLY1	2.41509	1.0146	0.000467831
OGFOD1	-1.92398	-1.02623	0.000499073
GNL3L	1.77026	1.24973	0.000715607
NT5DC3	-2.21398	-1.06277	0.000762279
RNF220	2.53628	1.07864	0.00116701
TBC1D20	2.34706	1.1231	0.00129686
ZC3H6	2.5491	1.25929	0.00183545
CERS5	-2.50179	-1.06357	0.0025649
PLEKHH3	-1.60984	-1.58608	0.0029935
SERPINB9	2.15684	1.61952	0.00363271
PRSS23	1.78236	1.89643	0.00443361
SHC1	1.80384	1.2379	0.00923403
DESI1	2.13469	1.04123	0.011233
SMYD4	1.79066	1.7934	0.0119553
DDX19A	2.22439	1.05629	0.0129813
HIST1H4C	1.68405	1.20755	0.0185555
KLHL24	2.14122	1.13426	0.0207965
PGPEP1	1.95188	1.12032	0.0230954
SSH2	-1.80487	-1.55389	0.0404433

## Sheet: Alpha_DEGs_All_studies
Gene_symbol	fold_change_in_Lawlor_et_al_2016	fold_change_in_Wang_et_al_2016	rank_test_pvals_in_Wang_et_al_2016	fold_change_in_Segerstolpe _et_al_2016	rank_test_pvals_in_Segerstolpe _et_al_2016
HLA-B	1.78669	2.52119	1.9103e-06	1.29245	1.00285e-14
B2M	1.46513	2.05271	1.99456e-06	1.01936	2.55537e-05
ZC3H6	2.5491	3.14073	0.0120273	1.25929	0.00183545
CD36	4.91359	1.64973	0.016746	1.99989	3.56848e-22
SLC35A3	1.90865	7.31548	0.0286048	1.38441	6.25166e-07
HIST1H4C	1.68405	1.0998	0.0353221	1.20755	0.0185555
SMYD4	1.79066	13.9701	0.0368685	1.7934	0.0119553

[truncated: 3 more sheets: Delta_DEGs_in_Wang_et_al_2016, Delta_DEGs_in_Segerstolpe_et_al, Delta_DEGs_Lawlor_Segerstolpe]
