# Supplementary material for: Single-cell transcriptomes identify human islet cell signatures and reveal cell-type–specific expression changes in type 2 diabetes
Source: HighWire-hosted journal article supplement (doi:10.1101/gr.212720.116), 2016-11-18
Supplement: Supplemental_Fig_S1.pdf [file Supplemental_Fig_S1.pdf]

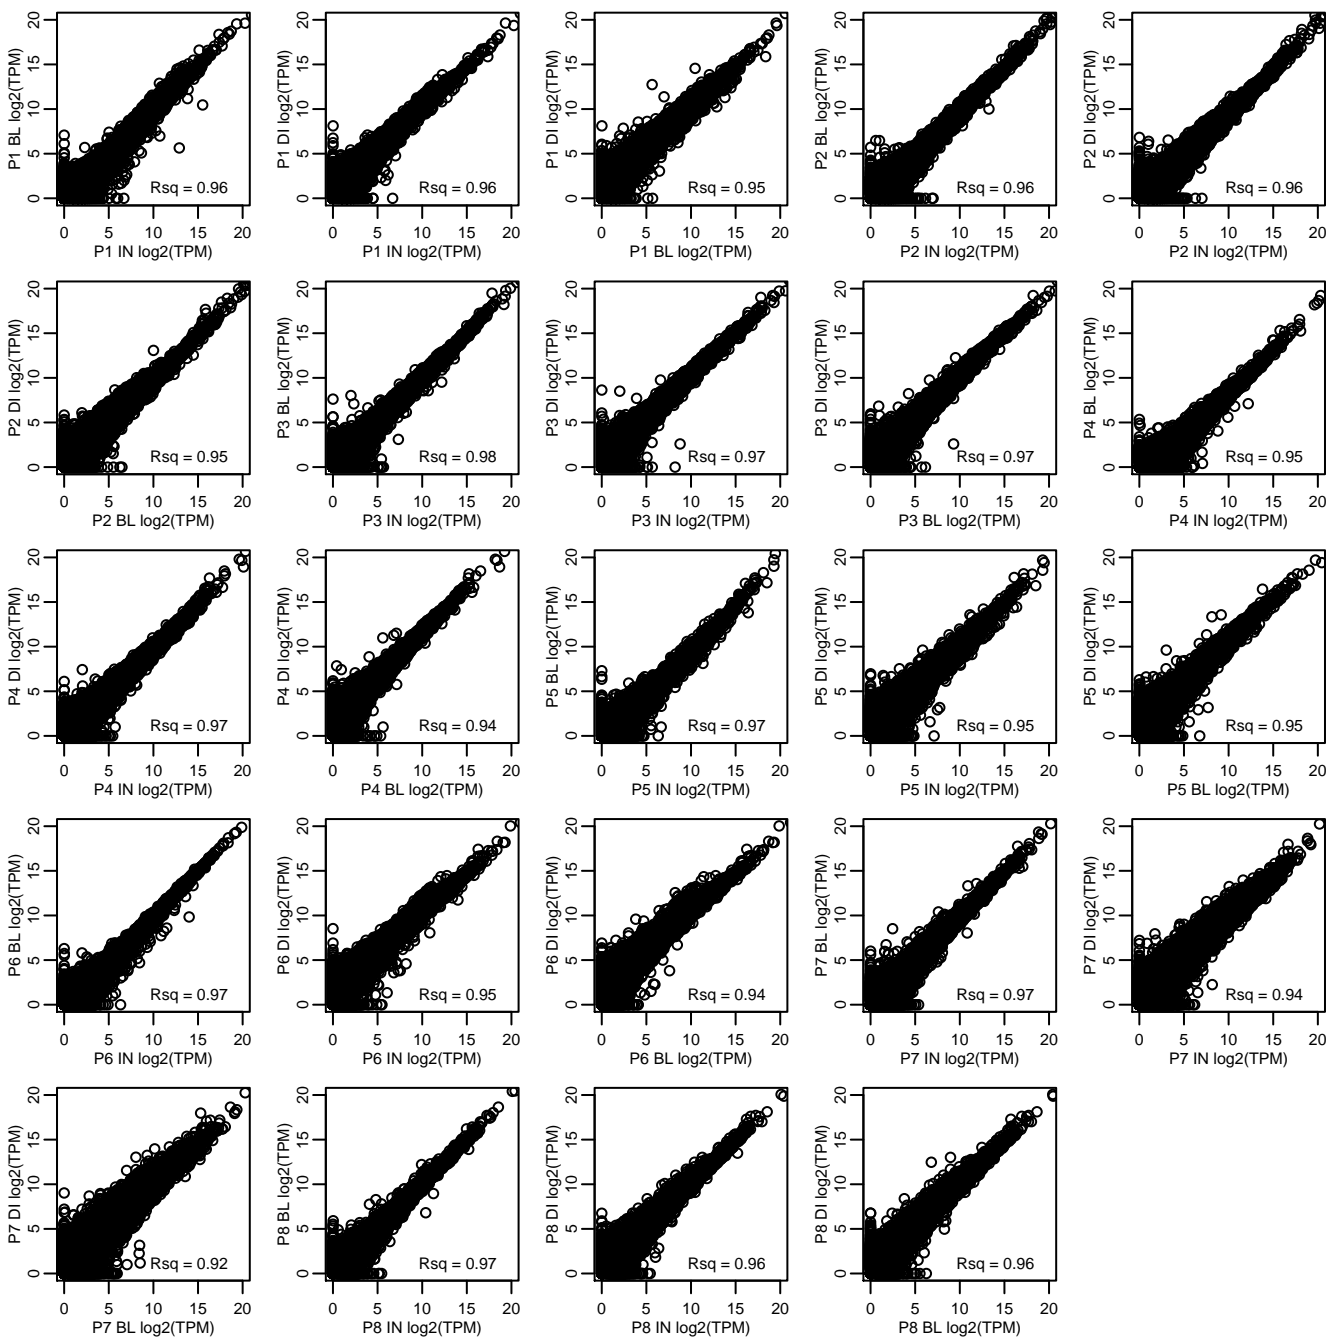

Supplemental\_Fig\_S1: Bulk baseline, intact, and dissociated transcriptomes within each patient islet correlate strongly regardless of experimental condition.

Correlation scatter plots comparing the average  $\log_2$ (TPM) gene expression of each patient islet bulk baseline, intact, and dissociated transcriptomes all demonstrate Pearson's R-squared values greater than 0.90. Processing and dissociation of islet samples did not drastically influence transcriptome profiles. IN = Bulk Intact, DI = Bulk Dissociated, BL = Bulk Baseline, P1 = Patient Donor 1, TPM = Transcripts per million, Rsq = Pearson's R-squared.
