# Supplementary material for: Single-cell transcriptomes identify human islet cell signatures and reveal cell-type–specific expression changes in type 2 diabetes
Source: HighWire-hosted journal article supplement (doi:10.1101/gr.212720.116), 2016-11-18
Supplement: Supplemental_Fig_S2.pdf [file Supplemental_Fig_S2.pdf]

**Coverage vs. Transcript Position  
(TPM 26–50th Percentile)**

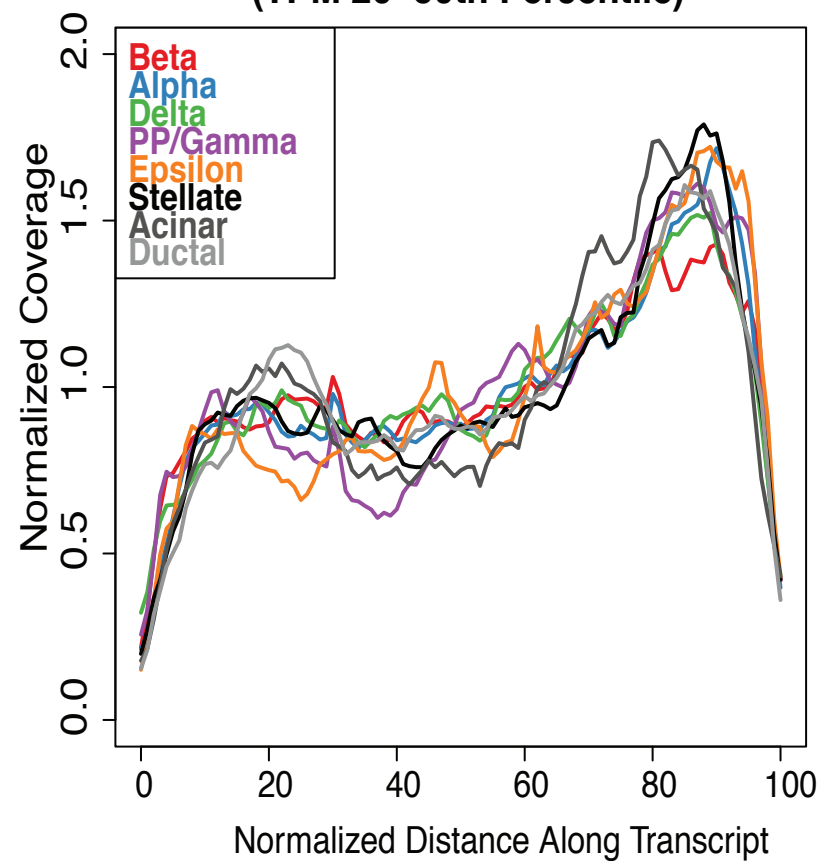

**Coverage vs. Transcript Position  
(TPM 51–75th Percentile)**

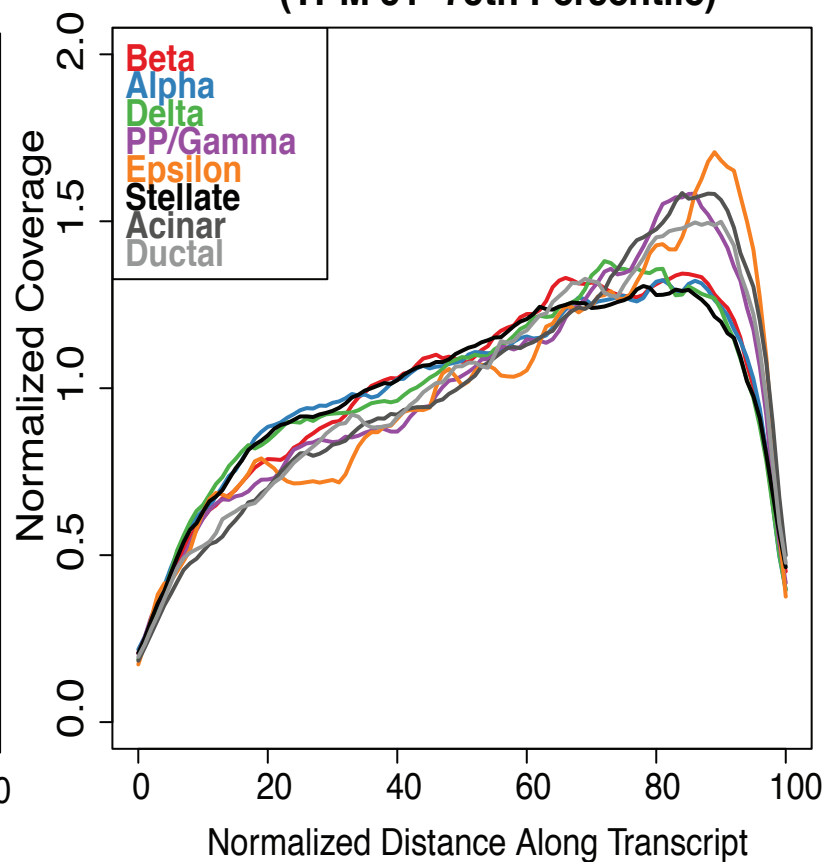

**Coverage vs. Transcript Position  
(TPM 76–100th Percentile)**

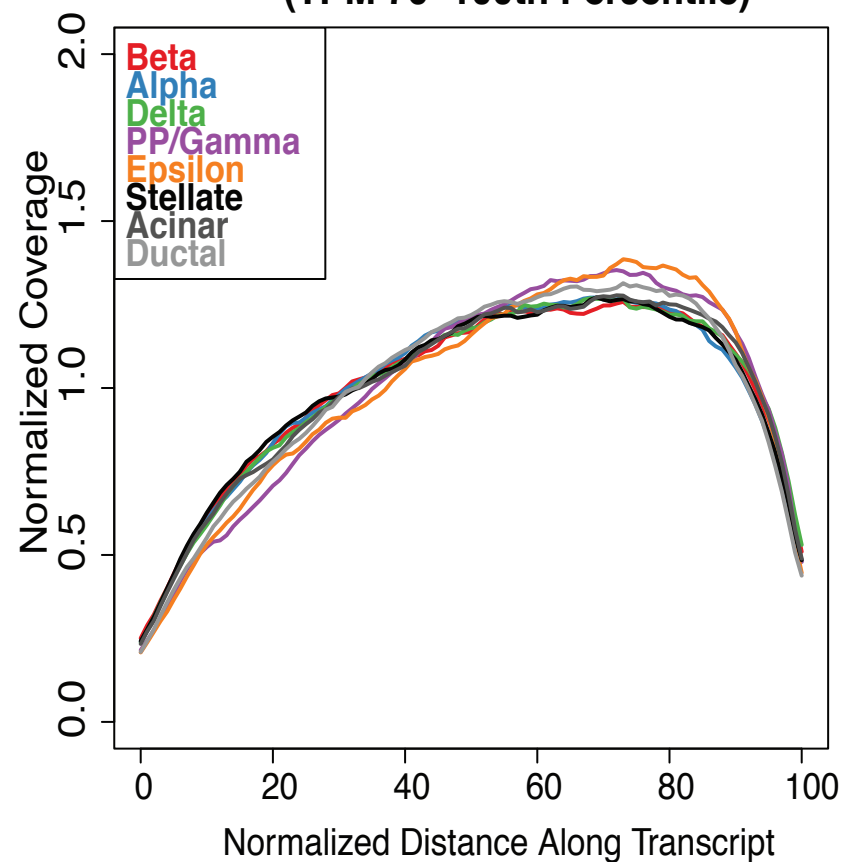

Supplemental\_Fig\_S2: Transcript coverage across single cell transcriptomes.

All genes were ranked by their  $\log_2$  transcript per million (TPM) expression level within each cell type and grouped into quartiles. Moderately expressed genes may be considered to reside in the 2nd (26 – 50th percentile) and 3rd (51 – 75th percentile) quartiles. We then used the program “CollectRNASeqMetrics” from Picard Tools (<https://broadinstitute.github.io/picard/command-line-overview.html>) to obtain and plot the normalized transcript coverage (y-axis) as a function of normalized transcript length (x-axis).
