# Supplementary material for: Single-cell transcriptomes identify human islet cell signatures and reveal cell-type–specific expression changes in type 2 diabetes
Source: HighWire-hosted journal article supplement (doi:10.1101/gr.212720.116), 2016-11-18
Supplement: Supplemental_Fig_S4.pdf [file Supplemental_Fig_S4.pdf]

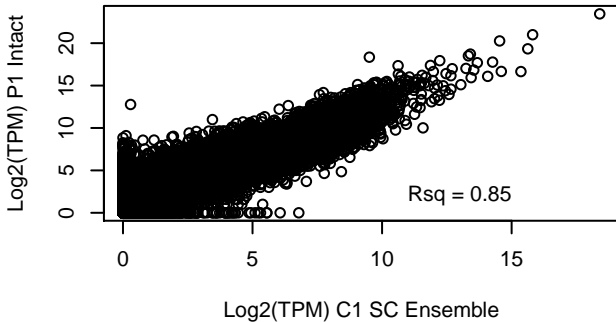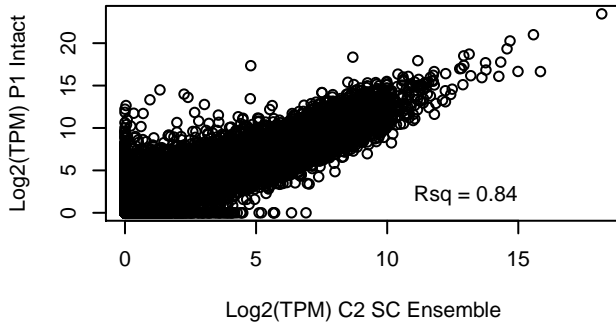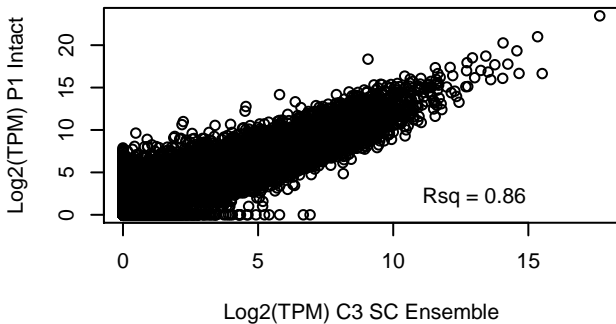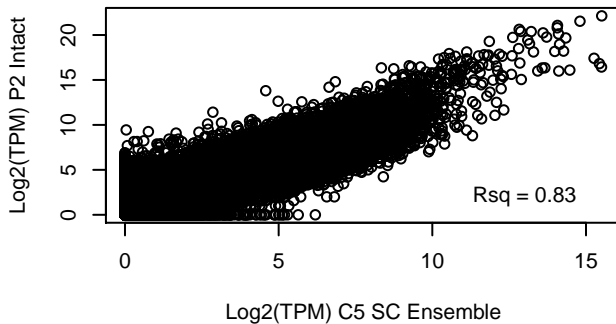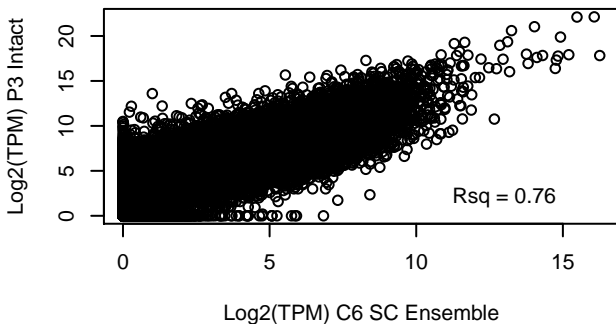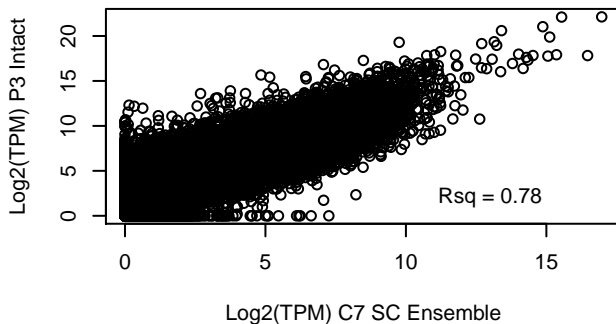

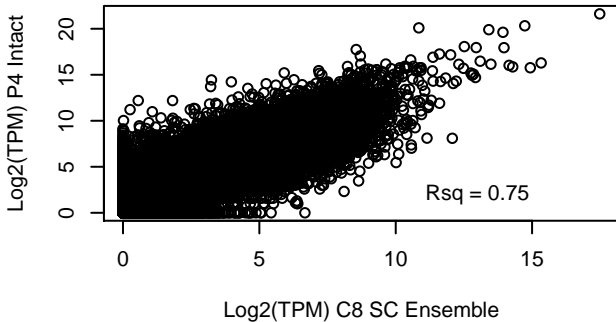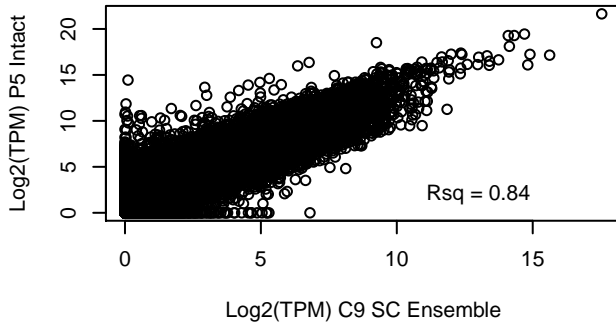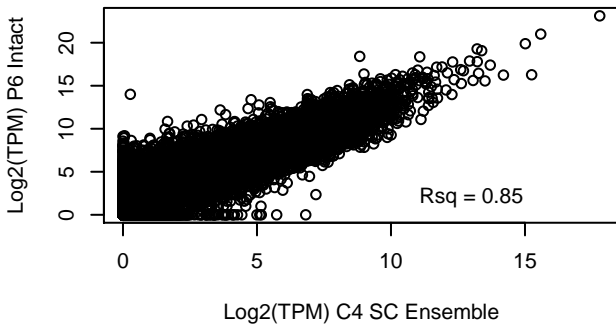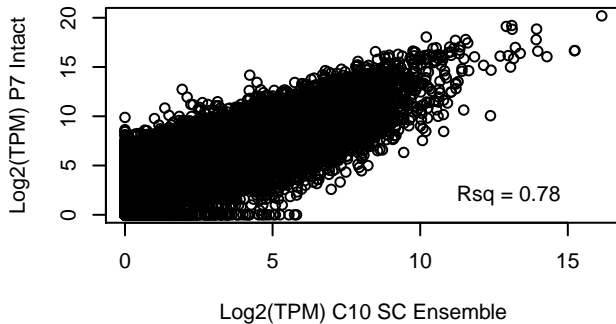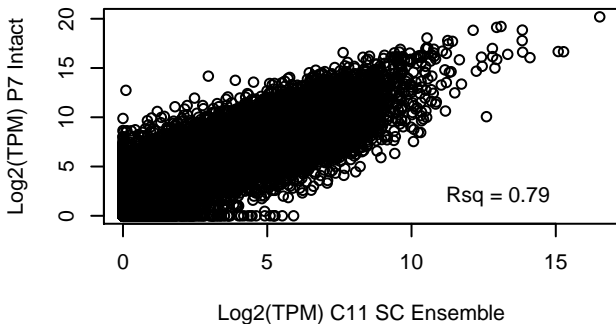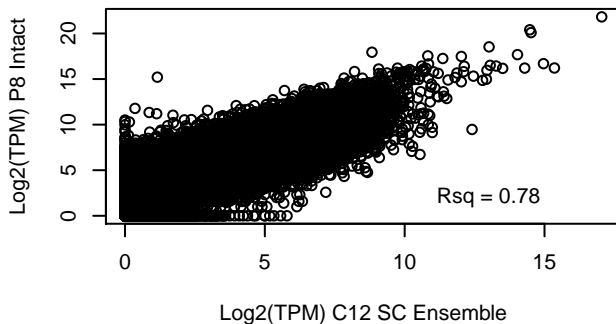

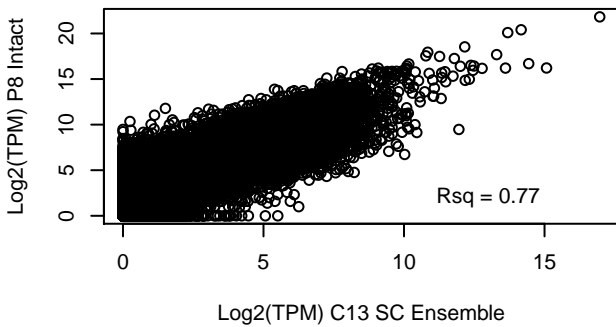

Supplemental\_Fig\_S4: Pairwise comparisons of patient bulk intact and ensemble single cell transcriptomes are highly correlated regardless of microfluidic chip preparation.

Scatter plots of average  $\log_2$ (TPM) expression of bulk intact and ensemble single cell transcriptomes for each patient islet. The C1, C2, etc, labels correspond to the single cell microfluidic chip preparation(s). Pearson's R-square values range from 0.75 to 0.86. TPM = Transcripts per million, Rsq = Pearson's R-squared, SC = Single cell ensemble, P = Patient Donor.
