# Supplementary material for: Single-cell transcriptomes identify human islet cell signatures and reveal cell-type–specific expression changes in type 2 diabetes
Source: HighWire-hosted journal article supplement (doi:10.1101/gr.212720.116), 2016-11-18
Supplement: Supplemental_Fig_S5.pdf [file Supplemental_Fig_S5.pdf]

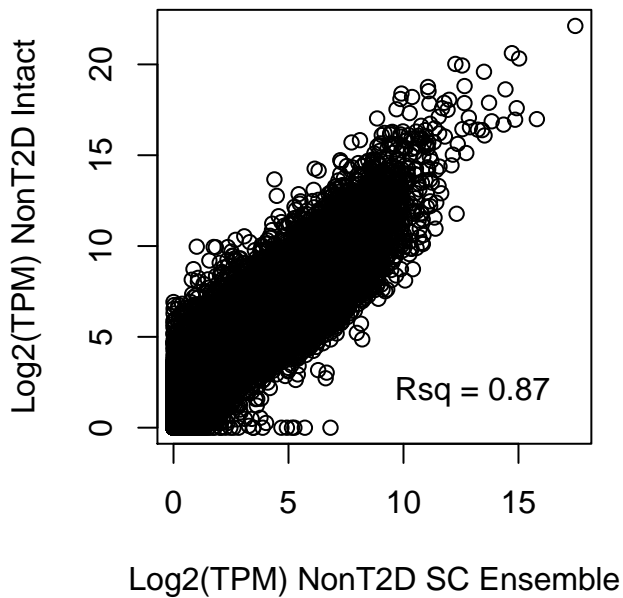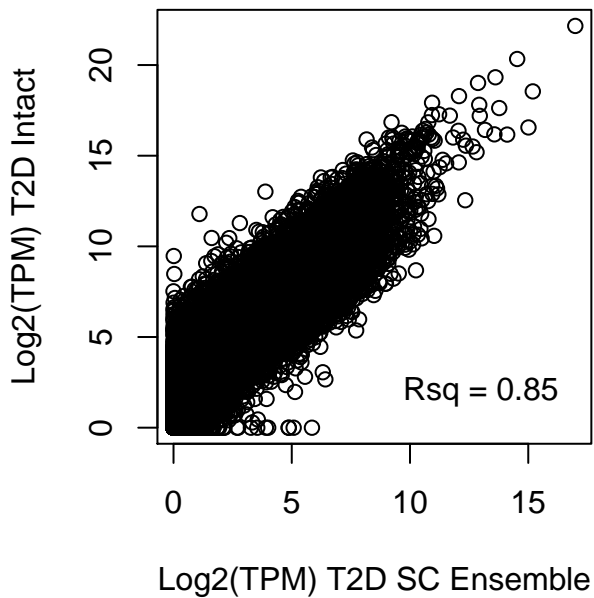

Supplemental\_Fig\_S5: Correlation of patient bulk intact and ensemble single cell transcriptomes is not influenced by disease state.

Correlation scatter plots of average  $\log_2$ (TPM) gene expression of bulk intact and ensemble single cell transcriptomes from non-diabetic islets and those from Type 2 diabetic islets. The similar Pearson's R-squared values observed suggest that the correlation between bulk and single cell transcriptomes was not affected by disease state. TPM = Transcripts per million, Rsq = Pearson's R-squared, NonT2D = non-diabetic, T2D = Type 2 diabetic, SC = Single cell.
