# Supplementary material for: Single-cell transcriptomes identify human islet cell signatures and reveal cell-type–specific expression changes in type 2 diabetes
Source: HighWire-hosted journal article supplement (doi:10.1101/gr.212720.116), 2016-11-18
Supplement: Supplemental_Fig_S7.pdf [file Supplemental_Fig_S7.pdf]

**A**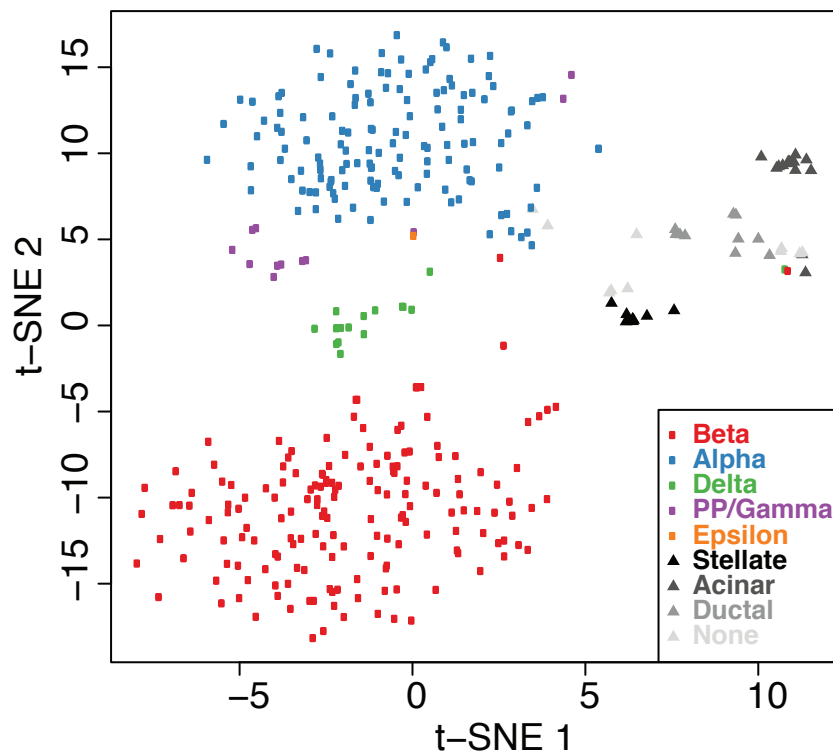**B**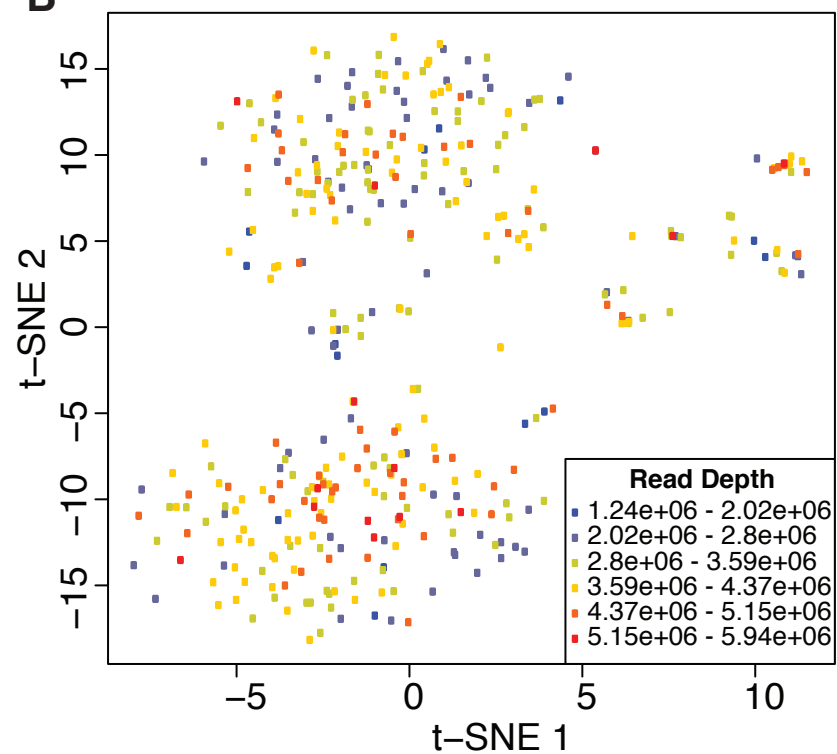**C**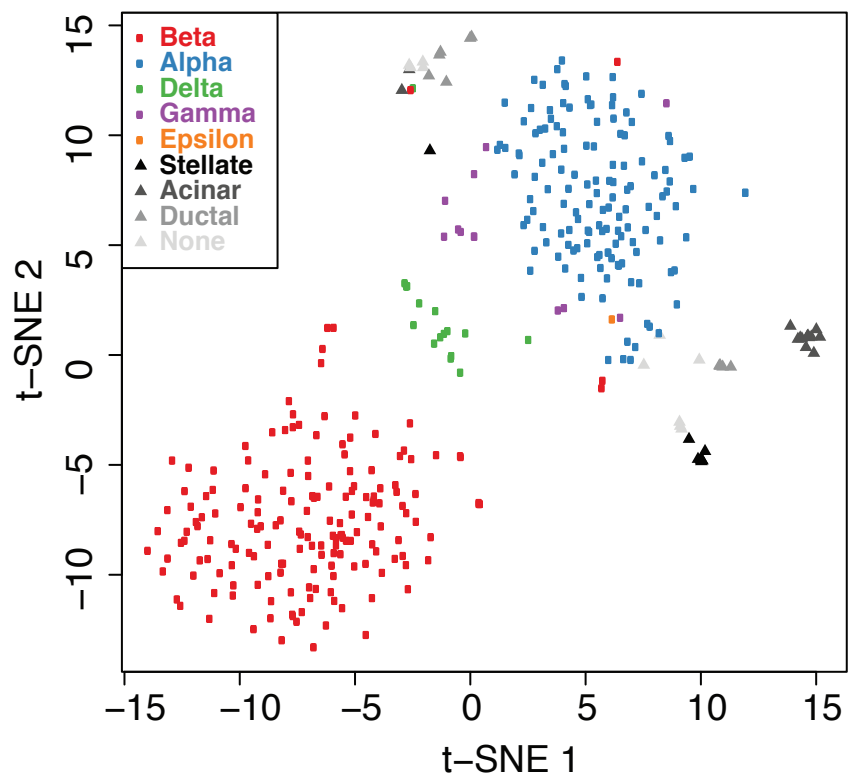

Supplemental\_Fig\_S7: Reduction of non-diabetic single cell transcriptomes to two dimensions by unsupervised t-SNE separates samples by cell type regardless of marker gene expression or sequencing depth.

(A) Scatter plot of non-diabetic single cell transcriptomes in two dimensions after unsupervised t-SNE with 1824 of the most highly expression genes ( $\log_2(\text{CPM}) > 10.5$ ) in at least one sample as shown in Figure 3A of the manuscript. (B) Scatter plot of the same t-SNE analysis with each cell shaded by their respective sequencing depth (number of reads). (C) Scatter plot of non-diabetic single cell samples in two dimensions after unsupervised t-SNE and excluding marker genes (*INS*, *GCG*, *SST*, *PPY*, *GHRL*, *COL1A1*, *PRSS1*, and *KRT19*). 1816 highly expressed genes with  $\log_2(\text{CPM}) > 10.5$  were used to conduct the t-SNE analysis. The color labels remain the same as seen in Figure 3A.
