# Supplementary material for: Single-cell transcriptomes identify human islet cell signatures and reveal cell-type–specific expression changes in type 2 diabetes
Source: HighWire-hosted journal article supplement (doi:10.1101/gr.212720.116), 2016-11-18
Supplement: Supplemental_Fig_S8.pdf [file Supplemental_Fig_S8.pdf]

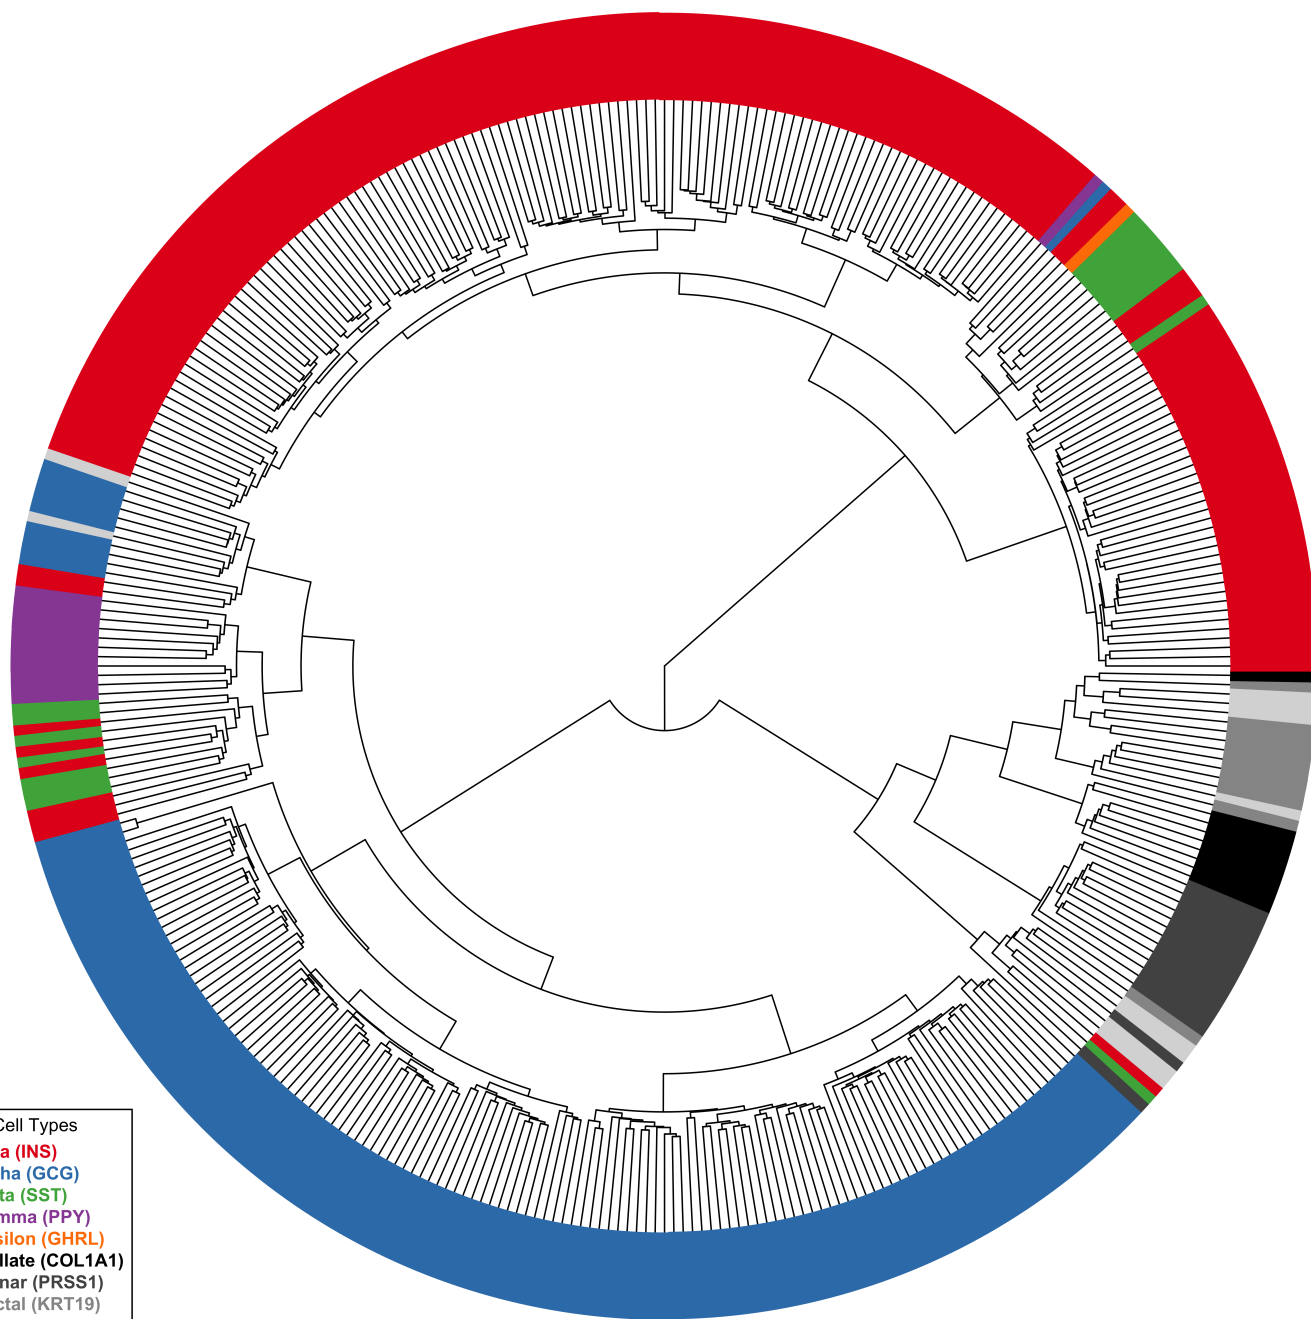

Cell Types

Beta (INS)  
Alpha (GCG)  
Delta (SST)  
Gamma (PPY)  
Epsilon (GHRL)  
Stellate (COL1A1)  
Acinar (PRSS1)  
Ductal (KRT19)  
None

Supplemental\_Fig\_S8: Unsupervised hierarchical clustering of non-diabetic single cell transcriptomes is not driven by marker gene expression.

Circular dendrogram illustrates unsupervised clustering of samples by cell type even after excluding marker genes (*INS*, *GCG*, *SST*, *PPY*, *GHRL*, *COL1A1*, *PRSS1*, and *KRT19*) from analysis. 1816 highly expressed genes with  $\log_2(\text{CPM}) > 10.5$  were used in the analysis and the color labels remained the same as shown in Figure 3B.
