# Supplementary material for: Single-cell transcriptomes identify human islet cell signatures and reveal cell-type–specific expression changes in type 2 diabetes
Source: HighWire-hosted journal article supplement (doi:10.1101/gr.212720.116), 2016-11-18
Supplement: Supplemental_Fig_S10.pdf [file Supplemental_Fig_S10.pdf]

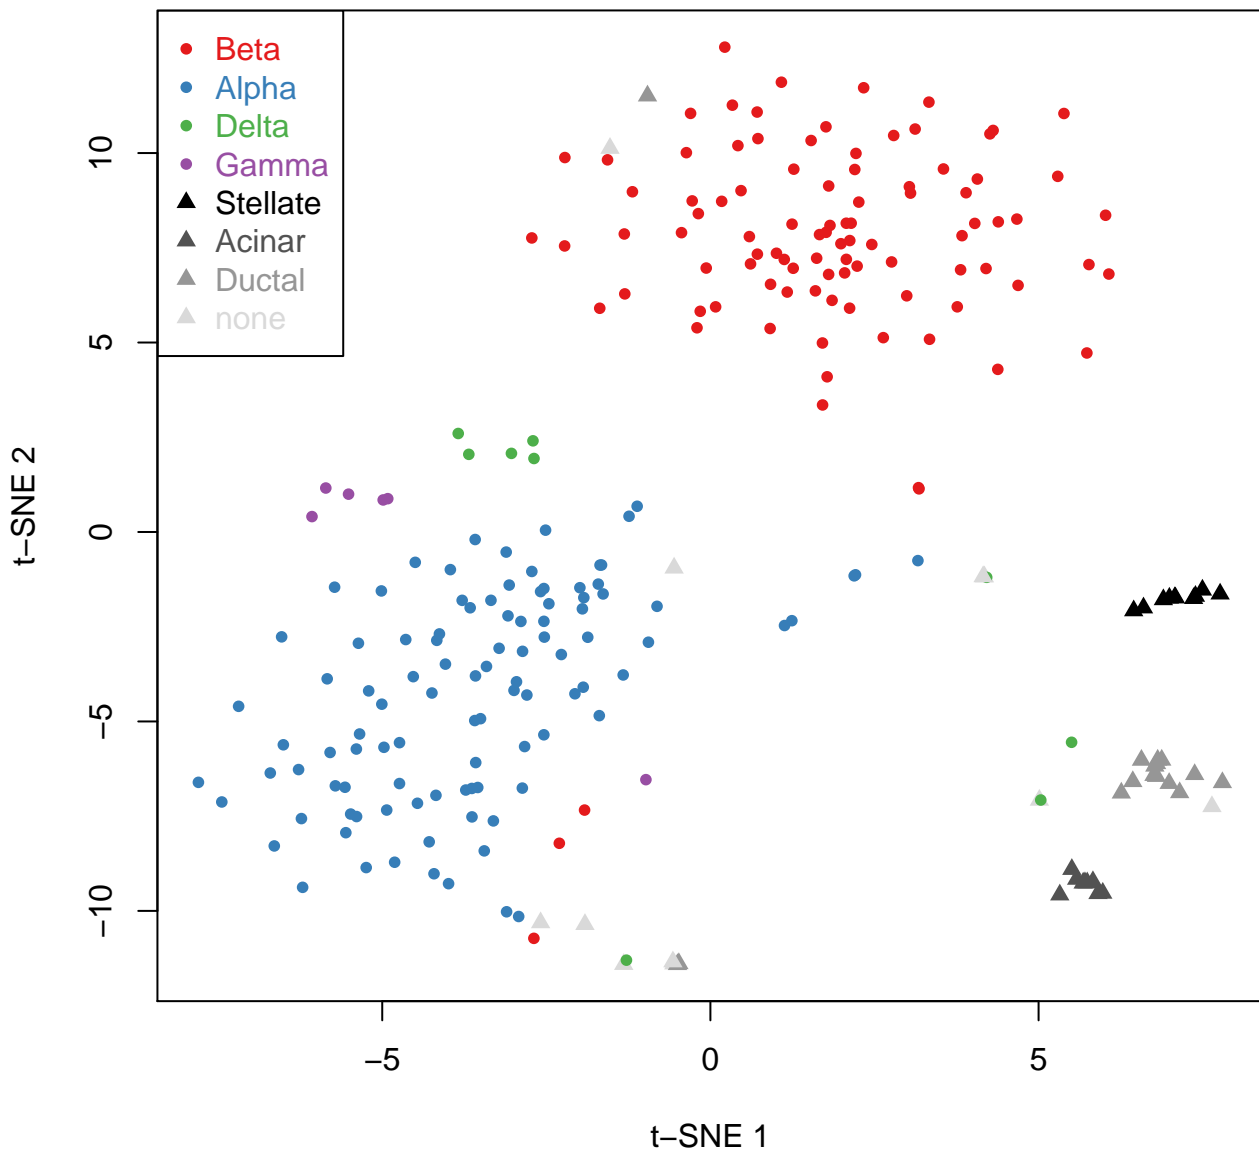

Supplemental\_Fig\_S10: Single cell transcriptomes from Type 2 diabetic islets group by cell type after reduction to two dimensions by unsupervised t-SNE.

Scatter plot of Type 2 diabetic single cells in two dimensions after t-SNE analysis highlights the similarity of cell types based on their transcriptome profiles. 1908 highly expressed genes with  $\log_2(\text{CPM}) > 10.5$  were used in the t-SNE analysis. Similar to Figure 3A, Endocrine cells (Beta, Alpha, Delta, and PP/gamma) are labeled by a circle while Exocrine (Acinar, Ductal, and Stellate) and unlabeled (None) cells are labeled with a triangle.
