# Supplementary material for: Single-cell transcriptomes identify human islet cell signatures and reveal cell-type–specific expression changes in type 2 diabetes
Source: HighWire-hosted journal article supplement (doi:10.1101/gr.212720.116), 2016-11-18
Supplement: Supplemental_Fig_S12.pdf [file Supplemental_Fig_S12.pdf]

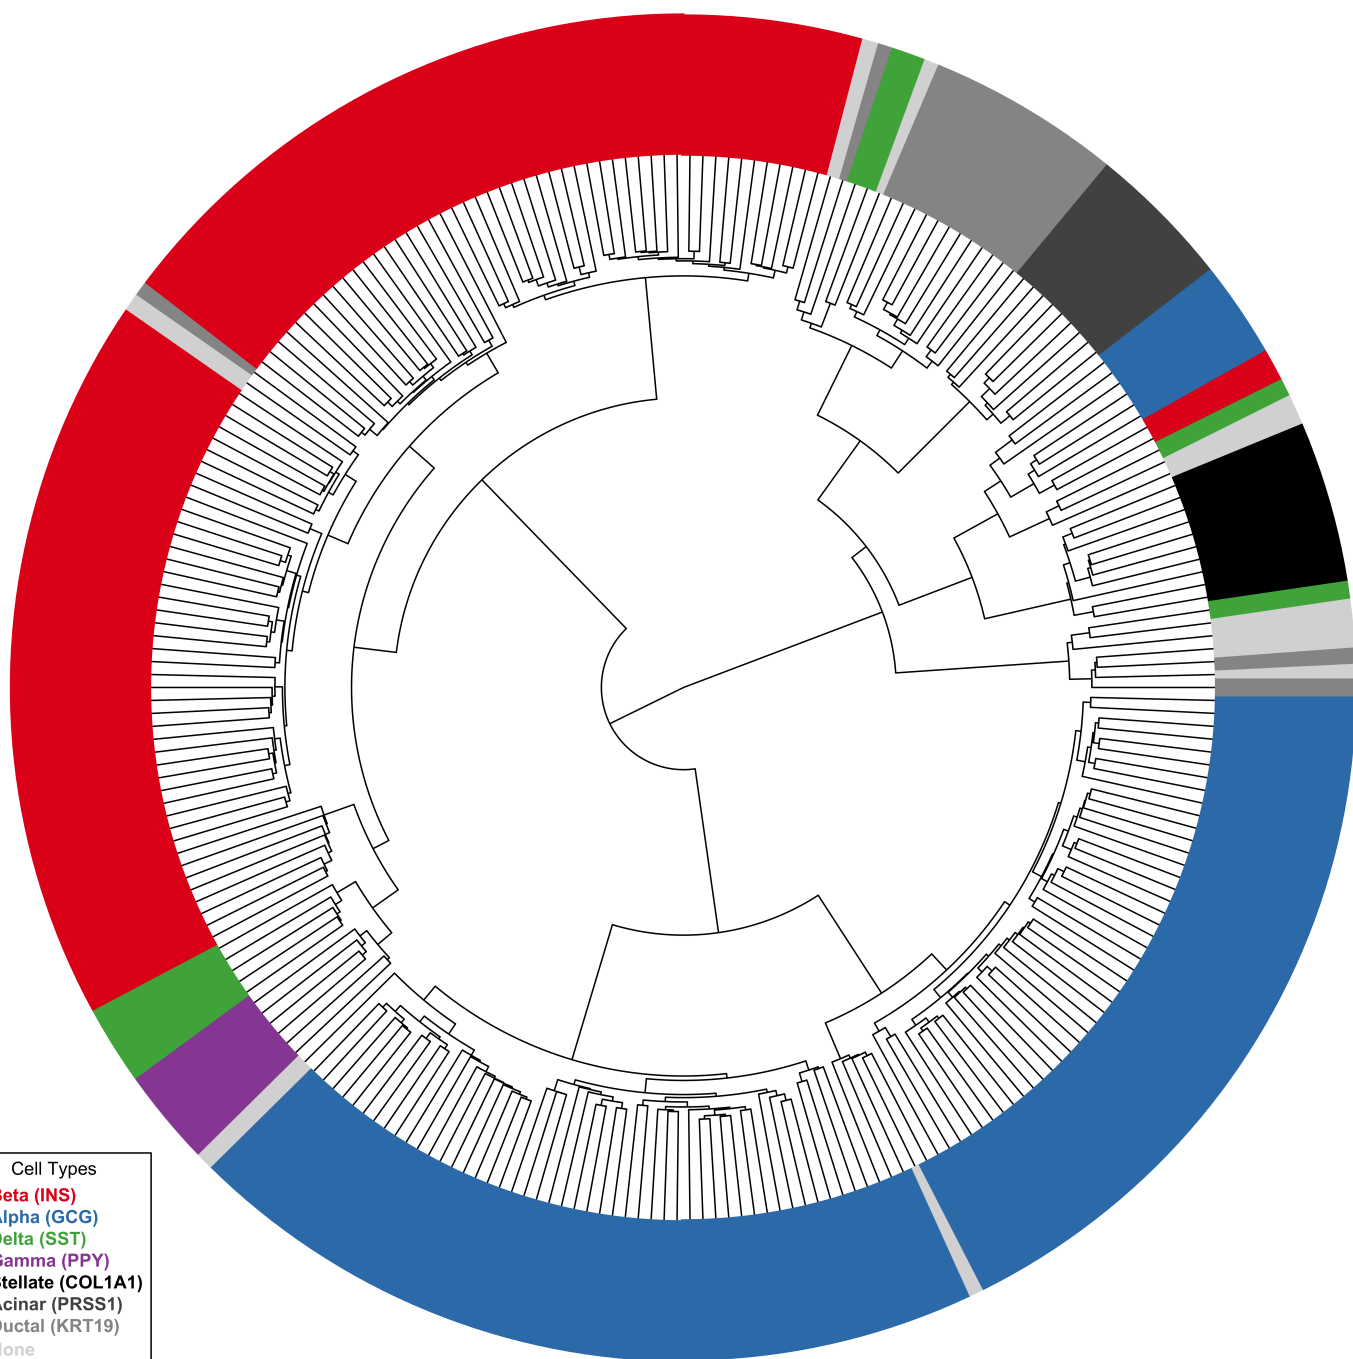

Cell Types

Beta (INS)  
Alpha (GCG)  
Delta (SST)  
Gamma (PPY)  
Stellate (COL1A1)  
Acinar (PRSS1)  
Ductal (KRT19)  
None

Supplemental\_Fig\_S12: Unsupervised hierarchical clustering of Type 2 diabetic single cell transcriptomes separates samples by cell type.

Circular dendrogram of Type 2 diabetic single cell transcriptomes illustrates similar clustering by cell type as observed in non-diabetic samples. 1908 highly expressed genes with  $\log_2(\text{CPM}) > 10.5$  were used in the analysis. Color labels are the same as shown in Figure 3B.
