# Supplementary material for: Single-cell transcriptomes identify human islet cell signatures and reveal cell-type–specific expression changes in type 2 diabetes
Source: HighWire-hosted journal article supplement (doi:10.1101/gr.212720.116), 2016-11-18
Supplement: Supplemental_Fig_S13.pdf [file Supplemental_Fig_S13.pdf]

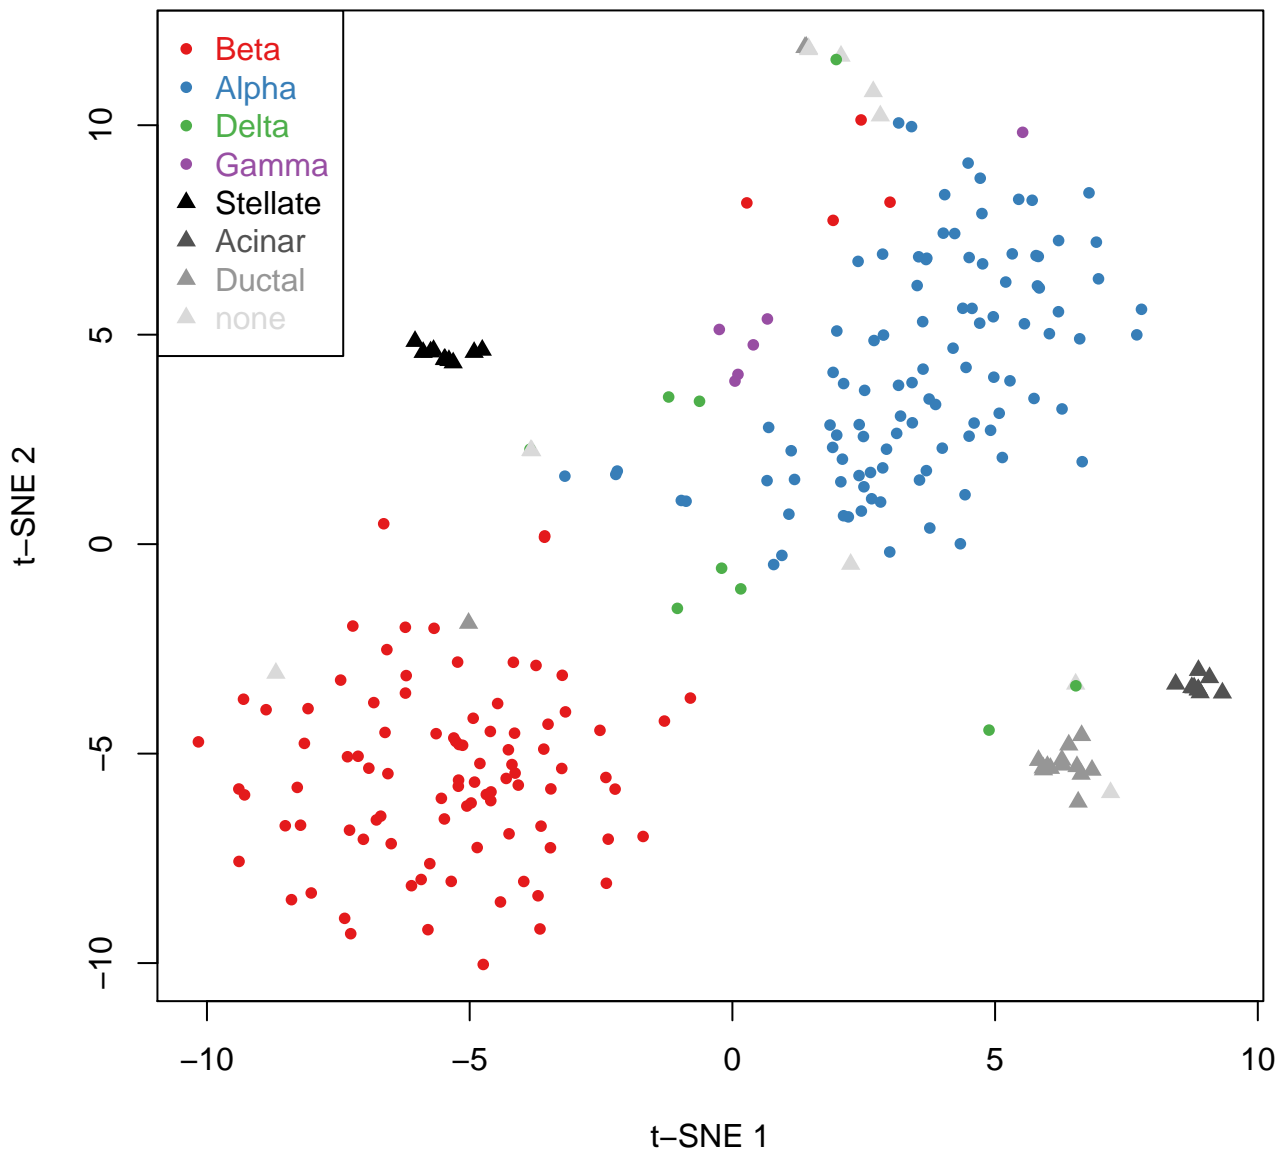

Supplemental\_Fig\_S13: Dimension reduction of Type 2 diabetic single cell transcriptomes to two dimensions by t-SNE without marker genes still shows robust grouping of samples by cell type.

Scatter plot of Type 2 diabetic single cells after reduction to two dimensions by t-SNE without marker genes (*INS*, *GCG*, *SST*, *PPY*, *GHRL*, *COL1A1*, *PRSS1*, and *KRT19*). 1900 highly expressed genes with  $\log_2(\text{CPM}) > 10.5$  were used in the analysis. Color labels are the same as shown in Figure 3A.
