# Supplementary material for: Single-cell transcriptomes identify human islet cell signatures and reveal cell-type–specific expression changes in type 2 diabetes
Source: HighWire-hosted journal article supplement (doi:10.1101/gr.212720.116), 2016-11-18
Supplement: Supplemental_Fig_S14.pdf [file Supplemental_Fig_S14.pdf]

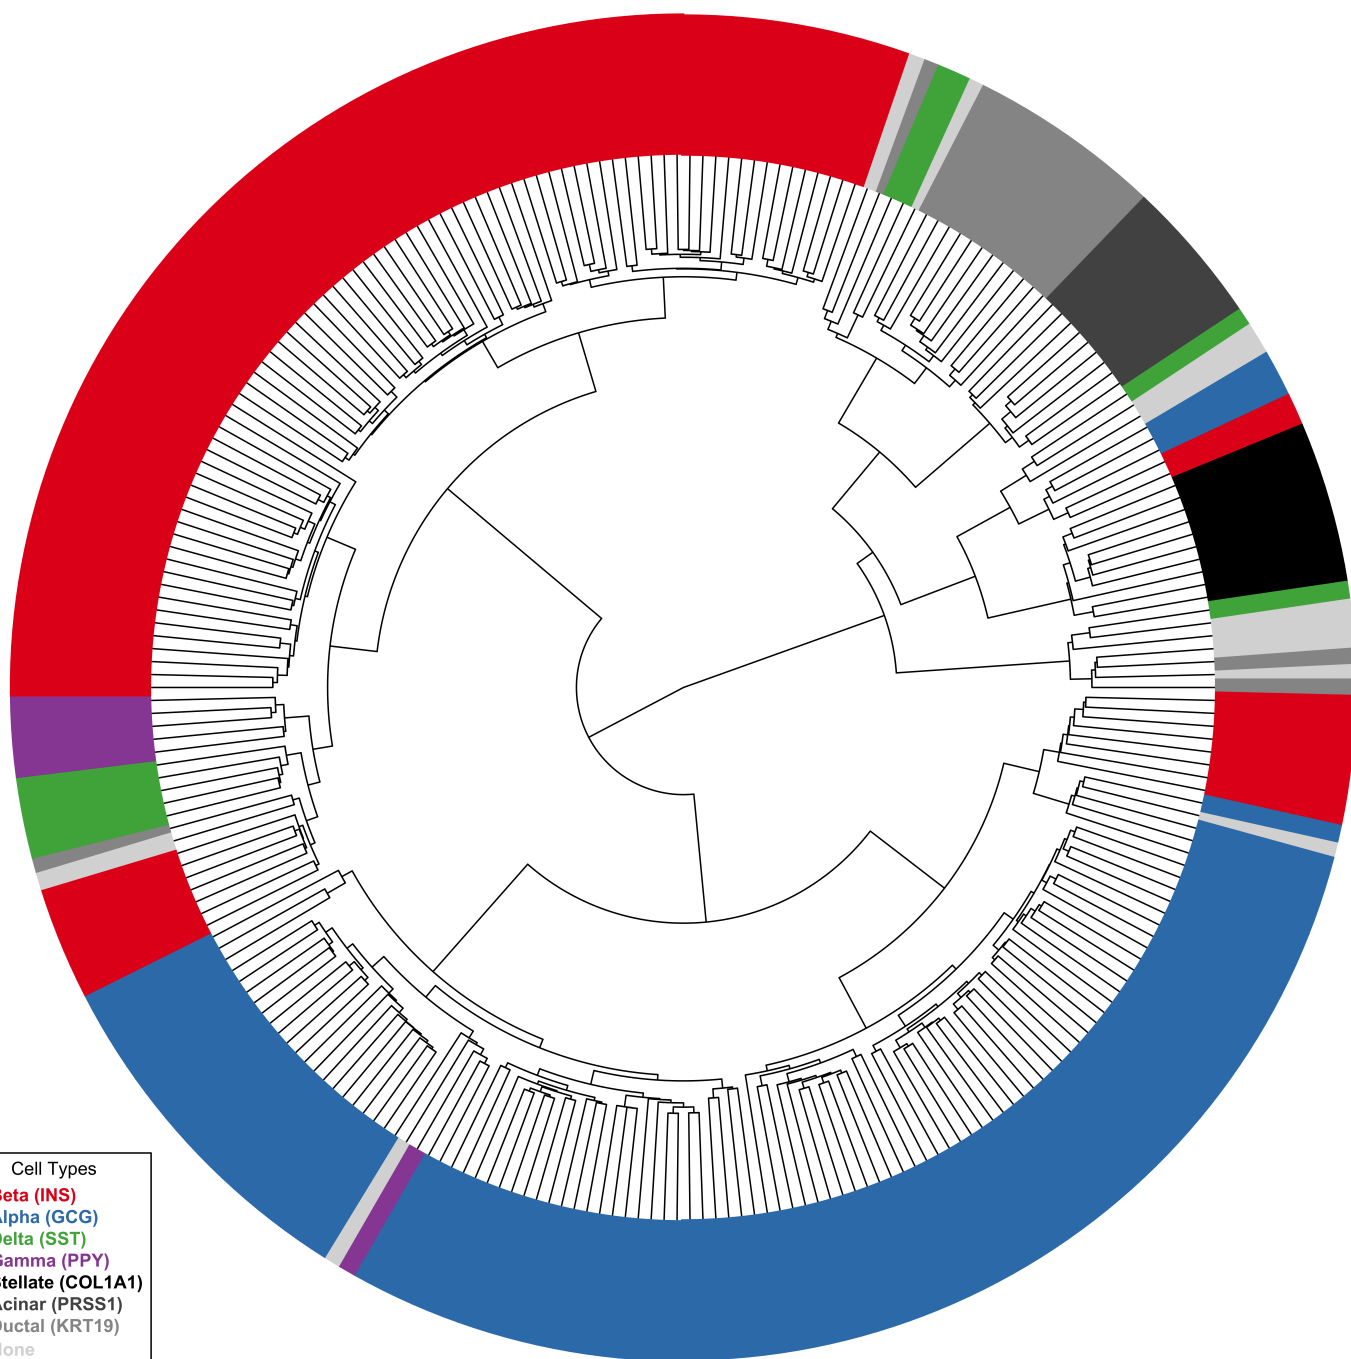

Supplemental\_Fig\_S14: Unsupervised clustering of Type 2 diabetic samples when excluding marker genes demonstrate distinct clustering by cell type.

Circular dendrogram of Type 2 diabetic single cell samples continues to demonstrate clear separation of cell transcriptomes by cell type. 1900 highly expressed genes with  $\log_2(\text{CPM}) > 10.5$  were used in the analysis. Color labels are the same as shown in Figure 3B.
