# Supplementary material for: Single-cell transcriptomes identify human islet cell signatures and reveal cell-type–specific expression changes in type 2 diabetes
Source: HighWire-hosted journal article supplement (doi:10.1101/gr.212720.116), 2016-11-18
Supplement: Supplemental_Fig_S16.pdf [file Supplemental_Fig_S16.pdf]

**A****eQTL Target Gene Expression in NonT2D Bulk Intact Islets**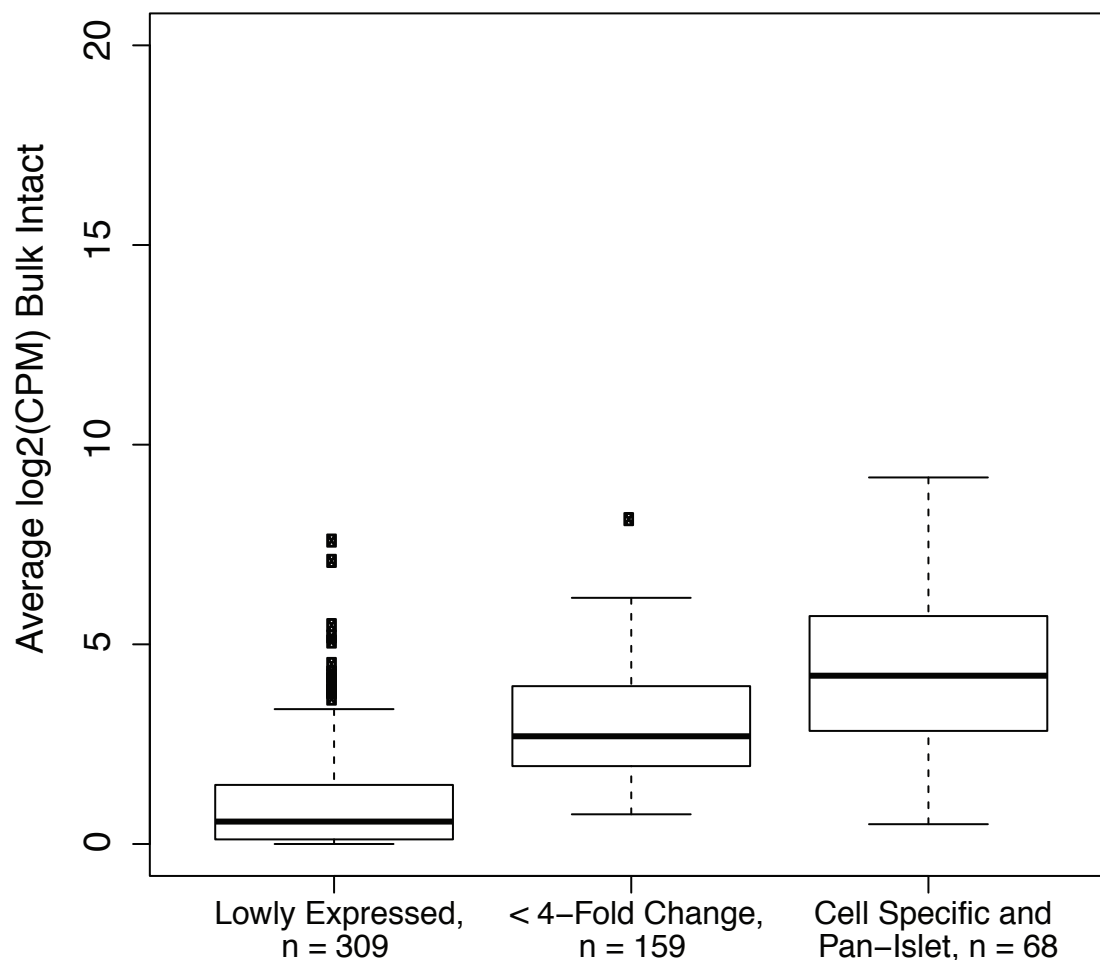**B****T1D/T2D Associated Gene Expression in NonT2D Bulk Intact Islets**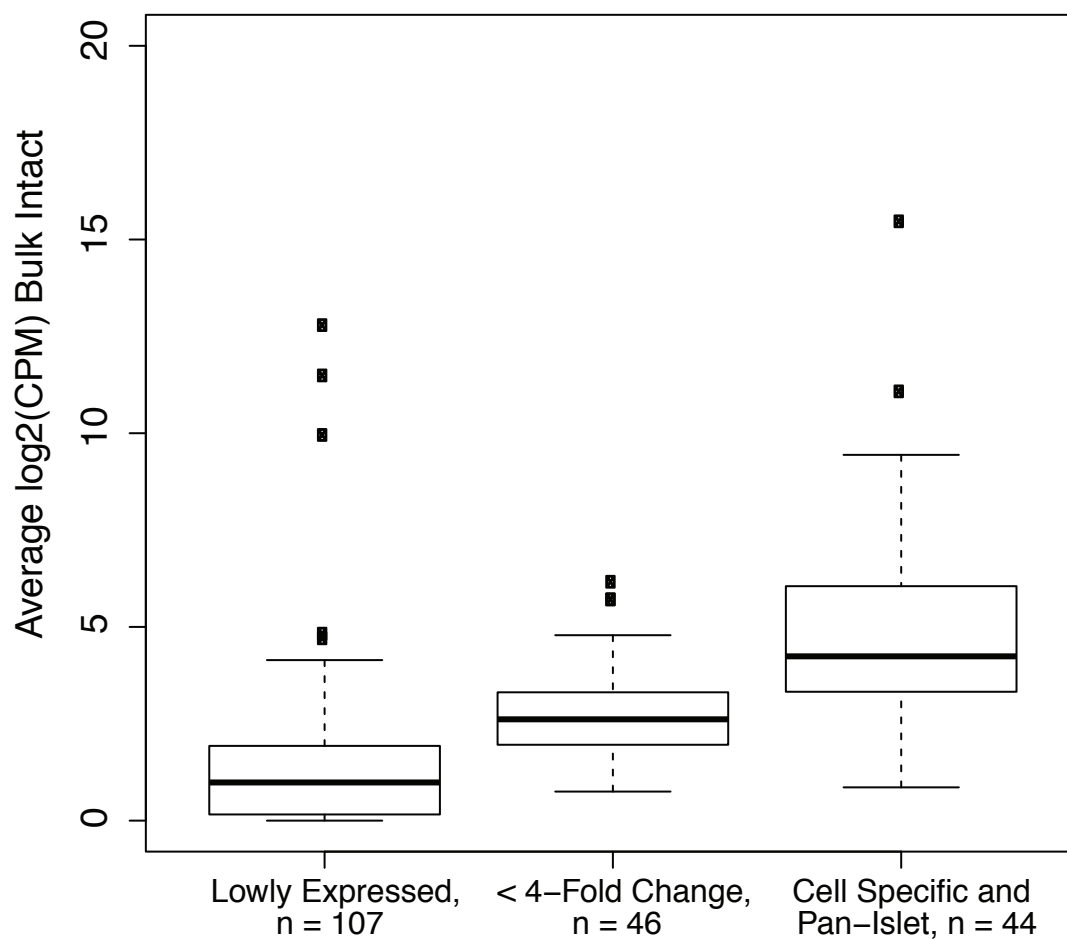

Figure\_S16: Reported Type 1 diabetes/Type 2 diabetes associated and eQTL genes that demonstrate cell specific expression patterns are more highly expressed in bulk intact islets in comparison to those that were classified as lowly expressed in our islet single cell data or not cell type-specific.

Boxplots showing the average  $\log_2$ CPM expression of eQTL (A) and Type 1/Type2 diabetes-associated genes (B) lowly expressed (average  $\log_2$ (CPM) < 2 in all cell types), not cell type enriched (< 4 fold change), and cell type-specific (> 4 fold change)/pan-islet (average  $\log_2$ (CPM) > 4 in all islet cell types) genes in 5 non-diabetic bulk intact islets.
