# Supplementary material for: Single-cell transcriptomes identify human islet cell signatures and reveal cell-type–specific expression changes in type 2 diabetes
Source: HighWire-hosted journal article supplement (doi:10.1101/gr.212720.116), 2016-11-18
Supplement: Supplemental_Fig_S17.pdf [file Supplemental_Fig_S17.pdf]

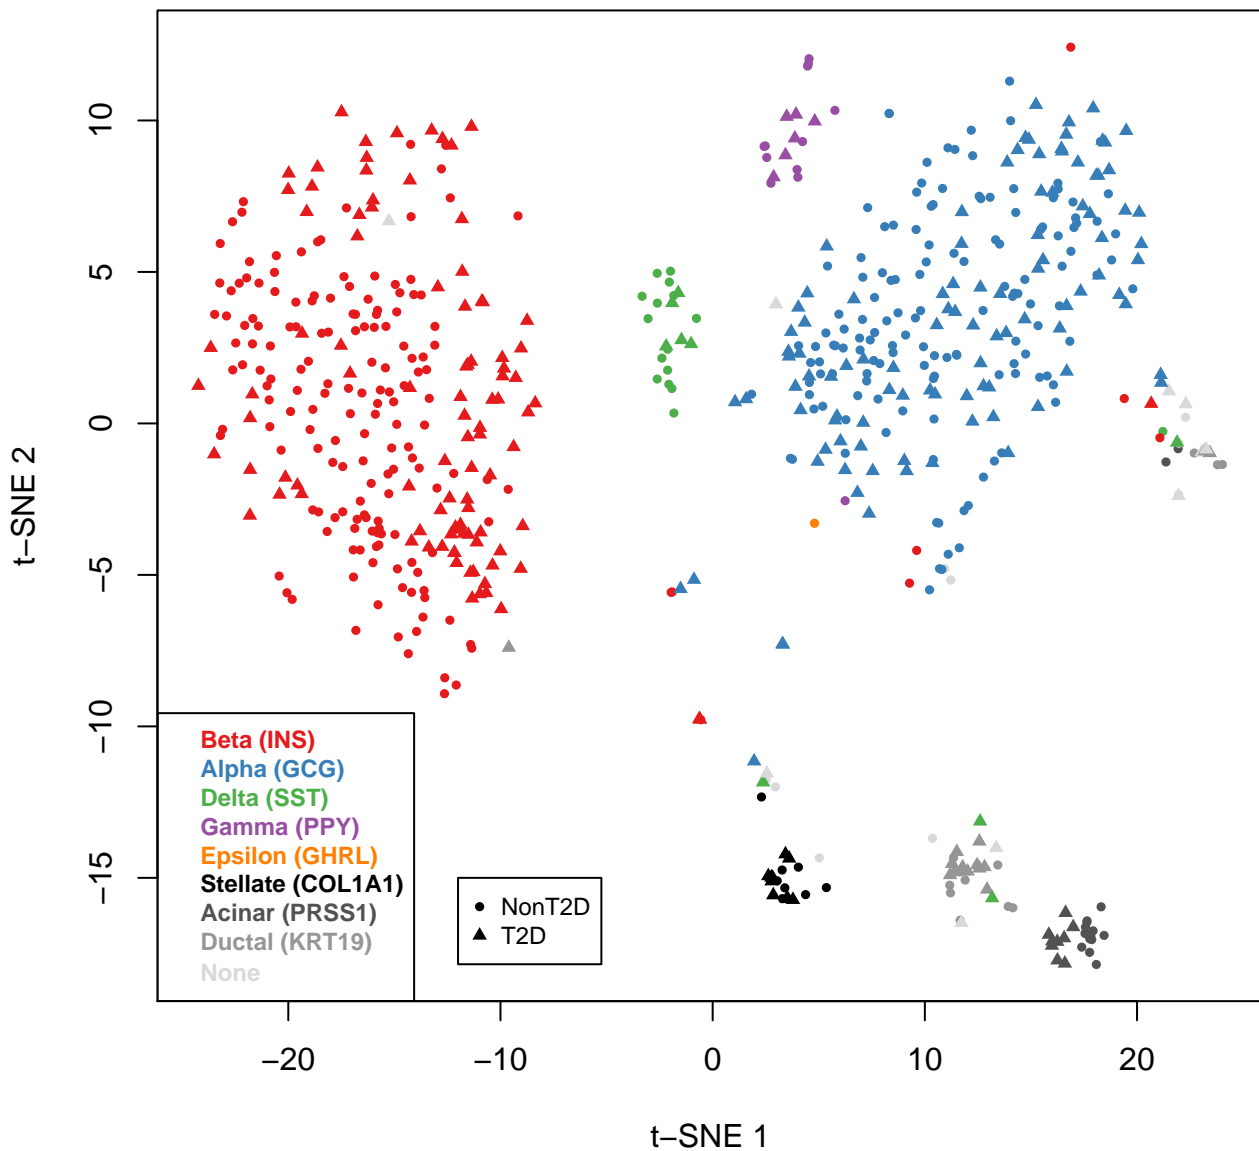

Supplemental\_Fig\_S17: Reduction of non-diabetic and Type 2 diabetic single cell transcriptomes to two dimensions via unsupervised t-SNE shows robust grouping by cell types regardless of disease state.

Scatter plot of non-diabetic and Type 2 diabetic single cell samples after t-SNE dimensionality reduction. Similar to the hierarchical clustering analysis, 2754 highly expressed genes with  $\log_2(\text{CPM}) > 10.5$  were used. Cell type identities, coloring, and disease state information were labeled after the t-SNE analysis. Circular points correspond to non-diabetic single cells while triangular points correspond to Type 2 diabetic single cells.
