# Supplementary material for: Single-cell transcriptomes identify human islet cell signatures and reveal cell-type–specific expression changes in type 2 diabetes
Source: HighWire-hosted journal article supplement (doi:10.1101/gr.212720.116), 2016-11-18
Supplement: Supplemental_Fig_S19.pdf [file Supplemental_Fig_S19.pdf]

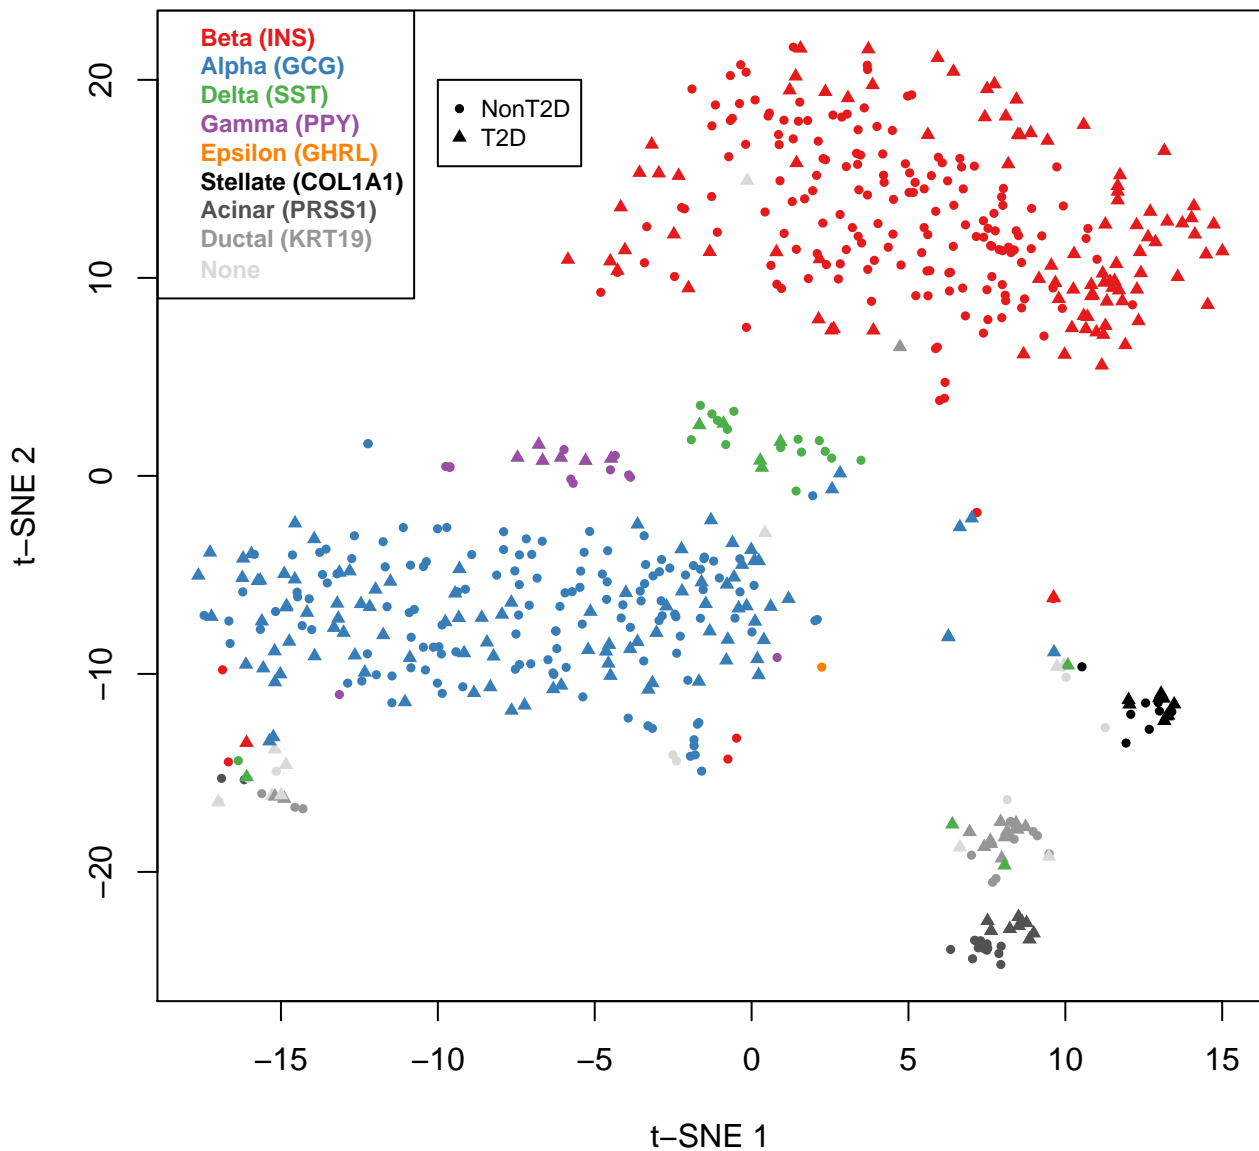

Supplemental\_Fig\_S19: Dimensionality reduction of non-diabetic and Type 2 diabetic single cell transcriptomes to two dimensions via unsupervised t-SNE after removing marker genes maintains clear separation of transcriptomes by cell types.

2-D Scatter plot of non-diabetic and Type 2 diabetic single cells after reduction to two dimensions by t-SNE without marker genes. 2746 highly expressed genes with  $\log_2(\text{CPM}) > 10.5$  were used. Cell type identities, coloring, and disease state information were labeled after the t-SNE analysis. Circular points correspond to non-diabetic single cells while triangular points correspond to Type 2 diabetic single cells.
