# Supplementary material for: Single-cell transcriptomes identify human islet cell signatures and reveal cell-type–specific expression changes in type 2 diabetes
Source: HighWire-hosted journal article supplement (doi:10.1101/gr.212720.116), 2016-11-18
Supplement: Supplemental_Fig_S22.pdf [file Supplemental_Fig_S22.pdf]

Supplemental\_Fig\_S22: Islet de-differentiation genes were not differentially expressed in single cell nor paired bulk intact islet transcriptomes.

(A) Box plots of  $\log_2$ CPM expression of islet de-differentiation markers as specified in Talchai et al. 2012 in islet single cell type transcriptomes. No genes showed significant differences (p-value < 0.05) in expression between diabetic and non-diabetic cell types after one-way ANOVA. (B) Box plots of  $\log_2$ CPM expression of islet de-differentiation markers in bulk intact islet transcriptomes. No genes showed significant differences (p-value < 0.05) in expression between diabetic and non-diabetic islets after one-way ANOVA. ND = Non-diabetic, T2D = type 2 diabetic, CPM = Counts per million.
