# Supplementary material for: Single-cell transcriptomes identify human islet cell signatures and reveal cell-type–specific expression changes in type 2 diabetes
Source: HighWire-hosted journal article supplement (doi:10.1101/gr.212720.116), 2016-11-18
Supplement: Supplemental_Fig_S24.pdf [file Supplemental_Fig_S24.pdf]

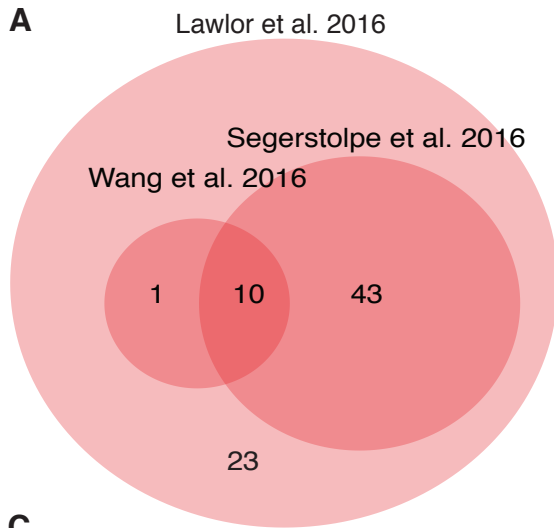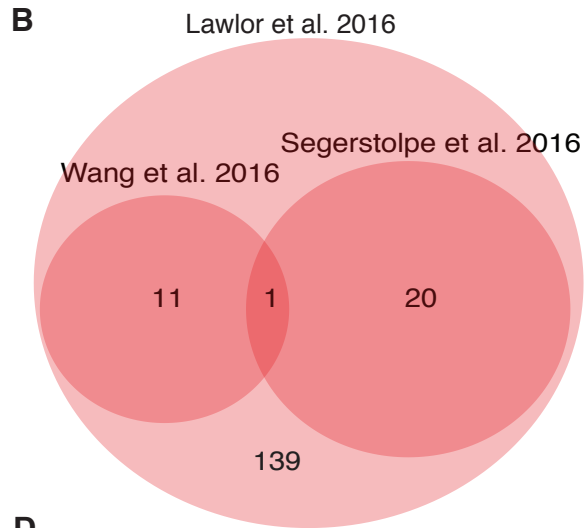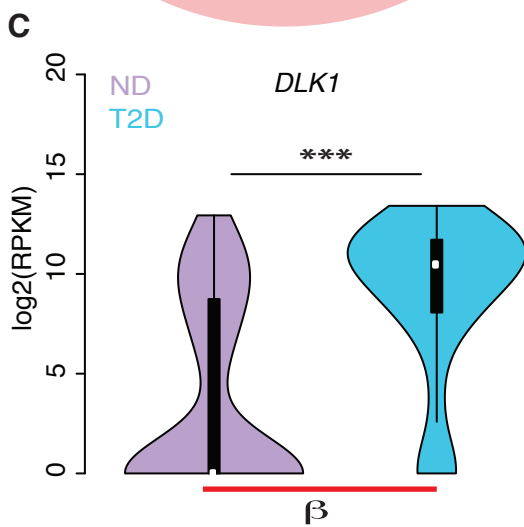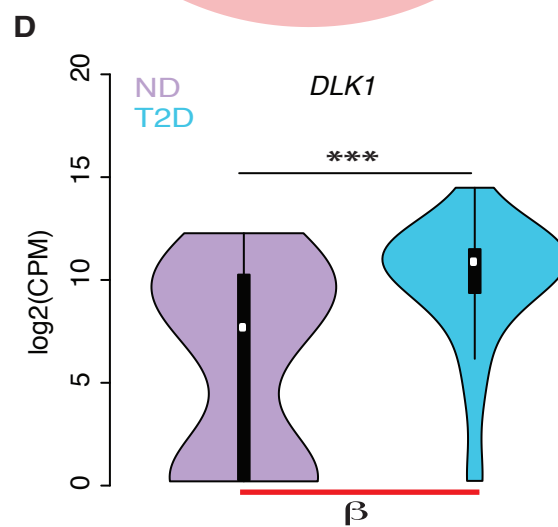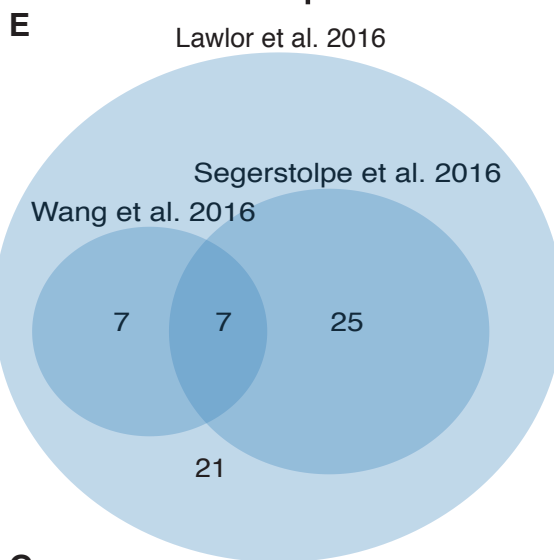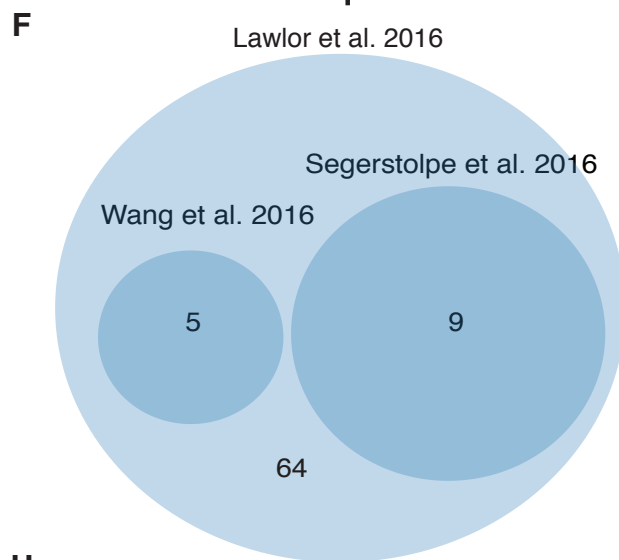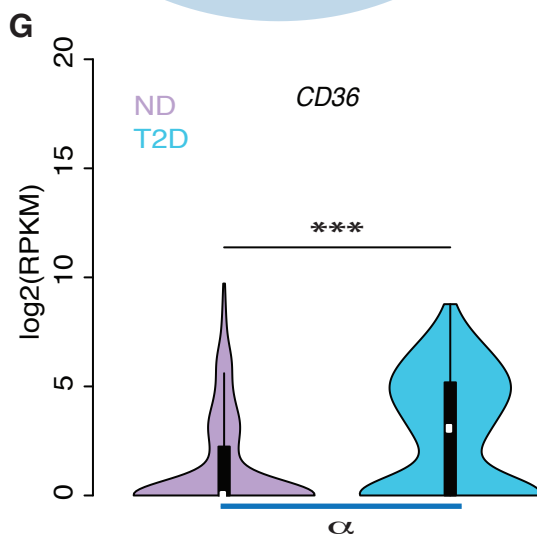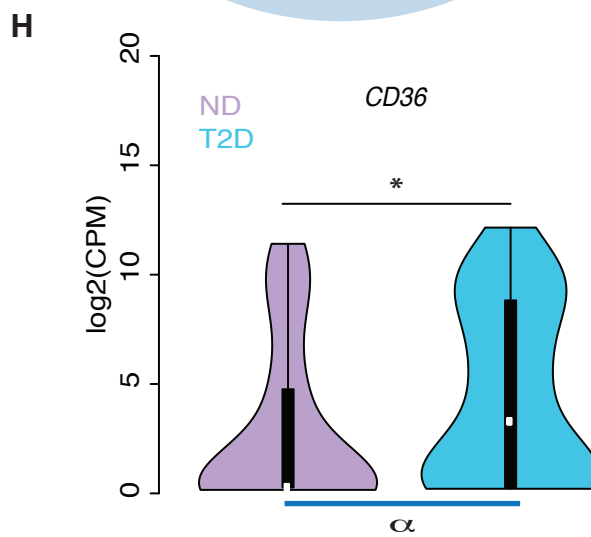

Supplemental\_Fig\_S24: Validation of genes differentially expressed in diabetic and non-diabetic cell types in independent human islet single cell transcriptomic studies.

For each cell type, we identified lists of genes that exhibited differential expression between non-diabetic and diabetic states. After two-sided Wilcoxon rank sum test of these cell type specific differentially expressed genes in the Wang et al. 2016 and Segerstolpe et al. 2016 datasets, we validated that 54/77 genes were significantly upregulated (p-value < 0.05) in diabetic beta cells from our dataset and either of the other two datasets (A). (B) 32/171 genes were significantly down-regulated in our data and the respective datasets. *DLK1* expression in diabetic and non-diabetic beta cells from (C) Segerstolpe et al. 2016 and (D) Wang et al. 2016 respectively. (E) 39/60 genes were enriched in diabetic alpha cells from our dataset and either of the two datasets. (F) 14/78 genes were verified as downregulated in diabetic alpha cells in our data and the two respective datasets. *CD36* expression in diabetic and non-diabetic alpha cells from (G) Segerstolpe et al. 2016 and (H) Wang et al. 2016 respectively. ND = non-diabetic, T2D = type 2 diabetic, RPKM = reads per kilobase of transcript per million mapped reads, CPM = counts per million, \* = p-value < 0.05, \*\*\* = p-value < 0.001,  $\beta$  = beta cell,  $\alpha$  = alpha cell.
