# Supplementary material for: Single-cell transcriptomes identify human islet cell signatures and reveal cell-type–specific expression changes in type 2 diabetes
Source: HighWire-hosted journal article supplement (doi:10.1101/gr.212720.116), 2016-11-18
Supplement: Supplemental_Methods_Source_Code.zip [file Figure_5F_Source_Code.pdf › Supplemental_Methods_Source_Code/Figure5_Source_Code/Figure_5F_Source_Code.pdf]

# Cell Type Specific Gene Expression Differences Are Masked by Islet Cellular Heterogeneity

## Introduction

We compared the transcriptional differences between T2D and ND endocrine cells without first segregating them into islet cell types (334 ND and 212 T2D single cell profiles). Approximately 2/3 of beta (n=165/248), one half of alpha (n=67/138), and over 90% of delta (n=23/24) cell-specific changes in gene expression were missed when cell types were not defined and specifically compared. The decreased heterogeneity in the transcriptional profiles of cell type-specific comparisons provides increased power in detecting the transcriptomic differences and validates the importance of single-cell analysis in understanding the molecular basis of T2D.

```
rm(list=ls())
# Load in libraries
suppressPackageStartupMessages(library(d3vennR))
suppressPackageStartupMessages(library(venneuler))
library(d3vennR)
library(venneuler)
rm(list=ls())

# Load in differential lists
setwd("/Users/lawlon/Documents/Final_RNA_Seq_3/Differential_Expression_3/Single_Cell/T2D_vs_NonT2D_3/Si

beta <- read.csv("EdgeR.Robust.T2D.vs.NonT2D.Gender.Covariate.Beta.FDR.0.05.csv",
                 header = T, check.names = F, row.names = 1)
alpha <- read.csv("EdgeR.Robust.T2D.vs.NonT2D.Gender.Covariate.Alpha.FDR.0.05.csv",
                  header = T, check.names = F, row.names = 1)
delta <- read.csv("EdgeR.Robust.T2D.vs.NonT2D.Gender.Covariate.Delta.FDR.0.05.csv",
                  header = T, check.names = F, row.names = 1)
recon_endo <- read.csv("/Users/lawlon/Documents/Final_RNA_Seq_3/Differential_Expression_3/Single_Cell/T

                        header = T, check.names = F, row.names = 1)

# Perform intersections of DE genes with reconst pancreas and islets
int.b.i <- intersect(beta$Associated.Gene.Name, recon_endo$Associated.Gene.Name)
int.a.i <- intersect(alpha$Associated.Gene.Name, recon_endo$Associated.Gene.Name)
int.d.i <- intersect(delta$Associated.Gene.Name, recon_endo$Associated.Gene.Name)

# Intersection between alpha and beta
int.b.a <- intersect(beta$Associated.Gene.Name, alpha$Associated.Gene.Name)
int.b.d <- intersect(beta$Associated.Gene.Name, delta$Associated.Gene.Name)
int.a.d <- intersect(alpha$Associated.Gene.Name, delta$Associated.Gene.Name)

# intersection between three groups
int.b.a.i. <- intersect(int.b.i, alpha$Associated.Gene.Name)
int.b.d.i <- intersect(int.b.i, delta$Associated.Gene.Name)

# create venn diagram
venn <- venneuler(c(Beta = dim(beta)[1], Alpha = dim(alpha)[1], Delta = 50,
                    Reconstituted_Islet = dim(recon_endo)[1],
                    "Beta&Reconstituted_Islet" = length(int.b.i),
```

```

        "Alpha&Reconstituted_Islet" = length(int.a.i),
        "Delta&Reconstituted_Islet" = length(int.d.i),
        "Beta&Alpha"=length(int.b.a), "Beta&Delta"=length(int.b.d)))
# venn diagram labels
venn$labels <- c(
  paste("Beta\n", dim(beta)[1]),
  paste("Alpha\n", dim(alpha)[1]),
  paste("Delta\n", dim(delta)[1]),
  paste("Islet Single Cell Ensemble \n", dim(recon_endo)[1])
)

# Plot venn diagram
plot(venn, col = c("#e41a1c", "#377eb8", "#4daf4a", "#654321"), cex = 1)

```

## Session Information

```

suppressPackageStartupMessages(library(d3vennR))
suppressPackageStartupMessages(library(venneuler))
library(d3vennR)
library(venneuler)
sessionInfo()

## R version 3.3.0 (2016-05-03)
## Platform: x86_64-apple-darwin13.4.0 (64-bit)
## Running under: OS X 10.11.6 (El Capitan)
##
## locale:
##  [1] en_US.UTF-8/en_US.UTF-8/en_US.UTF-8/C/en_US.UTF-8/en_US.UTF-8
##
## attached base packages:
##  [1] stats      graphics  grDevices  utils      datasets  methods   base
##
## other attached packages:
##  [1] venneuler_1.1-0 rJava_0.9-8    d3vennR_0.1
##
## loaded via a namespace (and not attached):
##  [1] Rcpp_0.12.7      digest_0.6.10   assertthat_0.1  formatR_1.4
##  [5] magrittr_1.5     evaluate_0.10   stringi_1.1.2   rmarkdown_1.1
##  [9] tools_3.3.0     stringr_1.1.0   htmlwidgets_0.7 yaml_2.1.13
## [13] htmltools_0.3.5 knitr_1.14      tibble_1.2

```
