# Supplementary material for: Single-cell transcriptomes identify human islet cell signatures and reveal cell-type–specific expression changes in type 2 diabetes
Source: HighWire-hosted journal article supplement (doi:10.1101/gr.212720.116), 2016-11-18
Supplement: Supplemental_Methods_Source_Code.zip [file Supplemental_Table_S5_Source_Code.pdf › Supplemental_Methods_Source_Code/Supplemental_Table_Source_Code/Supplemental_Table_S5_Source_Code.pdf]

# Computational assignment of cell cycle phases shows islet single cell samples are not actively undergoing mitosis

## Introduction

We implemented the R-package `scrnan_1.04` to investigate whether our dataset contained proliferative islet cells. Specifically, we implemented the function “cyclone” to computationally assign single cell samples into cell cycle phases (G1, G2/M, or S phase) based on their expression of human cell cycle markers.

## Islet Single Cells are not actively dividing

```
rm(list = ls())
suppressPackageStartupMessages(library(Biobase))
suppressPackageStartupMessages(library(scran))
library(Biobase)
library(scran)
# Load in single cell data
setwd("/Users/lawlon/Documents/Final_RNA_Seq_3/Data/")
load("nonT2D.rdata")
p.anns <- featureData(cnts.eset)
probe.anns <- as(p.anns, "data.frame")
ND.anns <- pData(cnts.eset)
# Remove multiples and keep all other groups
ND.sel <- ND.anns[ND.anns$cell.type %in% c("INS", "PPY", "GCG", "SST", "COL1A1", "KRT19", "PRSS1", "nonT2D"), ]
# selected exp data
ND.counts <- exprs(cnts.eset)
ND.cnts.sel <- ND.counts[, rownames(ND.sel)]
load("T2D.rdata")
T2D.anns <- pData(cnts.eset)
# Remove multiples and keep all other groups
T2D.sel <- T2D.anns[T2D.anns$cell.type %in% c("INS", "PPY", "GCG", "SST", "COL1A1", "KRT19", "PRSS1", "T2D"), ]
# selected exp data
T2D.counts <- exprs(cnts.eset)
T2D.cnts.sel <- T2D.counts[, rownames(T2D.sel)]
# Combine sample anns and expression data
all.counts <- cbind(ND.cnts.sel, T2D.cnts.sel)
s.anns.sel <- rbind(ND.sel, T2D.sel)
# create sce object
sce <- newSCESet(countData=data.frame(all.counts))
# normalize cell specific biases
sce <- computeSumFactors(sce, sizes=c(20, 40, 60, 80))
summary(sizeFactors(sce))
sce <- normalize(sce)
colnames(sce) <- colnames(all.counts)
# Get normalized exp data
scrnan.data <- exprs(sce)
colnames(scrnan.data) <- colnames(all.counts)
```

```

# load human cell cycle markers
hs.pairs <- readRDS(system.file("exdata", "human_cycle_markers.rds", package="scraper"))
assigned <- cyclone(sce, pairs=hs.pairs)
head(assigned$scores)

phase <- rep("S", ncol(sce))
phase[assigned$scores$G1 > 0.5] <- "G1"
phase[assigned$scores$G2M > 0.5] <- "G2M"
phase[assigned$scores$G1 > 0.5 & assigned$scores$G2M > 0.5] <- "unknown"
table(phase)

# append cell cycle info to sample anns
s.cc <- cbind(s.anns.sel, phase)
# table of cell type vs cell cycle phase
tab <- table(s.cc$cell.type, s.cc$phase)

```

## Session Information

```

suppressPackageStartupMessages(library(Biobase))
suppressPackageStartupMessages(library(scran))

## Warning: package 'scraper' was built under R version 3.3.1
## Warning: package 'BiocParallel' was built under R version 3.3.1

library(Biobase)
library(scran)
sessionInfo()

## R version 3.3.0 (2016-05-03)
## Platform: x86_64-apple-darwin13.4.0 (64-bit)
## Running under: OS X 10.11.6 (El Capitan)
##
## locale:
##  [1] en_US.UTF-8/en_US.UTF-8/en_US.UTF-8/C/en_US.UTF-8/en_US.UTF-8
##
## attached base packages:
## [1] parallel stats graphics grDevices utils datasets methods
## [8] base
##
## other attached packages:
## [1] scraper_1.0.4 scater_1.0.4 ggplot2_2.1.0
## [4] BiocParallel_1.6.6 Biobase_2.32.0 BiocGenerics_0.18.0
##
## loaded via a namespace (and not attached):
## [1] Rcpp_0.12.7 formatR_1.4 plyr_1.8.4
## [4] zlibbioc_1.18.0 viridis_0.3.4 bitops_1.0-6
## [7] tools_3.3.0 biomaRt_2.28.0 digest_0.6.10
## [10] lattice_0.20-34 rhdf5_2.16.0 evaluate_0.10
## [13] RSQLite_1.0.0 tibble_1.2 gtable_0.2.0
## [16] Matrix_1.2-7.1 shiny_0.14.1 DBI_0.5-1
## [19] yaml_2.1.13 gridExtra_2.2.1 dplyr_0.5.0
## [22] stringr_1.1.0 knitr_1.14 IRanges_2.6.1

```

|         |                      |                       |                  |
|---------|----------------------|-----------------------|------------------|
| ## [25] | S4Vectors_0.10.3     | stats4_3.3.0          | grid_3.3.0       |
| ## [28] | shinydashboard_0.5.3 | data.table_1.9.6      | R6_2.2.0         |
| ## [31] | AnnotationDbi_1.34.4 | XML_3.98-1.4          | rmarkdown_1.1    |
| ## [34] | limma_3.28.21        | reshape2_1.4.1        | edgeR_3.14.0     |
| ## [37] | magrittr_1.5         | matrixStats_0.51.0    | scales_0.4.0     |
| ## [40] | htmltools_0.3.5      | dynamicTreeCut_1.63-1 | tximport_1.0.3   |
| ## [43] | assertthat_0.1       | mime_0.5              | colorspace_1.2-7 |
| ## [46] | xtable_1.8-2         | httpuv_1.3.3          | stringi_1.1.2    |
| ## [49] | RCurl_1.95-4.8       | munsell_0.4.3         | rjson_0.2.15     |
| ## [52] | chron_2.3-47         | zoo_1.7-13            |                  |
